# Supplementary material for: Phagocytosis of microbial symbionts supports embryonic nutrition in the sponge Halichondria panicea
Source: Research Square preprint supplement (doi:10.21203/rs.3.rs-7749905/v1), 2025-12-02
Supplement: Supplementary file 1 [file 135326a1937f0a9cfc030139.xlsx]

## Sheet: DE_March_NonReprovsFemalesOocyt
			Non reproductive		FEMALES				Annotation
transcript_ID	PValue	FDR	Hp_16	Hp_17	Hp_26	Hp_20	Hp_27	Hp_30	IMG	Blast_vs_Swissprot_BACT	Annotation_from_Susy_genome	FANTASIA	TAG
TRINITY_DN1458_c0_g1_i5	2.98e-05	0.0447958	15.06	11.1	0	0	0	0	#N/A	#N/A	#N/A	GO:0006397	Up in Non Reproductive
TRINITY_DN31226_c1_g1_i36	3.16e-05	0.0447958	19.43	8.49	0	0	0	0	#N/A	#N/A	#N/A	GO:0000724	Up in Non Reproductive
TRINITY_DN6907_c0_g1_i17	3.73e-05	0.0471471	5.92	24.18	0	0	0	0	#N/A	#N/A	#N/A	GO:0006964	Up in Non Reproductive
TRINITY_DN8672_c0_g1_i45	2.49e-07	0.00188418	55.49	43.19	0	0	0.99	0	#N/A	#N/A	#N/A	GO:0030154	Up in Non Reproductive
TRINITY_DN97_c0_g1_i14	1.53e-05	0.0298394	18.41	16.76	0	0	0	0	#N/A	#N/A	#N/A	GO:0007165	Up in Non Reproductive
TRINITY_DN7746_c0_g1_i1	1.53e-05	0.0298394	20.17	15.27	0	0	0	0	#N/A	#N/A	#N/A	GO:0035194	Up in Non Reproductive
TRINITY_DN690_c0_g1_i22	1.58e-05	0.0298394	9.1	35.28	0	0	0	0	#N/A	#N/A	#N/A	GO:0070588	Up in Non Reproductive
TRINITY_DN3124_c0_g1_i51	1.2e-05	0.0298394	34.37	11.48	0	0	0	0	#N/A	#N/A	#N/A	GO:0070588	Up in Non Reproductive
TRINITY_DN554_c1_g1_i3	1.17e-05	0.0298394	9.02	43.9	0	0	0	0	#N/A	#N/A	#N/A	GO:0051260	Up in Non Reproductive
TRINITY_DN5880_c0_g1_i23	5.22e-06	0.029623	19.36	35.48	0	0	0	0	#N/A	#N/A	#N/A	GO:0000226	Up in Non Reproductive
TRINITY_DN437_c0_g1_i19	7.84e-06	0.0298394	9.42	48.95	0	0	0	0	#N/A	#N/A	#N/A	GO:0007157	Up in Non Reproductive
TRINITY_DN11409_c2_g1_i1	9.07e-06	0.0298394	34.99	13.91	0	0	0	0	#N/A	#N/A	#N/A	GO:0030153	Up in Non Reproductive
TRINITY_DN12292_c0_g1_i5	9.83e-06	0.0298394	4	62.83	0	0	0	0	#N/A	#N/A	#N/A	GO:0000165	Up in Non Reproductive
TRINITY_DN877_c0_g1_i21	2.31e-07	0.00188418	5	113.76	0	0	0	0	#N/A	#N/A	#N/A	GO:0007189	Up in Non Reproductive
TRINITY_DN7899_c0_g1_i1	1.11e-08	0.000252755	76.9	34.45	0	0	0	0	#N/A	#N/A	#N/A	GO:0030435	Up in Non Reproductive
TRINITY_DN7746_c0_g1_i3	3.12e-05	0.0447958	0	0	45.26	41.5	27.18	33	#N/A	#N/A	#N/A	GO:0006123	Up in Females with oocytes
TRINITY_DN1851_c0_g1_i33	3.74e-05	0.0471471	0	0	52.63	37.66	18.12	44.45	#N/A	#N/A	#N/A	GO:0039695	Up in Females with oocytes
TRINITY_DN1617_c0_g1_i12	2.17e-05	0.0378248	0	0	65.65	71.54	41.99	66.2	#N/A	#N/A	#N/A	GO:1902895	Up in Females with oocytes

## Sheet: DE_April_females_vs_males
			FEMALES				MALES				Annotation
transcript_ID	PValue	FDR	Hp_43	Hp_35	Hp_31	Hp_33	Hp_37	Hp_40	Hp_41	Hp_42	IMG	Blast_vs_Swissprot_BACT	Annotation_from_Susy_genome	FANTASIA	TAG
TRINITY_DN1879_c0_g1_i4	3.25e-05	0.0146357	0	0	882.61	46.75	0	0	0	0	#N/A	#N/A	#N/A	GO:0045944	Up in Females
TRINITY_DN1377_c0_g2_i2	0.000582756	0.0495358	2.8	3	3.14	3	0	0	0	0	#N/A	#N/A	#N/A	GO:0019068	Up in Females
TRINITY_DN2296_c0_g1_i10	0.000109093	0.0250695	27.28	8.98	24.68	28.91	0	1.39	1.49	0	#N/A	#N/A	#N/A	GO:0039557	Up in Females
TRINITY_DN41138_c0_g1_i7	0.000510502	0.0472513	3.3	2	4.64	4.09	0.02	0	0	0	#N/A	#N/A	#N/A	GO:0002682	Up in Females
TRINITY_DN6881_c0_g1_i4	0.000406335	0.0428465	19.81	13.77	18.61	9.01	1.55	0	0	0	#N/A	#N/A	#N/A	GO:0040015	Up in Females
TRINITY_DN16770_c0_g2_i1	0.000483508	0.0462359	2	4	4	4	0	0	0	0	#N/A	#N/A	#N/A	GO:0006809	Up in Females
TRINITY_DN16265_c2_g1_i1	0.000385701	0.0426071	3	3	4	5	0	0	0	0	#N/A	#N/A	#N/A	GO:0051260	Up in Females
TRINITY_DN24_c0_g1_i1	0.000259557	0.036647	32.93	22.32	32.5	2.35	0	0	2.63	0	#N/A	#N/A	#N/A	GO:0018108	Up in Females
TRINITY_DN935_c2_g1_i3	0.000201604	0.0327956	6	4	5.23	3	0	0	0	0	#N/A	#N/A	#N/A	GO:0098671	Up in Females
TRINITY_DN34832_c0_g1_i2	0.000241165	0.0349385	6	4	3	5	0	0	0	0	#N/A	#N/A	#N/A	GO:0002347	Up in Females
TRINITY_DN45304_c0_g3_i1	0.000202202	0.0327956	6.84	3	5.82	3.47	0	0	0	0	#N/A	#N/A	#N/A	GO:0006412	Up in Females
TRINITY_DN1579_c3_g1_i17	0.000237576	0.0347211	6.65	7.24	2.91	2.95	0	0	0	0	#N/A	#N/A	#N/A	GO:0007338	Up in Females
TRINITY_DN3646_c0_g3_i3	0.000170023	0.0306235	5.75	6.68	3.91	3.55	0	0	0	0	#N/A	#N/A	#N/A	GO:0046740	Up in Females
TRINITY_DN6039_c0_g1_i8	0.000271844	0.0366686	6.2	10.27	3.09	2.14	0	0	0	0	#N/A	#N/A	#N/A	GO:0001934	Up in Females
TRINITY_DN16757_c0_g1_i1	8.93e-05	0.0234258	9	5	5	5	0	0	0	0	#N/A	#N/A	#N/A	#N/A	Up in Females
TRINITY_DN10084_c0_g2_i1	0.000187576	0.031727	9	9	2	4	0	0	0	0	#N/A	#N/A	#N/A	GO:0046740	Up in Females
TRINITY_DN24_c0_g1_i7	0.000228469	0.0341381	13.18	1.82	9.41	2.47	0	0	0	0	#N/A	#N/A	#N/A	GO:0018108	Up in Females
TRINITY_DN1705_c0_g1_i1	0.000190549	0.031831	4.67	2	7.19	10.76	0	0	0	0	#N/A	#N/A	#N/A	GO:0007165	Up in Females
TRINITY_DN7933_c5_g1_i1	0.000560124	0.0487307	13	47	28	0	0	1	0	0	#N/A	#N/A	#N/A	GO:0006123	Up in Females
TRINITY_DN11065_c0_g1_i1	8.51e-05	0.0229459	4	8	6	9	0	0	0	0	#N/A	#N/A	#N/A	GO:0007165	Up in Females
TRINITY_DN29734_c0_g2_i5	5.11e-05	0.0177117	9	8	7	5	0	0	0	0	#N/A	#N/A	#N/A	GO:1902081	Up in Females
TRINITY_DN21695_c0_g2_i4	0.000251555	0.0358207	4.52	6.9	3.25	3.48	0	0	0	0	#N/A	#N/A	#N/A	GO:0006955	Up in Females
TRINITY_DN3194_c0_g1_i2	0.000195602	0.0324262	6.29	5.3	3.86	3.43	0	0	0	0	#N/A	#N/A	#N/A	GO:0070096	Up in Females
TRINITY_DN9109_c0_g1_i11	0.000140217	0.028325	5.25	4.11	4.79	5.88	0	0	0	0	#N/A	#N/A	#N/A	#N/A	Up in Females
TRINITY_DN1094_c0_g1_i23	0.00015032	0.0290125	1.76	7.37	15	5.31	0	0	0	0	#N/A	#N/A	#N/A	GO:0030335	Up in Females
TRINITY_DN14456_c0_g1_i1	0.000486547	0.0462359	16.88	5.68	9.34	0	0	0	0	0	#N/A	#N/A	#N/A	GO:0016037	Up in Females
TRINITY_DN7322_c0_g1_i1	7.37e-05	0.0214118	7.26	3.12	12.61	7.61	0	0	0	0	#N/A	#N/A	#N/A	GO:0048709	Up in Females
TRINITY_DN10563_c3_g1_i1	0.000523071	0.0475454	13	11	0	6	0	0	0	0	#N/A	#N/A	#N/A	#N/A	Up in Females
TRINITY_DN104132_c0_g1_i1	0.000568208	0.0489232	8	16	0	6	0	0	0	0	#N/A	#N/A	#N/A	#N/A	Up in Females
TRINITY_DN30759_c0_g1_i5	5.32e-05	0.0177117	12.14	8	9	3.39	0	0	0	0	#N/A	#N/A	#N/A	GO:0042060	Up in Females
TRINITY_DN9991_c0_g1_i11	0.000478264	0.046192	14.52	6.81	0	9.96	0	0	0	0	#N/A	#N/A	#N/A	#N/A	Up in Females
TRINITY_DN2570_c1_g1_i4	9.99e-05	0.0239488	6.06	8.86	16.01	2.08	0	0	0	0	#N/A	#N/A	#N/A	GO:0001502	Up in Females
TRINITY_DN5119_c0_g1_i1	0.000395225	0.0426475	10.45	7.26	16.68	0	0	0	0	0	#N/A	#N/A	#N/A	GO:0007094	Up in Females
TRINITY_DN11565_c0_g1_i10	0.000428672	0.0440858	14	12	0	7	0	0	0	0	#N/A	#N/A	#N/A	GO:0051321	Up in Females
TRINITY_DN2773_c0_g1_i1	0.000422882	0.0440776	0	9.87	12.25	10	0	0	0	0	#N/A	#N/A	#N/A	GO:0051457	Up in Females
TRINITY_DN789_c7_g1_i3	0.000506153	0.0471839	15.45	3	19.67	0	0	0	0	0	#N/A	#N/A	#N/A	#N/A	Up in Females
TRINITY_DN9321_c0_g1_i27	0.000354661	0.0409897	17.1	11.73	7.97	0	0	0	0	0	#N/A	#N/A	#N/A	GO:0007165	Up in Females
TRINITY_DN1699_c0_g1_i64	0.000386879	0.0426071	10.04	11.71	0	12.24	0	0	0	0	#N/A	#N/A	#N/A	GO:0030420	Up in Females
TRINITY_DN3460_c0_g1_i4	0.000327415	0.0398167	15.8	0	14.61	8.04	0	0	0	0	#N/A	#N/A	#N/A	GO:0021987	Up in Females
TRINITY_DN20459_c0_g1_i19	0.000372889	0.0417828	0.02	12.55	9.31	12.94	0	0	0	0	#N/A	#N/A	#N/A	GO:0006974	Up in Females
TRINITY_DN1225_c0_g1_i9	4.58e-05	0.0177117	11.58	12.89	14.11	3.64	0.05	0	0	0	#N/A	#N/A	#N/A	GO:0051321	Up in Females
TRINITY_DN607_c0_g1_i36	0.000388126	0.0426071	10.4	0	7.86	18.32	0	0	0	0	#N/A	#N/A	#N/A	GO:1901224	Up in Females
TRINITY_DN2098_c0_g1_i112	0.000431288	0.0441183	6.73	18.71	0	10.33	0	0	0	0	#N/A	#N/A	#N/A	GO:0045333	Up in Females
TRINITY_DN127_c1_g1_i23	0.000488696	0.0462359	0	4.1	22.43	11.31	0	0	0	0	#N/A	#N/A	#N/A	GO:0032310	Up in Females
TRINITY_DN18037_c0_g1_i20	4.74e-05	0.0177117	18.01	5	14.36	4	0	0	0	0	#N/A	#N/A	#N/A	GO:0031146	Up in Females
TRINITY_DN2440_c0_g1_i2	0.000314995	0.039164	20.7	0	12.88	8.27	0	0	0	0	#N/A	#N/A	#N/A	GO:0030683	Up in Females
TRINITY_DN127_c1_g1_i2	0.000484156	0.0462359	9.98	0	4.67	24.57	0	0	0	0	#N/A	#N/A	#N/A	GO:0032757	Up in Females
TRINITY_DN3249_c0_g1_i8	3.79e-05	0.0162722	22.58	8.04	7.01	6.01	0	0	0	0	#N/A	#N/A	#N/A	GO:1905117	Up in Females
TRINITY_DN3406_c0_g1_i27	0.000333206	0.0399698	6.66	17.76	18.78	0	0	0	0	0	#N/A	#N/A	#N/A	GO:0030683	Up in Females
TRINITY_DN2219_c0_g1_i26	0.000288042	0.0372009	10	19	15	0	0	0	0	0	#N/A	#N/A	#N/A	GO:0031640	Up in Females
TRINITY_DN2821_c0_g1_i18	0.000279191	0.0366686	16.88	12.48	0	13.86	0	0	0	0	#N/A	#N/A	#N/A	GO:0034472	Up in Females
TRINITY_DN4977_c0_g1_i1	0.000237952	0.0347211	13	12	23	0	0	0	0	0	#N/A	#N/A	#N/A	GO:0051260	Up in Females
TRINITY_DN1466_c9_g1_i2	0.000532078	0.0477881	20.69	1.39	29.23	0	0	0	0	0	#N/A	#N/A	#N/A	GO:0006919	Up in Females
TRINITY_DN712_c0_g1_i11	0.000425253	0.0440858	2.64	17.85	29.97	0	0	0	0	0	#N/A	#N/A	#N/A	GO:0007165	Up in Females
TRINITY_DN3103_c1_g1_i12	0.000563447	0.0488922	42.43	8.67	0	2.12	0	0	0	0	#N/A	#N/A	#N/A	GO:0030683	Up in Females
TRINITY_DN1157_c0_g1_i11	0.000336779	0.0400779	31.2	3.4	21.01	0	0	0	0	0	#N/A	#N/A	#N/A	GO:0034605	Up in Females
TRINITY_DN24_c0_g1_i5	0.000452802	0.0451731	45.87	5.75	0	4.49	0	0	0	0	#N/A	#N/A	#N/A	GO:0018108	Up in Females
TRINITY_DN360_c0_g1_i18	0.000264777	0.0366686	0	16	30.23	7	0	0	0	0	#N/A	#N/A	#N/A	GO:0019083	Up in Females
TRINITY_DN10769_c0_g1_i1	0.000233282	0.0345475	0	11.36	14.29	28.3	0	0	0	0	#N/A	#N/A	#N/A	#N/A	Up in Females
TRINITY_DN11578_c0_g1_i1	0.000518543	0.0475454	0	10	10	8.39	0	0	0	0	#N/A	#N/A	#N/A	GO:0001555	Up in Females
TRINITY_DN25_c0_g1_i30	0.000373676	0.0417828	0	9.7	12.63	12.77	0	0	0	0	#N/A	#N/A	#N/A	GO:0007169	Up in Females
TRINITY_DN36986_c0_g1_i4	0.000352769	0.0409569	0	8	20.8	12	0	0	0	0	#N/A	#N/A	#N/A	GO:0050913	Up in Females
TRINITY_DN25_c0_g1_i20	0.000263275	0.0366686	0	24.12	31.8	4.57	0	0	0	0	#N/A	#N/A	#N/A	GO:0030154	Up in Females
TRINITY_DN3406_c0_g1_i18	0.000191057	0.031831	0	15.56	33.09	11.86	0	0	0	0	#N/A	#N/A	#N/A	GO:0060536	Up in Females
TRINITY_DN24_c0_g1_i6	5.91e-08	0.000200612	376.11	269.77	371.09	36.39	0	0	5.47	4	#N/A	#N/A	#N/A	GO:0018108	Up in Females
TRINITY_DN2406_c0_g1_i8	0.000149783	0.0290125	33.71	26.43	8.98	0	0	0	0	0	#N/A	#N/A	#N/A	GO:0032508	Up in Females
TRINITY_DN613_c1_g1_i4	0.00055191	0.0487307	6.14	0	1.06	54.2	0	0	0	0	#N/A	#N/A	#N/A	GO:0048846	Up in Females
TRINITY_DN24_c0_g1_i9	6.07e-05	0.0189523	225	86.59	128.49	0	0	0	2.9	0	#N/A	#N/A	#N/A	GO:0010951	Up in Females
TRINITY_DN3702_c0_g1_i35	8.37e-05	0.0228593	14.55	17.75	0	40.89	0	0	0	0	#N/A	#N/A	#N/A	GO:0015031	Up in Females
TRINITY_DN2543_c0_g1_i17	2.07e-06	0.00255693	20.47	21.1	10.68	27.88	0	0	0	0	#N/A	#N/A	#N/A	GO:0006511	Up in Females
TRINITY_DN3208_c0_g1_i20	0.000437362	0.0444309	0	51.16	32.34	0	0	0	0	0	#N/A	#N/A	#N/A	GO:0007155	Up in Females
TRINITY_DN19839_c0_g1_i12	0.000342423	0.0401756	48.85	42.69	0	0	0	0	0	0	#N/A	#N/A	#N/A	GO:0098671	Up in Females
TRINITY_DN11096_c0_g1_i8	0.00014026	0.028325	1.78	0	83.29	11.8	0	0	0	0	#N/A	#N/A	#N/A	GO:0009968	Up in Females
TRINITY_DN624_c0_g1_i15	0.000369169	0.0417828	87.89	14.75	0	0	0	0	0	0	#N/A	#N/A	#N/A	GO:0030097	Up in Females
TRINITY_DN73_c2_g1_i1	2.99e-05	0.0140221	52.28	30.94	0	13.33	0	0	0	0	#N/A	#N/A	#N/A	GO:0009617	Up in Females
TRINITY_DN3208_c0_g1_i16	0.000212633	0.0335788	0	62.88	42.81	0	0	0	0	0	#N/A	#N/A	#N/A	GO:0046718	Up in Females
TRINITY_DN12407_c0_g1_i6	0.000139459	0.028325	16	28	21	0	0	0	0	0	#N/A	#N/A	#N/A	GO:0046802	Up in Females
TRINITY_DN1380_c0_g1_i3	4e-05	0.0162722	13	61.76	0	16.53	0	0	0	0	#N/A	#N/A	#N/A	GO:0031122	Up in Females
TRINITY_DN356_c0_g1_i46	0.000204274	0.0328822	25.08	90.07	0	0	0	0	0	0	#N/A	#N/A	#N/A	GO:0006357	Up in Females
TRINITY_DN1617_c0_g1_i59	5.35e-06	0.00442408	78.35	10.57	1.02	35.56	0	0	0	0	#N/A	#N/A	#N/A	GO:0046688	Up in Females
TRINITY_DN11096_c0_g1_i9	0.000179668	0.0315021	0	0	121.93	21	0	0	0	0	#N/A	#N/A	#N/A	#N/A	Up in Females
TRINITY_DN963_c0_g1_i19	8.65e-06	0.00632421	0	28.08	47.75	58.54	0	0	0	0	#N/A	#N/A	#N/A	GO:0019221	Up in Females
TRINITY_DN103_c0_g1_i3	0.000175951	0.0313522	139.24	0	0	18.66	0	0	0	0	#N/A	#N/A	#N/A	GO:0006915	Up in Females
TRINITY_DN1765_c1_g2_i3	0.000128936	0.0277861	93.02	0	0	58.62	0	0	0	0	#N/A	#N/A	#N/A	GO:0030683	Up in Females
TRINITY_DN91_c0_g1_i7	9.04e-09	6.03e-05	293.11	109.5	55.45	135.88	0	0	0	1.42	#N/A	#N/A	#N/A	GO:0048367	Up in Females
TRINITY_DN21_c1_g1_i5	0.000122595	0.027416	114.16	0	0	59.05	0	0	0	0	#N/A	#N/A	#N/A	GO:0030683	Up in Females
TRINITY_DN191_c0_g1_i28	0.000129253	0.0277861	0	130.35	53.96	0	0	0	0	0	#N/A	#N/A	#N/A	GO:0039693	Up in Females
TRINITY_DN1807_c1_g1_i29	0.000134818	0.0282533	0	0	215.97	37.86	0	0	0	0	#N/A	#N/A	#N/A	GO:0007097	Up in Females
TRINITY_DN2561_c0_g1_i13	4.33e-06	0.00391276	156.26	0	52.29	74.69	0	0	0	0	#N/A	#N/A	#N/A	GO:0039503	Up in Females
TRINITY_DN2561_c0_g1_i29	1.69e-06	0.00225385	181.64	0	193.77	67.31	0	0	0	0	#N/A	#N/A	#N/A	GO:0031032	Up in Females
TRINITY_DN1619_c0_g1_i2	1.94e-08	9.6e-05	0	0	0	0	24.61	85.28	50.02	538.09	#N/A	#N/A	#N/A	GO:0016567	Up in Males
TRINITY_DN1380_c0_g1_i29	4.11e-07	0.000804992	0	0	0	0	170.88	0	315.93	313.73	#N/A	#N/A	#N/A	GO:0045893	Up in Males
TRINITY_DN34_c0_g1_i48	2.34e-06	0.00278988	0	0	0	0	0	48.56	34.74	906.65	#N/A	#N/A	#N/A	GO:0030466	Up in Males
TRINITY_DN343_c0_g1_i11	6.02e-08	0.000200612	0	0	0	0	2.85	63.09	122.09	951.8	#N/A	#N/A	#N/A	GO:0051701	Up in Males
TRINITY_DN1094_c0_g1_i8	1.96e-11	2.18e-07	0	0	0	0	65.78	169.74	222.34	724.76	#N/A	#N/A	#N/A	GO:0030335	Up in Males
TRINITY_DN23_c0_g2_i1	4.62e-11	3.84e-07	0	0	0	0	47.45	131.92	277.53	812.68	#N/A	#N/A	#N/A	GO:0007420	Up in Males
TRINITY_DN5947_c0_g1_i2	1e-12	1.67e-08	0	0	0	0	78	244	325.38	1197.95	#N/A	#N/A	#N/A	GO:0031589	Up in Males
TRINITY_DN84_c0_g1_i7	1.18e-17	3.92e-13	1	0	0	0	262	706.84	1167.07	8875.67	#N/A	#N/A	#N/A	GO:0042144	Up in Males
TRINITY_DN1086_c1_g1_i20	0.000334983	0.040007	5.72	3.63	2.09	0	22.17	24.9	92.06	97.98	#N/A	#N/A	#N/A	GO:0046740	Up in Males
TRINITY_DN4050_c0_g1_i8	0.000495408	0.0466314	1	1	1	1	8	8	21	63.1	#N/A	#N/A	#N/A	#N/A	Up in Males
TRINITY_DN1706_c0_g1_i1	0.000559979	0.0487307	7	3	7.88	7	90	43	4	528.13	#N/A	#N/A	#N/A	#N/A	Up in Males
TRINITY_DN863_c0_g1_i9	0.000323126	0.0397214	3.69	0	0	2.03	11.87	15.08	42.66	102.32	#N/A	#N/A	#N/A	GO:0046718	Up in Males
TRINITY_DN1996_c0_g1_i21	0.000164277	0.030466	0	0	2.2	2.3	13.15	12.7	50.11	84.96	#N/A	#N/A	#N/A	GO:0051259	Up in Males
TRINITY_DN9909_c0_g1_i7	0.000200736	0.0327956	0	1.16	3.35	0	6.34	24.8	44.95	75.02	#N/A	#N/A	#N/A	GO:0070233	Up in Males
TRINITY_DN5052_c0_g1_i12	0.000308003	0.0387281	4.56	0	0	1.55	6.07	24.4	121.49	71.28	#N/A	#N/A	#N/A	#N/A	Up in Males
TRINITY_DN21601_c0_g1_i6	0.000508359	0.0471839	1	0	1	0	5.99	6.51	31.11	36.64	#N/A	#N/A	#N/A	#N/A	Up in Males
TRINITY_DN7353_c0_g1_i4	5.48e-05	0.0177858	2.89	0	2.33	0	16.49	27.37	81.23	51.97	#N/A	#N/A	#N/A	GO:0007131	Up in Males
TRINITY_DN30018_c0_g1_i6	0.000522876	0.0475454	0	0	0	1	3.92	10.49	20.27	18.81	#N/A	#N/A	#N/A	GO:0030030	Up in Males
TRINITY_DN1136_c0_g1_i1	0.000499942	0.0469255	0	18.55	13.33	0	31.5	213	190.17	709.42	#N/A	#N/A	#N/A	GO:0016236	Up in Males
TRINITY_DN34_c0_g1_i69	0.000523669	0.0475454	1	0	0	0	7.43	4.54	11.67	29.02	#N/A	#N/A	#N/A	GO:0032880	Up in Males
TRINITY_DN1353_c0_g1_i6	0.000441721	0.0447171	0	0.07	0	0.65	2.96	7.64	20.76	15.38	#N/A	#N/A	#N/A	GO:0097502	Up in Males
TRINITY_DN5903_c0_g1_i37	0.000474409	0.0460868	0	0	0	0	4.16	2	5.26	5.5	#N/A	#N/A	#N/A	GO:0042117	Up in Males
TRINITY_DN12915_c1_g2_i1	0.000113786	0.025618	0	1	0	1	9	10	43	43.46	#N/A	#N/A	#N/A	GO:0009267	Up in Males
TRINITY_DN26875_c0_g1_i8	0.000331029	0.0399646	0	0	0	0.47	5.53	10.94	10.94	7.11	#N/A	#N/A	#N/A	GO:0046718	Up in Males
TRINITY_DN1062_c0_g1_i7	0.000526204	0.0475831	0	0	0	0	3	2.22	4.84	8.59	#N/A	#N/A	#N/A	#N/A	Up in Males
TRINITY_DN4534_c0_g1_i1	0.000363969	0.0415336	0	0	1	0	4	9	20	33.05	#N/A	#N/A	#N/A	#N/A	Up in Males
TRINITY_DN30865_c0_g1_i1	0.000469343	0.045728	0	1	0	0	2.32	12	27.96	28	#N/A	#N/A	#N/A	GO:0006281	Up in Males
TRINITY_DN2819_c0_g1_i12	2.67e-05	0.0133005	10.34	6	7.58	6	32.31	40.94	94.41	1358.35	#N/A	#N/A	#N/A	#N/A	Up in Males
TRINITY_DN5540_c0_g2_i2	2.85e-05	0.0135694	1	0	0	1	10.82	25	23.24	57	#N/A	#N/A	#N/A	GO:0042254	Up in Males
TRINITY_DN4790_c0_g1_i23	0.000402299	0.0428103	0	0	0	0	7.03	4.13	2.69	6.5	#N/A	#N/A	#N/A	GO:0071562	Up in Males
TRINITY_DN11723_c0_g1_i4	0.000461681	0.0456251	0	0	0	0	1.16	3	9.87	10.47	#N/A	#N/A	#N/A	GO:0015031	Up in Males
TRINITY_DN4078_c0_g2_i1	0.000381974	0.0425677	1	0	0	1	1	9	15	108	#N/A	#N/A	#N/A	#N/A	Up in Males
TRINITY_DN10625_c1_g1_i1	0.000333472	0.0399698	1	0	0	0	3	10	20	42	#N/A	#N/A	#N/A	GO:1902895	Up in Males
TRINITY_DN3932_c0_g1_i2	0.000221549	0.0340195	0	0	0	0	4.28	5.71	6.9	5.2	#N/A	#N/A	#N/A	GO:0019064	Up in Males
TRINITY_DN16201_c0_g1_i10	0.000446781	0.044841	0	0	0	0	1	4	14	7	#N/A	#N/A	#N/A	#N/A	Up in Males
TRINITY_DN1094_c0_g1_i20	4.63e-05	0.0177117	4.5	0	0	0	34.09	44.9	57.33	101.32	#N/A	#N/A	#N/A	GO:0009098	Up in Males
TRINITY_DN18671_c0_g2_i4	0.000317742	0.0392129	0	0	0	0	6.91	7	5.28	3.03	#N/A	#N/A	#N/A	GO:0007165	Up in Males
TRINITY_DN2102_c0_g1_i12	0.000218256	0.0338256	0	0	0	0	2.3	3.93	10.89	9.54	#N/A	#N/A	#N/A	GO:0045087	Up in Males
TRINITY_DN10802_c1_g3_i1	0.000257183	0.0364663	0	0	0	0	3	6	5	10	#N/A	#N/A	#N/A	GO:1905117	Up in Males
TRINITY_DN2824_c0_g1_i17	0.000431637	0.0441183	0	0	0	0	3.32	6.4	2.18	11.54	#N/A	#N/A	#N/A	GO:0000122	Up in Males
TRINITY_DN741_c0_g1_i44	0.000535685	0.0478489	0	0	0	0	1.23	3.46	4.9	17.34	#N/A	#N/A	#N/A	#N/A	Up in Males
TRINITY_DN8363_c0_g1_i1	0.000138613	0.028325	0	0	0	0	4.26	2.94	12.18	9.06	#N/A	#N/A	#N/A	GO:0007214	Up in Males
TRINITY_DN2160_c0_g1_i90	5.2e-05	0.0177117	1.1	0	0	0	16.68	22.75	29.67	13.29	#N/A	#N/A	#N/A	GO:0039644	Up in Males
TRINITY_DN34_c0_g1_i104	0.000144331	0.0287979	0	1.23	3.11	0	4.13	31.4	47.02	207.98	#N/A	#N/A	#N/A	GO:0030466	Up in Males
TRINITY_DN22805_c0_g1_i10	0.000271367	0.0366686	0	0	0	0	3	5.61	4	13.27	#N/A	#N/A	#N/A	#N/A	Up in Males
TRINITY_DN670_c78_g1_i1	0.000428176	0.0440858	0	0	0	0	2	1	16	13	#N/A	#N/A	#N/A	GO:0045861	Up in Males
TRINITY_DN597_c1_g1_i9	0.000220525	0.034019	0	0	0	0	4	2.35	7.24	14.96	#N/A	#N/A	#N/A	GO:0030683	Up in Males
TRINITY_DN8591_c0_g1_i6	0.000113551	0.025618	0	0	0	0	7	3.85	7.84	8.68	#N/A	#N/A	#N/A	GO:0039503	Up in Males
TRINITY_DN6925_c0_g1_i2	0.000534683	0.0478489	0	0	0	0	1	3	6	19.57	#N/A	#N/A	#N/A	#N/A	Up in Males
TRINITY_DN223_c0_g1_i48	0.000150631	0.0290125	0	0	0	0	4.64	6.1	5.7	10.54	#N/A	#N/A	#N/A	GO:0007165	Up in Males
TRINITY_DN15576_c0_g1_i8	9.52e-05	0.0234258	0	0	1	0	4.04	8.03	46.14	45.75	#N/A	#N/A	#N/A	#N/A	Up in Males
TRINITY_DN30018_c0_g1_i8	0.000466918	0.0456251	0	0	1.3	0	0	18.38	21.09	71.61	#N/A	#N/A	#N/A	GO:1902018	Up in Males
TRINITY_DN2852_c0_g1_i8	0.000391345	0.0426144	0	0	0	0	2	3.01	5.02	20.16	#N/A	#N/A	#N/A	#N/A	Up in Males
TRINITY_DN412_c0_g1_i22	0.000126018	0.0276253	0	1	1	0	5	9	11	141	#N/A	#N/A	#N/A	GO:1905515	Up in Males
TRINITY_DN332_c0_g1_i38	0.000106575	0.0248334	0	0	0	0	6	4	8.19	11.01	#N/A	#N/A	#N/A	GO:0045944	Up in Males
TRINITY_DN9002_c0_g1_i10	0.000107601	0.0248984	0	0	0	0	3.86	5.88	11.38	8.37	#N/A	#N/A	#N/A	GO:0005975	Up in Males
TRINITY_DN7439_c1_g1_i1	0.000340875	0.0401353	0	0	0	0	1	4	9	18	#N/A	#N/A	#N/A	GO:2000272	Up in Males
TRINITY_DN1306_c4_g1_i1	0.000226771	0.0341381	0	0	0	0	3	5	4.75	17	#N/A	#N/A	#N/A	GO:0007165	Up in Males
TRINITY_DN2963_c0_g1_i1	1.49e-06	0.00215297	3	1	10	2	33.92	115.64	319.22	666.07	#N/A	#N/A	#N/A	GO:0070986	Up in Males
TRINITY_DN9191_c0_g1_i5	0.000166653	0.030466	0	0	0	0	3.58	8.49	13.82	3.99	#N/A	#N/A	#N/A	#N/A	Up in Males
TRINITY_DN1535_c0_g1_i35	0.000280584	0.0366686	0	0	0	0	2.19	1.53	22.38	11.25	#N/A	#N/A	#N/A	GO:0043065	Up in Males
TRINITY_DN2370_c1_g1_i17	0.000519293	0.0475454	0	0	0	0	9	0	15	11	#N/A	#N/A	#N/A	#N/A	Up in Males
TRINITY_DN10204_c0_g2_i1	0.000228223	0.0341381	0	0	0	0	1	6	15	12	#N/A	#N/A	#N/A	#N/A	Up in Males
TRINITY_DN24_c13_g1_i2	9.35e-05	0.0234258	0	0	0	0	4	5	10.95	13	#N/A	#N/A	#N/A	GO:0002434	Up in Males
TRINITY_DN1770_c1_g1_i4	9.56e-05	0.0234258	0	0	0	0	3.68	6.49	16.03	7.38	#N/A	#N/A	#N/A	GO:0006355	Up in Males
TRINITY_DN914_c0_g1_i30	5.28e-05	0.0177117	1.66	0	0	0	15.37	9.55	11.24	112.86	#N/A	#N/A	#N/A	GO:0005979	Up in Males
TRINITY_DN10821_c1_g1_i11	9.4e-05	0.0234258	0	0	0	0	5	5.42	7.58	14.67	#N/A	#N/A	#N/A	#N/A	Up in Males
TRINITY_DN10219_c0_g1_i28	0.000402253	0.0428103	0	0	0	0	6.58	1.93	5.97	5.05	#N/A	#N/A	#N/A	GO:0044238	Up in Males
TRINITY_DN1099_c4_g2_i4	0.00040573	0.0428465	2.81	0	0	1.38	6.87	10.22	13.73	215.73	#N/A	#N/A	#N/A	GO:0043086	Up in Males
TRINITY_DN812_c0_g1_i4	4.73e-05	0.0177117	0	0	3.55	1.39	23.62	31.85	53.53	210.78	#N/A	#N/A	#N/A	GO:0045332	Up in Males
TRINITY_DN21601_c0_g1_i7	0.000303237	0.0383153	1	0	0	0	0	11.62	55.45	51.16	#N/A	#N/A	#N/A	#N/A	Up in Males
TRINITY_DN461_c2_g1_i7	0.000555479	0.0487307	0	0	0	0.05	15.82	0	10.72	12.35	#N/A	#N/A	#N/A	GO:0050896	Up in Males
TRINITY_DN6788_c0_g1_i13	9.08e-05	0.0234258	0	0.51	0	0	7.06	7.29	20.9	41.61	#N/A	#N/A	#N/A	GO:0018002	Up in Males
TRINITY_DN455_c2_g1_i9	0.000476469	0.0461524	0	0	0	0	10.6	0	20.16	8.26	#N/A	#N/A	#N/A	GO:0039573	Up in Males
TRINITY_DN19446_c2_g1_i1	0.000130602	0.0278961	0	0	0	0	2	6	13	15	#N/A	#N/A	#N/A	GO:0006388	Up in Males
TRINITY_DN1546_c0_g1_i4	0.000485461	0.0462359	0	0	0	0	6.16	0	16.76	16.89	#N/A	#N/A	#N/A	GO:0006278	Up in Males
TRINITY_DN36675_c0_g2_i1	0.00018665	0.031727	0	0	0	0	2	4	10	21	#N/A	#N/A	#N/A	#N/A	Up in Males
TRINITY_DN2311_c0_g2_i1	0.000446086	0.044841	0	0	0	0	9.32	0	20.65	10.4	#N/A	#N/A	#N/A	GO:0030435	Up in Males
TRINITY_DN1143_c0_g1_i11	5.12e-06	0.00437529	0	1.42	0	0	38.63	34.67	30.12	26.81	#N/A	#N/A	#N/A	GO:0090307	Up in Males
TRINITY_DN886_c0_g1_i36	0.000325438	0.0397214	0	0	1	0	1	3.55	14.39	103.23	#N/A	#N/A	#N/A	GO:0039503	Up in Males
TRINITY_DN4151_c0_g1_i10	0.000566823	0.0489232	0	0	0	0	0	11.13	15.39	8.75	#N/A	#N/A	#N/A	GO:0051607	Up in Males
TRINITY_DN3287_c2_g1_i1	0.00052694	0.0475831	0	0	0	0	4	0	24	16	#N/A	#N/A	#N/A	GO:0051321	Up in Males
TRINITY_DN2783_c0_g1_i22	0.000281118	0.0366686	0	0	0	1	16.61	40.93	52.3	0	#N/A	#N/A	#N/A	GO:0051301	Up in Males
TRINITY_DN13840_c0_g1_i1	5.3e-05	0.0177117	0	0	0	0	6	5	17	11	#N/A	#N/A	#N/A	#N/A	Up in Males
TRINITY_DN4151_c0_g2_i1	0.00052307	0.0475454	0	0	0	0	4.18	0	30.48	12.37	#N/A	#N/A	#N/A	GO:0034605	Up in Males
TRINITY_DN1826_c1_g1_i1	0.000169202	0.0306235	1	0	0	0	3	10.49	4.69	100.76	#N/A	#N/A	#N/A	GO:0051301	Up in Males
TRINITY_DN183_c0_g1_i5	4.65e-05	0.0177117	0	0	0	0.56	9.01	12.29	14.22	51.53	#N/A	#N/A	#N/A	GO:0044782	Up in Males
TRINITY_DN40930_c0_g1_i10	0.000416612	0.0436539	0	0	0	0	11.76	0	25	7.83	#N/A	#N/A	#N/A	GO:0019835	Up in Males
TRINITY_DN7420_c0_g2_i1	1.52e-07	0.000393927	3	2	2	2	31	107	325	403	#N/A	#N/A	#N/A	GO:0090136	Up in Males
TRINITY_DN6544_c0_g1_i67	7.52e-05	0.0216155	0	0	0	0	8.84	9.01	5.49	11.69	#N/A	#N/A	#N/A	GO:0007186	Up in Males
TRINITY_DN1613_c1_g1_i1	7.96e-05	0.0223508	0	0	0	0	5	9	21	5	#N/A	#N/A	#N/A	GO:0036460	Up in Males
TRINITY_DN662_c0_g1_i15	0.000484293	0.0462359	0	0	0	0	13.67	0	7.31	19.28	#N/A	#N/A	#N/A	GO:0019076	Up in Males
TRINITY_DN10821_c3_g1_i4	6.35e-05	0.0194262	0	0	0	0	5	11	11	10	#N/A	#N/A	#N/A	GO:0034605	Up in Males
TRINITY_DN5059_c0_g1_i18	0.000553811	0.0487307	0	0	0	0	0	5.45	10.93	25.94	#N/A	#N/A	#N/A	GO:0000281	Up in Males
TRINITY_DN20875_c1_g1_i1	0.000433247	0.0441475	0	0	0	0	1	2	7	34	#N/A	#N/A	#N/A	GO:0009267	Up in Males
TRINITY_DN182_c0_g1_i16	5.84e-05	0.0185425	0	0	0	0	4.36	10.48	13.74	10.6	#N/A	#N/A	#N/A	#N/A	Up in Males
TRINITY_DN2852_c0_g1_i4	0.000396769	0.0426475	0	0	0	0	1	6.18	3	31.03	#N/A	#N/A	#N/A	#N/A	Up in Males
TRINITY_DN8990_c0_g1_i2	0.000459212	0.0455399	0	0	0	0	1.36	1.66	5.36	36.59	#N/A	#N/A	#N/A	#N/A	Up in Males
TRINITY_DN2963_c0_g1_i5	8.05e-05	0.0223508	0	0	0	0	5.12	7.92	6.52	20.25	#N/A	#N/A	#N/A	GO:2001222	Up in Males
TRINITY_DN8672_c0_g1_i81	0.000556134	0.0487307	0.01	0	0	0	0	8.31	36.2	6.1	#N/A	#N/A	#N/A	GO:0071897	Up in Males
TRINITY_DN1981_c0_g1_i21	0.000408406	0.042929	0	0	0	0	7.35	0	13.93	27.06	#N/A	#N/A	#N/A	GO:1900245	Up in Males
TRINITY_DN5924_c1_g1_i11	0.000338264	0.0401114	0	0	0	0	17	0	13	17	#N/A	#N/A	#N/A	GO:0007417	Up in Males
TRINITY_DN1793_c0_g1_i20	0.00046375	0.0456251	0	0	0	0	0	13.3	27.87	6.55	#N/A	#N/A	#N/A	GO:0006665	Up in Males
TRINITY_DN47492_c0_g1_i2	0.000423302	0.0440776	0	1	0	0	52.79	0	2.02	96.7	#N/A	#N/A	#N/A	#N/A	Up in Males
TRINITY_DN863_c0_g1_i20	0.000180217	0.0315021	0	0	0	0	1.91	4.05	8.99	36.85	#N/A	#N/A	#N/A	GO:0050982	Up in Males
TRINITY_DN3752_c2_g2_i2	0.000281719	0.0366686	0	0	0	0	1	3	9	41	#N/A	#N/A	#N/A	GO:0039657	Up in Males
TRINITY_DN5272_c1_g1_i1	0.000103705	0.0245075	0	0	0	0	3.8	1.82	27.28	25.88	#N/A	#N/A	#N/A	GO:0006406	Up in Males
TRINITY_DN784_c0_g1_i8	0.000383743	0.0426071	0	0	0	0	0	11	10.68	28.08	#N/A	#N/A	#N/A	GO:0030420	Up in Males
TRINITY_DN3517_c0_g1_i5	0.000388721	0.0426071	0	0	0	0	14.46	14.33	16.06	0	#N/A	#N/A	#N/A	GO:0035076	Up in Males
TRINITY_DN7096_c0_g1_i7	7.88e-05	0.0223508	0	0	0	0	3	8	10	30.87	#N/A	#N/A	#N/A	#N/A	Up in Males
TRINITY_DN1086_c1_g1_i12	0.00033948	0.0401128	0.18	0	0	0	0	7.3	50.38	27.59	#N/A	#N/A	#N/A	#N/A	Up in Males
TRINITY_DN3096_c0_g1_i8	0.000403422	0.0428103	0	0	0	0	0	5.35	16.03	35.55	#N/A	#N/A	#N/A	GO:0007286	Up in Males
TRINITY_DN9082_c0_g1_i1	0.000300048	0.0383061	0	0	0	0	0	9	24.47	23	#N/A	#N/A	#N/A	GO:0000750	Up in Males
TRINITY_DN7468_c0_g1_i4	0.000134596	0.0282533	0	0	0	0	2.42	3	13.92	38	#N/A	#N/A	#N/A	GO:0002949	Up in Males
TRINITY_DN1851_c0_g1_i65	4e-05	0.0162722	0	0	0	0	14.56	8.64	24.94	4.92	#N/A	#N/A	#N/A	GO:0000079	Up in Males
TRINITY_DN5013_c1_g1_i22	0.000427907	0.0440858	0	0	0	0	0	4.75	52.23	10.96	#N/A	#N/A	#N/A	GO:0006915	Up in Males
TRINITY_DN741_c0_g1_i76	0.000550949	0.0487307	0	0	0	0	4.09	14.69	0	27.89	#N/A	#N/A	#N/A	#N/A	Up in Males
TRINITY_DN34_c0_g1_i62	0.000391301	0.0426144	0	0	0	0	3.36	0	43.27	21.81	#N/A	#N/A	#N/A	GO:0030466	Up in Males
TRINITY_DN23639_c0_g1_i32	5.04e-05	0.0177117	0	0	0	0	2.63	11.97	24.19	16.67	#N/A	#N/A	#N/A	GO:0030435	Up in Males
TRINITY_DN5426_c0_g1_i6	0.000488742	0.0462359	0	0	0	0	0	2.3	49.39	18.43	#N/A	#N/A	#N/A	GO:0006260	Up in Males
TRINITY_DN3639_c2_g1_i1	0.000153689	0.0292632	0	0	0	0	4	5	4	43	#N/A	#N/A	#N/A	#N/A	Up in Males
TRINITY_DN3245_c0_g1_i25	0.000272867	0.0366686	0	0	0	0	0	12	28.42	17.97	#N/A	#N/A	#N/A	GO:0043065	Up in Males
TRINITY_DN375_c0_g1_i2	0.000273412	0.0366686	0	0	0	0	1	2.56	9.59	47.9	#N/A	#N/A	#N/A	#N/A	Up in Males
TRINITY_DN5052_c0_g1_i10	2.6e-05	0.0131064	0	0	0	0	7.87	12	25.75	10.53	#N/A	#N/A	#N/A	#N/A	Up in Males
TRINITY_DN1416_c3_g1_i4	4.2e-05	0.0168534	0	0	0	0	13.35	2.75	17.16	25.83	#N/A	#N/A	#N/A	GO:1905117	Up in Males
TRINITY_DN4488_c0_g1_i33	0.000231509	0.0344379	0	0	0	0	21	0	25	15.25	#N/A	#N/A	#N/A	GO:0006897	Up in Males
TRINITY_DN914_c0_g1_i22	0.000103181	0.0245075	0	0	0	0	1.14	10.55	14.72	31.7	#N/A	#N/A	#N/A	GO:0036462	Up in Males
TRINITY_DN2804_c0_g1_i10	0.000373461	0.0417828	0	0	0	0	4.77	0	59.23	12.35	#N/A	#N/A	#N/A	GO:0006310	Up in Males
TRINITY_DN6592_c0_g1_i6	0.000537063	0.0478489	0	0	0	0	0	15	46.51	2.36	#N/A	#N/A	#N/A	GO:0042330	Up in Males
TRINITY_DN4416_c1_g1_i1	0.000238622	0.0347211	0	0	0	0	17	0	40	11	#N/A	#N/A	#N/A	GO:0032114	Up in Males
TRINITY_DN10869_c0_g1_i36	0.000355856	0.0409897	0	0	0	0	28.51	0	6.24	21.73	#N/A	#N/A	#N/A	GO:0046718	Up in Males
TRINITY_DN1817_c0_g1_i1	0.000247088	0.0356416	0	0	0	0	0	11	33.29	20.46	#N/A	#N/A	#N/A	GO:0050912	Up in Males
TRINITY_DN5331_c0_g2_i6	0.000180574	0.0315021	0	0	0	0	1	6	9	46	#N/A	#N/A	#N/A	GO:0050896	Up in Males
TRINITY_DN6841_c0_g1_i18	0.000249036	0.0356783	0	0	0	0.19	27	17	0	26.78	#N/A	#N/A	#N/A	GO:0030683	Up in Males
TRINITY_DN8395_c0_g1_i18	0.000402799	0.0428103	0	0	0	0	12	7	0	37	#N/A	#N/A	#N/A	GO:0002119	Up in Males
TRINITY_DN3038_c0_g1_i1	0.000392798	0.0426333	0	0	0	0	12.05	21	0	13.13	#N/A	#N/A	#N/A	GO:0031640	Up in Males
TRINITY_DN22447_c0_g1_i1	0.000558678	0.0487307	0	0	0	0	23	2	0	32	#N/A	#N/A	#N/A	GO:0010951	Up in Males
TRINITY_DN4518_c0_g1_i10	0.000329745	0.0399543	0	0	0	0	0	16.88	8.23	31.7	#N/A	#N/A	#N/A	GO:0019083	Up in Males
TRINITY_DN3476_c0_g1_i9	8.17e-05	0.0224941	0	0	0	0	3.1	9.69	7.07	41.08	#N/A	#N/A	#N/A	GO:1904667	Up in Males
TRINITY_DN25042_c0_g1_i7	0.000273056	0.0366686	0	0	0	0	8	0	17.97	44	#N/A	#N/A	#N/A	GO:0070197	Up in Males
TRINITY_DN30567_c0_g1_i8	0.000549064	0.0487307	0	0	0	0	40.59	6.33	6.02	0	#N/A	#N/A	#N/A	#N/A	Up in Males
TRINITY_DN1086_c1_g1_i2	4.53e-05	0.0177117	0	0	0	0	4.35	4.19	45.79	21.93	#N/A	#N/A	#N/A	#N/A	Up in Males
TRINITY_DN30018_c0_g1_i13	0.000489819	0.0462359	0	0	0	0	0	5.96	5.98	54.68	#N/A	#N/A	#N/A	GO:1902018	Up in Males
TRINITY_DN8247_c0_g1_i1	2.78e-05	0.0134979	0	0	0	0	25.59	6.43	11.51	17.41	#N/A	#N/A	#N/A	GO:0031640	Up in Males
TRINITY_DN32137_c0_g2_i6	0.000581792	0.0495358	0	0	0	0	38.39	2	0	16.9	#N/A	#N/A	#N/A	#N/A	Up in Males
TRINITY_DN34_c0_g1_i39	3.92e-05	0.0162722	0	0	0	0	9.1	8.39	8.01	38.74	#N/A	#N/A	#N/A	GO:0030466	Up in Males
TRINITY_DN5975_c0_g1_i3	0.000215776	0.0337553	0	0	0	0	0	9.64	40.13	26	#N/A	#N/A	#N/A	GO:0044010	Up in Males
TRINITY_DN1952_c0_g1_i25	1.58e-05	0.00899701	0	0	0	0	12.84	12.18	16.01	22.89	#N/A	#N/A	#N/A	GO:0002230	Up in Males
TRINITY_DN8149_c1_g1_i2	0.000236938	0.0347211	0	0	0	0	0	18.29	16.24	29.05	#N/A	#N/A	#N/A	GO:0098003	Up in Males
TRINITY_DN1512_c2_g1_i8	0.000505975	0.0471839	0	0	0	0	0	9.22	15.33	12.16	#N/A	#N/A	#N/A	GO:0061512	Up in Males
TRINITY_DN3433_c0_g1_i10	8.68e-05	0.0229459	0	0	0	0	7	4.61	6.73	17.94	#N/A	#N/A	#N/A	#N/A	Up in Males
TRINITY_DN6989_c0_g3_i2	0.000124502	0.0274737	0	0	0	0	2.49	3.87	13.07	24.84	#N/A	#N/A	#N/A	GO:0007010	Up in Males
TRINITY_DN5212_c1_g1_i10	0.00052159	0.0475454	0	0	0	0	0	4.8	13.43	26.81	#N/A	#N/A	#N/A	#N/A	Up in Males
TRINITY_DN105758_c0_g1_i1	8.68e-05	0.0229459	0	0	0	0	3	4	26	15	#N/A	#N/A	#N/A	GO:0009399	Up in Males
TRINITY_DN5635_c0_g1_i8	0.000442863	0.0447171	0	0	0	0	0	13.54	10.57	17.52	#N/A	#N/A	#N/A	GO:0032121	Up in Males
TRINITY_DN7664_c0_g1_i10	4.79e-05	0.0177117	0	0	0	0	5.8	10.09	25.57	7.44	#N/A	#N/A	#N/A	GO:0051726	Up in Males
TRINITY_DN1745_c2_g1_i11	0.000269968	0.0366686	0	0	0	0	17.32	0	25.54	12.72	#N/A	#N/A	#N/A	GO:0048260	Up in Males
TRINITY_DN20450_c0_g1_i7	0.000395718	0.0426475	0	0	0	0	13.34	11	0	22.24	#N/A	#N/A	#N/A	GO:0006310	Up in Males
TRINITY_DN3468_c0_g1_i6	0.000316664	0.0392129	0	0	0	0	9.41	0	11.34	44.81	#N/A	#N/A	#N/A	GO:0016925	Up in Males
TRINITY_DN741_c0_g1_i21	5.4e-05	0.0177858	0	0	0	0	6.04	9.41	7	40.52	#N/A	#N/A	#N/A	GO:0006811	Up in Males
TRINITY_DN12292_c0_g1_i9	0.00030357	0.0383153	0	0	0	0	0	28.14	19.13	10.48	#N/A	#N/A	#N/A	GO:0000165	Up in Males
TRINITY_DN15216_c0_g1_i5	0.000185182	0.031727	0	0	0	0	9.93	0	46.01	26.79	#N/A	#N/A	#N/A	GO:0039554	Up in Males
TRINITY_DN15831_c0_g4_i1	0.000162197	0.030466	0	0	0	0	24	0	33	19	#N/A	#N/A	#N/A	GO:0039573	Up in Males
TRINITY_DN8903_c0_g1_i24	0.000565833	0.0489232	0	0.1	0	0	52.74	0.74	28.65	0	#N/A	#N/A	#N/A	GO:0006955	Up in Males
TRINITY_DN3263_c0_g1_i14	0.000281195	0.0366686	0	0	0	0	0	4.87	22.59	51.12	#N/A	#N/A	#N/A	GO:0061512	Up in Males
TRINITY_DN2491_c0_g1_i5	3.45e-06	0.00338102	1	0	0	0	14	25.32	29.19	151.23	#N/A	#N/A	#N/A	GO:0039503	Up in Males
TRINITY_DN60686_c0_g1_i1	0.000582668	0.0495358	0	0	0	0	36	1	0	28	#N/A	#N/A	#N/A	GO:0045944	Up in Males
TRINITY_DN3476_c0_g1_i7	0.00029669	0.0380231	0	0	0	0	0.61	1.8	9.29	66.91	#N/A	#N/A	#N/A	GO:1904667	Up in Males
TRINITY_DN2543_c0_g1_i15	0.000142394	0.0285826	0	0	0	0	17.15	0	31.48	31.68	#N/A	#N/A	#N/A	GO:0006511	Up in Males
TRINITY_DN34981_c0_g1_i1	0.000580406	0.0495358	0	0	0	0	40	1	0	24	#N/A	#N/A	#N/A	GO:0005975	Up in Males
TRINITY_DN886_c0_g1_i29	7.39e-05	0.0214118	0	0	0	0	1.9	3.47	31.2	47.38	#N/A	#N/A	#N/A	GO:0007283	Up in Males
TRINITY_DN360_c0_g1_i50	0.000249483	0.0356783	0	0	0	0	6.03	21.35	48.25	0	#N/A	#N/A	#N/A	GO:0032757	Up in Males
TRINITY_DN3571_c0_g1_i5	0.00016732	0.030466	0	0	0	0	0	16.2	20.31	38.73	#N/A	#N/A	#N/A	GO:0001172	Up in Males
TRINITY_DN11570_c0_g1_i2	0.000574062	0.0492998	0	0	0	0	0	30.56	1	28.44	#N/A	#N/A	#N/A	#N/A	Up in Males
TRINITY_DN9588_c0_g1_i1	0.000294798	0.0379264	0	0	0	0	0	14.17	73.54	3.85	#N/A	#N/A	#N/A	GO:0046718	Up in Males
TRINITY_DN6544_c0_g1_i39	0.000133254	0.0282533	0	0	0	0	0	16.24	42.22	24.9	#N/A	#N/A	#N/A	GO:0007186	Up in Males
TRINITY_DN118796_c0_g1_i1	0.000352548	0.0409569	2	0	0	9	1335	8	0	544	#N/A	#N/A	#N/A	GO:0045299	Up in Males
TRINITY_DN825_c0_g1_i13	0.000157282	0.0297771	0	0	0	0	33.33	22.06	1.76	1.87	#N/A	#N/A	#N/A	GO:0046326	Up in Males
TRINITY_DN5052_c0_g1_i6	0.000128364	0.0277861	0	0	0	0	0	12.5	49.54	27.28	#N/A	#N/A	#N/A	#N/A	Up in Males
TRINITY_DN7990_c0_g1_i20	0.000275915	0.0366686	1	0	0	0	137.99	2	0	76	#N/A	#N/A	#N/A	GO:0042783	Up in Males
TRINITY_DN1087_c6_g1_i4	3.9e-05	0.0162722	0	0	0	0	5.01	3	24.71	56.17	#N/A	#N/A	#N/A	#N/A	Up in Males
TRINITY_DN49655_c0_g1_i1	0.000507219	0.0471839	0	0	0	0	52	1	0	17	#N/A	#N/A	#N/A	GO:0010192	Up in Males
TRINITY_DN2963_c0_g1_i2	1.31e-05	0.00790221	0	0	0	0	9.96	11.44	13.76	44.42	#N/A	#N/A	#N/A	GO:0007411	Up in Males
TRINITY_DN3263_c0_g1_i11	0.000209115	0.0331806	0	0	0	0	0	16.78	7.98	52.68	#N/A	#N/A	#N/A	GO:0032543	Up in Males
TRINITY_DN412_c0_g1_i1	0.000147514	0.0290125	0	0	0	0	1	5	6	74	#N/A	#N/A	#N/A	GO:0035556	Up in Males
TRINITY_DN2516_c0_g1_i1	0.000309534	0.0387743	1	0	0	8	1165	12	0	468	#N/A	#N/A	#N/A	GO:0051495	Up in Males
TRINITY_DN6509_c0_g2_i2	0.000458091	0.0455399	0	0	0	0	1	34.43	0	28.83	#N/A	#N/A	#N/A	#N/A	Up in Males
TRINITY_DN12292_c0_g1_i11	9.44e-05	0.0234258	0	0	0	0	0	18.45	34.98	33.13	#N/A	#N/A	#N/A	GO:0019058	Up in Males
TRINITY_DN886_c0_g1_i16	0.000227504	0.0341381	0	0	0	0	0	4.42	13.67	73.78	#N/A	#N/A	#N/A	GO:0010951	Up in Males
TRINITY_DN8150_c0_g1_i6	0.000123615	0.0274599	0	0	0	0	0	10.02	19.91	62	#N/A	#N/A	#N/A	GO:0090307	Up in Males
TRINITY_DN8012_c0_g1_i6	0.000163672	0.030466	0	0	0	0	0	10.8	10.16	68.22	#N/A	#N/A	#N/A	GO:0042255	Up in Males
TRINITY_DN1256_c0_g1_i46	0.000205353	0.032892	0	0	0	0	12.4	0	4.76	75.91	#N/A	#N/A	#N/A	GO:0016925	Up in Males
TRINITY_DN5164_c0_g1_i2	0.000464282	0.0456251	0	0	0	0.5	0	0	57.17	164.11	#N/A	#N/A	#N/A	GO:0051301	Up in Males
TRINITY_DN34_c0_g1_i84	9.84e-05	0.0239448	0	0	0	0	0	7.55	41.19	52.56	#N/A	#N/A	#N/A	GO:0007218	Up in Males
TRINITY_DN105626_c0_g1_i1	0.000279281	0.0366686	0	0	0	0	60	2	0	16	#N/A	#N/A	#N/A	GO:0045299	Up in Males
TRINITY_DN42902_c0_g1_i15	0.000206309	0.032892	0	0	0	0	53.58	3	0	23.33	#N/A	#N/A	#N/A	#N/A	Up in Males
TRINITY_DN7050_c0_g1_i11	7.55e-06	0.00584689	0	0	0	0	8	5.39	34.77	55.22	#N/A	#N/A	#N/A	GO:0006974	Up in Males
TRINITY_DN18096_c0_g1_i4	9.21e-05	0.0234258	0	0	0	0	35	16.57	0	26.44	#N/A	#N/A	#N/A	GO:0019042	Up in Males
TRINITY_DN3476_c0_g1_i2	2.8e-05	0.0134979	0	0	0	0	2.71	8.13	11.89	75.17	#N/A	#N/A	#N/A	GO:0016050	Up in Males
TRINITY_DN15516_c2_g1_i1	0.000186752	0.031727	0	0	0	0	56.67	2.99	0	22.42	#N/A	#N/A	#N/A	GO:0045333	Up in Males
TRINITY_DN2523_c1_g1_i9	0.000264978	0.0366686	0	0	0	0	0	5.47	3.27	91.03	#N/A	#N/A	#N/A	GO:0006355	Up in Males
TRINITY_DN2452_c0_g1_i13	6.8e-05	0.0202236	0	0	0.39	0	0	13.93	16.87	150.81	#N/A	#N/A	#N/A	GO:0007051	Up in Males
TRINITY_DN3096_c0_g1_i9	3.75e-06	0.00357331	0	0	0	0	5.12	19.81	41.06	33.03	#N/A	#N/A	#N/A	GO:0001503	Up in Males
TRINITY_DN14645_c0_g1_i16	6.09e-05	0.0189523	0	0	0	0	21	22.84	50.17	0	#N/A	#N/A	#N/A	GO:0043161	Up in Males
TRINITY_DN377_c0_g1_i3	2.58e-05	0.0131064	0	0	0	2.65	5.24	8.19	669.67	261.77	#N/A	#N/A	#N/A	#N/A	Up in Males
TRINITY_DN343_c0_g1_i17	1.13e-05	0.00725933	0	0	0	0	17.52	2.78	12.04	72.56	#N/A	#N/A	#N/A	GO:0035556	Up in Males
TRINITY_DN5164_c0_g1_i1	7.49e-06	0.00584689	0	0	0	0.5	18	37	3.83	143.89	#N/A	#N/A	#N/A	GO:0051301	Up in Males
TRINITY_DN15536_c0_g1_i2	3.99e-05	0.0162722	0	0	0	0	0	31.99	36.23	28.59	#N/A	#N/A	#N/A	GO:0006986	Up in Males
TRINITY_DN11048_c0_g1_i1	0.000149416	0.0290125	0	0	0	0	2	38	0	44	#N/A	#N/A	#N/A	#N/A	Up in Males
TRINITY_DN377_c0_g1_i6	1.59e-05	0.00899701	0	0	0	1.35	3.87	8.52	411.9	148.34	#N/A	#N/A	#N/A	#N/A	Up in Males
TRINITY_DN7141_c0_g1_i2	0.000105411	0.0247353	0	0	0	0	5.54	0	10.52	100.36	#N/A	#N/A	#N/A	GO:0030154	Up in Males
TRINITY_DN118339_c0_g1_i1	0.000370775	0.0417828	0	0	0	0	40	0	0	63	#N/A	#N/A	#N/A	GO:0030420	Up in Males
TRINITY_DN3769_c0_g1_i4	0.000529903	0.0477213	0	0	0	0	0	5.54	143.81	0	#N/A	#N/A	#N/A	GO:0046718	Up in Males
TRINITY_DN13399_c0_g1_i24	0.000451885	0.0451731	0	0	0	0	0	55.23	26.98	0	#N/A	#N/A	#N/A	GO:0050790	Up in Males
TRINITY_DN6877_c0_g1_i9	0.00036044	0.0412723	0	0	0	0	45.73	0	0	56.46	#N/A	#N/A	#N/A	GO:0010951	Up in Males
TRINITY_DN1826_c1_g1_i5	1.05e-05	0.00712609	0	0	0	0	3.01	7.09	19.91	88.17	#N/A	#N/A	#N/A	GO:0051301	Up in Males
TRINITY_DN84_c0_g1_i3	0.000371091	0.0417828	0	0	0	0	0	0	17.93	107.38	#N/A	#N/A	#N/A	GO:0042144	Up in Males
TRINITY_DN4526_c1_g2_i9	0.000356742	0.0409897	0	0	0	0	67.67	0	0	31.5	#N/A	#N/A	#N/A	GO:0045299	Up in Males
TRINITY_DN47492_c0_g1_i1	6.22e-05	0.0191922	0	0	0	0	7.61	61	1.03	4.98	#N/A	#N/A	#N/A	#N/A	Up in Males
TRINITY_DN4529_c0_g1_i17	0.000110517	0.0252227	0	0	0	0	47.14	0	79.6	1.11	#N/A	#N/A	#N/A	GO:0042592	Up in Males
TRINITY_DN4427_c0_g1_i9	0.000350072	0.0409289	0	0	0	0	71.2	0	0	30.09	#N/A	#N/A	#N/A	GO:1904667	Up in Males
TRINITY_DN12036_c0_g1_i2	9.32e-05	0.0234258	0	0	0	0	46.47	2	0	60.3	#N/A	#N/A	#N/A	GO:1905907	Up in Males
TRINITY_DN863_c0_g1_i18	8.23e-06	0.00623322	0	0	0	0	1.3	19.96	22.91	72.2	#N/A	#N/A	#N/A	GO:0070588	Up in Males
TRINITY_DN25751_c0_g1_i1	0.000139364	0.028325	0	0	0	0	71	1	0	31	#N/A	#N/A	#N/A	#N/A	Up in Males
TRINITY_DN93791_c0_g1_i1	0.000314124	0.039164	0	0	0	0	71	0	0	34	#N/A	#N/A	#N/A	GO:0048367	Up in Males
TRINITY_DN135141_c0_g1_i1	9.99e-05	0.0239488	0	0	0	0	71	2	0	31	#N/A	#N/A	#N/A	GO:0006487	Up in Males
TRINITY_DN16622_c0_g1_i1	0.000177176	0.0314025	0	0	0	0	62.65	0.33	0	46.41	#N/A	#N/A	#N/A	#N/A	Up in Males
TRINITY_DN2922_c0_g1_i2	0.000281001	0.0366686	0	0	0	0	61.41	0	0	48.74	#N/A	#N/A	#N/A	#N/A	Up in Males
TRINITY_DN8572_c0_g1_i1	0.000228297	0.0341381	0	0	0	1	273	2	0	81	#N/A	#N/A	#N/A	GO:0010951	Up in Males
TRINITY_DN3690_c0_g1_i19	0.000173054	0.0310018	0	0	0	0	0.37	27.6	0	86.81	#N/A	#N/A	#N/A	GO:0045672	Up in Males
TRINITY_DN1419_c0_g1_i1	0.000181928	0.031573	0	0	0	0	0	2.69	2.51	129.22	#N/A	#N/A	#N/A	GO:0034472	Up in Males
TRINITY_DN3664_c0_g1_i29	0.000325392	0.0397214	0	0	0	0	0	15.27	0	109.48	#N/A	#N/A	#N/A	GO:0031509	Up in Males
TRINITY_DN9611_c0_g1_i5	8.73e-06	0.00632421	1	0	0	0	2.42	36.61	49.23	315.5	#N/A	#N/A	#N/A	GO:0019319	Up in Males
TRINITY_DN83848_c0_g1_i1	7.99e-05	0.0223508	2	0	0	17	3689	64	0	1578	#N/A	#N/A	#N/A	#N/A	Up in Males
TRINITY_DN97442_c0_g1_i1	0.000280673	0.0366686	0	0	0	0	84	0	0	28	#N/A	#N/A	#N/A	GO:0010214	Up in Males
TRINITY_DN119844_c0_g1_i1	0.000272527	0.0366686	0	0	0	0	82	0	0	31	#N/A	#N/A	#N/A	GO:0046718	Up in Males
TRINITY_DN412_c0_g1_i7	0.000466715	0.0456251	0	0	0	0	0	3.83	0	133.43	#N/A	#N/A	#N/A	GO:0000165	Up in Males
TRINITY_DN4669_c0_g1_i1	2.62e-06	0.00299688	0	0	0	0	6	8.53	26.71	97.42	#N/A	#N/A	#N/A	GO:0030466	Up in Males
TRINITY_DN3878_c0_g1_i9	1.89e-06	0.002422	0	0	0	0	3.09	18.33	38.79	77.02	#N/A	#N/A	#N/A	GO:0061512	Up in Males
TRINITY_DN34_c0_g1_i51	3.65e-07	0.00075999	0	0	0	0	21.39	19.71	20.6	64.19	#N/A	#N/A	#N/A	GO:0045944	Up in Males
TRINITY_DN7441_c0_g1_i9	0.000286956	0.0372009	0	0	0	0	0	16.75	0	116.48	#N/A	#N/A	#N/A	GO:0030683	Up in Males
TRINITY_DN5712_c0_g1_i10	1.26e-05	0.00777302	0	0	0	0	9.89	13.24	49.03	11.27	#N/A	#N/A	#N/A	GO:1904823	Up in Males
TRINITY_DN2467_c0_g1_i1	3.65e-05	0.0159852	0	0	0	0	2	8	27	51	#N/A	#N/A	#N/A	#N/A	Up in Males
TRINITY_DN12832_c0_g1_i18	2.27e-05	0.0120264	0	0	0	0	5	4.36	12.45	82.26	#N/A	#N/A	#N/A	GO:0001580	Up in Males
TRINITY_DN23193_c0_g2_i4	3.47e-05	0.015438	0	0	0	0	11	0	50	63.1	#N/A	#N/A	#N/A	GO:0016032	Up in Males
TRINITY_DN11570_c0_g1_i1	0.000226412	0.0341381	0	0	0	0	0	44.03	0	75.66	#N/A	#N/A	#N/A	#N/A	Up in Males
TRINITY_DN4427_c0_g1_i8	0.000202752	0.0327956	0	0	0	0	44.65	0	0	95.65	#N/A	#N/A	#N/A	GO:0009792	Up in Males
TRINITY_DN21915_c0_g1_i1	2.43e-05	0.0126511	0	0	0	0	1	1	150	42	#N/A	#N/A	#N/A	GO:0018120	Up in Males
TRINITY_DN61933_c0_g1_i1	0.000214781	0.0337553	0	0	0	0	88	0	0	41	#N/A	#N/A	#N/A	GO:0009267	Up in Males
TRINITY_DN25_c0_g1_i28	1.33e-05	0.00790221	0	0	0	0	0	22.48	39.77	89.74	#N/A	#N/A	#N/A	GO:0030154	Up in Males
TRINITY_DN11522_c0_g1_i2	5.62e-05	0.0180016	0	0	0	0	73.79	2	0	59	#N/A	ATPA1_ACAM1	#N/A	GO:0032774	Up in Males
TRINITY_DN34_c0_g1_i85	8.62e-07	0.00143533	0	0	0	0	5.07	24.98	31.69	86.79	#N/A	#N/A	#N/A	GO:0050790	Up in Males
TRINITY_DN6640_c0_g1_i5	1.13e-06	0.00178728	0	0	0	0	7.79	9.04	37.5	108.92	#N/A	#N/A	#N/A	GO:0000711	Up in Males
TRINITY_DN14645_c0_g1_i17	0.000153286	0.0292632	0	0	0	0	0	0	64.74	115.92	#N/A	#N/A	#N/A	GO:2000272	Up in Males
TRINITY_DN14645_c0_g1_i13	0.000190485	0.031831	0	0	0	0	0	63.16	71.8	0	#N/A	#N/A	#N/A	GO:0016567	Up in Males
TRINITY_DN580_c0_g1_i33	3.18e-05	0.0145241	0	0	0	0	0	10.85	15.81	135.23	#N/A	#N/A	#N/A	GO:0009968	Up in Males
TRINITY_DN1907_c0_g1_i7	1.82e-05	0.0100995	0	0	0	0	0	13.59	32.98	119.48	#N/A	#N/A	#N/A	GO:0045040	Up in Males
TRINITY_DN4819_c0_g2_i1	0.000201016	0.0327956	0	0	0	0	98	0	0	40	#N/A	#N/A	#N/A	GO:0051321	Up in Males
TRINITY_DN4819_c0_g1_i1	9.52e-05	0.0234258	0	0	0	0	111	1	0	24	#N/A	#N/A	#N/A	GO:0030435	Up in Males
TRINITY_DN2783_c0_g1_i52	0.000185871	0.031727	0	0	0	0	0	0	30.41	151.32	#N/A	#N/A	#N/A	GO:0051301	Up in Males
TRINITY_DN5841_c0_g1_i9	4.34e-06	0.00391276	0	0.12	0	0	3.56	23.88	14.57	163.64	#N/A	#N/A	#N/A	GO:0006119	Up in Males
TRINITY_DN29675_c0_g1_i186	0.000277201	0.0366686	0	0	0	0	0	9.44	0	161.42	#N/A	#N/A	#N/A	GO:0036158	Up in Males
TRINITY_DN7141_c0_g1_i19	3.35e-06	0.00338102	0	0	0	0	2.71	15.15	20.81	136.28	#N/A	#N/A	#N/A	GO:0030683	Up in Males
TRINITY_DN15511_c0_g1_i1	6.74e-05	0.0202197	0	0	0	2	537	11	0	310	#N/A	#N/A	#N/A	#N/A	Up in Males
TRINITY_DN3664_c0_g1_i15	1.43e-06	0.00215297	0	0	0	0	18.44	14.23	8.33	130.24	#N/A	#N/A	#N/A	GO:0016573	Up in Males
TRINITY_DN4591_c0_g1_i1	0.000164594	0.030466	0	0	0	0	88.1	0	0	69.22	#N/A	#N/A	#N/A	GO:0007399	Up in Males
TRINITY_DN784_c0_g1_i1	1.05e-05	0.00712609	0	0	0	0	30.54	32.54	119.97	0	#N/A	#N/A	#N/A	GO:0010930	Up in Males
TRINITY_DN1920_c0_g1_i1	6.49e-05	0.0196725	0	0	0	0	90	1	0	66	#N/A	#N/A	#N/A	#N/A	Up in Males
TRINITY_DN36779_c0_g1_i1	4.96e-05	0.0177117	0	0	0	0	99	2	0	53	#N/A	#N/A	#N/A	GO:0051321	Up in Males
TRINITY_DN2819_c0_g1_i20	5.44e-06	0.00442408	0	0	0	0	4.86	6.29	14.72	176.85	#N/A	#N/A	#N/A	#N/A	Up in Males
TRINITY_DN1619_c0_g1_i1	3.13e-06	0.00326212	0	0	0	0	3.23	15.73	19.29	169.64	#N/A	#N/A	#N/A	GO:0051321	Up in Males
TRINITY_DN75187_c0_g1_i1	5.5e-05	0.0177858	0	0	0	0	137	2	0	37	#N/A	#N/A	#N/A	GO:0009968	Up in Males
TRINITY_DN62156_c0_g1_i1	0.000149488	0.0290125	0	0	0	0	97	0	0	95	#N/A	#N/A	#N/A	GO:0051321	Up in Males
TRINITY_DN8327_c0_g1_i1	1.47e-05	0.00857697	0	0	0	0	112	14	69	0	#N/A	#N/A	#N/A	GO:0039700	Up in Males
TRINITY_DN8169_c0_g1_i1	0.000167314	0.030466	0	0	0	0	139	0	0	52	#N/A	#N/A	#N/A	GO:0015918	Up in Males
TRINITY_DN80255_c0_g1_i1	9.95e-06	0.00705191	1	0	0	2	1072	35	0	353	#N/A	#N/A	#N/A	#N/A	Up in Males
TRINITY_DN3096_c0_g1_i4	1.16e-05	0.00732246	0	0	0	0	0	18.46	55.61	165.14	#N/A	#N/A	#N/A	GO:0033366	Up in Males
TRINITY_DN1419_c0_g1_i15	1.89e-05	0.0101746	0	0	0	0	2.13	2.89	10.63	230.28	#N/A	#N/A	#N/A	GO:0016233	Up in Males
TRINITY_DN13521_c0_g1_i2	5.6e-07	0.000982022	0	0	0	0	12	23	26	173.5	#N/A	#N/A	#N/A	GO:0006260	Up in Males
TRINITY_DN2965_c0_g1_i11	1.43e-07	0.000393927	0	0	0	0	42.17	25.81	22.52	133.33	#N/A	#N/A	#N/A	GO:0001654	Up in Males
TRINITY_DN6276_c0_g1_i1	1.85e-05	0.0100995	0	0	0	0	134	32	0	23	#N/A	#N/A	#N/A	GO:0008285	Up in Males
TRINITY_DN15434_c0_g1_i5	0.000217566	0.0338256	0	0	0	0	0	11.75	329.73	0	#N/A	#N/A	#N/A	GO:0046718	Up in Males
TRINITY_DN7441_c0_g1_i4	1.12e-05	0.00725933	0	0	0	0	6.35	1.81	14.63	246.05	#N/A	#N/A	#N/A	GO:0016233	Up in Males
TRINITY_DN119_c0_g1_i2	0.000301335	0.0383153	0	0	0	0	5	0	0	271	#N/A	#N/A	#N/A	#N/A	Up in Males
TRINITY_DN11053_c0_g1_i4	5.28e-07	0.000978022	0	0	0	0	9	21.72	43	196.07	#N/A	#N/A	#N/A	GO:0030242	Up in Males
TRINITY_DN3476_c0_g1_i3	2.78e-06	0.00299688	0	0	0	0	3.57	17.25	23.36	231.84	#N/A	#N/A	#N/A	GO:0006487	Up in Males
TRINITY_DN2319_c0_g1_i1	5.26e-05	0.0177117	0	0	0	0	100	86	0	1.74	#N/A	#N/A	#N/A	GO:0019050	Up in Males
TRINITY_DN784_c0_g1_i7	1.61e-06	0.00223845	0	0	0	0	4.28	14.75	33.87	93.94	#N/A	#N/A	#N/A	GO:0050435	Up in Males
TRINITY_DN27375_c0_g1_i1	5.22e-05	0.0177117	0	0	0	0	100	2	0	48	#N/A	#N/A	#N/A	GO:0030703	Up in Males
TRINITY_DN273_c0_g1_i36	1.54e-07	0.000393927	0	0	0	0	6.97	53.94	143.78	89.11	#N/A	#N/A	#N/A	GO:0034605	Up in Males
TRINITY_DN6453_c0_g1_i1	2.59e-07	0.00061663	0	0	0	0	15	25.15	45.41	208.32	#N/A	#N/A	#N/A	GO:0034220	Up in Males
TRINITY_DN1907_c0_g1_i8	0.000139779	0.028325	0	0	0	0	0	0	55.02	266.49	#N/A	#N/A	#N/A	GO:0042776	Up in Males
TRINITY_DN5631_c0_g1_i1	1.13e-05	0.00725933	0	0	1	1	964	4	0	607	#N/A	#N/A	#N/A	GO:0039553	Up in Males
TRINITY_DN123184_c0_g1_i1	3.16e-05	0.0145241	0	0	0	0	25	6	0	312	#N/A	#N/A	#N/A	#N/A	Up in Males
TRINITY_DN39050_c0_g1_i1	2.79e-06	0.00299688	0	0	0	0	0	82.68	136.87	195.29	#N/A	#N/A	#N/A	GO:0055074	Up in Males
TRINITY_DN6566_c0_g1_i1	8.6e-05	0.0229459	0	0	0	0	234	0	0	164	#N/A	#N/A	#N/A	GO:0006281	Up in Males
TRINITY_DN3986_c0_g1_i1	2.02e-08	9.6e-05	0	0	0	0	12.84	94.55	194.78	151.61	#N/A	#N/A	#N/A	GO:0042795	Up in Males
TRINITY_DN30018_c0_g1_i12	5e-06	0.00437529	0	0	0	0	14.46	0.31	55.27	490.37	#N/A	#N/A	#N/A	GO:0030030	Up in Males
TRINITY_DN3011_c0_g1_i1	3.62e-08	0.000150763	0	0	0	0	12	68	108	359	#N/A	#N/A	#N/A	GO:0030182	Up in Males
TRINITY_DN1619_c0_g1_i8	3.41e-07	0.000757539	0	0	0	0	6.16	26.67	68.14	481.38	#N/A	#N/A	#N/A	GO:0016567	Up in Males
TRINITY_DN5963_c0_g2_i2	4.91e-05	0.0177117	0	0	0	0	0	8.48	6.87	304	#N/A	#N/A	#N/A	GO:0070262	Up in Males
TRINITY_DN12684_c0_g1_i2	6.9e-05	0.0203437	0	0	0	0	231.71	0	0	242.56	#N/A	#N/A	#N/A	GO:0030448	Up in Males

## Sheet: DE_May_females_vs_males
			MALES				FEMALES				Annotation
Transcript_ID	PValue	FDR	Hp_48	Hp_53	Hp_52	Hp_46	Hp_47	Hp_50	Hp_55	Hp_56	Swissprot_PROK	IMG	Annotation_from_Susy_genome	FANTASIA	TAG
TRINITY_DN84_c0_g1_i7	2.12e-09	4.75e-05	0	0	0	2.24883	319.467	2369.72	3184.47	2018.97	#N/A	#N/A	#N/A	GO:0042144	Up in Males
TRINITY_DN178_c0_g1_i23	0.00014203	0.0241234	0	0	0	0	153.535	791.399	0	0	#N/A	#N/A	#N/A	GO:0007165	Up in Males
TRINITY_DN343_c0_g1_i11	2.89e-08	0.000225017	0	0	0	0	47.6817	187.79	567.621	173.283	#N/A	#N/A	#N/A	GO:0051701	Up in Males
TRINITY_DN5947_c0_g1_i2	8.89e-08	0.000397369	0	0	0	0	20.98	214.617	228.729	209.687	#N/A	#N/A	#N/A	GO:0031589	Up in Males
TRINITY_DN34_c0_g1_i48	1.86e-07	0.000628286	0	0	0	0	15.2581	148.667	145.64	232.986	#N/A	#N/A	#N/A	GO:0030466	Up in Males
TRINITY_DN1094_c0_g1_i8	2.25e-07	0.000628286	0	0	0	0	15.2581	98.3659	285.678	141.248	#N/A	NA	#N/A	GO:0030335	Up in Males
TRINITY_DN2491_c0_g1_i5	8.47e-07	0.00135286	0	0	0	0	12.3972	126.311	31.742	165.274	#N/A	#N/A	#N/A	GO:0039503	Up in Males
TRINITY_DN3197_c0_g2_i7	1.5e-05	0.00819095	0	0	0	0	138.277	49.183	205.389	0	#N/A	#N/A	#N/A	GO:0045185	Up in Males
TRINITY_DN7441_c0_g1_i4	1.34e-05	0.00748614	0	0	0	0	0	93.8948	144.706	83.0012	#N/A	#N/A	#N/A	GO:0016233	Up in Males
TRINITY_DN784_c0_g1_i1	4.28e-07	0.000797045	0	0	0	0	14.3045	44.7118	126.968	112.124	#N/A	#N/A	#N/A	GO:0010930	Up in Males
TRINITY_DN3263_c0_g1_i14	1.12e-06	0.00156094	0	0	0	0	6.67544	107.308	164.311	31.3075	#N/A	NA	#N/A	GO:0061512	Up in Males
TRINITY_DN363_c0_g1_i11	9.37e-05	0.0205392	0	0	0	0	27.6554	0	306.217	1.45616	#N/A	#N/A	#N/A	GO:0046718	Up in Males
TRINITY_DN3011_c0_g1_i1	2.19e-07	0.000628286	0	0	0	0	20.0263	74.8923	98.9603	68.4396	#N/A	#N/A	#N/A	GO:0030182	Up in Males
TRINITY_DN2965_c0_g1_i11	1.73e-05	0.00840839	0	0	0	0	0	78.2456	53.2145	108.484	#N/A	#N/A	#N/A	GO:0001654	Up in Males
TRINITY_DN13602_c1_g1_i1	0.000244334	0.0312106	0	0	0	0	0	96.1304	168.979	0	#N/A	#N/A	#N/A	GO:0039700	Up in Males
TRINITY_DN3131_c1_g1_i8	0.000467225	0.0415745	0	0	0	0	0	5.58897	274.475	0	#N/A	#N/A	#N/A	GO:0030683	Up in Males
TRINITY_DN105_c0_g1_i30	0.000523121	0.042713	0	0	0	0	0	3.35338	0	200.95	#N/A	#N/A	#N/A	GO:0048367	Up in Males
TRINITY_DN363_c0_g1_i14	1.58e-05	0.00819095	0	0	0	0	102.993	87.188	68.1519	0	#N/A	#N/A	#N/A	GO:0030683	Up in Males
TRINITY_DN1619_c0_g1_i7	1.06e-06	0.00156094	0	0	0	0	5.72181	77.1278	80.2885	54.606	#N/A	#N/A	#N/A	GO:0016567	Up in Males
TRINITY_DN21_c1_g1_i16	2.64e-05	0.0105509	0	0	0	0	154.489	40.2406	0	30.5794	#N/A	#N/A	#N/A	GO:0046718	Up in Males
TRINITY_DN2050_c0_g1_i5	2.43e-05	0.00987051	0	0	0	0	140.184	33.5338	0	47.3252	#N/A	#N/A	#N/A	GO:0006468	Up in Males
TRINITY_DN9611_c0_g1_i5	6.46e-07	0.00111029	0	0	0	0	11.4436	36.8872	90.558	69.8957	#N/A	#N/A	#N/A	GO:0019319	Up in Males
TRINITY_DN5164_c0_g1_i1	4.78e-06	0.00395551	0	0	0	0	3.81454	13.4135	141.905	57.5184	#N/A	#N/A	#N/A	GO:0051301	Up in Males
TRINITY_DN1619_c0_g1_i1	4.42e-06	0.00379849	0	0	0	0	0.953634	78.2456	55.0817	61.1588	#N/A	#N/A	#N/A	GO:0051321	Up in Males
TRINITY_DN1899_c0_g1_i19	3.39e-05	0.0118531	0	0	0	0	129.694	187.79	195.12	0	#N/A	#N/A	#N/A	GO:0007169	Up in Males
TRINITY_DN8012_c0_g1_i6	2.99e-06	0.00307831	0	0	0	0	1.90727	53.6542	63.484	62.6149	#N/A	NA	#N/A	GO:0042255	Up in Males
TRINITY_DN1765_c0_g2_i1	1.74e-05	0.00840839	0	0	0	0	77.2444	0	70.0191	45.8691	#N/A	#N/A	#N/A	GO:0030683	Up in Males
TRINITY_DN5841_c0_g1_i9	1.97e-05	0.00879047	0	0	0	0	0	60.3609	34.5427	66.2553	#N/A	#N/A	#N/A	GO:0006119	Up in Males
TRINITY_DN14795_c0_g1_i1	3.07e-05	0.0116242	0	0	0	0	74.3835	0	98.0267	14.5616	#N/A	#N/A	#N/A	GO:0051028	Up in Males
TRINITY_DN14645_c0_g1_i17	0.000383056	0.0394144	0	0	0	0	0	122.957	0	33.4917	#N/A	#N/A	#N/A	GO:2000272	Up in Males
TRINITY_DN39050_c0_g1_i1	3.45e-05	0.0118531	0	0	0	0	0	91.6592	45.7458	25.4828	#N/A	#N/A	#N/A	GO:0055074	Up in Males
TRINITY_DN1058_c0_g1_i4	4.38e-05	0.0146088	0	0	0	0	45.7744	65.9499	0	29.8513	#N/A	#N/A	#N/A	GO:0006919	Up in Males
TRINITY_DN3476_c0_g1_i3	5.39e-06	0.00430567	0	0	0	0	4.76817	24.5915	95.226	24.0267	#N/A	#N/A	#N/A	GO:0006487	Up in Males
TRINITY_DN1094_c0_g1_i20	0.000119023	0.0225705	0	0	0	0	0	29.0627	5.60153	86.6416	#N/A	NA	#N/A	GO:0009098	Up in Males
TRINITY_DN6323_c0_g1_i10	8.97e-05	0.0205392	0	0	0	0	55.3108	6.70677	0	69.8957	#N/A	#N/A	#N/A	GO:0007049	Up in Males
TRINITY_DN11053_c0_g1_i4	4.26e-06	0.00379849	0	0	0	0	5.72181	36.8872	35.4763	50.2375	#N/A	#N/A	#N/A	GO:0030242	Up in Males
TRINITY_DN7441_c0_g1_i3	1.71e-06	0.00191404	0	0	0	0	17.1654	24.5915	47.613	39.3163	#N/A	#N/A	#N/A	GO:0006606	Up in Males
TRINITY_DN363_c0_g1_i1	0.000589274	0.0445007	0	0	0	0	95.3634	42.4762	0	0	#N/A	#N/A	#N/A	GO:0030683	Up in Males
TRINITY_DN343_c0_g1_i17	0.000126616	0.0230111	0	0	0	0	0	64.8321	5.60153	46.5971	#N/A	#N/A	#N/A	GO:0035556	Up in Males
TRINITY_DN914_c0_g1_i22	5.4e-05	0.0168681	0	0	0	0	0	23.4737	112.964	37.8602	#N/A	#N/A	#N/A	GO:0036462	Up in Males
TRINITY_DN14510_c0_g2_i8	0.000235802	0.030935	0	0	0	0	11.4436	0	2.80076	94.6505	#N/A	#N/A	#N/A	GO:0006310	Up in Males
TRINITY_DN7441_c0_g1_i9	0.000489531	0.0419492	0	0	0	0	0	0	61.6168	60.4307	#N/A	#N/A	#N/A	GO:0030683	Up in Males
TRINITY_DN1619_c0_g1_i8	1.59e-06	0.00186748	0	0.823875	0	0	34.3308	101.719	196.987	91.0101	#N/A	#N/A	#N/A	GO:0016567	Up in Males
TRINITY_DN3103_c1_g1_i8	9.7e-05	0.0208475	0	0	0	0	63.8935	0	44.8122	13.8335	#N/A	#N/A	#N/A	GO:0007293	Up in Males
TRINITY_DN5963_c0_g2_i2	6.88e-05	0.0187433	0	0	0	0.749609	0	135.253	123.234	67.7115	#N/A	#N/A	#N/A	GO:0070262	Up in Males
TRINITY_DN19550_c0_g1_i8	0.000161601	0.0254397	0	0	0	0	83.9198	0	18.6718	13.1054	#N/A	#N/A	#N/A	GO:0030437	Up in Males
TRINITY_DN1619_c0_g1_i2	0.000136534	0.0238444	0	0.823875	0	0	0	78.2456	119.499	174.739	#N/A	#N/A	#N/A	GO:0016567	Up in Males
TRINITY_DN7441_c0_g1_i7	2.11e-05	0.00907669	0	0	0	0	4.76817	51.4186	28.9412	15.2897	#N/A	#N/A	#N/A	GO:0039503	Up in Males
TRINITY_DN8012_c0_g1_i4	3.27e-05	0.0118531	0	0	0	0	4.76817	29.0627	13.0702	42.2287	#N/A	NA	#N/A	GO:0042255	Up in Males
TRINITY_DN3664_c0_g1_i15	1.74e-05	0.00840839	0	0	0	0	7.62907	23.4737	35.4763	26.939	#N/A	#N/A	#N/A	GO:0016573	Up in Males
TRINITY_DN3096_c0_g1_i9	0.000394242	0.0394144	0	0	0	0	0	3.35338	66.2847	24.7547	#N/A	NA	#N/A	GO:0001503	Up in Males
TRINITY_DN1090_c0_g1_i7	0.000437497	0.0400812	0	0	0	0	0	2.23559	44.8122	41.5006	#N/A	#N/A	#N/A	GO:0030683	Up in Males
TRINITY_DN10648_c0_g1_i18	0.00024256	0.0311621	0	0	0	0	49.589	19.0025	0	21.8424	#N/A	#N/A	#N/A	GO:0016032	Up in Males
TRINITY_DN1099_c4_g2_i4	0.000156829	0.0250411	0	0	0	0	0.953634	7.82456	18.6718	53.1499	#N/A	#N/A	#N/A	GO:0043086	Up in Males
TRINITY_DN34_c0_g1_i85	0.000255786	0.0321235	0	0	0	0	0	35.7694	30.8084	18.202	#N/A	#N/A	#N/A	GO:0050790	Up in Males
TRINITY_DN307_c0_g1_i4	0.000599061	0.044638	0	0	0	0	0	5.58897	8.40229	61.8868	#N/A	#N/A	#N/A	GO:0006954	Up in Males
TRINITY_DN3552_c0_g1_i30	0.000502118	0.0424243	0	0	0	0	0	11.1779	7.4687	54.606	#N/A	#N/A	#N/A	GO:0007268	Up in Males
TRINITY_DN4489_c0_g1_i2	0.000474867	0.041792	0	0	0	0	10.49	0	72.8198	6.55272	#N/A	#N/A	#N/A	GO:0007040	Up in Males
TRINITY_DN3103_c1_g1_i9	0.000355249	0.0383692	0	0	0	0	58.1717	0	12.1366	14.5616	#N/A	#N/A	#N/A	GO:0007052	Up in Males
TRINITY_DN343_c0_g1_i18	0.000326799	0.0374068	0	0	0	0	4.76817	4.47118	78.4214	0.72808	#N/A	#N/A	#N/A	#N/A	Up in Males
TRINITY_DN1456_c0_g1_i17	0.000366118	0.0391588	0	0	0	0	30.5163	11.1779	43.8786	0	#N/A	#N/A	#N/A	GO:0030683	Up in Males
TRINITY_DN14645_c0_g1_i16	0.000465481	0.0415745	0	0	0	0	21.9336	0	59.7496	4.36848	#N/A	#N/A	#N/A	GO:0043161	Up in Males
TRINITY_DN1826_c1_g1_i1	7.4e-05	0.0196153	0	0	0	0	1.90727	19.0025	25.2069	25.4828	#N/A	#N/A	#N/A	GO:0051301	Up in Males
TRINITY_DN1094_c0_g1_i1	0.0001125	0.0223738	0	0	0	0	15.2581	38.005	0.933588	16.7458	#N/A	NA	#N/A	GO:0001953	Up in Males
TRINITY_DN6544_c0_g1_i39	0.000468675	0.0415745	0	0	0	0	0	8.94236	55.0817	13.1054	#N/A	#N/A	#N/A	GO:0007186	Up in Males
TRINITY_DN363_c0_g1_i2	0.000570394	0.0439675	0	0	0	0	7.62907	12.2957	62.5504	0	#N/A	#N/A	#N/A	GO:0039573	Up in Males
TRINITY_DN246_c0_g1_i14	0.000410122	0.0394144	0	0	0	0	40.0526	16.7669	0	14.5616	#N/A	#N/A	#N/A	GO:0070580	Up in Males
TRINITY_DN8915_c0_g2_i2	0.000450283	0.0408479	0	0	0	0	34.3308	10.0602	0	25.4828	#N/A	#N/A	#N/A	GO:0090305	Up in Males
TRINITY_DN412_c0_g1_i7	0.000491402	0.0419492	0	0	0	0	0	8.94236	48.5466	16.0178	#N/A	#N/A	#N/A	GO:0000165	Up in Males
TRINITY_DN14915_c1_g1_i1	0.000603577	0.0448046	0	0	0	0	0	34.6516	34.5427	3.6404	#N/A	NA	#N/A	GO:0006357	Up in Males
TRINITY_DN2452_c0_g1_i7	0.000582554	0.0442939	0	0	0	0	4.76817	24.5915	43.8786	0	#N/A	#N/A	#N/A	GO:0000724	Up in Males
TRINITY_DN1245_c1_g1_i14	0.000405497	0.0394144	0	0	0	0	10.49	0	27.074	29.8513	#N/A	#N/A	#N/A	GO:0048255	Up in Males
TRINITY_DN5164_c0_g1_i2	0.000712676	0.0492872	0	0	0	0	3.81454	40.2406	0	18.9301	#N/A	#N/A	#N/A	GO:0051301	Up in Males
TRINITY_DN784_c0_g1_i7	0.000174031	0.0264645	0	0	0	0	0.953634	19.0025	14.9374	27.6671	#N/A	#N/A	#N/A	GO:0050435	Up in Males
TRINITY_DN34_c0_g1_i39	0.000422891	0.0394144	0	0	0	0	0	30.1805	19.6053	14.5616	#N/A	#N/A	#N/A	GO:0030466	Up in Males
TRINITY_DN12292_c0_g1_i5	0.000355302	0.0383692	0	0	0	0	24.7945	0	17.7382	24.0267	#N/A	#N/A	#N/A	GO:0000165	Up in Males
TRINITY_DN29675_c0_g1_i186	0.000418189	0.0394144	0	0	0	0	0	14.5313	30.8084	20.3863	#N/A	#N/A	#N/A	GO:0036158	Up in Males
TRINITY_DN9366_c0_g2_i8	0.000420534	0.0394144	0	0	0	0	0	27.9449	18.6718	17.4739	#N/A	#N/A	#N/A	GO:0070507	Up in Males
TRINITY_DN3103_c1_g1_i13	0.000403567	0.0394144	0	0	0	0	39.099	0	15.871	13.8335	#N/A	#N/A	#N/A	GO:0006325	Up in Males
TRINITY_DN1064_c0_g1_i1	3.37e-05	0.0118531	0	0	0	0	20.0263	14.5313	11.2031	18.202	#N/A	#N/A	#N/A	GO:0006915	Up in Males
TRINITY_DN7441_c0_g1_i1	9.17e-05	0.0205392	0	0	0	0	1.90727	17.8847	21.4725	20.3863	#N/A	#N/A	#N/A	GO:0039503	Up in Males
TRINITY_DN1907_c0_g1_i2	0.000579133	0.0442072	0	0	0	0	4.76817	0	43.8786	16.0178	#N/A	#N/A	#N/A	GO:0042776	Up in Males
TRINITY_DN343_c0_g1_i20	6.15e-05	0.018261	0	0	0	0	4.76817	19.0025	23.3397	12.3774	#N/A	NA	#N/A	GO:0039503	Up in Males
TRINITY_DN1826_c1_g1_i5	0.000122251	0.0227734	0	0	0	0	1.90727	10.0602	19.6053	24.7547	#N/A	#N/A	#N/A	GO:0051301	Up in Males
TRINITY_DN2963_c0_g1_i2	8.39e-05	0.0205392	0	0	0	0	3.81454	17.8847	16.8046	18.202	#N/A	#N/A	#N/A	GO:0007411	Up in Males
TRINITY_DN8012_c0_g1_i7	0.000210852	0.0299286	0	0	0	0	4.76817	20.1203	1.86718	25.4828	#N/A	NA	#N/A	GO:0007420	Up in Males
TRINITY_DN7420_c0_g2_i1	3.17e-06	0.00307831	1.60647	0	0	1.49922	47.6817	166.551	127.902	107.028	#N/A	#N/A	#N/A	GO:0090136	Up in Males
TRINITY_DN6503_c0_g1_i17	0.000639364	0.0462535	0	0	0	0	7.62907	0	16.8046	24.0267	#N/A	#N/A	#N/A	GO:0110148	Up in Males
TRINITY_DN34_c0_g1_i84	0.000287988	0.0346113	0	0	0	0	7.62907	38.005	26.1405	0.72808	#N/A	#N/A	#N/A	GO:0007218	Up in Males
TRINITY_DN23695_c0_g1_i1	0.000238025	0.030935	0	0	0	0	0.953634	12.2957	20.5389	16.0178	#N/A	#N/A	#N/A	GO:0006355	Up in Males
TRINITY_DN14503_c0_g2_i2	0.000663354	0.0472249	0	0	0	0	0	14.5313	10.2695	19.6582	#N/A	#N/A	#N/A	GO:0032757	Up in Males
TRINITY_DN812_c0_g1_i4	2.28e-05	0.00949036	0	0.823875	0	0	6.67544	65.9499	42.0114	53.878	#N/A	#N/A	#N/A	GO:0045332	Up in Males
TRINITY_DN886_c0_g1_i16	0.000124521	0.0228961	0	0	0	0	2.8609	12.2957	16.8046	14.5616	#N/A	NA	#N/A	GO:0010951	Up in Males
TRINITY_DN3406_c0_g1_i14	0.000714371	0.0492872	0	0	0	0	26.7018	20.1203	0.933588	0.72808	#N/A	#N/A	#N/A	GO:0007155	Up in Males
TRINITY_DN2205_c0_g1_i8	8.34e-05	0.0205392	0	0	0	0	7.62907	6.70677	24.2733	8.00888	#N/A	#N/A	#N/A	GO:0007165	Up in Males
TRINITY_DN1765_c0_g2_i7	0.000575275	0.0441914	0	0	0	0	14.3045	0	14.9374	16.7458	#N/A	#N/A	#N/A	GO:0046718	Up in Males
TRINITY_DN4489_c0_g1_i1	7.41e-05	0.0196153	0	0	0	0	10.49	6.70677	18.6718	8.00888	#N/A	#N/A	#N/A	GO:0099001	Up in Males
TRINITY_DN1907_c0_g1_i3	0.000164545	0.025722	0	0	0	0	2.8609	7.82456	22.4061	8.73697	#N/A	#N/A	#N/A	GO:0061842	Up in Males
TRINITY_DN214_c0_g1_i13	0.000114561	0.0223738	0	0	0	0	7.62907	5.58897	14.0038	10.1931	#N/A	#N/A	#N/A	GO:0006954	Up in Males
TRINITY_DN3883_c0_g1_i11	0.000118359	0.0225705	0	0	0	0	5.72181	11.1779	9.33588	9.46505	#N/A	#N/A	#N/A	GO:1900016	Up in Males
TRINITY_DN2852_c0_g1_i8	0.000454771	0.0409917	0	0	0	0	0.953634	16.7669	7.4687	9.46505	#N/A	#N/A	#N/A	#N/A	Up in Males
TRINITY_DN784_c0_g1_i8	0.000217857	0.0304373	0	0	0	0	2.8609	7.82456	9.33588	15.2897	#N/A	#N/A	#N/A	GO:0030420	Up in Males
TRINITY_DN3664_c0_g1_i26	5.43e-05	0.0168681	0.803233	0	0	0	9.53634	34.6516	55.0817	16.7458	#N/A	#N/A	#N/A	GO:0042127	Up in Males
TRINITY_DN7563_c0_g1_i16	0.000421104	0.0394144	0	0	0	0	0.953634	5.58897	23.3397	5.82464	#N/A	#N/A	#N/A	GO:0031333	Up in Males
TRINITY_DN886_c0_g1_i6	0.000426502	0.0395603	0	0	0	0	1.90727	14.5313	3.73435	11.6493	#N/A	#N/A	#N/A	#N/A	Up in Males
TRINITY_DN6453_c0_g1_i1	0.000322145	0.0374068	0	0.823875	0	0.749609	0	74.8923	70.0191	50.2375	#N/A	#N/A	#N/A	GO:0034220	Up in Males
TRINITY_DN2754_c0_g1_i2	0.00013825	0.023957	0	0	0	0	12.3972	6.70677	8.40229	5.82464	#N/A	#N/A	#N/A	GO:0002230	Up in Males
TRINITY_DN19438_c0_g1_i3	0.000339772	0.0379764	0	0	0	0	6.67544	1.11779	12.1366	12.3774	#N/A	#N/A	#N/A	GO:0042144	Up in Males
TRINITY_DN2545_c0_g1_i16	0.000336102	0.0377549	0	0	0	0	1.90727	7.82456	10.2695	8.00888	#N/A	#N/A	#N/A	GO:0030154	Up in Males
TRINITY_DN1221_c2_g1_i7	0.00051932	0.042713	0	0	0	0	3.81454	4.47118	3.73435	14.5616	#N/A	#N/A	#N/A	GO:0007165	Up in Males
TRINITY_DN34881_c0_g1_i3	0.000719036	0.0493796	0	0	0	0	2.8609	1.11779	12.1366	11.6493	#N/A	#N/A	#N/A	GO:0016598	Up in Males
TRINITY_DN3571_c0_g1_i6	0.00040166	0.0394144	0	0	0	0	6.67544	4.47118	3.73435	9.46505	#N/A	#N/A	#N/A	GO:0001172	Up in Males
TRINITY_DN7050_c0_g1_i11	0.000390502	0.0394144	0	0	0	0	3.81454	10.0602	6.53511	4.36848	#N/A	#N/A	#N/A	GO:0006974	Up in Males
TRINITY_DN13521_c0_g1_i2	9.36e-05	0.0205392	0.803233	0	0	0.749609	3.81454	51.4186	31.742	40.7725	#N/A	#N/A	#N/A	GO:0006260	Up in Males
TRINITY_DN741_c0_g1_i71	0.000720785	0.0493796	0	0	0	0	1.90727	8.94236	2.80076	8.73697	#N/A	#N/A	#N/A	GO:0051321	Up in Males
TRINITY_DN25512_c0_g1_i20	0.000346768	0.0381855	0	0	0	0	7.62907	6.70677	3.73435	5.09656	#N/A	#N/A	#N/A	GO:0050687	Up in Males
TRINITY_DN741_c0_g1_i44	0.000540946	0.0430886	0	0	0	0	3.81454	4.47118	4.66794	8.73697	#N/A	#N/A	#N/A	#N/A	Up in Males
TRINITY_DN6640_c0_g1_i5	0.000542207	0.0430886	0	0	0	0.749609	1.90727	24.5915	19.6053	21.1143	#N/A	#N/A	#N/A	GO:0000711	Up in Males
TRINITY_DN246_c0_g1_i24	0.000407264	0.0394144	0	0.823875	0	0	81.0589	26.8271	3.73435	21.1143	#N/A	#N/A	#N/A	GO:0046740	Up in Males
TRINITY_DN10248_c0_g1_i5	0.000508455	0.0425859	0	0	0	0	2.8609	6.70677	7.4687	4.36848	#N/A	#N/A	#N/A	GO:0030308	Up in Males
TRINITY_DN10055_c1_g1_i5	0.000661236	0.0472249	0	0	0	0	3.81454	5.58897	3.73435	3.6404	#N/A	#N/A	#N/A	GO:0006310	Up in Males
TRINITY_DN3986_c0_g1_i1	0.000379791	0.0394144	0	0	5.54644	1.49922	13.3509	109.544	47.613	56.0622	#N/A	#N/A	#N/A	GO:0042795	Up in Males
TRINITY_DN951_c0_g1_i11	0.000226605	0.030935	1.60647	0	0	0.749609	13.3509	16.7669	56.9489	27.6671	#N/A	#N/A	#N/A	GO:0051673	Up in Males
TRINITY_DN2963_c0_g1_i1	0.000232323	0.030935	10.442	0	2.77322	2.99844	46.7281	169.905	183.917	141.248	#N/A	#N/A	#N/A	GO:0070986	Up in Males
TRINITY_DN6619_c0_g1_i20	0.000538586	0.0430886	5.62263	0.823875	5.54644	8.2457	0	0	0	0	#N/A	#N/A	#N/A	#N/A	Up in Females
TRINITY_DN16616_c0_g1_i8	0.000520969	0.042713	8.03233	1.64775	0	2.24883	0	0	0	0	#N/A	#N/A	#N/A	GO:0090158	Up in Females
TRINITY_DN18258_c0_g1_i25	0.000383169	0.0394144	7.2291	7.41487	11.0929	2.24883	0	0	0	0	#N/A	#N/A	#N/A	GO:0006955	Up in Females
TRINITY_DN31872_c1_g1_i6	0.000192976	0.028654	4.01617	2.47162	5.54644	5.24727	0	0	0	0	#N/A	#N/A	#N/A	GO:0010447	Up in Females
TRINITY_DN619_c0_g1_i46	0.000594203	0.0445007	8.03233	2.47162	0	7.49609	0	0	0	0	#N/A	NA	#N/A	GO:0110148	Up in Females
TRINITY_DN5163_c0_g2_i2	0.000234652	0.030935	1.60647	3.2955	5.54644	9.74492	0	0	0	0	#N/A	#N/A	#N/A	GO:0002637	Up in Females
TRINITY_DN709_c3_g1_i14	0.000111861	0.0223738	6.42586	2.47162	8.31966	4.49766	0	0	0	0	#N/A	#N/A	#N/A	GO:0031424	Up in Females
TRINITY_DN9506_c0_g1_i1	0.000471609	0.0416693	13.655	3.2955	0	5.99688	0	0	0	0	#N/A	#N/A	#N/A	GO:0030683	Up in Females
TRINITY_DN2855_c0_g1_i16	0.000519137	0.042713	12.8517	4.11937	0	3.74805	0	0	0	0	#N/A	#N/A	#N/A	GO:0009617	Up in Females
TRINITY_DN3272_c0_g1_i9	0.000494277	0.0420117	8.83556	1.64775	0	13.493	0	0	0	0	#N/A	#N/A	#N/A	GO:0015979	Up in Females
TRINITY_DN25132_c0_g1_i8	0.000722337	0.0493796	6.42586	0	13.8661	5.24727	0	0	0	0	#N/A	#N/A	#N/A	GO:0048278	Up in Females
TRINITY_DN4449_c0_g1_i5	0.000327983	0.0374068	11.2453	4.11937	0	7.49609	0	0	0	0	#N/A	#N/A	#N/A	GO:0010951	Up in Females
TRINITY_DN9149_c0_g1_i14	0.000558655	0.0433402	14.4582	0.823875	0	11.2441	0	0	0	0	#N/A	#N/A	#N/A	GO:0043065	Up in Females
TRINITY_DN1909_c0_g1_i68	9.33e-05	0.0205392	3.21293	3.2955	8.31966	11.2441	0	0	0	0	#N/A	#N/A	#N/A	GO:0006260	Up in Females
TRINITY_DN637_c0_g1_i19	0.000423166	0.0394144	167.072	396.284	657.253	495.492	1.90727	0	33.6092	0	#N/A	NA	#N/A	GO:0030435	Up in Females
TRINITY_DN2615_c0_g1_i20	6.71e-05	0.0187433	10.442	4.11937	5.54644	5.24727	0	0	0	0	#N/A	#N/A	#N/A	GO:0039525	Up in Females
TRINITY_DN4965_c0_g1_i8	0.000294376	0.0351897	16.0647	2.47162	0	10.4945	0	0	0	0	#N/A	#N/A	#N/A	GO:0009099	Up in Females
TRINITY_DN2296_c0_g1_i10	0.000277891	0.0335782	12.8517	4.94325	0	26.9859	0	0	0	0	#N/A	#N/A	#N/A	GO:0039557	Up in Females
TRINITY_DN4092_c0_g1_i5	0.000254014	0.0321235	6.42586	5.76712	0	17.241	0	0	0	0	#N/A	#N/A	#N/A	GO:0032508	Up in Females
TRINITY_DN1282_c4_g1_i1	0.000546136	0.0430886	10.442	0.823875	0	23.9875	0	0	0	0	#N/A	#N/A	#N/A	#N/A	Up in Females
TRINITY_DN5842_c0_g1_i3	0.000529504	0.0429897	0	7.41487	11.0929	11.2441	0	0	0	0	#N/A	#N/A	#N/A	GO:0097533	Up in Females
TRINITY_DN404_c1_g1_i30	0.000683168	0.0480237	0	4.11937	24.959	5.24727	0	0	0	0	#N/A	#N/A	#N/A	GO:0030150	Up in Females
TRINITY_DN40136_c0_g1_i21	0.000237521	0.030935	0.803233	2.47162	8.31966	24.7371	0	0	0	0	#N/A	#N/A	#N/A	GO:0150078	Up in Females
TRINITY_DN7438_c0_g1_i7	0.00053098	0.0429897	3.21293	0	27.7322	8.2457	0	0	0	0	#N/A	NA	#N/A	GO:0007169	Up in Females
TRINITY_DN1238_c0_g2_i66	0.000677139	0.0479012	0	6.591	22.1858	2.99844	0	0	0	0	#N/A	NA	#N/A	GO:0048813	Up in Females
TRINITY_DN6039_c0_g1_i31	2.81e-05	0.0110382	7.2291	7.41487	11.0929	7.49609	0	0	0	0	#N/A	#N/A	#N/A	GO:0006468	Up in Females
TRINITY_DN385_c0_g1_i10	0.000398179	0.0394144	12.0485	6.591	16.6393	0	0	0	0	0	#N/A	NA	#N/A	GO:0045597	Up in Females
TRINITY_DN10064_c0_g2_i3	0.000467577	0.0415745	2.4097	0	11.0929	29.9844	0	0	0	0	#N/A	#N/A	#N/A	GO:0043086	Up in Females
TRINITY_DN217_c1_g1_i21	0.000626784	0.045788	21.6873	0.823875	19.4125	0	0	0	0	0	#N/A	#N/A	#N/A	GO:0030433	Up in Females
TRINITY_DN7573_c0_g1_i25	0.000560316	0.0433402	0	1.64775	11.0929	32.2332	0	0	0	0	#N/A	#N/A	#N/A	GO:0042304	Up in Females
TRINITY_DN3860_c0_g1_i42	0.000147524	0.0243299	13.655	4.11937	0	23.9875	0	0	0	0	#N/A	#N/A	#N/A	GO:0040017	Up in Females
TRINITY_DN963_c0_g1_i2	0.000411846	0.0394144	0	4.11937	27.7322	10.4945	0	0	0	0	#N/A	#N/A	#N/A	GO:0019221	Up in Females
TRINITY_DN32066_c0_g1_i4	8.58e-05	0.0205392	6.42586	4.94325	0	29.9844	0	0	0	0	#N/A	#N/A	#N/A	GO:0030435	Up in Females
TRINITY_DN7573_c0_g1_i17	0.000277243	0.0335782	0	24.7162	127.568	35.9813	0	0	1.86718	0	#N/A	#N/A	#N/A	GO:0050796	Up in Females
TRINITY_DN35236_c0_g1_i1	2.29e-05	0.00949036	6.42586	9.06262	8.31966	17.9906	0	0	0	0	#N/A	#N/A	#N/A	GO:0006508	Up in Females
TRINITY_DN825_c0_g1_i1	0.000451348	0.0408479	3.21293	0	5.54644	44.9766	0	0	0	0	#N/A	#N/A	#N/A	GO:0009624	Up in Females
TRINITY_DN7573_c0_g1_i11	0.000674356	0.0478557	0	0	30.5054	17.9906	0	0	0	0	#N/A	#N/A	#N/A	GO:0046693	Up in Females
TRINITY_DN1290_c0_g1_i2	0.000342759	0.0380005	16.8679	14.8297	5.54644	0	0	0	0	0	#N/A	#N/A	#N/A	GO:0006355	Up in Females
TRINITY_DN637_c0_g1_i11	0.000260126	0.0323048	0	6.591	183.033	71.2129	0	1.11779	0	0.72808	#N/A	#N/A	#N/A	#N/A	Up in Females
TRINITY_DN2937_c0_g1_i3	0.000395973	0.0394144	0	11.5342	27.7322	3.74805	0	0	0	0	#N/A	#N/A	#N/A	GO:0030154	Up in Females
TRINITY_DN422_c0_g1_i2	0.000489035	0.0419492	41.7681	0	0	15.7418	0	0	0	0	#N/A	#N/A	#N/A	GO:0007160	Up in Females
TRINITY_DN3646_c0_g3_i9	0.000237434	0.030935	0	13.182	16.6393	18.7402	0	0	0	0	#N/A	#N/A	#N/A	GO:0071514	Up in Females
TRINITY_DN1617_c0_g1_i59	0.000532708	0.0429897	41.7681	9.06262	0	0	0	0	0	0	#N/A	#N/A	#N/A	GO:0046688	Up in Females
TRINITY_DN40115_c0_g2_i5	0.000488988	0.0419492	95.5847	0	0	86.2051	0.953634	0	0	0	#N/A	#N/A	#N/A	GO:0030683	Up in Females
TRINITY_DN637_c0_g1_i18	0.000376054	0.0394144	0	0.823875	30.5054	32.2332	0	0	0	0	#N/A	#N/A	#N/A	#N/A	Up in Females
TRINITY_DN11872_c1_g1_i2	0.00010848	0.0222473	15.2614	6.591	0	39.7293	0	0	0	0	#N/A	#N/A	#N/A	GO:0007165	Up in Females
TRINITY_DN16548_c0_g1_i16	0.000219255	0.0304424	1.60647	14.8297	0	42.7277	0	0	0	0	#N/A	#N/A	#N/A	#N/A	Up in Females
TRINITY_DN2_c3_g1_i30	0.000198193	0.0291475	0	8.23875	16.6393	40.4789	0	0	0	0	#N/A	#N/A	#N/A	GO:0010575	Up in Females
TRINITY_DN4939_c0_g1_i4	0.000609429	0.0448131	41.7681	0	0	32.9828	0	0	0	0	#N/A	#N/A	#N/A	GO:0035194	Up in Females
TRINITY_DN3035_c0_g1_i17	0.000158051	0.0250572	9.6388	29.6595	0	8.2457	0	0	0	0	#N/A	#N/A	#N/A	#N/A	Up in Females
TRINITY_DN4736_c0_g1_i1	0.000139692	0.0240206	0	4.94325	63.7841	142.426	0.953634	0	0	0	#N/A	#N/A	#N/A	#N/A	Up in Females
TRINITY_DN3390_c0_g1_i1	0.00038122	0.0394144	64.2586	6.591	0	0.749609	0	0	0	0	#N/A	#N/A	#N/A	GO:0048255	Up in Females
TRINITY_DN14456_c0_g1_i8	0.000193556	0.028654	42.5714	14.0059	8.31966	0	0	0	0	0	#N/A	#N/A	#N/A	GO:0043473	Up in Females
TRINITY_DN6594_c0_g2_i1	8.83e-06	0.00548214	41.7681	9.06262	11.0929	13.493	0	0	0	0	#N/A	#N/A	#N/A	GO:0001659	Up in Females
TRINITY_DN105_c0_g1_i32	0.000325802	0.0374068	0	10.7104	127.568	319.334	0	1.11779	0	0	#N/A	#N/A	#N/A	GO:0030421	Up in Females
TRINITY_DN789_c0_g1_i12	1.12e-05	0.00646418	16.8679	3.2955	13.8661	53.9719	0	0	0	0	#N/A	NA	#N/A	GO:0030683	Up in Females
TRINITY_DN1439_c0_g1_i18	0.000167835	0.026054	58.636	0	24.959	3.74805	0	0	0	0	#N/A	NA	#N/A	GO:0042144	Up in Females
TRINITY_DN1143_c0_g1_i5	1.48e-06	0.0018364	28.1132	11.5342	27.7322	26.9859	0	0	0	0	#N/A	#N/A	#N/A	GO:0018108	Up in Females
TRINITY_DN2427_c0_g1_i30	0.000449921	0.0408479	14.4582	0	0	89.9531	0	0	0	0	#N/A	#N/A	#N/A	GO:0039704	Up in Females
TRINITY_DN2171_c0_g1_i2	8.69e-05	0.0205392	12.0485	46.137	0	5.24727	0	0	0	0	#N/A	#N/A	#N/A	GO:0045087	Up in Females
TRINITY_DN7573_c0_g1_i6	0.000387046	0.0394144	0	0	27.7322	98.9485	0	0	0	0	#N/A	#N/A	#N/A	GO:0046718	Up in Females
TRINITY_DN31407_c0_g1_i1	0.000101571	0.0212198	0	0	24.959	122.186	0	0	0	0	#N/A	#N/A	#N/A	GO:1904823	Up in Females
TRINITY_DN637_c0_g1_i5	8.45e-05	0.0205392	0	0.823875	22.1858	130.432	0	0	0	0	#N/A	NA	#N/A	GO:0042981	Up in Females
TRINITY_DN7372_c1_g1_i3	9.12e-05	0.0205392	0	52.728	0	127.434	0	0	0	0	#N/A	#N/A	#N/A	GO:0039573	Up in Females
TRINITY_DN3131_c1_g1_i7	6.85e-05	0.0187433	127.714	0	0	100.448	0	0	0	0	#N/A	#N/A	#N/A	GO:0039573	Up in Females
TRINITY_DN2018_c0_g1_i8	6.77e-05	0.0187433	110.043	0	0	120.687	0	0	0	0	#N/A	#N/A	#N/A	GO:0030683	Up in Females
TRINITY_DN1617_c0_g1_i12	3.02e-08	0.000225017	50.6037	30.4834	33.2787	94.4508	0	0	0	0	#N/A	#N/A	#N/A	GO:1902895	Up in Females
TRINITY_DN6323_c0_g1_i2	0.00014667	0.0243299	0	72.501	105.382	0	0	0	0	0	#N/A	#N/A	#N/A	GO:0042981	Up in Females
TRINITY_DN7_c0_g1_i37	0.000124958	0.0228961	10.442	0	0	574.95	0	0	0	0	#N/A	#N/A	#N/A	GO:0034394	Up in Females
TRINITY_DN105_c0_g1_i1	6.62e-06	0.00448389	0	15.6536	213.538	567.454	0	0	0	0	#N/A	NA	#N/A	GO:0035194	Up in Females
TRINITY_DN1879_c0_g1_i4	0.000104027	0.0215317	0	6.591	0	1328.31	0	0	0	0	#N/A	#N/A	#N/A	GO:0045944	Up in Females
			1269.11	940.865	2077.14	5306.49	2717.86	7607.71	9867.09	6632.81
			9593.6
			26825.5

## Sheet: DE_June_NonReprovsFemalesLarvae
			Non REPRODUCTIVE			LARVAE			Annotation
Transcript_ID	PValue	FDR	Hp_66	Hp_61	Hp_69	Hp_68	Hp_71	Hp_74	Swissprot_PROK	IMG	Annotation_from_Susy_genome	FANTASIA
TRINITY_DN136_c0_g1_i72	1,28E+07	0.00139514	142.36	159.33	321.29	0	0	0	#N/A	#N/A	#N/A	GO:0055085	Up in Non reproductive
TRINITY_DN6323_c0_g1_i20	5,01E+09	0.0280656	820.73	0	53.45	0	0	0	#N/A	#N/A	#N/A	GO:0006954	Up in Non reproductive
TRINITY_DN3073_c0_g1_i3	9,17E+08	0.00910428	0	479.77	764.34	0	0	0	#N/A	#N/A	#N/A	#N/A	Up in Non reproductive
TRINITY_DN2319_c0_g1_i1	3,51E+04	7,67E+07	719	383.02	574.43	0	0	0	#N/A	#N/A	#N/A	GO:0019050	Up in Non reproductive
TRINITY_DN17460_c0_g1_i2	4,49E+08	0.0265111	7.5	1372.79	0	0	0	0	#N/A	#N/A	#N/A	GO:0006260	Up in Non reproductive
TRINITY_DN105_c0_g1_i1	6,72E+07	0.00183411	1.39	816.73	1143.41	0	0	0	#N/A	#N/A	#N/A	GO:0035194	Up in Non reproductive
TRINITY_DN14609_c0_g1_i2	0.000290416	0.0477003	13.01	8.78	13.67	0	0	0	#N/A	#N/A	#N/A	#N/A	Up in Non reproductive
TRINITY_DN5018_c0_g1_i5	0.000277782	0.0473911	12.32	12.41	10.77	0	0	0	#N/A	#N/A	#N/A	#N/A	Up in Non reproductive
TRINITY_DN15985_c0_g1_i20	0.000317036	0.0498249	13.26	14.58	7.59	0	0	0	#N/A	#N/A	#N/A	GO:0007165	Up in Non reproductive
TRINITY_DN4575_c0_g2_i2	0.000311297	0.0495925	22.17	9	7.36	0	0	0	#N/A	#N/A	#N/A	GO:0042060	Up in Non reproductive
TRINITY_DN4642_c0_g1_i3	0.000262681	0.0462764	18	9	11	0	0	0	#N/A	#N/A	#N/A	GO:0006281	Up in Non reproductive
TRINITY_DN7032_c0_g1_i8	0.00028908	0.0477003	9.27	8.62	21.88	0	0	0	#N/A	#N/A	#N/A	GO:0042144	Up in Non reproductive
TRINITY_DN10836_c0_g1_i2	0.000271956	0.0471498	11.24	7.07	24.55	0	0	0	#N/A	#N/A	#N/A	#N/A	Up in Non reproductive
TRINITY_DN2484_c0_g1_i5	0.00020099	0.0405392	24.74	9.84	11.67	0	0	0	#N/A	#N/A	#N/A	GO:1901877	Up in Non reproductive
TRINITY_DN12041_c0_g1_i8	0.00018459	0.0393253	15.55	13.32	14.95	0	0	0	#N/A	#N/A	#N/A	GO:0031640	Up in Non reproductive
TRINITY_DN613_c1_g1_i4	0.000262478	0.0462764	23.01	4.64	19.85	0	0	0	#N/A	#N/A	#N/A	GO:0048846	Up in Non reproductive
TRINITY_DN5018_c0_g1_i2	0.000284447	0.0477003	11.26	22.6	7.87	0	0	0	#N/A	#N/A	#N/A	GO:0019050	Up in Non reproductive
TRINITY_DN4857_c0_g1_i2	0.000308534	0.0495925	5	15.86	23.36	0	0	0	#N/A	#N/A	#N/A	GO:0000045	Up in Non reproductive
TRINITY_DN6680_c0_g1_i18	0.000202064	0.0405392	31	8.08	12	0	0	0	#N/A	#N/A	#N/A	GO:0046718	Up in Non reproductive
TRINITY_DN3150_c0_g1_i4	0.00016168	0.0371779	16.09	13.99	16.86	0	0	0	#N/A	#N/A	#N/A	GO:0051781	Up in Non reproductive
TRINITY_DN2406_c0_g1_i70	0.000149165	0.0366124	28.82	16.04	12.24	0	0	0.03	#N/A	#N/A	#N/A	GO:0075733	Up in Non reproductive
TRINITY_DN5638_c0_g1_i18	0.000126456	0.0347186	21.81	12.89	18.93	0	0	0	#N/A	#N/A	#N/A	GO:0007165	Up in Non reproductive
TRINITY_DN10352_c0_g1_i2	0.000169984	0.0375082	10.68	14	26	0	0	0	#N/A	#N/A	#N/A	#N/A	Up in Non reproductive
TRINITY_DN34274_c0_g1_i1	0.000138517	0.0355989	14	14.46	24	0	0	0	#N/A	#N/A	#N/A	GO:0046326	Up in Non reproductive
TRINITY_DN1165_c0_g1_i10	0.000168889	0.0375082	34.87	14.54	8.03	0	0	0	#N/A	#N/A	#N/A	GO:0046326	Up in Non reproductive
TRINITY_DN690_c0_g1_i22	0.000260969	0.0462764	30.19	2.98	26.97	0	0	0	#N/A	#N/A	#N/A	GO:0070588	Up in Non reproductive
TRINITY_DN19738_c0_g1_i2	0.000200726	0.0405392	30.5	4.49	28.69	0	0	0	#N/A	#N/A	#N/A	#N/A	Up in Non reproductive
TRINITY_DN1165_c0_g1_i17	0.000261231	0.0462764	37.15	2.93	22.71	0	0	0	#N/A	#N/A	#N/A	GO:0070207	Up in Non reproductive
TRINITY_DN5578_c0_g1_i26	0.000231867	0.0432917	26.32	3.6	35.53	0	0	0	#N/A	#N/A	#N/A	GO:0030435	Up in Non reproductive
TRINITY_DN6769_c0_g1_i4	0.000129141	0.0347186	15.12	16.26	29.9	0	0	0	#N/A	#N/A	#N/A	GO:0045299	Up in Non reproductive
TRINITY_DN1357_c0_g1_i14	0.000118753	0.0347186	40	17.58	11.54	0	0	0	#N/A	#N/A	#N/A	GO:0007399	Up in Non reproductive
TRINITY_DN6260_c0_g1_i7	0.000227375	0.0430275	43	20.59	4.21	0	0	0	#N/A	#N/A	#N/A	GO:1904667	Up in Non reproductive
TRINITY_DN5047_c0_g2_i4	0.000103275	0.0347186	36	13	19.89	0	0	0	#N/A	#N/A	#N/A	GO:0051781	Up in Non reproductive
TRINITY_DN404_c0_g1_i4	0.000279856	0.0473911	9.61	5.53	51.55	0	0	0	#N/A	#N/A	#N/A	GO:0051321	Up in Non reproductive
TRINITY_DN1579_c1_g1_i1	0.000106465	0.0347186	42.56	7.13	29.13	0	0	0	#N/A	#N/A	#N/A	GO:0006955	Up in Non reproductive
TRINITY_DN4692_c0_g1_i51	5,77E+09	0.0283423	34.18	35.36	14.27	0.02	0	0	#N/A	#N/A	#N/A	GO:0043248	Up in Non reproductive
TRINITY_DN5556_c0_g1_i11	7,91E+09	0.029275	14.66	40.29	19.63	0	0	0	#N/A	#N/A	#N/A	GO:0007214	Up in Non reproductive
TRINITY_DN2430_c0_g1_i12	7,43E+08	0.028551	12.41	36.1	28.1	0	0	0	#N/A	#N/A	#N/A	GO:0009611	Up in Non reproductive
TRINITY_DN136_c0_g1_i43	6,17E+09	0.0283423	62.02	17.46	13.33	0	0	0	#N/A	#N/A	#N/A	GO:0045861	Up in Non reproductive
TRINITY_DN27965_c0_g1_i3	3,98E+09	0.0258994	27.31	21	38	0	0	0	#N/A	#N/A	#N/A	GO:0007049	Up in Non reproductive
TRINITY_DN1988_c0_g1_i8	3,75E+09	0.0256137	25.18	34.37	25.57	0	0	0	#N/A	#N/A	#N/A	GO:0006811	Up in Non reproductive
TRINITY_DN1585_c0_g1_i17	0.000169676	0.0375082	39.19	1	60.94	0	0	0	#N/A	#N/A	#N/A	GO:0060760	Up in Non reproductive
TRINITY_DN2400_c0_g1_i7	4,20E+09	0.0258994	4.64	47.13	48.24	0	0	0	#N/A	#N/A	#N/A	GO:0044782	Up in Non reproductive
TRINITY_DN10648_c0_g2_i2	0.000228482	0.0430275	68.05	47.09	0	0	0	0	#N/A	#N/A	#N/A	GO:0051321	Up in Non reproductive
TRINITY_DN1546_c0_g1_i1	5,53E+09	0.0283423	1586.87	59.95	38	0	4	0	#N/A	#N/A	#N/A	GO:0009267	Up in Non reproductive
TRINITY_DN1165_c0_g1_i24	5,66E+08	0.00615894	52.72	20.71	49.26	0	0	0	#N/A	#N/A	#N/A	GO:0009624	Up in Non reproductive
TRINITY_DN3781_c0_g1_i19	0.000179692	0.0388651	58.55	59	0	0	0	0	#N/A	#N/A	#N/A	GO:0009956	Up in Non reproductive
TRINITY_DN6868_c0_g1_i9	0.000160074	0.0371779	105.06	32.06	0	0	0	0	#N/A	#N/A	#N/A	GO:0015031	Up in Non reproductive
TRINITY_DN2015_c0_g1_i20	0.000154028	0.0369228	41.54	76.31	0	0	0	0	#N/A	#N/A	#N/A	GO:0000077	Up in Non reproductive
TRINITY_DN30567_c0_g1_i1	1,76E+09	0.0160014	61.78	3	77.86	0	0	0	#N/A	#N/A	#N/A	#N/A	Up in Non reproductive
TRINITY_DN136_c0_g1_i33	0.000128909	0.0347186	0	57.38	64.64	0	0	0	#N/A	#N/A	#N/A	GO:0006915	Up in Non reproductive
TRINITY_DN34274_c0_g1_i4	1,81E+08	0.00304754	46.03	29.54	72	0	0	0	#N/A	#N/A	#N/A	GO:0001934	Up in Non reproductive
TRINITY_DN10648_c0_g2_i4	0.00012816	0.0347186	129.16	27.32	0	0	0	0	#N/A	#N/A	#N/A	GO:0051321	Up in Non reproductive
TRINITY_DN61_c0_g1_i4	0.000119189	0.0347186	0	54.47	74.86	0	0	0	#N/A	#N/A	#N/A	GO:0046740	Up in Non reproductive
TRINITY_DN21_c1_g1_i4	0.000100781	0.0347186	104.36	48.98	0	0	0	0	#N/A	#N/A	#N/A	GO:0039573	Up in Non reproductive
TRINITY_DN158_c0_g1_i20	5,47E+08	0.00615894	10.45	44.8	98	0	0	0	#N/A	#N/A	#N/A	GO:0048364	Up in Non reproductive
TRINITY_DN1296_c0_g1_i18	9,88E+09	0.0347186	47.04	98	0	0	0	0	#N/A	#N/A	#N/A	GO:0007291	Up in Non reproductive
TRINITY_DN336_c0_g1_i16	0.00026901	0.0470122	0	127.05	4.91	0	0	0	#N/A	#N/A	#N/A	GO:0006672	Up in Non reproductive
TRINITY_DN15341_c0_g1_i2	5,93E+09	0.0283423	120.32	0	90.91	0	0	0	#N/A	#N/A	#N/A	GO:0002250	Up in Non reproductive
TRINITY_DN1617_c0_g1_i25	8,76E+06	0.00212608	115.73	64.07	31.06	0	0	0	#N/A	#N/A	#N/A	GO:0001666	Up in Non reproductive
TRINITY_DN336_c0_g1_i20	0.000148101	0.0366124	0	172.93	16.46	0	0	0	#N/A	#N/A	#N/A	GO:0006672	Up in Non reproductive
TRINITY_DN61_c0_g1_i3	7,50E+09	0.028551	0	85.61	116.34	0	0	0	#N/A	#N/A	#N/A	GO:0034605	Up in Non reproductive
TRINITY_DN23757_c0_g1_i4	3,68E+09	0.0256137	20.69	166.49	2	0	0	0	#N/A	#N/A	#N/A	GO:0075512	Up in Non reproductive
TRINITY_DN21_c1_g1_i8	6,74E+09	0.0283423	107.6	113.8	0	0	0	0	#N/A	#N/A	#N/A	GO:0098671	Up in Non reproductive
TRINITY_DN688_c0_g1_i5	2,83E+08	0.0228792	1	117.01	86.93	0	0	0	#N/A	#N/A	#N/A	GO:0046718	Up in Non reproductive
TRINITY_DN1003_c0_g1_i9	4,95E+07	0.00183411	80.58	65.77	91.45	0	0	0	#N/A	#N/A	#N/A	GO:0039526	Up in Non reproductive
TRINITY_DN485_c0_g1_i1	5,49E+07	0.00183411	145.99	51.88	68.79	0	0	0	#N/A	#N/A	#N/A	GO:0051301	Up in Non reproductive
TRINITY_DN688_c0_g1_i18	7,48E+09	0.028551	0	111.98	122.89	0	0	0	#N/A	#N/A	#N/A	GO:0030683	Up in Non reproductive
TRINITY_DN2561_c0_g1_i7	1,50E+08	0.00298065	83.87	139.94	28.41	0	0	0	#N/A	#N/A	#N/A	GO:0030435	Up in Non reproductive
TRINITY_DN21855_c0_g1_i2	2,02E+09	0.017687	32.12	198.13	4	0	0	0	#N/A	#N/A	#N/A	GO:0001172	Up in Non reproductive
TRINITY_DN8329_c0_g1_i2	6,30E+07	0.00183411	110.4	59.87	155.52	0	0	0.01	#N/A	#N/A	#N/A	GO:0015031	Up in Non reproductive
TRINITY_DN105_c0_g1_i32	6,86E+09	0.0283423	0	172.02	173.3	0	0	0	#N/A	#N/A	#N/A	GO:0030421	Up in Non reproductive
TRINITY_DN268_c0_g1_i8	3,17E+08	0.0244682	0	0	0	0	342.27	270.54	#N/A	#N/A	#N/A	GO:0039573	Up in Females with Larvae
TRINITY_DN16548_c0_g1_i22	0.000120386	0.0347186	0	0	0	844.36	3.37	0	#N/A	#N/A	#N/A	#N/A	Up in Females with Larvae
TRINITY_DN276_c0_g1_i14	4,27E+09	0.0258994	0	0	0	13.25	1220.44	0	#N/A	#N/A	#N/A	GO:0015031	Up in Females with Larvae
TRINITY_DN178_c0_g1_i23	4,77E+07	0.00183411	0	0	0	1664.08	0.13	2094.55	#N/A	#N/A	#N/A	GO:0007165	Up in Females with Larvae
TRINITY_DN12041_c0_g1_i16	0.00020465	0.0405392	0	0	0	13.29	11.5	12.28	#N/A	#N/A	#N/A	GO:0075528	Up in Females with Larvae
TRINITY_DN710_c0_g1_i14	0.000309213	0.0495925	0	0	0	11.85	5.37	19.71	#N/A	#N/A	#N/A	GO:0030517	Up in Females with Larvae
TRINITY_DN1571_c0_g2_i13	0.000202546	0.0405392	0	0	0	9.87	15.87	12.83	#N/A	#N/A	#N/A	GO:0007165	Up in Females with Larvae
TRINITY_DN15343_c3_g1_i2	0.000207846	0.0405392	0	0	0	17	8	15	#N/A	#N/A	#N/A	#N/A	Up in Females with Larvae
TRINITY_DN8715_c0_g1_i9	0.000255073	0.0462764	0	0	0	16.12	15.65	6.13	#N/A	#N/A	#N/A	GO:0006914	Up in Females with Larvae
TRINITY_DN2443_c0_g1_i38	0.0003074	0.0495925	0	0	0	15.73	18.64	4.29	#N/A	#N/A	#N/A	GO:0042742	Up in Females with Larvae
TRINITY_DN608_c4_g1_i15	0.000279389	0.0473911	0	0	0	8.95	22.07	7.17	#N/A	#N/A	#N/A	GO:1904667	Up in Females with Larvae
TRINITY_DN11135_c0_g1_i3	0.000189618	0.0397188	0	0	0	14	11	14	#N/A	#N/A	#N/A	GO:0006448	Up in Females with Larvae
TRINITY_DN11938_c0_g1_i74	0.000210336	0.0406618	0	0	0	16.76	15.59	7.88	#N/A	#N/A	#N/A	GO:0010628	Up in Females with Larvae
TRINITY_DN11181_c0_g3_i4	0.000167531	0.0375082	0	0	0	17	11.09	13.2	#N/A	#N/A	#N/A	GO:0050830	Up in Females with Larvae
TRINITY_DN5317_c0_g2_i8	0.00018542	0.0393253	0	0	0	18.83	8.59	14.59	#N/A	#N/A	#N/A	GO:0007165	Up in Females with Larvae
TRINITY_DN24_c0_g1_i7	0.000239595	0.0443555	0	0	0	22.57	5.9	13.89	#N/A	#N/A	#N/A	GO:0018108	Up in Females with Larvae
TRINITY_DN195_c0_g2_i6	0.000207842	0.0405392	0	0	0	21.3	7.49	13.92	#N/A	#N/A	#N/A	GO:0006952	Up in Females with Larvae
TRINITY_DN5179_c0_g1_i7	0.000190912	0.0397188	0	0	0	8.34	19.02	15.36	#N/A	#N/A	#N/A	GO:0045444	Up in Females with Larvae
TRINITY_DN715_c1_g1_i12	0.000157864	0.0370811	0	0	0	18.76	13.02	11.94	#N/A	#N/A	#N/A	GO:0007165	Up in Females with Larvae
TRINITY_DN455_c2_g1_i2	0.0001732	0.0378355	0	0	0	20.98	10.06	12.98	#N/A	#N/A	#N/A	GO:0039502	Up in Females with Larvae
TRINITY_DN1984_c0_g2_i17	0.000248091	0.0455425	0	0	0	5.37	25.89	14	#N/A	#N/A	#N/A	GO:1902600	Up in Females with Larvae
TRINITY_DN199_c0_g1_i55	0.000132811	0.0349549	0	0	0	21.69	13.34	13.48	#N/A	#N/A	#N/A	GO:0048239	Up in Females with Larvae
TRINITY_DN1480_c0_g1_i15	0.0001555	0.0369228	0	0	0	28.35	9.06	13.32	#N/A	#N/A	#N/A	GO:0030683	Up in Females with Larvae
TRINITY_DN130_c0_g1_i1	0.000286265	0.0477003	0	0	0	12.36	34.55	3.84	#N/A	#N/A	#N/A	GO:0035915	Up in Females with Larvae
TRINITY_DN8059_c0_g1_i8	0.000125466	0.0347186	0	0	0	15.1	12	24.97	#N/A	#N/A	#N/A	GO:0007417	Up in Females with Larvae
TRINITY_DN4568_c0_g1_i4	0.000107552	0.0347186	0	0	0	23	13.08	21.02	#N/A	#N/A	#N/A	GO:0043086	Up in Females with Larvae
TRINITY_DN565_c0_g1_i7	0.000125788	0.0347186	0.59	0	0	52.14	1.02	86.14	#N/A	#N/A	#N/A	GO:0009267	Up in Females with Larvae
TRINITY_DN2296_c0_g1_i10	4,66E+08	0.00565923	0	0	0.72	47.4	72.22	46.18	#N/A	#N/A	#N/A	GO:0039557	Up in Females with Larvae
TRINITY_DN1429_c1_g1_i4	9,91E+09	0.0347186	0	0	0	21.57	19	17.37	#N/A	#N/A	#N/A	GO:0006313	Up in Females with Larvae
TRINITY_DN872_c1_g1_i32	0.000154136	0.0369228	0	0	0	22.45	29.16	6.81	#N/A	#N/A	#N/A	GO:0099048	Up in Females with Larvae
TRINITY_DN21_c1_g1_i16	7,58E+09	0.028551	0	0	0.5	77.82	1.5	70.93	#N/A	#N/A	#N/A	GO:0046718	Up in Females with Larvae
TRINITY_DN21876_c0_g1_i17	6,88E+08	0.0283423	0	0	0	32.79	16.87	20.44	#N/A	#N/A	#N/A	GO:0002250	Up in Females with Larvae
TRINITY_DN127_c1_g1_i16	6,63E+09	0.0283423	0	0	0	32.37	16.28	22.77	#N/A	#N/A	#N/A	GO:1903401	Up in Females with Larvae
TRINITY_DN1513_c0_g1_i15	4,66E+09	0.0267662	0	0	0	21.78	34.29	21.16	#N/A	#N/A	#N/A	GO:0030420	Up in Females with Larvae
TRINITY_DN1828_c1_g1_i59	0.000106216	0.0347186	0	0	0	37.05	4.7	36.5	#N/A	#N/A	#N/A	GO:0007399	Up in Females with Larvae
TRINITY_DN2561_c0_g1_i26	0.000137083	0.0355989	0	0	0	29	2	56	#N/A	#N/A	#N/A	#N/A	Up in Females with Larvae
TRINITY_DN12292_c0_g1_i11	2,74E+09	0.0228792	0	0	0	46.96	19.26	23.76	#N/A	#N/A	#N/A	GO:0019058	Up in Females with Larvae
TRINITY_DN46198_c0_g1_i1	3,70E+09	0.0256137	0	0	0	33	48	10	#N/A	#N/A	#N/A	GO:0009965	Up in Females with Larvae
TRINITY_DN3671_c0_g1_i28	4,18E+09	0.0258994	0	0	0	45.81	46.42	5.62	#N/A	#N/A	#N/A	GO:0030154	Up in Females with Larvae
TRINITY_DN5155_c0_g1_i4	0.000313288	0.0495925	0	0	0	42.94	55.73	0	#N/A	#N/A	#N/A	GO:0006417	Up in Females with Larvae
TRINITY_DN4692_c0_g1_i36	1,25E+09	0.0119104	0	0	0	33.43	37.91	26.89	#N/A	#N/A	#N/A	GO:0043473	Up in Females with Larvae
TRINITY_DN3671_c0_g1_i14	6,77E+09	0.0283423	0	0	0	2	54.68	44.43	#N/A	#N/A	#N/A	GO:0007283	Up in Females with Larvae
TRINITY_DN6688_c0_g1_i28	0.00022601	0.0430275	0	0	0	0	47.23	56.55	#N/A	#N/A	#N/A	GO:0006281	Up in Females with Larvae
TRINITY_DN188_c1_g2_i3	5,92E+07	0.00615894	0	0	0	38	25.52	47	#N/A	#N/A	#N/A	#N/A	Up in Females with Larvae
TRINITY_DN891_c0_g1_i9	0.000145588	0.036556	0	0	0	70	50.1	0	#N/A	#N/A	#N/A	GO:0045299	Up in Females with Larvae
TRINITY_DN10648_c0_g1_i18	0.000142301	0.036146	0	0	0	57.65	0	61	#N/A	#N/A	#N/A	GO:0016032	Up in Females with Larvae
TRINITY_DN5678_c0_g1_i3	0.000130324	0.0347186	0	0	0	57.51	0	63.3	#N/A	#N/A	#N/A	GO:0051301	Up in Females with Larvae
TRINITY_DN964_c0_g1_i3	0.00011558	0.0347186	0	0	0	56	0	67.83	#N/A	#N/A	#N/A	GO:1900818	Up in Females with Larvae
TRINITY_DN6688_c0_g1_i14	0.000120304	0.0347186	0	0	0	0	70.75	50.3	#N/A	#N/A	#N/A	GO:0019046	Up in Females with Larvae
TRINITY_DN58578_c0_g1_i2	0.000120349	0.0347186	0	0	0	0	74	47.75	#N/A	#N/A	#N/A	GO:0110134	Up in Females with Larvae
TRINITY_DN437_c0_g1_i19	1,29E+08	0.0028138	0	0	0	32.18	62.79	48.02	#N/A	#N/A	#N/A	GO:0007157	Up in Females with Larvae
TRINITY_DN3197_c0_g2_i7	0.000126537	0.0347186	0	0	0	135.09	0	18.23	#N/A	#N/A	#N/A	GO:0045185	Up in Females with Larvae
TRINITY_DN7085_c0_g1_i3	1,75E+08	0.00304754	0	0	0	93.54	21.49	42.14	#N/A	#N/A	#N/A	GO:0006351	Up in Females with Larvae
TRINITY_DN136425_c0_g1_i1	6,49E+09	0.0283423	0	0	0	105	68	0	#N/A	#N/A	#N/A	GO:0071816	Up in Females with Larvae
TRINITY_DN1617_c0_g1_i59	5,71E+07	0.00183411	0	0	0	57.8	63.11	50.47	#N/A	#N/A	#N/A	GO:0046688	Up in Females with Larvae
TRINITY_DN376_c4_g1_i11	3,02E+08	0.00412827	0	0	0	22.16	24.32	123.15	#N/A	#N/A	#N/A	GO:0030683	Up in Females with Larvae
TRINITY_DN3035_c0_g1_i17	2,89E+08	0.00412827	0	0	0	92	9.91	76	#N/A	#N/A	#N/A	#N/A	Up in Females with Larvae
TRINITY_DN4209_c0_g1_i6	3,25E+09	0.0244682	0	0	0	0.5	83.63	88.64	#N/A	#N/A	#N/A	GO:0000165	Up in Females with Larvae
TRINITY_DN1681_c0_g1_i4	4,14E+08	0.00531577	0	0	0	115.36	80.61	6.86	#N/A	#N/A	#N/A	GO:0044662	Up in Females with Larvae
TRINITY_DN47492_c0_g1_i2	6,46E+09	0.0283423	0	0	0	0	67.48	132.91	#N/A	#N/A	#N/A	#N/A	Up in Females with Larvae
TRINITY_DN188_c1_g1_i21	6,58E+09	0.0283423	0	0	0	0	69.14	136.38	#N/A	#N/A	#N/A	#N/A	Up in Females with Larvae
TRINITY_DN2785_c0_g1_i19	6,05E+09	0.0283423	0	0	0	0	118.23	115.77	#N/A	#N/A	#N/A	GO:0009734	Up in Females with Larvae
TRINITY_DN9002_c0_g1_i1	0.000111274	0.0347186	0	0	0	20.84	219.89	0	#N/A	#N/A	#N/A	GO:1904667	Up in Females with Larvae
TRINITY_DN4406_c0_g1_i3	7,24E+09	0.028551	0	0	0	62.58	200.75	0	#N/A	#N/A	#N/A	GO:0019064	Up in Females with Larvae
TRINITY_DN16548_c0_g1_i2	0.000120215	0.0347186	0	0	0	267.28	19.26	0	#N/A	#N/A	#N/A	#N/A	Up in Females with Larvae
TRINITY_DN188_c0_g1_i5	2,51E+08	0.00392312	0	0	0	14.14	141.46	173.69	#N/A	#N/A	#N/A	GO:1904667	Up in Females with Larvae
TRINITY_DN7980_c0_g1_i21	5,61E+09	0.0283423	0	0	0	198.9	0	167.12	#N/A	#N/A	#N/A	GO:0071952	Up in Females with Larvae
