# Supplementary material for: Phagocytosis of microbial symbionts supports embryonic nutrition in the sponge Halichondria panicea
Source: Research Square preprint supplement (doi:10.21203/rs.3.rs-7749905/v1), 2025-12-02
Supplement: Supplementary file 2 [file 1a51f9617ed68185732b194b.xlsx]

## Sheet: enrichments_males
value percentage	GO term	group
6.66667	cell division	April
20	nitric oxide biosyntethic process	April
6.66667	release from viral latency	April
13.3333	primary metabolic process	April
13.3333	glucose homeostasis	April
6.66667	homeostatic process	April
6.66667	response to stimulus	April
6.66667	viral process	April
6.66667	nitrogen fixation	April
6.66667	cell cycle	April
6.66667	cytolysis	April
38.4615	response to L-glutamate	May
11.5385	disruption of plasma membrane integrity in another organism	May
11.5385	macromolecule metabolic process	May
3.84615	calcium ion homeostasis	May
3.84615	viral process	May
7.69231	hexose biosynthesis	May
3.84615	cell adhesion	May
3.84615	cell cycle	May
7.69231	oxidative phosphorylation	May
3.84615	cell divsion	May
3.84615	establishment of integrated proviral latency	May

## Sheet: enrichments_females
value_percentage	GO term	group
16.6667	cell division	March
50	response to copper ion	March
16.6667	DNA-templated viral transcription	March
16.6667	oxidative phosphorylation	March
31.25	replication fork processing	April
8.69565	photosynthesis	April
4.34783	cell division	April
4.34783	nitric oxide biosyntethic process	April
4.34783	methylation	April
4.34783	intracellular iron ion homeostasis	April
4.34783	response to stimulus	April
4.34783	sterol transport	April
4.34783	release from viral latency	April
4.34783	response to immobilization stress	April
4.34783	modulation of process of another organism	April
12.5	photosynthesis	May
4.16667	cell division	May
4.16667	release from viral latency	May
8.33333	primary metabolic process	May
4.16667	cell cycle	May
54.1667	response to acidic pH	May
4.16667	protein acetylation	May
4.16667	pigmentation	May
25	disruption of plasma membrane integrity in another organism	June
16.6667	ochratoxin A biosynthetic process	June
8.33333	pigmentation	June
8.33333	viral process	June
8.33333	cell division	June
8.33333	photosynthesis	June
8.33333	carbohydrate metabolic process	June
8.33333	cell migration	June
8.33333	release from viral latency	June
