# Supplementary material for: Phagocytosis of microbial symbionts supports embryonic nutrition in the sponge Halichondria panicea
Source: Research Square preprint supplement (doi:10.21203/rs.3.rs-7749905/v1), 2025-12-02
Supplement: Supplementary file 3 [file 25eeef288e777acbdeb1794a.xlsx]

## Sheet: A.MTX_stats
Transcriptome stats
Number of raw reads	580582954
Number of filtered reads	85971899
Number of transcripts	328161
N50	1488
Transcripts identified as MICROBES (Archaea+Bacteria+Fungi+Viruses)	58940
Transcripts identified as BACTERIA	9390
Transcripts identified as ARCHAEA	390
Transcripts identified as Candidatus H. symbioticus	3090
Transcripts identified as Eukarya	94909
Transcripts identified as METAZOA	75373
Mapping statistics (unique mapping, no mismatches)
Total number of reads mapped to the transcriptome	56785656
Average number of reads mapped per sample	1.97892e+06
Number of reads mapped to Metazoa	3.22192e+07
Number of reads mapped to Microbes	17040373
Number of reads mapped to Bacteria	9.19711e+06
Number of reads mapped to Archaea	234983
Number of reads mapped to Ca. H. symbioticus	1.28534e+06
Number of reads mapped to unassigned transcripts	7.52608e+06
BUSCO 5 (METAZOA 954 genes)
Complete	892
Complete +Partial	917
Duplicated (%)	84.19

## Sheet: B.Reads
Samples for RNAseq					Raw reads			Filtered reads (Trimmomatic+SortmeRNA)
Sample name	Label seq		Month	Reproductive element	Unique	Duplicated	Total	Unique	Duplicated	Total	% of retained reads	Mapped Reads (Counts)	% Mapped reads (from retained)
Hp_16	A	1	March	NR	5150145	25361198	30511343	992496	1208399	2200895	7.21337	1375889	62.515
Hp_17	B	1	March	NR	3637921	9170591	12808512	1086996	1308838	2395834	18.705	1520058	63.4459
Hp_20	C	1	March	mid oocytes	5815894	22975842	28791736	1450890	1894347	3345237	11.6187	2070033	61.88
Hp_26	F	2	March	mid oocytes	5202427	12396527	17598954	1529018	1707357	3236375	18.3896	2152797	66.5188
Hp_27	D	1	March	mid oocytes	4735481	13902453	18637934	1175134	1551465	2726599	14.6293	1702070	62.4247
Hp_30	E	1	March	mid oocytes	5047888	26318708	31366596	1168492	1547343	2715835	8.65837	1683485	61.9877
Hp_31	G	2	April	late oocytes	4237513	8856004	13093517	1288125	1229725	2517850	19.2297	1732917	68.8253
Hp_33	H	2	April	late oocytes	3194897	5575943	8770840	989549	758379	1747928	19.9289	1135157	64.943
Hp_35	B	3	April	late oocytes	3470509	6726461	10196970	1052245	948205	2000450	19.6181	1392031	69.5859
Hp_37	C	3	April	late oocytes	3706399	6263168	9969567	1132348	958143	2090491	20.9687	1420575	67.9541
Hp_40	D	3	April	sperm	3225055	5448287	8673342	787448	701015	1488463	17.1614	1014086	68.1297
Hp_41	E	3	April	sperm	7151927	13853806	21005733	2251056	2145816	4396872	20.9318	3108609	70.7005
Hp_42	F	3	April	sperm	6333170	12613757	18946927	1918768	1775060	3693828	19.4957	2587776	70.0568
Hp_43	G	3	April	sperm	4342226	8129282	12471508	1380246	1255250	2635496	21.1321	1832782	69.5422
Hp_58	C	2	May	early_embryos	4026243	19371668	23397911	910774	1830255	2741029	11.7148	1754671	64.015
Hp_48	G	1	May	late oocytes	5639475	23039776	28679251	1603267	2601511	4204778	14.6614	2685333	63.8638
Hp_46	H	3	May	early and mid_embryos	5677920	17071730	22749650	1864396	2826043	4690439	20.6176	3174515	67.6806
Hp_52	H	1	May	early and mid_embryos	3014122	19765573	22779695	332430	284291	616721	2.70733	376368	61.0273
Hp_53	A	2	May	early and mid_embryos	4356117	23716281	28072398	816578	1305684	2122262	7.55996	1308698	61.6652
Hp_47	F	1	May	sperm	5763901	21506851	27270752	1487270	2057446	3544716	12.9982	2286333	64.4998
Hp_50	A	4	May	sperm	3618745	7542362	11161107	1052109	1140548	2192657	19.6455	1492839	68.0836
Hp_55	B	2	May	sperm	5944904	26330876	32275780	1592361	2209184	3801545	11.7783	2511398	66.0626
Hp_56	B	4	May	sperm	5431330	15557368	20988698	1532028	2324186	3856214	18.3728	2534690	65.73
Hp_61	D	2	June	NR	5125668	16166226	21291894	1346501	1886782	3233283	15.1855	2083407	64.4363
Hp_66	C	4	June	NR	5781389	14299962	20081351	1884284	2337350	4221634	21.0227	2832298	67.0901
Hp_68	D	4	June	NR	4961839	11993048	16954887	1442398	1907881	3350279	19.76	2207880	65.9014
Hp_69	E	2	June	late embryos/larvae	6019359	22453244	28472603	1545198	1915849	3461047	12.1557	2330130	67.3244
Hp_71	E	4	June	late embryos/larvae	4860092	11154592	16014684	1474215	1847971	3322186	20.7446	2219840	66.8187
Hp_74	F	4	June	late embryos/larvae	4688108	12860706	17548814	1410373	2010583	3420956	19.4939	2258991	66.0339

## Sheet: C. RSEM Metazoa
Contig	Hp_16	Hp_17	Hp_26	Hp_20	Hp_27	Hp_30	Hp_43	Hp_35	Hp_31	Hp_33	Hp_37	Hp_40	Hp_41	Hp_42	Hp_58	Hp_48	Hp_53	Hp_52	Hp_46	Hp_47	Hp_50	Hp_55	Hp_56	Hp_66	Hp_61	Hp_69	Hp_68	Hp_71	Hp_74	Hp_L1	Hp_L2		Description
TRINITY_DN54186_c0_g1_i1	0	0	0	0	0	0	0	0	0	0	0	0	0	0	4	0	0	0	0	0	0	0	0	0	0	0	0	0	0	0	0		ZZZ3	MOUSEZZ-type zinc finger-containing protein 3 OS=Mus musculus OX=10090 GN=Zzz3 PE=1 SV=2
TRINITY_DN13582_c0_g1_i19	2.36	0	1.63	0	0	0	0	0	0	0	3.59	1.33	2.1	0	0	0	0	0	0	0	3	0	0	2.44	0	0	0	0	2	2	0		ZZZ3	HUMANZZ-type zinc finger-containing protein 3 OS=Homo sapiens OX=9606 GN=ZZZ3 PE=1 SV=1
TRINITY_DN45103_c0_g1_i1	0	0	0	0	2	0	0	0	0	0	0	0	0	0	0	0	0	0	0	0	0	0	0	0	0	0	0	0	0	0	0		ZZZ3	HUMANZZ-type zinc finger-containing protein 3 OS=Homo sapiens OX=9606 GN=ZZZ3 PE=1 SV=1
TRINITY_DN13582_c0_g1_i20	2	1	0	0	0	1.25	0	0	1	0	0	0	0	0	0	0	1.75	0	0	0	0	0	0	0	1.28	0	1.56	0	0	0	2.57		ZZZ3	HUMANZZ-type zinc finger-containing protein 3 OS=Homo sapiens OX=9606 GN=ZZZ3 PE=1 SV=1
TRINITY_DN13582_c0_g1_i15	0	9	10.08	13.39	2.69	10.44	6	4	0	2.86	2.41	3.63	16.06	10	0	4	1.57	0	5	11	0	18	4.54	9.56	7.6	14	3.44	8	0	0	9.43		ZZZ3	HUMANZZ-type zinc finger-containing protein 3 OS=Homo sapiens OX=9606 GN=ZZZ3 PE=1 SV=1
TRINITY_DN13582_c0_g1_i23	5.64	0	1.29	2.61	1.31	1.31	0	0	0	1.14	0	2.03	2.83	1	0	0	3.69	0	0	0	0	0	1.46	0	1.12	0	0	0	0	0	0		ZZZ3	HUMANZZ-type zinc finger-containing protein 3 OS=Homo sapiens OX=9606 GN=ZZZ3 PE=1 SV=1
TRINITY_DN43300_c0_g2_i1	0	0	0	0	0	0	0	0	0	0	0	0	0	0	225	0	0	0	0	0	0	0	0	0	0	0	0	0	0	0	0		ZZEF1	MOUSEZinc finger ZZ-type and EF-hand domain-containing protein 1 OS=Mus musculus OX=10090 GN=Zzef1 PE=1 SV=2
TRINITY_DN51694_c0_g1_i1	1	0	0	0	0	0	0	0	2	0	0	0	0	0	0	0	0	0	0	0	0	0	0	0	0	0	0	0	0	0	1		ZZEF1	MOUSEZinc finger ZZ-type and EF-hand domain-containing protein 1 OS=Mus musculus OX=10090 GN=Zzef1 PE=1 SV=2
TRINITY_DN1526_c0_g1_i5	0	0	27.13	22.42	22.28	43.6	32.46	23.4	0	0	0	0	0	0	0	20.38	0	0	0	0	0	49.47	103.56	60.42	21.87	45.31	23.17	0	38.98	0	0		ZZEF1	MOUSEZinc finger ZZ-type and EF-hand domain-containing protein 1 OS=Mus musculus OX=10090 GN=Zzef1 PE=1 SV=2
TRINITY_DN1526_c0_g1_i9	0	10.43	11.13	0	14.5	14.73	11.16	0	5.88	0	8.72	0	34.2	0	0	11.54	0	46.47	14.4	34.7	22.69	28.26	45	6.78	31.6	21.83	17.2	18.23	36.51	7.17	0		ZZEF1	HUMANZinc finger ZZ-type and EF-hand domain-containing protein 1 OS=Homo sapiens OX=9606 GN=ZZEF1 PE=1 SV=6
TRINITY_DN1526_c0_g1_i19	0	0	0	0	84.28	0	80.34	32.37	0	0	44.56	0	0	39.02	0	28.39	0	0	0	0	0	22.84	0	0	0	0	0	0	0	0	100.13		ZZEF1	HUMANZinc finger ZZ-type and EF-hand domain-containing protein 1 OS=Homo sapiens OX=9606 GN=ZZEF1 PE=1 SV=6
TRINITY_DN1526_c0_g1_i7	0	23.98	0	24	0	41.89	0	0	0	0	0	21.74	0.19	0	0	0	0	0	0	0	52.32	113.35	78.47	168.4	44.42	102.99	75.3	49.46	72.34	0	0		ZZEF1	HUMANZinc finger ZZ-type and EF-hand domain-containing protein 1 OS=Homo sapiens OX=9606 GN=ZZEF1 PE=1 SV=6
TRINITY_DN21936_c0_g1_i1	0	0	0	0	0	0	0	0	0	0	0	0	0	0	164.8	0	0	0	0	0	0	0	0	0	0	1	0	0	0	0	0		ZZEF1	HUMANZinc finger ZZ-type and EF-hand domain-containing protein 1 OS=Homo sapiens OX=9606 GN=ZZEF1 PE=1 SV=6
TRINITY_DN1526_c0_g1_i6	25.21	0	27.84	0	0	0	13.22	35.68	31.36	0	49.15	0	24.44	30.29	0	31.53	9.16	0	73.41	34.53	0	0	0	43.28	0	0	17.98	0	0	0	17.02		ZZEF1	HUMANZinc finger ZZ-type and EF-hand domain-containing protein 1 OS=Homo sapiens OX=9606 GN=ZZEF1 PE=1 SV=6
TRINITY_DN1526_c0_g1_i16	432.95	391.28	525.56	468.42	317.31	412.19	468.71	400.69	572.1	440.87	380.99	352.84	1136.25	639.51	47	670.16	334.85	99.53	747.55	673.13	329.63	555.94	415.33	492.27	611.57	756.87	380.17	535.09	400.68	115.89	128.08		ZZEF1	HUMANZinc finger ZZ-type and EF-hand domain-containing protein 1 OS=Homo sapiens OX=9606 GN=ZZEF1 PE=1 SV=6
TRINITY_DN1526_c0_g1_i15	0	0	97.16	89.1	40.75	20.41	41.37	17.84	18.41	15.78	33.14	0	51.43	37.93	0	0	0	0	16	0	34.36	23.85	34.63	16.76	0	0	43.83	18.25	17.78	16.57	14.43		ZZEF1	HUMANZinc finger ZZ-type and EF-hand domain-containing protein 1 OS=Homo sapiens OX=9606 GN=ZZEF1 PE=1 SV=6
TRINITY_DN1526_c0_g1_i20	4.84	12.31	20.17	13.05	9.88	13.18	15.74	9.02	10.24	6.34	17.43	0	40.22	14.26	0	0	4.99	0	8.57	18.14	0	31.3	9.51	44.38	20.55	0	29.24	0	12.7	5.36	5.34		ZZEF1	HUMANZinc finger ZZ-type and EF-hand domain-containing protein 1 OS=Homo sapiens OX=9606 GN=ZZEF1 PE=1 SV=6
TRINITY_DN21936_c0_g1_i2	0	0	0	0	0	0	0	0	0	0	0	0	0	0	41.2	0	0	0	0	0	0	0	0	0	0	1	0	0	0	0	0		ZZEF1	HUMANZinc finger ZZ-type and EF-hand domain-containing protein 1 OS=Homo sapiens OX=9606 GN=ZZEF1 PE=1 SV=6
TRINITY_DN43300_c0_g1_i3	0	0	0	0	0	0	0	0	0	0	0	0	0	0	58	0	0	0	0	0	0	0	0	0	0	0	0	0	0	0	0		ZZEF1	HUMANZinc finger ZZ-type and EF-hand domain-containing protein 1 OS=Homo sapiens OX=9606 GN=ZZEF1 PE=1 SV=6
TRINITY_DN82698_c0_g1_i1	0	0	0	0	0	0	0	0	0	0	0	0	0	0	9	0	0	0	0	0	0	0	0	0	0	1	0	0	0	0	0		ZYG11	CAEELEarly embryogenesis protein zyg-11 OS=Caenorhabditis elegans OX=6239 GN=zyg-11 PE=1 SV=1
TRINITY_DN16031_c0_g1_i1	17	8.87	16	16.68	12	17.59	5.66	4.13	12.26	8	5	17	35	33.57	0	12.12	9	1	15	14.46	21	14	16	8	11	11	14	7	10.98	3	6		ZWILC	XENTRProtein zwilch homolog OS=Xenopus tropicalis OX=8364 GN=zwilch PE=2 SV=1
TRINITY_DN103795_c0_g1_i1	0	0	0	0	0	0	0	0	0	0	0	0	0	0	2	0	0	0	0	0	0	0	0	0	0	0	0	0	0	0	0		ZWILC	XENLAProtein zwilch homolog OS=Xenopus laevis OX=8355 GN=zwilch PE=2 SV=1
TRINITY_DN44160_c0_g1_i1	0	0	0	0	0	0	0	0	0	0	0	0	0	0	1	0	0	0	0	0	0	0	0	0	0	0	0	0	0	0	0		ZW10	RATCentromere/kinetochore protein zw10 homolog OS=Rattus norvegicus OX=10116 GN=Zw10 PE=2 SV=3
TRINITY_DN11349_c0_g1_i2	9	13	16	17	7	16	4	9	12	4	13	17	46	59	1	18	6	1	10	15	22	25	25	13	19	10	11	10	7	2	2		ZW10	HUMANCentromere/kinetochore protein zw10 homolog OS=Homo sapiens OX=9606 GN=ZW10 PE=1 SV=3
TRINITY_DN120805_c0_g1_i1	0	0	0	0	0	0	0	0	0	0	0	0	0	0	0	1	1	0	1	0	2	0	0	0	0	0	0	0	0	0	0		ZUR	MYCTOZinc uptake regulation protein OS=Mycobacterium tuberculosis (strain CDC 1551 / Oshkosh) OX=83331 GN=zur PE=3 SV=1
TRINITY_DN122191_c0_g1_i1	0	0	0	0	0	0	0	0	0	0	0	0	0	0	10	0	0	0	0	0	0	0	0	0	0	0	0	0	0	0	0		ZUO1	SCHPOZuotin OS=Schizosaccharomyces pombe (strain 972 / ATCC 24843) OX=284812 GN=zuo1 PE=1 SV=2
TRINITY_DN63680_c0_g1_i1	0	0	0	0	0	0	0	0	0	0	1	0	0	0	0	0	1	0	0	0	0	0	0	0	0	0	0	0	0	0	0		ZTP50	ARATHPutative zinc transporter At3g08650 OS=Arabidopsis thaliana OX=3702 GN=At3g08650 PE=2 SV=2
TRINITY_DN99279_c0_g1_i1	0	0	0	0	0	0	0	0	0	0	0	0	0	0	0	0	2	0	0	0	0	0	0	0	0	0	0	0	0	0	0		ZSWM8	BOVINZinc finger SWIM domain-containing protein 8 OS=Bos taurus OX=9913 GN=ZSWIM8 PE=2 SV=1
TRINITY_DN11380_c0_g1_i11	0	2.12	2.42	0	3	2	1.03	1.04	1.03	0	2.15	0	3.11	4.09	0	0	2	0	0	3.07	3.11	2.04	1	3.15	1.03	3	0	0	2	0	2		ZSWM7	DANREZinc finger SWIM domain-containing protein 7 OS=Danio rerio OX=7955 GN=zswim7 PE=2 SV=2
TRINITY_DN13611_c0_g1_i31	0	0	0	0	0	1.41	0	0	0	4.72	2.08	0	0	0	0	0	0	0	8.24	1.91	0	0	0	0	0	0	0	0	0.64	1.77	0		ZSWM3	MOUSEZinc finger SWIM domain-containing protein 3 OS=Mus musculus OX=10090 GN=Zswim3 PE=2 SV=1
TRINITY_DN13611_c0_g1_i64	0	5	4	4.2	0	0	0	0	3.05	0	0	2	6.17	0	0	0	0	0	4.93	0	0	0	0	0	0	0	0	0	0	0	0		ZSWM3	MOUSEZinc finger SWIM domain-containing protein 3 OS=Mus musculus OX=10090 GN=Zswim3 PE=2 SV=1
TRINITY_DN13611_c0_g1_i70	0	0	0	0	0	0	1	0	0	0	0	0	0	0	0	0	0	0	0	0	0	0	6.27	9.36	4.45	0	0	2	6.32	0	0		ZSWM3	MOUSEZinc finger SWIM domain-containing protein 3 OS=Mus musculus OX=10090 GN=Zswim3 PE=2 SV=1
TRINITY_DN13611_c0_g1_i55	4	0	0	0	0	0	0	1	0	5.91	0	1	3.81	0	0	0	0	0	0	3.09	0	0	0	0	2.55	2	4	0	0	0	3		ZSWM3	MOUSEZinc finger SWIM domain-containing protein 3 OS=Mus musculus OX=10090 GN=Zswim3 PE=2 SV=1
TRINITY_DN13611_c0_g1_i47	0	0	0	4.8	0	1.59	0	0	7.95	4.36	2.92	0	3.02	3	0	0	7	0	15.83	0	1	5	1.73	22.64	0	0	0	0	0.04	2.23	0		ZSWM3	MOUSEZinc finger SWIM domain-containing protein 3 OS=Mus musculus OX=10090 GN=Zswim3 PE=2 SV=1
TRINITY_DN3567_c0_g2_i3	0	3.63	11.95	1.94	0	4.38	4.62	0	0	0	13	5.22	0	0	0	6.46	2.39	0	0	4.54	11.82	0	0	0	0	0	6.25	0	3.07	18.2	15.52		ZSWM2	MOUSEE3 ubiquitin-protein ligase Zswim2 OS=Mus musculus OX=10090 GN=Zswim2 PE=1 SV=1
TRINITY_DN3567_c0_g2_i4	0	0	0	0	0	0	2.79	0	4.04	0	0	0	6.93	18.32	0	0	0	0	2.99	0	0	5.12	10.08	2.59	7.83	0	0.66	3.63	0	0	2.81		ZSWM2	MOUSEE3 ubiquitin-protein ligase Zswim2 OS=Mus musculus OX=10090 GN=Zswim2 PE=1 SV=1
TRINITY_DN3567_c0_g2_i2	8	0.37	12.19	6.06	13	11.73	5.59	7	18.96	2	0	25.78	64.07	151.6	1	18.54	4.61	1	10.67	16.46	38.18	44.88	40.92	27.76	17.17	22	8.97	30.22	14.93	19.2	28.66		ZSWM2	MOUSEE3 ubiquitin-protein ligase Zswim2 OS=Mus musculus OX=10090 GN=Zswim2 PE=1 SV=1
TRINITY_DN3567_c0_g2_i1	0	0	6.86	0	0	4.89	0	0	0	0	0	0	0	13.08	0	0	0	0	2.35	0	0	0	0	3.65	0	0	7.12	0.16	0	2.6	13.02		ZSWM2	MOUSEE3 ubiquitin-protein ligase Zswim2 OS=Mus musculus OX=10090 GN=Zswim2 PE=1 SV=1
TRINITY_DN31594_c0_g1_i21	0	3	0	0	2	0	0	0	9	0	0	3.69	0	8	0	4.48	0	0	0	0	0	3	0	0	0	5.38	0	0	0	0	0		ZSWM1	HUMANZinc finger SWIM domain-containing protein 1 OS=Homo sapiens OX=9606 GN=ZSWIM1 PE=2 SV=2
TRINITY_DN19988_c0_g1_i1	0	0	0	0	0	0	0	0	0	0	0	0	0	0	21	0	0	0	0	0	0	0	0	0	0	0	0	0	0	0	0		ZSWM1	HUMANZinc finger SWIM domain-containing protein 1 OS=Homo sapiens OX=9606 GN=ZSWIM1 PE=2 SV=2
TRINITY_DN22309_c0_g1_i1	0	0	1	0	0	0	0	0	0	0	0	0	0	0	0	0	0	0	0	0	0	1	0	0	0	0	0	0	0	1	0		ZSCA1	HUMANZinc finger and SCAN domain-containing protein 1 OS=Homo sapiens OX=9606 GN=ZSCAN1 PE=1 SV=2
TRINITY_DN15911_c0_g1_i1	0	0	0	1.39	1	0	0	0	0	0.81	0	0	0	0	0	0	0	0	1.4	2.27	0	0	0	0	0	1	0	0	0	5.69	3.13		ZSC9	HUMANZinc finger and SCAN domain-containing protein 9 OS=Homo sapiens OX=9606 GN=ZSCAN9 PE=1 SV=1
TRINITY_DN15911_c0_g1_i3	0	0	0	0	0	0	0	0	0	0	0	1.82	0	0	0	0	0.07	1	0	0	0	0	0	0	2.85	0	0	3.12	0	8.28	13.99		ZSC9	HUMANZinc finger and SCAN domain-containing protein 9 OS=Homo sapiens OX=9606 GN=ZSCAN9 PE=1 SV=1
TRINITY_DN15911_c0_g1_i12	0	0	0	0	0	0	0	0	0	0	0	0	2.66	3.97	0	3.98	0	0	0	0	0	0	0	0	2.31	0	2.52	0	0	30.82	43.04		ZSC9	HUMANZinc finger and SCAN domain-containing protein 9 OS=Homo sapiens OX=9606 GN=ZSCAN9 PE=1 SV=1
TRINITY_DN11451_c0_g1_i1	0	0	0	0	0	0	0	0	0	0	0	0	0	0	0	0	0	0	0	0	0	0	0	4	0	0	0	0	0	0	0		ZSC32	HUMANZinc finger and SCAN domain-containing protein 32 OS=Homo sapiens OX=9606 GN=ZSCAN32 PE=1 SV=3
TRINITY_DN15911_c0_g1_i9	0	0	0	0	0	0	1.45	0	0	0	0	0	0	0	0	0	2.65	0	0	0	0.83	0	1	0	0	0	0	5.6	2.62	12.13	12.35		ZSC31	HUMANZinc finger and SCAN domain-containing protein 31 OS=Homo sapiens OX=9606 GN=ZSCAN31 PE=1 SV=2
TRINITY_DN8847_c0_g1_i10	1	0	0	1	1	0	0	0	0	0	0	1	1	0	0	0	0	0	0	0	0	0	0	0	0	0.37	0	0	1.4	0	1		ZSC29	HUMANZinc finger and SCAN domain-containing protein 29 OS=Homo sapiens OX=9606 GN=ZSCAN29 PE=1 SV=2
TRINITY_DN1366_c0_g2_i11	34.12	59.39	59.17	50.22	24.67	39.65	32.66	14.21	17.14	1.6	10.18	8.8	4.06	6.34	0	8.53	69.28	0	4.37	13.63	12.73	45.16	4.51	12.04	16.66	23.37	41.3	19.24	15.47	14.73	13.99		ZSC20	MOUSEZinc finger and SCAN domain-containing protein 20 OS=Mus musculus OX=10090 GN=Zscan20 PE=2 SV=2
TRINITY_DN165_c1_g1_i18	0	0	1.81	1.22	0.98	8.05	0.84	4.41	9.08	0	0	2.23	12.17	4.02	0	56.39	0.16	12.25	5.13	7.05	1.08	3.9	3.8	26.26	6.35	11.3	0	0	4.22	0	6.13		ZSC16	HUMANZinc finger and SCAN domain-containing protein 16 OS=Homo sapiens OX=9606 GN=ZSCAN16 PE=1 SV=2
TRINITY_DN6790_c0_g2_i6	2.11	7.26	1.95	9.59	1	3.67	5.84	2.4	0	7.31	0	0	0	3.79	0	0	0	0	3.41	0	0	10	0	12.88	11.72	5.53	0	2.03	13.75	2.75	0		ZSC16	HUMANZinc finger and SCAN domain-containing protein 16 OS=Homo sapiens OX=9606 GN=ZSCAN16 PE=1 SV=2
TRINITY_DN22926_c0_g1_i14	0	0	0	0	1	1.63	1	2	0	0	1.56	0	1	0	0	4	0	0	3	0	2	0	0	4.53	3	0	0	9	4	2	0		ZSC16	HUMANZinc finger and SCAN domain-containing protein 16 OS=Homo sapiens OX=9606 GN=ZSCAN16 PE=1 SV=2
TRINITY_DN165_c1_g1_i11	0	0	0	0	0	0	3.6	9.32	12.46	0	0	0	13.1	0	0	0	0	0	0	0.45	28.58	0	44.42	0	0.03	5.46	0	0	0	0	3.23		ZSC16	HUMANZinc finger and SCAN domain-containing protein 16 OS=Homo sapiens OX=9606 GN=ZSCAN16 PE=1 SV=2
TRINITY_DN165_c1_g1_i22	2	3.43	0	0	0	17.44	0	0	0.85	0	0	0.1	0	0	0	11.25	0	1.21	54.86	6.61	2.23	39.62	34.92	39.29	0	0	3.67	0	0	0	0		ZSC16	HUMANZinc finger and SCAN domain-containing protein 16 OS=Homo sapiens OX=9606 GN=ZSCAN16 PE=1 SV=2
TRINITY_DN6790_c0_g2_i4	0	0	0	0.09	0	0	0	0	0	4.58	1.81	0	0	0	0	0	0	0	0	0	2	0	0	0	0	2.15	0	0	0	0	0		ZSC16	HUMANZinc finger and SCAN domain-containing protein 16 OS=Homo sapiens OX=9606 GN=ZSCAN16 PE=1 SV=2
TRINITY_DN165_c1_g1_i27	0	0	0	1.28	2.51	2.4	0	0	0	1.7	0	0	15.31	21.13	1.72	95.31	6.42	2.21	141.38	59.35	0	26.37	12.58	104.93	0	0.52	4.04	13.38	14.51	0	0		ZSC16	HUMANZinc finger and SCAN domain-containing protein 16 OS=Homo sapiens OX=9606 GN=ZSCAN16 PE=1 SV=2
TRINITY_DN165_c1_g1_i7	0	3.08	0	0	3	6.66	5.99	0	4.51	2	0	2	28	7.91	0	47.54	1.21	3.07	134.1	13.28	5.36	9.57	42.47	61.67	0	6.91	0	0	3.18	1	2		ZSC16	HUMANZinc finger and SCAN domain-containing protein 16 OS=Homo sapiens OX=9606 GN=ZSCAN16 PE=1 SV=2
TRINITY_DN22926_c0_g1_i17	0	0	2.54	0	0	0	0	0	0	0	0	0	0	0	0	0	0	1	0	0	0	0	0	0	0	2.56	4	0	0	0	0		ZSC16	HUMANZinc finger and SCAN domain-containing protein 16 OS=Homo sapiens OX=9606 GN=ZSCAN16 PE=1 SV=2
TRINITY_DN3832_c0_g1_i21	0	0	26.64	0	0	0	0	0	0	0	0	0	0	0	0	0	0	0	25.6	19.43	0	0	0	0	0	0	0	0	29.49	0	0		ZRN1B	DANREUbiquitin thioesterase zranb1-B OS=Danio rerio OX=7955 GN=zranb1b PE=2 SV=1
TRINITY_DN45695_c0_g1_i1	2	2	0	0	0	0	2	0	2	0	0	0	0	2	0	0	0	0	0	0	0	3	0	0	0	0	0	0	0	0	0		ZRAN1	BOVINUbiquitin thioesterase ZRANB1 OS=Bos taurus OX=9913 GN=ZRANB1 PE=1 SV=1
TRINITY_DN16653_c0_g1_i1	86.72	24.54	87.8	135.08	61.21	76.33	14.17	9.8	1.05	0	27.77	9.62	36.3	0	2	26.96	11.4	16.96	66.71	0	0	46.57	7.89	8.76	52.05	60.11	46.65	26.59	33.16	5.7	1.2		ZRAB2	CHICKZinc finger Ran-binding domain-containing protein 2 OS=Gallus gallus OX=9031 GN=ZRANB2 PE=2 SV=1
TRINITY_DN16653_c0_g1_i15	12.74	31.93	32.14	16.56	13.55	8.06	43.32	23.34	57.95	38	0	0	47.97	46.03	0	21.7	29	0	10.29	47.24	43.68	22.43	43.43	103.92	19.07	0	27.7	38.41	39.84	4.3	0		ZRAB2	CHICKZinc finger Ran-binding domain-containing protein 2 OS=Gallus gallus OX=9031 GN=ZRANB2 PE=2 SV=1
TRINITY_DN16653_c0_g1_i10	0	15.54	11.86	8.13	31.24	6.73	0	20.85	0	0	11.64	19.38	14.28	11.17	0	0	0	0	0	0	0	0	0	0	0	0	16.47	0	0	0	0		ZRAB2	CHICKZinc finger Ran-binding domain-containing protein 2 OS=Gallus gallus OX=9031 GN=ZRANB2 PE=2 SV=1
TRINITY_DN120082_c0_g1_i1	0	0	0	0	0	0	0	0	0	0	0	0	0	0	9	0	0	0	0	0	0	0	0	0	0	0	0	0	0	0	0		ZRAB2	CHICKZinc finger Ran-binding domain-containing protein 2 OS=Gallus gallus OX=9031 GN=ZRANB2 PE=2 SV=1
TRINITY_DN16653_c0_g1_i11	13.09	0	9.19	8.22	0	7.39	8.51	0	0	0	6.59	0	0	0	0	0	0	0	0	0	0	0	0	11.95	0	0	0	0	0	0	0		ZRAB2	CHICKZinc finger Ran-binding domain-containing protein 2 OS=Gallus gallus OX=9031 GN=ZRANB2 PE=2 SV=1
TRINITY_DN16653_c0_g1_i7	0.45	0	0	0	0	8.5	0	0	0	0	0	0	18.45	6.8	0	10.34	9.6	5.04	0	12.76	2.32	0	2.68	3.36	0.88	0.89	0.18	0	0	0	1.8		ZRAB2	CHICKZinc finger Ran-binding domain-containing protein 2 OS=Gallus gallus OX=9031 GN=ZRANB2 PE=2 SV=1
TRINITY_DN53636_c0_g2_i1	0	0	0	0	0	0	0	0	0	0	0	0	0	0	21	0	0	0	0	0	0	0	0	0	0	0	0	0	0	0	0		ZPR1	PAPANZinc finger protein ZPR1 OS=Papio anubis OX=9555 GN=ZNF259 PE=3 SV=1
TRINITY_DN53636_c0_g1_i1	0	0	0	0	0	0	0	0	0	0	0	0	0	0	14	0	0	0	0	0	0	0	0	0	0	0	0	0	0	0	0		ZPR1	PAPANZinc finger protein ZPR1 OS=Papio anubis OX=9555 GN=ZNF259 PE=3 SV=1
TRINITY_DN2590_c0_g1_i27	0	0	0	0	66.44	0	0	19.67	0	0	0	0	44.88	44.54	0	23.8	0	0	0	0	0	0	31.35	21.08	0	0	15.84	0	0	0	0		ZPR1	MOUSEZinc finger protein ZPR1 OS=Mus musculus OX=10090 GN=Zpr1 PE=1 SV=1
TRINITY_DN2590_c0_g1_i8	0	5.27	0	0	0	0	0	3.62	2.24	0	3.17	3.39	2.41	0	0	0	0	0	2.33	0	0	0	0	0	2.73	0	2.83	0	0	3.11	0		ZPR1	MOUSEZinc finger protein ZPR1 OS=Mus musculus OX=10090 GN=Zpr1 PE=1 SV=1
TRINITY_DN2590_c0_g1_i62	0	5.38	3.63	4	2.42	3.95	2.99	0	0	2.27	0	0	1.71	0	0	1.51	0	0	0	1.36	1.48	0	0	3.55	0	0	2.82	1.43	0	1.4	3.6		ZPR1	MOUSEZinc finger protein ZPR1 OS=Mus musculus OX=10090 GN=Zpr1 PE=1 SV=1
TRINITY_DN2590_c0_g1_i69	2.98	5.91	10.01	13.19	0	3.5	4.21	0	15.87	4.09	0	0	16.33	22.74	0	0	0	0	5.57	4.48	0	0	20.03	14.84	13.36	6.11	22.44	0.77	8.13	10.33	0.05		ZPR1	MOUSEZinc finger protein ZPR1 OS=Mus musculus OX=10090 GN=Zpr1 PE=1 SV=1
TRINITY_DN2590_c0_g1_i13	0	33.59	47.28	0	0	0	16.75	30.06	0	0	52.55	0	71.68	113.14	0	0	0	0	0	48.93	0	67.63	0	16.74	0	0	0	0	42.18	5.27	6.9		ZPR1	MOUSEZinc finger protein ZPR1 OS=Mus musculus OX=10090 GN=Zpr1 PE=1 SV=1
TRINITY_DN2590_c0_g1_i41	0	0	2.1	0	0	0	0	0	0	2.89	0	5.93	2.18	2.11	0	0	0	0	2.14	3.4	0	0	0	0	1.59	1.85	0	0	0	10.59	4.46		ZPR1	MOUSEZinc finger protein ZPR1 OS=Mus musculus OX=10090 GN=Zpr1 PE=1 SV=1
TRINITY_DN2590_c0_g1_i114	0	47.2	14.52	0	0	0	0	0.09	17.76	0	0	23.7	49.81	28.66	0	48.4	0	0	11.07	0	24.48	66.82	12.14	0	44.8	22.85	0	11.68	0.34	0	0		ZPR1	MOUSEZinc finger protein ZPR1 OS=Mus musculus OX=10090 GN=Zpr1 PE=1 SV=1
TRINITY_DN2590_c0_g1_i85	1.4	2.24	6.95	2.42	0	0	0	0	3.28	0	5.84	0	0	38.04	0	0	2.92	0	0	8.88	8.11	11.78	8.82	0	0	0	0	0	0	4.98	4.4		ZPR1	MOUSEZinc finger protein ZPR1 OS=Mus musculus OX=10090 GN=Zpr1 PE=1 SV=1
TRINITY_DN2590_c0_g1_i21	107.61	11.66	31.8	95.12	40.05	64.67	110.51	38.9	31.2	67.7	35.91	15.25	76.8	86.88	0	20.01	118.08	0	75.35	59.31	40.14	37.48	48.27	133.13	16.52	32.39	25.46	72.35	0	6.36	28.17		ZPR1	MOUSEZinc finger protein ZPR1 OS=Mus musculus OX=10090 GN=Zpr1 PE=1 SV=1
TRINITY_DN2590_c0_g1_i101	0	0	4.73	2.31	0	5.77	2.05	0	0	3.97	2.07	0	10.53	0	0	10.55	0	0	14.85	0	0	0	0	13.8	11.38	4.76	13.59	6.34	0	0	0		ZPR1	MOUSEZinc finger protein ZPR1 OS=Mus musculus OX=10090 GN=Zpr1 PE=1 SV=1
TRINITY_DN2590_c0_g1_i55	0	18.17	10.48	0	0	0	0	20.57	8.99	0	0	6.66	33.38	51.8	0	12.16	0	0	21.56	0	12.46	50.63	8.5	31.34	19.82	8.31	45.46	16.51	50.62	0	18.46		ZPR1	MOUSEZinc finger protein ZPR1 OS=Mus musculus OX=10090 GN=Zpr1 PE=1 SV=1
TRINITY_DN2590_c0_g1_i82	0	2.64	0	0	2.09	0	0	3.91	0	0	4.83	0	3.92	0	0	4.58	0	0	12.97	0	0	0	0	9.56	8.74	0	19.27	24.95	19.73	5.48	8.38		ZPR1	MOUSEZinc finger protein ZPR1 OS=Mus musculus OX=10090 GN=Zpr1 PE=1 SV=1
TRINITY_DN2590_c0_g1_i51	77.88	28.77	49.52	119.65	0	77.9	0	0.18	58.28	9.06	0	53.43	116.08	47.45	12	78.78	0	39	40.68	51.28	75.8	51.51	65.89	0	36.85	98.66	0	51.36	0	0	0		ZPR1	MOUSEZinc finger protein ZPR1 OS=Mus musculus OX=10090 GN=Zpr1 PE=1 SV=1
TRINITY_DN2590_c0_g1_i17	0	4.26	0	0	0	0	1.48	0	2.39	0	0	1.5	0	0	0	0	0	0	1.84	0	0	0	0	3.71	0	0	1.38	1.42	0	0	0		ZPR1	BOVINZinc finger protein ZPR1 OS=Bos taurus OX=9913 GN=ZNF259 PE=2 SV=1
TRINITY_DN17248_c0_g1_i3	0	0	0	0	0	0	0	0	0	0	0	0	0	0	0	0	0	0	0	0	0	0	0	0	0	0	0	0	0	0	0		ZP3R	MOUSEZona pellucida sperm-binding protein 3 receptor OS=Mus musculus OX=10090 GN=Zp3r PE=1 SV=1
TRINITY_DN4265_c3_g1_i15	0	0	0	0	0	0	0	0	0	0	0	0	1	0	0	0	0	0	0	0	0	0	0	1.76	5.11	2.25	0	0	0	0	0		ZP3R	MOUSEZona pellucida sperm-binding protein 3 receptor OS=Mus musculus OX=10090 GN=Zp3r PE=1 SV=1
TRINITY_DN42653_c0_g1_i1	0	0	0	0	0	0	0	0	0	0	0	0	0	0	0	0	0	0	0	0	0	0	0	0	0	1	0	0	0	0	0		ZP3R	MOUSEZona pellucida sperm-binding protein 3 receptor OS=Mus musculus OX=10090 GN=Zp3r PE=1 SV=1
TRINITY_DN40893_c0_g1_i16	0	0	0	0	0	0	0	1	0	0	0	0	0	0	0	0	0	0	0	4	0	1	1	0	0	0	0	0	0	0	0		ZP3R	CAVPOZona pellucida sperm-binding protein 3 receptor OS=Cavia porcellus OX=10141 GN=ZP3R PE=1 SV=1
TRINITY_DN1378_c0_g1_i23	0	0	0	0	0	0	17.46	0	0	0	0	0	0.72	0	0	0	0	0	0.5	0	0	0	0	0	0	0	0	0	0	0	0		ZP3R	CAVPOZona pellucida sperm-binding protein 3 receptor OS=Cavia porcellus OX=10141 GN=ZP3R PE=1 SV=1
TRINITY_DN16447_c1_g1_i1	0	0	0	1	0	0	0	0	0	0	0	0	0	0	0	0	0	0	2.84	0	0	0	0	0	0	0	0	0	2.53	0	0		ZP3R	CAVPOZona pellucida sperm-binding protein 3 receptor OS=Cavia porcellus OX=10141 GN=ZP3R PE=1 SV=1
TRINITY_DN14644_c0_g1_i11	0	0	0	0	0	0	0	0	0	0	1	0	0	0	0	0	0	0	0	2	0	0	0	1	0	1	0	0	0	0	0		ZP3R	CAVPOZona pellucida sperm-binding protein 3 receptor OS=Cavia porcellus OX=10141 GN=ZP3R PE=1 SV=1
TRINITY_DN33489_c0_g1_i2	0	0	0	0	0	0	3	0	0	0	0	0	0	0	0	0	0	0	0	0	0	0	0	0	0	0	0	0	0	0	0		ZP3R	CAVPOZona pellucida sperm-binding protein 3 receptor OS=Cavia porcellus OX=10141 GN=ZP3R PE=1 SV=1
TRINITY_DN14644_c0_g1_i7	0	2	0	0	2	0	0	0	10	0	0	0	0	2	0	7	0	0	2	0	0	0	0	0	0	0	7	0	0	0	0		ZP3R	CAVPOZona pellucida sperm-binding protein 3 receptor OS=Cavia porcellus OX=10141 GN=ZP3R PE=1 SV=1
TRINITY_DN23661_c0_g3_i1	0	0	0	0	0	0	0	0	0	0	0	0	0	2	0	0	0	0	0	0	1	0	0	0	0	0	0	2	0	0	0		ZP3R	CAVPOZona pellucida sperm-binding protein 3 receptor OS=Cavia porcellus OX=10141 GN=ZP3R PE=1 SV=1
TRINITY_DN33489_c0_g1_i1	0	0	0	0	0	0	1	0	0	0	0	0	0	0	0	0	0	0	0	0	0	0	0	0	0	0	0	0	0	0	0		ZP3R	CAVPOZona pellucida sperm-binding protein 3 receptor OS=Cavia porcellus OX=10141 GN=ZP3R PE=1 SV=1
TRINITY_DN9024_c1_g1_i1	0	0	0	0	0	0	0	0	0	0	0	0	1	0	0	0	0	0	0	0	0	1	1	0	0	0	0	0	0	1	0		ZP3R	CAVPOZona pellucida sperm-binding protein 3 receptor OS=Cavia porcellus OX=10141 GN=ZP3R PE=1 SV=1
TRINITY_DN1378_c0_g1_i13	0	0	0	0	0	0	3.28	0	0	0	0	0	0.73	0	0	0	0	0	0.5	0	0	0	0	0	0	0	0	0	0	0	0		ZP3R	CAVPOZona pellucida sperm-binding protein 3 receptor OS=Cavia porcellus OX=10141 GN=ZP3R PE=1 SV=1
TRINITY_DN5862_c0_g1_i2	0	0	0	0	0	0	0	0	1.7	1	0	0	0	0	0	0	0	0	2	0	0	0	0	0	0	0	0	0	0	0	0		ZP3R	CAVPOZona pellucida sperm-binding protein 3 receptor OS=Cavia porcellus OX=10141 GN=ZP3R PE=1 SV=1
TRINITY_DN34645_c0_g1_i1	0	0	0	1	0	1	8	0	0	0	1	0	1	0	0	1	1	0	2	0	0	0	2	1.17	0	0	0	0	0	0	1		ZP3R	CAVPOZona pellucida sperm-binding protein 3 receptor OS=Cavia porcellus OX=10141 GN=ZP3R PE=1 SV=1
TRINITY_DN14644_c0_g1_i16	1.01	0	2	0	0	0	0	0	1	0	1	0	0	1	0	4.62	0	0	0	0	0	2	0	0	5	0	0	1	0	0	0		ZP3R	CAVPOZona pellucida sperm-binding protein 3 receptor OS=Cavia porcellus OX=10141 GN=ZP3R PE=1 SV=1
TRINITY_DN34645_c0_g1_i5	3.99	1	1	0	0	2	26.9	1	1.2	0	1.99	0	1.99	1.83	0	2	0	0	3	0	0	1	6.99	2.01	0	1	2.55	0	1	0	1		ZP3R	CAVPOZona pellucida sperm-binding protein 3 receptor OS=Cavia porcellus OX=10141 GN=ZP3R PE=1 SV=1
TRINITY_DN14644_c0_g1_i15	0	1	0	0	0	0	0	0	0	0	1	0	0	0	0	0	0	0	0	0	0	0	1	0	1	1	0	4.35	0	0	0		ZP3R	CAVPOZona pellucida sperm-binding protein 3 receptor OS=Cavia porcellus OX=10141 GN=ZP3R PE=1 SV=1
TRINITY_DN40893_c0_g1_i7	0	0	0	0	0	0	0	0	0	0	0	0	0	0	0	0	0	0	0	0	0	0	0	0	0	0	0	2	0	0	0		ZP3R	CAVPOZona pellucida sperm-binding protein 3 receptor OS=Cavia porcellus OX=10141 GN=ZP3R PE=1 SV=1
TRINITY_DN34645_c0_g1_i2	0	3.07	1	0	0	2	25.43	1	0	0	0	0	3.03	1.65	0	2.98	2.11	0	0	1	1	2	4.82	3	0	2.28	6	1.25	0	1	4		ZP3R	CAVPOZona pellucida sperm-binding protein 3 receptor OS=Cavia porcellus OX=10141 GN=ZP3R PE=1 SV=1
TRINITY_DN97680_c0_g1_i1	0	0	0	0	1	0	0	0	0	1	0	0	0	0	0	0	0	0	0	0	0	0	0	0	0	1	0	1	0	0	0		ZP3R	CAVPOZona pellucida sperm-binding protein 3 receptor OS=Cavia porcellus OX=10141 GN=ZP3R PE=1 SV=1
TRINITY_DN5862_c0_g1_i1	0	0	0	0	0	7	0	0	0	0	0	11	0	0	1	0	0	0	0	0	0	0	0	0	0	0	0	0	0	0	0		ZP3R	CAVPOZona pellucida sperm-binding protein 3 receptor OS=Cavia porcellus OX=10141 GN=ZP3R PE=1 SV=1
TRINITY_DN13581_c0_g1_i3	1.07	0	1	2.07	0	0	1.41	0	2.41	1	0	0	0	0	0	0	0	0	0	1	0	0	0	4.59	0	0	2.34	0	0	0	0		ZO3	MOUSETight junction protein ZO-3 OS=Mus musculus OX=10090 GN=Tjp3 PE=1 SV=1
TRINITY_DN13581_c0_g1_i7	14.2	61.09	92.37	17.44	0	65.23	4.51	0	0	0	0	0	0	0	0	0	0	18.97	0	0	0	0	0	0	0	0	11.53	0	0	0	28.01		ZO3	HUMANTight junction protein ZO-3 OS=Homo sapiens OX=9606 GN=TJP3 PE=1 SV=3
TRINITY_DN13581_c0_g1_i18	28.01	0	35.52	77.71	25.52	0	0	69.96	59.01	25.79	32.25	27.35	86.77	89.36	5.04	79.9	13.28	0	87.85	88.08	45.33	76.89	106.18	116.31	57.32	55.03	19.59	109.45	62.74	34.91	13.76		ZO3	HUMANTight junction protein ZO-3 OS=Homo sapiens OX=9606 GN=TJP3 PE=1 SV=3
TRINITY_DN13581_c0_g1_i19	19.5	0	10.74	0	0	0	15.45	0	0	0	0	0	0	0	0	0	0	0	0	0	4.73	0	19.92	36.27	19.56	21.77	61.17	0	13.8	0	0		ZO3	HUMANTight junction protein ZO-3 OS=Homo sapiens OX=9606 GN=TJP3 PE=1 SV=3
TRINITY_DN13581_c0_g1_i20	0	0	3.53	2.79	0	0.36	0	4.4	0	0	3.22	0	4.45	0	0	0	0	2.03	0	0	8.23	11.62	0	14.39	4.55	0	5.4	0	18.33	2.95	0		ZO3	HUMANTight junction protein ZO-3 OS=Homo sapiens OX=9606 GN=TJP3 PE=1 SV=3
TRINITY_DN13581_c0_g1_i24	10.2	0	0	11.44	37.65	16.24	61.51	21.6	16.61	33.01	37.96	11.74	10.5	15.83	4.8	18.85	37.73	0	15.68	11.68	0	0	65.15	0	43.66	18.45	34.51	31.42	55.91	36.9	29.69		ZO3	HUMANTight junction protein ZO-3 OS=Homo sapiens OX=9606 GN=TJP3 PE=1 SV=3
TRINITY_DN13581_c0_g1_i1	1.38	3.03	4.93	8.1	0	4.6	2.25	2.66	1.58	0	3.13	3	7.29	5.84	0	1.47	0	0	5.51	1.92	9.24	5.06	12.41	9.94	4.98	3.27	5.12	5.98	7.14	0	0		ZO3	HUMANTight junction protein ZO-3 OS=Homo sapiens OX=9606 GN=TJP3 PE=1 SV=3
TRINITY_DN2961_c0_g1_i21	0	0	3.15	0	1.25	1.33	0.35	1.27	3.65	0	0	0.61	2.99	0	0	0	2	0	0	2.84	2.53	5.07	2.2	4.88	4.17	6.22	5.29	4.26	2.41	8.5	4.34		ZO3	CANLFTight junction protein ZO-3 OS=Canis lupus familiaris OX=9615 GN=TJP3 PE=1 SV=1
TRINITY_DN57329_c0_g1_i1	0	0	0	0	0	0	0	0	0	0	0	0	0	0	7	0	0	0	0	0	0	0	0	0	0	0	0	0	0	0	0		ZO1	RATTight junction protein ZO-1 OS=Rattus norvegicus OX=10116 GN=Tjp1 PE=1 SV=1
TRINITY_DN11410_c0_g1_i4	0.99	0.99	3.46	0	0	0	0	0	2.66	0.99	2	1	2	0.99	0	0	1	1	1.99	1.29	3.99	0	0.99	2	0	1	0	0.17	2.49	0	0		ZO1	MOUSETight junction protein ZO-1 OS=Mus musculus OX=10090 GN=Tjp1 PE=1 SV=2
TRINITY_DN12605_c0_g1_i4	0	0	0	1	0	2	0	1	1	0	0	0	1	0	0	0	0	0	0	2	0	0	0	0	0	1	1	0	0	0	0		ZO1	MOUSETight junction protein ZO-1 OS=Mus musculus OX=10090 GN=Tjp1 PE=1 SV=2
TRINITY_DN32_c2_g1_i10	16.55	11.65	47.72	5.38	20.9	57.4	62.96	15.83	59.49	15.1	16.76	16.54	73.91	0	2.28	31.97	43.07	19.38	0	0	25.27	40.36	22.75	0	0	33.65	78.13	50.17	24.49	5.36	17.38		ZO1	MOUSETight junction protein ZO-1 OS=Mus musculus OX=10090 GN=Tjp1 PE=1 SV=2
TRINITY_DN11410_c0_g1_i2	0	0	0	0	0	0	0	0	0	0	0	0	0	0	0	0	0	0	0	0	0	0	0	0	0	0	0	1.82	1.09	0	0		ZO1	MOUSETight junction protein ZO-1 OS=Mus musculus OX=10090 GN=Tjp1 PE=1 SV=2
TRINITY_DN32_c2_g1_i5	13.39	16.35	24.99	97.67	39.7	52.18	66.79	53.09	27.41	31.43	29.93	34.34	110.24	40.74	0	89.86	21.51	3.68	53.96	79.03	29.13	82.95	28.04	96.75	40.4	48.27	53.37	56.15	46.58	6.38	5.76		ZO1	MOUSETight junction protein ZO-1 OS=Mus musculus OX=10090 GN=Tjp1 PE=1 SV=2
TRINITY_DN22_c0_g1_i28	0	0	0	0	0	0	0	0	0	0	0	1.97	0	0	0	0	0	0	36.26	0	0	0	0	52.94	0	0	0	33.99	0	0	0		ZO1	CANLFTight junction protein ZO-1 OS=Canis lupus familiaris OX=9615 GN=TJP1 PE=1 SV=1
TRINITY_DN2307_c0_g1_i42	0	1.49	0	0	0	0	0	0	2.62	0	0	0	4.36	1.96	0	0	0	0	0	0	0	0	0	0	0	1.73	0	5.85	1.83	48.46	138.19		ZNT9	MOUSEZinc transporter 9 OS=Mus musculus OX=10090 GN=Slc30a9 PE=1 SV=2
TRINITY_DN2307_c0_g1_i122	0	1.8	3.66	2.88	0	0	1.43	6.24	0	0	0	3.5	7.01	6.08	0	1.33	0	0	3.47	1.67	3.62	1.73	3.81	4.22	0	1.85	3.01	0	3.22	31.52	67.33		ZNT9	DANREZinc transporter 9 OS=Danio rerio OX=7955 GN=slc30a9 PE=2 SV=1
TRINITY_DN2307_c0_g1_i34	0	0	0	0	0	0	0	0	14.01	0	0	0	0	0	0	16.41	0	0	0	19.2	0	0	26.64	0	0	0	9.21	37.46	0	0	18.19		ZNT9	DANREZinc transporter 9 OS=Danio rerio OX=7955 GN=slc30a9 PE=2 SV=1
TRINITY_DN2307_c0_g1_i77	23.31	0	26.79	20.43	0	0	0	4.97	13.12	11.46	15.39	36.37	66.61	49.3	0	16.07	5.57	16.72	70.26	14.44	15.53	30.38	0	25.59	43.75	16.32	0.9	0	0	13.67	22.71		ZNT9	DANREZinc transporter 9 OS=Danio rerio OX=7955 GN=slc30a9 PE=2 SV=1
TRINITY_DN2307_c0_g1_i73	0	0	0	0	3.23	0	2.21	0	0	0	0	8.87	7.96	0	0	0	6.69	0	0	0	3.99	5.95	10.3	4.82	0	0	0	0	0	18.5	71.57		ZNT9	DANREZinc transporter 9 OS=Danio rerio OX=7955 GN=slc30a9 PE=2 SV=1
TRINITY_DN2307_c0_g1_i104	0	15.81	6	2.46	0	0	23.99	15.69	14.7	14.73	0	3.28	0	29.67	0	22.41	13.35	0	0	0	0	31.99	0	13.64	28.11	24.6	0	22.1	0	9.04	0		ZNT9	DANREZinc transporter 9 OS=Danio rerio OX=7955 GN=slc30a9 PE=2 SV=1
TRINITY_DN2307_c0_g1_i55	0	0	0	0	0	0	0	7.32	0	0	0	0	3.42	0	0	0	0	0	0	0	0	0	0	0	0	0	0	0	0	0	4.63		ZNT9	DANREZinc transporter 9 OS=Danio rerio OX=7955 GN=slc30a9 PE=2 SV=1
TRINITY_DN2307_c0_g1_i95	0	0	0	0	0	0	0	0	0	0	1.44	0	4.03	13.17	0	4.61	1.52	1.28	4.62	8.5	1.96	0	0	0	0	1.57	0	3.12	2.49	47.61	51.38		ZNT9	DANREZinc transporter 9 OS=Danio rerio OX=7955 GN=slc30a9 PE=2 SV=1
TRINITY_DN2307_c0_g1_i27	0	10.64	0	33.78	23.64	20.7	17.88	0	19.73	0	6.72	0	0	1.71	0	0	0	0	0	3.53	22.89	3.75	0	29.96	0	0	46.61	5.28	17.78	9.7	18.89		ZNT9	DANREZinc transporter 9 OS=Danio rerio OX=7955 GN=slc30a9 PE=2 SV=1
TRINITY_DN2307_c0_g1_i83	0	0	3.68	0	0	0	0	14.34	0	0	0	5.09	24.3	0	0	0	0	0	0	0	7.1	0	33.55	47.23	0	0	13.71	0	0	63.24	86.59		ZNT9	DANREZinc transporter 9 OS=Danio rerio OX=7955 GN=slc30a9 PE=2 SV=1
TRINITY_DN2307_c0_g1_i78	22.15	14.44	30.55	0	15.87	21.12	9.36	0	0	12.81	11.81	0	48.02	9.01	5	11.48	17.86	0	0	1.89	0	43.35	35.63	0.36	0	29.47	0	21.18	18.68	0	0		ZNT9	DANREZinc transporter 9 OS=Danio rerio OX=7955 GN=slc30a9 PE=2 SV=1
TRINITY_DN2307_c0_g1_i1	2	0	0	0	0	1.81	0	3.17	2.36	0	3.39	0	0	8.78	0	0	0	0	4.15	0	0	0	7.39	0	3.14	0	5.17	8.45	0.32	10.73	15.52		ZNT9	DANREZinc transporter 9 OS=Danio rerio OX=7955 GN=slc30a9 PE=2 SV=1
TRINITY_DN2307_c0_g1_i117	0	0	0	0	8.83	3.45	23.11	3.7	7.18	0	0	1.18	0	51.8	0	67.39	0	0	23.78	42.39	7.64	20.78	11.39	2.97	0	5.75	7.29	10.39	7.67	0	0		ZNT9	DANREZinc transporter 9 OS=Danio rerio OX=7955 GN=slc30a9 PE=2 SV=1
TRINITY_DN2307_c0_g1_i113	3.55	3.09	7.01	3.45	3.42	5.03	3.01	4.15	2.56	0	0	3.32	0	14.5	0	0	0	0	2.71	0	0	6.21	4.29	5.12	1.29	0	2.09	6.82	0	0	0		ZNT9	DANREZinc transporter 9 OS=Danio rerio OX=7955 GN=slc30a9 PE=2 SV=1
TRINITY_DN2307_c0_g1_i99	0	5.72	0	0	0	1.33	0	0	3.4	0	0	5.19	7.3	11.01	0	1.65	0	0	0	3.15	6.27	5.86	0	4.09	5.43	2.69	0	7.35	0	5.52	0		ZNT9	DANREZinc transporter 9 OS=Danio rerio OX=7955 GN=slc30a9 PE=2 SV=1
TRINITY_DN24243_c0_g1_i43	7.4	0	8.77	5.49	3.41	9.08	2.01	1.75	5.49	8.26	5.24	0	6.05	0	0	0	0	0	2.56	0	0	0	2.16	3.15	1.99	0	2.8	0	9.25	0	5.08		ZNT8	HUMANZinc transporter 8 OS=Homo sapiens OX=9606 GN=SLC30A8 PE=1 SV=2
TRINITY_DN64608_c0_g1_i1	0	0	0	0	0	0	0	0	0	0	0	0	0	0	2	0	0	0	0	0	0	0	0	0	0	0	0	0	0	0	0		ZNT7	DANREZinc transporter 7 OS=Danio rerio OX=7955 GN=slc30a7 PE=2 SV=1
TRINITY_DN514_c0_g1_i40	0	87.45	144.04	125.81	108.26	117.57	93.33	106.16	107.89	62.56	86.48	36.82	298.05	260.93	7	192.67	59.22	24.59	178.02	141.58	86.56	147.88	172.36	124.59	133.44	64.07	150.02	116.69	139	47.76	63.85		ZNT7	CHICKZinc transporter 7 OS=Gallus gallus OX=9031 GN=SLC30A7 PE=2 SV=1
TRINITY_DN138478_c0_g1_i1	0	0	0	0	0	0	0	0	0	0	0	0	0	0	11	0	0	0	0	0	0	0	0	0	0	0	0	0	0	0	0		ZNT7	CHICKZinc transporter 7 OS=Gallus gallus OX=9031 GN=SLC30A7 PE=2 SV=1
TRINITY_DN514_c0_g1_i23	83.28	8.94	0	0	15.02	0	28.8	0	15.58	3.45	0	22.62	0	0	0	0	0	0	0	0	0	28.51	0	36.9	0	27.29	53.43	15.1	0	0	0		ZNT7	CHICKZinc transporter 7 OS=Gallus gallus OX=9031 GN=SLC30A7 PE=2 SV=1
TRINITY_DN99068_c0_g1_i1	0	0	0	0	0	0	0	0	0	0	1	0	0	0	0	0	0	0	0	0	0	0	0	0	0	1	1	0	0	0	0		ZNT7	CHICKZinc transporter 7 OS=Gallus gallus OX=9031 GN=SLC30A7 PE=2 SV=1
TRINITY_DN9458_c0_g1_i5	0	0	0	0	0	0	0	0	0	0	1	0	2.26	0	0	0	0	0	0	0	0	0	1.38	0	2	0	0	0	0	0	0		ZNT6	DANREZinc transporter 6 OS=Danio rerio OX=7955 GN=slc30a6 PE=2 SV=1
TRINITY_DN9458_c0_g1_i23	0	4	0.04	1.54	0.02	2.44	0	0.01	2.49	0	0	0	0.99	0.01	0	4.55	0.01	0	0	8.23	4	0.03	4.62	0.09	0	0.31	0.01	0	1.33	0	0		ZNT6	DANREZinc transporter 6 OS=Danio rerio OX=7955 GN=slc30a6 PE=2 SV=1
TRINITY_DN9458_c0_g1_i2	0	0	5.2	3.08	4.59	0	0	2.26	0	0	3	0	6.61	1.54	0	0	0.99	0	6.31	0	0	4.84	0	5.77	1	3.9	1.99	5.61	0	0	0		ZNT6	DANREZinc transporter 6 OS=Danio rerio OX=7955 GN=slc30a6 PE=2 SV=1
TRINITY_DN9458_c0_g1_i3	0	1	0	0	0	0	0	0	0	0	0	0	0	0.45	0	0	0	0	0	0	0	0	0	0	0	0.33	0	0	0	0	0		ZNT6	DANREZinc transporter 6 OS=Danio rerio OX=7955 GN=slc30a6 PE=2 SV=1
TRINITY_DN9458_c0_g1_i8	0	0	0	4.23	4.39	0	7.96	9.09	9.5	0	1.96	3.9	8.07	0	0	0	0	0	5.04	5.81	0	1.14	0	0	3.94	2.83	0	0	0	0	1		ZNT6	CHICKZinc transporter 6 OS=Gallus gallus OX=9031 GN=SLC30A6 PE=1 SV=1
TRINITY_DN9458_c0_g1_i29	5.18	5.29	10.08	0	0	13.69	0	0	0	5.69	0	0	0	4.49	0	18.45	2.27	0	0	0	0	0	0	12.25	0	2.63	7.57	5.59	4.18	0	0		ZNT6	CHICKZinc transporter 6 OS=Gallus gallus OX=9031 GN=SLC30A6 PE=1 SV=1
TRINITY_DN117607_c0_g1_i1	0	0	0	0	0	0	0	0	0	0	0	0	0	0	2	0	0	0	0	0	0	0	0	0	0	0	0	0	0	0	0		ZNT6	BOVINZinc transporter 6 OS=Bos taurus OX=9913 GN=SLC30A6 PE=2 SV=1
TRINITY_DN9458_c0_g1_i11	1.72	0	0	0	0	0	0	0	4.55	0	0	0	7.56	0.6	0	0	1.03	0	0	2.49	3.99	4.82	0	4.78	2.06	0	0	0	0	1.13	0		ZNT6	BOVINZinc transporter 6 OS=Bos taurus OX=9913 GN=SLC30A6 PE=2 SV=1
TRINITY_DN117696_c0_g1_i1	0	0	0	0	0	0	0	0	0	0	0	0	0	0	3	0	0	0	0	0	0	0	0	0	0	0	0	0	0	0	0		ZNT5	XENTRZinc transporter 5 OS=Xenopus tropicalis OX=8364 GN=slc30a5 PE=2 SV=1
TRINITY_DN514_c0_g1_i17	21	32	47	36	29	38	15	24	38	17	25	18	84	54	2	40	20	9	18	41	25	35	18	38	43	27	39	30	29	22	16		ZNT5	XENTRZinc transporter 5 OS=Xenopus tropicalis OX=8364 GN=slc30a5 PE=2 SV=1
TRINITY_DN108078_c0_g1_i1	0	0	0	0	0	0	0	0	0	0	0	0	0	0	3	0	0	0	0	0	0	0	0	0	0	0	0	0	0	0	0		ZNT5	CHICKZinc transporter 5 OS=Gallus gallus OX=9031 GN=SLC30A5 PE=2 SV=1
TRINITY_DN49620_c0_g1_i1	0	0	0	0	0	0	0	0	0	0	0	0	0	0	67	0	0	0	0	0	0	0	0	0	0	0	0	0	0	0	0		ZNT2	RATZinc transporter 2 OS=Rattus norvegicus OX=10116 GN=Slc30a2 PE=2 SV=1
TRINITY_DN24243_c0_g1_i35	0.42	8.65	0	0	5.39	0	0	0	21.05	1.51	3.29	7.22	8.01	3.97	1.84	0	0	0	4.55	8.65	2.38	2.04	2.11	1.74	0.71	0	4.22	2.7	0	4.3	0.4		ZNT2	MOUSEZinc transporter 2 OS=Mus musculus OX=10090 GN=Slc30a2 PE=1 SV=1
TRINITY_DN24243_c0_g1_i26	56.96	10.95	83.72	89.62	91.96	60.82	77.25	73.65	118.83	71.3	18.74	15.55	149.66	56.09	4.16	92.17	24.03	12.55	99.1	62.64	34.96	64.22	57.79	78.83	60.54	49.11	37.55	29.1	71.42	12.52	19.84		ZNT2	MOUSEZinc transporter 2 OS=Mus musculus OX=10090 GN=Slc30a2 PE=1 SV=1
TRINITY_DN24243_c0_g1_i39	0	11.06	34.09	12.65	5.54	17.54	0	0	0	0	9.89	20.32	8.62	7.39	0	0	7.62	0	21.37	0	0	0	0	0	10.28	0	7.37	10.15	0	0	0		ZNT2	MOUSEZinc transporter 2 OS=Mus musculus OX=10090 GN=Slc30a2 PE=1 SV=1
TRINITY_DN24243_c0_g1_i2	8.99	0	0	0	6.02	0	0	0	7.22	0	4.6	0	0	5.78	0	0	0	0	0	11.63	0	0	0	4.68	0	0	0	0	0	0	3.54		ZNT2	MOUSEZinc transporter 2 OS=Mus musculus OX=10090 GN=Slc30a2 PE=1 SV=1
TRINITY_DN24243_c0_g1_i8	0	0	8.58	0	0	0	0.62	5.6	0	7.74	0	2.91	0.23	15.51	0	2.76	2.47	3.45	2.92	0	0	2.73	0	4.66	0	7.89	3.12	8.58	0	3.18	4.08		ZNT2	MOUSEZinc transporter 2 OS=Mus musculus OX=10090 GN=Slc30a2 PE=1 SV=1
TRINITY_DN24243_c0_g1_i40	0	0	0	0	0	0	11.31	0	26.27	0	0	0	0	0	0	0	0	0	0	0	0	0	11.3	0	0	0	0	0	0	0	0		ZNT2	MOUSEZinc transporter 2 OS=Mus musculus OX=10090 GN=Slc30a2 PE=1 SV=1
TRINITY_DN49620_c1_g1_i1	0	0	0	0	0	0	0	0	0	0	0	0	0	0	35	0	0	0	0	0	0	0	0	0	0	0	0	0	0	0	0		ZNT2	MOUSEZinc transporter 2 OS=Mus musculus OX=10090 GN=Slc30a2 PE=1 SV=1
TRINITY_DN9531_c1_g1_i1	0	0	0	0	0	0	0	0	0	0	0	1	0	0	0	0	0	0	0	0	0	0	0	0	0	0	0	0	0	0	0		ZNT2	MOUSEZinc transporter 2 OS=Mus musculus OX=10090 GN=Slc30a2 PE=1 SV=1
TRINITY_DN24243_c0_g1_i10	6.74	44.63	0	0	0	0	0	0	0	0	11.8	0	0	0	0	0	0	0	6.08	0	0	0	0	0	0	0	7.71	0	0	0	0		ZNT2	MOUSEZinc transporter 2 OS=Mus musculus OX=10090 GN=Slc30a2 PE=1 SV=1
TRINITY_DN20532_c0_g1_i3	0	0	2.75	0	0	0	3.01	0.61	2.94	3.93	3.31	3.27	0	0	0	0	0	2.42	0	0	0	3.69	4.43	4.29	3.18	0	0	2.65	2.79	5.75	3.44		ZNRF2	MOUSEE3 ubiquitin-protein ligase ZNRF2 OS=Mus musculus OX=10090 GN=Znrf2 PE=1 SV=1
TRINITY_DN20532_c0_g1_i1	51.9	23.73	47.43	65.98	31	80.13	40.38	19.2	43.62	8.98	16.19	19.16	61.83	43.99	0	40.53	34.78	9.58	51.96	53.43	15.17	34.62	30.64	35.43	47.82	62.67	38.85	37.49	29.96	25.07	31.53		ZNRF2	MOUSEE3 ubiquitin-protein ligase ZNRF2 OS=Mus musculus OX=10090 GN=Znrf2 PE=1 SV=1
TRINITY_DN20532_c0_g1_i8	0	0	1.07	0	0	1.07	2.69	2.49	0	0	0	0	0	1.14	0	0	0	0	0	0	1.26	1.7	0	0	0	0	0	0	0	0	0		ZNRF2	HUMANE3 ubiquitin-protein ligase ZNRF2 OS=Homo sapiens OX=9606 GN=ZNRF2 PE=1 SV=1
TRINITY_DN20532_c0_g1_i9	0	0	0	0	0	1.39	0	0	1.43	0	3.45	0	0	1.32	0	0	1.55	0	0	1.17	0	0	0	0	0	0	2.88	0	0	0	0		ZNRF1	XENLAE3 ubiquitin-protein ligase ZNRF1 OS=Xenopus laevis OX=8355 GN=znrf1 PE=2 SV=1
TRINITY_DN99041_c0_g1_i1	0	0	0	0	0	0	0	0	0	0	0	0	0	0	6	0	0	0	0	0	0	0	0	0	0	0	0	0	0	0	0		ZNRD2	HUMANProtein ZNRD2 OS=Homo sapiens OX=9606 GN=ZNRD2 PE=1 SV=1
TRINITY_DN239_c0_g1_i24	64.12	78.5	80.66	51.48	94.38	67.14	86.88	28.22	39.75	39.41	66.77	43.89	76.53	82.4	4.52	57.36	26.13	5.49	51.42	54.45	22.82	51.59	34.98	73.2	63.82	108.17	102.08	89.57	105.36	24.56	71.57		ZNHI2	MOUSEZinc finger HIT domain-containing protein 2 OS=Mus musculus OX=10090 GN=Znhit2 PE=2 SV=2
TRINITY_DN239_c0_g1_i23	31.36	12.11	106.91	34.79	25.03	0.17	111.69	45.89	0	113.1	131.82	0	201.98	182.08	0	2.4	0	0	111.37	0	0	0	0	0	133.48	0	0	0	30.51	7.35	126.38		ZNHI2	MOUSEZinc finger HIT domain-containing protein 2 OS=Mus musculus OX=10090 GN=Znhit2 PE=2 SV=2
TRINITY_DN239_c0_g1_i19	25.28	33.78	19.28	17.97	28.66	15.01	0	0	63.35	29	23.06	42.52	13.55	53.63	0	55.64	0	0.27	16.04	76.78	14.26	68.57	26.13	26.3	5.06	69.3	23.08	87.14	65.85	64.5	117.13		ZNHI2	MOUSEZinc finger HIT domain-containing protein 2 OS=Mus musculus OX=10090 GN=Znhit2 PE=2 SV=2
TRINITY_DN239_c0_g1_i15	163.37	286.89	284.75	155.87	327.14	273.57	387.61	188.54	336.67	166.56	230.37	164.49	157.04	236.81	13.84	206.08	83.03	31.8	58.5	190.92	129	212.68	122.68	357.39	194.29	430.33	318.86	431.46	430.77	67.58	202.2		ZNHI2	MOUSEZinc finger HIT domain-containing protein 2 OS=Mus musculus OX=10090 GN=Znhit2 PE=2 SV=2
TRINITY_DN239_c0_g1_i8	5.8	21.33	0	0	9.31	3.67	49.64	23.97	7.57	28.1	0	19.88	5.5	16.74	0	0	0	0	0	19.13	0	6.79	3.63	0	0	26.56	0	34.04	0	0	25.45		ZNHI2	MOUSEZinc finger HIT domain-containing protein 2 OS=Mus musculus OX=10090 GN=Znhit2 PE=2 SV=2
TRINITY_DN239_c0_g1_i6	0	0	0	0	0	0	0	0	0	0	0	0	0	0	0	0	0	0	0	0	0	0	0	0	0	0.34	0	0	0	0	0		ZNHI2	MOUSEZinc finger HIT domain-containing protein 2 OS=Mus musculus OX=10090 GN=Znhit2 PE=2 SV=2
TRINITY_DN239_c0_g1_i4	1.77	10.15	1.47	6.08	1.48	0	8.16	10.66	9.8	12.1	5.78	3.3	1.67	7.14	0	0	0	0	0	2.05	2.29	1.75	0	11.13	1.55	3.74	3.04	5.63	12.41	5.49	25.13		ZNHI2	MOUSEZinc finger HIT domain-containing protein 2 OS=Mus musculus OX=10090 GN=Znhit2 PE=2 SV=2
TRINITY_DN239_c0_g1_i21	11.63	0	5.2	0	0	13.2	7.02	30.04	25.29	0	28.76	0	0	0	1.9	15.64	17.25	5	9.48	0	5.59	0	0	91.09	17.17	0	25.78	12.36	21.93	11.49	10.95		ZNHI2	MOUSEZinc finger HIT domain-containing protein 2 OS=Mus musculus OX=10090 GN=Znhit2 PE=2 SV=2
TRINITY_DN1266_c0_g1_i25	0	9.12	7.44	14.14	13.41	7.08	24.83	51.03	45.67	10.81	6.21	23.61	49.66	15.49	0	25.11	7.89	0	9.62	20.52	17.12	20.94	8.07	43.47	50.9	64.98	77.17	42.31	5.77	0	0		ZNFX1	MOUSENFX1-type zinc finger-containing protein 1 OS=Mus musculus OX=10090 GN=Znfx1 PE=1 SV=3
TRINITY_DN22419_c0_g2_i1	1	2	0	0	0	1	0	2	1	0	0.84	0	2	0	0	1	0	0	1	0	0	0	1	1.99	3.83	1	6.92	1.86	2	1	0		ZNFX1	MOUSENFX1-type zinc finger-containing protein 1 OS=Mus musculus OX=10090 GN=Znfx1 PE=1 SV=3
TRINITY_DN15714_c0_g1_i1	0	0	0	0	0	0	0	0	0	0	0	0	0	0	28.89	0	0	0	0	0	0	0	0	0	0	0	0	0	0	0	0		ZNFX1	MOUSENFX1-type zinc finger-containing protein 1 OS=Mus musculus OX=10090 GN=Znfx1 PE=1 SV=3
TRINITY_DN23900_c0_g1_i4	3.59	1	0	0	1	0	0.99	0	1.96	0	3	0	0	0	0	0.97	1	0	0	0	0	0.03	0	6.59	5.99	0	7	1.48	0	1	0		ZNFX1	MOUSENFX1-type zinc finger-containing protein 1 OS=Mus musculus OX=10090 GN=Znfx1 PE=1 SV=3
TRINITY_DN36666_c0_g1_i5	0	1	2.03	2	0	0	2.31	1	1	0.54	3	0	2	1.65	0	0	0	0	3.86	1	3	1	1	8	1.5	4	3.36	0	3	0	0		ZNFX1	MOUSENFX1-type zinc finger-containing protein 1 OS=Mus musculus OX=10090 GN=Znfx1 PE=1 SV=3
TRINITY_DN1266_c0_g1_i7	0	0	0	0	0	0	0	0	81.23	0	151.13	0	0	0	0	122.63	0	0	0	0	0	4.77	0	25.28	0	16.02	0	0	0	0	0		ZNFX1	MOUSENFX1-type zinc finger-containing protein 1 OS=Mus musculus OX=10090 GN=Znfx1 PE=1 SV=3
TRINITY_DN23900_c0_g1_i13	0	0	2.5	0	0	0	0	1.25	0	0.5	0	0	0	1	0	0	0.5	0	0.35	0	1.33	0.03	0	10.96	2.47	1.01	0	0	0	0	0.5		ZNFX1	MOUSENFX1-type zinc finger-containing protein 1 OS=Mus musculus OX=10090 GN=Znfx1 PE=1 SV=3
TRINITY_DN27326_c0_g1_i1	2	1	2	1	4	1	6	6	3	2	2	0	8	3	0	1	2	1	3	2	1	3	2	3	0	3	2	1	1	0	0		ZNFX1	MOUSENFX1-type zinc finger-containing protein 1 OS=Mus musculus OX=10090 GN=Znfx1 PE=1 SV=3
TRINITY_DN11286_c0_g1_i5	0	0	7	0	0	0	0	0	0	0	0	0	2	1.2	0	0	0	0	0	0	0	0	1	3	0	1	0	2	1	0	0		ZNFX1	MOUSENFX1-type zinc finger-containing protein 1 OS=Mus musculus OX=10090 GN=Znfx1 PE=1 SV=3
TRINITY_DN1266_c0_g1_i26	1.2	0	0	3.06	0	0	19.89	121.12	40.42	217.4	0	0	0	0	8.5	0	11.32	21.47	221.96	0	0	97.5	34.36	0	0	0	8.96	0	46.6	0	4.65		ZNFX1	MOUSENFX1-type zinc finger-containing protein 1 OS=Mus musculus OX=10090 GN=Znfx1 PE=1 SV=3
TRINITY_DN5170_c0_g1_i1	0	5.36	0	16.68	0	0.48	0	0	0	0	0	0	0	8.94	2	0.67	0	1.21	20.45	2.77	5.51	0	0	30.23	5.19	4.49	0	7.12	4.01	0	7.93		ZNFX1	MOUSENFX1-type zinc finger-containing protein 1 OS=Mus musculus OX=10090 GN=Znfx1 PE=1 SV=3
TRINITY_DN101248_c0_g1_i1	0	0	0	0	0	0	0	0	0	1	1	0	0	0	0	0	0	0	0	0	0	0	0	0	0	0	0	0	0	0	0		ZNFX1	MOUSENFX1-type zinc finger-containing protein 1 OS=Mus musculus OX=10090 GN=Znfx1 PE=1 SV=3
TRINITY_DN41304_c0_g1_i2	7.72	0	11.56	7	6	8	0	3.73	0	3	4	1.04	6.93	9.93	0	2.9	0	0	5.94	2	1	1	0.89	1	1	2	1	1	3	0	0		ZNFX1	MOUSENFX1-type zinc finger-containing protein 1 OS=Mus musculus OX=10090 GN=Znfx1 PE=1 SV=3
TRINITY_DN50943_c1_g1_i1	0	0	0	0	0	0	0	0	0	0	0	0	0	0	4	0	0	0	0	0	0	0	0	0	0	0	0	0	0	0	0		ZNFX1	MOUSENFX1-type zinc finger-containing protein 1 OS=Mus musculus OX=10090 GN=Znfx1 PE=1 SV=3
TRINITY_DN36666_c0_g1_i1	0	1	9	0	0	1	0	1	0	0	0	0	4	0	0	0	1	0	1	4	0	0	4	8	3.61	0	0	1.34	3.48	0	1		ZNFX1	MOUSENFX1-type zinc finger-containing protein 1 OS=Mus musculus OX=10090 GN=Znfx1 PE=1 SV=3
TRINITY_DN36666_c0_g1_i6	0	1	0	1	0	0	0	1	0	0	0	0	0	0	0	0	1	0	0	1	0	0	0	1	1	1	1	0	1	0	0		ZNFX1	MOUSENFX1-type zinc finger-containing protein 1 OS=Mus musculus OX=10090 GN=Znfx1 PE=1 SV=3
TRINITY_DN50943_c0_g1_i1	0	0	0	0	0	0	0	0	0	0	0	0	0	0	9.87	0	0	0	0	0	0	0	0	0	0	0	0	0	0	0	0		ZNFX1	MOUSENFX1-type zinc finger-containing protein 1 OS=Mus musculus OX=10090 GN=Znfx1 PE=1 SV=3
TRINITY_DN1266_c0_g1_i6	0	0	0	0.04	0	0	117.79	67.97	0	0	76.31	38.97	201.49	83.69	0.5	0	0	0.13	0	88.69	81.25	0	0	30.04	56.85	53.27	0.12	10.02	64.32	0	0.04		ZNFX1	MOUSENFX1-type zinc finger-containing protein 1 OS=Mus musculus OX=10090 GN=Znfx1 PE=1 SV=3
TRINITY_DN107899_c0_g1_i1	0	0	0	0	0	0	0	0	0	0	0	0	0	0	6	0	0	0	0	0	0	0	0	0	0	0	0	0	0	0	0		ZNFX1	MOUSENFX1-type zinc finger-containing protein 1 OS=Mus musculus OX=10090 GN=Znfx1 PE=1 SV=3
TRINITY_DN23900_c0_g1_i14	0	0	0	0	0	0	2	0	0	0	0	0	0	1.56	0	0	0	0	0	0	0	0	0	0	0	0	0	0	3	0	0		ZNFX1	MOUSENFX1-type zinc finger-containing protein 1 OS=Mus musculus OX=10090 GN=Znfx1 PE=1 SV=3
TRINITY_DN1266_c0_g1_i16	22.61	16.09	0	23.4	22.32	16.81	13.76	38.58	45.54	37.09	33.99	19.32	73.47	15.83	0	11.55	18.41	4.17	29.92	32.12	6.97	4.71	43.31	80.95	115.34	90.64	105.48	3.66	29.69	0	0		ZNFX1	MOUSENFX1-type zinc finger-containing protein 1 OS=Mus musculus OX=10090 GN=Znfx1 PE=1 SV=3
TRINITY_DN1266_c0_g1_i11	0	0	20.13	0	1.3	0	2.36	0.64	1.92	3.28	0	0.99	0	0	3	0.01	0	2.86	0	17.25	9.23	10.72	22.54	18.7	4.8	0	0	1.45	16.38	3	0		ZNFX1	MOUSENFX1-type zinc finger-containing protein 1 OS=Mus musculus OX=10090 GN=Znfx1 PE=1 SV=3
TRINITY_DN11286_c0_g1_i2	0	0	0	3	1	1	2	1	1	0	0	0	1.05	1.8	0	0	0	0	0	1	2	0	4.02	2	0	2	4	3	1	0	0		ZNFX1	MOUSENFX1-type zinc finger-containing protein 1 OS=Mus musculus OX=10090 GN=Znfx1 PE=1 SV=3
TRINITY_DN30299_c0_g1_i3	7	0	0	0	3	0	9	0	7	0	1	2	0	6	2	9	3	0	1	17	4	3	1	16	0	0	10	12	6	0	1		ZNFX1	MOUSENFX1-type zinc finger-containing protein 1 OS=Mus musculus OX=10090 GN=Znfx1 PE=1 SV=3
TRINITY_DN59809_c0_g1_i1	0	0	0	0	0	0	0	0	0	0	0	0	0	0	5	0	0	0	0	0	0	0	0	0	0	0	0	0	0	0	0		ZNFX1	MOUSENFX1-type zinc finger-containing protein 1 OS=Mus musculus OX=10090 GN=Znfx1 PE=1 SV=3
TRINITY_DN15714_c0_g1_i2	0	0	0	0	0	0	0	0	0	0	0	0	0	0	21.11	0	0	0	0	0	0	0	0	0	0	0	0	0	0	0	0		ZNFX1	MOUSENFX1-type zinc finger-containing protein 1 OS=Mus musculus OX=10090 GN=Znfx1 PE=1 SV=3
TRINITY_DN23900_c0_g1_i11	1.16	0	2.5	1	2.47	3	3.59	0	0	0.5	0	1	4.69	1	0	1.28	0.5	0	2.78	1.24	0	0.03	0	0	2.47	1.01	1.16	2.27	3	0	0.5		ZNFX1	MOUSENFX1-type zinc finger-containing protein 1 OS=Mus musculus OX=10090 GN=Znfx1 PE=1 SV=3
TRINITY_DN36666_c0_g1_i8	0	0	0	0	0	0	3.69	0	0	1.72	0	0	0	1.36	0	0	0	0	0.14	0	0	0	0	0	1.87	0	1.64	3.66	2.22	0	0		ZNFX1	MOUSENFX1-type zinc finger-containing protein 1 OS=Mus musculus OX=10090 GN=Znfx1 PE=1 SV=3
TRINITY_DN1266_c0_g1_i15	0	0	22.79	0	0	0	41.49	0	26.08	0	0	12.89	0	15.83	0	23.21	0	4.17	0	32.12	6.97	52.52	0	18.89	0	0	79.1	63.44	89.08	0	5.72		ZNFX1	MOUSENFX1-type zinc finger-containing protein 1 OS=Mus musculus OX=10090 GN=Znfx1 PE=1 SV=3
TRINITY_DN41304_c0_g1_i1	0	0	0	0	0	0	5	0	0	0	0	0	3.07	0	0	0	0	0	0	0	0	0	0	0	0	0	0	0	0	0	0		ZNFX1	MOUSENFX1-type zinc finger-containing protein 1 OS=Mus musculus OX=10090 GN=Znfx1 PE=1 SV=3
TRINITY_DN40821_c0_g1_i2	0	0	1	0	0	0	0	1	0	0	0	0	0	1	0	0	0	0	0	1	0	0	0	0	0	0	0	0	2	0	0		ZNFX1	MOUSENFX1-type zinc finger-containing protein 1 OS=Mus musculus OX=10090 GN=Znfx1 PE=1 SV=3
TRINITY_DN36666_c0_g1_i2	2	0	0	0	1	0	0	0	4	3.74	0	0	0	1	0	0	0	0	0	0	0	1	0	0	1.02	0	0	0	2.3	0	0		ZNFX1	MOUSENFX1-type zinc finger-containing protein 1 OS=Mus musculus OX=10090 GN=Znfx1 PE=1 SV=3
TRINITY_DN22419_c0_g1_i1	1	2	1	0	0	0	0	3	0	2	0	0	0	2	0	0	0	0	2	0	0	0	1	1	1	0	0	0	1	0	0		ZNFX1	MOUSENFX1-type zinc finger-containing protein 1 OS=Mus musculus OX=10090 GN=Znfx1 PE=1 SV=3
TRINITY_DN50943_c0_g1_i2	0	0	0	0	0	0	0	0	0	0	0	0	0	0	7.13	0	0	0	0	0	0	0	0	0	0	0	0	0	0	0	0		ZNFX1	MOUSENFX1-type zinc finger-containing protein 1 OS=Mus musculus OX=10090 GN=Znfx1 PE=1 SV=3
TRINITY_DN17186_c0_g1_i3	0	0	0	0	0	0	2	0	1.45	3	5	0	0	0	0	1	1	0	0	0	0	0	0	0	0	3	3	0	0	0	0		ZNFX1	MOUSENFX1-type zinc finger-containing protein 1 OS=Mus musculus OX=10090 GN=Znfx1 PE=1 SV=3
TRINITY_DN109942_c0_g1_i1	0	0	0	0	0	0	0	0	0	0	0	0	0	0	0	0	2	0	0	0	0	0	0	0	0	0	0	0	0	0	0		ZNFX1	MOUSENFX1-type zinc finger-containing protein 1 OS=Mus musculus OX=10090 GN=Znfx1 PE=1 SV=3
TRINITY_DN1266_c0_g1_i2	0	7.59	23.7	7.09	1.61	6.39	0	6.66	0	10.05	9.13	3.69	27.41	14.39	0	7.75	2.78	3.26	6.99	0.75	1.05	0	22.24	23.54	11.54	6.63	10.41	13.03	38.23	0	5.05		ZNFX1	MOUSENFX1-type zinc finger-containing protein 1 OS=Mus musculus OX=10090 GN=Znfx1 PE=1 SV=3
TRINITY_DN9582_c1_g1_i2	1	0	11.59	1	1	2	0	1	0	1	0	0	6	2.86	0	2	0	1	0	1	0	2	2.04	11	3	0	0	1	7	1	3		ZNFX1	MOUSENFX1-type zinc finger-containing protein 1 OS=Mus musculus OX=10090 GN=Znfx1 PE=1 SV=3
TRINITY_DN1266_c0_g1_i30	1.29	0	1.4	0	0	0	0	16.36	0	12.77	9.79	0	0	0	0	0	0	8.28	0	3.26	1.07	0	21.92	13.79	3.07	0	0	0	53.69	0	0		ZNFX1	MOUSENFX1-type zinc finger-containing protein 1 OS=Mus musculus OX=10090 GN=Znfx1 PE=1 SV=3
TRINITY_DN1266_c0_g1_i14	0	0	0	0	0	0	5.84	0	0	0	39.01	8.41	49.64	0	0	26.26	11.58	0	24.34	117.09	4.53	25.81	19.22	58.71	220.55	0	0	0	0	0	0		ZNFX1	MOUSENFX1-type zinc finger-containing protein 1 OS=Mus musculus OX=10090 GN=Znfx1 PE=1 SV=3
TRINITY_DN1266_c0_g1_i23	24.9	26.27	23.76	35.92	23.46	23.08	28.68	20.37	36.13	17.04	29.59	2.12	53.91	20.66	0	20.22	12.79	0.52	42.45	43.49	13.64	17.81	28.36	110.05	52.18	57.55	110.33	33.57	62.15	0	6.5		ZNFX1	MOUSENFX1-type zinc finger-containing protein 1 OS=Mus musculus OX=10090 GN=Znfx1 PE=1 SV=3
TRINITY_DN1266_c0_g1_i32	1.54	10.91	6.82	0	1.57	0	2.46	1.98	3.6	4.73	0	0	7.72	4.3	0	0	1.3	0	7.36	4.04	4.5	1.7	0	12.44	6.62	3.8	2.36	0	0	0	3.03		ZNFX1	MOUSENFX1-type zinc finger-containing protein 1 OS=Mus musculus OX=10090 GN=Znfx1 PE=1 SV=3
TRINITY_DN36666_c0_g1_i10	0	0	4	2.34	1	0	1	1	0	0	2	1	1	2	0	0	1	0	1	0	1	0	0	0	0	1	2	0	1	0	0		ZNFX1	MOUSENFX1-type zinc finger-containing protein 1 OS=Mus musculus OX=10090 GN=Znfx1 PE=1 SV=3
TRINITY_DN87435_c0_g1_i1	0	0	0	0	0	0	0	0	0	0	0	0	0	0	1	0	0	0	0	0	0	0	0	0	0	0	0	0	0	0	0		ZNFX1	MOUSENFX1-type zinc finger-containing protein 1 OS=Mus musculus OX=10090 GN=Znfx1 PE=1 SV=3
TRINITY_DN22599_c0_g1_i1	0	0	0	0	0	0	0	0	0	0	0	0	0	0	59.65	0	0	0	0	1	0	0	0	0	0	0	0	0	0	0	0		ZNFX1	MOUSENFX1-type zinc finger-containing protein 1 OS=Mus musculus OX=10090 GN=Znfx1 PE=1 SV=3
TRINITY_DN5170_c0_g1_i3	0	0	9.48	0	8.82	0	8.98	0	0	19.43	0	0	0	0	0	0	0	0	0	0	3.8	0	0.09	0	0	18.88	0	0	0	1.76	0		ZNFX1	MOUSENFX1-type zinc finger-containing protein 1 OS=Mus musculus OX=10090 GN=Znfx1 PE=1 SV=3
TRINITY_DN17186_c0_g1_i1	3	0	6	0	0	0	2	0	0	0	0	0	5.52	0	0	1	1	0	1	2	0	0	3	10.75	0	0	0	2.96	6.35	3.72	2		ZNFX1	MOUSENFX1-type zinc finger-containing protein 1 OS=Mus musculus OX=10090 GN=Znfx1 PE=1 SV=3
TRINITY_DN23900_c0_g1_i12	0	0	0	3.01	0	0	0	2.93	0	0	0	0	0	0	0	0	0	0	0	7.89	1.51	1.92	0	0	0	0	0	2.08	0	0	0		ZNFX1	MOUSENFX1-type zinc finger-containing protein 1 OS=Mus musculus OX=10090 GN=Znfx1 PE=1 SV=3
TRINITY_DN1266_c1_g1_i3	44	22	60	37	35	45	46	24	11	20	42	12	62	25	1	24	7	1	29	20	11	15	10	30	10	18	16	14	21	0	2		ZNFX1	MOUSENFX1-type zinc finger-containing protein 1 OS=Mus musculus OX=10090 GN=Znfx1 PE=1 SV=3
TRINITY_DN41304_c0_g1_i3	6.28	7	8.44	0	0	0	0	10.27	2	0	0	1.96	0	2.07	0	2.1	1	0	2.06	0	0	0	2.11	0	0	0	0	0	0	0	0		ZNFX1	MOUSENFX1-type zinc finger-containing protein 1 OS=Mus musculus OX=10090 GN=Znfx1 PE=1 SV=3
TRINITY_DN11286_c0_g2_i7	1	1	0	0	0	0	0	0	0	0.92	0	0	0	0	0	0	0	0	0	0	0	0	0	7.2	2.03	0	1.68	0	0	0	0		ZNFX1	MOUSENFX1-type zinc finger-containing protein 1 OS=Mus musculus OX=10090 GN=Znfx1 PE=1 SV=3
TRINITY_DN23900_c0_g1_i6	0	0	0	1.4	1.53	3	1.41	1.97	1	0	2	0	1.36	0	0	0	1	0	2.87	0	0	0	0	2.04	3.93	0	1.16	0	0	0	0		ZNFX1	MOUSENFX1-type zinc finger-containing protein 1 OS=Mus musculus OX=10090 GN=Znfx1 PE=1 SV=3
TRINITY_DN9582_c1_g1_i1	1	2	1	1	1	3	1	0	4	4	4	5	2	3	0	0	0	0	1	2	3	3	2	7	3	6	9	7	3	0	0		ZNFX1	MOUSENFX1-type zinc finger-containing protein 1 OS=Mus musculus OX=10090 GN=Znfx1 PE=1 SV=3
TRINITY_DN30299_c0_g1_i1	0	15	0	7	0	22	0	24	0	14	0	0	33	0	0	0	0	0	0	0	0	0	0	0	13	14	0	0	0	0	0		ZNFX1	MOUSENFX1-type zinc finger-containing protein 1 OS=Mus musculus OX=10090 GN=Znfx1 PE=1 SV=3
TRINITY_DN11286_c0_g1_i1	3.2	1	6	1	4	1	3.84	2	1	0	0	0	6.74	4	0	0	1	0	4.1	2	2	0.99	3.01	6.01	1	0	0	0	1	0	0		ZNFX1	HUMANNFX1-type zinc finger-containing protein 1 OS=Homo sapiens OX=9606 GN=ZNFX1 PE=2 SV=2
TRINITY_DN19071_c0_g1_i6	0	1	2	3	0	0	0	2	0	0	0	0	0	2	0	0	0	0	0	2	0	0	0	1.47	0	0	0	0.5	0	0	0.5		ZNFX1	HUMANNFX1-type zinc finger-containing protein 1 OS=Homo sapiens OX=9606 GN=ZNFX1 PE=2 SV=2
TRINITY_DN19071_c0_g1_i1	1	0	0	0	1	0	0	0	1.2	0.5	0	0	0	0	0	0	1.5	1	2	0	0	0	0	2.7	0	0	0	0	0.99	0	0		ZNFX1	HUMANNFX1-type zinc finger-containing protein 1 OS=Homo sapiens OX=9606 GN=ZNFX1 PE=2 SV=2
TRINITY_DN17186_c0_g1_i4	0	0	0	0	0	0	0	0	0	0	0	0	0	0	0	0	0	0	0	0	0	0	0	0	0	0	0	0.75	0	0	0		ZNFX1	HUMANNFX1-type zinc finger-containing protein 1 OS=Homo sapiens OX=9606 GN=ZNFX1 PE=2 SV=2
TRINITY_DN5001_c2_g1_i5	1.13	5.27	2.73	4.83	0	2.87	4.68	0	0	0	0	1.4	0.7	0	0.5	0	0	2.62	0	0	0	0	0	0	3.33	1.79	22.2	9.17	3.04	0	0		ZNFX1	HUMANNFX1-type zinc finger-containing protein 1 OS=Homo sapiens OX=9606 GN=ZNFX1 PE=2 SV=2
TRINITY_DN4201_c0_g1_i8	0	4.7	51.19	0	22.93	4.9	0	39.41	24.41	44	51.96	8.01	0	16.84	4	0	0	0	0	0	0	13.65	26	0	0	14.25	0	13.87	0	0	2		ZNFX1	HUMANNFX1-type zinc finger-containing protein 1 OS=Homo sapiens OX=9606 GN=ZNFX1 PE=2 SV=2
TRINITY_DN30450_c0_g1_i1	0	0	0	0	0	1	0	8	2	17	0	0	0	2	0	7	0	0	3	0	0	1	2	0	0	0	0	3	2	1	0		ZNFX1	HUMANNFX1-type zinc finger-containing protein 1 OS=Homo sapiens OX=9606 GN=ZNFX1 PE=2 SV=2
TRINITY_DN11286_c0_g2_i2	0	0	0	0	0	2	0	0	0	0	0	0	0	0	1	0	0	0	0	0	0	0	0	1.48	0	0	4.57	0	0	0	0		ZNFX1	HUMANNFX1-type zinc finger-containing protein 1 OS=Homo sapiens OX=9606 GN=ZNFX1 PE=2 SV=2
TRINITY_DN18498_c0_g1_i1	0	0	1	1	0	1	0	2	0	0	1	0	0	2	0	0	0	0	1	1	1	2	0	3	0	0	0	0	2	0	0		ZNFX1	HUMANNFX1-type zinc finger-containing protein 1 OS=Homo sapiens OX=9606 GN=ZNFX1 PE=2 SV=2
TRINITY_DN40821_c0_g1_i1	0	0	0	0	0	0	0	0	0	0	0	0	0	0	0	0	0	0	0	0	0	0	0	1	0	0	0	0	0	0	0		ZNFX1	HUMANNFX1-type zinc finger-containing protein 1 OS=Homo sapiens OX=9606 GN=ZNFX1 PE=2 SV=2
TRINITY_DN4201_c0_g1_i2	40.72	32.69	0	37.9	9.13	6.22	17.7	0	0	0	0	12.81	5.53	0	0	32.69	6.55	2.45	44.84	14.74	7.74	0	0	23.83	16.93	4.57	0	0	7.36	0	0		ZNFX1	HUMANNFX1-type zinc finger-containing protein 1 OS=Homo sapiens OX=9606 GN=ZNFX1 PE=2 SV=2
TRINITY_DN11286_c0_g2_i9	0	1	1	1	0	2	0	3	0	0	2	0	0	6	0	0	0	0	3	6	7	1	2	8	0	0	0	2	3	0	0		ZNFX1	HUMANNFX1-type zinc finger-containing protein 1 OS=Homo sapiens OX=9606 GN=ZNFX1 PE=2 SV=2
TRINITY_DN5170_c0_g1_i2	20.59	55.45	15.15	20.86	16.68	15.65	34.89	5.75	83	41.57	48.13	24.98	20.3	45.73	0	35.95	13.58	0	31.31	26.02	1.85	42.12	0	32.04	0.85	42.04	67.76	37.92	28.64	9.6	0.62		ZNFX1	HUMANNFX1-type zinc finger-containing protein 1 OS=Homo sapiens OX=9606 GN=ZNFX1 PE=2 SV=2
TRINITY_DN19615_c0_g1_i3	0.5	2	0	0	0	0	0	0	0	1	0	0	0	0	0	0	0	0	0.5	1	0	0	0	1	0	0	0	0	0	0	0		ZNFX1	HUMANNFX1-type zinc finger-containing protein 1 OS=Homo sapiens OX=9606 GN=ZNFX1 PE=2 SV=2
TRINITY_DN19071_c0_g1_i2	0	1	0	2	0	2	0	1	0	0	2	0	0	0	0	0	0	0	0	1	0	0	2	1	0	0	0	0	0	0	0		ZNFX1	HUMANNFX1-type zinc finger-containing protein 1 OS=Homo sapiens OX=9606 GN=ZNFX1 PE=2 SV=2
TRINITY_DN5001_c2_g1_i2	1.85	0	0	0	0	2.62	0	2.49	2.44	4	0.85	0.2	6.65	2.34	0	0	2	0	0.62	6.67	2	0	2.03	1.61	3.33	6.56	11.1	1.67	0	0	0		ZNFX1	HUMANNFX1-type zinc finger-containing protein 1 OS=Homo sapiens OX=9606 GN=ZNFX1 PE=2 SV=2
TRINITY_DN50943_c1_g2_i1	0	0	0	0	0	0	0	0	0	0	0	0	0	0	19	0	0	0	0	0	0	0	0	0	0	0	0	0	0	0	0		ZNFX1	HUMANNFX1-type zinc finger-containing protein 1 OS=Homo sapiens OX=9606 GN=ZNFX1 PE=2 SV=2
TRINITY_DN19071_c0_g1_i8	0	2	0	0	0	1	0.97	0	0	2	0	0	8.99	0	0	0	1	1	1	0	0	3.5	6	12.55	2	1.01	1	0.5	6	0	0.5		ZNFX1	HUMANNFX1-type zinc finger-containing protein 1 OS=Homo sapiens OX=9606 GN=ZNFX1 PE=2 SV=2
TRINITY_DN19071_c0_g1_i15	0	0	0	1	0	0	1.41	0	1	0	0	4	0	0	0	0	0	0	0	2	0	2.41	0	0	0	0	11	1	1	0	0		ZNFX1	HUMANNFX1-type zinc finger-containing protein 1 OS=Homo sapiens OX=9606 GN=ZNFX1 PE=2 SV=2
TRINITY_DN19071_c0_g1_i11	0	3	1	0	3	0	1.59	2	4.8	0	0	0	2.25	2	0	0	0	0	0	1	1	1.09	0	1.32	0	0	2	0	2.01	0	0		ZNFX1	HUMANNFX1-type zinc finger-containing protein 1 OS=Homo sapiens OX=9606 GN=ZNFX1 PE=2 SV=2
TRINITY_DN9582_c1_g2_i1	0	0	6.41	0	0	0	3	0	7	0	1	0	0	3	0	3	0	0	0	0	0	11	0	1	0	0	21	6	11	0	0		ZNFX1	HUMANNFX1-type zinc finger-containing protein 1 OS=Homo sapiens OX=9606 GN=ZNFX1 PE=2 SV=2
TRINITY_DN4071_c0_g1_i4	0	4	4	8	0	0	0	0	0	0	0	0	0	0	0	0	0	0	0	0	0	0	2	5	0	0	0	3	9	0	0		ZNFX1	HUMANNFX1-type zinc finger-containing protein 1 OS=Homo sapiens OX=9606 GN=ZNFX1 PE=2 SV=2
TRINITY_DN11286_c0_g2_i1	0	0	2	1	0	0	3	0	4	0	0	2	0	4	0	2	0	0	0	0	0	6	0	0	0	0	11	6	10	0	0		ZNFX1	HUMANNFX1-type zinc finger-containing protein 1 OS=Homo sapiens OX=9606 GN=ZNFX1 PE=2 SV=2
TRINITY_DN5170_c0_g1_i8	8.83	12.71	0	0	0	19.41	0	0	0	0	34.87	0	50.5	0	0	17.38	0	0	0	0	23.88	32.88	33.57	11.6	0	8.27	38.24	0	28.35	0	0		ZNFX1	HUMANNFX1-type zinc finger-containing protein 1 OS=Homo sapiens OX=9606 GN=ZNFX1 PE=2 SV=2
TRINITY_DN4071_c0_g1_i3	0	0	0	0	0	3	0	4	0	0	5	0	0	9	0	0	0	0	5	14	8	6	0	0	0	0	0	0	0	0	0		ZNFX1	HUMANNFX1-type zinc finger-containing protein 1 OS=Homo sapiens OX=9606 GN=ZNFX1 PE=2 SV=2
TRINITY_DN4201_c0_g1_i5	35.24	0.17	0	18.6	5.38	19.62	18.27	0	0	0	0	4.18	19.13	0	0	4.31	8.68	2.55	5.16	1.98	10.26	0	0	18.74	9.07	14.18	17.23	0	19.22	0	0		ZNFX1	HUMANNFX1-type zinc finger-containing protein 1 OS=Homo sapiens OX=9606 GN=ZNFX1 PE=2 SV=2
TRINITY_DN1266_c0_g1_i3	2.52	10.02	2.01	10.59	6.33	6.64	10.53	13.16	11.45	12.41	0	0	15.86	1.57	2	10.01	3.94	2.13	8.26	10.55	6.83	1.52	7.92	13.79	19.44	28.07	25.66	5.32	9.68	2.01	0		ZNFX1	HUMANNFX1-type zinc finger-containing protein 1 OS=Homo sapiens OX=9606 GN=ZNFX1 PE=2 SV=2
TRINITY_DN85824_c0_g1_i1	0	0	0	0	0	0	0	0	0	0	0	0	0	0	2	0	0	0	0	0	0	0	0	0	0	0	0	0	0	0	0		ZNFX1	HUMANNFX1-type zinc finger-containing protein 1 OS=Homo sapiens OX=9606 GN=ZNFX1 PE=2 SV=2
TRINITY_DN50943_c1_g3_i1	0	0	0	0	0	0	0	0	0	0	0	0	0	0	18	0	0	0	0	0	0	0	0	0	0	0	0	0	0	0	0		ZNFX1	HUMANNFX1-type zinc finger-containing protein 1 OS=Homo sapiens OX=9606 GN=ZNFX1 PE=2 SV=2
TRINITY_DN32674_c0_g1_i1	0	0	0	0	0	0	0	2	2	0	0	0	0	0	0	0	0	0	0	0	0	0	1	2	0	1	0	0	1	0	0		ZNFX1	HUMANNFX1-type zinc finger-containing protein 1 OS=Homo sapiens OX=9606 GN=ZNFX1 PE=2 SV=2
TRINITY_DN17186_c0_g1_i2	0	0	0.96	0	0	0	2	1	1.99	0	0	0	0	1	0	0	0	0	0	0	0	0	0	0	0	0	2.92	2.06	7.04	0.99	1		ZNFX1	HUMANNFX1-type zinc finger-containing protein 1 OS=Homo sapiens OX=9606 GN=ZNFX1 PE=2 SV=2
TRINITY_DN10077_c0_g1_i1	0	0	0	0	0	0	1.58	0	0	0	0	1	0	0	0	0	0	0	0	0	0	0	0	0	0	0	3.65	0	4	0	0		ZNFX1	HUMANNFX1-type zinc finger-containing protein 1 OS=Homo sapiens OX=9606 GN=ZNFX1 PE=2 SV=2
TRINITY_DN5001_c2_g1_i4	3.02	3.31	0	4.64	2	2.65	2.01	5.34	5	3	0	2	6.95	1.29	0	0	0	0	2.32	2.98	5	1.28	0	5.41	13.06	15.97	13.98	0	1	0	0		ZNFX1	HUMANNFX1-type zinc finger-containing protein 1 OS=Homo sapiens OX=9606 GN=ZNFX1 PE=2 SV=2
TRINITY_DN40821_c0_g1_i3	0	0	0.97	0	0	0	0	0	0	0	0	0	1	0	0	0	0	0	0	0	0	1	0	0	0	0	1	0	0	0	0		ZNFX1	HUMANNFX1-type zinc finger-containing protein 1 OS=Homo sapiens OX=9606 GN=ZNFX1 PE=2 SV=2
TRINITY_DN5170_c0_g1_i4	11.58	16.48	10.68	0	3.5	0	29.13	24.25	0	0	0	28.02	21.49	19.33	0	0	15.42	4.79	20.25	12.21	0	0	0	17.13	20.61	5.31	0	8.96	0	3.64	0		ZNFX1	HUMANNFX1-type zinc finger-containing protein 1 OS=Homo sapiens OX=9606 GN=ZNFX1 PE=2 SV=2
TRINITY_DN36666_c0_g1_i3	0	3	1	0	0	0	0	0	0	0	1	0	0	0	0	0	0	0	1	3	1	0	0	4	0	0	0	0	0	0	0		ZNFX1	HUMANNFX1-type zinc finger-containing protein 1 OS=Homo sapiens OX=9606 GN=ZNFX1 PE=2 SV=2
TRINITY_DN1266_c9_g1_i2	0	0	1	1	0	1	0	0	1	1	0	0	1	0	0	0	1	0	1	0	0	0	1.37	1.23	2.55	5	1	2	4.57	1	0		ZNFX1	HUMANNFX1-type zinc finger-containing protein 1 OS=Homo sapiens OX=9606 GN=ZNFX1 PE=2 SV=2
TRINITY_DN4201_c0_g1_i7	4.04	0	4.18	16.5	16.56	22.38	43.03	4.59	0	0	0	0	105.34	11.8	0	0	6.77	0	0	20.28	0	2	0	6.43	0	0	14.77	0	6.97	0	0		ZNFX1	HUMANNFX1-type zinc finger-containing protein 1 OS=Homo sapiens OX=9606 GN=ZNFX1 PE=2 SV=2
TRINITY_DN17186_c0_g2_i1	0	0	0	0	1	0	0	2	1	0	1	0	0	0	0	0	0	0	0	0	0	0	1	0	4	0	1	0	0	0	0		ZNFX1	HUMANNFX1-type zinc finger-containing protein 1 OS=Homo sapiens OX=9606 GN=ZNFX1 PE=2 SV=2
TRINITY_DN19615_c0_g1_i2	0	0	1	0	0	0	0	1	0	0	0	1	0	0	0	0	0	0	0	0	1	0	1	0	1	0	0	0	1	0	0		ZNFX1	HUMANNFX1-type zinc finger-containing protein 1 OS=Homo sapiens OX=9606 GN=ZNFX1 PE=2 SV=2
TRINITY_DN19071_c0_g1_i3	0	0	0	0	1	0	0	0	0	1	0	0	2.75	0	0	1	0	0	0	0	0	0	0	0	2	0	1	0	1	0	0		ZNFX1	HUMANNFX1-type zinc finger-containing protein 1 OS=Homo sapiens OX=9606 GN=ZNFX1 PE=2 SV=2
TRINITY_DN1266_c3_g1_i1	0	0	0	0	0	0	0	0	0	0	0	1	0	0	0	1	0	0	0	0	0	0	0	0	1	1	1	0	0	0	0		ZNFX1	HUMANNFX1-type zinc finger-containing protein 1 OS=Homo sapiens OX=9606 GN=ZNFX1 PE=2 SV=2
TRINITY_DN10077_c0_g1_i2	0	1.35	0	0	0	1	3.43	1	2	0	0	0	5	0	0	0	2	0	1	4	2	0	0	1	2	5	5.36	0	2	0	1		ZNFX1	HUMANNFX1-type zinc finger-containing protein 1 OS=Homo sapiens OX=9606 GN=ZNFX1 PE=2 SV=2
TRINITY_DN10077_c0_g2_i1	4	6	1	4	6	4	7	5	1	0	2	3	11	1	0	4	1	1	0	2	0	5	2	8	1	1	5	0	3	0	0		ZNFX1	HUMANNFX1-type zinc finger-containing protein 1 OS=Homo sapiens OX=9606 GN=ZNFX1 PE=2 SV=2
TRINITY_DN1266_c9_g1_i1	0	0	2	0	0	0	2	0	0	0	0	0	2	0	0	1	0	0	0	0	1	0	1.63	2.77	1.45	0	0	0	2.43	0	0		ZNFX1	HUMANNFX1-type zinc finger-containing protein 1 OS=Homo sapiens OX=9606 GN=ZNFX1 PE=2 SV=2
TRINITY_DN16733_c0_g1_i1	0	0	0	0	0	0	0	4	3	5	0	0	0	1	0	3	0	0	4	0	0	1	0	0	0	0	0	0	4	0	0		ZNFX1	HUMANNFX1-type zinc finger-containing protein 1 OS=Homo sapiens OX=9606 GN=ZNFX1 PE=2 SV=2
TRINITY_DN17186_c0_g1_i5	0	3	0	0	0	0	0	1	1.55	0	0	0	4.48	1	0	0	0	0	0	2	0	0	1	3.25	1	0	1	0	1	1.28	0		ZNFX1	HUMANNFX1-type zinc finger-containing protein 1 OS=Homo sapiens OX=9606 GN=ZNFX1 PE=2 SV=2
TRINITY_DN19615_c0_g1_i1	0.5	0	1	0	0	0	0	0	0	0	0	0	0	0	0	0	0	0	0.5	0	0	0	0	1	0	1	0	0	2	0	0		ZNFX1	HUMANNFX1-type zinc finger-containing protein 1 OS=Homo sapiens OX=9606 GN=ZNFX1 PE=2 SV=2
TRINITY_DN19071_c0_g1_i16	0	2	0	0	0	0	2.03	0	0	0.5	1	2	0	0	0	0	1.5	0	0	0	0	0	0	1.02	0	4.03	3	0.76	0	0	0		ZNFX1	HUMANNFX1-type zinc finger-containing protein 1 OS=Homo sapiens OX=9606 GN=ZNFX1 PE=2 SV=2
TRINITY_DN5001_c2_g1_i6	0	0.77	7.27	4.83	0	2.86	4.7	9.17	8.56	0	3.82	1.4	0.7	10.37	0.5	10	0	0	19.66	10.89	0	10.72	6.42	21.53	0	0	14.1	11.16	26.53	0	0		ZNFX1	HUMANNFX1-type zinc finger-containing protein 1 OS=Homo sapiens OX=9606 GN=ZNFX1 PE=2 SV=2
TRINITY_DN5170_c0_g1_i6	0	0	60.69	47.46	0	32.46	0	0	0	0	0	0	40.7	0	0	0	0	0	0	0	3.96	0	47.34	0	27.35	0	0	0	0	0	1.46		ZNFX1	HUMANNFX1-type zinc finger-containing protein 1 OS=Homo sapiens OX=9606 GN=ZNFX1 PE=2 SV=2
TRINITY_DN4201_c0_g1_i4	0	1.45	77.63	0	0	10.89	0	0	20.59	0	13.04	0	0	33.35	0	0	0	0	0	0	0	20.35	0	0	0	0	0	5.13	1.46	0	0		ZNFX1	HUMANNFX1-type zinc finger-containing protein 1 OS=Homo sapiens OX=9606 GN=ZNFX1 PE=2 SV=2
TRINITY_DN22599_c0_g1_i2	0	0	0	0	0	0	0	0	0	0	0	0	0	0	4.35	0	0	0	0	0	0	0	0	0	0	0	0	0	0	0	0		ZNFX1	HUMANNFX1-type zinc finger-containing protein 1 OS=Homo sapiens OX=9606 GN=ZNFX1 PE=2 SV=2
TRINITY_DN4071_c0_g1_i2	0	1.7	3	1.83	0	0	0	0	1.43	0	0	0	3	0	0	0	0	0	2.16	0	0	0	0	6.18	0	1.59	1.9	2.29	4.56	0	0		ZNFX1	CAEELNFX1-type zinc finger-containing protein 1 homolog OS=Caenorhabditis elegans OX=6239 GN=znfx-1 PE=1 SV=1
TRINITY_DN4071_c0_g1_i8	0	4	3	4	5	2.61	4	5	3	2.44	2.28	0	7	6.83	0	2	2	0	5	5	3	1.43	1.27	8	4	0	1.1	1	2	0	0		ZNFX1	CAEELNFX1-type zinc finger-containing protein 1 homolog OS=Caenorhabditis elegans OX=6239 GN=znfx-1 PE=1 SV=1
TRINITY_DN9934_c0_g1_i7	10	11	14.95	12.26	0	0	6.3	0	5	0	0	0	0	10	0	7.55	4.99	0	0	0	0	0	11.63	0	0	0	0	5.62	0	1	2		ZN862	HUMANZinc finger protein 862 OS=Homo sapiens OX=9606 GN=ZNF862 PE=2 SV=2
TRINITY_DN39784_c0_g2_i2	0	0	0	0	0	0	0	0	0	0	0	0	0	0	5.31	0	0	0	0	0	0	0	0	0	0	0	0	0	0	0	0		ZN862	HUMANZinc finger protein 862 OS=Homo sapiens OX=9606 GN=ZNF862 PE=2 SV=2
TRINITY_DN65560_c0_g1_i1	0	0	0	0	0	0	0	0	0	0	0	0	0	0	2	0	0	0	0	0	0	0	0	0	0	0	0	0	0	0	0		ZN862	HUMANZinc finger protein 862 OS=Homo sapiens OX=9606 GN=ZNF862 PE=2 SV=2
TRINITY_DN8337_c1_g2_i1	6	0	1	0	2	1	2	1	3	1	1	0	5	0	0	3	3	1	2	4	1	3	2	4	0	2	4	9	1	2	4		ZN862	HUMANZinc finger protein 862 OS=Homo sapiens OX=9606 GN=ZNF862 PE=2 SV=2
TRINITY_DN43149_c0_g1_i7	4.58	6	0	0	0	0	11	0	0	0	2.34	0	0	0	0	0	0	0	0	0	0	0	0	0	2.92	0	0	6.14	0	0	0		ZN862	HUMANZinc finger protein 862 OS=Homo sapiens OX=9606 GN=ZNF862 PE=2 SV=2
TRINITY_DN120440_c0_g1_i1	0	0	0	0	0	0	0	0	0	0	0	0	0	0	3	0	0	0	0	0	0	0	0	0	0	0	0	0	0	0	0		ZN862	HUMANZinc finger protein 862 OS=Homo sapiens OX=9606 GN=ZNF862 PE=2 SV=2
TRINITY_DN43149_c0_g1_i12	2.42	0	6.89	0	6	1	0	2	0	0	0	0	6.49	0	0	0	5	0	5.6	5.35	5.57	4	0	2	2.73	5	0	0	0	0	5		ZN862	HUMANZinc finger protein 862 OS=Homo sapiens OX=9606 GN=ZNF862 PE=2 SV=2
TRINITY_DN43149_c0_g1_i13	0	0	0	0	0	0	0	0	0	0	0	0	0	0	0	0	0	0	0	0	0	0	1	0	0	0	0	0	0	0	0		ZN862	HUMANZinc finger protein 862 OS=Homo sapiens OX=9606 GN=ZNF862 PE=2 SV=2
TRINITY_DN55663_c0_g1_i2	0	0	2	0	0	0	0	2	5	2	0	0	5	0	0	0	0	0	0	0	0	0	0	2	0	0	0	5	0	0	1		ZN862	HUMANZinc finger protein 862 OS=Homo sapiens OX=9606 GN=ZNF862 PE=2 SV=2
TRINITY_DN43149_c0_g1_i1	0	0	3.11	4.79	0	0	0	0	0	0	0.02	7.18	21.51	8.65	0	0	0	0	0	1.95	0	0	0	0	0	0	0	0	12	0	0		ZN862	HUMANZinc finger protein 862 OS=Homo sapiens OX=9606 GN=ZNF862 PE=2 SV=2
TRINITY_DN118797_c0_g1_i1	0	0	0	0	0	0	0	0	0	0	0	0	0	0	4	0	0	0	0	0	0	0	0	0	0	0	0	0	0	0	0		ZN830	XENTRZinc finger protein 830 OS=Xenopus tropicalis OX=8364 GN=znf830 PE=2 SV=1
TRINITY_DN2863_c0_g1_i1	93.04	39.89	99.04	57.29	112.31	96.54	44.86	54.43	57.87	43.99	48.08	23.75	69.53	83	2.98	97.97	45	19.33	90.29	91.5	75.1	114.67	66.81	100.3	98	85.65	105.02	117.06	95.81	27.18	54.38		ZN830	XENLAZinc finger protein 830 OS=Xenopus laevis OX=8355 GN=znf830 PE=2 SV=1
TRINITY_DN2863_c0_g1_i3	0	12.62	18.61	19.57	0	22.79	38.81	0	11.62	17.79	0	0	18.63	0	0	0	0	0	0	0	0	0	10.8	16.02	0	0	22.38	9.93	0	9.38	0		ZN830	XENLAZinc finger protein 830 OS=Xenopus laevis OX=8355 GN=znf830 PE=2 SV=1
TRINITY_DN2863_c0_g1_i7	0	24.33	0	0	0	0	0	0	0	0	0	0	29.84	0	0	0	0	0	0	0	0	13.61	33.16	35.61	0	35.35	0	13.41	0	0	0		ZN830	XENLAZinc finger protein 830 OS=Xenopus laevis OX=8355 GN=znf830 PE=2 SV=1
TRINITY_DN63118_c0_g1_i1	0	0	0	0	0	0	0	0	0	0	0	0	0	0	4	0	0	0	0	0	0	0	0	0	0	0	0	0	0	0	0		ZN711	DANREZinc finger protein 711 OS=Danio rerio OX=7955 GN=znf711 PE=1 SV=1
TRINITY_DN29038_c0_g1_i1	0	0	0	0	0	0	0	1	0	0	0	0	0	0	0	1	0	0	0	0	0	0	0	0	0	0	0	0	0	0	0		ZN711	DANREZinc finger protein 711 OS=Danio rerio OX=7955 GN=znf711 PE=1 SV=1
TRINITY_DN1427_c0_g1_i5	26.83	0	0	15.99	8.98	40.84	36.9	29.37	10.59	0	38.83	25.4	0	108.17	0	80.86	42	4.24	50.05	40.02	58.92	0	0	0	79.55	53.15	0	51.95	53.89	3.53	0		ZN706	CHICKZinc finger protein 706 OS=Gallus gallus OX=9031 GN=ZNF706 PE=3 SV=1
TRINITY_DN1427_c0_g1_i13	10.29	13.23	33.16	0	10.41	0	0	0	38.64	12.13	0	9.5	100.55	80.53	0	0	0	3.76	0	27.32	2.68	112.05	28.12	35.54	0	18.42	48.99	0	0	0	0		ZN706	CHICKZinc finger protein 706 OS=Gallus gallus OX=9031 GN=ZNF706 PE=3 SV=1
TRINITY_DN1427_c0_g1_i4	0	0	1.38	5.93	4.75	0	0	1.83	0	1.72	4.5	2.22	6.02	5.37	2	0	0	0	0	0	0	4.39	2.45	0	2.99	1.76	0	5.37	5.18	1.25	5.03		ZN706	CHICKZinc finger protein 706 OS=Gallus gallus OX=9031 GN=ZNF706 PE=3 SV=1
TRINITY_DN1427_c0_g1_i19	7.88	8.37	20.45	25.11	7.13	0	2.08	0	0	10.83	2.1	6.01	34.13	33.49	0	19.87	0	0	4.06	3.04	22	46.59	30.58	25.01	0	15.67	14.57	0	3.96	1.22	3.97		ZN706	CHICKZinc finger protein 706 OS=Gallus gallus OX=9031 GN=ZNF706 PE=3 SV=1
TRINITY_DN1427_c0_g1_i6	0	0	0	0	9.74	9.16	0	0	0	0	4.64	0	0	52.07	0	2.94	0	0	35	9.44	18.46	0	44.37	0	0	0	0	19.78	0	0	0		ZN706	CHICKZinc finger protein 706 OS=Gallus gallus OX=9031 GN=ZNF706 PE=3 SV=1
TRINITY_DN78793_c0_g1_i1	0	0	0	0	0	0	0	0	0	0	0	0	0	0	4	0	0	0	0	0	0	0	0	0	0	0	0	0	0	0	0		ZN622	RATZinc finger protein 622 OS=Rattus norvegicus OX=10116 GN=Znf622 PE=1 SV=2
TRINITY_DN121368_c0_g1_i1	0	0	0	0	0	0	0	0	0	0	0	0	0	0	3	0	0	0	0	0	0	0	0	0	0	0	0	0	0	0	0		ZN622	HUMANZinc finger protein 622 OS=Homo sapiens OX=9606 GN=ZNF622 PE=1 SV=1
TRINITY_DN12645_c0_g1_i1	2.98	9.88	12.03	11.43	13.35	10.41	11.58	18.29	0	12.03	29.47	3.23	6.39	10.29	0	0	0	0	7.41	0	2.46	0	2.45	23.49	10.49	17.36	0	0	12.13	5.73	11.18		ZN622	HUMANZinc finger protein 622 OS=Homo sapiens OX=9606 GN=ZNF622 PE=1 SV=1
TRINITY_DN101924_c0_g1_i1	0	0	0	0	0	0	0	0	0	0	0	0	0	0	5	0	0	0	0	0	0	0	0	0	0	0	0	0	0	0	0		ZN622	CHICKZinc finger protein 622 OS=Gallus gallus OX=9031 GN=ZNF622 PE=2 SV=1
TRINITY_DN3099_c0_g1_i14	0	41.3	0	28.34	0	0	0	0	0	0	0	0	22.82	8.41	0	0	3.38	0	8.11	14.82	16.23	9.39	0	0	0	16.09	0	12.22	22.47	12.62	16.83		ZN609	HUMANZinc finger protein 609 OS=Homo sapiens OX=9606 GN=ZNF609 PE=1 SV=2
TRINITY_DN3099_c0_g1_i13	240.72	6.13	0	0	95.35	120.72	260.39	0	209.17	200.59	335.13	0	0	361.57	0	394.37	110.93	14.2	2.31	0	0	334.18	125.22	389.03	438.86	205.3	0	219.28	151.96	16.11	123.5		ZN609	HUMANZinc finger protein 609 OS=Homo sapiens OX=9606 GN=ZNF609 PE=1 SV=2
TRINITY_DN3099_c0_g1_i1	114.67	2.93	320.53	39.72	232.33	0	0	130.28	98.19	0	0	118.67	0	8.16	2.62	0	47.77	0	143.22	3.7	0	0	0	87.82	34.33	0	42.43	0	0	18.86	55.41		ZN609	HUMANZinc finger protein 609 OS=Homo sapiens OX=9606 GN=ZNF609 PE=1 SV=2
TRINITY_DN3099_c0_g1_i19	18.61	4.9	21.39	0	32.32	0	16.89	44.72	63.64	47.57	23.87	15.74	0	16.35	0	27.63	4.74	0	0.49	0.36	0	22.52	0	22.56	7.81	9.08	16.31	10.75	9.64	5.19	43.18		ZN609	HUMANZinc finger protein 609 OS=Homo sapiens OX=9606 GN=ZNF609 PE=1 SV=2
TRINITY_DN3099_c0_g1_i9	0	82.55	0	22.67	0	0	0	0	0	0	0	0	617.28	161.56	0	0	68.13	57.6	48.7	0	3.85	156.87	127.78	0	0	381.86	0	245.15	304.5	31.89	45.16		ZN609	HUMANZinc finger protein 609 OS=Homo sapiens OX=9606 GN=ZNF609 PE=1 SV=2
TRINITY_DN3099_c0_g1_i12	0	0	0	0	0	0	0	0	0	12.84	0	0	8.9	10.43	0	0	0	0	0	0	0	20.04	0	27.59	0	11.67	8.76	25.6	38.43	7.73	37.02		ZN609	HUMANZinc finger protein 609 OS=Homo sapiens OX=9606 GN=ZNF609 PE=1 SV=2
TRINITY_DN3099_c0_g1_i7	0	40.83	0	188.6	0	0	0	0	0	0	0	0	0	3.51	22.38	0	29.06	0	93.26	208.19	98.41	0	30.75	0	0	0	0	0	0	36.6	19.97		ZN609	HUMANZinc finger protein 609 OS=Homo sapiens OX=9606 GN=ZNF609 PE=1 SV=2
TRINITY_DN3099_c0_g1_i21	0	88.37	121.08	178.66	0	382.28	71.72	116	0	0	0	53.59	0	0	0	0	0	14.2	77.9	236.94	76.52	0	30.24	0	0	0	519.5	0	0	0	39.93		ZN609	HUMANZinc finger protein 609 OS=Homo sapiens OX=9606 GN=ZNF609 PE=1 SV=2
TRINITY_DN37126_c0_g1_i2	0	0	0	0	0	0	0	0	0	0	0	0	0	0	379.12	0	0	0	0	0	0	0	0	0	0	1	0	0	0	0	0		ZN609	HUMANZinc finger protein 609 OS=Homo sapiens OX=9606 GN=ZNF609 PE=1 SV=2
TRINITY_DN11997_c0_g2_i6	0	1.6	1.53	0	5.76	1.24	3.23	2.89	0	17	6.92	0	8.47	9.32	0	2.39	1.87	0	0	3.39	4.42	0	0	4.12	0	2.26	0	6	5.74	3.11	5.85		ZN608	MOUSEZinc finger protein 608 OS=Mus musculus OX=10090 GN=Znf608 PE=1 SV=1
TRINITY_DN11997_c0_g2_i4	3.49	0.07	0.14	10.22	0	0.13	0	0.17	0	0	0	5.41	0.53	0.93	0	0	0.13	0	0	0	0.42	0	0	0.59	0	0.23	4.39	0	0	0.22	0.41		ZN608	MOUSEZinc finger protein 608 OS=Mus musculus OX=10090 GN=Znf608 PE=1 SV=1
TRINITY_DN514_c0_g1_i15	18.3	10.4	22.71	15.49	12.16	14.13	48.91	27.11	30.03	13.96	0	20.08	89.07	174.6	0	0	0	0.01	72.9	11.47	55.25	5.51	65.64	18.37	20.6	85.07	21.45	28.2	0	11.24	20.99		ZN598	HUMANE3 ubiquitin-protein ligase ZNF598 OS=Homo sapiens OX=9606 GN=ZNF598 PE=1 SV=1
TRINITY_DN514_c0_g1_i39	0	0	0	14.52	9.25	0	0	0	6.04	0	9.43	22.53	0	11.78	0	0	15.41	0	3.59	12.39	0	0	0	28.52	8.94	21.44	0	10.35	0	0	0		ZN598	HUMANE3 ubiquitin-protein ligase ZNF598 OS=Homo sapiens OX=9606 GN=ZNF598 PE=1 SV=1
TRINITY_DN49408_c0_g1_i1	0	0	0	0	0	0	0	0	0	0	0	0	0	0	32.54	0	0	0	0	0	0	0	0	0	0	0	0	0	0	0	0		ZN598	HUMANE3 ubiquitin-protein ligase ZNF598 OS=Homo sapiens OX=9606 GN=ZNF598 PE=1 SV=1
TRINITY_DN49408_c0_g1_i2	0	0	0	0	0	0	0	0	0	0	0	0	0	0	13.46	0	0	0	0	0	0	0	0	0	0	0	0	0	0	0	0		ZN598	HUMANE3 ubiquitin-protein ligase ZNF598 OS=Homo sapiens OX=9606 GN=ZNF598 PE=1 SV=1
TRINITY_DN8545_c0_g1_i3	14.32	9.52	14.2	22.52	13.15	14.17	15.56	17.54	8.38	4.56	7.21	4.82	16.47	10.74	3.62	8.27	14.34	1.19	11.97	20.56	5.9	14.36	3.92	24.93	14.42	19.3	16.05	15.55	7.13	0	0		ZN593	XENTRZinc finger protein 593 OS=Xenopus tropicalis OX=8364 GN=znf593 PE=2 SV=1
TRINITY_DN56474_c0_g1_i1	0	0	0	0	0	0	0	0	0	0	0	0	0	0	6	0	0	0	0	0	0	0	0	0	0	0	0	0	0	0	0		ZN593	XENTRZinc finger protein 593 OS=Xenopus tropicalis OX=8364 GN=znf593 PE=2 SV=1
TRINITY_DN8545_c0_g1_i4	0	1	0	0	0	1.2	0	0	0	0	0	0	0	0	0	0	0.05	0	0	0	0	0	1.7	0	0	1.86	0	0	0	0	0		ZN593	XENTRZinc finger protein 593 OS=Xenopus tropicalis OX=8364 GN=znf593 PE=2 SV=1
TRINITY_DN8545_c0_g1_i2	8.68	8.48	18.8	9.48	3.85	12.63	6.44	4.46	5.62	3.44	4.79	2.18	14.53	8.26	0.38	13.73	4.62	0.81	13.03	8.44	3.1	10.64	5.38	5.07	0.58	2.84	4.95	6.45	5.87	0	1		ZN593	XENTRZinc finger protein 593 OS=Xenopus tropicalis OX=8364 GN=znf593 PE=2 SV=1
TRINITY_DN108461_c0_g1_i1	0	0	0	0	0	0	0	0	0	0	0	0	0	0	11	0	0	0	0	0	0	0	0	0	0	0	0	0	0	0	0		ZN541	HUMANZinc finger protein 541 OS=Homo sapiens OX=9606 GN=ZNF541 PE=1 SV=3
TRINITY_DN12543_c0_g1_i3	4.91	0	0	0	0	0	0	8	0	0	2.93	0	0	10.26	0	0	5.47	0	0	0	0	0	9.45	0	0	0	0	0	0	0	0		ZN526	MOUSEZinc finger protein 526 OS=Mus musculus OX=10090 GN=Znf526 PE=2 SV=1
TRINITY_DN12543_c0_g1_i2	17.09	11	25	32	19	31	22	0	35	15	11.07	10	50	20.74	1	41	10.53	4	49	32	9	36	23.55	28	41	41	38	36	26	21	36		ZN526	MOUSEZinc finger protein 526 OS=Mus musculus OX=10090 GN=Znf526 PE=2 SV=1
TRINITY_DN46178_c0_g1_i1	0	0	0	0	0	0	0	0	0	0	0	0	0	0	4	0	0	0	0	0	0	0	0	0	0	0	0	0	0	0	0		ZN512	MACFAZinc finger protein 512 OS=Macaca fascicularis OX=9541 GN=ZNF512 PE=2 SV=1
TRINITY_DN57487_c0_g1_i1	0	0	0	0	0	0	0	0	0	0	0	0	0	0	7	0	0	0	0	0	0	0	0	0	0	0	0	0	0	0	0		ZN483	HUMANZinc finger protein 483 OS=Homo sapiens OX=9606 GN=ZNF483 PE=1 SV=3
TRINITY_DN49141_c0_g1_i1	0	0	0	0	0	0	0	0	0	0	0	0	0	0	0	4	0	0	0	0	3	10	8	1.99	0	2	5	4.86	0	17.52	30.96		ZN474	BOVINZinc finger protein 474 OS=Bos taurus OX=9913 GN=ZNF474 PE=2 SV=1
TRINITY_DN49141_c0_g1_i2	1	0	4	5	1	1	0	4	3	0	3	4	2	6	0	0	1	1	3	0	0	0	0	2.01	5	0	0	5.14	1	4.48	4.04		ZN474	BOVINZinc finger protein 474 OS=Bos taurus OX=9913 GN=ZNF474 PE=2 SV=1
TRINITY_DN22309_c0_g1_i2	0	0	0	0	0	0	0	0	0	0	0	1	0	0	0	0	0	0	0	0	0	0	1	0	0	0	1	1	0	0	0		ZN397	BOVINZinc finger protein 397 OS=Bos taurus OX=9913 GN=ZNF397 PE=2 SV=1
TRINITY_DN22926_c0_g2_i1	0	1	1	1	1	0	1	1	0	0	0	1	3	0	0	0	0	0	1	1	0	0	0	1	1	0	0	1	0	0	0		ZN397	BOVINZinc finger protein 397 OS=Bos taurus OX=9913 GN=ZNF397 PE=2 SV=1
TRINITY_DN29639_c0_g1_i1	0	0	0	0	0	0	0	0	0	0	0	0	0	0	4	0	0	0	0	0	0	0	0	0	0	0	0	0	0	0	0		ZN363	MOUSERING finger and CHY zinc finger domain-containing protein 1 OS=Mus musculus OX=10090 GN=Rchy1 PE=1 SV=1
TRINITY_DN29639_c0_g1_i3	0	0	0	0	0	0	0	0	0	0	0	0	0	0	0	0	0	0	0	0	0	0	0	0	0	0	0	0	0	0	0		ZN363	MOUSERING finger and CHY zinc finger domain-containing protein 1 OS=Mus musculus OX=10090 GN=Rchy1 PE=1 SV=1
TRINITY_DN29639_c0_g1_i2	0	0	0	0	0	0	0	0	0	0	0	0	0	0	2	0	0	0	0	0	0	0	0	0	0	0	0	0	0	0	0		ZN363	HUMANRING finger and CHY zinc finger domain-containing protein 1 OS=Homo sapiens OX=9606 GN=RCHY1 PE=1 SV=1
TRINITY_DN38190_c0_g1_i1	0	0	0	0	0	0	0	0	0	0	0	0	0	0	1	0	0	0	0	0	0	0	0	0	0	0	0	0	0	0	0		ZN363	HUMANRING finger and CHY zinc finger domain-containing protein 1 OS=Homo sapiens OX=9606 GN=RCHY1 PE=1 SV=1
TRINITY_DN17328_c0_g1_i2	20	6.83	37	23	13	35	14	14	12.41	15.02	14	6.82	59	28	1	27	14	5	20	23	19	27	16	22	22	23	14	10.14	15	38.79	44.79		ZN346	XENLAZinc finger protein 346 OS=Xenopus laevis OX=8355 GN=znf346 PE=1 SV=1
TRINITY_DN8786_c0_g1_i3	0	4.04	8.14	0	2.91	0	0	0	0	0	0	1.86	0	6.29	0	0	0	0	0	0	0	0	0	7.17	0	9.73	0	0	0	0	0		ZN330	MOUSEZinc finger protein 330 OS=Mus musculus OX=10090 GN=Znf330 PE=1 SV=1
TRINITY_DN8786_c0_g1_i9	0	4.37	0	0	0	7.39	7.74	0	0	0	0	0	0	5.33	0	0	0	0	0	0	0	0	0	7.54	5.58	0	0	0	0	0	4.49		ZN330	MOUSEZinc finger protein 330 OS=Mus musculus OX=10090 GN=Znf330 PE=1 SV=1
TRINITY_DN8786_c0_g1_i2	1	2	4	1	0	1	0	0	0	0	1	0	2	1	0	0	2.42	0	1.08	0	1	0	0	0	0	0	0	1.11	2	0	3		ZN330	MOUSEZinc finger protein 330 OS=Mus musculus OX=10090 GN=Znf330 PE=1 SV=1
TRINITY_DN8786_c0_g1_i8	0	0	0	1.35	0	0	0	0	0	0	0	0.32	0	0	0	0	0	0	0	0	1.07	0	0	0	0	0	1	0	1	0	0.99		ZN330	MOUSEZinc finger protein 330 OS=Mus musculus OX=10090 GN=Znf330 PE=1 SV=1
TRINITY_DN8786_c0_g1_i7	29	20.59	27.86	39.65	16.09	22.61	39.26	0	0	0	0	8.81	0	14.39	1	36	10.58	6	35.92	29	12.93	20	15	11.28	9.42	20.27	20	16	14	6	2.52		ZN330	HUMANZinc finger protein 330 OS=Homo sapiens OX=9606 GN=ZNF330 PE=1 SV=1
TRINITY_DN8786_c0_g1_i5	0	0	0	0	0	0	0	23	25	18	21	0	29	0	0	0	0	0	0	0	0	0	0	0	0	0	0	11.89	0	0	0		ZN330	HUMANZinc finger protein 330 OS=Homo sapiens OX=9606 GN=ZNF330 PE=1 SV=1
TRINITY_DN117901_c0_g1_i1	0	0	0	0	0	0	0	0	0	0	0	0	0	0	2	0	0	0	0	0	0	0	0	0	0	0	0	0	0	0	0		ZN330	DROMEZinc finger protein 330 homolog OS=Drosophila melanogaster OX=7227 GN=Noa36 PE=2 SV=1
TRINITY_DN85666_c0_g1_i1	0	0	0	0	0	0	0	0	0	0	0	0	0	0	3	0	0	0	0	0	0	0	0	0	0	0	0	0	0	0	0		ZN277	HUMANZinc finger protein 277 OS=Homo sapiens OX=9606 GN=ZNF277 PE=1 SV=2
TRINITY_DN8294_c0_g1_i1	19	12	15	15	8	10	14	16	12	16	14	19	41	25	1	15	7	1	14	14	8	13	16	13	13	8	12	13	15	3	5		ZN277	HUMANZinc finger protein 277 OS=Homo sapiens OX=9606 GN=ZNF277 PE=1 SV=2
TRINITY_DN103052_c0_g1_i1	0	0	0	0	0	0	0	0	0	0	0	0	0	0	2	0	0	0	0	0	0	0	0	0	0	0	0	0	0	0	0		ZN277	HUMANZinc finger protein 277 OS=Homo sapiens OX=9606 GN=ZNF277 PE=1 SV=2
TRINITY_DN6790_c0_g2_i3	0	1	0	4	0	3	1.23	0	0	0	3	0	0	2	0	0	0	0	0	0	0	0	0	7	0	3.55	0	0	2	0	0		ZN232	HUMANZinc finger protein 232 OS=Homo sapiens OX=9606 GN=ZNF232 PE=1 SV=1
TRINITY_DN2224_c1_g1_i13	0	2.79	2.58	2.68	5.51	0	2.99	0	2.45	0	0	0	0	0	0	0	0	0	3	2.7	5.22	0	3.09	5.88	0	0	3.16	0	0	3.51	2.58		ZN207	XENLABUB3-interacting and GLEBS motif-containing protein ZNF207 OS=Xenopus laevis OX=8355 GN=znf207 PE=1 SV=1
TRINITY_DN2224_c1_g1_i17	2.28	11.37	7.94	25.86	6.79	8.57	0	2.53	0	13.67	13.27	11.74	16.62	18.48	0	11.92	7.1	0	14.23	5.23	10.01	4.47	15.42	21.69	10.9	12.84	10.01	21.3	18.29	13.6	30		ZN207	XENLABUB3-interacting and GLEBS motif-containing protein ZNF207 OS=Xenopus laevis OX=8355 GN=znf207 PE=1 SV=1
TRINITY_DN2224_c1_g1_i5	4.46	1.92	0	0	0	22.71	5.99	1.96	0	0	0	0	12.49	0	0	13.57	0	0	0	13.44	0	0	0	0	14.73	0.17	0	0	4.38	0	0		ZN207	XENLABUB3-interacting and GLEBS motif-containing protein ZNF207 OS=Xenopus laevis OX=8355 GN=znf207 PE=1 SV=1
TRINITY_DN27911_c0_g1_i1	0	0	0	0	0	0	0	0	0	0	0	0	0	0	10.89	0	0	0	0	0	0	0	0	0	0	0	0	0	0	0	0		ZN207	XENLABUB3-interacting and GLEBS motif-containing protein ZNF207 OS=Xenopus laevis OX=8355 GN=znf207 PE=1 SV=1
TRINITY_DN2224_c1_g1_i23	48.04	42.74	55.58	58.22	52.85	61.53	36.87	21.12	54.36	30.33	30.07	32.56	116.77	75.05	3.77	65.74	38.86	10.05	85.57	49.82	32.84	66.16	56.57	45.26	26.41	53.36	36.6	32.85	28.11	2.57	17.29		ZN207	XENLABUB3-interacting and GLEBS motif-containing protein ZNF207 OS=Xenopus laevis OX=8355 GN=znf207 PE=1 SV=1
TRINITY_DN2224_c1_g1_i30	0	6.98	8.12	9.55	20.43	0	11.71	0	10.82	0	0	0	0	0	0	0	0.38	0	0	0	0	5.11	0	8.53	0	14.67	20.23	0	0	0	13.43		ZN207	XENLABUB3-interacting and GLEBS motif-containing protein ZNF207 OS=Xenopus laevis OX=8355 GN=znf207 PE=1 SV=1
TRINITY_DN27911_c0_g1_i2	0	0	0	0	0	0	0	0	0	0	0	0	0	0	38.11	0	0	0	0	0	0	0	0	0	0	0	0	0	0	0	0		ZN207	XENLABUB3-interacting and GLEBS motif-containing protein ZNF207 OS=Xenopus laevis OX=8355 GN=znf207 PE=1 SV=1
TRINITY_DN2224_c1_g1_i4	0	0	0	0	0	0	0	13.04	0	0	0	0	0	13.81	0	0	0	0	0	0	0	0	0	0	0	0	0	0	0	0	0		ZN207	XENLABUB3-interacting and GLEBS motif-containing protein ZNF207 OS=Xenopus laevis OX=8355 GN=znf207 PE=1 SV=1
TRINITY_DN2224_c1_g1_i26	0	0	0	0	2.59	0	0.36	1.35	0	0	0	0	1.88	2.66	0	0	0	1	2.58	0	0	5.03	1.88	0	0	6.76	0	0	5.02	0	0		ZN207	XENLABUB3-interacting and GLEBS motif-containing protein ZNF207 OS=Xenopus laevis OX=8355 GN=znf207 PE=1 SV=1
TRINITY_DN2224_c1_g1_i12	4.78	10.19	3.89	0	2.65	0	7.25	0	0	0	0	0	11.05	0	0	0	0	0	0	0.8	0	0	6.05	3.64	0	4.59	0	0	8.51	12.32	3.75		ZN207	XENLABUB3-interacting and GLEBS motif-containing protein ZNF207 OS=Xenopus laevis OX=8355 GN=znf207 PE=1 SV=1
TRINITY_DN10064_c4_g1_i3	0	0	2	0	0	0	2.42	1	0	4	0	0	3.95	1.86	0	0	0	0	1.88	1.9	4	1.89	5.75	0	1	1	0	0	3.06	0	0		ZMYM4	HUMANZinc finger MYM-type protein 4 OS=Homo sapiens OX=9606 GN=ZMYM4 PE=1 SV=1
TRINITY_DN5792_c0_g1_i5	0	0	0	0	0	0	0	0	1.77	0	0	1.72	3.77	0	0	0	0	0	0	2.84	0	0	0	1.34	1.32	0	0	0	0	0	0		ZMYM3	MOUSEZinc finger MYM-type protein 3 OS=Mus musculus OX=10090 GN=Zmym3 PE=1 SV=1
TRINITY_DN5792_c0_g1_i2	0	0	0	0	0	0	0	1.95	0	0	0	0	6.07	0	0	6.16	3.1	0	1	19.27	9.84	0	0	2.53	8.58	0	3	43.48	0	0	3.48		ZMYM3	MOUSEZinc finger MYM-type protein 3 OS=Mus musculus OX=10090 GN=Zmym3 PE=1 SV=1
TRINITY_DN5792_c0_g1_i14	2	0	1.47	3.66	1.53	0	7.27	5.6	0	2.35	0	2.28	0	2.5	0	0	3.08	1.32	0	3.73	4.34	13.77	0	0	0	5.84	2	0	0	0	0		ZMYM3	MOUSEZinc finger MYM-type protein 3 OS=Mus musculus OX=10090 GN=Zmym3 PE=1 SV=1
TRINITY_DN5792_c0_g1_i3	0	0	0	0	0	0	0	0	13.72	0	10.36	3.87	5.03	0	0	0	0	0	0	0	7.9	0	2	0	0	1.48	0	0	13.41	4.11	0		ZMYM3	MOUSEZinc finger MYM-type protein 3 OS=Mus musculus OX=10090 GN=Zmym3 PE=1 SV=1
TRINITY_DN5792_c0_g1_i11	0	6.73	0	0	0	0	0	0	0	13.35	0	0	24.01	2.9	0	7.72	0	0	0	0	0.78	3.14	0	0	8.18	1.68	0	0	0	0	0		ZMYM3	MOUSEZinc finger MYM-type protein 3 OS=Mus musculus OX=10090 GN=Zmym3 PE=1 SV=1
TRINITY_DN5792_c0_g1_i7	3	2.52	15.71	4.26	0	0	7.35	0	0	0	11.88	0.13	0	6.6	0	0	0	0	0	0	0	0	0	0	0	0	0	0	0	0	0		ZMYM3	MOUSEZinc finger MYM-type protein 3 OS=Mus musculus OX=10090 GN=Zmym3 PE=1 SV=1
TRINITY_DN5792_c0_g1_i10	0	0	0	0	13.25	0	4.72	0.46	5.5	0	0	0	0	0	0	4.19	0.82	0	0	3.16	10.14	0	0	1.27	0	0	0	0	0	2.38	0.52		ZMYM3	MOUSEZinc finger MYM-type protein 3 OS=Mus musculus OX=10090 GN=Zmym3 PE=1 SV=1
TRINITY_DN5792_c0_g1_i13	0	0	9.82	0.08	0	0	0	0	0	0	0	0	6.13	0	0	9.05	1	0	1	0	0	0	0	0	9.73	0	0	29.52	0	1	1		ZMYM3	HUMANZinc finger MYM-type protein 3 OS=Homo sapiens OX=9606 GN=ZMYM3 PE=1 SV=2
TRINITY_DN20796_c0_g1_i1	1	1	0	0	0	1	0	0	0	0	0	1	6	5	0	1	0	0	0	2	1	3	3	1	0	1	0	1	0	0	1		ZMYM3	HUMANZinc finger MYM-type protein 3 OS=Homo sapiens OX=9606 GN=ZMYM3 PE=1 SV=2
TRINITY_DN517_c3_g1_i5	7	0	0	0	0	0	0	0	0	0	0	0	0	0	0	0	0	5	0	0	0	0	0	0	0	0	7.03	0	0	0	0		ZMYM2	MOUSEZinc finger MYM-type protein 2 OS=Mus musculus OX=10090 GN=Zmym2 PE=1 SV=3
TRINITY_DN123691_c0_g1_i1	0	0	0	0	0	0	0	0	0	0	0	0	0	0	10	0	0	0	0	0	0	0	0	0	0	0	0	0	0	0	0		ZMYM2	MOUSEZinc finger MYM-type protein 2 OS=Mus musculus OX=10090 GN=Zmym2 PE=1 SV=3
TRINITY_DN11310_c0_g1_i3	1	2	4	0	2	2	2	1	0	1	6	0	1	1	0	3	0	1	1	3	5	1	1	2	0	1	0	0	0	2	5		ZMYM2	MOUSEZinc finger MYM-type protein 2 OS=Mus musculus OX=10090 GN=Zmym2 PE=1 SV=3
TRINITY_DN13873_c0_g1_i20	0	2.14	0	0	0	2.26	0	0	0	0	0	0	0.99	0	0	0	0	0	0	2.34	0	0	0	0	0	2.49	0	0	0	0	0		ZMYM2	MOUSEZinc finger MYM-type protein 2 OS=Mus musculus OX=10090 GN=Zmym2 PE=1 SV=3
TRINITY_DN18161_c0_g1_i8	0	0	8.61	0	0	0	0	7.63	0	0	0	0	0	4.38	0	4.35	0	0	0	0	0	0	5.86	11.3	0	0	0	0	0	0	0		ZMYM2	MOUSEZinc finger MYM-type protein 2 OS=Mus musculus OX=10090 GN=Zmym2 PE=1 SV=3
TRINITY_DN18161_c0_g1_i9	0	0	0	0	0	0	0	0	0	0	0	0	0	0	0	0	0	0	0	0	0	0	0	0	0	0	0	0	0	0	0		ZMYM2	MOUSEZinc finger MYM-type protein 2 OS=Mus musculus OX=10090 GN=Zmym2 PE=1 SV=3
TRINITY_DN18161_c0_g1_i14	0	0	0	0	0	0	0	0	0	0	0	1	0	0	0	3.89	0	0	2.76	6.29	0	0	0	0	0	1.32	0	0	0	0	0		ZMYM2	MOUSEZinc finger MYM-type protein 2 OS=Mus musculus OX=10090 GN=Zmym2 PE=1 SV=3
TRINITY_DN517_c3_g1_i16	0	0	9.34	14.32	0	9.15	6.35	26.03	19	4.11	5.05	3.76	6.64	17.65	1	10.03	0	0	0	0	2.69	11.04	0	37.95	0	0	0	0	9.76	0	10.24		ZMYM2	MOUSEZinc finger MYM-type protein 2 OS=Mus musculus OX=10090 GN=Zmym2 PE=1 SV=3
TRINITY_DN18161_c0_g1_i3	3.59	0.03	0	1.11	0	4.12	2.7	4.85	0	0	1.71	0	0	0	0	0	0	0	0.11	8.01	0	0.31	0	0	1	0	1	0	0	0	0.77		ZMYM2	MOUSEZinc finger MYM-type protein 2 OS=Mus musculus OX=10090 GN=Zmym2 PE=1 SV=3
TRINITY_DN18161_c0_g1_i13	0	0	6.39	0	0	3.23	0	10.52	3.92	0	0	0	0	8.62	0	2.75	0	1	8.13	2.7	6	0	4.14	19.7	0	0.25	0	8.7	4.39	0	2.23		ZMYM2	MOUSEZinc finger MYM-type protein 2 OS=Mus musculus OX=10090 GN=Zmym2 PE=1 SV=3
TRINITY_DN517_c3_g1_i18	0	23.52	26.82	14.28	9	18.06	13.27	5.98	10.72	6.45	15.56	11.24	35.37	42.17	0	16.69	12	0	35	28.21	11.31	17.49	25.44	12.87	10.76	19	30.97	38.42	39.91	8.99	8.43		ZMYM2	MOUSEZinc finger MYM-type protein 2 OS=Mus musculus OX=10090 GN=Zmym2 PE=1 SV=3
TRINITY_DN18161_c0_g1_i4	2.41	6.97	0	6.89	5	10.65	2.3	0	4.08	1	2.29	0	9	0	0	0	2	0	0	0	0	4.69	0	0	0	2.44	0	6.3	4.61	0	0		ZMYM2	MOUSEZinc finger MYM-type protein 2 OS=Mus musculus OX=10090 GN=Zmym2 PE=1 SV=3
TRINITY_DN19417_c0_g1_i8	0	1	1	0	1	0	1	0	0	0	0	1	0	0	0	2	1	0	1	2	0	0	1	1.13	0	1	4.39	1	0	0	0		ZMYM2	HUMANZinc finger MYM-type protein 2 OS=Homo sapiens OX=9606 GN=ZMYM2 PE=1 SV=1
TRINITY_DN205_c19_g1_i1	0	0	0	0	0	0	0	0	0	0	0	0	0	35.39	0	0	0	0	0	0	0	0	0	0	0	0	0	0	0	0	0		ZMYM2	HUMANZinc finger MYM-type protein 2 OS=Homo sapiens OX=9606 GN=ZMYM2 PE=1 SV=1
TRINITY_DN13873_c0_g1_i16	0	4.86	2	0	0	0	0	0	0	0	0	1.6	0	0	0	3	0	0	0	1.66	0	5	1.71	0	0	0	0	0	0	0	0		ZMYM2	HUMANZinc finger MYM-type protein 2 OS=Homo sapiens OX=9606 GN=ZMYM2 PE=1 SV=1
TRINITY_DN785_c0_g1_i1	0	0	0	0	0	0	0	0	0	2.7	1.76	1.86	0	5.28	0	1.9	0	1	0	0	0	4.42	4.46	0	0	1.98	2.87	2.92	0	0	0		ZMYM2	HUMANZinc finger MYM-type protein 2 OS=Homo sapiens OX=9606 GN=ZMYM2 PE=1 SV=1
TRINITY_DN20507_c0_g1_i10	1	0	0	3.78	0	1.86	2	1	3	0	0	0	0	3	1	0	0	1	0	0	0	0	0	0	0	0	0	0	0	0	0		ZMYM2	HUMANZinc finger MYM-type protein 2 OS=Homo sapiens OX=9606 GN=ZMYM2 PE=1 SV=1
TRINITY_DN785_c0_g1_i7	14.65	28.94	31.42	13.04	19.57	12.55	19.14	9.15	13.51	12.96	18	0	33.26	29.37	0	16.79	9.54	0	16.43	29.74	15.54	14.7	18.18	19	18	13.9	14.45	14.19	34.83	1.44	3.21		ZMYM2	HUMANZinc finger MYM-type protein 2 OS=Homo sapiens OX=9606 GN=ZMYM2 PE=1 SV=1
TRINITY_DN205_c19_g1_i8	0	0	0	0	6.21	0	0	0	0	0	0	4.97	0	5.93	0	0	0	0	0	0	0	0	0	0	3.12	0	0	0	0	0	0		ZMYM2	HUMANZinc finger MYM-type protein 2 OS=Homo sapiens OX=9606 GN=ZMYM2 PE=1 SV=1
TRINITY_DN205_c19_g1_i2	0	0.81	0	6.81	0	0	0	1.58	0	0.77	0	3.38	31.39	1.33	0	0	0	0	0.81	0	0	9.44	0	0.8	0	2.97	3.68	0.77	4.75	3.12	0		ZMYM2	HUMANZinc finger MYM-type protein 2 OS=Homo sapiens OX=9606 GN=ZMYM2 PE=1 SV=1
TRINITY_DN20507_c0_g1_i19	0	3.97	4.29	0	10	2.64	0	0	0	0	0	0	13	0	0	10	0	0	9.17	4	0	10	8	10.05	5	12.52	0	0	6	0	0		ZMYM2	HUMANZinc finger MYM-type protein 2 OS=Homo sapiens OX=9606 GN=ZMYM2 PE=1 SV=1
TRINITY_DN13873_c0_g1_i29	0	0	0	3	1	1	0	0	1	0	1	0	3.01	0	0	0	0	0	1	0	1	0	0	2	2	1	1	0	0	1	0		ZMYM2	HUMANZinc finger MYM-type protein 2 OS=Homo sapiens OX=9606 GN=ZMYM2 PE=1 SV=1
TRINITY_DN19417_c0_g1_i4	3	0	0	0	1	0	0	3	1.3	0	0	0	0	3	0	0	0	0	0	0	0	4	0	1	0	0	1.61	0	0	0	0		ZMYM2	HUMANZinc finger MYM-type protein 2 OS=Homo sapiens OX=9606 GN=ZMYM2 PE=1 SV=1
TRINITY_DN81387_c0_g1_i1	1	1	4	2	0	2	4	1	4	0	2	0	0	3	0	2	0	0	0	0	0	5	0	0	0	0	8	1	13	15	21		ZMYM2	HUMANZinc finger MYM-type protein 2 OS=Homo sapiens OX=9606 GN=ZMYM2 PE=1 SV=1
TRINITY_DN785_c0_g1_i18	0	0	0	0	0	0	0	0	0	0	0	15.51	9.98	17.55	0	0	2.02	0	0	0	4.39	0	6.51	0	0	0	0	0	0	1.19	0		ZMYM2	HUMANZinc finger MYM-type protein 2 OS=Homo sapiens OX=9606 GN=ZMYM2 PE=1 SV=1
TRINITY_DN205_c19_g1_i10	0	0.81	0	0	0	0	0	0	0	0.77	0	0	0	8.28	0	0	0	0	0.81	0	0	0	0	0.8	0	0	7.36	0.77	0	3.12	0		ZMYM2	HUMANZinc finger MYM-type protein 2 OS=Homo sapiens OX=9606 GN=ZMYM2 PE=1 SV=1
TRINITY_DN10332_c0_g1_i4	0	0	0	0	0	1	0	6	0	0	0	5	0	0	0	0	0	1	7	0	5.18	1	4	0	0	0	0	0	0	2.45	5		ZMYM1	HUMANZinc finger MYM-type protein 1 OS=Homo sapiens OX=9606 GN=ZMYM1 PE=1 SV=1
TRINITY_DN105814_c0_g1_i1	0	3	0	0	0	0	1	2	0	0	0	0	0	1	0	3	2	1	0	2	0	0	17	0	0	0	0	0	1	0	1		ZMYM1	HUMANZinc finger MYM-type protein 1 OS=Homo sapiens OX=9606 GN=ZMYM1 PE=1 SV=1
TRINITY_DN18075_c3_g1_i1	0	0	0	0	1	0	1	0	1	0	0	0	1	1	0	0	0	0	1	0	1	0	0	0	0	1	0	0	0	0	0		ZMYM1	HUMANZinc finger MYM-type protein 1 OS=Homo sapiens OX=9606 GN=ZMYM1 PE=1 SV=1
TRINITY_DN127833_c0_g1_i1	0	0	1	0	0	0	0	0	0	0	0	0	0	0	0	0	0	0	1	0	0	0	0	0	0	0	0	0	0	0	0		ZMYM1	HUMANZinc finger MYM-type protein 1 OS=Homo sapiens OX=9606 GN=ZMYM1 PE=1 SV=1
TRINITY_DN105814_c0_g1_i2	0	0	0	0	0	0	0	0	0	0	0	0	0	0	0	0	0	0	0	0	0	0	0	0	0	0	0	0	0	0	0		ZMYM1	HUMANZinc finger MYM-type protein 1 OS=Homo sapiens OX=9606 GN=ZMYM1 PE=1 SV=1
TRINITY_DN8644_c1_g1_i4	0	0	5	3	0	2	0	6	12	0	6	11.76	0	3	0	0	2	0	0	0	3.52	0	8	0	0	0	3	5	0	0	8		ZMYM1	HUMANZinc finger MYM-type protein 1 OS=Homo sapiens OX=9606 GN=ZMYM1 PE=1 SV=1
TRINITY_DN73165_c0_g1_i1	0	0	0	0	0	0	0	0	0	0	0	0	0	0	5	0	0	0	0	0	0	0	0	0	0	0	0	0	0	0	0		ZMYM1	HUMANZinc finger MYM-type protein 1 OS=Homo sapiens OX=9606 GN=ZMYM1 PE=1 SV=1
TRINITY_DN70815_c0_g1_i1	1	0	0	0	1	0	0	0	1	0	0	0	3	0	0	0	0	0	0	0	0	0	0	1	0	0	0	0	0	0	0		ZMYM1	HUMANZinc finger MYM-type protein 1 OS=Homo sapiens OX=9606 GN=ZMYM1 PE=1 SV=1
TRINITY_DN8644_c1_g1_i1	4.76	26	0	0	3.44	0	6.01	0	0	2.4	0	7.24	23.89	0	0	3.53	0	0	12	10.24	6.64	8.05	0	4.67	0	7	0	0	7.27	3.57	0		ZMYM1	HUMANZinc finger MYM-type protein 1 OS=Homo sapiens OX=9606 GN=ZMYM1 PE=1 SV=1
TRINITY_DN3867_c0_g2_i1	1	1	1	1	1	3	1	4	0	0	0	0	1	3	0	1	0	1	8	0	0	2	1	2	1	2	3	2	2	2	3		ZMYM1	HUMANZinc finger MYM-type protein 1 OS=Homo sapiens OX=9606 GN=ZMYM1 PE=1 SV=1
TRINITY_DN10332_c0_g1_i6	1	0	3	1	1	0	1.21	0	3.73	2	0	0	9	4	1	1	0	0	0	1	1.82	0	0	0	1	2	5	1	2	0	0		ZMYM1	HUMANZinc finger MYM-type protein 1 OS=Homo sapiens OX=9606 GN=ZMYM1 PE=1 SV=1
TRINITY_DN3167_c0_g1_i22	0	0	0	0	1	0	0	0	0	0	0	2.45	4.33	5.91	0	0	0	1.66	1	0	4.18	7.88	0	0	1.03	0	0	2.96	0	2.93	8.98		ZMY12	HUMANZinc finger MYND domain-containing protein 12 OS=Homo sapiens OX=9606 GN=ZMYND12 PE=2 SV=3
TRINITY_DN3167_c0_g1_i29	10.63	10.58	15.95	10.63	6.3	13.7	26.36	15.85	31.12	5.3	21.09	60.95	92.35	243.74	4.71	55.96	21.41	8.28	36.02	51.19	95.89	82.77	96.65	40.95	47.1	28.25	31.75	38.35	25.89	69.14	88.6		ZMY12	HUMANZinc finger MYND domain-containing protein 12 OS=Homo sapiens OX=9606 GN=ZMYND12 PE=2 SV=3
TRINITY_DN105838_c0_g1_i1	0	0	0	0	0	0	0	0	0	0	0	0	0	0	2	0	0	0	0	0	0	0	0	0	0	0	0	0	0	0	0		ZMY12	HUMANZinc finger MYND domain-containing protein 12 OS=Homo sapiens OX=9606 GN=ZMYND12 PE=2 SV=3
TRINITY_DN87803_c0_g1_i1	0	0	0	0	0	0	0	0	0	0	0	0	0	0	4	0	0	0	0	0	0	0	0	0	0	0	0	0	0	0	0		ZMY10	XENLAZinc finger MYND domain-containing protein 10 OS=Xenopus laevis OX=8355 GN=zmynd10 PE=2 SV=1
TRINITY_DN100916_c0_g1_i1	0	0	0	0	0	0	0	0	0	0	0	0	0	0	6	0	0	0	0	0	0	0	0	0	0	0	0	0	0	0	0		ZMY10	XENLAZinc finger MYND domain-containing protein 10 OS=Xenopus laevis OX=8355 GN=zmynd10 PE=2 SV=1
TRINITY_DN120247_c0_g1_i1	0	0	0	0	0	0	0	0	0	0	0	0	0	0	4	0	0	0	0	0	0	0	0	0	0	0	0	0	0	0	0		ZMY10	XENLAZinc finger MYND domain-containing protein 10 OS=Xenopus laevis OX=8355 GN=zmynd10 PE=2 SV=1
TRINITY_DN43094_c0_g1_i2	56	70	87	99	44	54	63	51	46	48	57	39	115	66	2	32	23	10	52	38	26	54	41	60	46	66	75	72	49	38	53		ZMY10	RATZinc finger MYND domain-containing protein 10 OS=Rattus norvegicus OX=10116 GN=Zmynd10 PE=2 SV=1
TRINITY_DN34469_c0_g1_i1	0	0	0	0	0	0	0	0	0	0	0	0	0	0	35	0	0	0	0	0	0	0	0	0	0	0	0	0	0	0	0		ZMY10	DANREZinc finger MYND domain-containing protein 10 OS=Danio rerio OX=7955 GN=zmynd10 PE=2 SV=1
TRINITY_DN41_c2_g1_i11	56.08	41.11	27.49	52.67	40.14	50.73	11.09	14.49	21.62	9.3	14.87	3.93	33.29	35.35	0	47.88	6.59	0	27.62	29.98	0	31.23	34.53	40.69	29.19	96.53	29.22	27.88	5.81	11.15	16.76		ZMIZ1	HUMANZinc finger MIZ domain-containing protein 1 OS=Homo sapiens OX=9606 GN=ZMIZ1 PE=1 SV=3
TRINITY_DN41_c2_g1_i13	48.54	18.5	97.71	24.32	50.42	27.15	36.17	0	28.54	17.64	49.44	5.88	75.45	17.09	0	6.7	29.37	0	60.94	0	6.09	14.75	42.48	52.79	26.74	52.88	38.72	47.04	75.82	0	18.74		ZMIZ1	HUMANZinc finger MIZ domain-containing protein 1 OS=Homo sapiens OX=9606 GN=ZMIZ1 PE=1 SV=3
TRINITY_DN41_c2_g1_i10	0	13.89	24.02	0	10.9	0	7.81	6.99	1.41	21.26	10	7.66	25.29	1.53	0	0	2.85	0	2.8	0	7.12	2.34	6.12	18.32	3.78	0	7.15	1.91	4.51	6.18	3.58		ZMIZ1	HUMANZinc finger MIZ domain-containing protein 1 OS=Homo sapiens OX=9606 GN=ZMIZ1 PE=1 SV=3
TRINITY_DN44411_c0_g1_i1	0	0	0	0	0	0	0	0	0	0	0	0	0	0	23	0	0	0	0	0	0	0	0	0	0	0	0	0	0	0	0		ZMIZ1	HUMANZinc finger MIZ domain-containing protein 1 OS=Homo sapiens OX=9606 GN=ZMIZ1 PE=1 SV=3
TRINITY_DN41_c2_g1_i1	0	0	31.41	0	81.52	0	0	0	0	13.54	2.43	0	114.41	0	0	0	30.69	0	13.02	0	43.81	124.65	60.07	35.23	64.84	0	32.93	0	0	3.75	0		ZMIZ1	HUMANZinc finger MIZ domain-containing protein 1 OS=Homo sapiens OX=9606 GN=ZMIZ1 PE=1 SV=3
TRINITY_DN41_c2_g1_i7	132.04	115.21	187.2	211.8	126.59	275.2	117.27	102.34	106.04	36.26	78.51	73.82	172.83	232.13	14.01	363.16	77.96	44.16	327.81	263.64	99.58	245.32	246.38	136.17	170.7	269.44	127.76	185.86	282.08	13.58	105.52		ZMIZ1	HUMANZinc finger MIZ domain-containing protein 1 OS=Homo sapiens OX=9606 GN=ZMIZ1 PE=1 SV=3
TRINITY_DN39029_c0_g2_i1	0	0	0	0	0	0	0	0	0	0	0	0	0	0	23	0	0	0	0	0	0	0	0	0	0	0	0	0	0	0	0		ZMIZ1	HUMANZinc finger MIZ domain-containing protein 1 OS=Homo sapiens OX=9606 GN=ZMIZ1 PE=1 SV=3
TRINITY_DN41_c2_g1_i6	0	13.27	2.85	11.92	3.12	11.53	6.94	0	11.59	0	0	17.09	0	0	0	16.2	7.93	0	4.51	5.77	3.84	0	0	0	2.93	20.1	11	4.82	4.42	9.91	0		ZMIZ1	HUMANZinc finger MIZ domain-containing protein 1 OS=Homo sapiens OX=9606 GN=ZMIZ1 PE=1 SV=3
TRINITY_DN17554_c0_g1_i8	2.46	2.77	3	0.09	3.67	1.73	4.45	0	0	1	1.8	0	9.76	0.78	0.99	0	0	0	1.72	0	1.47	3	2.75	0.7	5	3	2	1.5	3.81	4	3.41		ZMIZ1	HUMANZinc finger MIZ domain-containing protein 1 OS=Homo sapiens OX=9606 GN=ZMIZ1 PE=1 SV=3
TRINITY_DN113449_c0_g1_i1	0	0	0	0	0	0	0	0	0	0	0	0	0	0	11	0	0	0	0	0	0	0	0	0	0	0	0	0	0	0	0		ZMIZ1	HUMANZinc finger MIZ domain-containing protein 1 OS=Homo sapiens OX=9606 GN=ZMIZ1 PE=1 SV=3
TRINITY_DN41_c2_g1_i14	17.38	14.02	32.33	50.3	64.31	29.39	30.71	13.18	12.8	0	7.76	4.62	55.75	33.89	0	37.06	12.61	3.84	32.3	23.61	22.63	36.71	32.47	69.8	48.83	30.05	28.21	49.48	20.35	5.43	7.4		ZMIZ1	HUMANZinc finger MIZ domain-containing protein 1 OS=Homo sapiens OX=9606 GN=ZMIZ1 PE=1 SV=3
TRINITY_DN20282_c0_g1_i2	0	0	0	0	0	0	0	0	0	0	0	0	1.41	0	0	0	1.54	0	0	0	0	0	0	0	0	2	0	1.86	0	0	0		ZMAT5	BOVINZinc finger matrin-type protein 5 OS=Bos taurus OX=9913 GN=ZMAT5 PE=2 SV=1
TRINITY_DN20282_c0_g1_i1	1	2	4	2	1	5	1	2	1	1	6	3	10.59	16	0	1	2.46	1	3	3	2	4	3	2	3	1	2	2.14	6	1	0		ZMAT5	BOVINZinc finger matrin-type protein 5 OS=Bos taurus OX=9913 GN=ZMAT5 PE=2 SV=1
TRINITY_DN6910_c0_g1_i1	9	0	6.38	2.56	0	0	2	0	0	0	2	1	3.44	0	0	8.86	0	0	5	6	2	0.46	2	6	1	0.98	3	2.72	0	1	0		ZMAT2	HUMANZinc finger matrin-type protein 2 OS=Homo sapiens OX=9606 GN=ZMAT2 PE=1 SV=1
TRINITY_DN6910_c0_g1_i2	0	0	2.62	5.44	4	4	0	0	2	2	0	0	3.56	5	0	3.14	5	2	0	0	0	3.54	0	0	0	3.02	0	4.28	2	0	0		ZMAT2	HUMANZinc finger matrin-type protein 2 OS=Homo sapiens OX=9606 GN=ZMAT2 PE=1 SV=1
TRINITY_DN18065_c0_g1_i2	0	0	0	0	1	0	0	0	0	0	0	0	2	2	0	0	0	0	0	0	0	0	0	0	0	0	1	0	0	0	0		ZKSC2	HUMANZinc finger protein with KRAB and SCAN domains 2 OS=Homo sapiens OX=9606 GN=ZKSCAN2 PE=1 SV=2
TRINITY_DN18065_c0_g1_i3	0	0	0	1	0	0	0	0	1	1	0	0	0	0	0	0	0	0	0	0	0	0	0	0	0	1	0	0	0	0	0		ZKSC2	HUMANZinc finger protein with KRAB and SCAN domains 2 OS=Homo sapiens OX=9606 GN=ZKSCAN2 PE=1 SV=2
TRINITY_DN16229_c0_g1_i8	0	0	2	0	0	0	0	0	0	0	0	0	0	0	0	0	0	0	0	0	0	0	0	0	0	1	0	1	0	0	0		ZIG2	CAEELZwei Ig domain protein zig-2 OS=Caenorhabditis elegans OX=6239 GN=zig-2 PE=2 SV=1
TRINITY_DN3245_c0_g1_i28	0	0	0	2	0	0	1	0	0	2	0	2	0	3	0	1	1	0	2.6	0	4	1	2	0	4	2	2	1	0	0	0		ZIFL1	ARATHProtein ZINC INDUCED FACILITATOR-LIKE 1 OS=Arabidopsis thaliana OX=3702 GN=ZIFL1 PE=2 SV=1
TRINITY_DN3245_c0_g1_i22	0	0	0	0	0	0	0	0	0	0	0	4.01	9.88	6.56	0	0	0	0	5.79	5.8	1.53	1.68	4.14	3.67	2.57	0	3.91	3.28	0	3.4	0		ZIFL1	ARATHProtein ZINC INDUCED FACILITATOR-LIKE 1 OS=Arabidopsis thaliana OX=3702 GN=ZIFL1 PE=2 SV=1
TRINITY_DN13647_c0_g1_i30	0	0	0	1.05	1.52	1.57	0	0	1	0.58	0	0	2.25	3.66	0	1.84	1.77	0	1.17	0	2.11	2.62	0	0	0	1.53	0	0	2.46	0	1.03		ZIFL1	ARATHProtein ZINC INDUCED FACILITATOR-LIKE 1 OS=Arabidopsis thaliana OX=3702 GN=ZIFL1 PE=2 SV=1
TRINITY_DN3245_c0_g1_i6	0	1.16	0	4.69	2.71	0	1.25	5.13	2.84	0	0	0	0.46	0	0	2.93	0	2.74	0	0	0	5.28	0	2.38	0	0	0	0.36	0	0	11.97		ZIFL1	ARATHProtein ZINC INDUCED FACILITATOR-LIKE 1 OS=Arabidopsis thaliana OX=3702 GN=ZIFL1 PE=2 SV=1
TRINITY_DN3245_c0_g1_i10	0	0	1.43	0	0	0	0	0	0	0	0	0	1.22	0	0	0	0	0	0.64	1.2	0	1	0	0	0	0	0	0	0	1.95	3		ZIFL1	ARATHProtein ZINC INDUCED FACILITATOR-LIKE 1 OS=Arabidopsis thaliana OX=3702 GN=ZIFL1 PE=2 SV=1
TRINITY_DN13647_c0_g1_i3	0	0	0	1	0	0	0	0	1	0	0	0	0	0	0	0	0.91	0	0	0	0	0.92	0	0	0.49	0	0	0	0	0	0		ZIFL1	ARATHProtein ZINC INDUCED FACILITATOR-LIKE 1 OS=Arabidopsis thaliana OX=3702 GN=ZIFL1 PE=2 SV=1
TRINITY_DN13647_c0_g1_i7	0	0	9.49	1.78	0	12.17	0	11.99	0	7	0	0	10.31	8.63	0	13	0	1.44	0	11.62	0	0	3.67	4.53	8.86	6.68	0	0	4.48	0	6.25		ZIFL1	ARATHProtein ZINC INDUCED FACILITATOR-LIKE 1 OS=Arabidopsis thaliana OX=3702 GN=ZIFL1 PE=2 SV=1
TRINITY_DN3245_c0_g1_i35	0	2	0	1	0	1	0	0	0	0	1	0	0	4	0	1	0	0	1	2	1	2	0	1	2	1	0	0	0	3	1.46		ZIFL1	ARATHProtein ZINC INDUCED FACILITATOR-LIKE 1 OS=Arabidopsis thaliana OX=3702 GN=ZIFL1 PE=2 SV=1
TRINITY_DN13647_c0_g1_i11	0	0	0	0	0	0	0	3.42	0	0	0	0	0	0	0	0	0	0	0	0	0	0	0	0	0	0	0	0	0	0	0		ZIFL1	ARATHProtein ZINC INDUCED FACILITATOR-LIKE 1 OS=Arabidopsis thaliana OX=3702 GN=ZIFL1 PE=2 SV=1
TRINITY_DN3245_c0_g1_i31	1.4	3.9	3.38	3.56	1.35	4.48	0	0	4.63	5.64	8.18	0	18.12	2.6	0	4.36	0	0	7.08	8.87	1.23	0	0	10.25	7.09	5.97	1.77	7.71	0	0.17	1.32		ZIFL1	ARATHProtein ZINC INDUCED FACILITATOR-LIKE 1 OS=Arabidopsis thaliana OX=3702 GN=ZIFL1 PE=2 SV=1
TRINITY_DN3245_c0_g1_i36	0	0	0	1.12	0	11.06	2.52	3.21	1.59	0	0	2.91	0	2.85	0	0	0	0	0.17	0	0	0	0.47	0	0	0	0	0	0	0	0		ZIFL1	ARATHProtein ZINC INDUCED FACILITATOR-LIKE 1 OS=Arabidopsis thaliana OX=3702 GN=ZIFL1 PE=2 SV=1
TRINITY_DN1028_c0_g1_i3	4.01	2.99	0	0.93	3.03	2.53	13.48	0	28.82	16.5	0	0	17.34	19.76	0	19.26	10.04	0	31.4	0	4.41	17.88	0	20.57	9.69	7.29	34.53	1.29	25.13	0.35	13.03		ZIFL1	ARATHProtein ZINC INDUCED FACILITATOR-LIKE 1 OS=Arabidopsis thaliana OX=3702 GN=ZIFL1 PE=2 SV=1
TRINITY_DN1028_c0_g1_i9	5.97	1.04	0	18.02	0	0	0	21.34	0	0	10.47	5.16	10.85	6.16	0	12.36	1.49	0	0	13.4	5.49	0	23.99	7.32	11.36	20.13	0	12.2	4.01	0	0		ZIFL1	ARATHProtein ZINC INDUCED FACILITATOR-LIKE 1 OS=Arabidopsis thaliana OX=3702 GN=ZIFL1 PE=2 SV=1
TRINITY_DN1028_c0_g1_i10	5.47	18.3	7.14	0	7.7	3.67	19.53	9.4	3.23	2.39	17.89	14.73	13.53	7.84	0	0	2.24	2	7.78	14.95	8.04	9.11	8.43	22.21	6.11	2.05	17.26	15.82	2.48	5.21	0		ZIFL1	ARATHProtein ZINC INDUCED FACILITATOR-LIKE 1 OS=Arabidopsis thaliana OX=3702 GN=ZIFL1 PE=2 SV=1
TRINITY_DN70702_c0_g1_i1	0	0	0	0	0	0	0	0	0	0	0	0	0	0	2	0	0	0	0	0	0	0	0	0	0	0	0	0	0	0	0		ZIFL1	ARATHProtein ZINC INDUCED FACILITATOR-LIKE 1 OS=Arabidopsis thaliana OX=3702 GN=ZIFL1 PE=2 SV=1
TRINITY_DN1028_c0_g1_i13	3.2	14.73	0	15.5	29.59	0	6.88	4.26	0	11.98	9.07	21.44	8.39	0	1.33	13.09	0	0	0	0	11.98	2.46	41.96	20.03	0	9.42	0	30.44	0	8.68	0		ZIF1	ARATHProtein ZINC INDUCED FACILITATOR 1 OS=Arabidopsis thaliana OX=3702 GN=ZIF1 PE=1 SV=2
TRINITY_DN18872_c0_g1_i3	0	0	1	0	0	0	0	1	0	0	0	0	0	0	0	0	0	0	0	0	0	0	0	0	2	0	0	0	0	0	0		ZIF1	ARATHProtein ZINC INDUCED FACILITATOR 1 OS=Arabidopsis thaliana OX=3702 GN=ZIF1 PE=1 SV=2
TRINITY_DN1028_c0_g1_i11	0	0	0	0	0	0	5.64	4.43	4.69	0	0	0	21.89	0	0	0	0	0	0	17.97	0	0	0	0	7.1	0	0	0	0	0	14.25		ZIF1	ARATHProtein ZINC INDUCED FACILITATOR 1 OS=Arabidopsis thaliana OX=3702 GN=ZIF1 PE=1 SV=2
TRINITY_DN1028_c0_g1_i16	25.53	0	0	57.4	21.69	50.79	0	0	29.72	16.97	11.44	0	32.4	15.53	0	12.91	10.07	0	29.88	8.46	0	0	0	0	0	0	0	13.81	20.74	0	0		ZIF1	ARATHProtein ZINC INDUCED FACILITATOR 1 OS=Arabidopsis thaliana OX=3702 GN=ZIF1 PE=1 SV=2
TRINITY_DN3245_c0_g1_i17	82.21	27.07	0	0	0	0	58.5	27.04	45.99	0	28.09	0	0	43.65	0	15	24	0	0	0	28.11	0	0	0	0	15.89	26.78	0	19.68	0	0		ZIF1	ARATHProtein ZINC INDUCED FACILITATOR 1 OS=Arabidopsis thaliana OX=3702 GN=ZIF1 PE=1 SV=2
TRINITY_DN1028_c0_g1_i18	0	0	0	0	0	0	19.05	0	0	0	0	0	0	0	0	0	4.32	0	12.03	0	0	0	0	0	0	7.45	0	0	0	0	0		ZIF1	ARATHProtein ZINC INDUCED FACILITATOR 1 OS=Arabidopsis thaliana OX=3702 GN=ZIF1 PE=1 SV=2
TRINITY_DN3245_c0_g1_i23	0	0	9.31	11.33	0	0	27.9	0	0	0	0	1.08	31.05	0	2	0	0	0	14.72	9.86	31.75	0	10.39	0	0	92.29	15.94	0	10.85	1.68	7.83		ZIF1	ARATHProtein ZINC INDUCED FACILITATOR 1 OS=Arabidopsis thaliana OX=3702 GN=ZIF1 PE=1 SV=2
TRINITY_DN1028_c0_g1_i7	0	42.43	54.37	0	14.59	0	0	16.68	0	0	18.79	19.08	39.8	14.39	0	0	0	10.44	0	1.94	12.72	40.12	0	15.62	0	20.66	12.27	0	0	0	3.52		ZIF1	ARATHProtein ZINC INDUCED FACILITATOR 1 OS=Arabidopsis thaliana OX=3702 GN=ZIF1 PE=1 SV=2
TRINITY_DN1028_c0_g1_i6	0	0	15.87	9.16	0	0	0	0	0	0.2	0	0	3.97	0	0	0	0	0	0	0	0	6.61	5.77	6.92	7.37	0	0	0	0	4.12	0		ZIF1	ARATHProtein ZINC INDUCED FACILITATOR 1 OS=Arabidopsis thaliana OX=3702 GN=ZIF1 PE=1 SV=2
TRINITY_DN936_c0_g1_i18	48.76	28.82	94.8	142.51	106.23	115.26	83.59	40.78	101.32	11.35	30.69	27.88	93.41	64.57	4.45	59.14	7.37	25.63	48.45	105.29	17.07	60.02	20.3	23.6	57.97	62.41	78.75	61.9	76.35	55.66	100.61		ZHANG	MOUSECREB/ATF bZIP transcription factor OS=Mus musculus OX=10090 GN=Crebzf PE=1 SV=2
TRINITY_DN936_c0_g1_i21	9.12	6.27	50.18	0	0	9.09	0	0	0	0	0	10.65	19.97	80.63	0	0	0	0	25.5	0	65.87	0	31.33	58.82	0	51.04	0	27.29	0	13.85	20.34		ZHANG	MOUSECREB/ATF bZIP transcription factor OS=Mus musculus OX=10090 GN=Crebzf PE=1 SV=2
TRINITY_DN936_c0_g1_i9	20.94	26.4	20.72	0	0	6.95	0	0	8.63	0	0	0	14.7	10.55	0	0	9.06	0	34.58	0	0	12.9	0	0	0	0	0	0	0	5	44.57		ZHANG	MOUSECREB/ATF bZIP transcription factor OS=Mus musculus OX=10090 GN=Crebzf PE=1 SV=2
TRINITY_DN936_c0_g1_i8	12.9	24.59	38.33	2.69	6.73	0	0	0	9.35	7.91	0	0	0	0	3.13	73.51	2.75	0	127.09	0	0	18.8	100.03	0	108.96	9.13	0	0	0	0	0		ZHANG	MOUSECREB/ATF bZIP transcription factor OS=Mus musculus OX=10090 GN=Crebzf PE=1 SV=2
TRINITY_DN936_c0_g1_i17	0	0	23.54	11.9	21.37	11.55	28.35	51.03	19.75	0	7.48	5.37	42.49	12.16	0	0	0	2.05	0	17.5	0	7.92	0	0	0	7.27	80.82	18.93	14.75	3.5	15.98		ZHANG	MOUSECREB/ATF bZIP transcription factor OS=Mus musculus OX=10090 GN=Crebzf PE=1 SV=2
TRINITY_DN936_c0_g1_i24	7.31	3.25	8.06	22.79	29.38	22.01	20.65	24.56	19.55	7.09	0	0	55.45	41.13	2.24	15.19	0	0	4.77	5.06	9.43	0	13.13	15.62	15.74	40.18	28.58	12.52	31.48	11.01	12.39		ZHANG	MOUSECREB/ATF bZIP transcription factor OS=Mus musculus OX=10090 GN=Crebzf PE=1 SV=2
TRINITY_DN17871_c0_g1_i3	0	0	0	0	0	0	0	0	0	0	0	0	0	0	22.58	0	0	0	0	0	0	0	0	0	0	1	0	0	0	0	0		ZHANG	MOUSECREB/ATF bZIP transcription factor OS=Mus musculus OX=10090 GN=Crebzf PE=1 SV=2
TRINITY_DN17871_c0_g1_i4	0	0	0	0	0	0	0	0	0	0	0	0	0	0	48.42	0	0	0	0	0	0	0	0	0	0	0	0	0	0	0	0		ZHANG	MOUSECREB/ATF bZIP transcription factor OS=Mus musculus OX=10090 GN=Crebzf PE=1 SV=2
TRINITY_DN34075_c1_g1_i1	0	0	0	0	0	0	0	0	0	0	0	0	0.99	0	0	0	0	0	3	0	0	0	0	0	0	0	0	0	0	0	0		ZHANG	HUMANCREB/ATF bZIP transcription factor OS=Homo sapiens OX=9606 GN=CREBZF PE=1 SV=2
TRINITY_DN2799_c0_g1_i7	0	1.19	0	1.28	0	0	0	0	0	0	0	0	0	0	0	0	0	0	0	0	0	0	0	0	0	0	5.59	0	1.2	0	0		ZGPAT	DANREZinc finger CCCH-type with G patch domain-containing protein OS=Danio rerio OX=7955 GN=zgpat PE=2 SV=1
TRINITY_DN78703_c0_g1_i1	0	1	0	0	0	0	0	0	0	1	6	20	60	80	0	0	0	0	0	7	57	38	36	1	2	2	1	0	0	1	0		ZGLP1	HUMANGATA-type zinc finger protein 1 OS=Homo sapiens OX=9606 GN=ZGLP1 PE=2 SV=1
TRINITY_DN8051_c0_g1_i13	0	0	11.04	0	11	0	6.88	8	0	0	7.69	0	0	0	4	12.79	4	0	21	15.21	0	55	17.81	19	17.99	11	0	0	0	0	0		ZFYV1	MOUSEZinc finger FYVE domain-containing protein 1 OS=Mus musculus OX=10090 GN=Zfyve1 PE=1 SV=2
TRINITY_DN8051_c0_g1_i5	0	9.11	0	0	0	0	0	0	0	0	0	20.6	58.64	82.98	0	0	0	0	0	0	10.84	0	32.14	0	0	0.77	0	1.42	6.51	0	14.81		ZFYV1	MOUSEZinc finger FYVE domain-containing protein 1 OS=Mus musculus OX=10090 GN=Zfyve1 PE=1 SV=2
TRINITY_DN8051_c0_g1_i32	0	0	0	5.26	0	0	0	0	0	0	3.24	0	0	0	0	0	0	0	0	0	0	0	0	0	0	4.27	0	0	0	0	0		ZFYV1	MOUSEZinc finger FYVE domain-containing protein 1 OS=Mus musculus OX=10090 GN=Zfyve1 PE=1 SV=2
TRINITY_DN8051_c0_g1_i14	0	3.89	0	2.27	0	2.05	0	0	0	0	1.98	1.63	2.36	0	0	0	0	0.64	0	0	0.83	0	2.05	0	0	0	0	0	0	0	0		ZFYV1	MOUSEZinc finger FYVE domain-containing protein 1 OS=Mus musculus OX=10090 GN=Zfyve1 PE=1 SV=2
TRINITY_DN8051_c0_g1_i20	0	0	0.14	0	0	0	0.49	0	0.19	0	0.64	0	0	0	0	0	0	0	0	1.67	0	0	0	0	1.01	0	2.27	0	1.48	1.41	0		ZFYV1	MOUSEZinc finger FYVE domain-containing protein 1 OS=Mus musculus OX=10090 GN=Zfyve1 PE=1 SV=2
TRINITY_DN8051_c0_g1_i3	13	0	0	4.45	0	0	0	0	21.81	0	0	0	0	36.48	0	0	0	0	0	0	12.99	0	0	0	0	0.77	17.2	0	0	11.59	0		ZFYV1	MOUSEZinc finger FYVE domain-containing protein 1 OS=Mus musculus OX=10090 GN=Zfyve1 PE=1 SV=2
TRINITY_DN8051_c0_g1_i7	0	0	0	0	0	0	1.62	0	0	0	3.46	4.77	0	10.77	0	0.21	0	0	0	0.11	0	0	0	0	0	0	2.53	3.3	0	0	3.19		ZFYV1	MOUSEZinc finger FYVE domain-containing protein 1 OS=Mus musculus OX=10090 GN=Zfyve1 PE=1 SV=2
TRINITY_DN8051_c0_g1_i34	0	0	6.82	4.02	0	4.17	0	0	0	11	0	0	0	0	0	0	0	0	0	0	0	0	0	0	0	0	0	0	10.01	0	0		ZFYV1	MOUSEZinc finger FYVE domain-containing protein 1 OS=Mus musculus OX=10090 GN=Zfyve1 PE=1 SV=2
TRINITY_DN8051_c0_g1_i24	0	0	0	0	0	8.77	0	0	0	0	0	0	0	8.77	0	0	0	3.36	0	0	2.34	0	0	0	0	5.18	0	12.28	0	0	0		ZFYV1	HUMANZinc finger FYVE domain-containing protein 1 OS=Homo sapiens OX=9606 GN=ZFYVE1 PE=1 SV=1
TRINITY_DN64130_c0_g1_i1	0	0	0	0	0	0	0	0	0	0	0	0	0	0	9	0	0	0	0	0	0	0	0	0	0	0	0	0	0	0	0		ZFYV1	HUMANZinc finger FYVE domain-containing protein 1 OS=Homo sapiens OX=9606 GN=ZFYVE1 PE=1 SV=1
TRINITY_DN91996_c0_g1_i1	0	0	0	0	0	0	0	0	0	0	0	0	0	0	2	0	0	0	0	0	0	0	0	0	0	0	0	0	0	0	0		ZFYV1	HUMANZinc finger FYVE domain-containing protein 1 OS=Homo sapiens OX=9606 GN=ZFYVE1 PE=1 SV=1
TRINITY_DN113310_c0_g1_i1	0	0	0	0	0	0	0	0	0	0	0	0	0	0	3	0	0	0	0	0	0	0	0	0	0	0	0	0	0	0	0		ZFYV1	HUMANZinc finger FYVE domain-containing protein 1 OS=Homo sapiens OX=9606 GN=ZFYVE1 PE=1 SV=1
TRINITY_DN92025_c0_g1_i1	0	0	0	0	0	0	0	0	0	0	0	0	0	0	2	0	0	0	0	0	0	0	0	0	0	0	0	0	0	0	0		ZFYV1	HUMANZinc finger FYVE domain-containing protein 1 OS=Homo sapiens OX=9606 GN=ZFYVE1 PE=1 SV=1
TRINITY_DN44638_c0_g1_i1	0	0	0	0	0	0	0	0	0	0	0	0	0	0	15	0	0	0	0	0	0	0	0	0	0	0	0	0	0	0	0		ZFY27	MOUSEProtrudin OS=Mus musculus OX=10090 GN=Zfyve27 PE=1 SV=2
TRINITY_DN43507_c0_g2_i1	0	0	0	0	0	0	0	0	0	0	0	0	0	0	12	0	0	1	0	0	0	0	0	0	0	0	0	0	0	0	0		ZFY26	MOUSEZinc finger FYVE domain-containing protein 26 OS=Mus musculus OX=10090 GN=Zfyve26 PE=1 SV=2
TRINITY_DN118849_c0_g1_i1	0	0	0	0	0	0	0	0	0	0	0	0	0	0	17	0	0	0	0	0	0	0	0	0	0	0	0	0	0	0	0		ZFY26	MOUSEZinc finger FYVE domain-containing protein 26 OS=Mus musculus OX=10090 GN=Zfyve26 PE=1 SV=2
TRINITY_DN28392_c0_g1_i1	0	0	0	0	0	0	0	0	0	0	0	0	0	0	14.49	0	0	0	0	0	0	0	0	0	0	0	0	0	0	0	0		ZFY26	HUMANZinc finger FYVE domain-containing protein 26 OS=Homo sapiens OX=9606 GN=ZFYVE26 PE=1 SV=3
TRINITY_DN75347_c0_g1_i1	0	0	0	0	0	0	0	0	0	0	0	0	0	0	13	0	0	0	0	0	0	0	0	0	0	0	0	0	0	0	0		ZFY26	HUMANZinc finger FYVE domain-containing protein 26 OS=Homo sapiens OX=9606 GN=ZFYVE26 PE=1 SV=3
TRINITY_DN1674_c0_g1_i24	12.28	21.19	17.52	87.39	52.55	17.27	41.56	64.79	37.33	34.93	31.47	33.04	159.64	49.39	0	22.27	12.68	0	56.02	134.14	69.55	33.11	31.9	89.84	74.28	32.87	98.08	47.01	34.33	16.74	17.06		ZFY26	BOVINZinc finger FYVE domain-containing protein 26 OS=Bos taurus OX=9913 GN=ZFYVE26 PE=3 SV=1
TRINITY_DN1674_c0_g1_i3	120.12	102.98	35.19	30.74	0	0.01	54.23	0	25.48	100.71	19.82	43.22	99.12	199.64	0	0	27.35	0	0	116.58	0	0	9.56	113.83	146.59	154.58	36.06	59.6	16.73	0	7.84		ZFY26	BOVINZinc finger FYVE domain-containing protein 26 OS=Bos taurus OX=9913 GN=ZFYVE26 PE=3 SV=1
TRINITY_DN43507_c0_g1_i1	0	0	0	0	0	0	0	0	0	0	0	0	0	0	2	0	0	0	0	0	0	0	0	0	0	0	0	0	0	0	0		ZFY26	AILMEZinc finger FYVE domain-containing protein 26 OS=Ailuropoda melanoleuca OX=9646 GN=ZFYVE26 PE=3 SV=1
TRINITY_DN3216_c0_g1_i19	0	19.22	24.69	22.34	18.83	31.05	31.06	0	7.56	21.77	32.04	10.82	73.61	36.97	0	46.73	4.04	5.99	27.76	49.15	5.77	9.46	29.45	29.38	23.9	12.02	11.93	31.84	22.83	12.5	9.28		ZFY21	RATZinc finger FYVE domain-containing protein 21 OS=Rattus norvegicus OX=10116 GN=Zfyve21 PE=3 SV=1
TRINITY_DN3216_c0_g1_i4	32.09	18.21	0	0	22.15	0	0	22.98	20.59	0	0	0	0	0	0	0	16.24	0	7.52	0	15.05	0	0	21.61	8.69	33.02	21.58	0	18.41	5.12	0		ZFY21	RATZinc finger FYVE domain-containing protein 21 OS=Rattus norvegicus OX=10116 GN=Zfyve21 PE=3 SV=1
TRINITY_DN3216_c0_g1_i8	0	0	0	0	0	0	0	0	0	0	0	0	0	0	0	0	0	0	0	0	0	0	0	0	0	0	0	0	0	0	27.37		ZFY21	RATZinc finger FYVE domain-containing protein 21 OS=Rattus norvegicus OX=10116 GN=Zfyve21 PE=3 SV=1
TRINITY_DN3216_c0_g1_i14	0	0.96	0	6.48	0	8.27	0	0	0	3.11	0	0	0	6.18	0	13.93	0	0	0	0	4.32	5.79	9.22	0	2.58	3.38	5.84	5.77	0	0	0		ZFY21	RATZinc finger FYVE domain-containing protein 21 OS=Rattus norvegicus OX=10116 GN=Zfyve21 PE=3 SV=1
TRINITY_DN123975_c0_g1_i1	0	0	0	0	0	0	0	0	0	0	0	0	0	0	5	0	0	0	0	0	0	0	0	0	0	0	0	0	0	0	0		ZFY21	MOUSEZinc finger FYVE domain-containing protein 21 OS=Mus musculus OX=10090 GN=Zfyve21 PE=1 SV=2
TRINITY_DN3216_c0_g1_i18	0	1.64	0	0	0	0	0	9.52	5.34	0	0	0	0	0	4.31	0	0	0	9.26	0	0	13.45	0	0	0	0	0.68	0.64	4.97	0	0		ZFY21	BOVINZinc finger FYVE domain-containing protein 21 OS=Bos taurus OX=9913 GN=ZFYVE21 PE=2 SV=1
TRINITY_DN3216_c0_g1_i9	10.46	0	0	0	0	0	0	3.69	0	0	0	0	0	0	0	0	0	2.24	6.52	0	2.55	0	2.08	4.62	0	4.43	2.6	0	0	0	0		ZFY21	BOVINZinc finger FYVE domain-containing protein 21 OS=Bos taurus OX=9913 GN=ZFYVE21 PE=2 SV=1
TRINITY_DN3216_c0_g1_i20	0	2.73	10.12	4.34	0	4.84	11.58	0	0	0	9.02	2.57	0	0	0	0	2.04	0	0	4.78	0	0	0	0	6.48	0	0	14.79	0	0	6.82		ZFY21	BOVINZinc finger FYVE domain-containing protein 21 OS=Bos taurus OX=9913 GN=ZFYVE21 PE=2 SV=1
TRINITY_DN3216_c0_g1_i15	0	4.78	2.15	3.03	2	0	0	0	3.77	1.09	0	0	2.09	0	1.69	5.46	0	0	0	6.53	2.48	0	0	2.44	0	2.35	0	0	0	5.04	5.11		ZFY21	BOVINZinc finger FYVE domain-containing protein 21 OS=Bos taurus OX=9913 GN=ZFYVE21 PE=2 SV=1
TRINITY_DN63867_c0_g1_i1	0	0	0	0	0	0	0	0	0	0	0	0	0	0	11	0	0	0	0	0	0	0	0	0	0	0	0	0	0	0	0		ZFY1	XENLAZinc finger Y-chromosomal protein 1 OS=Xenopus laevis OX=8355 GN=zfy1 PE=2 SV=1
TRINITY_DN39467_c0_g1_i74	0	5.69	7.95	0	3.67	4.52	0	0	1.63	0	0	6.72	0	17.61	0	15.66	0	0	0	0	0	17.05	0	0	9.09	12.68	0	0.46	0	7.97	0		ZFY	GORGOZinc finger Y-chromosomal protein OS=Gorilla gorilla gorilla OX=9595 GN=ZFY PE=3 SV=1
TRINITY_DN47851_c0_g1_i2	0	33.55	26.32	89.74	21.36	21.9	11.09	37.53	0	0	0	19.86	0	0	5	0	43.73	0	8.88	92.9	41.1	0	48.8	40.56	38.03	51.13	0	40.66	24.92	0	0		ZFR2	HUMANZinc finger RNA-binding protein 2 OS=Homo sapiens OX=9606 GN=ZFR2 PE=2 SV=3
TRINITY_DN47851_c0_g1_i7	96.82	0	22.4	0	30.01	19.13	31.11	0	42.72	30.38	19.38	0	111.18	38.51	0	92.92	0	0	42.11	0	0	100.31	0	17.89	16.9	21.85	19.39	0	0	0	23.96		ZFR2	HUMANZinc finger RNA-binding protein 2 OS=Homo sapiens OX=9606 GN=ZFR2 PE=2 SV=3
TRINITY_DN47851_c0_g1_i3	0	0	0	0	0	0	0	0	0	0	22.62	0	24.82	31.86	0	0	0	6.94	0	0	0	0	0	0	0	0	13.76	0	0	11.98	0		ZFR2	HUMANZinc finger RNA-binding protein 2 OS=Homo sapiens OX=9606 GN=ZFR2 PE=2 SV=3
TRINITY_DN47851_c0_g1_i11	0.18	10.45	6.36	4.11	6.61	19.64	0	0	0.18	0	0	2.03	0	11.59	0	0.22	3.66	6.06	6.85	0	0	19.19	14.47	0	0	0	3.41	7.01	12.02	0.02	0		ZFR	XENTRZinc finger RNA-binding protein OS=Xenopus tropicalis OX=8364 GN=zfr PE=2 SV=1
TRINITY_DN28295_c0_g3_i2	0	0	0	0	0	0	0	0	0	0	0	0	0	0	20.37	0	0	0	0	0	0	0	0	0	0	0	0	0	0	0	0		ZFR	XENLAZinc finger RNA-binding protein OS=Xenopus laevis OX=8355 GN=zfr PE=2 SV=1
TRINITY_DN28295_c0_g3_i1	0	0	0	0	0	0	0	0	0	0	0	0	0	0	25.99	0	0	0	0	0	0	0	0	0	0	0	0	0	0	0	0		ZFR	XENLAZinc finger RNA-binding protein OS=Xenopus laevis OX=8355 GN=zfr PE=2 SV=1
TRINITY_DN28295_c0_g3_i7	0	0	0	0	0	0	0	0	0	0	0	0	0	0	13.06	0	0	0	0	0	0	0	0	0	0	0	0	0	0	0	0		ZFR	XENLAZinc finger RNA-binding protein OS=Xenopus laevis OX=8355 GN=zfr PE=2 SV=1
TRINITY_DN47851_c0_g1_i9	0	0	9.93	0	2.01	1.85	0	1.41	0	2.46	0	1.65	0	2.07	0	0	2.61	0	0	0	0	0	0	0	0	0	1.74	2.33	2.06	0	0		ZFR	RATZinc finger RNA-binding protein OS=Rattus norvegicus OX=10116 GN=Zfr PE=1 SV=2
TRINITY_DN47851_c0_g1_i4	0	0	0	0	0	1.7	1.8	0	3.84	0	0	1.92	2.42	4.97	0	6.85	0	0	3.84	3.07	2.85	2.08	1.34	0	2.92	0	2.71	0	0	0	0		ZFR	RATZinc finger RNA-binding protein OS=Rattus norvegicus OX=10116 GN=Zfr PE=1 SV=2
TRINITY_DN11606_c2_g1_i1	0	0	0	0	0	0	0	0	0	0	0	0	0	0	6	0	0	0	0	0	0	0	0	0	0	0	0	0	0	0	0		ZFPL1	NEMVEZinc finger protein-like 1 homolog OS=Nematostella vectensis OX=45351 GN=zfpl1 PE=3 SV=1
TRINITY_DN791_c0_g1_i3	0	0	0	0	0	0	0	0	0	0	0	0	1.48	0	0	0	0	0	0	1.35	0	0	2.86	0	0	0	1.35	0	0	0	0		ZFPL1	NEMVEZinc finger protein-like 1 homolog OS=Nematostella vectensis OX=45351 GN=zfpl1 PE=3 SV=1
TRINITY_DN791_c0_g1_i33	2.44	1.27	0	0	0	1.51	0	0	0	0	0	1.17	1.43	0	0	1.73	2.44	0	0	0	0	0	0	1.43	0	0	0	0	0	0	0		ZFPL1	NEMVEZinc finger protein-like 1 homolog OS=Nematostella vectensis OX=45351 GN=zfpl1 PE=3 SV=1
TRINITY_DN791_c0_g1_i31	0	0	0	2.24	1.21	0	2.8	0	0	0	0	1.16	1.3	0	0	0	0	0	0	0	0	0	0	1.36	2.85	0	1.26	0	0	0	4.24		ZFPL1	NEMVEZinc finger protein-like 1 homolog OS=Nematostella vectensis OX=45351 GN=zfpl1 PE=3 SV=1
TRINITY_DN3549_c0_g1_i56	18.39	0	8.69	32.97	6.24	9.01	0	0	3.47	5.61	7.92	2.88	14.05	8.05	3	8.22	4.69	0	4.42	25.47	0	28.72	4.76	4.38	24.94	0	4.42	0	0	5.07	0		ZFN2B	MOUSEAN1-type zinc finger protein 2B OS=Mus musculus OX=10090 GN=Zfand2b PE=1 SV=1
TRINITY_DN3549_c0_g1_i2	11	0	9.99	0	12.28	0	2.87	4.36	3.24	0	0	0	18.25	0	0	64.61	12.17	2	38.25	0	5.62	28.03	9.81	10.41	0	2.38	18.44	5.18	10.74	6.62	18.72		ZFN2B	MOUSEAN1-type zinc finger protein 2B OS=Mus musculus OX=10090 GN=Zfand2b PE=1 SV=1
TRINITY_DN3549_c0_g1_i53	0	0	5.68	0	9.14	8	9.5	0	0	0	0	0	0	0	0	0	0	0	16.71	0	0	0	13.71	8.44	1.88	0	0	0	0	0	0		ZFN2B	MOUSEAN1-type zinc finger protein 2B OS=Mus musculus OX=10090 GN=Zfand2b PE=1 SV=1
TRINITY_DN3549_c0_g1_i24	0.92	0	0	6.7	0	12.94	0	0	1.11	0	2.4	0	0	10.15	0	0	8.11	0	0	20.19	3.8	2.4	0	0	0	19.39	0	10.28	2.6	0	8.61		ZFN2B	MOUSEAN1-type zinc finger protein 2B OS=Mus musculus OX=10090 GN=Zfand2b PE=1 SV=1
TRINITY_DN3549_c0_g1_i58	4.73	0	0	2.1	0	0	0	0	0	0	0	0	4.55	0	0	7.61	0	0	4.74	0	0	0	0	3.2	0	0	0	0	0	0	5.2		ZFN2B	HUMANAN1-type zinc finger protein 2B OS=Homo sapiens OX=9606 GN=ZFAND2B PE=1 SV=1
TRINITY_DN3549_c0_g1_i51	0	0	1.42	0	0	5.82	0	0	0	0	0	0	1.53	5.48	0	0	0	0	0	0	0	0	0	3.59	0	0	1.15	0	7.32	0	3.48		ZFN2B	HUMANAN1-type zinc finger protein 2B OS=Homo sapiens OX=9606 GN=ZFAND2B PE=1 SV=1
TRINITY_DN3549_c0_g1_i28	0	0	1.46	3.23	0	0	0	1.92	3.34	2.37	3.26	2.81	0	0	0	3.46	0	0	0	3.63	0	3.19	6.44	0	7.38	6.54	0	6.54	0	0	0		ZFN2B	HUMANAN1-type zinc finger protein 2B OS=Homo sapiens OX=9606 GN=ZFAND2B PE=1 SV=1
TRINITY_DN3549_c0_g1_i49	0	0	0	0	0	0	0	0	0	0	0	1	1.12	0	0	0	0	0	0	0	0	0	0	0	0	1	0	0	0	0	0		ZFN2B	HUMANAN1-type zinc finger protein 2B OS=Homo sapiens OX=9606 GN=ZFAND2B PE=1 SV=1
TRINITY_DN3549_c0_g1_i65	3.36	0	0	0	0	0	0	3.04	2.85	4.61	0	0	2.12	5.33	0	0	2.03	0	2.74	0	0	0	9.28	7.98	0	6.33	0	0	0	0	0		ZFN2B	HUMANAN1-type zinc finger protein 2B OS=Homo sapiens OX=9606 GN=ZFAND2B PE=1 SV=1
TRINITY_DN3549_c0_g1_i68	2.85	19.67	0	0	0	0.21	4.45	0.69	4.97	0	1.43	6.31	5.38	0	0	15.5	0	0	3.81	0	3.59	6.76	0	0	6.8	0	0	0	2.34	0	0		ZFN2B	HUMANAN1-type zinc finger protein 2B OS=Homo sapiens OX=9606 GN=ZFAND2B PE=1 SV=1
TRINITY_DN3549_c0_g1_i57	2.74	0	13.68	0	2.7	6.1	1.74	0	0	0	0	0	0	0	0	0	0	0	0	0	0	2.69	0	0	0	0	0	0	0	0	0		ZFN2B	HUMANAN1-type zinc finger protein 2B OS=Homo sapiens OX=9606 GN=ZFAND2B PE=1 SV=1
TRINITY_DN3549_c0_g1_i35	0	8.33	8.08	0	10.64	2.93	5.44	0	8.02	1.41	0	0	0	0	0	5.61	0	0	2.69	3.71	0	6.01	0	0	0	1.37	0	0	0	0	0		ZFN2B	HUMANAN1-type zinc finger protein 2B OS=Homo sapiens OX=9606 GN=ZFAND2B PE=1 SV=1
TRINITY_DN39782_c0_g1_i5	0	0	0	0	0	0	0	0	0	0	0	0	0	0	0	0	0	0	0	4	1	0	0	0	0	1	0	0	0	0	1		ZFN2A	RATAN1-type zinc finger protein 2A OS=Rattus norvegicus OX=10116 GN=Zfand2a PE=2 SV=1
TRINITY_DN116864_c0_g1_i1	0	0	0	0	0	0	0	0	0	0	0	0	0	0	0	0	2	0	0	1	0	0	0	0	0	0	0	0	0	0	0		ZFHX3	HUMANZinc finger homeobox protein 3 OS=Homo sapiens OX=9606 GN=ZFHX3 PE=1 SV=2
TRINITY_DN30385_c0_g1_i3	0	0	1	0	0	0	0	0	1.96	0	0	0	0	0	0	0	0	0	2.95	0	0	0	0	0	0	0	0	0	0	0	0		ZFAN6	BOVINAN1-type zinc finger protein 6 OS=Bos taurus OX=9913 GN=ZFAND6 PE=2 SV=1
TRINITY_DN12787_c0_g1_i1	0	0	0	0	0	0	0	0	0	0	0	0	0	0	97	0	0	0	0	0	0	0	0	0	0	0	0	0	0	0	0		ZFAN5	RATAN1-type zinc finger protein 5 OS=Rattus norvegicus OX=10116 GN=Zfand5 PE=1 SV=1
TRINITY_DN4031_c0_g1_i17	0	0	0	0	0	0	0	0	0	3.16	0	0	0	0	0	0	0	0	0	0	0	0	0	0	0	0	0	0	0	8.63	17.51		ZFAN5	HUMANAN1-type zinc finger protein 5 OS=Homo sapiens OX=9606 GN=ZFAND5 PE=1 SV=1
TRINITY_DN4031_c0_g1_i13	0	3.02	0	1.33	0	0	0	3.07	0	0	0	0	0	10.23	0	1.21	0	1	0	0	0	0	0	2.82	1.27	0.91	0	0	0	4.04	0		ZFAN5	HUMANAN1-type zinc finger protein 5 OS=Homo sapiens OX=9606 GN=ZFAND5 PE=1 SV=1
TRINITY_DN4031_c0_g1_i22	8.96	2.7	0	1.3	0	4.98	9.35	0	0	0	12.83	0	14.12	0	0	0	3.72	0	5.25	0	0	0	0	0	0	4.33	10.08	0	5.29	0	4.59		ZFAN5	HUMANAN1-type zinc finger protein 5 OS=Homo sapiens OX=9606 GN=ZFAND5 PE=1 SV=1
TRINITY_DN4031_c0_g1_i3	0	0	6.86	0	0	0	0	0	0	0	0	1.8	0	0	0	0	0	0	0	1.42	1.37	3.52	0	0	0	0	0	0	0	7.18	0		ZFAN5	HUMANAN1-type zinc finger protein 5 OS=Homo sapiens OX=9606 GN=ZFAND5 PE=1 SV=1
TRINITY_DN30385_c0_g1_i1	0	0	0	0	0	0	0	0	0.04	1	0	0	0	0	0	0	0	0	8.03	0	0	0	0	0	0	2	0	0	0	1	0		ZFAN5	HUMANAN1-type zinc finger protein 5 OS=Homo sapiens OX=9606 GN=ZFAND5 PE=1 SV=1
TRINITY_DN4031_c0_g1_i11	0	0	0	0	5.82	0	0	0	0	0	0	0	0	0	0	0	0	0	0	0	0	0	0	0	0	0	0	2.83	0	0	4.3		ZFAN5	HUMANAN1-type zinc finger protein 5 OS=Homo sapiens OX=9606 GN=ZFAND5 PE=1 SV=1
TRINITY_DN77211_c0_g1_i1	0	0	0	0	0	0	0	0	0	0	0	0	0	0	8	0	0	0	0	0	0	0	0	0	0	0	0	0	0	0	0		ZFAN4	MOUSEAN1-type zinc finger protein 4 OS=Mus musculus OX=10090 GN=Zfand4 PE=4 SV=2
TRINITY_DN3607_c3_g1_i14	28.53	28.65	43.34	52.63	56.24	28.17	52.29	39.22	61.85	31.76	39.39	24.3	81.65	95.97	5	66	41.75	8	59.29	93.17	48.34	72.35	50.9	72.63	51.09	43	41.8	52.24	37.57	7	14.06		ZFAN3	XENLAAN1-type zinc finger protein 3 homolog OS=Xenopus laevis OX=8355 GN=zfand3 PE=2 SV=1
TRINITY_DN3607_c3_g1_i2	0	11.42	12.32	8.26	5.9	2.7	0	6.01	0	0	0	0	6.07	0	0	0	0	0	0	1.83	1.61	0	3.08	0	3.92	0	2.28	0	0	4	0		ZFAN3	XENLAAN1-type zinc finger protein 3 homolog OS=Xenopus laevis OX=8355 GN=zfand3 PE=2 SV=1
TRINITY_DN3607_c3_g1_i1	0	4.18	0	0	0.38	0	0	0	0	4.45	6.5	0	0	7.03	0	0	0	0	3.41	0	4.04	3.03	0	3.32	0	0	6.71	0	0	0	4.55		ZFAN3	XENLAAN1-type zinc finger protein 3 homolog OS=Xenopus laevis OX=8355 GN=zfand3 PE=2 SV=1
TRINITY_DN3607_c3_g1_i12	2.67	0	2.26	1.92	5.48	0	3	0	0	0	0	0	3.01	0	0	0	1.25	0	0	0	0	0	1.42	0	0	0	0	0	4.37	0	0		ZFAN3	XENLAAN1-type zinc finger protein 3 homolog OS=Xenopus laevis OX=8355 GN=zfand3 PE=2 SV=1
TRINITY_DN3607_c3_g1_i9	6.79	1.74	0	1.19	0	13.13	0.71	0.77	4.26	0.79	2.11	0	7.27	1.76	0	0	0	0	0.41	0	0	1.76	5.6	1.06	5.99	0	7.21	10.55	0.97	0	0.39		ZFAN3	XENLAAN1-type zinc finger protein 3 homolog OS=Xenopus laevis OX=8355 GN=zfand3 PE=2 SV=1
TRINITY_DN61988_c0_g1_i1	0	0	0	0	0	0	0	0	0	0	0	0	0	0	5	0	0	0	0	0	0	0	0	0	0	1	0	0	0	0	0		ZFAN3	HUMANAN1-type zinc finger protein 3 OS=Homo sapiens OX=9606 GN=ZFAND3 PE=1 SV=1
TRINITY_DN28490_c1_g1_i1	0	0	0	0	0	0	0	0	0	0	0	0	0	0	35	0	0	0	0	0	0	0	0	0	0	1	0	0	0	0	0		ZFAN3	HUMANAN1-type zinc finger protein 3 OS=Homo sapiens OX=9606 GN=ZFAND3 PE=1 SV=1
TRINITY_DN3607_c3_g1_i7	0	0	0	0	0	0	0	0	1.89	0	0	3.7	0	0	0	0	0	0	1.88	0	0	1.86	0	0	0	0	0	0	0	0	0		ZFAN3	HUMANAN1-type zinc finger protein 3 OS=Homo sapiens OX=9606 GN=ZFAND3 PE=1 SV=1
TRINITY_DN1745_c1_g1_i5	0	0	0	0	0	1.54	0	0	2	0	0	1.71	1.46	0	0	0	0	0	10.24	0	0	0	0	0	0	0	0	5.64	0	1	0		ZFAN1	MOUSEAN1-type zinc finger protein 1 OS=Mus musculus OX=10090 GN=Zfand1 PE=1 SV=1
TRINITY_DN1745_c1_g1_i16	4.1	0	0	0	0	0	2.62	0	1	0	6.62	1.56	6.04	4.52	0	4.77	1.28	0	4.33	0	0	0	0	8.35	0	1.58	0	3.71	0	4.39	5.67		ZFAN1	HUMANAN1-type zinc finger protein 1 OS=Homo sapiens OX=9606 GN=ZFAND1 PE=1 SV=1
TRINITY_DN1745_c1_g1_i20	0	3.01	0	3.59	14.74	0	0	0	0	1.46	7.33	0	2.5	26.81	3	0	0	0	0	0	0	0	13.91	6.91	0	0	0	0	12.46	0	0		ZFAN1	HUMANAN1-type zinc finger protein 1 OS=Homo sapiens OX=9606 GN=ZFAND1 PE=1 SV=1
TRINITY_DN1745_c1_g1_i18	0	0	0	0	0	2.81	0	0	0	0	3.67	0	0	12.94	0	14.79	4.39	0	18.81	0	0	0	0	0	3.59	0	10.48	12.64	0	0	0		ZFAN1	HUMANAN1-type zinc finger protein 1 OS=Homo sapiens OX=9606 GN=ZFAND1 PE=1 SV=1
TRINITY_DN1745_c1_g1_i10	8.78	6.86	8	4.41	3.13	2.25	6.4	5.96	6	0	8.05	9.84	13.61	9.38	0	35.62	5.7	0	33.16	27.78	23.46	6.98	9.47	7.56	0	24.41	0	17.19	10.49	5.17	12.53		ZFAN1	HUMANAN1-type zinc finger protein 1 OS=Homo sapiens OX=9606 GN=ZFAND1 PE=1 SV=1
TRINITY_DN1745_c1_g1_i21	0	0	0	0	1.13	2.4	0	0	0	1.54	0	1.89	0	0	0	0	0	0	15.32	1.2	0	0	0	0	0	0.01	0	3.35	0	0	0		ZFAN1	HUMANAN1-type zinc finger protein 1 OS=Homo sapiens OX=9606 GN=ZFAND1 PE=1 SV=1
TRINITY_DN1745_c1_g1_i31	1.12	2.13	0	0	0	0	0	0	0	0	0	0	3.4	0	0	1.28	1	0	0	0	0	1.87	1.15	3.57	0	0	3.11	1.85	0	1	2.51		ZFAN1	HUMANAN1-type zinc finger protein 1 OS=Homo sapiens OX=9606 GN=ZFAND1 PE=1 SV=1
TRINITY_DN1745_c1_g1_i14	0	0	0	0	0	0	0.64	0	0	0	0	0	0	17.69	0	0	0	0	0	5.03	8.53	0	0	0	0	0	0.42	0	0	0	8.06		ZFAN1	HUMANAN1-type zinc finger protein 1 OS=Homo sapiens OX=9606 GN=ZFAND1 PE=1 SV=1
TRINITY_DN1745_c1_g1_i30	0	0	0	0	0	0	0	0.04	0	0	1.67	0	0	0	0	1.38	0	1	0	0	0	2.15	3.87	0	0.48	0	0	0	3.05	8.44	0		ZFAN1	HUMANAN1-type zinc finger protein 1 OS=Homo sapiens OX=9606 GN=ZFAND1 PE=1 SV=1
TRINITY_DN135546_c0_g1_i1	0	0	0	0	0	0	0	0	0	0	0	0	0	0	5	0	0	0	0	0	0	0	0	0	0	0	0	0	0	0	0		ZEUS1	ARATHThymidylate kinase OS=Arabidopsis thaliana OX=3702 GN=ZEU1 PE=2 SV=1
TRINITY_DN29247_c0_g1_i1	0	0	0	0	0	0	0	0	0	0	0	0	0	0	5.45	0	0	0	0	0	0	0	0	0	0	0	0	0	0	0	0		ZERSY	ZINZEZerumbone synthase OS=Zingiber zerumbet OX=311405 GN=ZSD1 PE=1 SV=1
TRINITY_DN71011_c0_g1_i1	0	0	0	0	0	0	0	0	0	0	0	0	0	0	0	0	2	0	0	0	0	0	0	0	0	0	0	0	0	0	0		ZEP1	MOUSEZinc finger protein 40 OS=Mus musculus OX=10090 GN=Hivep1 PE=1 SV=1
TRINITY_DN90364_c0_g1_i1	0	0	0	0	0	0	0	0	0	0	0	0	0	1	0	0	0	0	0	0	0	0	0	0	0	0	0	1	0	0	0		ZDS	CAPANZeta-carotene desaturase, chloroplastic/chromoplastic OS=Capsicum annuum OX=4072 GN=ZDS PE=1 SV=1
TRINITY_DN1251_c0_g1_i177	2.34	2.57	7.75	4.72	7.14	2.62	0	1.72	1.47	1.3	1.36	0	6.03	2.35	0	1.26	4.34	0	6.5	1.24	0	4.17	3.04	9.24	9.17	2.93	4.15	0	9.88	13.95	11.04		ZDHC9	HUMANPalmitoyltransferase ZDHHC9 OS=Homo sapiens OX=9606 GN=ZDHHC9 PE=1 SV=2
TRINITY_DN26712_c0_g1_i2	3	0	1.18	1	1.01	3	2.27	2.34	2	4	4	2	11	4	0	2	0	0	5	4.74	3	3	0	9.09	3.51	3.48	2.38	6.86	1	3	3		ZDHC9	BOVINPalmitoyltransferase ZDHHC9 OS=Bos taurus OX=9913 GN=ZDHHC9 PE=2 SV=1
TRINITY_DN2478_c0_g1_i1	3	4.46	1.79	0	3.86	0	0	0	3.12	1.53	0	0	0	0	0	0	0	0	0	5.51	4.18	0	0	0	3	0	0	1.84	3.9	0	0		ZDHC8	MOUSEProbable palmitoyltransferase ZDHHC8 OS=Mus musculus OX=10090 GN=Zdhhc8 PE=1 SV=1
TRINITY_DN2478_c0_g1_i16	2.51	4.52	0	2.13	1.21	6.79	4.58	0	0	1.09	0	2	1.43	5.28	0	2.19	0	0	3.3	0	0	0	1.73	1.05	1.36	0	0.84	1.03	1.04	0	0		ZDHC8	CANLFProbable palmitoyltransferase ZDHHC8 OS=Canis lupus familiaris OX=9615 GN=ZDHHC8 PE=2 SV=1
TRINITY_DN2478_c0_g1_i19	0	0	4	0	3.06	0	4.74	0	3.06	0	2.4	0	0.56	0	0	0	2.31	0	0.27	2.53	0	0	0	0	0	1.53	0	0	0	0	0		ZDHC8	CANLFProbable palmitoyltransferase ZDHHC8 OS=Canis lupus familiaris OX=9615 GN=ZDHHC8 PE=2 SV=1
TRINITY_DN2478_c0_g1_i2	0	0	12.45	8.2	0	5.39	18.12	3.7	1.73	0	0.68	5.19	17.17	12.1	0	0	5.01	0	0	0	0	2.85	0	7.95	3.39	12.48	3.36	0	9.71	0	15.74		ZDHC8	CANLFProbable palmitoyltransferase ZDHHC8 OS=Canis lupus familiaris OX=9615 GN=ZDHHC8 PE=2 SV=1
TRINITY_DN124_c0_g1_i8	1.35	4.47	3.02	9.39	4.25	3.98	0	3.38	0	1.73	1.23	1.8	5.82	0	0	0	1.53	0	3.39	0	1.71	0	7.6	0	0	1.66	4.72	1.93	2.02	0	0		ZDHC6	MOUSEPalmitoyltransferase ZDHHC6 OS=Mus musculus OX=10090 GN=Zdhhc6 PE=1 SV=1
TRINITY_DN124_c0_g1_i10	0	5.92	0	0	0.53	0	11.07	3.2	0	0	0	0	0	7.12	0	0	0	0	13.44	0	0	4.98	8.92	0	0	10.42	4.47	0	0	0	0		ZDHC6	MOUSEPalmitoyltransferase ZDHHC6 OS=Mus musculus OX=10090 GN=Zdhhc6 PE=1 SV=1
TRINITY_DN30065_c1_g2_i2	0	0	0	0	0	0	0	0	0	0	0	0	0	0	2	0	0	0	0	0	0	0	0	0	0	0	0	0	0	0	0		ZDHC6	MOUSEPalmitoyltransferase ZDHHC6 OS=Mus musculus OX=10090 GN=Zdhhc6 PE=1 SV=1
TRINITY_DN124_c0_g1_i12	10.41	8.42	7.36	15.39	3.76	4.64	0.01	0	7.97	4.57	6.14	0	12.44	14.86	1	20.88	12.65	12.05	12.86	2.21	0	17.53	22.66	26.09	6.89	11.85	3.52	0	3.15	0	0		ZDHC6	HUMANPalmitoyltransferase ZDHHC6 OS=Homo sapiens OX=9606 GN=ZDHHC6 PE=1 SV=1
TRINITY_DN124_c0_g1_i13	14.66	5.85	5.72	3.11	17.46	22.91	0	6.23	3.06	7.7	6	3.05	12.75	21.68	0	44.39	12.71	2.95	47.28	0	6.19	18.63	21.19	47.91	23.3	2.79	12.38	0	15.42	3.07	0		ZDHC6	HUMANPalmitoyltransferase ZDHHC6 OS=Homo sapiens OX=9606 GN=ZDHHC6 PE=1 SV=1
TRINITY_DN124_c0_g1_i3	15.58	19.34	32.9	16.11	0	13.46	13.93	16.19	12.98	0	13.63	19.15	52.44	19.34	0	11.73	0.11	0	0	25.79	19.1	27.87	1.64	0	17.81	12.28	7.91	20.07	8.41	10.93	10		ZDHC6	HUMANPalmitoyltransferase ZDHHC6 OS=Homo sapiens OX=9606 GN=ZDHHC6 PE=1 SV=1
TRINITY_DN4254_c0_g2_i58	0	0	0	0	2.29	0	0	2.11	0	0	0	0	5	0	0	0	1.71	0	6.8	0	0.38	2.04	0	5.64	0.19	0	0	0	0	0	0		ZDHC6	DICDIPutative ZDHHC-type palmitoyltransferase 6 OS=Dictyostelium discoideum OX=44689 GN=DDB	G0275149 PE=2 SV=1
TRINITY_DN4254_c0_g2_i24	0	2.56	0	0	0	0	0	0	0	0	0	0	0	0	0	0	0	0	0	0	0	0	0	3.29	2.57	0	0	0	0	0	0		ZDHC6	DICDIPutative ZDHHC-type palmitoyltransferase 6 OS=Dictyostelium discoideum OX=44689 GN=DDB	G0275149 PE=2 SV=1
TRINITY_DN15409_c3_g1_i1	0	0	0	0	0	0	0	0	0	0	0	0	0	0	0	0	0	0	0	0	0	0	0	0	0	0	0	0	0	0	0		ZDHC6	BOVINPalmitoyltransferase ZDHHC6 OS=Bos taurus OX=9913 GN=ZDHHC6 PE=2 SV=1
TRINITY_DN30065_c1_g2_i1	0	0	0	0	0	0	0	0	0	0	0	0	0	0	13	0	0	0	0	0	0	0	0	0	0	0	0	0	0	0	0		ZDHC6	BOVINPalmitoyltransferase ZDHHC6 OS=Bos taurus OX=9913 GN=ZDHHC6 PE=2 SV=1
TRINITY_DN2478_c0_g1_i3	0	0	0	4.6	0	0	1.89	0	0	0	0	0	0	0	0	0	0	0	0	0	0	0	0	0	0	2.72	0	0	0	0	6.23		ZDHC5	MOUSEPalmitoyltransferase ZDHHC5 OS=Mus musculus OX=10090 GN=Zdhhc5 PE=1 SV=1
TRINITY_DN2478_c0_g1_i10	0	4.9	5.65	4.15	0	0	5.38	2.84	0	0	3.76	0	7.73	2.77	0	0	0	0	0	0	0	1.74	1.45	3.39	0	0	1.84	0	5.83	4.9	4.03		ZDHC5	MOUSEPalmitoyltransferase ZDHHC5 OS=Mus musculus OX=10090 GN=Zdhhc5 PE=1 SV=1
TRINITY_DN2478_c0_g1_i17	5.17	4.13	5.59	11.26	3.24	6.05	26.12	0	1.56	0	5.81	9.52	0	12.16	0	2.7	0	0	4.73	0	0	0	4.84	10.57	0	0	11.46	3.03	6.27	10.68	26.24		ZDHC5	MOUSEPalmitoyltransferase ZDHHC5 OS=Mus musculus OX=10090 GN=Zdhhc5 PE=1 SV=1
TRINITY_DN2478_c0_g1_i13	34.72	21.53	39.03	80.47	2.1	26.8	60.16	14.04	11.51	9.81	31.74	7.64	38.07	29.69	7	2.83	0	0	54.84	15.72	5.92	22.69	0	46.25	23.46	27.26	22.82	4.75	29.21	12.59	18.94		ZDHC5	MOUSEPalmitoyltransferase ZDHHC5 OS=Mus musculus OX=10090 GN=Zdhhc5 PE=1 SV=1
TRINITY_DN2478_c0_g1_i30	21.26	32.84	33.45	9.2	64.11	37.65	0	26.83	62.01	36.61	1.93	16.34	35.43	0	0	80.81	12.68	11	47.23	47.5	22.89	34.54	59.71	0	32.31	33.3	36.41	76.14	32.63	29.83	25.65		ZDHC5	MOUSEPalmitoyltransferase ZDHHC5 OS=Mus musculus OX=10090 GN=Zdhhc5 PE=1 SV=1
TRINITY_DN2478_c0_g1_i22	0	0	0	0	0	0	0	0	0	0	0	0	0	0	0	0	0	0	0	0	0	0	0	1	0	0	0	0	0	0	0		ZDHC5	HUMANPalmitoyltransferase ZDHHC5 OS=Homo sapiens OX=9606 GN=ZDHHC5 PE=1 SV=2
TRINITY_DN2478_c0_g1_i18	0	0	0	0	0	1.77	0	0	0	0	4.43	0	5.49	0	0	0	0	0	12.21	2.93	0	1.8	4.33	0	0	4.05	8.1	0	5.6	0	12.24		ZDHC5	HUMANPalmitoyltransferase ZDHHC5 OS=Homo sapiens OX=9606 GN=ZDHHC5 PE=1 SV=2
TRINITY_DN2478_c0_g1_i5	0	1	1	0	1	0	3	1	0	0	0	0	0	0	0	0	0	0	4	0	0	0	0	0	1	0	0	2	0	0	0		ZDHC5	HUMANPalmitoyltransferase ZDHHC5 OS=Homo sapiens OX=9606 GN=ZDHHC5 PE=1 SV=2
TRINITY_DN2478_c0_g1_i14	0	0	0	0	0	0	0	0	0	11.45	17.34	2.99	16.12	0	0	0	0	0	0	3.97	0	4.82	0	10.8	5.48	4.65	0	0	8.81	0	11.29		ZDHC5	HUMANPalmitoyltransferase ZDHHC5 OS=Homo sapiens OX=9606 GN=ZDHHC5 PE=1 SV=2
TRINITY_DN106567_c0_g1_i1	0	0	0	0	0	0	0	0	0	0	0	0	0	0	13	0	0	0	0	0	0	0	0	0	0	0	0	0	0	0	0		ZDHC5	CANLFPalmitoyltransferase ZDHHC5 OS=Canis lupus familiaris OX=9615 GN=ZDHHC5 PE=2 SV=1
TRINITY_DN46267_c1_g1_i1	0	0	0	0	0	0	0	0	0	0	0	0	0	0	41	0	0	0	0	0	0	0	0	0	0	0	0	0	0	0	0		ZDHC3	MOUSEPalmitoyltransferase ZDHHC3 OS=Mus musculus OX=10090 GN=Zdhhc3 PE=1 SV=1
TRINITY_DN12747_c0_g1_i1	10.89	5	25	6	13	15	7	9	12	4	7	10	27.5	8.09	0	16.98	10.75	3	24.62	22	8	15.56	13	19.53	17	13.35	9.89	25	14.19	1	2		ZDHC3	MOUSEPalmitoyltransferase ZDHHC3 OS=Mus musculus OX=10090 GN=Zdhhc3 PE=1 SV=1
TRINITY_DN95917_c0_g1_i1	0	0	0	0	0	0	0	0	0	0	0	0	0	0	13	0	0	0	0	0	0	0	0	0	0	0	0	0	0	0	0		ZDHC3	MOUSEPalmitoyltransferase ZDHHC3 OS=Mus musculus OX=10090 GN=Zdhhc3 PE=1 SV=1
TRINITY_DN13595_c0_g1_i2	0	0.43	5.31	0	5.64	0	4.97	0	0.01	0.91	0	6.07	0	0	1	12.49	2.8	6	0	0.79	0	0	0	6.77	7.56	13.7	0	5.8	4.3	2	5.06		ZDHC3	HUMANPalmitoyltransferase ZDHHC3 OS=Homo sapiens OX=9606 GN=ZDHHC3 PE=1 SV=2
TRINITY_DN13595_c0_g1_i1	12	9.57	23.69	20	11.36	17	14.03	21	18.99	14.09	15	13.93	34	18	0	14.51	8.2	0	30	14.21	11	24	35	27.23	6.44	11.3	23	17.2	25.7	0	4.94		ZDHC3	HUMANPalmitoyltransferase ZDHHC3 OS=Homo sapiens OX=9606 GN=ZDHHC3 PE=1 SV=2
TRINITY_DN124_c1_g1_i19	0	0	0	2.03	0	0	0	0	0	0	0	0	1.21	1.57	0	0	0	0	0	0	3.96	1.21	0	3.85	1.21	1.13	0	0	0	2.49	0		ZDHC2	MOUSEPalmitoyltransferase ZDHHC2 OS=Mus musculus OX=10090 GN=Zdhhc2 PE=2 SV=1
TRINITY_DN124_c1_g1_i6	0	0	0	5.14	0	3.42	0	0	0	0	3.96	0	0	0	0	5.54	0	0	0	0	0	0	0	0	0.47	0	0	0	0	0	0		ZDHC2	HUMANPalmitoyltransferase ZDHHC2 OS=Homo sapiens OX=9606 GN=ZDHHC2 PE=1 SV=1
TRINITY_DN124_c1_g1_i15	0	0	2.51	1	2.41	0	0	0	6.4	2.43	5.18	0	0	2.94	2	0	0	0	2.82	2.42	0	0	0	0	2.22	0	0	3.94	6.78	5.93	5.62		ZDHC2	HUMANPalmitoyltransferase ZDHHC2 OS=Homo sapiens OX=9606 GN=ZDHHC2 PE=1 SV=1
TRINITY_DN124_c1_g1_i29	0	0	0	0	0	0	0	0	0	1.79	0	0	3.2	0	0	0	0	0	0	0	0	0	3.43	0	0	0	0	0.46	0	0	0		ZDHC2	HUMANPalmitoyltransferase ZDHHC2 OS=Homo sapiens OX=9606 GN=ZDHHC2 PE=1 SV=1
TRINITY_DN50388_c0_g3_i1	0	0	0	0	0	0	0	0	0	0	0	0	0	0	4.8	0	0	0	0	0	0	0	0	0	0	0	0	0	0	0	0		ZDHC2	ARATHProbable protein S-acyltransferase 23 OS=Arabidopsis thaliana OX=3702 GN=PAT23 PE=2 SV=2
TRINITY_DN1775_c0_g1_i10	0	0	0	0	0	0	15.73	13.11	0	0	0	4.02	12.18	0	0	0	0	0	0	0	0	0	0	9.63	0	0	0	0	8.28	0	0		ZDHC1	MOUSEProbable palmitoyltransferase ZDHHC1 OS=Mus musculus OX=10090 GN=Zdhhc1 PE=2 SV=2
TRINITY_DN1775_c0_g1_i12	0	0	26.67	54.09	0	0	3.49	8.04	36.85	0	0	0	49.8	88.89	0	0	7.12	0	0	42.02	35.81	0	0	75.09	0	48.52	0	27.65	21.64	2.68	19.18		ZDHC1	MOUSEProbable palmitoyltransferase ZDHHC1 OS=Mus musculus OX=10090 GN=Zdhhc1 PE=2 SV=2
TRINITY_DN128322_c0_g1_i1	0	0	0	0	0	0	0	0	0	0	0	0	0	0	2	0	0	0	0	0	0	0	0	0	0	0	0	0	0	0	0		ZDHC1	MOUSEProbable palmitoyltransferase ZDHHC1 OS=Mus musculus OX=10090 GN=Zdhhc1 PE=2 SV=2
TRINITY_DN1775_c0_g1_i21	0	0	21.81	26.69	22.37	0	27.55	3.26	18.57	28.43	0	18.81	27.25	32.27	0	23.07	6.41	0	0	24.6	17.27	0	0	0	0	83.7	0	29.96	18.28	10.16	8.85		ZDHC1	MOUSEProbable palmitoyltransferase ZDHHC1 OS=Mus musculus OX=10090 GN=Zdhhc1 PE=2 SV=2
TRINITY_DN1775_c0_g1_i22	0	0	0	0	10.35	0	0	0	11.15	0	0	10.58	36.85	0	5.85	14.48	0	8.2	0	11.88	10.3	0	0	0	0	12.81	0	0	29.17	7.94	0		ZDHC1	MOUSEProbable palmitoyltransferase ZDHHC1 OS=Mus musculus OX=10090 GN=Zdhhc1 PE=2 SV=2
TRINITY_DN1775_c0_g1_i5	14.8	18.69	7.9	0	9.53	70.01	24.96	35.77	0	6.6	32.14	11.27	21	78.8	0	38.63	11.37	0	75.81	0	0	166	97.15	28.22	70.61	0	60.6	11.08	0	0	0		ZDHC1	MOUSEProbable palmitoyltransferase ZDHHC1 OS=Mus musculus OX=10090 GN=Zdhhc1 PE=2 SV=2
TRINITY_DN64219_c0_g1_i1	0	0	0	0	0	0	0	0	0	0	0	0	0	0	12	0	0	0	0	0	0	0	0	0	0	0	0	0	0	0	0		ZDH24	RATProbable palmitoyltransferase ZDHHC24 OS=Rattus norvegicus OX=10116 GN=Zdhhc24 PE=2 SV=1
TRINITY_DN68300_c0_g1_i1	0	0	0	1	0	0	0	0	0	0	2	0	0	1	0	0	0	0	0	0	0	0	0	0	0	0	0	0	0	0	0		ZDH23	ARATHProbable protein S-acyltransferase 6 OS=Arabidopsis thaliana OX=3702 GN=PAT06 PE=2 SV=1
TRINITY_DN4254_c0_g2_i56	0	0	0	0	0	0	0	0	0	0	8.08	0	0	0	0	0	0	0	0	0	0	4.53	0	0	0	6.85	0	0	0	0	0		ZDH22	ARATHProtein S-acyltransferase 24 OS=Arabidopsis thaliana OX=3702 GN=PAT24 PE=2 SV=1
TRINITY_DN4254_c0_g2_i32	0	0	0.77	5.68	2.94	3.3	4.94	3.07	4.64	0	9.53	0	0	6.53	0	0	0	0	12.03	0	6.6	0	0	2.14	6.82	4.49	3.62	10.44	0	0	0		ZDH22	ARATHProtein S-acyltransferase 24 OS=Arabidopsis thaliana OX=3702 GN=PAT24 PE=2 SV=1
TRINITY_DN124_c1_g1_i13	0	0	0.33	0	0	2.58	0	0	2.11	0	1.96	0	6.18	0.23	0	1.06	1.07	0	0	0	1.34	4.4	0.92	0.39	0	0	0	0	0	0.93	0		ZDH20	MOUSEPalmitoyltransferase ZDHHC20 OS=Mus musculus OX=10090 GN=Zdhhc20 PE=1 SV=1
TRINITY_DN124_c1_g1_i25	0	0	8.83	3.73	0	0	7.97	0	0	0	0	0	15.03	0	0	0	4.35	6	15.69	16.1	0	0	7.24	0	0	0	0	0	0	0	0		ZDH20	BOVINPalmitoyltransferase ZDHHC20 OS=Bos taurus OX=9913 GN=ZDHHC20 PE=2 SV=1
TRINITY_DN124_c1_g1_i4	1.59	2.19	7.45	0	2.05	0	0	0	0	4.92	0	3.21	0	2.83	0	0	2.21	0	0	0	2.06	0	2	2.2	0	3.65	4.1	1.88	4	0	4.26		ZDH20	BOVINPalmitoyltransferase ZDHHC20 OS=Bos taurus OX=9913 GN=ZDHHC20 PE=2 SV=1
TRINITY_DN124_c1_g1_i8	0	4.8	3.27	7.83	0	0	0	4.85	0	8.36	5.94	5.58	0	0	0	0	0	0	0	0	0	0	4.88	0	0	0	0	7.1	0	2.65	10.12		ZDH20	BOVINPalmitoyltransferase ZDHHC20 OS=Bos taurus OX=9913 GN=ZDHHC20 PE=2 SV=1
TRINITY_DN124_c1_g1_i3	19.41	22.9	25.61	28.27	30.53	13.92	27.03	19.15	25.49	9.61	15.02	5.21	53.38	42.38	0	22.87	9.37	0	18.65	23.47	22.63	27.35	31.03	38.3	32.86	35.72	24.76	14.48	28.22	0	0		ZDH20	BOVINPalmitoyltransferase ZDHHC20 OS=Bos taurus OX=9913 GN=ZDHHC20 PE=2 SV=1
TRINITY_DN14853_c0_g1_i1	5	11	12	12	10	13	5	4	5	5	4	5	20	5	1	9	0	4	7	4	8	4	7	3	7	3	7	12	6	4	1		ZDH19	ARATHProtein S-acyltransferase 8 OS=Arabidopsis thaliana OX=3702 GN=PAT08 PE=1 SV=2
TRINITY_DN1251_c0_g1_i142	3.01	0	3.14	0	0.1	0	3.65	1.7	0	3.79	0.28	0	0	4.11	0	4.02	0	0	6.17	2.5	0	13	7.02	7.46	2.62	0	2.37	0	0	0	0		ZDH18	MOUSEPalmitoyltransferase ZDHHC18 OS=Mus musculus OX=10090 GN=Zdhhc18 PE=1 SV=4
TRINITY_DN12747_c0_g1_i3	1.11	0	0	0	0	0	0	0	0	0	0	0	1.5	2.91	0	2.02	1.25	0	1.38	0	0	2.44	0	2.47	0	1.65	3.11	0	1.81	0	0		ZDH18	ARATHProbable protein S-acyltransferase 13 OS=Arabidopsis thaliana OX=3702 GN=PAT13 PE=2 SV=1
TRINITY_DN3784_c1_g1_i50	7.46	3.52	0	17.19	12.94	4.82	10.04	4.56	2.94	5.29	20.6	0	22.97	31.06	0	9.06	2.69	0	24.87	5.4	17.29	26.42	46.05	17.22	6.79	7.96	8.39	6.9	28.28	4.64	29.95		ZDH17	RATPalmitoyltransferase ZDHHC17 OS=Rattus norvegicus OX=10116 GN=Zdhhc17 PE=1 SV=1
TRINITY_DN4254_c0_g2_i41	1.14	0	2.27	3.43	0	0	2.1	0	3.12	1.33	0	1.07	2.05	1.67	0	5.82	0	0	0	5.71	3.19	0	3.63	0	0	1.42	0	0	1.5	0	0		ZDH17	RATPalmitoyltransferase ZDHHC17 OS=Rattus norvegicus OX=10116 GN=Zdhhc17 PE=1 SV=1
TRINITY_DN3784_c1_g1_i9	0	3.11	0	0	0	0	4.25	0	3.69	1.76	1.86	0	0	0	0	0	0	3.21	0	0	0	2.24	6.32	0	0	4.07	0	1.5	3.25	0	1.75		ZDH17	RATPalmitoyltransferase ZDHHC17 OS=Rattus norvegicus OX=10116 GN=Zdhhc17 PE=1 SV=1
TRINITY_DN13652_c0_g1_i18	1	0	0	0	0	0	0	0	0	0	0	0	0	0	0	0	0	0	0	0	1	0	0	0	0	0	0	0	0	0	0		ZDH17	RATPalmitoyltransferase ZDHHC17 OS=Rattus norvegicus OX=10116 GN=Zdhhc17 PE=1 SV=1
TRINITY_DN1130_c0_g1_i10	0	5.68	0	0	6	2.51	10.07	0	15	6.23	6.65	0	0	11.86	0	0	0	0	0	0	11.06	2.21	0	17.83	9.54	3.38	0	5.48	3.25	0	0		ZDH17	HUMANPalmitoyltransferase ZDHHC17 OS=Homo sapiens OX=9606 GN=ZDHHC17 PE=1 SV=2
TRINITY_DN1130_c0_g1_i6	1.61	4	6.99	4.8	0	0	0	19.19	0	3.59	0	8	15.22	5.26	0	10.46	4.53	0	10.84	8.01	3.12	14.35	12.32	8.91	0	7.95	14	7.71	9.75	5.01	0		ZDH17	HUMANPalmitoyltransferase ZDHHC17 OS=Homo sapiens OX=9606 GN=ZDHHC17 PE=1 SV=2
TRINITY_DN1251_c0_g1_i124	72.26	33.94	82.88	0	0	0	0	0	29.4	0	31.14	27.45	0	0	0	0	0	0	0	0	0	41.45	0	0	0	0	58.64	0	0	0	0		ZDH14	MOUSEProbable palmitoyltransferase ZDHHC14 OS=Mus musculus OX=10090 GN=Zdhhc14 PE=1 SV=1
TRINITY_DN54015_c0_g2_i1	0	0	0	0	0	0	0	0	0	0	0	0	0	0	3	0	0	0	0	0	0	0	0	0	0	0	0	0	0	0	0		ZDH14	MOUSEProbable palmitoyltransferase ZDHHC14 OS=Mus musculus OX=10090 GN=Zdhhc14 PE=1 SV=1
TRINITY_DN103169_c0_g1_i1	0	0	0	0	0	0	0	0	0	0	3	0	0	0	0	0	0	0	0	0	0	0	0	0	0	0	0	0	0	0	0		ZDH14	MOUSEProbable palmitoyltransferase ZDHHC14 OS=Mus musculus OX=10090 GN=Zdhhc14 PE=1 SV=1
TRINITY_DN1251_c0_g1_i111	24.96	30.57	0	0	0	39.38	0	0	0	0	0	0	0	51.89	0	0	0	0	20.57	0	0	25.94	42.01	0	25.97	21.34	0	34.88	25.97	0	0		ZDH14	MOUSEProbable palmitoyltransferase ZDHHC14 OS=Mus musculus OX=10090 GN=Zdhhc14 PE=1 SV=1
TRINITY_DN1251_c0_g1_i1	7.69	5.47	7.75	1.54	7.18	7.45	4.89	0	6.67	0.47	1.61	2.62	9.27	0	0	5.98	0	1.63	0.7	6.12	0	0	0	1.4	2.92	10.76	0	7.2	4.91	8.14	6.94		ZDH14	HUMANProbable palmitoyltransferase ZDHHC14 OS=Homo sapiens OX=9606 GN=ZDHHC14 PE=1 SV=1
TRINITY_DN54015_c0_g1_i1	0	0	0	0	0	0	0	0	0	0	0	0	0	0	25	0	0	0	0	0	0	0	0	0	0	0	0	0	0	0	0		ZDH14	HUMANProbable palmitoyltransferase ZDHHC14 OS=Homo sapiens OX=9606 GN=ZDHHC14 PE=1 SV=1
TRINITY_DN75343_c0_g1_i1	0	0	0	0	0	0	0	0	0	0	0	0	0	0	3	0	0	0	0	0	0	0	0	0	0	0	0	0	0	0	0		ZDH14	ARATHProbable protein S-acyltransferase 14 OS=Arabidopsis thaliana OX=3702 GN=PAT14 PE=2 SV=1
TRINITY_DN11166_c0_g1_i3	0	1	2	0	0	0	0	0	0	0	0	1.02	0	0	0	0	0	0	0	0	2.06	0	0	0	3.23	0	0	0	1	0	0		ZDH13	MOUSEPalmitoyltransferase ZDHHC13 OS=Mus musculus OX=10090 GN=Zdhhc13 PE=1 SV=2
TRINITY_DN58554_c0_g1_i7	0	0	0	0	0	0	0	0	0	0	0	0	1	0	0	0	0	0	0	0	0	0	0	0	0	5	0	0	0	0	1		ZDH13	MOUSEPalmitoyltransferase ZDHHC13 OS=Mus musculus OX=10090 GN=Zdhhc13 PE=1 SV=2
TRINITY_DN138401_c0_g1_i1	1	0	0	0	0	0	0	2	0	0	0	1	1	0	0	0	1	0	1	0	0	2	1	2	0	1	1	0	0	0	1		ZDH13	MOUSEPalmitoyltransferase ZDHHC13 OS=Mus musculus OX=10090 GN=Zdhhc13 PE=1 SV=2
TRINITY_DN21094_c0_g1_i4	3	1	0	0	0	0	0	0	0	0	0	0	0	0	0	1	0	0	0	0	0	0	0	0	2	4	0	0	0	0	0		ZDH13	MOUSEPalmitoyltransferase ZDHHC13 OS=Mus musculus OX=10090 GN=Zdhhc13 PE=1 SV=2
TRINITY_DN11166_c0_g1_i8	0	0	0	0	0	0	0	0	0	0	0	0	2	0	0	0	0	0	0	0	0	1	0	0	0	0	0	0	0	0	0		ZDH13	MOUSEPalmitoyltransferase ZDHHC13 OS=Mus musculus OX=10090 GN=Zdhhc13 PE=1 SV=2
TRINITY_DN11166_c0_g1_i11	4.93	2	0	0	1.01	3.04	1.63	1	0	3.99	1	1.05	0	0	0	0	1	0	0	1	0	0	2	1	0	1.46	2.29	0	1.79	1	0		ZDH13	MACFAPalmitoyltransferase ZDHHC13 OS=Macaca fascicularis OX=9541 GN=ZDHHC13 PE=2 SV=1
TRINITY_DN9919_c0_g1_i17	0	0	0.96	1	0	0	0	0	0	0	3.37	2.45	8.63	0	0	1.11	1	0.4	3	0	1.98	2.39	4.23	3.48	2.47	3.46	0	0	0	3.15	4.09		ZDH13	MACFAPalmitoyltransferase ZDHHC13 OS=Macaca fascicularis OX=9541 GN=ZDHHC13 PE=2 SV=1
TRINITY_DN22698_c1_g1_i10	0	0	0	0	0	0	0	0	0	0	0	0	0	0	0	0	0	0	0	0	0	0	0	0	0	0	0	2	0	0	0		ZDH13	HUMANPalmitoyltransferase ZDHHC13 OS=Homo sapiens OX=9606 GN=ZDHHC13 PE=1 SV=3
TRINITY_DN18871_c0_g3_i1	0	0	1	0	0	0	0	0	0	0	0	0	0	0	0	0	0	0	0	0	0	0	0	0	0	1	0	0	0	0	1		ZDH13	HUMANPalmitoyltransferase ZDHHC13 OS=Homo sapiens OX=9606 GN=ZDHHC13 PE=1 SV=3
TRINITY_DN22698_c1_g1_i4	0	0	0	0	0	0	0	0	0	0	0	1	1	0	0	1	0	0	1	0	0	0	0	0	1	1	0	0	0	0	1		ZDH13	HUMANPalmitoyltransferase ZDHHC13 OS=Homo sapiens OX=9606 GN=ZDHHC13 PE=1 SV=3
TRINITY_DN22698_c1_g1_i7	0	0	0	0	0	0	0	0	1	1	1	0	0	0	0	0	0	0	0	0	0	0	0	1	0	2	0	0	0	0	0		ZDH13	HUMANPalmitoyltransferase ZDHHC13 OS=Homo sapiens OX=9606 GN=ZDHHC13 PE=1 SV=3
TRINITY_DN1464_c0_g1_i15	0	0	0	0.15	0	2.72	1.45	2.23	2.86	2.29	0.4	3.2	10.4	4	0	1	2	0	0	1.41	0	1.53	0	0	2.61	1.12	0	1.38	3.77	0	2.55		ZDH12	RATProbable palmitoyltransferase ZDHHC12 OS=Rattus norvegicus OX=10116 GN=Zdhhc12 PE=2 SV=1
TRINITY_DN1464_c0_g1_i12	0	0	0	0	3	0	0	0	0	0	0	0	0	0	0	0	0	0	0	0	0	0	2.84	0	0	0	0	0	0	0	0		ZDH12	RATProbable palmitoyltransferase ZDHHC12 OS=Rattus norvegicus OX=10116 GN=Zdhhc12 PE=2 SV=1
TRINITY_DN22_c0_g1_i12	0	0	0	92.1	0	0	64	0	135.95	0	54.54	59	174	31.2	9	72	51	5.11	90.37	0	0	5.52	70.74	0	129	92.67	163.18	16.54	63	2.93	9.17		ZD16A	DANREPalmitoyltransferase ZDHHC16A OS=Danio rerio OX=7955 GN=zdhhc16a PE=2 SV=1
TRINITY_DN122726_c0_g1_i1	0	0	0	0	0	0	0	0	0	0	0	0	0	0	19	0	0	0	0	0	0	0	0	0	0	0	0	0	0	0	0		ZD16A	DANREPalmitoyltransferase ZDHHC16A OS=Danio rerio OX=7955 GN=zdhhc16a PE=2 SV=1
TRINITY_DN22_c0_g1_i11	0	0	35.7	12.88	0	0	0	0	11.05	0	17.65	0	0	17.66	0	0	0	0	15.07	0	16.39	94.95	45.26	0	0	0	17.82	9.88	0	0	0		ZD16A	DANREPalmitoyltransferase ZDHHC16A OS=Danio rerio OX=7955 GN=zdhhc16a PE=2 SV=1
TRINITY_DN22_c0_g1_i22	50.21	44	38.3	0	65	67	0	66	0	61	9.81	0	0	76.14	0	72	0	5.11	0	58	19.61	5.52	0	143.52	0	46.33	0	16.54	0	2.93	9.17		ZD16A	DANREPalmitoyltransferase ZDHHC16A OS=Danio rerio OX=7955 GN=zdhhc16a PE=2 SV=1
TRINITY_DN91413_c0_g1_i1	4	0	1	2	0	2	2	0	1	0	1	0	8	7	0	0	5	0	2	2	0	5	4	1	0	0	1	0	1	2	4		ZCRB1	HUMANZinc finger CCHC-type and RNA-binding motif-containing protein 1 OS=Homo sapiens OX=9606 GN=ZCRB1 PE=1 SV=2
TRINITY_DN87192_c0_g1_i1	0	0	0	0	0	0	0	0	0	0	0	0	0	0	4	0	0	0	0	0	0	0	0	0	0	0	0	0	0	0	0		ZCRB1	BOVINZinc finger CCHC-type and RNA-binding motif-containing protein 1 OS=Bos taurus OX=9913 GN=ZCRB1 PE=2 SV=1
TRINITY_DN5064_c0_g1_i6	0	0	0	0	0	0	0	0	0	0	9.37	8.28	0	74.69	0	0	0	0	0	0	2.28	0	48.5	0	0	0	2	0	1.5	0	0		ZCPW1	MOUSEZinc finger CW-type PWWP domain protein 1 OS=Mus musculus OX=10090 GN=Zcwpw1 PE=1 SV=2
TRINITY_DN5064_c0_g1_i3	4.59	0	7	0	2.14	0	2.94	0	8	0	0	84.72	221	73.96	0	9	6	0	3.93	17.14	72.3	116	48.5	0	12	3.32	0	5	1.5	0	0		ZCPW1	MOUSEZinc finger CW-type PWWP domain protein 1 OS=Mus musculus OX=10090 GN=Zcwpw1 PE=1 SV=2
TRINITY_DN5064_c0_g1_i2	0	0	0	5.88	1.86	1.95	0	3.82	0	0	0	0	0	101.55	0	0	0	2	3.07	15.96	17.5	0	0	0	0	7.68	0	0	0	0	0		ZCPW1	MOUSEZinc finger CW-type PWWP domain protein 1 OS=Mus musculus OX=10090 GN=Zcwpw1 PE=1 SV=2
TRINITY_DN5064_c0_g1_i5	1	1	0	0	0	4.28	1.06	3.18	0	0	6.73	0	0	30.8	0	0	0	0	1	10.9	42.92	0	0	5	0	0	0	0	0	0	0		ZCPW1	MOUSEZinc finger CW-type PWWP domain protein 1 OS=Mus musculus OX=10090 GN=Zcwpw1 PE=1 SV=2
TRINITY_DN428_c0_g1_i12	0	0	0	0	0	0	14.13	0	0	0	0	0	0	0	0	0	0	0	0	0	0	0	0	0	10.05	0	0	0	0	0	8.11		ZCHC9	HUMANZinc finger CCHC domain-containing protein 9 OS=Homo sapiens OX=9606 GN=ZCCHC9 PE=1 SV=2
TRINITY_DN428_c0_g1_i4	0	0	0	0	0	0	0	0	2.77	3.68	0	0	4.86	4.5	0	0	2.27	0	0	0	5.36	0	0	0	0	0	8.76	2.32	0	0	0		ZCHC9	HUMANZinc finger CCHC domain-containing protein 9 OS=Homo sapiens OX=9606 GN=ZCCHC9 PE=1 SV=2
TRINITY_DN64824_c0_g1_i1	0	0	0	0	0	0	0	0	0	0	0	0	0	0	2	0	0	0	0	0	0	0	0	0	0	0	0	0	0	0	0		ZCHC9	HUMANZinc finger CCHC domain-containing protein 9 OS=Homo sapiens OX=9606 GN=ZCCHC9 PE=1 SV=2
TRINITY_DN428_c0_g1_i8	0	9.98	59.47	32.25	14.32	48.44	21.12	0	26.89	4.38	0	21.52	22.76	34.98	0	45.16	0	14	65.99	29.91	18.26	0	0	0	16.21	0	35.29	37.44	0	0	0		ZCHC9	HUMANZinc finger CCHC domain-containing protein 9 OS=Homo sapiens OX=9606 GN=ZCCHC9 PE=1 SV=2
TRINITY_DN428_c0_g1_i20	43.43	22.63	0	41.59	29.12	0	0	33.93	17.8	12.71	31.47	0	57.51	23.81	1	0	39.4	0	0	23.09	8.02	66.22	33.2	45.9	11.61	34.94	0	0	35.95	4.12	14.36		ZCHC9	HUMANZinc finger CCHC domain-containing protein 9 OS=Homo sapiens OX=9606 GN=ZCCHC9 PE=1 SV=2
TRINITY_DN124664_c0_g1_i1	0	0	0	0	0	0	0	0	0	0	0	0	0	0	15	0	0	0	0	0	0	0	0	0	0	0	0	0	0	0	0		ZCHC7	XENLAZinc finger CCHC domain-containing protein 7 OS=Xenopus laevis OX=8355 GN=zcchc7 PE=2 SV=2
TRINITY_DN14087_c0_g1_i17	0	0	5.21	5.81	0	0	0	0	0	0	0	0	7.28	2.25	0	7.27	0	0	3.88	0	0	0	0	0	0	7.74	3.33	0	0	5	2.28		ZCHC4	RATrRNA N6-adenosine-methyltransferase ZCCHC4 OS=Rattus norvegicus OX=10116 GN=Zcchc4 PE=3 SV=1
TRINITY_DN14087_c0_g1_i2	6.01	0	0	0	1.75	2.39	0	5.06	0	0	0	0	0	0	0	0	0	0	0	0	0	0	0	0	0	5.05	0	0	0	0	2.87		ZCHC4	RATrRNA N6-adenosine-methyltransferase ZCCHC4 OS=Rattus norvegicus OX=10116 GN=Zcchc4 PE=3 SV=1
TRINITY_DN14087_c0_g1_i9	4.07	5.56	0	0	0	0	0	0	0	0	0	0	0	4.44	0	4.48	0	0	5.65	0	0	0	0	0	0	0	3.67	0	0	0	0		ZCHC4	RATrRNA N6-adenosine-methyltransferase ZCCHC4 OS=Rattus norvegicus OX=10116 GN=Zcchc4 PE=3 SV=1
TRINITY_DN14087_c0_g1_i16	0	0	0	0	0	3.53	0	0	2.61	0	1.24	1.78	0	0	0	0	0	0.34	0	0	0	0.56	0	11.29	4.83	0	0	0	2.44	0	0		ZCHC4	RATrRNA N6-adenosine-methyltransferase ZCCHC4 OS=Rattus norvegicus OX=10116 GN=Zcchc4 PE=3 SV=1
TRINITY_DN124218_c0_g1_i1	0	0	0	0	0	0	0	0	0	0	0	0	0	0	2	0	0	0	0	0	0	0	0	0	0	0	0	0	0	0	0		ZCHC4	MOUSErRNA N6-adenosine-methyltransferase ZCCHC4 OS=Mus musculus OX=10090 GN=Zcchc4 PE=2 SV=1
TRINITY_DN14087_c0_g1_i14	0	2.67	4.61	1.08	0	1.35	0	3.34	0	0	0	0	0	0	0	0	0	0	0	0	2.24	3	1.54	2.2	0	0	1.78	0	0	0	1		ZCHC4	HUMANrRNA N6-adenosine-methyltransferase ZCCHC4 OS=Homo sapiens OX=9606 GN=ZCCHC4 PE=1 SV=3
TRINITY_DN14087_c0_g1_i1	0	6.56	0	0	0	0	0	0	0	0	0	0	0	5.37	0	0	0	0	9.61	0	0	0	0	0	0	0	0	0	0	0	0		ZCHC4	HUMANrRNA N6-adenosine-methyltransferase ZCCHC4 OS=Homo sapiens OX=9606 GN=ZCCHC4 PE=1 SV=3
TRINITY_DN14087_c0_g1_i15	21.91	12.22	45.18	28.11	22.25	34.73	26	15.6	28.39	32	12.76	6.22	117.72	30.94	3	44.25	14	8.66	15.85	31	16.76	21.44	10.46	22.51	24.17	17.2	11.21	20	10.56	0	2.86		ZCHC4	HUMANrRNA N6-adenosine-methyltransferase ZCCHC4 OS=Homo sapiens OX=9606 GN=ZCCHC4 PE=1 SV=3
TRINITY_DN10245_c0_g1_i5	0	0	0	0	0	0	0	0	0	0	0	0	0	0	27.78	0	0	0	0	0	0	0	0	0	0	0	0	0	0	0	0		ZCH24	HUMANZinc finger CCHC domain-containing protein 24 OS=Homo sapiens OX=9606 GN=ZCCHC24 PE=1 SV=1
TRINITY_DN40282_c0_g1_i1	0	0	0	0	0	0	0	0	0	0	0	0	0	0	23.31	0	0	0	0	0	0	0	0	0	0	0	0	0	0	0	0		ZCH24	HUMANZinc finger CCHC domain-containing protein 24 OS=Homo sapiens OX=9606 GN=ZCCHC24 PE=1 SV=1
TRINITY_DN46715_c0_g1_i2	0	0	0	0	0	0	0	0	0	0	0	0	0	0	26	0	0	0	0	0	0	0	0	0	0	0	0	0	0	0	0		ZCH24	HUMANZinc finger CCHC domain-containing protein 24 OS=Homo sapiens OX=9606 GN=ZCCHC24 PE=1 SV=1
TRINITY_DN24460_c0_g1_i1	0	0	0	0	0	0	0	0	0	0	0	0	0	0	54	0	0	0	0	1	0	0	0	0	0	1	0	0	0	0	0		ZCH24	HUMANZinc finger CCHC domain-containing protein 24 OS=Homo sapiens OX=9606 GN=ZCCHC24 PE=1 SV=1
TRINITY_DN128834_c0_g1_i1	0	0	0	0	0	0	0	0	0	0	0	0	0	0	2	0	0	0	0	0	0	0	0	0	0	0	0	0	0	0	0		ZCH10	MOUSEZinc finger CCHC domain-containing protein 10 OS=Mus musculus OX=10090 GN=Zcchc10 PE=2 SV=1
TRINITY_DN36013_c0_g1_i1	0	0	0	0	0	0	0	0	0	0	0	0	0	0	24	0	0	0	0	0	0	0	0	0	0	0	0	0	0	0	0		ZC3HF	HUMANZinc finger CCCH domain-containing protein 15 OS=Homo sapiens OX=9606 GN=ZC3H15 PE=1 SV=1
TRINITY_DN42219_c0_g1_i10	50.06	26.05	92.95	69.25	30.55	94.92	44.57	24.05	61	18.52	13.06	23.72	97.69	58.52	3	68	40.21	18	48.01	57.24	35	85.25	44.69	42.17	18.21	33.02	23.6	22.37	18.33	9.18	16		ZC3HE	DANREZinc finger CCCH domain-containing protein 14 OS=Danio rerio OX=7955 GN=zc3h14 PE=2 SV=1
TRINITY_DN74789_c0_g1_i1	0	0	0	0	0	0	0	0	0	0	0	0	0	0	4	0	0	0	0	0	0	0	0	0	0	0	0	0	0	0	0		ZC3HE	CHICKZinc finger CCCH domain-containing protein 14 OS=Gallus gallus OX=9031 GN=ZC3H14 PE=2 SV=1
TRINITY_DN42219_c0_g1_i3	5.07	4.56	0	0	10.73	0	0	0	0	7.7	1.55	0	5.71	0	0	0	0	0	0	0	0	1.19	0	0	3.82	0	2.26	1.77	2.98	0	0		ZC3HE	CHICKZinc finger CCCH domain-containing protein 14 OS=Gallus gallus OX=9031 GN=ZC3H14 PE=2 SV=1
TRINITY_DN42219_c0_g1_i4	0	0	0	0	0	0	0	0	0	0	2.65	5.75	0	0	0	0	0	0	0	1.76	0	0	0	3.41	0	8.92	3.52	0	2.68	0	0		ZC3HE	CHICKZinc finger CCCH domain-containing protein 14 OS=Gallus gallus OX=9031 GN=ZC3H14 PE=2 SV=1
TRINITY_DN42219_c0_g1_i5	0	0	0	5.8	2.59	1.84	1.43	6.24	0	1.56	1.86	3.74	0	1.48	0	0	0	0	0	0	0	1.56	0	0	0	0	2.61	0	0	0	0		ZC3HE	CHICKZinc finger CCCH domain-containing protein 14 OS=Gallus gallus OX=9031 GN=ZC3H14 PE=2 SV=1
TRINITY_DN42219_c0_g1_i9	8.11	0	4.88	2.25	0	5.23	0	2.7	0	2.23	1.82	2.79	2.6	0	0	0	0	0	0	0	0	0	0	0	3.5	4.06	0	0	0	0	0		ZC3HE	CHICKZinc finger CCCH domain-containing protein 14 OS=Gallus gallus OX=9031 GN=ZC3H14 PE=2 SV=1
TRINITY_DN42219_c0_g1_i2	3.76	3.39	4.18	3.7	4.13	0	0	0	0	0	8.06	0	0	0	0	0	2.79	0	4.99	0	0	0	4.31	3.42	11.47	0	0	4.87	0	7.82	0		ZC3HE	CHICKZinc finger CCCH domain-containing protein 14 OS=Gallus gallus OX=9031 GN=ZC3H14 PE=2 SV=1
TRINITY_DN134120_c0_g1_i2	118	114	93	135	81	77	101	81	109	89	96	70	284	135	7	111	49	22	84	141	77	149	98	135	108	133	83	92	84	25	25		ZC3HA	HUMANZinc finger CCCH domain-containing protein 10 OS=Homo sapiens OX=9606 GN=ZC3H10 PE=1 SV=1
TRINITY_DN51010_c0_g1_i1	0	0	0	0	0	0	0	0	0	0	0	0	0	0	5	0	0	0	0	0	0	0	0	0	0	0	0	0	0	0	0		ZC3HA	HUMANZinc finger CCCH domain-containing protein 10 OS=Homo sapiens OX=9606 GN=ZC3H10 PE=1 SV=1
TRINITY_DN62724_c0_g1_i1	0	0	0	0	0	0	0	0	0	0	0	0	0	0	18	0	0	0	0	0	0	0	0	0	0	0	0	0	0	0	0		ZC3HA	HUMANZinc finger CCCH domain-containing protein 10 OS=Homo sapiens OX=9606 GN=ZC3H10 PE=1 SV=1
TRINITY_DN119547_c0_g1_i1	0	0	0	0	0	0	0	0	0	0	0	0	0	0	5	0	0	0	0	0	0	0	0	0	0	0	0	0	0	0	0		ZC3HA	HUMANZinc finger CCCH domain-containing protein 10 OS=Homo sapiens OX=9606 GN=ZC3H10 PE=1 SV=1
TRINITY_DN133213_c0_g1_i1	0	0	0	0	0	0	0	0	0	0	0	0	0	0	9	0	0	0	0	0	0	0	0	0	0	0	0	0	0	0	0		ZC3HA	HUMANZinc finger CCCH domain-containing protein 10 OS=Homo sapiens OX=9606 GN=ZC3H10 PE=1 SV=1
TRINITY_DN81560_c0_g1_i1	0	0	0	0	0	0	0	0	0	0	0	0	0	0	4	0	0	0	0	0	0	0	0	0	0	0	0	0	0	0	0		ZC3HA	HUMANZinc finger CCCH domain-containing protein 10 OS=Homo sapiens OX=9606 GN=ZC3H10 PE=1 SV=1
TRINITY_DN1740_c0_g1_i14	0	0	0	7.25	0	0	5.31	0	0	0	0	0	0	0	0	0	0	0	0	0	0	0	0	0	0	60.94	0	0	0	0	0		ZC3H8	MOUSEZinc finger CCCH domain-containing protein 8 OS=Mus musculus OX=10090 GN=Zc3h8 PE=1 SV=2
TRINITY_DN1740_c0_g1_i2	21.53	0	0	0	0	8.89	0	0	0	0	0	0	29.48	0	0	0	6.69	0	0	0	0	0	0	0	0	0	15.53	0	0	0	0		ZC3H8	MOUSEZinc finger CCCH domain-containing protein 8 OS=Mus musculus OX=10090 GN=Zc3h8 PE=1 SV=2
TRINITY_DN1740_c0_g1_i18	0	11.79	19.99	21.04	14.49	15.58	0.83	32	39.51	10.53	5.62	22.35	29.54	36.54	0	14.6	24.51	8.86	41.04	28.75	0	45.91	53.62	31.07	46.97	0.86	30.11	11.28	22.95	0	15.49		ZC3H8	MOUSEZinc finger CCCH domain-containing protein 8 OS=Mus musculus OX=10090 GN=Zc3h8 PE=1 SV=2
TRINITY_DN1740_c0_g1_i3	19.38	17.67	22.97	16.28	13.05	18.44	23.27	0	0	0	6.07	0.51	47.55	7.51	1	46.35	7.83	1.56	0	29.72	31	22	0	19.89	0	0	0	39.43	16.14	20	13		ZC3H8	MOUSEZinc finger CCCH domain-containing protein 8 OS=Mus musculus OX=10090 GN=Zc3h8 PE=1 SV=2
TRINITY_DN2004_c1_g1_i8	0	5.88	0	3.18	0	0	0	0	0	0	10.38	6.84	2.03	6.5	0	0	0	0	0	2.87	7.57	0.87	3.6	8.81	0.64	0	0	0	7.71	0.84	6.86		ZC3H3	MOUSEZinc finger CCCH domain-containing protein 3 OS=Mus musculus OX=10090 GN=Zc3h3 PE=1 SV=1
TRINITY_DN78604_c0_g1_i1	0	0	0	0	0	0	0	0	0	0	0	0	0	0	8	0	0	0	0	0	0	0	0	0	0	0	0	0	0	0	0		ZC3H3	MOUSEZinc finger CCCH domain-containing protein 3 OS=Mus musculus OX=10090 GN=Zc3h3 PE=1 SV=1
TRINITY_DN2004_c1_g1_i1	15.12	7.13	5.96	11.67	11.4	1.99	5.41	0.94	11.63	4.08	3.64	4.28	24.19	19.71	1	5.4	8.13	1	8.98	2.37	1	11.7	2.29	16.69	13.48	15.58	17.26	2.84	0	0	5.18		ZC3H3	MOUSEZinc finger CCCH domain-containing protein 3 OS=Mus musculus OX=10090 GN=Zc3h3 PE=1 SV=1
TRINITY_DN2004_c1_g1_i10	0	0	8.59	4.86	0	0	9.08	0	6.52	0	3.35	0	0	0	0	0	0	0	0	0	0	0	0	0	0	0	4.09	0	0	0	0		ZC3H3	MOUSEZinc finger CCCH domain-containing protein 3 OS=Mus musculus OX=10090 GN=Zc3h3 PE=1 SV=1
TRINITY_DN2004_c1_g1_i12	0	4.51	11.93	4.72	0	7.05	0	4.35	0	0	0	2.7	7.88	0	0	7.15	0	0	0	14.89	16.78	0	20.23	0	0	0	0.9	6.68	0	3.12	10.06		ZC3H3	MOUSEZinc finger CCCH domain-containing protein 3 OS=Mus musculus OX=10090 GN=Zc3h3 PE=1 SV=1
TRINITY_DN2004_c1_g1_i6	12.5	8	11.96	9.9	0	0	10.01	6.97	0	0	0	0	7.28	0	0	9.66	0	0	2.67	0	0	0	0	0	0	0	14.85	0	0	3.37	0		ZC3H3	MOUSEZinc finger CCCH domain-containing protein 3 OS=Mus musculus OX=10090 GN=Zc3h3 PE=1 SV=1
TRINITY_DN2004_c1_g1_i4	0	0	0.01	4.72	7.7	0	0	4.36	16.98	0	7.83	2.7	7.88	21.92	0	0	10.55	0	19.79	10.37	0	12.01	0	0	5.88	17.89	0.9	6.68	8.18	3.12	15.69		ZC3H3	MOUSEZinc finger CCCH domain-containing protein 3 OS=Mus musculus OX=10090 GN=Zc3h3 PE=1 SV=1
TRINITY_DN2004_c1_g1_i11	0	1.2	3.44	0	11.43	0	0	5.18	0	9.88	0	1.79	7.01	26.88	0	0	2.33	0	0	0	2.07	8.42	0.87	0	0	0	0	6.81	6.19	0	0.74		ZC3H3	MOUSEZinc finger CCCH domain-containing protein 3 OS=Mus musculus OX=10090 GN=Zc3h3 PE=1 SV=1
TRINITY_DN2004_c1_g1_i3	7.38	0	0	0	0	57.46	22.66	0	0	15.03	14.23	5.07	7.36	0	0	0	0	0	0	0	0	0	0	20.5	0	0	0	0	3.92	0	0		ZC3H3	MOUSEZinc finger CCCH domain-containing protein 3 OS=Mus musculus OX=10090 GN=Zc3h3 PE=1 SV=1
TRINITY_DN608_c1_g1_i37	160.5	114.74	77.06	74.28	44.74	85.23	165.83	164.82	92.59	0	35.06	0	96.73	104.02	0	190	68.08	24.08	163.57	0	0	0	178.82	0	102.91	196.07	0	267.95	0	94.79	114.02		ZC3H1	HUMANZinc finger C3H1 domain-containing protein OS=Homo sapiens OX=9606 GN=ZFC3H1 PE=1 SV=3
TRINITY_DN608_c1_g1_i41	25.54	0	106.46	88.84	39.19	0	0	17.58	0	112.49	24.12	0	165.18	37.35	0	103.89	0	0	274.71	0	80.03	0	0	0	0	0	0	28.04	0	73.72	148.02		ZC3H1	HUMANZinc finger C3H1 domain-containing protein OS=Homo sapiens OX=9606 GN=ZFC3H1 PE=1 SV=3
TRINITY_DN608_c1_g1_i24	30.88	69.64	77.77	15.78	10.13	0	37.41	51.98	27.54	27.33	42.81	29.13	95.12	15.55	0.03	8.36	38.4	0	29.53	14.61	20.62	12.05	33.9	34.66	0	34.96	37.51	19.31	0	36.17	135.93		ZC3H1	HUMANZinc finger C3H1 domain-containing protein OS=Homo sapiens OX=9606 GN=ZFC3H1 PE=1 SV=3
TRINITY_DN608_c1_g1_i45	58.93	0	156.18	0	0	0	0	0	0	71.15	0	0	227.86	131.62	0	0	0	0	47.47	0	61.85	0	0	0	0	0	0	0	0	77.51	67.7		ZC3H1	HUMANZinc finger C3H1 domain-containing protein OS=Homo sapiens OX=9606 GN=ZFC3H1 PE=1 SV=3
TRINITY_DN608_c1_g1_i14	0	0	0.04	33.8	25.44	19.64	14.86	0	0	0	0	9.78	8	42.44	0	10.41	0	0	0	0	0	22.47	19.53	0	43.7	0	29.67	16.12	110.34	35.97	11.94		ZC3H1	HUMANZinc finger C3H1 domain-containing protein OS=Homo sapiens OX=9606 GN=ZFC3H1 PE=1 SV=3
TRINITY_DN608_c1_g1_i3	0	100.32	0	5.81	46.66	70.81	90.86	0	86.65	21.44	116.75	75.62	0	35.63	0	0	0	0	55.06	54.13	0	89.59	84.89	0	0	36.61	91.84	0	0	0	15.6		ZC3H1	HUMANZinc finger C3H1 domain-containing protein OS=Homo sapiens OX=9606 GN=ZFC3H1 PE=1 SV=3
TRINITY_DN608_c1_g1_i13	0	27.87	54.42	123.63	0	52.43	0	0	120.36	0	0	47.32	120.06	73.9	7.61	89.37	52.73	21.93	0	147.24	129.49	151.87	0	150.03	209.28	0	28.93	0	247.76	78.6	0		ZC3H1	HUMANZinc finger C3H1 domain-containing protein OS=Homo sapiens OX=9606 GN=ZFC3H1 PE=1 SV=3
TRINITY_DN55133_c0_g1_i1	0	0	0	0	0	0	0	0	0	0	0	0	0	0	11	0	0	0	0	0	0	0	0	0	0	0	0	0	0	0	0		ZC3H1	HUMANZinc finger C3H1 domain-containing protein OS=Homo sapiens OX=9606 GN=ZFC3H1 PE=1 SV=3
TRINITY_DN608_c1_g1_i6	84.15	115.58	0	176.74	116.08	232.88	61.99	0	75.77	0	49.79	31.17	0	0	2.36	46.86	19.23	7.99	0	112.44	0	56.73	49.32	89.58	28.1	99.36	119.04	28.59	38.76	0	99.77		ZC3H1	HUMANZinc finger C3H1 domain-containing protein OS=Homo sapiens OX=9606 GN=ZFC3H1 PE=1 SV=3
TRINITY_DN84378_c0_g1_i1	0	0	0	0	0	0	0	0	0	0	0	0	0	0	2	0	0	0	0	0	0	0	0	0	0	0	0	0	0	0	0		ZC21B	MOUSEZinc finger C2HC domain-containing protein 1B OS=Mus musculus OX=10090 GN=Zc2hc1b PE=2 SV=1
TRINITY_DN3479_c1_g1_i3	2.28	1.54	0	0	3.14	0	0.01	1.01	0	2.65	5.1	0	2.15	21.43	0	0	1.07	0	0.35	0	0	0	0	2.99	0	0	0.01	0	0.11	2.45	0		ZC21A	XENLAZinc finger C2HC domain-containing protein 1A OS=Xenopus laevis OX=8355 GN=zc2hc1a PE=2 SV=1
TRINITY_DN3479_c1_g1_i5	8.95	0	0.63	9.21	0	10.97	0	0.2	5.13	0	0	12.86	9.8	97.11	0	9.11	0	2	0	11.76	11.56	48.56	22.26	0	5.75	8.29	2.17	0	0	10	4.12		ZC21A	PONABZinc finger C2HC domain-containing protein 1A OS=Pongo abelii OX=9601 GN=ZC2HC1A PE=2 SV=1
TRINITY_DN3309_c0_g1_i4	8.08	8.86	2.61	19.7	2.93	3.05	20.97	20.57	26.41	20.69	16.39	10.38	22.08	11.53	0	0	7.67	0	6.01	7.16	2.8	18.05	2.7	39.17	2.51	19.74	25.17	15.95	23.32	0	2.78		ZC12B	HUMANProbable ribonuclease ZC3H12B OS=Homo sapiens OX=9606 GN=ZC3H12B PE=2 SV=3
TRINITY_DN3309_c0_g1_i3	41.97	37.14	25.39	39.3	18.07	25.95	81.7	136.43	91.59	84.38	70.62	50.62	104.92	72.66	4	64	21.38	13	45.99	56.62	21.46	72.95	30.3	75.83	81.11	241.09	125.1	150.97	146.86	0	12.22		ZC12A	MOUSEEndoribonuclease ZC3H12A OS=Mus musculus OX=10090 GN=Zc3h12a PE=1 SV=2
TRINITY_DN3309_c0_g1_i2	8.96	0	0	0	0	0	15.34	0	0	11.93	5.99	0	0	6.81	0	0	18.94	0	0	10.21	4.74	0	0	67	27.39	11.17	22.73	9.08	7.82	5	0		ZC12A	MOUSEEndoribonuclease ZC3H12A OS=Mus musculus OX=10090 GN=Zc3h12a PE=1 SV=2
TRINITY_DN110793_c0_g1_i1	0	0	0	0	0	0	0	0	0	0	0	0	0	0	2	0	0	0	0	0	0	0	0	0	0	0	0	0	0	0	0		ZC12A	MOUSEEndoribonuclease ZC3H12A OS=Mus musculus OX=10090 GN=Zc3h12a PE=1 SV=2
TRINITY_DN136259_c0_g1_i1	0	0	0	0	0	0	0	0	0	0	0	0	0	0	50	0	0	0	0	0	0	0	0	0	0	0	0	0	0	0	0		ZC11A	CHICKZinc finger CCCH domain-containing protein 11A OS=Gallus gallus OX=9031 GN=ZC3H11A PE=2 SV=1
TRINITY_DN97140_c0_g1_i1	0	0	0	0	0	0	0	0	0	0	0	0	0	0	2	0	0	0	0	0	0	0	0	0	0	0	0	0	0	0	0		ZBTB3	MOUSEZinc finger and BTB domain-containing protein 3 OS=Mus musculus OX=10090 GN=Zbtb3 PE=2 SV=3
TRINITY_DN71410_c0_g1_i1	0	0	0	0	0	0	0	0	0	0	0	0	0	0	2	0	0	0	0	0	0	0	0	0	0	0	0	0	0	0	0		ZBT8A	RATZinc finger and BTB domain-containing protein 8A OS=Rattus norvegicus OX=10116 GN=Zbtb8a PE=2 SV=1
TRINITY_DN16957_c0_g1_i1	7.22	11	0	3.82	6	5	0	15.29	7.65	0	3.84	0	49	0	0	0	3.81	6	3	60.76	0	43.2	0	24.1	61	64.12	61	36.11	69.99	72	71.76		ZBT8A	BOVINZinc finger and BTB domain-containing protein 8A OS=Bos taurus OX=9913 GN=ZBTB8A PE=2 SV=1
TRINITY_DN12026_c0_g2_i3	0	0	1	0	0	1	0	0	0	0	0	0.07	0	0	0	0	0	0	0	0	2	2	1	0	0	0	0	0.58	0	0	0		ZBT11	MOUSEZinc finger and BTB domain-containing protein 11 OS=Mus musculus OX=10090 GN=Zbtb11 PE=2 SV=1
TRINITY_DN37388_c0_g1_i2	0	0	0	0	0	0	0	0	0	0	0	0	0	0	6.87	0	0	0	0	0	0	0	0	0	0	0	0	0	0	0	0		ZBED4	MOUSEZinc finger BED domain-containing protein 4 OS=Mus musculus OX=10090 GN=Zbed4 PE=2 SV=1
TRINITY_DN63869_c0_g1_i1	0	0	0	0	0	0	0	0	0	0	0	0	0	0	5	0	0	0	0	0	0	0	0	0	0	0	0	0	0	0	0		ZBED4	MOUSEZinc finger BED domain-containing protein 4 OS=Mus musculus OX=10090 GN=Zbed4 PE=2 SV=1
TRINITY_DN80739_c0_g1_i1	0	0	0	0	0	0	0	0	0	0	0	0	0	0	2	0	0	0	0	0	0	0	0	0	0	0	0	0	0	0	0		ZBED4	MOUSEZinc finger BED domain-containing protein 4 OS=Mus musculus OX=10090 GN=Zbed4 PE=2 SV=1
TRINITY_DN67280_c0_g1_i1	0	0	0	0	0	0	0	0	0	0	0	0	0	0	3	0	0	0	0	0	0	0	0	0	0	0	0	0	0	0	0		ZBED4	HUMANZinc finger BED domain-containing protein 4 OS=Homo sapiens OX=9606 GN=ZBED4 PE=1 SV=2
TRINITY_DN37388_c0_g1_i3	0	0	0	0	0	0	0	0	0	0	0	0	0	0	25.31	0	0	0	0	0	0	0	0	0	0	0	0	0	0	0	0		ZBED4	HUMANZinc finger BED domain-containing protein 4 OS=Homo sapiens OX=9606 GN=ZBED4 PE=1 SV=2
TRINITY_DN39641_c0_g1_i1	0	0	0	0	0	0	0	0	0	0	0	0	0	0	1	0	0	0	0	0	0	0	0	0	0	0	0	0	0	0	0		ZBED1	HUMANZinc finger BED domain-containing protein 1 OS=Homo sapiens OX=9606 GN=ZBED1 PE=1 SV=1
TRINITY_DN13210_c0_g1_i19	0	0	0	0	0	0	0	0	0	0	0	0	0	0	4	0	0	0	0	0	0	0	0	0	0	0	0	0	0	0	0		ZBED1	HUMANZinc finger BED domain-containing protein 1 OS=Homo sapiens OX=9606 GN=ZBED1 PE=1 SV=1
TRINITY_DN31170_c0_g5_i1	0	0	0	0	0	0	0	0	0	0	0	0	0	0	17.12	0	0	0	0	0	0	0	0	0	0	0	0	0	0	0	0		ZBED1	HUMANZinc finger BED domain-containing protein 1 OS=Homo sapiens OX=9606 GN=ZBED1 PE=1 SV=1
TRINITY_DN112387_c0_g1_i1	0	0	0	0	0	0	0	0	0	0	0	0	0	0	5	0	0	0	0	0	0	0	0	0	0	0	0	0	0	0	0		ZBED1	HUMANZinc finger BED domain-containing protein 1 OS=Homo sapiens OX=9606 GN=ZBED1 PE=1 SV=1
TRINITY_DN101646_c0_g1_i1	0	0	0	0	0	0	0	0	0	0	0	0	0	0	5	0	0	0	0	0	0	0	0	0	0	0	0	0	0	0	0		ZBED1	HUMANZinc finger BED domain-containing protein 1 OS=Homo sapiens OX=9606 GN=ZBED1 PE=1 SV=1
TRINITY_DN31170_c0_g5_i2	0	0	0	0	0	0	0	0	0	0	0	0	0	0	2.6	0	0	0	0	0	0	0	0	0	0	0	0	0	0	0	0		ZBED1	HUMANZinc finger BED domain-containing protein 1 OS=Homo sapiens OX=9606 GN=ZBED1 PE=1 SV=1
TRINITY_DN116055_c0_g1_i1	0	0	0	0	0	0	0	0	0	0	0	0	0	0	2	0	0	0	0	0	0	0	0	0	0	0	0	0	0	0	0		ZBED1	HUMANZinc finger BED domain-containing protein 1 OS=Homo sapiens OX=9606 GN=ZBED1 PE=1 SV=1
TRINITY_DN37388_c0_g1_i5	0	0	0	0	0	0	0	0	0	0	0	0	0	0	12.21	0	0	0	0	0	0	0	0	0	0	0	0	0	0	0	0		ZBED1	HUMANZinc finger BED domain-containing protein 1 OS=Homo sapiens OX=9606 GN=ZBED1 PE=1 SV=1
TRINITY_DN60793_c0_g1_i1	0	0	0	0	0	0	0	0	0	0	0	0	0	0	22	0	0	0	0	0	0	0	0	0	0	0	0	0	0	0	0		ZBED1	HUMANZinc finger BED domain-containing protein 1 OS=Homo sapiens OX=9606 GN=ZBED1 PE=1 SV=1
TRINITY_DN37388_c0_g1_i4	0	0	0	0	0	0	0	0	0	0	0	0	0	0	21.22	0	0	0	0	0	0	0	0	0	0	0	0	0	0	0	0		ZBED1	HUMANZinc finger BED domain-containing protein 1 OS=Homo sapiens OX=9606 GN=ZBED1 PE=1 SV=1
TRINITY_DN69330_c0_g1_i1	0	0	0	0	0	0	0	0	0	0	0	0	0	0	2	0	0	0	0	0	0	0	0	0	0	0	0	0	0	0	0		ZBED1	HUMANZinc finger BED domain-containing protein 1 OS=Homo sapiens OX=9606 GN=ZBED1 PE=1 SV=1
TRINITY_DN114982_c0_g1_i1	0	0	0	0	0	0	0	0	0	0	0	0	0	0	4	0	0	0	0	0	0	0	0	0	0	0	0	0	0	0	0		ZBED1	HUMANZinc finger BED domain-containing protein 1 OS=Homo sapiens OX=9606 GN=ZBED1 PE=1 SV=1
TRINITY_DN31170_c0_g5_i3	0	0	0	0	0	0	0	0	0	0	0	0	0	0	13.29	0	0	0	0	0	0	0	0	0	0	0	0	0	0	0	0		ZBED1	HUMANZinc finger BED domain-containing protein 1 OS=Homo sapiens OX=9606 GN=ZBED1 PE=1 SV=1
TRINITY_DN100752_c0_g1_i1	0	0	0	0	0	0	0	0	0	0	0	0	0	0	7	0	0	0	0	0	0	0	0	0	0	0	0	0	0	0	0		ZBED1	HUMANZinc finger BED domain-containing protein 1 OS=Homo sapiens OX=9606 GN=ZBED1 PE=1 SV=1
TRINITY_DN97545_c0_g1_i1	0	0	0	0	0	0	0	0	0	0	0	0	0	0	5	0	0	0	0	0	0	0	0	0	0	0	0	0	0	0	0		ZBED1	HUMANZinc finger BED domain-containing protein 1 OS=Homo sapiens OX=9606 GN=ZBED1 PE=1 SV=1
TRINITY_DN45343_c0_g2_i1	0	0	0	0	0	0	0	0	0	0	0	0	0	0	8	0	0	0	0	0	0	0	0	0	0	0	0	0	0	0	0		ZBBX	HUMANZinc finger B-box domain-containing protein 1 OS=Homo sapiens OX=9606 GN=ZBBX PE=2 SV=3
TRINITY_DN1110_c0_g1_i11	0	6.41	0	0	0	0	0	5.61	0	11.08	0	0	14.77	2.49	0	0	22.35	7	35.89	0	0	29.72	0	50.2	0	31.92	15.53	0	33.05	0	0		ZAR1L	BOVINZAR1-like protein OS=Bos taurus OX=9913 GN=ZAR1L PE=2 SV=3
TRINITY_DN1110_c0_g1_i16	0	0	0	0	0	17.27	0	0	0	0	0	1.96	9.27	5.08	0	0	0	0	0	0	0	11.52	0	9.5	0	8.82	9.06	0	0.22	0	1		ZAR1L	BOVINZAR1-like protein OS=Bos taurus OX=9913 GN=ZAR1L PE=2 SV=3
TRINITY_DN1110_c0_g1_i7	3	0	4.87	2.06	0	0	3.06	0.97	0	8.51	0	1.16	3.63	4.19	0	6.42	0	1	0	0	0	1.04	3.84	0	4.02	10.18	3.63	15.51	0	0	0		ZAR1L	BOVINZAR1-like protein OS=Bos taurus OX=9913 GN=ZAR1L PE=2 SV=3
TRINITY_DN1110_c0_g1_i21	0	0	0	0	0	0	0	0	16.12	0	0	4.6	5.06	0	0	141.03	10.47	0	0	28.24	16.83	0	25.8	0	29.55	0	17.01	20.32	18.62	0	0		ZAR1L	BOVINZAR1-like protein OS=Bos taurus OX=9913 GN=ZAR1L PE=2 SV=3
TRINITY_DN1110_c0_g1_i12	0	1.59	13	12.06	11	0	4.94	0.04	0	0	5	3.26	0.44	3.08	7	53.06	5.25	0	1.18	18.69	16.9	0	0	0	7.72	29.63	0	24.39	0.66	0	0		ZAR1L	BOVINZAR1-like protein OS=Bos taurus OX=9913 GN=ZAR1L PE=2 SV=3
TRINITY_DN1110_c0_g1_i8	0	0	0	3.77	0	3.49	0	2.38	0	3.42	0	0	0	0	0	0	7.6	0	33.23	0	0	3.71	3.35	5.31	0	6.95	2.9	0	7.42	0	0		ZAR1L	BOVINZAR1-like protein OS=Bos taurus OX=9913 GN=ZAR1L PE=2 SV=3
TRINITY_DN1110_c0_g1_i3	4	0	2.88	1.12	0	1.1	0	0	0.09	0	0	4.03	1.83	0	0	0	2.33	0	3.7	0	0	0	0	0	0	0	3.7	0	0	0	0		ZAR1	XENLAZygote arrest protein 1 OS=Xenopus laevis OX=8355 GN=zar1 PE=2 SV=1
TRINITY_DN138282_c0_g1_i1	0	0	0	0	0	0	0	0	0	2	0	0	0	0	0	0	0	0	0	0	0	0	0	0	0	0	0	0	0	0	0		ZAPA	PROMISerralysin OS=Proteus mirabilis OX=584 GN=zapA PE=3 SV=1
TRINITY_DN142068_c0_g1_i1	0	0	0	0	0	1	0	0	0	0	0	0	0	1	0	0	0	0	0	0	0	0	1	0	0	0	0	0	0	0	0		ZAPA	PECASCell division protein ZapA OS=Pectobacterium atrosepticum (strain SCRI 1043 / ATCC BAA-672) OX=218491 GN=zapA PE=3 SV=1
TRINITY_DN7850_c0_g1_i11	6	0	1	0	0.99	0	3	0	0	1	0	0	0	0	0	0	0	0	1	4	0	2	1	0	1	1	0	0.95	3	0	0.98		ZAP70	MOUSETyrosine-protein kinase ZAP-70 OS=Mus musculus OX=10090 GN=Zap70 PE=1 SV=3
TRINITY_DN114334_c0_g1_i1	0	0	0	0	0	0	0	0	0	0	0	0	0	0	0	2	0	0	0	0	1	0	0	0	0	0	0	0	0	0	0		ZAM	SYNY3Acetazolamide conferring resistance protein zam OS=Synechocystis sp. (strain PCC 6803 / Kazusa) OX=1111708 GN=zam PE=3 SV=1
TRINITY_DN119055_c0_g1_i1	0	0	0	0	0	0	0	0	0	0	0	0	0	0	2	0	0	0	1	0	0	0	0	0	0	0	0	0	0	0	0		ZAM	SYNY3Acetazolamide conferring resistance protein zam OS=Synechocystis sp. (strain PCC 6803 / Kazusa) OX=1111708 GN=zam PE=3 SV=1
TRINITY_DN13325_c0_g1_i1	0	1	1	2	0	2	2	0	0	1	0	0	0	0	0	0	0	0	1.32	1	0	1	0	0	0	0	1	1	2	0	0		ZAK1	DICDIDual specificity protein kinase zakA OS=Dictyostelium discoideum OX=44689 GN=zakA PE=1 SV=1
TRINITY_DN390_c1_g1_i8	10.71	9.08	10.8	13.07	16.37	19.43	17.82	15.03	20.76	18.65	7.26	6.29	16.12	10.67	1	23.22	14.97	1.24	25.6	19.69	6.89	38.42	18.98	39.99	22.69	27.2	26.26	26.12	14.98	0	1		ZAK1	DICDIDual specificity protein kinase zakA OS=Dictyostelium discoideum OX=44689 GN=zakA PE=1 SV=1
TRINITY_DN16700_c0_g1_i1	0	0	0	0	0	1	0	0	0	0	0	0	0	0	0	1	0	0	0	1	0	0	1	0	0	1	0	0	0	0	0		ZAK1	DICDIDual specificity protein kinase zakA OS=Dictyostelium discoideum OX=44689 GN=zakA PE=1 SV=1
TRINITY_DN390_c1_g1_i16	1.24	0	0	0.98	0	0	1.44	1.38	0	0	0	0.89	2.76	9.18	0	2.01	0	0	4.16	0	0	0	2.29	3.93	1.47	0	8.89	1.1	0	0	0		ZAK1	DICDIDual specificity protein kinase zakA OS=Dictyostelium discoideum OX=44689 GN=zakA PE=1 SV=1
TRINITY_DN10537_c0_g2_i2	0.1	0	2.45	0	0	0	1	0	0	0	0	0	2	1	0	0	2	0	1	1	1	0	0	0	0	0	0.13	0	0	0.2	1		ZAK1	DICDIDual specificity protein kinase zakA OS=Dictyostelium discoideum OX=44689 GN=zakA PE=1 SV=1
TRINITY_DN97091_c0_g1_i1	0	0	0	0	2	0	1	0	0	0	0	0	0	0	0	0	0	0	0	0	0	0	0	0	0	0	0	0	0	0	0		Z804A	MOUSEZinc finger protein 804A OS=Mus musculus OX=10090 GN=Znf804a PE=2 SV=1
TRINITY_DN118152_c0_g1_i1	0	0	0	0	0	0	0	0	0	0	0	0	0	0	11	0	0	0	0	0	0	0	0	0	0	0	0	0	0	0	0		Z512B	HUMANZinc finger protein 512B OS=Homo sapiens OX=9606 GN=ZNF512B PE=1 SV=1
TRINITY_DN32616_c1_g1_i1	0	0	0	0	0	0	0	0	0	0	1	0	0	1	0	0	0	0	0	0	0	0	0	0	0	0	1	0	0	0	0		Z3H7B	HUMANZinc finger CCCH domain-containing protein 7B OS=Homo sapiens OX=9606 GN=ZC3H7B PE=1 SV=2
TRINITY_DN32616_c0_g1_i7	0	0	0	0	0	0	0	0	0	0	2	0	0	0	0	0	0	0	0	1	0	0	0	0	0	0	0	0	0	0	0		Z3H7A	HUMANZinc finger CCCH domain-containing protein 7A OS=Homo sapiens OX=9606 GN=ZC3H7A PE=1 SV=1
TRINITY_DN32616_c0_g1_i1	0	0	0	0	0	0	0	0	0	0	0	0	0	3	0	0	0	0	2	1	0	0	0	0	0	0	0	0	0	0	0		Z3H7A	HUMANZinc finger CCCH domain-containing protein 7A OS=Homo sapiens OX=9606 GN=ZC3H7A PE=1 SV=1
TRINITY_DN58403_c0_g1_i1	0	0	0	0	0	0	0	1	0	0	0	0	0	0	1	2	0	0	0	0	0	0	1	0	0	0	0	0	0	0	0		YZ37	SYNY3Uncharacterized sugar kinase slr0537 OS=Synechocystis sp. (strain PCC 6803 / Kazusa) OX=1111708 GN=slr0537 PE=3 SV=1
TRINITY_DN130649_c0_g1_i1	0	0	0	0	0	0	0	0	0	0	0	0	0	0	2	0	0	0	0	0	0	0	0	0	0	0	0	0	0	0	0		YZ2R	AGRVIUncharacterized 52.8 kDa protein in TAR-I ttuC' 3'region OS=Agrobacterium vitis OX=373 PE=4 SV=2
TRINITY_DN80237_c0_g1_i1	2	0	0	0	0	0	0	0	0	0	0	0	0	0	0	0	0	0	0	0	0	0	0	0	0	0	0	0	0	0	0		YZ2R	AGRVIUncharacterized 52.8 kDa protein in TAR-I ttuC' 3'region OS=Agrobacterium vitis OX=373 PE=4 SV=2
TRINITY_DN109877_c0_g1_i1	1	0	0	1	1	0	0	0	0	0	0	0	0	0	0	0	0	0	0	0	0	0	0	0	0	0	0	0	0	0	0		YZ2R	AGRVIUncharacterized 52.8 kDa protein in TAR-I ttuC' 3'region OS=Agrobacterium vitis OX=373 PE=4 SV=2
TRINITY_DN89824_c0_g1_i1	0	0	0	0	0	0	0	0	0	0	0	0	0	0	3	0	0	0	0	0	0	0	0	0	0	0	0	0	0	0	0		YYDG	BACSUPutative peptide biosynthesis protein YydG OS=Bacillus subtilis (strain 168) OX=224308 GN=yydG PE=4 SV=1
TRINITY_DN71065_c0_g1_i1	0	0	0	0	0	0	0	0	0	0	0	0	0	0	2	0	0	0	0	0	0	0	0	0	0	0	0	0	0	0	0		YYCJ	BACSUPutative metallo-hydrolase YycJ OS=Bacillus subtilis (strain 168) OX=224308 GN=yycJ PE=2 SV=1
TRINITY_DN101376_c0_g1_i1	0	0	0	0	0	0	0	0	0	0	0	0	0	0	1	0	0	0	0	0	0	0	0	0	0	0	0	0	0	0	0		YYBB	BACSUProbable metallo-hydrolase YybB OS=Bacillus subtilis (strain 168) OX=224308 GN=yybB PE=3 SV=1
TRINITY_DN123474_c0_g1_i1	0	0	0	0	1	1	0	0	0	0	0	0	0	0	0	1	0	0	0	0	0	0	0	0	1	0	0	0	0	0	0		YYAL	BACSUUncharacterized protein YyaL OS=Bacillus subtilis (strain 168) OX=224308 GN=yyaL PE=4 SV=1
TRINITY_DN31671_c0_g1_i1	0	0	0	0	2	1	0	0	0	0	0	0	0	0	0	0	0	0	0	0	0	0	0	0	0	0	0	0	0	0	0		YYAE	BACSUProbable oxidoreductase YyaE OS=Bacillus subtilis (strain 168) OX=224308 GN=yyaE PE=3 SV=1
TRINITY_DN7473_c0_g1_i12	0	0	0	0	0	0	0	0	0	0	0	0	0	0	0	0	0	0	0	0	0	0	0	0	0	0	0	0	0	0	4.64		YY42	CAEELGlycosyltransferase family 92 protein C33H5.2 OS=Caenorhabditis elegans OX=6239 GN=C33H5.2 PE=3 SV=1
TRINITY_DN7473_c0_g1_i7	0	0	0	0	5.15	0	0	0	0	0	0	0	6.41	5.9	0	0	0	0	8	0	0	0	5	9.65	0	0	0	0	0	0	0		YY42	CAEELGlycosyltransferase family 92 protein C33H5.2 OS=Caenorhabditis elegans OX=6239 GN=C33H5.2 PE=3 SV=1
TRINITY_DN7473_c0_g1_i6	0	0	3.66	0	7.85	0	10	0	0	0	0	4	0	0	0	0	0	2	0	0	5.29	8	0	0	0	0	0	0	0	9	1.87		YY42	CAEELGlycosyltransferase family 92 protein C33H5.2 OS=Caenorhabditis elegans OX=6239 GN=C33H5.2 PE=3 SV=1
TRINITY_DN7473_c0_g1_i4	0	0	0	0	0	0	0	8	0	0	8	0	0	0	0	0	0	0	0	0	16.71	0	0	0	0	7.81	0	0	0	0	0		YY42	CAEELGlycosyltransferase family 92 protein C33H5.2 OS=Caenorhabditis elegans OX=6239 GN=C33H5.2 PE=3 SV=1
TRINITY_DN7473_c0_g1_i15	0	0	0	0	0	0	0	0	0	9	0	0	0	0	1	0	0	0	0	0	0	0	0	0	0	0	12	11.68	0	0	2.5		YY42	CAEELGlycosyltransferase family 92 protein C33H5.2 OS=Caenorhabditis elegans OX=6239 GN=C33H5.2 PE=3 SV=1
TRINITY_DN7473_c0_g1_i3	6.5	0	0	0	0	0	0	0	0	0	0	0	0	17.1	1	11	0	0	0	12	0	0	0	0	0	11.19	0	0	0	0	0		YY42	CAEELGlycosyltransferase family 92 protein C33H5.2 OS=Caenorhabditis elegans OX=6239 GN=C33H5.2 PE=3 SV=1
TRINITY_DN7473_c0_g1_i2	3.01	16	6.34	1.86	0	11	0	0	9	0	0	0	23.59	0	0	0	8	0	0	0	0	0	0	6.35	0	0	0	8.32	11	0	0		YY42	CAEELGlycosyltransferase family 92 protein C33H5.2 OS=Caenorhabditis elegans OX=6239 GN=C33H5.2 PE=3 SV=1
TRINITY_DN7473_c0_g1_i14	0	0	0	8.3	0	0	0	0	0	0	0	0	0	0	0	0	0	0	0	0	0	0	0	0	11	0	0	0	0	0	0		YY42	CAEELGlycosyltransferase family 92 protein C33H5.2 OS=Caenorhabditis elegans OX=6239 GN=C33H5.2 PE=3 SV=1
TRINITY_DN7473_c0_g1_i5	2.49	0	0	3.84	0	0	0	0	0	0	0	0	0	0	0	0	0	0	0	0	0	0	0	0	0	0	0	0	0	0	0		YY42	CAEELGlycosyltransferase family 92 protein C33H5.2 OS=Caenorhabditis elegans OX=6239 GN=C33H5.2 PE=3 SV=1
TRINITY_DN66915_c0_g1_i1	0	0	0	1	0	1	0	0	0	0	0	0	0	7	0	0	0	0	0	0	0	1	0	0	0	0	0	0	0	0	0		YXIE	BACSUUniversal stress protein YxiE OS=Bacillus subtilis (strain 168) OX=224308 GN=yxiE PE=3 SV=1
TRINITY_DN92728_c0_g1_i1	0	0	0	0	0	0	0	0	0	0	0	0	0	0	2	0	0	0	0	0	0	0	0	0	0	0	0	0	0	0	0		YXEK	CAEELUncharacterized oxidoreductase F53C11.3 OS=Caenorhabditis elegans OX=6239 GN=F53C11.3 PE=3 SV=1
TRINITY_DN20915_c0_g1_i6	0	1.71	0	0	0	0	0	0	0	0	1.84	0	0	0	0	0	0	0	0	0	0	0	0	0	0	0	0	0	0	0	0		YWTG	BACSUPutative metabolite transport protein YwtG OS=Bacillus subtilis (strain 168) OX=224308 GN=ywtG PE=3 SV=1
TRINITY_DN20915_c0_g1_i1	3	0.83	1	7	0	2	2	3	1	3	0.71	3	1	2	0	1	1	0	2	3	1	4	1	3	2	0	7	4	2	1	2		YWTG	BACSUPutative metabolite transport protein YwtG OS=Bacillus subtilis (strain 168) OX=224308 GN=ywtG PE=3 SV=1
TRINITY_DN3765_c0_g1_i3	4	1	3.82	1	1	1.62	0	1	2	1	0	5	1.65	0	0	0	7	0	5	1	3	0	6.42	9	1	0	8.66	1.66	6.46	0	0		YWTG	BACSUPutative metabolite transport protein YwtG OS=Bacillus subtilis (strain 168) OX=224308 GN=ywtG PE=3 SV=1
TRINITY_DN916_c0_g1_i4	2.39	6.32	5.35	0	0	3.84	5.99	4.43	0	0	2.01	0	0	14.14	0	0	0	0	1.58	1.82	2.92	0	9.2	6.15	0	0	0	3.16	1	0	0		YWTG	BACSUPutative metabolite transport protein YwtG OS=Bacillus subtilis (strain 168) OX=224308 GN=ywtG PE=3 SV=1
TRINITY_DN204_c0_g1_i18	0	12.75	37.66	0	7.57	38.27	0.94	11.44	39.28	0	23.65	9.91	26.94	19.5	1.53	15.76	0	0	9.69	17.93	17.63	25.32	3.36	18.54	0	28.61	15	30.22	8.83	21.99	12.75		YWTG	BACSUPutative metabolite transport protein YwtG OS=Bacillus subtilis (strain 168) OX=224308 GN=ywtG PE=3 SV=1
TRINITY_DN20915_c0_g1_i2	1	1.46	2	0	0	0	0	0	0	0	1.44	0	0	0	0	0	0	0	0	0	0	0	0	0	0	0	0	0	0	0	0		YWTG	BACSUPutative metabolite transport protein YwtG OS=Bacillus subtilis (strain 168) OX=224308 GN=ywtG PE=3 SV=1
TRINITY_DN204_c0_g1_i15	6.26	10.82	3.27	22.02	2.27	7.09	6.84	5.77	0	2.84	4.01	11.82	10.99	9.26	0.47	12.75	4.16	2.57	15.56	9.18	3.96	5.72	0	2.98	4.1	8.75	10.85	3.85	12.89	5.3	1.91		YWTG	BACSUPutative metabolite transport protein YwtG OS=Bacillus subtilis (strain 168) OX=224308 GN=ywtG PE=3 SV=1
TRINITY_DN3765_c0_g1_i1	0	1	1.18	0	0	1.38	0	0	0	1	0	0	6.35	0	0	0	0	0	0	0	0	1	1.58	0	0	0	4.34	1.34	1.54	0	0		YWTG	BACSUPutative metabolite transport protein YwtG OS=Bacillus subtilis (strain 168) OX=224308 GN=ywtG PE=3 SV=1
TRINITY_DN204_c0_g1_i16	2.48	4.22	0	0	0	0	11.56	0	9.06	0	0	0	3.35	0	0	0	0	0	6.19	0	0.63	6.7	5.64	0	0	0.61	5.46	5.52	2.59	0	3.27		YWTG	BACSUPutative metabolite transport protein YwtG OS=Bacillus subtilis (strain 168) OX=224308 GN=ywtG PE=3 SV=1
TRINITY_DN916_c0_g1_i19	0	6.14	0	0	4.75	10.34	0	3.93	0	5.72	11.56	0	1.64	4.82	0	14.92	3.01	0	14.47	11.81	3.12	0	8.83	10.34	7.05	0.88	0	1.45	7.21	0	3.42		YWTG	BACSUPutative metabolite transport protein YwtG OS=Bacillus subtilis (strain 168) OX=224308 GN=ywtG PE=3 SV=1
TRINITY_DN916_c0_g1_i20	3.62	3.14	5.74	0	0	0	7.07	0	5.1	0	0	0	14.88	5.72	0	0	0	0	18.4	0	0	0	10.43	9.66	0	0	10.25	0	6.87	0	0		YWTG	BACSUPutative metabolite transport protein YwtG OS=Bacillus subtilis (strain 168) OX=224308 GN=ywtG PE=3 SV=1
TRINITY_DN46728_c0_g1_i1	0	0	0	0	0	0	0	0	0	0	0	0	0	0	0	0	0	0	0	0	0	0	0	0	0	0	0	0	0	0	0		YWTG	BACSUPutative metabolite transport protein YwtG OS=Bacillus subtilis (strain 168) OX=224308 GN=ywtG PE=3 SV=1
TRINITY_DN123587_c0_g1_i1	3	3	5	2	1	3	1.05	2	1.19	0	1	0	7	4.37	0	2.02	0	0	5	2	1.03	2.03	7	3	0	1.03	4	1	5	0	0		YWTG	BACSUPutative metabolite transport protein YwtG OS=Bacillus subtilis (strain 168) OX=224308 GN=ywtG PE=3 SV=1
TRINITY_DN916_c0_g1_i1	7.94	3.89	2.76	7.27	4.32	5.27	0	0.59	4.04	5.08	3.27	4.12	13.78	34.47	0	6.31	0	1.11	8	2.26	10.24	8.95	5	6.02	3.15	6.2	0	3.99	4.38	0.95	7.31		YWTG	BACSUPutative metabolite transport protein YwtG OS=Bacillus subtilis (strain 168) OX=224308 GN=ywtG PE=3 SV=1
TRINITY_DN83149_c0_g1_i1	0	2	0	0	0	0	0	0	0	0	0	0	0	0	0	0	0	0	0	0	0	0	0	0	0	0	0	0	0	0	0		YWRD	BACSUGlutathione hydrolase-like YwrD proenzyme OS=Bacillus subtilis (strain 168) OX=224308 GN=ywrD PE=1 SV=1
TRINITY_DN115220_c0_g1_i1	0	0	0	0	0	0	0	0	0	0	0	0	0	0	0	3	0	0	1	0	0	0	0	0	0	0	0	0	0	0	0		YWQD	BACSUTyrosine-protein kinase YwqD OS=Bacillus subtilis (strain 168) OX=224308 GN=ywqD PE=1 SV=1
TRINITY_DN64567_c0_g1_i1	0	0	0	0	0	0	1	0	2	0	0	0	1	0	0	1	0	0	0	0	0	2	3	0	0	0	0	0	0	0	0		YWPD	BACSUPutative uncharacterized protein YwpD OS=Bacillus subtilis (strain 168) OX=224308 GN=ywpD PE=5 SV=1
TRINITY_DN11362_c0_g1_i1	0	0	0	0	0	0	0	0	0	0	0	0	0	0	154	0	0	0	0	0	0	0	0	0	0	0	0	0	0	0	0		YWOF	BACSUUncharacterized protein YwoF OS=Bacillus subtilis (strain 168) OX=224308 GN=ywoF PE=3 SV=1
TRINITY_DN3301_c0_g1_i1	2.43	0	1.47	0	0	0	3.35	0	7.01	3.16	0	3.98	5.24	3.45	0	0	0	0	1.62	0	1.83	0	0	1.83	2.85	0	0	4.97	0	0	0		YWBO	BACSUUncharacterized protein YwbO OS=Bacillus subtilis (strain 168) OX=224308 GN=ywbO PE=4 SV=1
TRINITY_DN3301_c0_g1_i5	14.57	15	15.53	24.39	15	22	23.65	11.91	14.99	11.84	28.32	6.02	28.76	7.55	1	32	7	2	23.19	27	10.17	17.77	15	10.17	18.15	15	17	9.03	13	4	9		YWBO	BACSUUncharacterized protein YwbO OS=Bacillus subtilis (strain 168) OX=224308 GN=ywbO PE=4 SV=1
TRINITY_DN65900_c0_g1_i1	0	0	0	0	0	0	0	0	0	0	0	0	0	0	10	0	0	0	0	0	0	0	0	0	0	0	0	0	0	0	0		YWBO	BACSUUncharacterized protein YwbO OS=Bacillus subtilis (strain 168) OX=224308 GN=ywbO PE=4 SV=1
TRINITY_DN55022_c0_g3_i1	0	0	0	0	0	0	0	0	0	0	0	0	0	0	7	0	0	0	0	0	0	0	0	0	0	0	0	0	0	0	0		YVRE	BACSUPutative sugar lactone lactonase YvrE OS=Bacillus subtilis (strain 168) OX=224308 GN=yvrE PE=3 SV=1
TRINITY_DN100290_c0_g1_i1	0	0	0	0	0	0	0	0	0	0	0	0	0	1	0	0	0	0	0	1	0	0	0	0	0	0	0	0	0	0	0		YVN1	AZOVIRutC family protein in vnfA 5'region OS=Azotobacter vinelandii OX=354 PE=3 SV=2
TRINITY_DN5591_c0_g1_i9	3.81	5.66	6.31	10.69	4.89	7.03	4.56	2.83	0	6.54	9.83	6.87	11.34	16	0	19	5	5.71	14.85	12.62	1.3	3.45	19.03	26	13.28	5.04	9.63	0	2.11	0	1		YVDP	BACSUUncharacterized FAD-linked oxidoreductase YvdP OS=Bacillus subtilis (strain 168) OX=224308 GN=yvdP PE=1 SV=1
TRINITY_DN5591_c0_g1_i15	3.19	0	4.69	9.31	3.11	1.97	6.44	9.07	0	6.46	3.17	3.13	0	0	0	0	0	2.29	3.15	2.38	2.7	20.55	4.97	0	2.72	8	4.37	18	5.97	0	0		YVDP	BACSUUncharacterized FAD-linked oxidoreductase YvdP OS=Bacillus subtilis (strain 168) OX=224308 GN=yvdP PE=1 SV=1
TRINITY_DN5591_c0_g1_i5	0	6.34	0	0	0	0	0	0	12	0	0	0	3.9	0	0	2	0	0	0	0	0	0	0	0	0	7.96	0	0	5.92	0	0		YVDP	BACSUUncharacterized FAD-linked oxidoreductase YvdP OS=Bacillus subtilis (strain 168) OX=224308 GN=yvdP PE=1 SV=1
TRINITY_DN89025_c0_g1_i1	0	0	0	0	0	0	0	0	0	0	0	0	0	0	0	0	0	0	0	0	0	0	0	0	0	0	0	0	0	0	0		YVAG	BACSUUncharacterized oxidoreductase YvaG OS=Bacillus subtilis (strain 168) OX=224308 GN=yvaG PE=3 SV=1
TRINITY_DN130385_c0_g1_i1	0	0	0	0	0	0	0	0	0	0	0	0	0	0	4	0	0	0	0	0	0	0	0	0	0	0	0	0	0	0	0		YVAG	BACSUUncharacterized oxidoreductase YvaG OS=Bacillus subtilis (strain 168) OX=224308 GN=yvaG PE=3 SV=1
TRINITY_DN136217_c0_g1_i1	0	1	0	1	0	0	0	0	0	0	0	0	0	0	2	2	2	0	0	1	0	0	0	0	0	0	0	0	0	0	0		YUZA	BACSUUncharacterized membrane protein YuzA OS=Bacillus subtilis (strain 168) OX=224308 GN=yuzA PE=4 SV=1
TRINITY_DN131761_c0_g1_i1	0	0	0	0	0	0	0	0	0	5	0	0	0	0	0	0	0	0	0	0	0	0	0	0	0	0	0	0	0	0	0		YUXL	BACSUUncharacterized peptidase YuxL OS=Bacillus subtilis (strain 168) OX=224308 GN=yuxL PE=3 SV=3
TRINITY_DN78248_c0_g1_i1	0	0	1	0	0	0	0	0	0	0	0	0	0	0	0	0	0	0	0	0	0	0	0	0	0	0	0	0	0	0	0		YUTI	BACSUPutative nitrogen fixation protein YutI OS=Bacillus subtilis (strain 168) OX=224308 GN=yutI PE=3 SV=1
TRINITY_DN146218_c0_g1_i1	0	0	0	0	0	0	0	0	0	0	0	0	0	0	2	0	0	0	0	0	0	0	0	0	0	0	0	0	0	0	0		YURJ	BACSUUncharacterized ABC transporter ATP-binding protein YurJ OS=Bacillus subtilis (strain 168) OX=224308 GN=yurJ PE=3 SV=1
TRINITY_DN49377_c0_g2_i1	0	4	0	2	2	2	6	0	0	1	1	3	0	0	0	4	1	0	4	2	1	4	9	0	0	0	0	2	1	0	0		YUGP	BACSUPutative membrane protease YugP OS=Bacillus subtilis (strain 168) OX=224308 GN=yugP PE=4 SV=1
TRINITY_DN122211_c0_g1_i1	0	0	0	0	0	0	0	0	1	0	0	0	0	0	0	0	0	0	0	0	0	0	1	0	0	0	0	0	0	0	0		YUFQ	BACSUUncharacterized ABC transporter permease protein YufQ OS=Bacillus subtilis (strain 168) OX=224308 GN=yufQ PE=3 SV=1
TRINITY_DN69732_c0_g1_i1	0	0	0	0	0	1	0	0	0	0	0	0	0	0	0	1	0	0	0	0	0	0	0	0	0	0	0	0	0	0	0		YUFP	BACSUUncharacterized ABC transporter permease protein YufP OS=Bacillus subtilis (strain 168) OX=224308 GN=yufP PE=3 SV=1
TRINITY_DN100940_c0_g1_i1	0	0	0	0	0	0	0	0	0	1	0	0	0	0	0	0	0	0	0	0	0	1	0	0	0	0	0	0	0	0	0		YUFP	BACSUUncharacterized ABC transporter permease protein YufP OS=Bacillus subtilis (strain 168) OX=224308 GN=yufP PE=3 SV=1
TRINITY_DN73945_c0_g1_i1	0	0	0	0	0	1	1	0	0	0	0	0	0	0	0	0	0	0	0	0	0	0	0	0	0	0	0	0	0	0	0		YUFO	BACSUUncharacterized ABC transporter ATP-binding protein YufO OS=Bacillus subtilis (strain 168) OX=224308 GN=yufO PE=3 SV=1
TRINITY_DN97785_c0_g1_i1	0	0	0	0	0	0	1	1	0	0	0	0	0	0	0	0	0	0	0	0	0	0	0	0	0	0	0	0	0	0	0		YUFO	BACSUUncharacterized ABC transporter ATP-binding protein YufO OS=Bacillus subtilis (strain 168) OX=224308 GN=yufO PE=3 SV=1
TRINITY_DN17219_c0_g1_i3	1	0.33	2.64	0	1.5	0	0	2.33	0	2.87	6.56	0	1.33	0	0	0	0	1	3	2	1	0	6.88	10.22	2.71	0	8.59	7	4.15	0	0		YUFN	BACSUUncharacterized lipoprotein YufN OS=Bacillus subtilis (strain 168) OX=224308 GN=yufN PE=3 SV=2
TRINITY_DN17219_c0_g1_i4	1	0.33	5.36	12	1.5	3	0	2.33	5.15	0.44	0	16	1.33	0	0	3.6	0	1	6	0	1	1.69	0	9.17	0.77	0	0	0	2.07	0	0		YUFN	BACSUUncharacterized lipoprotein YufN OS=Bacillus subtilis (strain 168) OX=224308 GN=yufN PE=3 SV=2
TRINITY_DN120012_c0_g1_i1	1	2	5	1	2	0	3	2	3	3	4	1	2	5	0	0	1	0	1	0	1	0	0	2	1	0	0	0	1	0	0		YUFN	BACSUUncharacterized lipoprotein YufN OS=Bacillus subtilis (strain 168) OX=224308 GN=yufN PE=3 SV=2
TRINITY_DN17219_c0_g1_i6	0	0	0	0	0	0	0	0	0	0.69	0	0	0	0	0	2.4	1	0	0	0	0	2.31	0	5.61	3.53	1	0	0	0	0	0		YUFN	BACSUUncharacterized lipoprotein YufN OS=Bacillus subtilis (strain 168) OX=224308 GN=yufN PE=3 SV=2
TRINITY_DN91176_c0_g1_i1	0	2	0	0	1	0	3	6	8	0	1	0	2	4	0	4	4	1	6	6	5	7	30	0	0	0	0	0	0	0	0		YUFN	BACSUUncharacterized lipoprotein YufN OS=Bacillus subtilis (strain 168) OX=224308 GN=yufN PE=3 SV=2
TRINITY_DN114716_c0_g1_i1	0	2	0	2	0	0	0	1	0	0	0	0	1	0	0	0	0	0	1	0	0	0	0	0	0	0	0	0	0	0	0		YUFN	BACSUUncharacterized lipoprotein YufN OS=Bacillus subtilis (strain 168) OX=224308 GN=yufN PE=3 SV=2
TRINITY_DN17219_c0_g1_i2	1	0.33	0	0	0	0	4	2.33	3.85	0	4.44	0	1.33	7	0	0	0	0	0	0	2	0	3.12	0	0	0	6.41	0	1.78	0	0		YUFN	BACSUUncharacterized lipoprotein YufN OS=Bacillus subtilis (strain 168) OX=224308 GN=yufN PE=3 SV=2
TRINITY_DN72810_c0_g1_i1	0	0	0	0	0	0	0	0	0	0	0	0	0	0	2	0	0	0	0	0	0	0	0	0	0	0	0	0	0	0	0		YUAD	ECOLIUncharacterized membrane protein YuaD OS=Escherichia coli (strain K12) OX=83333 GN=yuaD PE=4 SV=1
TRINITY_DN124022_c0_g1_i1	0	0	1	2	2	0	0	0	0	0	4	0	0	2	0	0	2	1	0	0	0	0	0	0	0	0	0	0	0	0	0		YU88	ARATHUPF0187 protein At3g61320, chloroplastic OS=Arabidopsis thaliana OX=3702 GN=At3g61320 PE=2 SV=2
TRINITY_DN102573_c0_g1_i1	0	0	0	0	1	0	0	0	0	0	3	0	0	0	0	0	0	0	0	1	0	0	0	1	0	0	0	1	0	0	0		YU87	ARATHUPF0187 protein At2g45870, chloroplastic OS=Arabidopsis thaliana OX=3702 GN=At2g45870 PE=2 SV=1
TRINITY_DN29081_c0_g1_i8	0	0	0	0	0	0	0	0	0	0	0	0	0	0	7.93	0	0	0	0	0	0	0	0	0	0	0	0	0	0	0	0		YTYK2	DICDIProbable tyrosine-protein kinase DDB	G0283397 OS=Dictyostelium discoideum OX=44689 GN=DDB	G0283397 PE=3 SV=1
TRINITY_DN29081_c0_g1_i2	0	0	0	0	0	0	0	0	0	0	0	0	0	0	7.89	0	0	0	0	0	0	0	0	0	0	0	0	0	0	0	0		YTYK2	DICDIProbable tyrosine-protein kinase DDB	G0283397 OS=Dictyostelium discoideum OX=44689 GN=DDB	G0283397 PE=3 SV=1
TRINITY_DN29081_c0_g1_i14	0	0	0	0	0	0	0	0	0	0	0	0	0	0	21.7	0	0	0	0	0	0	0	0	0	0	0	0	0	0	0	0		YTYK2	DICDIProbable tyrosine-protein kinase DDB	G0283397 OS=Dictyostelium discoideum OX=44689 GN=DDB	G0283397 PE=3 SV=1
TRINITY_DN5385_c0_g1_i5	2.43	3	5.5	2.53	1.05	0	3.44	6.85	0	0	3.23	0.03	0	10.35	0	8.45	0	5	6.91	0	2.64	17.79	0	0	6.05	7.41	7.94	0.99	10.77	0	0		YTYK2	DICDIProbable tyrosine-protein kinase DDB	G0283397 OS=Dictyostelium discoideum OX=44689 GN=DDB	G0283397 PE=3 SV=1
TRINITY_DN29081_c0_g1_i1	0	0	0	0	0	0	0	0	0	0	0	0	0	0	16.12	0	0	0	0	0	0	0	0	0	0	0	0	0	0	0	0		YTYK2	DICDIProbable tyrosine-protein kinase DDB	G0283397 OS=Dictyostelium discoideum OX=44689 GN=DDB	G0283397 PE=3 SV=1
TRINITY_DN29081_c0_g1_i4	0	0	0	0	0	0	0	0	0	0	0	0	0	0	18.65	0	0	0	0	0	0	0	0	0	0	0	0	0	0	0	0		YTYK2	DICDIProbable tyrosine-protein kinase DDB	G0283397 OS=Dictyostelium discoideum OX=44689 GN=DDB	G0283397 PE=3 SV=1
TRINITY_DN5385_c0_g1_i4	0	0	1.85	0	0	0	0	2.63	0	0	0	1.86	0	0	0	0	0	0	0	0	0.36	0	0	0	0	0	1	0	1.99	0	0		YTYK2	DICDIProbable tyrosine-protein kinase DDB	G0283397 OS=Dictyostelium discoideum OX=44689 GN=DDB	G0283397 PE=3 SV=1
TRINITY_DN53840_c0_g1_i1	0	0	0	0	0	0	0	0	0	0	0	0	0	0	11	0	0	0	0	0	0	0	0	0	0	0	0	0	0	0	0		YTYK2	DICDIProbable tyrosine-protein kinase DDB	G0283397 OS=Dictyostelium discoideum OX=44689 GN=DDB	G0283397 PE=3 SV=1
TRINITY_DN146466_c0_g1_i1	0	1	0	1	0	0	0	0	0	0	0	0	0	0	0	0	0	0	0	0	0	0	0	0	0	0	0	0	0	0	0		YTXE	BACSUUncharacterized protein YtxE OS=Bacillus subtilis (strain 168) OX=224308 GN=ytxE PE=3 SV=1
TRINITY_DN132796_c0_g1_i1	0	1	1	0	0	0	0	0	0	0	0	0	0	0	0	0	0	0	0	0	0	0	0	0	0	0	0	0	0	0	0		YTNL	BACSUUncharacterized hydrolase YtnL OS=Bacillus subtilis (strain 168) OX=224308 GN=ytnL PE=3 SV=1
TRINITY_DN104901_c0_g1_i1	0	0	0	0	0	0	0	0	0	0	0	0	0	0	109	0	0	0	0	0	0	0	0	0	0	0	0	0	0	0	0		YTHD2	BOVINYTH domain-containing family protein 2 OS=Bos taurus OX=9913 GN=YTHDF2 PE=2 SV=1
TRINITY_DN1785_c0_g1_i21	87.88	72.79	115.23	79.03	54.46	94.04	69.81	35.5	58.73	70.57	5.91	48.56	180.08	85.95	2	119.92	50.59	13.6	87.95	107.39	39.4	91.2	87.94	56.44	50.14	63.41	33.53	56.98	23.6	0	25.92		YTHD2	BOVINYTH domain-containing family protein 2 OS=Bos taurus OX=9913 GN=YTHDF2 PE=2 SV=1
TRINITY_DN1785_c0_g1_i17	0	18.76	42.1	59.39	22.66	11.28	35.77	39.21	50.28	3.93	45.82	11.44	67.84	18.7	0	0	0	0	0	17.94	0	29.37	0	20.6	12.12	37.25	54.66	21.5	54.02	41.42	41.49		YTHD2	BOVINYTH domain-containing family protein 2 OS=Bos taurus OX=9913 GN=YTHDF2 PE=2 SV=1
TRINITY_DN66014_c0_g1_i1	0	0	0	0	0	0	0	0	0	0	0	0	0	0	0	0	0	0	0	1	0	1	0	0	0	0	0	0	0	0	0		YTFP	BACSUUncharacterized protein YtfP OS=Bacillus subtilis (strain 168) OX=224308 GN=ytfP PE=4 SV=2
TRINITY_DN63258_c0_g1_i1	3	3	6	1	4	4	8	6	7	2	1	2	4	4	1	7	3	1	12	13	6	12	4	20	13	27	10	13	9	0	1		YTE4	CAEELUncharacterized protein C09G1.4 OS=Caenorhabditis elegans OX=6239 GN=C09G1.4 PE=1 SV=3
TRINITY_DN14163_c1_g1_i1	0	0	0	0	0	0	0	0	1	1	0	0	0	0	0	0	0	0	1	0	0	0	0	0	0	0	0	0	0	0	0		YTDC1	HUMANYTH domain-containing protein 1 OS=Homo sapiens OX=9606 GN=YTHDC1 PE=1 SV=3
TRINITY_DN36998_c0_g1_i1	0	0	0	0	0	0	0	0	0	0	0	0	0	0	61.58	0	0	0	0	2	0	0	0	0	0	1	0	0	0	0	0		YTDC1	DROMEYTH domain-containing protein 1 OS=Drosophila melanogaster OX=7227 GN=Ythdc1 PE=2 SV=2
TRINITY_DN36998_c0_g1_i2	0	0	0	0	0	0	0	0	0	0	0	0	0	0	17.46	0	0	0	0	0	0	0	0	0	0	0	0	0	0	0	0		YTDC1	DROMEYTH domain-containing protein 1 OS=Drosophila melanogaster OX=7227 GN=Ythdc1 PE=2 SV=2
TRINITY_DN12535_c0_g1_i4	0	5.22	6.57	2.45	2	0	2.18	10.62	6.58	3.42	0	1.88	0	0	0	0	4.98	3.76	3.56	1.56	0	3.4	3.04	12.45	7.36	0	24	0	2	0	0		YTCB	PSESQUPF0065 protein in tcbD-tcbE intergenic region OS=Pseudomonas sp. (strain P51) OX=65067 PE=3 SV=1
TRINITY_DN12535_c0_g1_i2	0	5.22	0	2.45	0	4.82	0	2.66	0	3.39	3.02	1.88	5.98	0	0	0	0	0	7.14	1.56	5.75	3.38	3.04	0	0	5	0	0	2	0	0		YTCB	PSESQUPF0065 protein in tcbD-tcbE intergenic region OS=Pseudomonas sp. (strain P51) OX=65067 PE=3 SV=1
TRINITY_DN542_c0_g1_i19	7.61	21.24	7.63	19.93	5.57	0	4.36	3.12	14.17	8.28	0	0	8.76	0	0	1.52	8.36	0	8.02	5.24	0	6.89	4.12	18.21	7.64	10.27	17.39	9.68	18.54	9.18	24.88		YTBE	BACSUUncharacterized oxidoreductase YtbE OS=Bacillus subtilis (strain 168) OX=224308 GN=ytbE PE=1 SV=1
TRINITY_DN132903_c0_g1_i1	0	0	0	0	0	0	0	0	0	0	0	0	0	0	5	0	0	0	0	0	0	0	0	0	0	0	0	0	0	0	0		YTBE	BACSUUncharacterized oxidoreductase YtbE OS=Bacillus subtilis (strain 168) OX=224308 GN=ytbE PE=1 SV=1
TRINITY_DN542_c0_g1_i16	12.1	1.34	0	0	44.06	56.55	2.42	0	0	4.83	7.02	0	29.31	0	3.72	42.07	24.71	12	4.09	0	7.56	0.22	17.16	0	39.48	45.72	0	30.73	45.18	9.86	0		YTBE	BACSUUncharacterized oxidoreductase YtbE OS=Bacillus subtilis (strain 168) OX=224308 GN=ytbE PE=1 SV=1
TRINITY_DN542_c0_g1_i43	0	0	0	30.24	0	0	9.07	19.23	8.9	0	0	9.47	0	23.45	0	0	0	0	9.45	17.88	0	0	9.2	22.53	0	0	31.15	0	0	26.67	44.27		YTBE	BACSUUncharacterized oxidoreductase YtbE OS=Bacillus subtilis (strain 168) OX=224308 GN=ytbE PE=1 SV=1
TRINITY_DN542_c0_g1_i75	29.65	0	14.2	0	2.44	2.49	25.13	0.31	15.16	8.05	9.92	9	4.2	3.37	0	0	0	0	22.14	0	9.4	9.18	0.74	0	0	2.91	0	8.74	0	6.57	20.66		YTBE	BACSUUncharacterized oxidoreductase YtbE OS=Bacillus subtilis (strain 168) OX=224308 GN=ytbE PE=1 SV=1
TRINITY_DN542_c0_g1_i46	12.79	7.33	22.79	31.98	0	10.56	51.33	0	13.65	8.07	26.91	0	19.34	7.13	0	28.82	4.69	0	29.86	0	0	25.74	0	18.06	0	2.53	0	0	21.75	0	26.37		YTBE	BACSUUncharacterized oxidoreductase YtbE OS=Bacillus subtilis (strain 168) OX=224308 GN=ytbE PE=1 SV=1
TRINITY_DN100615_c0_g1_i1	0	0	0	0	2	0	0	0	0	0	0	0	0	0	0	0	0	0	0	0	0	0	0	0	0	0	0	0	0	0	0		YTA12	YEASTMitochondrial respiratory chain complexes assembly protein YTA12 OS=Saccharomyces cerevisiae (strain ATCC 204508 / S288c) OX=559292 GN=YTA12 PE=1 SV=2
TRINITY_DN1044_c2_g1_i11	0	7.75	0	5.9	6.35	6.18	8.37	0	0	2.18	7.1	0	4.89	13.58	1	4.54	0	0	0	23.08	0	2.82	0	5.32	2.82	5.06	0	0	0	2.95	4.16		YT45	CAEELUncharacterized protein B0416.5 OS=Caenorhabditis elegans OX=6239 GN=B0416.5 PE=4 SV=1
TRINITY_DN18130_c0_g1_i133	0	12.32	0	11.08	0	59.1	10.48	21.38	52.73	50.42	0	0	23.37	134.35	0.42	0	52.14	5.57	64.33	105.55	120.82	60.93	137.68	147.58	18.56	0	25.46	98.25	0	14.5	10.04		YSMU	CAEELUncharacterized protein F13E9.13, mitochondrial OS=Caenorhabditis elegans OX=6239 GN=F13E9.13 PE=3 SV=1
TRINITY_DN18130_c0_g1_i50	0	0	0	9.94	15.19	12.26	0	35.39	39.16	0	19.64	0	30.72	52.78	0	0	0	0	0	0	0	44.82	0	16.48	26.41	0	0	0	0	0	8.88		YSMU	CAEELUncharacterized protein F13E9.13, mitochondrial OS=Caenorhabditis elegans OX=6239 GN=F13E9.13 PE=3 SV=1
TRINITY_DN18130_c0_g1_i107	17.93	38.11	47.28	15.4	43.44	0	15.37	0	13.88	36.47	0	0	55.28	0	0	0	0	0	17.67	22.63	0	0	43.3	0	0	20.56	0	26.61	3.42	0	22.54		YSMU	CAEELUncharacterized protein F13E9.13, mitochondrial OS=Caenorhabditis elegans OX=6239 GN=F13E9.13 PE=3 SV=1
TRINITY_DN117245_c0_g1_i1	0	0	0	0	0	0	0	0	0	0	0	0	0	0	3	0	0	0	0	0	0	0	0	0	0	0	0	0	0	0	0		YSMU	CAEELUncharacterized protein F13E9.13, mitochondrial OS=Caenorhabditis elegans OX=6239 GN=F13E9.13 PE=3 SV=1
TRINITY_DN18130_c0_g1_i4	32.27	0	10.37	0	0	0	79.58	46.23	0	0	32.67	94.13	122.19	0	0	88.57	0	0	31.56	0	0	0	0	0	0	96.45	54.34	0	96.27	0	0		YSMU	CAEELUncharacterized protein F13E9.13, mitochondrial OS=Caenorhabditis elegans OX=6239 GN=F13E9.13 PE=3 SV=1
TRINITY_DN18130_c0_g1_i102	0	0	0	12.9	0	0	0	0	0	0	0	0	0	0	0	32.49	3.65	0	0	0	0	15.54	32.2	0	0	0	0	0	0	2.01	0		YSMU	CAEELUncharacterized protein F13E9.13, mitochondrial OS=Caenorhabditis elegans OX=6239 GN=F13E9.13 PE=3 SV=1
TRINITY_DN18130_c0_g1_i136	15.69	0	24.2	22.75	9.97	0	25.57	0	0	0	0	17.98	56.03	0	0	0	5.54	0	33.85	5.43	0	9.48	11.68	0	0	40.35	72.97	16.09	32.6	13.68	0		YSMU	CAEELUncharacterized protein F13E9.13, mitochondrial OS=Caenorhabditis elegans OX=6239 GN=F13E9.13 PE=3 SV=1
TRINITY_DN18130_c0_g1_i28	0	0	0	11.71	0	10.65	0	0	0	0	19.12	0	0	20.95	13.58	0	11.07	0	23.79	10.4	0	0	0	23.68	20.65	0	7.23	0	15.18	4.09	4.55		YSMU	CAEELUncharacterized protein F13E9.13, mitochondrial OS=Caenorhabditis elegans OX=6239 GN=F13E9.13 PE=3 SV=1
TRINITY_DN18130_c0_g1_i112	0	0	0	24.37	0	17.99	0	0	0	2.77	43.86	0	0	233.62	0	22.17	0	9.69	0	42.99	61.18	129.62	38.14	16.3	40.74	16.23	0	19.05	0	1.32	0		YSMU	CAEELUncharacterized protein F13E9.13, mitochondrial OS=Caenorhabditis elegans OX=6239 GN=F13E9.13 PE=3 SV=1
TRINITY_DN123107_c0_g1_i1	0	0	0	0	1	0	0	0	0	0	0	0	0	0	0	0	0	0	0	0	0	0	0	0	0	0	0	0	0	0	0		YSMA	BACSUUncharacterized protein YsmA OS=Bacillus subtilis (strain 168) OX=224308 GN=ysmA PE=4 SV=1
TRINITY_DN5297_c0_g1_i9	1.82	5	0	4	0	0	0	0	7	3	0	0	0	2	0	0	0	0	1.86	0	0	0	0	0	0	0	0	0	0	0	0		YSDA	BACSUUncharacterized protein YsdA OS=Bacillus subtilis (strain 168) OX=224308 GN=ysdA PE=4 SV=1
TRINITY_DN5297_c0_g1_i12	0.34	0	0	0	1	0	0	0	0	0	1	0	0	0	0	3.32	0	0	2.14	0	0	0	0	0	0	0	0	0	0	0	0		YSDA	BACSUUncharacterized protein YsdA OS=Bacillus subtilis (strain 168) OX=224308 GN=ysdA PE=4 SV=1
TRINITY_DN5297_c0_g1_i7	0	0	6	0	0	0	6	3	0	0	0	0	3.39	0	0	0	0	0	0	2.19	0	0	0	8	4	4	0	0	0	0	3		YSDA	BACSUUncharacterized protein YsdA OS=Bacillus subtilis (strain 168) OX=224308 GN=ysdA PE=4 SV=1
TRINITY_DN5297_c0_g1_i4	2.84	0	0	1	0	1	0	0	0	0	0	0	0	0	0	0	0	0	0	0	0	0	0	1.59	0	2.42	0	0	0	0	0		YSDA	BACSUUncharacterized protein YsdA OS=Bacillus subtilis (strain 168) OX=224308 GN=ysdA PE=4 SV=1
TRINITY_DN39038_c0_g1_i1	0	0	0	0	0	0	0	0	0	0	0	0	0	0	0	0	0	0	0	0	0	7	0	0	0	0	0	0	0	0	0		YSDA	BACSUUncharacterized protein YsdA OS=Bacillus subtilis (strain 168) OX=224308 GN=ysdA PE=4 SV=1
TRINITY_DN5297_c0_g1_i1	0	0	0	0	0	4	0	0	0	0	0	0	3.61	0	0	4	1	0	0	2.81	0	3	1	0	0	0	2	1	0	0	0		YSDA	BACSUUncharacterized protein YsdA OS=Bacillus subtilis (strain 168) OX=224308 GN=ysdA PE=4 SV=1
TRINITY_DN28702_c1_g1_i1	0	1	0	0	0	0	0	0	0	1	0	0	0	0	0	0	0	0	0	1	0	2	0	0	0	0	0	0	0	0	0		YSCQ	YERPEYop proteins translocation protein Q OS=Yersinia pestis OX=632 GN=yscQ PE=3 SV=1
TRINITY_DN69851_c0_g1_i1	0	0	0	0	0	0	1	0	0	1	0	0	0	0	0	0	0	0	0	1	0	0	0	0	0	0	0	0	1	0	0		YSCN	YERENProbable ATP synthase YscN OS=Yersinia enterocolitica OX=630 GN=yscN PE=1 SV=1
TRINITY_DN80267_c0_g1_i1	0	0	0	0	0	0	0	0	0	0	0	0	0	0	0	1	0	0	0	0	0	0	1	0	0	0	0	0	1	0	0		YSCJ	YERENYop proteins translocation lipoprotein J OS=Yersinia enterocolitica OX=630 GN=yscJ PE=2 SV=1
TRINITY_DN19263_c0_g1_i1	0	0	0	0	0	0	0	0	0	0	0	0	0	0	8	0	0	0	0	0	0	0	0	0	0	0	0	0	0	0	0		YS3J	CAEELPutative tyrosine-protein kinase F09A5.2 OS=Caenorhabditis elegans OX=6239 GN=F09A5.2 PE=3 SV=2
TRINITY_DN2926_c0_g1_i5	8.53	0	0	6.5	8.11	8.33	14.59	5.09	4.02	4.36	0	6.62	0	0	5	19.34	0	0	0	0	0	6.22	0	16.21	16.72	15.74	11.78	20.48	8.05	0.66	0		YS11	DROMEPutative gamma-glutamylcyclotransferase CG2811 OS=Drosophila melanogaster OX=7227 GN=CG2811 PE=2 SV=2
TRINITY_DN2926_c0_g1_i2	10.49	5.42	7.98	13.92	0	0	2.71	3.67	4.51	8.56	3.73	1.93	12.57	9.03	0	6.61	4.8	0	0	4.54	0	4.61	0	14.73	5.91	17.84	17.8	0	8.5	8.21	7.38		YS11	DROMEPutative gamma-glutamylcyclotransferase CG2811 OS=Drosophila melanogaster OX=7227 GN=CG2811 PE=2 SV=2
TRINITY_DN2926_c0_g1_i4	3.81	10.58	25.87	9	0	26.67	0	0	14.47	1.76	15.27	11.45	16.52	18.97	0	7.04	23.8	0	28.56	40.46	24	0	31	0	0	1.41	0	0	1.46	8.13	17.77		YS11	DROMEPutative gamma-glutamylcyclotransferase CG2811 OS=Drosophila melanogaster OX=7227 GN=CG2811 PE=2 SV=2
TRINITY_DN2926_c0_g1_i6	0	0	0	0	10.48	0	4.55	5.23	0	2.14	0	0	14.91	0	0	0	0	4.23	8.44	0	0	10.17	0	8.06	3.37	0	0	8.92	0	0	0		YS11	DROMEPutative gamma-glutamylcyclotransferase CG2811 OS=Drosophila melanogaster OX=7227 GN=CG2811 PE=2 SV=2
TRINITY_DN742_c1_g1_i4	42.01	39	109	24.32	47	0	17.4	28.99	38	0	21.99	25	38	36.29	0	15.12	0	8	0	27.83	0	39.13	28.36	8.3	33	40.62	0	0	13.68	0	0		YRKH	BACSUUncharacterized protein YrkH OS=Bacillus subtilis (strain 168) OX=224308 GN=yrkH PE=4 SV=2
TRINITY_DN742_c1_g1_i1	0	0	0	0	0	0	0.04	0.01	0	0	0.01	0	0	0	0	0	0	0	0	41.17	16	0	0	24.7	0	0	0	0	0.01	0	0		YRKH	BACSUUncharacterized protein YrkH OS=Bacillus subtilis (strain 168) OX=224308 GN=yrkH PE=4 SV=2
TRINITY_DN137255_c0_g1_i1	0	0	0	0	0	0	0	0	0	0	0	0	0	0	14	0	0	0	0	0	0	0	0	0	0	0	0	0	0	0	0		YRKH	BACSUUncharacterized protein YrkH OS=Bacillus subtilis (strain 168) OX=224308 GN=yrkH PE=4 SV=2
TRINITY_DN742_c1_g1_i2	0	0	0	54.68	0	66	21.56	0	0	21.9	0	0	0	39.71	0	35.88	18	0	50.24	0	0	10.87	30.64	0	0	14.38	44.38	38.99	32.31	4	4		YRKH	BACSUUncharacterized protein YrkH OS=Bacillus subtilis (strain 168) OX=224308 GN=yrkH PE=4 SV=2
TRINITY_DN59502_c0_g1_i1	0	0	1	1	0	0	0	0	0	0	0	0	0	0	0	0	0	0	0	0	0	0	0	0	0	0	0	0	0	0	0		YRKH	BACSUUncharacterized protein YrkH OS=Bacillus subtilis (strain 168) OX=224308 GN=yrkH PE=4 SV=2
TRINITY_DN17929_c0_g1_i31	0	0	1	2.25	0	1.22	0	1.12	0	2	0	0	0	1.08	0	0	0	0	1	0	0	1	0	2.39	0	1.14	0	1	0	0	2		YRK	CHICKProto-oncogene tyrosine-protein kinase Yrk OS=Gallus gallus OX=9031 GN=YRK PE=2 SV=2
TRINITY_DN17929_c0_g1_i29	1	0	0	1	0	0	0	0	0	0	0	1	0	0	0	0	0	0	0	0	0	0	0	0	0	1.22	0	0	0	0	1		YRK	CHICKProto-oncogene tyrosine-protein kinase Yrk OS=Gallus gallus OX=9031 GN=YRK PE=2 SV=2
TRINITY_DN101204_c0_g1_i1	0	0	0	0	0	0	1	0	0	0	0	0	0	0	0	0	0	0	0	0	0	0	1	0	0	0	0	0	0	0	0		YRHP	BACSUUncharacterized membrane protein YrhP OS=Bacillus subtilis (strain 168) OX=224308 GN=yrhP PE=3 SV=2
TRINITY_DN99335_c0_g1_i1	0	0	0	0	0	0	0	0	0	0	0	0	2	0	0	0	0	0	0	0	0	0	0	0	0	0	0	0	0	0	0		YRHL	BACSUPutative peptidoglycan O-acetyltransferase YrhL OS=Bacillus subtilis (strain 168) OX=224308 GN=yrhL PE=3 SV=1
TRINITY_DN3800_c0_g1_i1	6.97	0	0	7.41	0	12.75	0	8.21	0	3	2.11	0	0	0	0	3.17	0	0	0	9.01	2.88	21.03	1.46	0	0	0.05	0	3.59	0	0	0		YRDC	RATYrdC domain-containing protein, mitochondrial OS=Rattus norvegicus OX=10116 GN=Yrdc PE=2 SV=1
TRINITY_DN3800_c0_g1_i14	52.78	15.97	17.97	44.11	22.49	31.78	27.38	10.29	20.51	11	15.79	15.92	50.65	28.3	0	32.07	33.69	11	26.67	21.55	8.58	26.79	16.11	27.4	16.35	21.43	0	2.97	16.4	12.2	10.52		YRDC	MOUSEYrdC domain-containing protein, mitochondrial OS=Mus musculus OX=10090 GN=Yrdc PE=1 SV=1
TRINITY_DN3800_c0_g1_i13	0.52	16.73	14.84	0	0	4.63	0	0	0	0	0	0	0	0	0	0	4.88	0	0	15.9	0	0	0	6.62	4.3	0	16.24	16.49	0	0	0		YRDC	MOUSEYrdC domain-containing protein, mitochondrial OS=Mus musculus OX=10090 GN=Yrdc PE=1 SV=1
TRINITY_DN49867_c0_g1_i1	0	0	0	0	0	0	0	0	0	0	0	0	0	0	10	0	0	0	0	0	0	0	0	0	0	0	0	0	0	0	0		YRDC	BOVINYrdC domain-containing protein, mitochondrial OS=Bos taurus OX=9913 GN=YRDC PE=2 SV=1
TRINITY_DN4936_c0_g1_i3	92.33	61.02	42.1	109.31	19	67.12	97.42	109	247.23	148.48	59.34	109	157	98.83	5	41.73	56.24	6.69	70.38	27.18	8.85	31.29	59	39.12	25	60.76	78.91	50.43	14.26	13.85	16.28		YRD6	CAEELUncharacterized protein K02A2.6 OS=Caenorhabditis elegans OX=6239 GN=K02A2.6 PE=4 SV=1
TRINITY_DN16993_c0_g1_i21	0	5.57	0	0	0	0	0	0	0	0	0	0	0	0	0	0	0	0	0	3.15	0	0	0	0	0	0	0	0	0	19.07	8.58		YRD6	CAEELUncharacterized protein K02A2.6 OS=Caenorhabditis elegans OX=6239 GN=K02A2.6 PE=4 SV=1
TRINITY_DN12317_c0_g1_i1	0	1	0	0	0	0	0	1	0	0	0	0	1	0	0	0	1	0	0	0	0	0	2	0	0	0	1	0	3	0	1		YRD6	CAEELUncharacterized protein K02A2.6 OS=Caenorhabditis elegans OX=6239 GN=K02A2.6 PE=4 SV=1
TRINITY_DN14788_c0_g1_i1	0	1.92	1	0	0	0	0	0	0	0	1	0	0.5	0	0	0	0	0	0	0	0	0	1	2.81	1	0	0	0.3	1	0	0		YRD6	CAEELUncharacterized protein K02A2.6 OS=Caenorhabditis elegans OX=6239 GN=K02A2.6 PE=4 SV=1
TRINITY_DN13065_c0_g2_i2	0	6.05	0	2.76	2	0	0	9	3.53	0	0	1	0	10	0	19.55	0	0	46.41	0	11.68	16.58	0	0	0	0	0	32.26	32.13	0	0		YRD6	CAEELUncharacterized protein K02A2.6 OS=Caenorhabditis elegans OX=6239 GN=K02A2.6 PE=4 SV=1
TRINITY_DN9174_c0_g1_i29	0	2	0	0	0	0	4	0	0	0	2	0	8.31	0	0	0	0	0	0	0	0	0	0	1.51	0	15.38	19.56	0	0	0	0		YRD6	CAEELUncharacterized protein K02A2.6 OS=Caenorhabditis elegans OX=6239 GN=K02A2.6 PE=4 SV=1
TRINITY_DN14788_c0_g1_i11	0	2.94	0	1	0	0	5.97	1	1	3.36	0	2	0	0	0	0	2.62	0	0	1	1	2.18	0	5.69	0	8.26	9.65	4.52	0	0	0		YRD6	CAEELUncharacterized protein K02A2.6 OS=Caenorhabditis elegans OX=6239 GN=K02A2.6 PE=4 SV=1
TRINITY_DN5574_c0_g1_i8	4	0	0	0	4	2.27	0	0	0	5.09	8.8	0	0	0	0	0	3.5	1	8.06	0	0	9.52	5.66	0	0	5.87	0	0	8.24	6.64	0		YRD6	CAEELUncharacterized protein K02A2.6 OS=Caenorhabditis elegans OX=6239 GN=K02A2.6 PE=4 SV=1
TRINITY_DN34632_c0_g1_i1	0	0	0	0	0	1	0	0	0	0	0	2	0	0	0	0	0	1	0	0	0	1	0	0	0	2	0	0	1	1	0		YRD6	CAEELUncharacterized protein K02A2.6 OS=Caenorhabditis elegans OX=6239 GN=K02A2.6 PE=4 SV=1
TRINITY_DN48044_c2_g1_i14	1	4.97	5.27	0.59	1	1	0	2	0	0	0	2	0	4.12	0	2	0	0	0	1	0	1	1	4	2	0	0	2	4	1	1		YRD6	CAEELUncharacterized protein K02A2.6 OS=Caenorhabditis elegans OX=6239 GN=K02A2.6 PE=4 SV=1
TRINITY_DN10414_c0_g1_i1	0	0	1	0	0	1	0	1	0	0	0	0	4	0	0	12	0	0	1	1	0	4	0	0	0	0	0	0	0	0	0		YRD6	CAEELUncharacterized protein K02A2.6 OS=Caenorhabditis elegans OX=6239 GN=K02A2.6 PE=4 SV=1
TRINITY_DN10610_c0_g1_i61	0	0	0	0	0	0	0	3.39	0	0	1.08	0	0	2.36	0	0	0	0	5.1	0	0	0	0	0	0	0	0	0	0	0	0		YRD6	CAEELUncharacterized protein K02A2.6 OS=Caenorhabditis elegans OX=6239 GN=K02A2.6 PE=4 SV=1
TRINITY_DN12317_c1_g1_i1	0	0	0	0	0	0	0	0	0	0	0	0	0	0	0	7	0	0	0	0	0	2	0	0	0	0	0	4	0	0	1		YRD6	CAEELUncharacterized protein K02A2.6 OS=Caenorhabditis elegans OX=6239 GN=K02A2.6 PE=4 SV=1
TRINITY_DN144863_c0_g1_i1	0	0	0	0	0	0	0	0	0	0	0	0	0	0	4	0	0	0	0	0	0	0	0	0	0	0	0	0	0	0	0		YRD6	CAEELUncharacterized protein K02A2.6 OS=Caenorhabditis elegans OX=6239 GN=K02A2.6 PE=4 SV=1
TRINITY_DN10651_c0_g1_i5	21.75	15.53	10.23	57.34	27	31.5	35.15	10.03	14.54	3.16	14.1	13.14	6.53	0	0	0	0	0	0	0	0	0	4.81	31.41	9.65	0	3.44	0	0	3.24	6.24		YRD6	CAEELUncharacterized protein K02A2.6 OS=Caenorhabditis elegans OX=6239 GN=K02A2.6 PE=4 SV=1
TRINITY_DN13072_c0_g1_i1	0	0	0	0	0	0	0	0	0	0	0	0	0	0	0	0	0	0	0	0	0	0	0	0	0	0	0	0	0	0	0		YRD6	CAEELUncharacterized protein K02A2.6 OS=Caenorhabditis elegans OX=6239 GN=K02A2.6 PE=4 SV=1
TRINITY_DN14895_c0_g2_i2	0	2	0	0	0	0	0	0	0	0	0	0	0	0	0	0	0	0	0	0	0	0	0	0	0	0	0	1	0	0	1.17		YRD6	CAEELUncharacterized protein K02A2.6 OS=Caenorhabditis elegans OX=6239 GN=K02A2.6 PE=4 SV=1
TRINITY_DN48044_c2_g1_i8	0	4.03	0	2.15	0	0	0	0	0	0	5	0	6.67	3.88	0	0	0	0	6.31	0	0	0	0	0	0	17.86	0	0	0	0	0		YRD6	CAEELUncharacterized protein K02A2.6 OS=Caenorhabditis elegans OX=6239 GN=K02A2.6 PE=4 SV=1
TRINITY_DN86631_c0_g1_i1	0	0	0	0	0	0	0	0	0	0	0	0	0	0	2	0	0	0	0	0	0	0	0	0	0	0	0	0	0	0	0		YRD6	CAEELUncharacterized protein K02A2.6 OS=Caenorhabditis elegans OX=6239 GN=K02A2.6 PE=4 SV=1
TRINITY_DN3546_c0_g1_i10	3.74	0	0	0	0	4.54	2.1	20.98	53.64	0	9.69	16.02	37.02	13.4	0	91.42	9.25	19.92	57.34	23.55	60.46	44.16	14.37	42.41	26.15	69.75	73.69	22.5	85.86	0	0		YRD6	CAEELUncharacterized protein K02A2.6 OS=Caenorhabditis elegans OX=6239 GN=K02A2.6 PE=4 SV=1
TRINITY_DN76686_c0_g1_i1	0	0	0	0	0	0	0	0	0	0	0	0	0	0	6	0	0	0	0	0	0	0	0	0	0	0	0	0	0	0	0		YRD6	CAEELUncharacterized protein K02A2.6 OS=Caenorhabditis elegans OX=6239 GN=K02A2.6 PE=4 SV=1
TRINITY_DN81795_c0_g1_i1	0	0	0	0	0	0	0	0	0	0	0	0	0	0	3	0	0	0	0	0	0	0	0	0	0	0	0	0	0	0	0		YRD6	CAEELUncharacterized protein K02A2.6 OS=Caenorhabditis elegans OX=6239 GN=K02A2.6 PE=4 SV=1
TRINITY_DN14788_c0_g1_i10	2	0	0	0	0	0	0	0	0	0	0	0	2.5	0	0	0	0	0	0	1	0	0	0	1.72	4	0	0	3.45	0	0	0		YRD6	CAEELUncharacterized protein K02A2.6 OS=Caenorhabditis elegans OX=6239 GN=K02A2.6 PE=4 SV=1
TRINITY_DN93733_c0_g1_i1	0	0	0	0	0	0	0	0	0	0	0	0	0	0	3	0	0	0	0	0	0	0	0	0	0	0	0	0	0	0	0		YRD6	CAEELUncharacterized protein K02A2.6 OS=Caenorhabditis elegans OX=6239 GN=K02A2.6 PE=4 SV=1
TRINITY_DN14895_c0_g1_i39	51.07	0	0	0	0	0	0	0	12.38	0	0	17.34	0	0	0	0	0	0	0	0	0	14.02	0	0	0	0	0	0	0	0	0		YRD6	CAEELUncharacterized protein K02A2.6 OS=Caenorhabditis elegans OX=6239 GN=K02A2.6 PE=4 SV=1
TRINITY_DN9174_c0_g1_i15	0	0	0	0	0	0	0	0	170.06	0	0	0	0	0	0	0	0	0	0	0	0	3	0	23.43	0	0	0	0	0	0	1.28		YRD6	CAEELUncharacterized protein K02A2.6 OS=Caenorhabditis elegans OX=6239 GN=K02A2.6 PE=4 SV=1
TRINITY_DN2861_c0_g1_i3	0	0	6.55	0	0	0	0	0	0	0	0	0	44.33	0	0	0	0	0	0	0	0	0	0	0	0	11.43	0	0	0	0	0		YRD6	CAEELUncharacterized protein K02A2.6 OS=Caenorhabditis elegans OX=6239 GN=K02A2.6 PE=4 SV=1
TRINITY_DN10610_c0_g1_i57	0	0	0	0	0	10.03	0	2.38	0	0	0	0	10.15	0.61	0	0	0	0	0	0	6.06	0	0	0	0	0	14.85	0	1.48	0	0		YRD6	CAEELUncharacterized protein K02A2.6 OS=Caenorhabditis elegans OX=6239 GN=K02A2.6 PE=4 SV=1
TRINITY_DN8058_c0_g1_i4	0	0	0	0	0	1	0	0	0	0	1	0	3	0	0	0	0	0	0	0	0	0	0	0	2	1	0	0	1	0	0		YRD6	CAEELUncharacterized protein K02A2.6 OS=Caenorhabditis elegans OX=6239 GN=K02A2.6 PE=4 SV=1
TRINITY_DN10610_c0_g1_i53	1	1	0	0	0	0	0	0	0	2.78	0	4.07	0	0	0	0	0	0	2.7	0	0	0	2	0	0	0	0	2	0	0	0		YRD6	CAEELUncharacterized protein K02A2.6 OS=Caenorhabditis elegans OX=6239 GN=K02A2.6 PE=4 SV=1
TRINITY_DN97105_c0_g1_i1	0	0	0	0	0	0	0	0	0	2	0	0	0	0	0	0	0	0	0	0	0	0	0	0	0	0	0	0	0	0	0		YRD6	CAEELUncharacterized protein K02A2.6 OS=Caenorhabditis elegans OX=6239 GN=K02A2.6 PE=4 SV=1
TRINITY_DN17170_c0_g1_i20	0	5	2	0	0	1	0	0	0	0	1.32	0	0	1	0	0	0	0	0	0	1	0	0	3.92	0	0	1	1	0	0	0		YRD6	CAEELUncharacterized protein K02A2.6 OS=Caenorhabditis elegans OX=6239 GN=K02A2.6 PE=4 SV=1
TRINITY_DN16135_c0_g1_i5	0	0	0	0	0	0	0	0	0	0	0	0	2.98	2.37	0	1.45	0	0	0	0	0	0	0	0	0	0	0	0	0	0	0.18		YRD6	CAEELUncharacterized protein K02A2.6 OS=Caenorhabditis elegans OX=6239 GN=K02A2.6 PE=4 SV=1
TRINITY_DN14895_c0_g1_i37	5.62	0	0	5.36	0	0	0	0	2.35	0	4	5.62	0	0	3	0	0	0	1.2	3	2.68	5.21	7	15.78	3.36	0	0	2.45	0	0	4.43		YRD6	CAEELUncharacterized protein K02A2.6 OS=Caenorhabditis elegans OX=6239 GN=K02A2.6 PE=4 SV=1
TRINITY_DN743_c1_g1_i18	0	19.5	0	0	177.82	0	0	0	80.8	0	0	80.6	287.67	0	58.35	441.56	0	0	0	0	0	0	800.83	0	0	0	0	0	20.24	0	0		YRD6	CAEELUncharacterized protein K02A2.6 OS=Caenorhabditis elegans OX=6239 GN=K02A2.6 PE=4 SV=1
TRINITY_DN2861_c0_g1_i16	0	0	0	0	0	0.68	7.03	3.24	1	1	0	3.1	10.71	3	0	0	0	0	1.51	9.69	0	5.45	0	5.73	0	0	0	4.59	1.26	0	1		YRD6	CAEELUncharacterized protein K02A2.6 OS=Caenorhabditis elegans OX=6239 GN=K02A2.6 PE=4 SV=1
TRINITY_DN2861_c0_g1_i11	0	0	0	0	0	0	0	0	0	0	0	0	0	0	0	56.39	0	0	11.99	0	0	3.64	0	0	0	0	0	0	0	0	0		YRD6	CAEELUncharacterized protein K02A2.6 OS=Caenorhabditis elegans OX=6239 GN=K02A2.6 PE=4 SV=1
TRINITY_DN24020_c0_g1_i14	1	0	1	0	0	0	0	0	0	0	0	0	1	2	0	0	0	0	0	0	0	2	1	1	0	0	0	0.67	0	3	1		YRD6	CAEELUncharacterized protein K02A2.6 OS=Caenorhabditis elegans OX=6239 GN=K02A2.6 PE=4 SV=1
TRINITY_DN0_c11_g1_i10	5.41	9.12	6.43	7.51	3	7.61	6.43	0	6.62	2.36	10.44	16.5	71.03	8.53	1	11.72	6.12	2.26	27.14	26.3	30.34	7.34	13.28	7.58	11.01	1.05	94.74	142.48	24.39	667.11	990.06		YRD6	CAEELUncharacterized protein K02A2.6 OS=Caenorhabditis elegans OX=6239 GN=K02A2.6 PE=4 SV=1
TRINITY_DN7080_c0_g1_i17	0	0	4.15	0	0	0	0	0	0	0	0	0	0.5	0	0	1.31	0	0	0	0	0	0	0	0	2.52	0	0	0	3.6	0	0		YRD6	CAEELUncharacterized protein K02A2.6 OS=Caenorhabditis elegans OX=6239 GN=K02A2.6 PE=4 SV=1
TRINITY_DN3546_c0_g1_i7	0	0	0	0	0	0	2.27	21.33	0	12.43	0	23.63	101.89	37.94	0	63.17	9.19	0	66.72	20.36	18.55	25.17	12.77	21.77	26.8	234.39	0	15.25	63.23	10.3	0		YRD6	CAEELUncharacterized protein K02A2.6 OS=Caenorhabditis elegans OX=6239 GN=K02A2.6 PE=4 SV=1
TRINITY_DN6114_c2_g1_i3	0	0	0	0	0	0	0	1.25	0	1	0	1	0	0	0	0	0	0	0	0	0	2	2	2	2	0	0.99	0	0	0	0		YRD6	CAEELUncharacterized protein K02A2.6 OS=Caenorhabditis elegans OX=6239 GN=K02A2.6 PE=4 SV=1
TRINITY_DN144627_c0_g1_i1	0	0	0	0	0	0	0	0	0	2	0	0	0	0	0	0	0	0	0	0	0	0	0	0	0	0	0	0	0	0	0		YRD6	CAEELUncharacterized protein K02A2.6 OS=Caenorhabditis elegans OX=6239 GN=K02A2.6 PE=4 SV=1
TRINITY_DN50657_c0_g1_i1	0	0	0	0	0	1	0	0	0	0	0	0	0	0	0	0	0	0	0	0	0	2	0	0	0	0	0	0	0	0	0		YRD6	CAEELUncharacterized protein K02A2.6 OS=Caenorhabditis elegans OX=6239 GN=K02A2.6 PE=4 SV=1
TRINITY_DN14895_c0_g1_i1	3.07	0	0	0	0	0	0	0	0	1	0	0	0	0	0	0	0	0	1.25	0	0	0	0	4.82	2.24	0	0	0	1	0	0		YRD6	CAEELUncharacterized protein K02A2.6 OS=Caenorhabditis elegans OX=6239 GN=K02A2.6 PE=4 SV=1
TRINITY_DN743_c1_g1_i6	0	11.45	117.14	38.02	311.56	1080.53	130	577.52	699.4	29	32.11	75.91	1179.88	747.03	0	3790.43	553.68	434.38	883.96	1177.13	814.68	1299.36	762.93	2329.24	680.71	1501.6	217.96	437.29	418.76	43.88	111.21		YRD6	CAEELUncharacterized protein K02A2.6 OS=Caenorhabditis elegans OX=6239 GN=K02A2.6 PE=4 SV=1
TRINITY_DN20527_c0_g1_i14	0	0	1	1.36	0	0	0	0	0	0	0	1	1	1.71	0	0	0	0	4	2	0	0	1	0	2	1	2	0	0	1	0		YRD6	CAEELUncharacterized protein K02A2.6 OS=Caenorhabditis elegans OX=6239 GN=K02A2.6 PE=4 SV=1
TRINITY_DN78654_c0_g1_i1	0	0	0	0	0	0	14	0	0	0	0	0	19	0	0	0	0	0	0	0	0	0	0	0	0	0	0	0	0	0	0		YRD6	CAEELUncharacterized protein K02A2.6 OS=Caenorhabditis elegans OX=6239 GN=K02A2.6 PE=4 SV=1
TRINITY_DN9174_c0_g1_i4	0	1	0	1	2	0	0	1	0	0	0	1	2.98	1	0	1	0	0	0	1	0	0	1	0	1	0	0	0	0	2.1	4.87		YRD6	CAEELUncharacterized protein K02A2.6 OS=Caenorhabditis elegans OX=6239 GN=K02A2.6 PE=4 SV=1
TRINITY_DN13583_c0_g1_i4	0	0	0	0	0	0	0	0	0	0	0	0	0	0	0	0	0	0	0	0	0	0	0	0	0	0	0	0	0	0	0		YRD6	CAEELUncharacterized protein K02A2.6 OS=Caenorhabditis elegans OX=6239 GN=K02A2.6 PE=4 SV=1
TRINITY_DN28395_c4_g1_i1	0	1	1	0	0	0	2	0	0	0	1	0	0	3	0	1	0	1	1	0	0	0	2	0	1	0	0	0	0	0	1		YRD6	CAEELUncharacterized protein K02A2.6 OS=Caenorhabditis elegans OX=6239 GN=K02A2.6 PE=4 SV=1
TRINITY_DN2224_c0_g1_i22	0	0	0	0	0	0	0	0	1	0	0	0	0	1	0	0	0	0	0	0	0	0	0	0	0	0	1.5	0	0	0	0		YRD6	CAEELUncharacterized protein K02A2.6 OS=Caenorhabditis elegans OX=6239 GN=K02A2.6 PE=4 SV=1
TRINITY_DN7080_c0_g1_i1	6.76	9.96	13.78	0	0	11.78	2.36	4.28	5.62	0	0	0	4.5	5.16	0	4.01	0	0	5.31	5.56	3.41	0	0	10	0	0	0	0	6.54	6.12	0		YRD6	CAEELUncharacterized protein K02A2.6 OS=Caenorhabditis elegans OX=6239 GN=K02A2.6 PE=4 SV=1
TRINITY_DN38080_c0_g1_i1	0	0	0	0	0	0	0	0	0	0	0	0	0	0	9	0	0	0	0	0	0	0	0	0	0	0	0	0	0	0	0		YRD6	CAEELUncharacterized protein K02A2.6 OS=Caenorhabditis elegans OX=6239 GN=K02A2.6 PE=4 SV=1
TRINITY_DN28842_c0_g2_i2	0	0	2	0	0	5	0	0	0	0	0	0	0	2.45	0	4	0	0	0	6	0	0	0	3.68	3	0	0	6.36	0	0	0		YRD6	CAEELUncharacterized protein K02A2.6 OS=Caenorhabditis elegans OX=6239 GN=K02A2.6 PE=4 SV=1
TRINITY_DN20304_c0_g1_i1	0	0	0	0	0	0	0	0	0	0	0	0	0	0	0	0	0	0	0	0	0	0	0	0	0	0	0	0	0	0	0		YRD6	CAEELUncharacterized protein K02A2.6 OS=Caenorhabditis elegans OX=6239 GN=K02A2.6 PE=4 SV=1
TRINITY_DN9174_c0_g1_i6	0	0	0	0	0	0	0	0	0	0	1	0	0	0	0	0	0	0	0	0	0	0	0	7.83	0	8.62	4.37	0	0	1	1.8		YRD6	CAEELUncharacterized protein K02A2.6 OS=Caenorhabditis elegans OX=6239 GN=K02A2.6 PE=4 SV=1
TRINITY_DN13583_c0_g1_i3	1	4	17	12	13	6	21	1	51	0	0	0	18	9	5	117	12	4	99	45	28	68	23	26	19	19	1	16	12	8	19		YRD6	CAEELUncharacterized protein K02A2.6 OS=Caenorhabditis elegans OX=6239 GN=K02A2.6 PE=4 SV=1
TRINITY_DN10414_c0_g1_i2	0	0	0	0	0	0	0	0	1	0	0	0	0	0	0	0	0	0	0	0	0	0	0	0	0	0	0	0	0	1	0		YRD6	CAEELUncharacterized protein K02A2.6 OS=Caenorhabditis elegans OX=6239 GN=K02A2.6 PE=4 SV=1
TRINITY_DN3546_c0_g1_i4	0	0	41.81	0	16.14	0	17.05	98.23	184.01	0	0	45.77	0	44.05	0	0	0	43.03	0	0	0	422.49	39.49	593.29	218.53	41.15	150.98	20.73	345.73	0	0		YRD6	CAEELUncharacterized protein K02A2.6 OS=Caenorhabditis elegans OX=6239 GN=K02A2.6 PE=4 SV=1
TRINITY_DN7080_c0_g1_i23	4.59	0	0	4.93	0	0	0	0.11	9.44	4	2.75	1.53	0	5.07	0	0	2.7	2	0	4.98	0	9.17	0	0	0	4	4.2	4.53	6.56	0	3.5		YRD6	CAEELUncharacterized protein K02A2.6 OS=Caenorhabditis elegans OX=6239 GN=K02A2.6 PE=4 SV=1
TRINITY_DN34362_c0_g1_i14	0	0	1	1	0	1	0	0	0	0	0	0	4.9	0	0	0	1	0	0	0	0	0	0	0	0	0	0	0	1	0	0		YRD6	CAEELUncharacterized protein K02A2.6 OS=Caenorhabditis elegans OX=6239 GN=K02A2.6 PE=4 SV=1
TRINITY_DN207_c0_g1_i24	21.95	0	0	10.15	14.21	6.01	17.21	18.38	13.97	16.56	0	0	15	0	2.83	14.52	7.98	4	27.42	18.81	23.8	15.28	0	0	21.33	19.02	16.42	5.2	16.94	0	0		YRD6	CAEELUncharacterized protein K02A2.6 OS=Caenorhabditis elegans OX=6239 GN=K02A2.6 PE=4 SV=1
TRINITY_DN48044_c2_g1_i6	0	0	0	2.26	0	0	0	0	4	0	0	0	8.33	0	0	0	0	0	0	0	0	0	0	0	0	0	2	0	0	0	0		YRD6	CAEELUncharacterized protein K02A2.6 OS=Caenorhabditis elegans OX=6239 GN=K02A2.6 PE=4 SV=1
TRINITY_DN7174_c0_g2_i1	0	0	0	0	0	0	0	0	0	0	0	0	0	0	0	0	0	0	1	2	0	2	0	2	1	1	0	2	1	0	0		YRD6	CAEELUncharacterized protein K02A2.6 OS=Caenorhabditis elegans OX=6239 GN=K02A2.6 PE=4 SV=1
TRINITY_DN743_c1_g1_i15	0	0	88.32	0	159.36	0	0	99.66	0	0	0	15.54	264.6	0	0	88.14	34.1	0	470.23	0	88.26	0	0	0	88.28	0	0	0	0	0	0		YRD6	CAEELUncharacterized protein K02A2.6 OS=Caenorhabditis elegans OX=6239 GN=K02A2.6 PE=4 SV=1
TRINITY_DN67976_c0_g1_i1	0	0	0	0	0	0	0	0	0	0	0	0	0	0	5	0	0	0	0	0	0	0	0	0	0	0	0	0	0	0	0		YRD6	CAEELUncharacterized protein K02A2.6 OS=Caenorhabditis elegans OX=6239 GN=K02A2.6 PE=4 SV=1
TRINITY_DN24020_c0_g1_i34	0	0	0	0	0	0	0	0	0	0	0	0	0	0	0	0	0	0	0	0	0	0	0	0	0	0	0	0	0	0	0		YRD6	CAEELUncharacterized protein K02A2.6 OS=Caenorhabditis elegans OX=6239 GN=K02A2.6 PE=4 SV=1
TRINITY_DN207_c0_g1_i16	28.23	8.52	0	235.87	0	1.18	41.96	0	33.52	12.12	34.83	7.1	64.92	5.17	0	51.19	16.48	0	84.54	12.19	6.72	19.67	0	17.37	4.29	11.57	36.5	0	0	0	0		YRD6	CAEELUncharacterized protein K02A2.6 OS=Caenorhabditis elegans OX=6239 GN=K02A2.6 PE=4 SV=1
TRINITY_DN21135_c0_g1_i3	0	0	0	0	0	0	0	0	0	0	0	0	0	0	0	1	0	0	0	0	0	1	1	0	0	0	0	0	0	0	0		YRD6	CAEELUncharacterized protein K02A2.6 OS=Caenorhabditis elegans OX=6239 GN=K02A2.6 PE=4 SV=1
TRINITY_DN10610_c0_g1_i33	0	0	0	0	5.66	4.72	0	0	0	3.79	0	3.66	9.16	0	0	0	0	0	1	0	0	0	0	0	0	0	0	0	0	0	2.21		YRD6	CAEELUncharacterized protein K02A2.6 OS=Caenorhabditis elegans OX=6239 GN=K02A2.6 PE=4 SV=1
TRINITY_DN34316_c0_g1_i1	0	0	0	0	0	0	0	0	0	0	0	0	0	0	0	0	0	0	0	0	0	0	0	3	1	0	2	0	0	0	0		YRD6	CAEELUncharacterized protein K02A2.6 OS=Caenorhabditis elegans OX=6239 GN=K02A2.6 PE=4 SV=1
TRINITY_DN40552_c0_g2_i7	10.07	2.7	3.63	7.71	5.57	12.94	1.26	5.29	9.92	0	1.92	0.81	6.34	1	0	9.54	9.9	0	12.24	5.26	1.78	17.88	0	2.41	14.64	10.5	3.07	15.1	11.11	0	0.77		YRD6	CAEELUncharacterized protein K02A2.6 OS=Caenorhabditis elegans OX=6239 GN=K02A2.6 PE=4 SV=1
TRINITY_DN743_c1_g1_i9	0	0	71.27	0	0	36.74	0	0	96.15	0	0	0	0	87.87	0	27.53	0	0	452.4	124.58	196.37	51.34	407.81	225.19	65.11	49.12	53.27	145.39	0	12.09	13.18		YRD6	CAEELUncharacterized protein K02A2.6 OS=Caenorhabditis elegans OX=6239 GN=K02A2.6 PE=4 SV=1
TRINITY_DN9174_c0_g1_i21	0	0	0	0	0	0	3	0	37.94	0	0	0	0	0	0	0	0	0	0	0	0	0	0	0	0	0	0	0	0	0	0		YRD6	CAEELUncharacterized protein K02A2.6 OS=Caenorhabditis elegans OX=6239 GN=K02A2.6 PE=4 SV=1
TRINITY_DN106513_c0_g1_i1	0	0	0	0	0	0	0	0	0	0	0	0	0	0	7	0	0	0	0	0	0	0	0	0	0	0	0	0	0	0	0		YRD6	CAEELUncharacterized protein K02A2.6 OS=Caenorhabditis elegans OX=6239 GN=K02A2.6 PE=4 SV=1
TRINITY_DN207_c0_g1_i30	0	0	0	7.1	9.35	5.68	8.81	5.38	19.64	0	9.04	0	0	7.92	0	40.61	5.1	0	26.46	0	3.31	0	0	0	0	3.62	0	0	0	3.96	0		YRD6	CAEELUncharacterized protein K02A2.6 OS=Caenorhabditis elegans OX=6239 GN=K02A2.6 PE=4 SV=1
TRINITY_DN12848_c0_g1_i53	0	0	0	0	0	0	0	0	0	1.17	0	0	0	0	0	0	0	0	0	0	1	0	0	0	0	0	0	0.8	1.57	0	0		YRD6	CAEELUncharacterized protein K02A2.6 OS=Caenorhabditis elegans OX=6239 GN=K02A2.6 PE=4 SV=1
TRINITY_DN29124_c0_g1_i10	0	2	2	0	0	0	0	0	0	0	1	0	0	0	0	0	0	0	0	0	0	0	1	0	0	0	0	0	0	0	0		YRD6	CAEELUncharacterized protein K02A2.6 OS=Caenorhabditis elegans OX=6239 GN=K02A2.6 PE=4 SV=1
TRINITY_DN17170_c0_g1_i16	0	0	0	0	0	0	0	0	0	0	0	0	6.85	0	0	0	0	0	5.19	0	0	0	0	0	0	0	0	0	1.33	0	2		YRD6	CAEELUncharacterized protein K02A2.6 OS=Caenorhabditis elegans OX=6239 GN=K02A2.6 PE=4 SV=1
TRINITY_DN743_c1_g1_i11	61	29.05	1529.83	39.98	1154.78	689.74	0	0	519.66	0	15.89	11.94	194.62	284.11	82.65	346.26	676.46	393.17	282.51	1639	1189.06	1055.79	862.58	712.57	1330.45	913.28	260.83	735.78	0	95.03	94.56		YRD6	CAEELUncharacterized protein K02A2.6 OS=Caenorhabditis elegans OX=6239 GN=K02A2.6 PE=4 SV=1
TRINITY_DN10651_c0_g1_i2	0	0	0	0	0	0	0	0	10.71	0	0	13.72	7.96	2	1	2.21	2.81	0	13.25	0	3.46	0	0	0	0	6.78	0	15.14	3.36	0	0		YRD6	CAEELUncharacterized protein K02A2.6 OS=Caenorhabditis elegans OX=6239 GN=K02A2.6 PE=4 SV=1
TRINITY_DN10414_c0_g2_i1	0	1	2	1	0	1	0	1	0	0	0	0	11	0	0	14	0	0	1	1	0	1	0	0	1	0	0	0	0	0	2		YRD6	CAEELUncharacterized protein K02A2.6 OS=Caenorhabditis elegans OX=6239 GN=K02A2.6 PE=4 SV=1
TRINITY_DN17170_c0_g1_i44	0	0	0	0	0	0	0	0	0	0	0	0	0	0	0	0	0	0	0	0	0	2	0	0	0	0	0	0	0	0	0		YRD6	CAEELUncharacterized protein K02A2.6 OS=Caenorhabditis elegans OX=6239 GN=K02A2.6 PE=4 SV=1
TRINITY_DN9574_c0_g1_i3	0	0	0	0	0	0	0	0	0	0	0	0	0	0	0	0	0	0	0	0	0	0	0	0	0	0	0	0.86	0	9.11	10.99		YRD6	CAEELUncharacterized protein K02A2.6 OS=Caenorhabditis elegans OX=6239 GN=K02A2.6 PE=4 SV=1
TRINITY_DN2861_c0_g1_i25	0	0	0	0	0	3.79	3.34	0	0	0	1	0	0	0	0	0	1.89	0	0	3.55	0	0	5	3.27	7.53	0	2.63	2.59	0	1.9	0		YRD6	CAEELUncharacterized protein K02A2.6 OS=Caenorhabditis elegans OX=6239 GN=K02A2.6 PE=4 SV=1
TRINITY_DN90205_c0_g1_i1	0	0	0	1	0	0	0	0	0	2	0	0	0	0	0	0	0	0	0	0	0	0	0	0	0	0	0	0	0	0	0		YRD6	CAEELUncharacterized protein K02A2.6 OS=Caenorhabditis elegans OX=6239 GN=K02A2.6 PE=4 SV=1
TRINITY_DN17170_c0_g1_i54	1	0	0	0	0	0	0	1	0	0	0	0	0	0	0	0	0	0	0	1	0	0	0	1.12	0	0	0	0	0	0	0		YRD6	CAEELUncharacterized protein K02A2.6 OS=Caenorhabditis elegans OX=6239 GN=K02A2.6 PE=4 SV=1
TRINITY_DN9174_c0_g3_i1	0	1	1	0	0	0	0	0	0	0	0	0	2	0	0	1	0	0	0	0	0	0	0	1	0	0	1	0	0	0	0		YRD6	CAEELUncharacterized protein K02A2.6 OS=Caenorhabditis elegans OX=6239 GN=K02A2.6 PE=4 SV=1
TRINITY_DN306_c0_g1_i2	0	82	500.89	261.4	336.99	101	484.78	1301.05	179.34	26.84	8.44	0	2848.63	944.79	119	2490.92	500.61	260.38	2049.92	733.92	1336.29	1853.66	2349.04	2813.81	1446	807	206	1463.55	1534.83	304	738		YRD6	CAEELUncharacterized protein K02A2.6 OS=Caenorhabditis elegans OX=6239 GN=K02A2.6 PE=4 SV=1
TRINITY_DN14895_c0_g1_i9	9.82	0	0	0	0	0	0	0	9.49	0	0	10.73	5.53	0	0	0	0	0	0	0	0	0	0	0	0	0	0	0	0	0	0		YRD6	CAEELUncharacterized protein K02A2.6 OS=Caenorhabditis elegans OX=6239 GN=K02A2.6 PE=4 SV=1
TRINITY_DN116100_c0_g1_i1	0	0	0	0	0	0	0	0	0	0	0	0	0	0	0	0	0	0	0	0	0	0	0	0	0	0	0	0	0	0	0		YRD6	CAEELUncharacterized protein K02A2.6 OS=Caenorhabditis elegans OX=6239 GN=K02A2.6 PE=4 SV=1
TRINITY_DN4936_c0_g1_i18	7.96	16.98	4.52	6.98	0	3.9	16.37	0	13.17	4.73	6.22	0	0	10.99	0	1.89	3.66	1.6	3.28	8.14	2.91	2.15	0	11.64	0	13.87	13.29	0.71	4.86	8.38	3.43		YRD6	CAEELUncharacterized protein K02A2.6 OS=Caenorhabditis elegans OX=6239 GN=K02A2.6 PE=4 SV=1
TRINITY_DN2861_c0_g1_i18	0	0	0	0	0	0	1.26	0	0	0	0	0	0	0	0	0	0	0	0.92	0	0	0	0	0	0	0	0.37	0	0	0	0		YRD6	CAEELUncharacterized protein K02A2.6 OS=Caenorhabditis elegans OX=6239 GN=K02A2.6 PE=4 SV=1
TRINITY_DN69359_c0_g1_i1	0	0	0	0	0	0	0	0	0	0	0	0	0	0	2	0	0	0	0	0	0	0	0	0	0	0	0	0	0	0	0		YRD6	CAEELUncharacterized protein K02A2.6 OS=Caenorhabditis elegans OX=6239 GN=K02A2.6 PE=4 SV=1
TRINITY_DN207_c0_g1_i10	0	0	0	0	0	0	0	0	0	0	3.91	0	0	35.34	0	26.72	0	0	0	0	0	0	7.82	0	0	0	0	0	0	0	5.6		YRD6	CAEELUncharacterized protein K02A2.6 OS=Caenorhabditis elegans OX=6239 GN=K02A2.6 PE=4 SV=1
TRINITY_DN2224_c0_g1_i63	0	0	6	3	0	0	15	0	0	2	0	0	3	0	0	0	0	1	0	0	3	4.39	3	7	7	4	3.5	0	4	0	0		YRD6	CAEELUncharacterized protein K02A2.6 OS=Caenorhabditis elegans OX=6239 GN=K02A2.6 PE=4 SV=1
TRINITY_DN8346_c0_g1_i5	0	0	0	0	5	5	0	0	0	0	0	0	6.01	1.25	0	0	0	0	6	0	0	0	0	0	0	0	0	0	0	0	0		YRD6	CAEELUncharacterized protein K02A2.6 OS=Caenorhabditis elegans OX=6239 GN=K02A2.6 PE=4 SV=1
TRINITY_DN14895_c0_g3_i1	5.81	0	0	5.67	0	0	0	0	0	0	0	0	0	0	0	0	0	0	0	0	0	4.05	0	6.55	1.32	0	1	0	0	0	0		YRD6	CAEELUncharacterized protein K02A2.6 OS=Caenorhabditis elegans OX=6239 GN=K02A2.6 PE=4 SV=1
TRINITY_DN0_c11_g1_i7	0	0	0	0	0	0	0	12.57	0	0	0	0	0	0	0	0	0	0	0	0	0	0	0	0	0	0	0	0	0	0	0		YRD6	CAEELUncharacterized protein K02A2.6 OS=Caenorhabditis elegans OX=6239 GN=K02A2.6 PE=4 SV=1
TRINITY_DN28842_c0_g2_i1	0	0	0	0	0	1	0	0	1	0	0	0	0	0.65	0	0	0	0	0	0	0	0	0	2	0	0	2	0	0	0.35	0		YRD6	CAEELUncharacterized protein K02A2.6 OS=Caenorhabditis elegans OX=6239 GN=K02A2.6 PE=4 SV=1
TRINITY_DN91873_c0_g1_i1	0	0	0	0	0	0	0	0	0	0	0	0	0	0	4	0	0	0	0	1	0	0	0	0	0	0	0	0	0	0	0		YRD6	CAEELUncharacterized protein K02A2.6 OS=Caenorhabditis elegans OX=6239 GN=K02A2.6 PE=4 SV=1
TRINITY_DN50880_c0_g1_i1	0	3	0	0	0	0	9	0	0	0	0	0	7.57	0	0	0	0	0	0	0	0	0	0	0	0	0	0	0	0	0	5		YRD6	CAEELUncharacterized protein K02A2.6 OS=Caenorhabditis elegans OX=6239 GN=K02A2.6 PE=4 SV=1
TRINITY_DN22651_c0_g1_i14	0	1.52	4.48	0	0	0	0	0	0	0	0	1	6	0	0	0	2.11	4.04	0	0	0	0	1.53	0	0	0	0	0	0	3.42	2.02		YRD6	CAEELUncharacterized protein K02A2.6 OS=Caenorhabditis elegans OX=6239 GN=K02A2.6 PE=4 SV=1
TRINITY_DN207_c0_g1_i11	0	0	0	0	0	0	3.48	0	4.95	0	0	0	8.24	0	0	7.43	0	0	20.56	8.12	2.53	0	0	6.84	0	7.43	0	0	12.59	0	0		YRD6	CAEELUncharacterized protein K02A2.6 OS=Caenorhabditis elegans OX=6239 GN=K02A2.6 PE=4 SV=1
TRINITY_DN34542_c0_g1_i4	0	0	0	0	1.96	1	1	0	0	0	0	1.88	0	0	0	1.56	0	0	1.57	0	0	1.26	0	0	0	2	0	10.21	0	0	0		YRD6	CAEELUncharacterized protein K02A2.6 OS=Caenorhabditis elegans OX=6239 GN=K02A2.6 PE=4 SV=1
TRINITY_DN48044_c2_g1_i18	0	0	0	0	0	0	4	0	0	0	0	0	0	0	0	0	0	0	0	0	3	0	0	0	0	0	0	0	0	0	0		YRD6	CAEELUncharacterized protein K02A2.6 OS=Caenorhabditis elegans OX=6239 GN=K02A2.6 PE=4 SV=1
TRINITY_DN8116_c0_g1_i2	0.92	0	3	0	3	0.81	3	2.81	0.29	0	1.69	0	0	6.69	0	2.76	3.8	0	0	0.62	0	0	0	0	3.94	0	0	24.69	3.72	54.19	40.77		YRD6	CAEELUncharacterized protein K02A2.6 OS=Caenorhabditis elegans OX=6239 GN=K02A2.6 PE=4 SV=1
TRINITY_DN5574_c0_g1_i7	2	7.25	4.13	7.25	0	2.73	3	3.69	2.49	1.93	1.2	3	7.21	0	1	3.13	1.5	0	7.74	1.53	0	5.25	2.15	3.3	3.45	0	4.01	6.63	1.37	0	4.17		YRD6	CAEELUncharacterized protein K02A2.6 OS=Caenorhabditis elegans OX=6239 GN=K02A2.6 PE=4 SV=1
TRINITY_DN9574_c0_g1_i2	0	0	0	2	0	1	1	0	0	0	0	0	0	0	0	0	0	0	0	0	1	1	0	0	0	1	1	0	1	0	0		YRD6	CAEELUncharacterized protein K02A2.6 OS=Caenorhabditis elegans OX=6239 GN=K02A2.6 PE=4 SV=1
TRINITY_DN9174_c0_g1_i1	0	3	1	1	0	1	0	0	0	0	0	0	8.71	0	0	0	0	0	0	1	0	0	0	1.22	0	0	1.07	0	1	0	0		YRD6	CAEELUncharacterized protein K02A2.6 OS=Caenorhabditis elegans OX=6239 GN=K02A2.6 PE=4 SV=1
TRINITY_DN13347_c0_g1_i2	1.26	2	6.05	3	1	1.42	0	3.23	5	1	5.79	0	7.4	5.74	0	0	1	0	3	1	3	3	2.29	0	2	2	3.85	2	1.27	0	6.28		YRD6	CAEELUncharacterized protein K02A2.6 OS=Caenorhabditis elegans OX=6239 GN=K02A2.6 PE=4 SV=1
TRINITY_DN20527_c0_g1_i9	1	1	0	3.34	0	0	1	0	0	0	2	0	0	1.29	0	0	0	0	0	0	0	0	0	2	0	0	0	0	1	0	0		YRD6	CAEELUncharacterized protein K02A2.6 OS=Caenorhabditis elegans OX=6239 GN=K02A2.6 PE=4 SV=1
TRINITY_DN10651_c0_g1_i3	0	0	0	0	0	0	0	0	0	0	0	0	0	0	0	0	1.55	0	0	5.76	0	14.63	0	0	0	0	3.51	0	0	0	0		YRD6	CAEELUncharacterized protein K02A2.6 OS=Caenorhabditis elegans OX=6239 GN=K02A2.6 PE=4 SV=1
TRINITY_DN7080_c0_g1_i11	0	0	0	0	0	0	0	0	0	0	0	0	0	0	0	0	0	0	3.69	0	0	6.49	9	0	2.38	0	5.97	0	0	0	0		YRD6	CAEELUncharacterized protein K02A2.6 OS=Caenorhabditis elegans OX=6239 GN=K02A2.6 PE=4 SV=1
TRINITY_DN12320_c0_g1_i5	0	0	1.31	4	1	1	1	1	0	3	1	0	2	1	0	1	1	0	2	1	1	0	2	3	0	1	2	2	1	0	0		YRD6	CAEELUncharacterized protein K02A2.6 OS=Caenorhabditis elegans OX=6239 GN=K02A2.6 PE=4 SV=1
TRINITY_DN10610_c0_g1_i74	1	0	0	0	0	0	0	4.81	1	0	0	0	3.34	4.41	0	1.31	1	0	2.35	0	1.61	0	0	1	0	1	0	0	0	1	0		YRD6	CAEELUncharacterized protein K02A2.6 OS=Caenorhabditis elegans OX=6239 GN=K02A2.6 PE=4 SV=1
TRINITY_DN207_c0_g1_i28	0	0	14.07	0	0	37.65	0	0	0	0	0	0	0	0	0	0	0	0	0	0	0	0	0	0	0	0	0	0	12.91	0	0		YRD6	CAEELUncharacterized protein K02A2.6 OS=Caenorhabditis elegans OX=6239 GN=K02A2.6 PE=4 SV=1
TRINITY_DN41330_c0_g1_i1	0	0	0	0	0	0	0	0	0	0	0	0	0	0	21	0	0	0	0	0	0	0	0	0	0	0	0	0	0	0	0		YRD6	CAEELUncharacterized protein K02A2.6 OS=Caenorhabditis elegans OX=6239 GN=K02A2.6 PE=4 SV=1
TRINITY_DN3546_c0_g1_i8	109.22	117.49	180.53	138.26	140.79	183.39	25.18	487.63	560.55	64.58	94.44	134.13	686.93	211.17	42.26	2860.33	450.36	123.76	2362.51	1801.48	939.24	2029.46	635.3	1108.07	1386.55	2053.39	592.28	688.6	590.34	23.17	53.44		YRD6	CAEELUncharacterized protein K02A2.6 OS=Caenorhabditis elegans OX=6239 GN=K02A2.6 PE=4 SV=1
TRINITY_DN9174_c0_g1_i5	0	0	0	0	1	0	0	0	0	0	0	0	0	2	0	0	0	0	0	0	0	0	0	0	0	0	0	0	0	0	0		YRD6	CAEELUncharacterized protein K02A2.6 OS=Caenorhabditis elegans OX=6239 GN=K02A2.6 PE=4 SV=1
TRINITY_DN86732_c0_g1_i1	0	0	0	0	0	0	0	0	0	0	0	0	0	0	2	0	0	0	0	0	0	0	0	0	0	0	0	0	0	0	0		YRD6	CAEELUncharacterized protein K02A2.6 OS=Caenorhabditis elegans OX=6239 GN=K02A2.6 PE=4 SV=1
TRINITY_DN24020_c0_g1_i9	0	0	0	1	0	1	1	0	0	0	0	0	1	0	0	0	1	0	0	0	0	0	0	0.74	0.71	1.42	2	1	0	0	0		YRD6	CAEELUncharacterized protein K02A2.6 OS=Caenorhabditis elegans OX=6239 GN=K02A2.6 PE=4 SV=1
TRINITY_DN20527_c0_g1_i18	0	0	0	0	0	0	0	0	0	0	0	0	0	1	0	2	0	0	0	0	0	0	0	0	0	0	0	0	0	0	0		YRD6	CAEELUncharacterized protein K02A2.6 OS=Caenorhabditis elegans OX=6239 GN=K02A2.6 PE=4 SV=1
TRINITY_DN40552_c0_g2_i2	0	0.21	0	0	0.29	0	1.12	0	0	0.71	2.36	14.19	4.5	1.39	0	8.48	1.09	0.72	0.1	28.47	0	0	0	2.52	0	0	0	8.71	35.32	1.41	0		YRD6	CAEELUncharacterized protein K02A2.6 OS=Caenorhabditis elegans OX=6239 GN=K02A2.6 PE=4 SV=1
TRINITY_DN8116_c0_g1_i8	0	0	0	0	0	0	0	0	0	0	1	1	4	2	0	0	0	0	0	1.01	2	0	0	0	0	0	0	1	1	0	0		YRD6	CAEELUncharacterized protein K02A2.6 OS=Caenorhabditis elegans OX=6239 GN=K02A2.6 PE=4 SV=1
TRINITY_DN2266_c1_g1_i43	0	0	0	0	0	0	0	0	0	0	0	0	0	0	0	14.14	0	0	0	0	0	0	0	0	0	0	0	10.33	0	0	0		YRD6	CAEELUncharacterized protein K02A2.6 OS=Caenorhabditis elegans OX=6239 GN=K02A2.6 PE=4 SV=1
TRINITY_DN21135_c0_g1_i2	0	0	0	0	0	0	0	0	0	2	0	0	0	0	0	2.55	5	0	0	0	0	2	1.36	1.95	0	0	0	0	0	0	0		YRD6	CAEELUncharacterized protein K02A2.6 OS=Caenorhabditis elegans OX=6239 GN=K02A2.6 PE=4 SV=1
TRINITY_DN14737_c0_g1_i4	0	0	0	1	1	0	0	0	0	0	1	0	1.34	4.6	0	1	0	0	3	2.75	1.51	1	0	4.03	0	0	0	0	0	1	0		YRD6	CAEELUncharacterized protein K02A2.6 OS=Caenorhabditis elegans OX=6239 GN=K02A2.6 PE=4 SV=1
TRINITY_DN5574_c0_g1_i12	0	5.67	0	0	0	0	7	0	0	0	0	0	0	0	0	0	0	0	0	0	7.5	0	11.19	6.39	0	0	0	0	0	0	8.83		YRD6	CAEELUncharacterized protein K02A2.6 OS=Caenorhabditis elegans OX=6239 GN=K02A2.6 PE=4 SV=1
TRINITY_DN24020_c0_g1_i22	0	2	0	0	0	0	3.5	0	4	0	2	1	0	0	0	1	0	0	2.5	2	0	0	0	0	1.29	0	1.5	1.33	0	0	6		YRD6	CAEELUncharacterized protein K02A2.6 OS=Caenorhabditis elegans OX=6239 GN=K02A2.6 PE=4 SV=1
TRINITY_DN207_c0_g1_i15	2.53	0	0	13.54	5.14	6.19	0	0	11.6	3.44	0	0	15.95	35.47	1.6	6.27	0	0	0	3.94	0	1.72	0	25.57	5.52	4.05	0	0	15.73	0	0		YRD6	CAEELUncharacterized protein K02A2.6 OS=Caenorhabditis elegans OX=6239 GN=K02A2.6 PE=4 SV=1
TRINITY_DN28842_c0_g2_i4	0	3	0	0	1.06	0	0	0	0	0	2	0	3	0.9	0	0	0	0	0	0	0	0	3	0	0	2	0	0	2	1.65	0		YRD6	CAEELUncharacterized protein K02A2.6 OS=Caenorhabditis elegans OX=6239 GN=K02A2.6 PE=4 SV=1
TRINITY_DN8058_c0_g1_i5	0	0	0	0	0	0	0	0	0	0	0	0	0	0	0	0	0	0	0	0	0	0	0	0	0	0	0	0	0	0	0		YRD6	CAEELUncharacterized protein K02A2.6 OS=Caenorhabditis elegans OX=6239 GN=K02A2.6 PE=4 SV=1
TRINITY_DN306_c0_g1_i11	109	0	205.79	105.67	182.6	311.37	56.24	76.53	111.82	7.27	60.98	60.66	9.71	25.35	0	66.67	129.56	14.75	191.44	0	40.75	198.03	94.76	0	0	0	0	19.79	183.57	0	0		YRD6	CAEELUncharacterized protein K02A2.6 OS=Caenorhabditis elegans OX=6239 GN=K02A2.6 PE=4 SV=1
TRINITY_DN743_c1_g1_i16	0	0	45.44	0	171.47	0	0	99.82	0	0	0	0	782.23	0	0	981.08	30.76	41.44	1426.09	133.29	392.83	103.19	166.85	0	226.45	0	115.95	48.54	0	0	102.05		YRD6	CAEELUncharacterized protein K02A2.6 OS=Caenorhabditis elegans OX=6239 GN=K02A2.6 PE=4 SV=1
TRINITY_DN34362_c3_g1_i1	1	1	0	0	0	0	0	0	0	0	1	0	1	0	0	1	0	0	2	0	0	0	0	1	0	1	1	0	0	0	0		YRD6	CAEELUncharacterized protein K02A2.6 OS=Caenorhabditis elegans OX=6239 GN=K02A2.6 PE=4 SV=1
TRINITY_DN37772_c0_g1_i1	0	0	0	0	0	0	0	1	0	0	0	0	0	0	0	1	0	0	0	0	0	0.26	0	0	0	0	0	0	0	0	0		YRD6	CAEELUncharacterized protein K02A2.6 OS=Caenorhabditis elegans OX=6239 GN=K02A2.6 PE=4 SV=1
TRINITY_DN14788_c0_g1_i7	1	6	1	2	1	0	4	0	4	2	0	0	4	0	0	5	1	0	3	0	0	4.58	1	1.14	0	1.12	5.28	0	1	2	6		YRD6	CAEELUncharacterized protein K02A2.6 OS=Caenorhabditis elegans OX=6239 GN=K02A2.6 PE=4 SV=1
TRINITY_DN5574_c0_g1_i10	0	0.07	3.98	5.64	0	0	0	4.16	5.78	0	0	0	18.79	20.76	0	11.87	0	0	0	9.68	6.5	0	0	21.07	11.45	0	3.01	3.46	4.8	0	0		YRD6	CAEELUncharacterized protein K02A2.6 OS=Caenorhabditis elegans OX=6239 GN=K02A2.6 PE=4 SV=1
TRINITY_DN13072_c0_g1_i7	0	0	0	0	0	0	0	0	0	0	0	0	0	0	0	0	0	0	0	0	0	0	0	0	181	0	0	1.08	0	3	2		YRD6	CAEELUncharacterized protein K02A2.6 OS=Caenorhabditis elegans OX=6239 GN=K02A2.6 PE=4 SV=1
TRINITY_DN132552_c0_g1_i1	0	0	0	0	0	0	0	0	0	0	0	0	0	0	1	0	0	0	0	0	0	0	0	0	0	0	0	0	0	0	0		YRD6	CAEELUncharacterized protein K02A2.6 OS=Caenorhabditis elegans OX=6239 GN=K02A2.6 PE=4 SV=1
TRINITY_DN14788_c0_g1_i3	0	0	0	0	0	0	0	0	0	1	0	0	0	0	0	0	0	0	0	2	0	0	0	0	0	0	4.72	0	0	0	0		YRD6	CAEELUncharacterized protein K02A2.6 OS=Caenorhabditis elegans OX=6239 GN=K02A2.6 PE=4 SV=1
TRINITY_DN20434_c0_g1_i2	0	0	0	1	0	0	0	0	1	1.99	0	0	1	0	0	0	0	0	0	0	0	0	0	0	0	1	1	0	1	0	0		YRD6	CAEELUncharacterized protein K02A2.6 OS=Caenorhabditis elegans OX=6239 GN=K02A2.6 PE=4 SV=1
TRINITY_DN130887_c0_g1_i1	0	0	0	0	0	0	0	0	0	0	0	0	0	0	0	0	0	0	0	0	0	0	0	0	0	0	0	0	0	0	0		YRD6	CAEELUncharacterized protein K02A2.6 OS=Caenorhabditis elegans OX=6239 GN=K02A2.6 PE=4 SV=1
TRINITY_DN20269_c0_g3_i1	0	1	0	0	1	0	2	0	2	0	0	0	1	0	0	2	1	0	1	2	1	0	2	1	0	0	0	0	1	2	0		YRD6	CAEELUncharacterized protein K02A2.6 OS=Caenorhabditis elegans OX=6239 GN=K02A2.6 PE=4 SV=1
TRINITY_DN20527_c0_g1_i6	0	0	0	1.3	0	1	0	0	0	0	0	1	1	0	0	0	0	0	0	0	0	0	0	3	1	0	0	0	0	0	0		YRD6	CAEELUncharacterized protein K02A2.6 OS=Caenorhabditis elegans OX=6239 GN=K02A2.6 PE=4 SV=1
TRINITY_DN98550_c0_g1_i1	0	0	0	0	0	0	0	0	0	0	0	0	0	0	4	0	0	0	0	0	0	0	0	0	0	0	0	0	0	0	0		YRD6	CAEELUncharacterized protein K02A2.6 OS=Caenorhabditis elegans OX=6239 GN=K02A2.6 PE=4 SV=1
TRINITY_DN103975_c0_g1_i1	0	0	0	0	0	0	0	0	0	1	0	0	0	0	0	0	0	0	0	0	0	0	0	0	0	0	0	0	0	0	0		YRD6	CAEELUncharacterized protein K02A2.6 OS=Caenorhabditis elegans OX=6239 GN=K02A2.6 PE=4 SV=1
TRINITY_DN1075_c0_g1_i12	0	19.45	2.24	0	63.6	0	0	3.4	0	11.14	0	0	0.21	2.52	0	0	0	0	0	0	2.16	0	0	0	36.07	0	0	29.33	0	0	0		YRD6	CAEELUncharacterized protein K02A2.6 OS=Caenorhabditis elegans OX=6239 GN=K02A2.6 PE=4 SV=1
TRINITY_DN114948_c0_g1_i1	0	0	0	0	0	0	0	0	0	0	0	0	0	0	3	0	0	0	0	0	0	0	0	0	0	0	0	0	0	0	0		YRD6	CAEELUncharacterized protein K02A2.6 OS=Caenorhabditis elegans OX=6239 GN=K02A2.6 PE=4 SV=1
TRINITY_DN207_c0_g1_i18	0	0	0	0	0	0	0	0	10.24	6.08	0	11.9	0	0	9.57	0	0	0	0	0	0	0	66.19	15.41	28.81	0	0	0	0	0	0		YRD6	CAEELUncharacterized protein K02A2.6 OS=Caenorhabditis elegans OX=6239 GN=K02A2.6 PE=4 SV=1
TRINITY_DN16993_c0_g1_i3	0	0	12.74	4.81	3.81	0	0	0	0	0	0	0	2.54	0	0	0	0	0	0	0	1.49	4.38	0	0	4.38	0	0	0	0	0	17.95		YRD6	CAEELUncharacterized protein K02A2.6 OS=Caenorhabditis elegans OX=6239 GN=K02A2.6 PE=4 SV=1
TRINITY_DN28842_c0_g2_i7	0	0	0	1	0	0	4	0	0	3	0	0	0	0	0	0	0	0	2	0	0	0	0	4.48	0	0	2	0	0	0	0		YRD6	CAEELUncharacterized protein K02A2.6 OS=Caenorhabditis elegans OX=6239 GN=K02A2.6 PE=4 SV=1
TRINITY_DN6114_c2_g1_i2	0	0	0	0	0	0	0	0	0	0	0	0	0	0	0	0	0	0	0	0	0	0	0	0	0	0	0	0	0	0	0		YRD6	CAEELUncharacterized protein K02A2.6 OS=Caenorhabditis elegans OX=6239 GN=K02A2.6 PE=4 SV=1
TRINITY_DN5514_c0_g1_i21	0	0	0	0	0	0	0	0	0	0	0	4	8.18	29.53	0	0	0	0	0	0	0	7	14.72	0	0	0	0	0	0	1	0		YRD6	CAEELUncharacterized protein K02A2.6 OS=Caenorhabditis elegans OX=6239 GN=K02A2.6 PE=4 SV=1
TRINITY_DN5514_c0_g1_i26	0	1	2	1	0	1	0	0	0	0	0	0	7.82	4.47	0	0	2	0	0	0	7	0	3.28	1	2	0	0	0	0	0	2		YRD6	CAEELUncharacterized protein K02A2.6 OS=Caenorhabditis elegans OX=6239 GN=K02A2.6 PE=4 SV=1
TRINITY_DN14788_c0_g1_i12	2	0	2	0	0	0	1	1	0	0	0	0	1	1	0	0	0.38	0	1	0	0	0	0	0	0	0	11.81	0	0	0	0		YRD6	CAEELUncharacterized protein K02A2.6 OS=Caenorhabditis elegans OX=6239 GN=K02A2.6 PE=4 SV=1
TRINITY_DN8116_c0_g1_i5	0	3.37	0	0	0	0	0	0	0	0	0	0	0	0	0	0	0	0	0	0	0	0	0	0	0	0	0	0	0	0	6.1		YRD6	CAEELUncharacterized protein K02A2.6 OS=Caenorhabditis elegans OX=6239 GN=K02A2.6 PE=4 SV=1
TRINITY_DN12848_c0_g1_i48	1	1	0	3	0	0	0	0	1	4.83	2	1	5.29	0	0	2.7	0	0	5	0	0	0	1	0	0	0	0	1.2	2.43	0	0		YRD6	CAEELUncharacterized protein K02A2.6 OS=Caenorhabditis elegans OX=6239 GN=K02A2.6 PE=4 SV=1
TRINITY_DN47087_c0_g1_i1	0	0	0	0	0	0	0	0	0	0	0	0	0	0	7	0	0	0	0	0	0	0	0	0	0	0	0	0	0	0	0		YRD6	CAEELUncharacterized protein K02A2.6 OS=Caenorhabditis elegans OX=6239 GN=K02A2.6 PE=4 SV=1
TRINITY_DN207_c0_g1_i25	76.85	46.48	93.93	114.56	37.19	23.77	15.63	20.69	1.18	25.8	28.4	0	25.9	36.6	0	0	0	0	6.73	30.74	24.91	4.32	29.99	27.47	35.34	8.67	101.08	116.8	44.54	3.84	9.4		YRD6	CAEELUncharacterized protein K02A2.6 OS=Caenorhabditis elegans OX=6239 GN=K02A2.6 PE=4 SV=1
TRINITY_DN122395_c0_g1_i1	0	0	0	0	0	0	0	0	0	0	0	0	0	0	3	0	0	0	0	0	0	0	0	0	0	0	0	0	0	0	0		YRD6	CAEELUncharacterized protein K02A2.6 OS=Caenorhabditis elegans OX=6239 GN=K02A2.6 PE=4 SV=1
TRINITY_DN14737_c0_g1_i3	0	1	3	0	0	0	1	0	0	0	0	2	2.66	8.4	0	0	0	0	0	5.25	1.49	1	5	1.97	0	8	0	3	0	0	0		YRD6	CAEELUncharacterized protein K02A2.6 OS=Caenorhabditis elegans OX=6239 GN=K02A2.6 PE=4 SV=1
TRINITY_DN12026_c0_g2_i1	0	0	0	1	0	0	1.22	1	0	0	0	3.18	1	1.39	0	0	0	0	0	0	0	2	0	2	0	1.07	2	1.42	0	0	1		YRD6	CAEELUncharacterized protein K02A2.6 OS=Caenorhabditis elegans OX=6239 GN=K02A2.6 PE=4 SV=1
TRINITY_DN1075_c0_g1_i10	222.13	59.48	0	419.84	81.14	137	23.43	39.14	1.49	0	25.96	167.06	1	0	11	54.72	6.5	0	247.19	0	29.56	0	375.04	167.15	267.07	448.45	341.57	222.92	0	12	36		YRD6	CAEELUncharacterized protein K02A2.6 OS=Caenorhabditis elegans OX=6239 GN=K02A2.6 PE=4 SV=1
TRINITY_DN105058_c0_g1_i1	0	0	0	0	0	0	0	0	0	0	0	0	0	0	25	0	0	0	0	0	0	0	0	0	0	0	0	0	0	0	0		YRD6	CAEELUncharacterized protein K02A2.6 OS=Caenorhabditis elegans OX=6239 GN=K02A2.6 PE=4 SV=1
TRINITY_DN22651_c0_g1_i10	0	1.48	0	1	0	0	1	1	1	0	0	0	0	0	0	1	0	0	3	0	1	0	0.47	1	0	0	0	2	0	0	0		YRD6	CAEELUncharacterized protein K02A2.6 OS=Caenorhabditis elegans OX=6239 GN=K02A2.6 PE=4 SV=1
TRINITY_DN8346_c0_g1_i4	0	0	2	0	0	0	2	0	0	1	0	0	2.99	3.75	0	1	1	0	0	1	1	0	0	3	0	0	0	0	0	1	0		YRD6	CAEELUncharacterized protein K02A2.6 OS=Caenorhabditis elegans OX=6239 GN=K02A2.6 PE=4 SV=1
TRINITY_DN15623_c0_g1_i21	0	0	0	0	6.65	2.1	0	0	0	0	0	0	22.9	0	0	0	0	0	0	0	0	0	0	0	0	0	0	0	5.53	0	0		YRD6	CAEELUncharacterized protein K02A2.6 OS=Caenorhabditis elegans OX=6239 GN=K02A2.6 PE=4 SV=1
TRINITY_DN34362_c0_g1_i13	0	3	0	0	0	0	0	0	0	0	0	0	4	1	0	0	1	0	0	2	1	1	0	2	1	1	0	0	0	0	0		YRD6	CAEELUncharacterized protein K02A2.6 OS=Caenorhabditis elegans OX=6239 GN=K02A2.6 PE=4 SV=1
TRINITY_DN37894_c0_g1_i1	0	0	0	0	0	0	0	0	0	0	0	0	0	0	0	1	0	0	3	3	0	0	2	0	0	0	0	0	0	0	0		YRD6	CAEELUncharacterized protein K02A2.6 OS=Caenorhabditis elegans OX=6239 GN=K02A2.6 PE=4 SV=1
TRINITY_DN29124_c0_g1_i13	0	0	0	4	0	0	0	1	0	0	0	2	4.42	0	0	0	0	0	0	0	3	0	0	0	0	0	0	0	0	0	0		YRD6	CAEELUncharacterized protein K02A2.6 OS=Caenorhabditis elegans OX=6239 GN=K02A2.6 PE=4 SV=1
TRINITY_DN136346_c0_g1_i1	0	0	0	0	0	0	0	0	0	0	0	0	0	0	4	0	0	0	0	0	0	0	0	0	0	0	0	0	0	0	0		YRD6	CAEELUncharacterized protein K02A2.6 OS=Caenorhabditis elegans OX=6239 GN=K02A2.6 PE=4 SV=1
TRINITY_DN21135_c0_g1_i1	0	0	0	0	0	0	1	2	0	0	0	0	0	0	1	1.45	0	0	2	1	0	0	1.64	1	0	2	0	3	0	0	0		YRD6	CAEELUncharacterized protein K02A2.6 OS=Caenorhabditis elegans OX=6239 GN=K02A2.6 PE=4 SV=1
TRINITY_DN2266_c1_g1_i12	0	9.65	0	0	4.77	14.64	10.25	9.35	4.85	1.47	5.55	9.32	4.78	17.64	0	0	7.26	1.61	92.64	10.85	0	5.06	13.71	8.43	5.25	17.63	10.17	0	5.03	5.09	0		YRD6	CAEELUncharacterized protein K02A2.6 OS=Caenorhabditis elegans OX=6239 GN=K02A2.6 PE=4 SV=1
TRINITY_DN17170_c0_g1_i14	0	0	0	1	0	1	0	0	0	1	1.99	0	1.95	0	0	4	0	0	3.37	1	0	0	0	2.4	0	0	2	1	1.78	0	0		YRD6	CAEELUncharacterized protein K02A2.6 OS=Caenorhabditis elegans OX=6239 GN=K02A2.6 PE=4 SV=1
TRINITY_DN13347_c0_g2_i2	1.74	2	0.67	0	0	0	0	1.17	0	0	0	0	1.6	2.68	0	1	0	0	1	0	1	0	0	2	0	0	1.79	0	1.73	0	0		YRD6	CAEELUncharacterized protein K02A2.6 OS=Caenorhabditis elegans OX=6239 GN=K02A2.6 PE=4 SV=1
TRINITY_DN37772_c0_g1_i2	0	0	0	0	1	0	0	0	1	0	0	0	0	0	0	0	0	0	0	0	0	1.74	0	2	0	0	0	0	0	0	0		YRD6	CAEELUncharacterized protein K02A2.6 OS=Caenorhabditis elegans OX=6239 GN=K02A2.6 PE=4 SV=1
TRINITY_DN7174_c0_g2_i4	0	0	0	0	0	1	0	0	0	0	0	0	0	0	0	2.48	0	0	2	1	0	1	0	0	1	0	0	2	0	0	0		YRD6	CAEELUncharacterized protein K02A2.6 OS=Caenorhabditis elegans OX=6239 GN=K02A2.6 PE=4 SV=1
TRINITY_DN13065_c0_g2_i3	0	3.4	0	4.24	0	0	7.43	0	3.76	0	0	1.91	1.64	6	1	0	0	0	4.28	0	12.8	6.89	0	0	0	0	2.23	3.33	0	0	0		YRD6	CAEELUncharacterized protein K02A2.6 OS=Caenorhabditis elegans OX=6239 GN=K02A2.6 PE=4 SV=1
TRINITY_DN51930_c0_g1_i1	0	0	1	0	0	0	0	0	1	0	0	0	0	0	0	0	1	1	0	0	0	0	0	0	0	0	0	0	0	0	0		YRD6	CAEELUncharacterized protein K02A2.6 OS=Caenorhabditis elegans OX=6239 GN=K02A2.6 PE=4 SV=1
TRINITY_DN102452_c0_g1_i1	0	0	0	0	0	0	0	0	0	0	0	0	0	0	2	0	0	0	0	0	0	0	0	0	0	0	0	0	0	0	0		YRD6	CAEELUncharacterized protein K02A2.6 OS=Caenorhabditis elegans OX=6239 GN=K02A2.6 PE=4 SV=1
TRINITY_DN24020_c0_g1_i15	2	0	3	0	3	2	3.5	2	0	0	0	0	2	2	0	0	0	0	2.5	0	0	0	6	1.26	0	2.58	1.5	0	0	4	0		YRD6	CAEELUncharacterized protein K02A2.6 OS=Caenorhabditis elegans OX=6239 GN=K02A2.6 PE=4 SV=1
TRINITY_DN20434_c0_g1_i1	0	0	0	0	0	0	0	0	0	0	0	0	0	0	0	0	0	0	0	0	0	0	1	0	1	0	1	0	0	0	0		YRD6	CAEELUncharacterized protein K02A2.6 OS=Caenorhabditis elegans OX=6239 GN=K02A2.6 PE=4 SV=1
TRINITY_DN28626_c1_g2_i17	2	0	0	0	0	3	0	1	5.14	0	6	1.2	2.47	0	0	6	0	0	6.78	1	1	0	2	1.91	0	0	0	0.46	1	2	1.91		YRD6	CAEELUncharacterized protein K02A2.6 OS=Caenorhabditis elegans OX=6239 GN=K02A2.6 PE=4 SV=1
TRINITY_DN87843_c0_g1_i1	0	0	0	0	0	0	0	0	0	0	0	0	0	1	0	1	0	0	0	0	0	0	0	0	0	0	0	0	0	0	0		YRBG	ECOLIInner membrane protein YrbG OS=Escherichia coli (strain K12) OX=83333 GN=yrbG PE=1 SV=1
TRINITY_DN89449_c0_g1_i1	2	1	0	6	6	3	27	6	4	0	0	4	0	3	0	1	5	0	12	3	3	5	6	1	2	6	0	1	2	0	0		YRBF	BACSUSec translocon accessory complex subunit YrbF OS=Bacillus subtilis (strain 168) OX=224308 GN=yrbF PE=3 SV=1
TRINITY_DN574_c1_g1_i22	0	15.22	5.95	8.3	5.96	15.3	0	0	20.65	3.38	8.62	25.54	26.58	0	0	54.4	0	0	19.8	0	34.72	3.34	2.86	29.98	7.3	27.07	33.22	37.73	15.85	19.56	13.43		YR831	MIMIVPutative serine/threonine-protein kinase/receptor R831 OS=Acanthamoeba polyphaga mimivirus OX=212035 GN=MIMI	R831 PE=3 SV=2
TRINITY_DN574_c1_g1_i18	43.83	15.84	42.74	21.1	60.73	37.34	31.3	21.91	34.84	34.48	37.56	14.79	84.89	51.22	1.82	19.52	12.33	4.95	49.77	48.63	33.27	3.72	75.86	26.43	28.2	48.82	15.69	32.52	37.88	29.36	31.32		YR831	MIMIVPutative serine/threonine-protein kinase/receptor R831 OS=Acanthamoeba polyphaga mimivirus OX=212035 GN=MIMI	R831 PE=3 SV=2
TRINITY_DN76227_c0_g1_i1	0	0	0	0	0	0	0	0	0	0	0	0	0	0	8	0	0	0	0	0	0	0	0	0	0	0	0	0	0	0	0		YR831	MIMIVPutative serine/threonine-protein kinase/receptor R831 OS=Acanthamoeba polyphaga mimivirus OX=212035 GN=MIMI	R831 PE=3 SV=2
TRINITY_DN5344_c0_g1_i1	0	0	1	0	0	0	0	0	1	0.66	0	2	4	0	0	1	0.35	0	1.43	2	0	0.88	0.58	4.88	0.34	1	0	0	0	0.35	0		YR831	MIMIVPutative serine/threonine-protein kinase/receptor R831 OS=Acanthamoeba polyphaga mimivirus OX=212035 GN=MIMI	R831 PE=3 SV=2
TRINITY_DN69318_c0_g1_i1	0	0	0	0	0	0	0	0	0	1	0	0	0	0	0	0	0	0	0	0	0	0	0	0	0	1	0	0	0	0	0		YR826	MIMIVPutative serine/threonine-protein kinase/receptor R826 OS=Acanthamoeba polyphaga mimivirus OX=212035 GN=MIMI	R826 PE=3 SV=2
TRINITY_DN3573_c0_g2_i11	2.45	2	2	7	3.16	1.1	6	5.84	1.85	0	0.54	0.72	2.56	6.41	0	4	2.99	1.04	4.55	3.57	0	1.14	1.84	7.79	1.19	4.69	5.67	4.43	0	6.02	4.05		YR826	MIMIVPutative serine/threonine-protein kinase/receptor R826 OS=Acanthamoeba polyphaga mimivirus OX=212035 GN=MIMI	R826 PE=3 SV=2
TRINITY_DN9769_c0_g1_i1	30	19.31	20.64	8.99	20.8	39.41	14	8.9	29.2	16.2	8.98	17	53	45.03	5	34.27	34	6	27	35.92	25	49	34	39.95	30	52	33.14	34	17	3	5		YR826	MIMIVPutative serine/threonine-protein kinase/receptor R826 OS=Acanthamoeba polyphaga mimivirus OX=212035 GN=MIMI	R826 PE=3 SV=2
TRINITY_DN95110_c0_g1_i1	0	0	0	0	0	0	0	0	0	0	0	0	0	0	2	0	0	0	0	0	0	0	0	0	0	0	0	0	0	0	0		YR826	MIMIVPutative serine/threonine-protein kinase/receptor R826 OS=Acanthamoeba polyphaga mimivirus OX=212035 GN=MIMI	R826 PE=3 SV=2
TRINITY_DN13325_c0_g2_i1	0	0	0	0	0	1	0	2	0	0	0	0	0	0	0	0	1	2	0	0	0	0	0	0	1	0	1	0	0	0	0		YR826	MIMIVPutative serine/threonine-protein kinase/receptor R826 OS=Acanthamoeba polyphaga mimivirus OX=212035 GN=MIMI	R826 PE=3 SV=2
TRINITY_DN9769_c0_g1_i2	0	0	4.36	11.8	0	3.59	0	6.39	0	0	5.02	0	0	3.77	0	4.05	0	0	0	0	0	0	0	0	0	0	0	0	0	0	0		YR826	MIMIVPutative serine/threonine-protein kinase/receptor R826 OS=Acanthamoeba polyphaga mimivirus OX=212035 GN=MIMI	R826 PE=3 SV=2
TRINITY_DN3573_c0_g2_i5	0	2	1	0	0	0	0	1.99	0	0	1	0	3.44	0	0	0	3.01	1	0	1	1	0	1	2.03	1.79	2.01	0	4.76	1	0	1.99		YR826	MIMIVPutative serine/threonine-protein kinase/receptor R826 OS=Acanthamoeba polyphaga mimivirus OX=212035 GN=MIMI	R826 PE=3 SV=2
TRINITY_DN9769_c0_g1_i3	0	2.69	0	4.21	3.2	0	0	4.71	3.8	5.8	0	0	0	4.19	0	2.67	0	0	0	4.08	0	0	0	10.05	0	0	1.86	0	0	0	0		YR826	MIMIVPutative serine/threonine-protein kinase/receptor R826 OS=Acanthamoeba polyphaga mimivirus OX=212035 GN=MIMI	R826 PE=3 SV=2
TRINITY_DN140589_c0_g1_i1	0	0	0	0	0	0	0	0	0	0	0	0	0	0	4	0	0	0	0	0	0	0	0	0	0	0	0	0	0	0	0		YR826	MIMIVPutative serine/threonine-protein kinase/receptor R826 OS=Acanthamoeba polyphaga mimivirus OX=212035 GN=MIMI	R826 PE=3 SV=2
TRINITY_DN13325_c0_g4_i1	0	0	0	0	0	0	0	0	0	0	0	0	1	0	0	0	0	0	0	0	0	1	1	0	0	0	0	0	0	0	0		YR826	MIMIVPutative serine/threonine-protein kinase/receptor R826 OS=Acanthamoeba polyphaga mimivirus OX=212035 GN=MIMI	R826 PE=3 SV=2
TRINITY_DN21542_c3_g1_i1	0	0	1	1	0	0	0	0	0	2	1	0	0	0	0	1	0	0	2	0	0	0	0	4	0	0	0	0	1	0	0		YR826	MIMIVPutative serine/threonine-protein kinase/receptor R826 OS=Acanthamoeba polyphaga mimivirus OX=212035 GN=MIMI	R826 PE=3 SV=2
TRINITY_DN23821_c0_g1_i9	0	0	0	0	1	0	0	0	0	1	1	0	1	2.13	0	0	2	0	0	0	0	2.59	0	0	3	3.83	0	1.93	0	0	0		YR818	MIMIVPutative serine/threonine-protein kinase/receptor R818 OS=Acanthamoeba polyphaga mimivirus OX=212035 GN=MIMI	R818 PE=3 SV=1
TRINITY_DN23821_c0_g1_i6	0	2.63	5.85	2.09	0	0	1	0.94	0	0	1.32	0	3.05	6.83	0	0	0	0	0	1	1	2.43	1.37	5.56	3	2	1.05	0	2.01	3.95	1		YR818	MIMIVPutative serine/threonine-protein kinase/receptor R818 OS=Acanthamoeba polyphaga mimivirus OX=212035 GN=MIMI	R818 PE=3 SV=1
TRINITY_DN22104_c0_g1_i1	0	0	2	0	0	0	2	2	1	0	0	0	0	0.98	0	0	0	0	1	0	0	0	0	1	0	1	1	1.33	0	0	0		YR818	MIMIVPutative serine/threonine-protein kinase/receptor R818 OS=Acanthamoeba polyphaga mimivirus OX=212035 GN=MIMI	R818 PE=3 SV=1
TRINITY_DN26842_c0_g1_i1	2	0	0	1	1	0	0	0	3	1	0	0	2	0	0	1	0	0	1	0	0	1	1.29	1	0	1.89	0	2.45	0	0	0		YR818	MIMIVPutative serine/threonine-protein kinase/receptor R818 OS=Acanthamoeba polyphaga mimivirus OX=212035 GN=MIMI	R818 PE=3 SV=1
TRINITY_DN66104_c0_g1_i1	0	0	0	0	0	0	0	0	0	0	0	0	0	0	0	0	2	0	0	0	0	9	0	0	0	0	0	0	0	0	0		YR818	MIMIVPutative serine/threonine-protein kinase/receptor R818 OS=Acanthamoeba polyphaga mimivirus OX=212035 GN=MIMI	R818 PE=3 SV=1
TRINITY_DN99229_c0_g1_i1	1	0	1	0	0	0	0	1	0	0	4	0	0	0	0	0	0	0	0	0	1	0	0	0	1	0	0	0	0	0	0		YR5A	AGRFCUncharacterized protein Atu2659.1 OS=Agrobacterium fabrum (strain C58 / ATCC 33970) OX=176299 GN=Atu2659.1 PE=3 SV=1
TRINITY_DN81721_c0_g1_i1	0	0	0	0	0	0	0	0	0	0	0	0	2	0	0	0	0	0	0	0	0	0	0	0	0	0	0	0	0	0	0		YR555	MIMIVUncharacterized protein R555 OS=Acanthamoeba polyphaga mimivirus OX=212035 GN=MIMI	R555 PE=4 SV=1
TRINITY_DN3342_c0_g1_i10	2.68	7.64	0	12.75	16.83	0	13.09	0	0	0	5.5	28.65	34.73	0	0	11.64	0	0	0	27.57	0	11.45	16.67	44.49	5.94	0	0	0	0	0	15.35		YR354	MIMIVUncharacterized protein R354 OS=Acanthamoeba polyphaga mimivirus OX=212035 GN=MIMI	R354 PE=1 SV=1
TRINITY_DN3342_c0_g1_i9	0	8	3.43	3.6	7.64	2.87	2.9	5.8	1.39	0	7.32	8.95	28.23	8.26	0	0	0	0	0	7.06	7.07	6.55	9.38	0.93	0	6.18	15.36	6.2	0	0	3.95		YR354	MIMIVUncharacterized protein R354 OS=Acanthamoeba polyphaga mimivirus OX=212035 GN=MIMI	R354 PE=1 SV=1
TRINITY_DN3342_c0_g1_i7	2	3.56	0	3.33	0	0	0	0	0	1.78	8.18	0	44.42	26.03	0	0	0	2.55	1.41	0	13.64	0	0	2.86	0	2.01	10.04	0	9.42	0	0		YR354	MIMIVUncharacterized protein R354 OS=Acanthamoeba polyphaga mimivirus OX=212035 GN=MIMI	R354 PE=1 SV=1
TRINITY_DN77592_c0_g1_i1	0	0	0	0	0	0	0	0	0	0	0	0	0	0	10	0	0	0	0	0	0	0	0	0	0	0	0	0	0	0	0		YR290	MIMIVPutative ATP-dependent RNA helicase R290 OS=Acanthamoeba polyphaga mimivirus OX=212035 GN=MIMI	R290 PE=3 SV=1
TRINITY_DN1360_c3_g1_i3	0	0	0	0	0	0	0	4.02	7	0	0	0	3	1	0	0	0	0	0	3	0	0	0	0	0	3.94	3.72	13	0	0	0		YR290	MIMIVPutative ATP-dependent RNA helicase R290 OS=Acanthamoeba polyphaga mimivirus OX=212035 GN=MIMI	R290 PE=3 SV=1
TRINITY_DN1360_c3_g1_i4	1	1	0	0	0	0	0	0.98	0	0	0	0	0	0	0	0	0	0	4	0	0	0	0	0	2	7.06	4.28	0	2	0	0		YR290	MIMIVPutative ATP-dependent RNA helicase R290 OS=Acanthamoeba polyphaga mimivirus OX=212035 GN=MIMI	R290 PE=3 SV=1
TRINITY_DN1360_c3_g1_i2	0	0	0	0	0	0	0	0	0	0	0	0	0	0	0	0	0	0	0	0	0	0	0	0	0	0	0	0	0	0	0		YR290	MIMIVPutative ATP-dependent RNA helicase R290 OS=Acanthamoeba polyphaga mimivirus OX=212035 GN=MIMI	R290 PE=3 SV=1
TRINITY_DN1360_c3_g1_i1	0	0	0	0	0	0	0	0	0	0	0	0	0	0	0	0	0	0	0	0	0	1	6	0	0	0	0	0	0	0	0		YR290	MIMIVPutative ATP-dependent RNA helicase R290 OS=Acanthamoeba polyphaga mimivirus OX=212035 GN=MIMI	R290 PE=3 SV=1
TRINITY_DN122632_c0_g1_i1	4	3	1	0	2	2	1	1	5	0	2	1	3	1	0	2	4	1	1	1	1	3	3	2	1	4	6	2	0	1	7		YR261	MIMIVUncharacterized protein R261 OS=Acanthamoeba polyphaga mimivirus OX=212035 GN=MIMI	R261 PE=4 SV=1
TRINITY_DN80956_c0_g1_i1	0	0	0	0	0	0	0	0	0	0	0	0	0	0	3	0	0	0	0	0	0	0	0	0	0	0	0	0	0	0	0		YR261	MIMIVUncharacterized protein R261 OS=Acanthamoeba polyphaga mimivirus OX=212035 GN=MIMI	R261 PE=4 SV=1
TRINITY_DN10408_c0_g1_i2	0	0	0	0	0	0	0	0	0	0	2	0	0	0	0	0	0	0	0	0	0	3	0	0	0	0	4	0	0	2	12		YR260	MIMIVDnaJ-like protein R260 OS=Acanthamoeba polyphaga mimivirus OX=212035 GN=MIMI	R260 PE=3 SV=1
TRINITY_DN10408_c0_g1_i3	0	0	0	0	0	1.33	2	0	0	0	0	0	0	0	0	1	0	0	0	0	0	0	4	0	0	2	0	0	0	0	0		YR260	MIMIVDnaJ-like protein R260 OS=Acanthamoeba polyphaga mimivirus OX=212035 GN=MIMI	R260 PE=3 SV=1
TRINITY_DN21530_c0_g1_i14	0	0	0	0	0	0	0	0	0	0	0	0	0	0	0	0	0	0	0	0	0	0	0	0	0	0	0	0	0	0	0		YR096	MIMIVPutative ankyrin repeat protein R96 OS=Acanthamoeba polyphaga mimivirus OX=212035 GN=MIMI	R96 PE=4 SV=1
TRINITY_DN27583_c0_g1_i9	0	0	0	0	0	0	0	0	0	0	0	0	0	0	23.38	0	0	0	0	0	0	0	0	0	0	1	0	0	0	0	0		YR096	MIMIVPutative ankyrin repeat protein R96 OS=Acanthamoeba polyphaga mimivirus OX=212035 GN=MIMI	R96 PE=4 SV=1
TRINITY_DN5681_c0_g1_i1	22	14	37	25	27	30	35	37	38	15	41	21	7	69	1	57	31	5	29	53	32	3	28	68	25	31	51	46	33	4	14		YQY2	CAEELUncharacterized protein F36G3.2 OS=Caenorhabditis elegans OX=6239 GN=F36G3.2 PE=4 SV=1
TRINITY_DN20794_c0_g1_i1	0	0	0	0	0	0	0	0	0	0	0	0	0	0	2	0	0	0	0	0	0	0	0	0	0	0	0	0	0	0	0		YQMA	SCHPOAnkyrin repeat-containing protein P1E11.10 OS=Schizosaccharomyces pombe (strain 972 / ATCC 24843) OX=284812 GN=SPCP1E11.10 PE=4 SV=1
TRINITY_DN27689_c0_g1_i36	7.06	6.25	8.42	7.08	10.02	2.07	3.55	3.29	6.95	5.92	13.1	2.01	0.56	15.18	0	1.55	0	2	0	1.82	5.25	1.92	5.06	0	0	14.45	25.84	4.16	0	3	2.99		YQMA	SCHPOAnkyrin repeat-containing protein P1E11.10 OS=Schizosaccharomyces pombe (strain 972 / ATCC 24843) OX=284812 GN=SPCP1E11.10 PE=4 SV=1
TRINITY_DN30336_c0_g1_i26	0	0	0	0	0	0	3.93	0	0.93	0	0	0	1.34	1.89	0	0	0	0	3.21	0	1.4	1	0	0	0	7.01	0	0	0	0	2.48		YQMA	SCHPOAnkyrin repeat-containing protein P1E11.10 OS=Schizosaccharomyces pombe (strain 972 / ATCC 24843) OX=284812 GN=SPCP1E11.10 PE=4 SV=1
TRINITY_DN17677_c0_g1_i4	0	0.69	0	1	1.19	0	0	3.11	0	0	0	0.99	2.67	0	1	1.71	0	0	0	0	0	0	0	0	0	0	1.93	2	2.56	0	0		YQMA	SCHPOAnkyrin repeat-containing protein P1E11.10 OS=Schizosaccharomyces pombe (strain 972 / ATCC 24843) OX=284812 GN=SPCP1E11.10 PE=4 SV=1
TRINITY_DN40497_c0_g1_i1	0	0	0	0	0	0	0	0	0	0	0	0	0	0	27	0	0	0	0	0	0	0	0	0	0	0	0	0	0	0	0		YQMA	SCHPOAnkyrin repeat-containing protein P1E11.10 OS=Schizosaccharomyces pombe (strain 972 / ATCC 24843) OX=284812 GN=SPCP1E11.10 PE=4 SV=1
TRINITY_DN73819_c0_g1_i1	0	0	0	0	0	0	0	0	0	0	0	0	0	0	1	0	0	0	0	0	0	0	0	0	0	0	0	0	0	0	0		YQMA	SCHPOAnkyrin repeat-containing protein P1E11.10 OS=Schizosaccharomyces pombe (strain 972 / ATCC 24843) OX=284812 GN=SPCP1E11.10 PE=4 SV=1
TRINITY_DN20794_c0_g1_i2	0	0	0	0	0	0	0	0	0	0	0	0	0	0	2.33	0	0	0	0	0	0	0	0	0	0	0	0	0	0	0	0		YQMA	SCHPOAnkyrin repeat-containing protein P1E11.10 OS=Schizosaccharomyces pombe (strain 972 / ATCC 24843) OX=284812 GN=SPCP1E11.10 PE=4 SV=1
TRINITY_DN135777_c0_g1_i1	1	2	10	14	5	3	2	0	0	0	0	0	1	3	0	0	0	0	0	0	0	0	0	0	0	0	0	0	0	0	0		YQMA	SCHPOAnkyrin repeat-containing protein P1E11.10 OS=Schizosaccharomyces pombe (strain 972 / ATCC 24843) OX=284812 GN=SPCP1E11.10 PE=4 SV=1
TRINITY_DN15258_c0_g1_i31	0	0	0.89	1	0	0	0	0	0	0	0	2.24	2.36	1.61	0	0	0	0	2	0.34	0.97	0.98	1	1.94	0	1	1.18	0	0	3	0		YQMA	SCHPOAnkyrin repeat-containing protein P1E11.10 OS=Schizosaccharomyces pombe (strain 972 / ATCC 24843) OX=284812 GN=SPCP1E11.10 PE=4 SV=1
TRINITY_DN27689_c0_g1_i14	0	0	5.5	3.03	5.61	6.99	0	6.02	0	0	0	0	9.74	0	2	4.89	0	0	11.08	0	0	3.15	0	0	2.57	2.2	0	0	3.82	0	0		YQMA	SCHPOAnkyrin repeat-containing protein P1E11.10 OS=Schizosaccharomyces pombe (strain 972 / ATCC 24843) OX=284812 GN=SPCP1E11.10 PE=4 SV=1
TRINITY_DN5665_c0_g1_i5	0	0	2	2	0	0	0	8	0	0	0	0	0	1	0	0	0	0	0	0	0	9	0	0	0.92	0	0	0	0	0	0		YQMA	SCHPOAnkyrin repeat-containing protein P1E11.10 OS=Schizosaccharomyces pombe (strain 972 / ATCC 24843) OX=284812 GN=SPCP1E11.10 PE=4 SV=1
TRINITY_DN59894_c0_g1_i18	0	0	1	0	0	0	0	0	2	0	0	0	0	0	0	0	0	0	1.38	0	0	0	0	3	0	0	0	0	1	0	0		YQMA	SCHPOAnkyrin repeat-containing protein P1E11.10 OS=Schizosaccharomyces pombe (strain 972 / ATCC 24843) OX=284812 GN=SPCP1E11.10 PE=4 SV=1
TRINITY_DN30336_c0_g1_i8	0	0	0	0	0	0	0	0	0	2	0	0	0	0	0	0	0	0	4.81	1	1.6	0	0	1	0	0	0	0	0	0	0		YQMA	SCHPOAnkyrin repeat-containing protein P1E11.10 OS=Schizosaccharomyces pombe (strain 972 / ATCC 24843) OX=284812 GN=SPCP1E11.10 PE=4 SV=1
TRINITY_DN27689_c0_g1_i34	2.98	5.67	3.54	3.18	0	7.01	9.58	6.39	9.01	0	0	0	7.7	3.13	0	1.73	7.05	0	10.95	10.7	0	0	0	12.35	10.24	3.7	0	9	3.86	0	0		YQMA	SCHPOAnkyrin repeat-containing protein P1E11.10 OS=Schizosaccharomyces pombe (strain 972 / ATCC 24843) OX=284812 GN=SPCP1E11.10 PE=4 SV=1
TRINITY_DN30336_c0_g1_i18	7	0	6.02	0	2.74	1.61	0.14	0	12.44	0	1.34	0	8.41	7.66	0	10.74	3.25	1.91	4.75	3.15	0	3.53	0	3.05	0.36	8.14	6.03	3.76	2.23	1.33	0		YQMA	SCHPOAnkyrin repeat-containing protein P1E11.10 OS=Schizosaccharomyces pombe (strain 972 / ATCC 24843) OX=284812 GN=SPCP1E11.10 PE=4 SV=1
TRINITY_DN27689_c0_g1_i9	0	0	3.37	5.85	0	0	0	2.16	0	0	0	0	0	0	0	4.63	0	0	4.8	0	1.75	0	0	4.52	3.09	0	0	0	4.82	0	0		YQMA	SCHPOAnkyrin repeat-containing protein P1E11.10 OS=Schizosaccharomyces pombe (strain 972 / ATCC 24843) OX=284812 GN=SPCP1E11.10 PE=4 SV=1
TRINITY_DN20794_c0_g1_i3	0	0	0	0	0	0	0	0	0	0	0	0	0	0	4.67	0	0	0	0	0	0	0	0	0	0	0	0	0	0	0	0		YQMA	SCHPOAnkyrin repeat-containing protein P1E11.10 OS=Schizosaccharomyces pombe (strain 972 / ATCC 24843) OX=284812 GN=SPCP1E11.10 PE=4 SV=1
TRINITY_DN30336_c0_g1_i1	0	0	0	2	0	0	0	0.99	0	0	0	0	0	0	0	1.93	0	0	0	0	0	0.21	0	2	0	0	0	0	0	0	0		YQMA	SCHPOAnkyrin repeat-containing protein P1E11.10 OS=Schizosaccharomyces pombe (strain 972 / ATCC 24843) OX=284812 GN=SPCP1E11.10 PE=4 SV=1
TRINITY_DN7412_c0_g2_i3	2	0	1	0	0	0	0	1	1	0	0	0	0	2	0	0	0	0	0	0	1	0	0	0	2	3	0	2	0	0	0		YQMA	SCHPOAnkyrin repeat-containing protein P1E11.10 OS=Schizosaccharomyces pombe (strain 972 / ATCC 24843) OX=284812 GN=SPCP1E11.10 PE=4 SV=1
TRINITY_DN30336_c0_g1_i11	0	0	0	0	0	0	1.84	1	0	2	0	0	4.09	0	0	0	0	0	0	1	0	4.87	0	0	1.9	0	12.15	1.98	0	0	0		YQMA	SCHPOAnkyrin repeat-containing protein P1E11.10 OS=Schizosaccharomyces pombe (strain 972 / ATCC 24843) OX=284812 GN=SPCP1E11.10 PE=4 SV=1
TRINITY_DN23221_c0_g1_i1	0	0	0	0	0	0	0	1	0	0	0	1	1	0	0	0	0	0	0	1	0	0	1.57	0	0	2	0	0	1.07	0	0		YQMA	SCHPOAnkyrin repeat-containing protein P1E11.10 OS=Schizosaccharomyces pombe (strain 972 / ATCC 24843) OX=284812 GN=SPCP1E11.10 PE=4 SV=1
TRINITY_DN2846_c0_g1_i2	0	0	1	2.38	0	0	0	0	0	0	0	1	1.31	0	0	0	0	0	2	1	0	0	0	0	0	0	1	0	0	0	0		YQMA	SCHPOAnkyrin repeat-containing protein P1E11.10 OS=Schizosaccharomyces pombe (strain 972 / ATCC 24843) OX=284812 GN=SPCP1E11.10 PE=4 SV=1
TRINITY_DN1648_c0_g1_i1	3.07	0	0	5	9	2.9	14.11	7	1.38	3.21	5.14	0	2.58	16.48	0	14	3.93	4.83	5.18	7	10.39	11.33	7.64	4.52	4.5	10.83	14	6.34	4.97	2	5.13		YQK1	SCHPOUPF0676 protein C1494.01 OS=Schizosaccharomyces pombe (strain 972 / ATCC 24843) OX=284812 GN=SPCC1494.01 PE=3 SV=2
TRINITY_DN1648_c0_g1_i17	1	0	0	8	2	2	6	4	3	8	23	19	9	16	0	6	1	2	0	1	1	9	647	13	0	3	2	6	0	0	0		YQK1	SCHPOUPF0676 protein C1494.01 OS=Schizosaccharomyces pombe (strain 972 / ATCC 24843) OX=284812 GN=SPCC1494.01 PE=3 SV=2
TRINITY_DN1648_c0_g1_i14	0	0	8	0	0	0	0	0	0.2	0	0	14	18.91	0	0	0	0	0	0	0	0	0	0	0	0	0	0	0.08	4.83	0	0		YQK1	SCHPOUPF0676 protein C1494.01 OS=Schizosaccharomyces pombe (strain 972 / ATCC 24843) OX=284812 GN=SPCC1494.01 PE=3 SV=2
TRINITY_DN1648_c0_g1_i4	2.91	0	0	0	0	10.1	0	0	0	0	4.77	0	0	18.83	0	0	7.46	1.17	13.82	0	4.61	0	9.36	6.9	6.05	0.42	0	3.47	0	0	0		YQK1	SCHPOUPF0676 protein C1494.01 OS=Schizosaccharomyces pombe (strain 972 / ATCC 24843) OX=284812 GN=SPCC1494.01 PE=3 SV=2
TRINITY_DN135510_c0_g1_i1	0	0	0	0	0	0	0	0	0	0	0	0	0	0	3	0	0	0	0	0	0	0	0	0	0	0	0	0	0	0	0		YQJQ	BACSUUncharacterized oxidoreductase YqjQ OS=Bacillus subtilis (strain 168) OX=224308 GN=yqjQ PE=3 SV=1
TRINITY_DN1559_c0_g1_i4	0	0	30.08	2.1	0	0	22.09	5.46	12.06	0	0	0	0	2.15	0	21.68	10.97	0	70.37	0	11.79	0	0	0	0	22.88	11.2	24.65	0	0	0		YQJG	ECOLIGlutathionyl-hydroquinone reductase YqjG OS=Escherichia coli (strain K12) OX=83333 GN=yqjG PE=1 SV=1
TRINITY_DN1559_c0_g1_i16	6.65	4.68	47.78	5.95	0	2.3	13.15	1.03	11.49	2.32	1.63	5.59	5.77	0	0	46.14	9.33	0.65	32.44	9.64	15.06	10.94	2.22	8.87	18.64	11.57	9.85	26.71	0	0.8	1.79		YQJG	ECOLIGlutathionyl-hydroquinone reductase YqjG OS=Escherichia coli (strain K12) OX=83333 GN=yqjG PE=1 SV=1
TRINITY_DN45357_c0_g2_i1	0	0	0	0	0	0	0	0	0	0	0	0	0	0	23	0	0	0	0	0	0	0	0	0	0	0	0	0	0	0	0		YQJG	ECOLIGlutathionyl-hydroquinone reductase YqjG OS=Escherichia coli (strain K12) OX=83333 GN=yqjG PE=1 SV=1
TRINITY_DN1559_c0_g1_i22	5.57	0	13.52	0	0	0	16.96	8.82	13.13	4.23	0	11	4.19	0	0	19.47	5.28	0	15.23	8.57	21.35	0	0	4.97	0	16.06	13.86	4.39	0	0	0		YQJG	ECOLIGlutathionyl-hydroquinone reductase YqjG OS=Escherichia coli (strain K12) OX=83333 GN=yqjG PE=1 SV=1
TRINITY_DN1559_c0_g1_i20	10.51	13.12	37.15	15.99	11.12	0.35	0	0.44	0	4.43	7.96	0	11.35	4.15	1	73.67	12.11	8.77	0	23.69	0	30.36	0	19.82	15.54	0	2.39	0	6.04	2.76	0		YQJG	ECOLIGlutathionyl-hydroquinone reductase YqjG OS=Escherichia coli (strain K12) OX=83333 GN=yqjG PE=1 SV=1
TRINITY_DN1559_c0_g1_i9	26.44	18.05	56.09	24.37	13.72	4.18	43.44	71.55	68.6	131.94	85.37	24.12	43.54	55.47	0	125.46	24.55	14.35	115.66	82.78	56.02	128.69	77.44	110.18	60.1	85.21	114.9	50.69	46.59	0	0		YQJG	ECOLIGlutathionyl-hydroquinone reductase YqjG OS=Escherichia coli (strain K12) OX=83333 GN=yqjG PE=1 SV=1
TRINITY_DN1559_c0_g1_i25	6.2	9.05	110.95	18.57	2.2	6.56	116.12	15.85	63.54	16.77	0.04	24.45	27.4	6.33	0	185.6	49.33	14.39	171.72	15.8	16.71	14.98	0	4.38	7.72	55.09	26.82	45.93	4.67	0	3.69		YQJG	ECOLIGlutathionyl-hydroquinone reductase YqjG OS=Escherichia coli (strain K12) OX=83333 GN=yqjG PE=1 SV=1
TRINITY_DN1428_c0_g1_i2	2.64	2.89	2.55	6.22	2.83	0.58	0	0	2.07	0	0	0	2.17	0	0	34.58	6.65	1.13	10.55	13.52	10.26	16.63	1.84	3.52	3.09	3.85	1.01	0	6.56	0	0		YQJG	ECOLIGlutathionyl-hydroquinone reductase YqjG OS=Escherichia coli (strain K12) OX=83333 GN=yqjG PE=1 SV=1
TRINITY_DN45357_c0_g1_i1	0	0	0	0	0	0	0	0	0	0	0	0	0	0	11	0	0	0	0	0	0	0	0	0	0	0	0	0	0	0	0		YQJG	ECOLIGlutathionyl-hydroquinone reductase YqjG OS=Escherichia coli (strain K12) OX=83333 GN=yqjG PE=1 SV=1
TRINITY_DN1559_c0_g1_i21	0	26.1	11.38	20.71	8.35	10.41	29.03	0	48.67	3.5	0	7.05	56.95	38.89	0	31.72	4.07	0	30.41	7.88	15.4	7.03	13.64	32.89	5.73	25.11	21.85	31.19	2.75	8.04	14.13		YQJG	ECOLIGlutathionyl-hydroquinone reductase YqjG OS=Escherichia coli (strain K12) OX=83333 GN=yqjG PE=1 SV=1
TRINITY_DN1428_c0_g1_i16	8.63	0	0	0	0	0	0	0	4.3	21	0	0	0	0	1.31	41.8	0	0	0	0	0	23.7	0	0	0	14.44	0	4.16	0	2.6	0		YQJG	ECOLIGlutathionyl-hydroquinone reductase YqjG OS=Escherichia coli (strain K12) OX=83333 GN=yqjG PE=1 SV=1
TRINITY_DN1428_c0_g1_i11	0	0	0	0	0	1.2	0	0	0	0	0	0	0	1	0	8.28	0	0	6.38	0	0	1.79	1.13	0	0	0	0	0	0	0	0		YQJG	ECOLIGlutathionyl-hydroquinone reductase YqjG OS=Escherichia coli (strain K12) OX=83333 GN=yqjG PE=1 SV=1
TRINITY_DN1559_c0_g1_i31	2.72	0	92.09	3.15	11.62	0	72.41	44.02	23.26	15.36	7	31.33	0	0	0	81.57	10.28	3.31	81.07	0	34.38	0	3.95	0	0	18.78	42.78	24.8	0	0	0.81		YQJG	ECOLIGlutathionyl-hydroquinone reductase YqjG OS=Escherichia coli (strain K12) OX=83333 GN=yqjG PE=1 SV=1
TRINITY_DN1428_c0_g1_i22	0	0	0	1	0	0	0	0	0	1	0	0	2	0	0	5.18	0	0	0	27.64	0	22.38	0	0	4.56	8.56	0	0	0	0	1		YQJG	ECOLIGlutathionyl-hydroquinone reductase YqjG OS=Escherichia coli (strain K12) OX=83333 GN=yqjG PE=1 SV=1
TRINITY_DN1428_c0_g1_i3	0	0	0	0	0	0	0	0	0	0	0	0	0	0	0	3.69	6.25	0	11.29	22.88	13.42	2.31	8.87	21.13	5.44	3.44	0	6	21.06	0	0		YQJG	ECOLIGlutathionyl-hydroquinone reductase YqjG OS=Escherichia coli (strain K12) OX=83333 GN=yqjG PE=1 SV=1
TRINITY_DN1559_c0_g1_i13	0	0	35.98	2.24	0	0	37.8	45.4	31.09	1.84	0	7.44	2.2	0	0	47.68	18.64	7.53	72.03	0	15.3	0	0	2.29	0	35.47	21.88	31.38	0	0	0		YQJG	ECOLIGlutathionyl-hydroquinone reductase YqjG OS=Escherichia coli (strain K12) OX=83333 GN=yqjG PE=1 SV=1
TRINITY_DN1428_c0_g1_i28	25.2	0	0	10.43	29.22	22.61	0	16.31	9.6	0	13.77	0	67.14	41.38	0	33.42	0	1.72	36.19	0	7.36	11.84	4.77	30.06	17.15	11.49	5.73	8.17	17.41	0	0		YQJG	ECOLIGlutathionyl-hydroquinone reductase YqjG OS=Escherichia coli (strain K12) OX=83333 GN=yqjG PE=1 SV=1
TRINITY_DN1428_c0_g1_i9	0	12.31	30.66	0	0	0	5.81	0	5.8	0	0	0	0	0	2.69	100.46	5.94	0	14.79	46.17	10.08	59.2	2.89	0	0	1.53	0	7.73	0	0	0		YQJG	ECOLIGlutathionyl-hydroquinone reductase YqjG OS=Escherichia coli (strain K12) OX=83333 GN=yqjG PE=1 SV=1
TRINITY_DN1428_c0_g1_i12	0	0	0.69	0	0	0	0	0	0	0	0	0	0	0	0	1.73	0	0.5	1.35	0.45	0	0	2.02	7.73	5.15	1.58	0	2.5	0	0.31	0		YQJG	ECOLIGlutathionyl-hydroquinone reductase YqjG OS=Escherichia coli (strain K12) OX=83333 GN=yqjG PE=1 SV=1
TRINITY_DN1428_c0_g1_i18	1.63	35.93	52.99	9.5	0	0	26.7	0	18.38	0	0	18.02	0	0	0	17.53	27.13	0	0	40.78	7.54	35.29	18.46	0	4.47	0	9.16	0	0	0	5.46		YQJG	ECOLIGlutathionyl-hydroquinone reductase YqjG OS=Escherichia coli (strain K12) OX=83333 GN=yqjG PE=1 SV=1
TRINITY_DN1428_c0_g1_i6	0	0	2.79	3	0	0	0	0	3.85	0	0	0	2.27	9.76	0	4.91	0	0	5.35	3.79	8.9	9.03	2.33	11.23	0	0	4.83	3.42	2.43	4.17	0		YQJG	ECOLIGlutathionyl-hydroquinone reductase YqjG OS=Escherichia coli (strain K12) OX=83333 GN=yqjG PE=1 SV=1
TRINITY_DN85684_c0_g1_i1	0	0	0	0	0	0	0	0	0	0	0	0	0	0	0	0	0	0	0	0	0	0	1	0	0	0	0	0	0	0	0		YQHD	ECOLIAlcohol dehydrogenase YqhD OS=Escherichia coli (strain K12) OX=83333 GN=yqhD PE=1 SV=1
TRINITY_DN116053_c0_g1_i1	0	0	0	0	0	0	0	0	0	0	0	0	0	0	0	0	0	0	0	0	0	2	0	0	0	0	0	0	0	0	0		YQHD	ECOLIAlcohol dehydrogenase YqhD OS=Escherichia coli (strain K12) OX=83333 GN=yqhD PE=1 SV=1
TRINITY_DN82455_c0_g1_i1	0	0	1	0	0	0	0	0	0	0	0	0	0	0	0	0	0	0	0	0	0	0	0	4	0	0	0	0	0	0	0		YQHD	ECOLIAlcohol dehydrogenase YqhD OS=Escherichia coli (strain K12) OX=83333 GN=yqhD PE=1 SV=1
TRINITY_DN110484_c0_g1_i1	0	0	1	0	0	0	0	0	0	0	0	0	1	0	0	0	0	0	0	0	0	0	0	0	0	0	0	0	0	0	0		YQEY	BACSUUncharacterized protein YqeY OS=Bacillus subtilis (strain 168) OX=224308 GN=yqeY PE=1 SV=1
TRINITY_DN131065_c0_g1_i1	0	1	0	0	0	0	0	0	0	0	0	0	0	0	0	0	0	0	0	0	0	0	0	0	0	0	0	0	0	0	0		YQEY	BACSUUncharacterized protein YqeY OS=Bacillus subtilis (strain 168) OX=224308 GN=yqeY PE=1 SV=1
TRINITY_DN67144_c0_g1_i1	0	1	0	0	0	0	3	0	0	1	1	1	1	0	2	5	1	1	12	4	6	3	4	0	0	0	0	0	0	0	0		YQBE	BACSUUncharacterized protein YqbE OS=Bacillus subtilis (strain 168) OX=224308 GN=yqbE PE=4 SV=2
TRINITY_DN103759_c0_g1_i1	1	0	0	0	1	0	0	0	0	0	0	0	0	0	0	0	0	0	0	0	0	0	0	0	0	0	0	0	0	0	0		YPU4	RHOCAUncharacterized 17.4 kDa protein in puhA 5'region OS=Rhodobacter capsulatus OX=1061 PE=4 SV=1
TRINITY_DN11242_c0_g1_i1	0	0	0	0	0	0	0	0	0	0	0	0	0	0	48	0	0	1	0	0	0	0	0	0	0	0	0	0	0	0	0		YPTV3	VOLCAGTP-binding protein yptV3 OS=Volvox carteri OX=3067 GN=YPTV3 PE=3 SV=1
TRINITY_DN4732_c0_g1_i9	0	3	6	2.14	1.05	2.03	1.56	1.55	0	0	2.12	0	6.38	3	2	1.01	1.04	2	1.05	0	0	0	2	0	0	1.02	7.69	0	0.76	1	1.13		YPTV3	VOLCAGTP-binding protein yptV3 OS=Volvox carteri OX=3067 GN=YPTV3 PE=3 SV=1
TRINITY_DN70586_c0_g1_i1	0	0	0	0	0	0	0	0	0	0	0	0	0	0	5	0	0	0	0	0	0	0	0	0	0	0	0	0	0	0	0		YPTV3	VOLCAGTP-binding protein yptV3 OS=Volvox carteri OX=3067 GN=YPTV3 PE=3 SV=1
TRINITY_DN41727_c0_g1_i1	0	0	0	0	0	0	0	0	0	0	1	0	0	2	0	0	1	0	0	0	0	0	0	0	0	0	0	0	0	0	0		YPTC6	CHLRERas-related protein YPTC6 OS=Chlamydomonas reinhardtii OX=3055 GN=YPTC6 PE=3 SV=1
TRINITY_DN1901_c0_g1_i16	0	1.14	0	0	0	0	0	0	1.14	0	0	0	0	0	0	1.17	0	0	1.34	0	0	0	0	0	0	0	0	0	0	0	0		YPTC6	CHLRERas-related protein YPTC6 OS=Chlamydomonas reinhardtii OX=3055 GN=YPTC6 PE=3 SV=1
TRINITY_DN15176_c0_g1_i2	1.47	4	2	3.11	1	3	5.01	0	3.18	2.58	5	0	0	1	0	2.79	0	0	8	0	0	0	0	0	2	2	0	0	0	2	1		YPTC4	CHLREGTP-binding protein YPTC4 OS=Chlamydomonas reinhardtii OX=3055 GN=YPTC4 PE=3 SV=1
TRINITY_DN15176_c0_g1_i1	1.93	0	0	1.53	0	0	0	6.01	0	2.42	0	4.03	5	0	0	2.21	0	0	0	6.41	1.93	2	2	2.09	0	0	5	4	4.01	0	0		YPTC4	CHLREGTP-binding protein YPTC4 OS=Chlamydomonas reinhardtii OX=3055 GN=YPTC4 PE=3 SV=1
TRINITY_DN24378_c0_g1_i2	0	0	0	0	0	0	0	0	0	0	0	0	0	0	6.44	0	0	0	0	0	0	0	0	0	0	0	0	0	0	0	0		YPTC1	CHLREGTP-binding protein YPTC1 OS=Chlamydomonas reinhardtii OX=3055 GN=YPTC1 PE=3 SV=1
TRINITY_DN60590_c0_g1_i1	0	0	0	0	0	0	0	0	0	0	0	0	0	0	50	0	0	0	0	0	0	0	0	0	0	0	0	0	0	0	0		YPT71	SCHPOGTP-binding protein ypt71 OS=Schizosaccharomyces pombe (strain 972 / ATCC 24843) OX=284812 GN=ypt71 PE=3 SV=1
TRINITY_DN23325_c0_g1_i2	0	0	0	0	0	0	0	1	0	1	0	0	0	0	0	0	1	0	0	0	0	0	1	0	0	0	3	0	0	1	0.52		YPT7	SCHPOGTP-binding protein ypt7 OS=Schizosaccharomyces pombe (strain 972 / ATCC 24843) OX=284812 GN=ypt7 PE=3 SV=1
TRINITY_DN104027_c0_g1_i1	0	0	0	0	0	0	0	0	0	0	0	0	0	0	16	0	0	0	0	0	0	0	0	0	0	0	0	0	0	0	0		YPT7	SCHPOGTP-binding protein ypt7 OS=Schizosaccharomyces pombe (strain 972 / ATCC 24843) OX=284812 GN=ypt7 PE=3 SV=1
TRINITY_DN14177_c0_g1_i3	5.66	0	2	1.29	3	2	1.44	4	7	5	5	3	20.39	2	2	8	8	5	6.83	8.14	2	8.11	1	7	2.87	4	3	3	1	1	1		YPT6	YEASTGTP-binding protein YPT6 OS=Saccharomyces cerevisiae (strain ATCC 204508 / S288c) OX=559292 GN=YPT6 PE=1 SV=1
TRINITY_DN59144_c0_g1_i1	0	0	0	0	0	0	0	0	0	0	0	0	0	0	2	0	0	0	0	0	0	0	0	0	0	0	0	0	0	0	0		YPT32	YEASTGTP-binding protein YPT32/YPT11 OS=Saccharomyces cerevisiae (strain ATCC 204508 / S288c) OX=559292 GN=YPT32 PE=1 SV=3
TRINITY_DN92743_c0_g1_i1	0	0	0	0	0	0	0	0	0	0	0	0	0	0	23	0	0	0	0	0	0	0	0	0	0	0	0	0	0	0	0		YPT2	SCHPOGTP-binding protein ypt2 OS=Schizosaccharomyces pombe (strain 972 / ATCC 24843) OX=284812 GN=ypt2 PE=3 SV=1
TRINITY_DN3741_c0_g2_i38	0	3.92	0	8.22	0	0.1	0	0	2.74	0	0	0	0	2.45	0	0	2.54	0	0	7.45	3.12	0	0	0	0	2.73	0	0	0	1.96	0		YPT1	YEASTGTP-binding protein YPT1 OS=Saccharomyces cerevisiae (strain ATCC 204508 / S288c) OX=559292 GN=YPT1 PE=1 SV=2
TRINITY_DN3204_c0_g2_i13	11.46	7.99	0	4.89	4.6	7.43	0	1.03	12.07	3.76	9.68	0	17.81	0	2.16	2.9	3.39	4.07	8.53	2.28	2.29	0	8.08	3.26	0	6.33	9.43	7.83	5.44	2.49	1.48		YPT1	SCHPOGTP-binding protein ypt1 OS=Schizosaccharomyces pombe (strain 972 / ATCC 24843) OX=284812 GN=ypt1 PE=1 SV=2
TRINITY_DN3741_c0_g2_i34	4.64	5.73	9.07	9.05	0.5	5.01	0	0	0	9.72	0	0	0	6.36	0	0	0	0	0	0	0	0	0	0	0	0	0	0	6.09	0	0		YPT1	PHYINRas-like GTP-binding protein YPT1 OS=Phytophthora infestans OX=4787 GN=YPT1 PE=3 SV=1
TRINITY_DN2004_c0_g1_i8	0	3.53	30.2	21.7	11.18	13.52	29.34	33.27	12.72	11.52	0	4.85	0	20.92	0	21.07	0.22	11.56	28.84	19.28	0	22.62	35.65	26.64	23.2	17.32	0	10.92	0	0	1.44		YPT1	PHYINRas-like GTP-binding protein YPT1 OS=Phytophthora infestans OX=4787 GN=YPT1 PE=3 SV=1
TRINITY_DN43763_c0_g1_i1	0	0	0	0	0	0	0	0	0	0	0	0	0	0	22	0	0	0	0	0	0	0	0	0	0	0	0	0	0	0	0		YPT1	PHYINRas-like GTP-binding protein YPT1 OS=Phytophthora infestans OX=4787 GN=YPT1 PE=3 SV=1
TRINITY_DN3741_c0_g2_i35	0	0	4.58	0	6.69	0	3.04	0	2.85	0	0	0	0	0	0	0	0	0	0	0	0	0	0	0	0	0	0	0	0	0	0		YPT1	PHYINRas-like GTP-binding protein YPT1 OS=Phytophthora infestans OX=4787 GN=YPT1 PE=3 SV=1
TRINITY_DN21262_c0_g1_i1	1	3	1	0	0	1	4	3	2	0	5	6	5	8	0	11	0	0	7	8	3	5	17	2	4	0	1	3	16	0	14		YPQQ	PSEPHHydrolase in pqqF 5'region OS=Pseudomonas protegens (strain DSM 19095 / LMG 27888 / CHA0) OX=1124983 PE=3 SV=1
TRINITY_DN106811_c0_g1_i1	0	0	0	0	0	0	0	0	0	0	0	0	0	0	12	0	0	0	0	0	0	0	0	0	0	0	0	0	0	0	0		YPQQ	PSEPHHydrolase in pqqF 5'region OS=Pseudomonas protegens (strain DSM 19095 / LMG 27888 / CHA0) OX=1124983 PE=3 SV=1
TRINITY_DN2257_c1_g1_i1	11	5	6	5	4	9	4	2	5	4	4	6	13	6	0	15	4	1	7	10	5	17	4	4	4	4	7	4	4	4	3		YPQQ	PSEPHHydrolase in pqqF 5'region OS=Pseudomonas protegens (strain DSM 19095 / LMG 27888 / CHA0) OX=1124983 PE=3 SV=1
TRINITY_DN3044_c1_g1_i17	7.54	8.51	13.24	10.89	6.91	9.1	3.17	20.38	1.32	7.37	4.53	6.23	22.03	22.48	0	14	4	0	17.58	16.14	5	20.72	13	15.72	2.67	10.44	7.89	3.55	12.59	0	0		YPQ1	YEASTProbable vacuolar amino acid transporter YPQ1 OS=Saccharomyces cerevisiae (strain ATCC 204508 / S288c) OX=559292 GN=YPQ1 PE=1 SV=1
TRINITY_DN3044_c1_g1_i13	0	0	0	0	0	0	0	0	0	0	0	0	0	0	0	0	0	0	0	0	0	0	0	0	0	0	0	0	0	0	0		YPQ1	YEASTProbable vacuolar amino acid transporter YPQ1 OS=Saccharomyces cerevisiae (strain ATCC 204508 / S288c) OX=559292 GN=YPQ1 PE=1 SV=1
TRINITY_DN3044_c1_g1_i16	0	0	0	0	1.38	0	0	0	6.09	0	0	0	0	1.91	0	0	0	0	0	0	0	0	0	0	0	0	0	0	0	0	0		YPQ1	YEASTProbable vacuolar amino acid transporter YPQ1 OS=Saccharomyces cerevisiae (strain ATCC 204508 / S288c) OX=559292 GN=YPQ1 PE=1 SV=1
TRINITY_DN10571_c0_g1_i3	0	18.42	0	3.11	0	0	0	0	0	0	0	1.56	0	0	0	0	0	0	0	0	0	0	0	0	0	0	0	0	0	0	0		YPQ1	YEASTProbable vacuolar amino acid transporter YPQ1 OS=Saccharomyces cerevisiae (strain ATCC 204508 / S288c) OX=559292 GN=YPQ1 PE=1 SV=1
TRINITY_DN3044_c1_g1_i15	0	0	0	0.99	0	0	4.28	0	0	1.63	0	1.77	9.65	1.65	0	0	0	4	6.65	0	0	0	0	0	0	0	0	0	0	0	0		YPQ1	YEASTProbable vacuolar amino acid transporter YPQ1 OS=Saccharomyces cerevisiae (strain ATCC 204508 / S288c) OX=559292 GN=YPQ1 PE=1 SV=1
TRINITY_DN3044_c1_g1_i6	0	0	0	0	0	0	4.54	0	1.77	0	0	0	0	0	0	0	0	0	0	0	0	0	0	0	0	0	0	2.45	0	1	1		YPQ1	YEASTProbable vacuolar amino acid transporter YPQ1 OS=Saccharomyces cerevisiae (strain ATCC 204508 / S288c) OX=559292 GN=YPQ1 PE=1 SV=1
TRINITY_DN3044_c1_g1_i7	4.46	5.49	1.76	1.9	0	2.9	0	5.62	4.22	0	3.47	0	2.32	4.95	0	0	0	0	1.19	1.86	0	2.28	0	3.28	2.33	9.56	9.11	0	5.41	0	2		YPQ1	YEASTProbable vacuolar amino acid transporter YPQ1 OS=Saccharomyces cerevisiae (strain ATCC 204508 / S288c) OX=559292 GN=YPQ1 PE=1 SV=1
TRINITY_DN25748_c2_g1_i1	0	0	0	0	0	0	0	0	0	0	0	0	0	0	0	0	0	0	0	0	0	0	0	0	0	0	0	0	0	0	0		YPK2	YEASTSerine/threonine-protein kinase YPK2/YKR2 OS=Saccharomyces cerevisiae (strain ATCC 204508 / S288c) OX=559292 GN=YPK2 PE=1 SV=1
TRINITY_DN81869_c0_g1_i1	0	0	0	0	0	0	0	0	0	0	0	0	0	0	3	0	0	0	0	0	0	0	0	0	0	0	0	0	0	0	0		YPEL5	BOVINProtein yippee-like 5 OS=Bos taurus OX=9913 GN=YPEL5 PE=2 SV=1
TRINITY_DN38040_c0_g1_i1	0	0	0	0	0	0	0	0	0	0	0	0	0	0	0	0	3	0	0	0	0	0	0	0	0	0	0	0	0	0	0		YPEL2	BOVINProtein yippee-like 2 OS=Bos taurus OX=9913 GN=YPEL2 PE=3 SV=1
TRINITY_DN128592_c0_g1_i1	0	0	0	0	0	0	0	0	0	0	0	0	0	0	4	0	0	0	0	0	0	0	0	0	0	0	0	0	0	0	0		YPEL1	MOUSEProtein yippee-like 1 OS=Mus musculus OX=10090 GN=Ypel1 PE=2 SV=1
TRINITY_DN36321_c0_g3_i1	0	0	0	0	0	0	0	0	0	0	0	0	0	0	36.05	0	0	0	0	1	0	0	0	0	0	0	0	0	0	0	0		YPD1	CAEELUncharacterized protein C05D11.1 OS=Caenorhabditis elegans OX=6239 GN=C05D11.1 PE=4 SV=2
TRINITY_DN1612_c0_g1_i10	86.85	66.44	178.81	160.45	60.4	66.51	105.6	57.3	57.74	50.68	83	66.28	153.58	45.8	4	112.12	31.66	19.35	100	94.64	30.13	50.13	41.53	45.38	43.38	96	81	32.73	59	11.24	12		YPD1	CAEELUncharacterized protein C05D11.1 OS=Caenorhabditis elegans OX=6239 GN=C05D11.1 PE=4 SV=2
TRINITY_DN36321_c0_g2_i1	0	0	0	0	0	0	0	0	0	0	0	0	0	0	50	0	0	0	0	0	0	0	0	0	0	0	0	0	0	0	0		YPD1	CAEELUncharacterized protein C05D11.1 OS=Caenorhabditis elegans OX=6239 GN=C05D11.1 PE=4 SV=2
TRINITY_DN36321_c0_g3_i2	0	0	0	0	0	0	0	0	0	0	0	0	0	0	8.95	0	0	0	0	0	0	0	0	0	0	0	0	0	0	0	0		YPD1	CAEELUncharacterized protein C05D11.1 OS=Caenorhabditis elegans OX=6239 GN=C05D11.1 PE=4 SV=2
TRINITY_DN1612_c0_g1_i8	27.15	21.5	3.19	16.55	93.6	0	15.4	14.7	12.31	25.32	0	11.72	0	31.61	0	46.88	3.64	10.65	64	62.36	40.87	49.09	56.47	31.62	34.62	0	0	26.58	0	0	0		YPD1	CAEELUncharacterized protein C05D11.1 OS=Caenorhabditis elegans OX=6239 GN=C05D11.1 PE=4 SV=2
TRINITY_DN1612_c0_g1_i5	0	49.06	0	0	0	90.49	0	0	42.95	0	0	0	89.42	40.59	0	0	35.7	0	0	0	0	72.78	0	0	0	0	0	5.68	0	3.76	0		YPD1	CAEELUncharacterized protein C05D11.1 OS=Caenorhabditis elegans OX=6239 GN=C05D11.1 PE=4 SV=2
TRINITY_DN99851_c0_g1_i1	0	0	1	0	0	0	0	0	0	0	0	0	0	0	0	0	0	0	0	0	0	1	0	0	0	0	0	0	0	0	0		YPC1	ECOLXUncharacterized 27.6 kDa protein OS=Escherichia coli OX=562 PE=3 SV=2
TRINITY_DN22132_c0_g1_i3	0	0	0	0	0	0	0	0	0	0	0	0	0	0	20	0	0	0	0	0	0	0	0	0	0	0	0	0	0	0	0		YPBR	BACSUUncharacterized protein YpbR OS=Bacillus subtilis (strain 168) OX=224308 GN=ypbR PE=4 SV=1
TRINITY_DN90482_c0_g1_i1	0	0	0	0	0	0	0	0	0	0	0	0	0	0	28	0	0	0	0	0	0	0	0	0	0	0	0	0	0	0	0		YPBR	BACSUUncharacterized protein YpbR OS=Bacillus subtilis (strain 168) OX=224308 GN=ypbR PE=4 SV=1
TRINITY_DN64276_c0_g1_i1	0	0	0	1	0	0	0	0	0	0	0	0	0	0	0	0	0	0	1	0	0	0	0	0	0	0	0	0	0	0	0		YP65	CAEELUncharacterized protein B0495.5 OS=Caenorhabditis elegans OX=6239 GN=B0495.5 PE=4 SV=2
TRINITY_DN3923_c0_g1_i8	5.64	6.54	13.63	7.12	1.9	1.79	8.4	2.95	2.07	0	0	4.97	0	3.35	0	0	1.59	0	3.53	0	0	2.41	11.43	0	1.6	3.17	2.37	0	2.18	0	0		YOW5	SCHPOPseudouridine-metabolizing bifunctional protein C1861.05 OS=Schizosaccharomyces pombe (strain 972 / ATCC 24843) OX=284812 GN=SPBC1861.05 PE=3 SV=1
TRINITY_DN3923_c0_g1_i13	0	0	11.78	0	0	31.93	0	0	17.26	0	0	5.39	8.75	6.53	0	0	6.92	0	25.49	0	0	12.54	8.3	7.54	0	0	0	12.92	5.16	0	0		YOW5	SCHPOPseudouridine-metabolizing bifunctional protein C1861.05 OS=Schizosaccharomyces pombe (strain 972 / ATCC 24843) OX=284812 GN=SPBC1861.05 PE=3 SV=1
TRINITY_DN3923_c0_g1_i5	7.48	0	3.48	11.32	12.86	3.54	0	0	10.05	0	10.17	0	8.78	0	0	0	0	0	0	0	0	2.31	0	12.45	0	0	0	0	23	0	0		YOW5	SCHPOPseudouridine-metabolizing bifunctional protein C1861.05 OS=Schizosaccharomyces pombe (strain 972 / ATCC 24843) OX=284812 GN=SPBC1861.05 PE=3 SV=1
TRINITY_DN3923_c0_g1_i6	4.16	0	0	3.29	5.01	0	0	0	6.08	4.57	1.89	0	2.12	0	0	3.25	0	0	0	0	0	0	2.76	0	0	0	0	0	6.05	0	0		YOW5	SCHPOPseudouridine-metabolizing bifunctional protein C1861.05 OS=Schizosaccharomyces pombe (strain 972 / ATCC 24843) OX=284812 GN=SPBC1861.05 PE=3 SV=1
TRINITY_DN3923_c0_g1_i10	0	3.3	2.5	6.28	0	5.07	25.28	4.14	0	3.5	0	0	13.33	0	0	15.96	1.86	0	11.74	12.57	0	4.01	39.8	7.18	2.14	5.17	7	5.6	0	0	0		YOW5	SCHPOPseudouridine-metabolizing bifunctional protein C1861.05 OS=Schizosaccharomyces pombe (strain 972 / ATCC 24843) OX=284812 GN=SPBC1861.05 PE=3 SV=1
TRINITY_DN3923_c0_g1_i4	54.57	40.21	77.39	60.34	44.13	66.14	22.14	30.27	25.78	24.47	35.45	12.13	108.99	37.22	7	65.11	16.28	19.06	62.93	33.12	17.5	36.37	90.04	35.38	27.92	11.61	19.87	18.8	51.39	38.04	32.76		YOW5	SCHPOPseudouridine-metabolizing bifunctional protein C1861.05 OS=Schizosaccharomyces pombe (strain 972 / ATCC 24843) OX=284812 GN=SPBC1861.05 PE=3 SV=1
TRINITY_DN3923_c0_g1_i11	0	0	6.83	0	10.64	5.8	0	0	0	0	0	3.58	0	2.56	0	0	5.26	0	22.52	0	2.89	8.98	0	7.47	0	11.7	0	0	0	6.96	4.24		YOW5	SCHPOPseudouridine-metabolizing bifunctional protein C1861.05 OS=Schizosaccharomyces pombe (strain 972 / ATCC 24843) OX=284812 GN=SPBC1861.05 PE=3 SV=1
TRINITY_DN32395_c0_g1_i4	3	0	0	0	0	1	0	0	0	0	0	0	4	3	0	2	1	0	0	3	0	2	3	0	2	0	2	3	0	0	0		YORF	SCHPOUncharacterized RING finger protein P8B7.15c OS=Schizosaccharomyces pombe (strain 972 / ATCC 24843) OX=284812 GN=SPBP8B7.15c PE=4 SV=1
TRINITY_DN32395_c0_g1_i6	0	1	0	1	0	0	1	0	0	0	0	2	0	0	0	0	0	0	1	0	0	0	0	1	0	0	0	0	0	0	0		YORF	SCHPOUncharacterized RING finger protein P8B7.15c OS=Schizosaccharomyces pombe (strain 972 / ATCC 24843) OX=284812 GN=SPBP8B7.15c PE=4 SV=1
TRINITY_DN114441_c0_g1_i1	0	0	0	0	0	0	1	0	0	0	0	0	1	0	0	0	0	0	0	0	0	0	0	0	0	0	0	0	0	0	0		YOGA	BACSUUncharacterized zinc-type alcohol dehydrogenase-like protein YogA OS=Bacillus subtilis (strain 168) OX=224308 GN=yogA PE=3 SV=1
TRINITY_DN132953_c0_g1_i1	0	0	0	0	0	0	0	0	0	2	0	0	0	0	0	0	0	0	0	0	0	0	0	0	0	0	0	0	0	1	0		YOGA	BACSUUncharacterized zinc-type alcohol dehydrogenase-like protein YogA OS=Bacillus subtilis (strain 168) OX=224308 GN=yogA PE=3 SV=1
TRINITY_DN77667_c0_g1_i1	0	1	0	0	0	0	2	0	0	0	0	2	0	0	0	1	0	0	1	0	0	0	1	0	0	0	0	0	0	0	0		YOCR	BACSUUncharacterized sodium-dependent transporter YocR OS=Bacillus subtilis (strain 168) OX=224308 GN=yocR PE=3 SV=1
TRINITY_DN139216_c0_g1_i1	0	0	0	0	0	0	4	0	0	0	0	0	0	0	0	0	0	0	0	0	0	0	0	0	0	0	0	0	0	0	0		YOCE	SCHPOUncharacterized RNA-binding protein C4F6.14 OS=Schizosaccharomyces pombe (strain 972 / ATCC 24843) OX=284812 GN=SPBC4F6.14 PE=1 SV=1
TRINITY_DN133828_c0_g1_i1	0	0	0	0	0	0	0	0	0	0	0	0	0	0	203	0	0	0	0	1	0	0	0	0	0	4	0	0	0	0	0		YOBN	BACSUPutative L-amino-acid oxidase YobN OS=Bacillus subtilis (strain 168) OX=224308 GN=yobN PE=3 SV=3
TRINITY_DN1554_c0_g1_i16	0	0	0	0	0	0	0	0	0	0	2.53	0	0	0	0	3.81	0	0	0	0	0	0	0	5.15	4.56	0	23.4	0	0	0	0		YOBN	BACSUPutative L-amino-acid oxidase YobN OS=Bacillus subtilis (strain 168) OX=224308 GN=yobN PE=3 SV=3
TRINITY_DN1132_c0_g1_i1	1.22	3.37	0	0.5	4.92	0.64	3.92	0	2.55	0	4.12	2	13.31	0	0.5	0	1	0	0	6.73	0	2	5.3	0	0	2.8	0	7	11.6	10.75	10.07		YOBN	BACSUPutative L-amino-acid oxidase YobN OS=Bacillus subtilis (strain 168) OX=224308 GN=yobN PE=3 SV=3
TRINITY_DN1554_c0_g1_i22	21.68	2.32	29.33	11.38	2.15	2.08	31.86	29.8	50	33.06	44.78	14.34	7.61	15.8	1.25	27.71	10.19	0	2.42	2.19	2.3	45.53	14.45	37.92	37.08	0	60.38	8.72	22.42	7.24	10.38		YOBN	BACSUPutative L-amino-acid oxidase YobN OS=Bacillus subtilis (strain 168) OX=224308 GN=yobN PE=3 SV=3
TRINITY_DN1554_c0_g1_i3	9.82	0	16.36	16.6	0	0	45.19	12.87	38	12.37	6.46	0	11.31	18.56	0	21.6	5.65	0	0	0	3.36	32.76	12.28	2.86	12.07	0	10.82	0	18.06	0	17.92		YOBN	BACSUPutative L-amino-acid oxidase YobN OS=Bacillus subtilis (strain 168) OX=224308 GN=yobN PE=3 SV=3
TRINITY_DN1554_c0_g1_i20	0	48.68	40.31	46.02	104.85	186.92	0	119.33	0	103.57	132.31	19.98	88.76	21.05	8.75	0	43.6	60	481.52	387.31	57.34	401.78	18	0	0	393.77	339.16	474.57	230.51	0	0		YOBN	BACSUPutative L-amino-acid oxidase YobN OS=Bacillus subtilis (strain 168) OX=224308 GN=yobN PE=3 SV=3
TRINITY_DN1554_c0_g1_i28	1.5	0	0	15	0	0	0	0	0	0	0	0	0	0	0	0	17.56	0	0	0	0	24.93	1.27	1.49	2.24	0	27.62	0	0	1.72	2.55		YOBN	BACSUPutative L-amino-acid oxidase YobN OS=Bacillus subtilis (strain 168) OX=224308 GN=yobN PE=3 SV=3
TRINITY_DN1554_c0_g1_i25	0	0	0	0	0	0	0	0	0	0	1.52	8.68	0	3.6	0	0	0	0	0	4.5	0	0	0	6.06	2.86	0	7.68	4.71	0	5.98	8.15		YOBN	BACSUPutative L-amino-acid oxidase YobN OS=Bacillus subtilis (strain 168) OX=224308 GN=yobN PE=3 SV=3
TRINITY_DN1554_c0_g1_i19	0	0	0	0	0	0	2.95	0	0	0	0	0	3.32	0	0	1.7	0	0	0	0	0	0	0	3.22	9.88	0	5.5	0	0	1.18	0		YOBN	BACSUPutative L-amino-acid oxidase YobN OS=Bacillus subtilis (strain 168) OX=224308 GN=yobN PE=3 SV=3
TRINITY_DN1132_c0_g1_i2	1.55	3.2	0	1	4.08	1.72	5.24	1	3.45	1	1.94	0	3.69	0.89	0	0.06	0	0	2.35	1.27	0	2	3.76	0	1	2.2	1.67	0	2.4	0	6.33		YOBN	BACSUPutative L-amino-acid oxidase YobN OS=Bacillus subtilis (strain 168) OX=224308 GN=yobN PE=3 SV=3
TRINITY_DN127537_c0_g1_i1	0	0	0	1	0	0	0	0	0	1	0	0	0	0	0	0	0	0	0	0	0	0	0	0	0	0	0	0	0	0	0		YO098	YEASTUncharacterized protein YOL098C OS=Saccharomyces cerevisiae (strain ATCC 204508 / S288c) OX=559292 GN=YOL098C PE=1 SV=1
TRINITY_DN1653_c0_g1_i54	14.65	0	0	13.04	0	12.36	27.16	27.11	19.74	0	29.08	9.31	17.85	35.95	0	0	0	0	47.12	30	25.02	49.17	0	0	0	38.32	44.81	32.22	0	0	0		YNS9	SCHPOUncharacterized protein C18H10.09 OS=Schizosaccharomyces pombe (strain 972 / ATCC 24843) OX=284812 GN=SPBC18H10.09 PE=4 SV=2
TRINITY_DN1653_c0_g1_i140	12.23	55.43	126.53	177.98	105.95	0	0	0	0	0	40.48	0	0	55.32	0	51.78	42.05	22.3	30.53	143.91	0	21.59	58.36	0	90.1	94.15	0	0	161.34	0	0		YNS9	SCHPOUncharacterized protein C18H10.09 OS=Schizosaccharomyces pombe (strain 972 / ATCC 24843) OX=284812 GN=SPBC18H10.09 PE=4 SV=2
TRINITY_DN32586_c1_g1_i1	0	0	0	0	0	0	0	0	0	0	0	0	0	0	4	0	0	0	0	0	0	0	0	0	0	0	0	0	0	0	0		YNS9	SCHPOUncharacterized protein C18H10.09 OS=Schizosaccharomyces pombe (strain 972 / ATCC 24843) OX=284812 GN=SPBC18H10.09 PE=4 SV=2
TRINITY_DN32586_c1_g2_i2	0	0	0	0	0	0	0	0	0	0	0	0	0	0	11.03	0	0	1	0	0	0	0	0	0	0	0	0	0	0	0	0		YNS9	SCHPOUncharacterized protein C18H10.09 OS=Schizosaccharomyces pombe (strain 972 / ATCC 24843) OX=284812 GN=SPBC18H10.09 PE=4 SV=2
TRINITY_DN1653_c0_g1_i43	0	0	0	0	38.65	108.38	0	0	15.21	19.59	0	0	0	0	0	79.64	31.22	0	118.94	0	20.83	0	3.09	295.67	40.74	0	68.6	105.63	15.17	75.29	67.13		YNS9	SCHPOUncharacterized protein C18H10.09 OS=Schizosaccharomyces pombe (strain 972 / ATCC 24843) OX=284812 GN=SPBC18H10.09 PE=4 SV=2
TRINITY_DN1653_c0_g1_i127	12.48	9.43	0	0	14.64	31.92	9.82	13.59	29.35	0	0	12.86	18.08	0	0	6.89	16.84	4.41	23.21	28.02	0	28.11	9.35	8.32	23.62	31.49	15.67	7.36	37.83	3.71	8.87		YNS9	SCHPOUncharacterized protein C18H10.09 OS=Schizosaccharomyces pombe (strain 972 / ATCC 24843) OX=284812 GN=SPBC18H10.09 PE=4 SV=2
TRINITY_DN32586_c1_g2_i1	0	0	0	0	0	0	0	0	0	0	0	0	0	0	1.97	0	0	0	0	0	0	0	0	0	0	0	0	0	0	0	0		YNS9	SCHPOUncharacterized protein C18H10.09 OS=Schizosaccharomyces pombe (strain 972 / ATCC 24843) OX=284812 GN=SPBC18H10.09 PE=4 SV=2
TRINITY_DN1653_c0_g1_i105	107.54	46.95	0	0	0	0	48.27	72.36	34.92	43	0	37.45	145.92	0	0	0	0	0	0	0	18.39	54.35	0	0	0	0	0	0	0	0	0		YNS9	SCHPOUncharacterized protein C18H10.09 OS=Schizosaccharomyces pombe (strain 972 / ATCC 24843) OX=284812 GN=SPBC18H10.09 PE=4 SV=2
TRINITY_DN136271_c0_g1_i1	0	0	0	0	0	0	0	0	0	0	0	0	0	0	3	0	0	0	0	0	0	0	0	0	0	0	0	0	0	0	0		YNJE	ECOLIThiosulfate sulfurtransferase YnjE OS=Escherichia coli (strain K12) OX=83333 GN=ynjE PE=1 SV=2
TRINITY_DN85908_c0_g1_i1	0	0	0	0	0	0	0	0	0	0	0	0	0	0	3	0	0	0	0	0	0	0	0	0	0	0	0	0	0	0	0		YNG2	YEASTChromatin modification-related protein YNG2 OS=Saccharomyces cerevisiae (strain ATCC 204508 / S288c) OX=559292 GN=YNG2 PE=1 SV=1
TRINITY_DN146_c2_g1_i3	0	22.86	19.15	0	14.49	7.73	66.52	0	0	11.23	4.97	17.39	0	0	0	4.43	0	1	7.37	0	13	0	3.2	7.86	28.17	2.81	20.21	11.24	9.6	9.1	17		YNG2	KLULAChromatin modification-related protein YNG2 OS=Kluyveromyces lactis (strain ATCC 8585 / CBS 2359 / DSM 70799 / NBRC 1267 / NRRL Y-1140 / WM37) OX=284590 GN=YNG2 PE=3 SV=1
TRINITY_DN65279_c0_g1_i1	0	0	0	0	0	0	0	0	0	0	0	0	0	0	4	0	0	0	0	0	0	0	0	0	0	0	0	0	0	0	0		YNG2	KLULAChromatin modification-related protein YNG2 OS=Kluyveromyces lactis (strain ATCC 8585 / CBS 2359 / DSM 70799 / NBRC 1267 / NRRL Y-1140 / WM37) OX=284590 GN=YNG2 PE=3 SV=1
TRINITY_DN146_c2_g1_i10	6.6	0	0	20.49	0	0	26.77	18.57	0	9.69	0	0	20.03	27.91	0	0	0	0	0	0	0	0	0	0	0	0	0	0	0	0	0		YNG2	KLULAChromatin modification-related protein YNG2 OS=Kluyveromyces lactis (strain ATCC 8585 / CBS 2359 / DSM 70799 / NBRC 1267 / NRRL Y-1140 / WM37) OX=284590 GN=YNG2 PE=3 SV=1
TRINITY_DN146_c2_g1_i15	3.35	0	0	0	2.53	5.82	0	0	9.73	0	0	0	8.52	8.51	0	1.74	3.29	0	0	4.21	0	5	3.44	0	3.83	9.72	0	4.11	0	0	0		YNG2	KLULAChromatin modification-related protein YNG2 OS=Kluyveromyces lactis (strain ATCC 8585 / CBS 2359 / DSM 70799 / NBRC 1267 / NRRL Y-1140 / WM37) OX=284590 GN=YNG2 PE=3 SV=1
TRINITY_DN146_c2_g1_i11	6.04	0	0	2.73	0	4.45	0	0	15.52	0	11.03	0	4.45	4.73	0	1.2	0	0	0	0	0	0	0	4.75	0	4.62	0	0	0	2.26	0		YNG2	KLULAChromatin modification-related protein YNG2 OS=Kluyveromyces lactis (strain ATCC 8585 / CBS 2359 / DSM 70799 / NBRC 1267 / NRRL Y-1140 / WM37) OX=284590 GN=YNG2 PE=3 SV=1
TRINITY_DN46562_c0_g1_i1	0	0	0	0	0	0	0	0	0	0	0	0	0	0	6	0	0	0	0	0	0	0	0	0	0	0	0	0	0	0	0		YNG1	YEASTProtein YNG1 OS=Saccharomyces cerevisiae (strain ATCC 204508 / S288c) OX=559292 GN=YNG1 PE=1 SV=1
TRINITY_DN80939_c0_g1_i1	0	1	0	0	0	0	0	0	0	0	0	0	0	1	0	0	0	0	0	0	0	0	0	0	0	0	0	0	0	0	0		YNFF	ECOLIProbable dimethyl sulfoxide reductase chain YnfF OS=Escherichia coli (strain K12) OX=83333 GN=ynfF PE=1 SV=4
TRINITY_DN44736_c0_g3_i3	0	0	0	0	0	0	0	0	0	0	0	0	0	0	0	0	0	0	0	1	0	1	0	0	0	0	0	0	1	0	0		YNF8	RHIMLUncharacterized protein ORF8 in nfe locus (Fragment) OS=Rhizobium meliloti OX=382 PE=4 SV=1
TRINITY_DN44736_c0_g3_i1	2	1	0	0.5	4	6	10.3	3	3	0	0	2	0	3	0	1	2	0	1	2.67	0.5	7.71	3	0	1.5	4	0	0	1	0	0		YNF8	RHIMLUncharacterized protein ORF8 in nfe locus (Fragment) OS=Rhizobium meliloti OX=382 PE=4 SV=1
TRINITY_DN44736_c0_g3_i2	0	0	0	0.5	0	0	7.7	0	0	0	0	0	0	0	0	0	0	0	1	1.33	0.5	1.29	2	0	1.5	0	0	0	1	0	0		YNF8	RHIMLUncharacterized protein ORF8 in nfe locus (Fragment) OS=Rhizobium meliloti OX=382 PE=4 SV=1
TRINITY_DN16175_c0_g1_i9	0	0	3.33	0	0	0	0	0	0.06	0	0	0	0	0	0	0	0	1	1.37	0	0	0	0	0	0	1	0	0	0	0.8	1.35		YNC2	CAEELLIMR family protein R05D3.2 OS=Caenorhabditis elegans OX=6239 GN=R05D3.2 PE=3 SV=1
TRINITY_DN127259_c0_g1_i1	0	0	0	0	0	0	0	0	0	1	0	0	0	0	0	0	0	0	0	0	0	0	0	0	0	0	0	0	0	0	0		YN93	YEASTUncharacterized hydrolase YNR064C OS=Saccharomyces cerevisiae (strain ATCC 204508 / S288c) OX=559292 GN=YNR064C PE=3 SV=1
TRINITY_DN126293_c0_g1_i1	0	0	0	0	0	0	0	0	0	0	0	0	0	0	4	0	0	0	0	0	0	0	0	0	0	0	0	0	0	0	0		YMY9	YEASTGlucose-6-phosphate 1-epimerase OS=Saccharomyces cerevisiae (strain ATCC 204508 / S288c) OX=559292 GN=YMR099C PE=1 SV=1
TRINITY_DN55345_c0_g1_i1	0	0	0	0	0	0	0	0	0	0	0	0	0	0	0	0	0	0	1	0	0	1	3	1	0	0	0	0	0	0	0		YMXG	BACSUUncharacterized zinc protease YmxG OS=Bacillus subtilis (strain 168) OX=224308 GN=ymxG PE=3 SV=3
TRINITY_DN113746_c0_g1_i1	0	0	0	0	0	0	0	0	0	0	0	0	0	0	0	0	0	0	0	0	0	0	0	2	0	0	0	0	0	0	0		YMS5	CAEELUncharacterized protein K03H1.5 OS=Caenorhabditis elegans OX=6239 GN=K03H1.5 PE=1 SV=2
TRINITY_DN15396_c0_g1_i1	0	2	12	78	146	0	0	0	0	3	465	2	0	517	0	4	102	291	0	66	0	40	8	9	4	9	1	32	0	0	0		YMN3	PODANUncharacterized 49.1 kDa protein in ND3 intron OS=Podospora anserina (strain S / ATCC MYA-4624 / DSM 980 / FGSC 10383) OX=515849 PE=1 SV=1
TRINITY_DN24495_c0_g1_i1	0	0	1	3	6	0	0	0	0	0	25	0	0	28	0	0	6	1	0	2	1	0	1	0	0	0	0	2	0	0	0		YMN3	PODANUncharacterized 49.1 kDa protein in ND3 intron OS=Podospora anserina (strain S / ATCC MYA-4624 / DSM 980 / FGSC 10383) OX=515849 PE=1 SV=1
TRINITY_DN30734_c0_g1_i1	2	3	12	8	2	4	5	3	3	3	5	1	10	2	0	7	3	1	12	5	5	5	8	7	2	5	13	5	5	0	0		YMH9	YEASTUncharacterized protein YML079W OS=Saccharomyces cerevisiae (strain ATCC 204508 / S288c) OX=559292 GN=YML079W PE=1 SV=1
TRINITY_DN89428_c0_g1_i1	1	0	1	12	31	0	0	0	0	0	168	5	0	139	0	0	14	8	0	5	0	9	1	4	1	3	0	11	0	0	0		YMF40	MARPOUncharacterized mitochondrial protein ymf40 OS=Marchantia polymorpha OX=3197 GN=YMF40 PE=4 SV=1
TRINITY_DN95848_c0_g1_i1	0	0	0	0	0	0	0	0	0	1	4	0	0	0	0	0	0	0	0	0	0	0	0	0	0	0	0	0	0	0	0		YMF40	MARPOUncharacterized mitochondrial protein ymf40 OS=Marchantia polymorpha OX=3197 GN=YMF40 PE=4 SV=1
TRINITY_DN62786_c0_g1_i1	1	0	0	0	0	0	0	1	0	0	10	0	0	1	1	0	0	0	0	0	0	0	0	0	0	0	0	0	0	0	0		YMF40	MARPOUncharacterized mitochondrial protein ymf40 OS=Marchantia polymorpha OX=3197 GN=YMF40 PE=4 SV=1
TRINITY_DN34365_c1_g2_i1	0	0	1	1	2	0	0	0	0	1	24	0	0	20	0	0	0	0	0	2	0	0	1	0	0	0	0	1	0	0	0		YMF40	MARPOUncharacterized mitochondrial protein ymf40 OS=Marchantia polymorpha OX=3197 GN=YMF40 PE=4 SV=1
TRINITY_DN122802_c0_g1_i1	0	0	0	4	0	0	0	0	0	0	0	0	0	1	0	0	0	0	0	0	0	0	0	0	0	0	0	0	0	0	0		YMF40	MARPOUncharacterized mitochondrial protein ymf40 OS=Marchantia polymorpha OX=3197 GN=YMF40 PE=4 SV=1
TRINITY_DN4526_c0_g1_i2	0	0	0	0	0	0	0	0	0	0	31.71	0	0	12.1	0	0	0	0	0	0	0	0	0	0	0	0	0	0	0	0	0		YMF19	MARPOPutative ATP synthase protein YMF19 OS=Marchantia polymorpha OX=3197 GN=YMF19 PE=3 SV=1
TRINITY_DN4526_c0_g1_i4	0	0	0	6.49	4.66	0	0	0	0	1	22.69	0	0	33.59	0	0	0	0	0	2.32	0	0	0	0	0	0	0	0	0	0	0		YMF19	MARPOPutative ATP synthase protein YMF19 OS=Marchantia polymorpha OX=3197 GN=YMF19 PE=3 SV=1
TRINITY_DN95166_c0_g1_i1	0	0	0	0	0	0	0	0	0	0	5	0	0	1	0	0	0	0	0	0	0	0	0	0	0	0	0	0	0	0	0		YMF16	RECAMUncharacterized tatC-like protein ymf16 OS=Reclinomonas americana OX=48483 GN=YMF16 PE=3 SV=1
TRINITY_DN136067_c0_g1_i1	0	0	0	0	0	1	0	1	0	0	0	0	0	0	0	1	0	0	1	1	1	0	0	0	0	0	0	0	1	0	0		YMF16	NEPOLUncharacterized tatC-like protein ymf16 OS=Nephroselmis olivacea OX=31312 GN=YMF16 PE=3 SV=1
TRINITY_DN80473_c0_g1_i1	0	0	0	0	1	0	0	1	0	0	0	0	0	1	0	2	0	0	2	2	0	0	0	0	0	0	0	0	0	0	0		YMF16	NEPOLUncharacterized tatC-like protein ymf16 OS=Nephroselmis olivacea OX=31312 GN=YMF16 PE=3 SV=1
TRINITY_DN76168_c0_g1_i1	0	1	1	0	0	0	0	0	0	0	0	0	0	0	0	0	0	0	0	0	0	0	0	0	0	0	0	0	0	0	0		YMES	GEOSEUncharacterized metal-dependent hydrolase in metS 3'region (Fragment) OS=Geobacillus stearothermophilus OX=1422 PE=3 SV=1
TRINITY_DN34908_c0_g1_i2	0	0	0	0	0	0	0	0	0	0	0	0	0	0	9	0	0	0	0	0	0	0	0	0	0	0	0	0	0	0	0		YMEL1	MOUSEATP-dependent zinc metalloprotease YME1L1 OS=Mus musculus OX=10090 GN=Yme1l1 PE=1 SV=1
TRINITY_DN2345_c0_g2_i12	72.01	60.05	147.85	109.77	80.76	88.3	99.34	82.92	42.79	40.53	92.73	111.96	319.46	167.28	4.3	152.8	74.44	24.93	127.47	99.4	119	135.41	170.8	101.85	73.06	99.17	103.06	100.5	66.19	31.85	55.64		YMEL1	MOUSEATP-dependent zinc metalloprotease YME1L1 OS=Mus musculus OX=10090 GN=Yme1l1 PE=1 SV=1
TRINITY_DN100269_c0_g1_i1	1	0	0	1	0	0	1	0	0	0	0	0	0	1	0	0	0	0	0	0	0	0	0	0	0	0	1	0	1	1	1		YMEL1	MOUSEATP-dependent zinc metalloprotease YME1L1 OS=Mus musculus OX=10090 GN=Yme1l1 PE=1 SV=1
TRINITY_DN2345_c0_g2_i1	0	11.72	25.98	11.81	6.93	17.17	0	0	60.88	25.22	0	0	0	91.73	0	7.55	0	0	10.85	0	21.28	10.62	11.12	25.02	6.49	0	6.77	7.5	25.35	30.68	24.18		YMEL1	MOUSEATP-dependent zinc metalloprotease YME1L1 OS=Mus musculus OX=10090 GN=Yme1l1 PE=1 SV=1
TRINITY_DN90930_c0_g1_i1	0	0	0	0	0	0	0	0	0	0	0	0	0	0	11	0	0	0	0	0	0	0	0	0	0	0	0	0	0	0	0		YMEL1	MOUSEATP-dependent zinc metalloprotease YME1L1 OS=Mus musculus OX=10090 GN=Yme1l1 PE=1 SV=1
TRINITY_DN95093_c0_g1_i1	0	0	0	0	0	0	0	0	0	0	0	0	0	0	2	0	0	0	0	0	0	0	0	0	0	0	0	0	0	0	0		YMDB	ESCF3O-acetyl-ADP-ribose deacetylase OS=Escherichia fergusonii (strain ATCC 35469 / DSM 13698 / CDC 0568-73) OX=585054 GN=ymdB PE=3 SV=2
TRINITY_DN74658_c0_g1_i1	0	0	0	0	0	0	0	0	0	0	0	0	0	0	15	0	0	0	0	0	0	0	0	0	0	0	0	0	0	0	0		YMDB	CROS8O-acetyl-ADP-ribose deacetylase OS=Cronobacter sakazakii (strain ATCC BAA-894) OX=290339 GN=ymdB PE=3 SV=1
TRINITY_DN95796_c0_g1_i1	0	0	0	1	2	0	0	0	0	0	0	0	0	0	0	0	0	0	0	0	0	0	0	0	0	0	0	0	0	0	0		YMDB	BACSU2',3'-cyclic-nucleotide 2'-phosphodiesterase OS=Bacillus subtilis (strain 168) OX=224308 GN=ymdB PE=1 SV=2
TRINITY_DN69832_c0_g1_i1	0	0	0	2	0	1	0	0	0	0	0	0	0	0	0	0	0	0	0	0	0	0	0	0	0	0	0	0	0	0	0		YMC6	SCHPOUncharacterized 91 kDa protein in cob intron OS=Schizosaccharomyces pombe (strain 972 / ATCC 24843) OX=284812 GN=SPMIT.06 PE=4 SV=4
TRINITY_DN84290_c0_g1_i1	0	0	0	0	0	1	0	0	0	0	0	0	0	0	0	0	0	0	0	0	0	0	0	0	1	0	0	0	0	0	0		YMC6	SCHPOUncharacterized 91 kDa protein in cob intron OS=Schizosaccharomyces pombe (strain 972 / ATCC 24843) OX=284812 GN=SPMIT.06 PE=4 SV=4
TRINITY_DN4526_c1_g1_i9	0	0	0	3	7.11	0	0	0	0	0	80.58	2	0	40.32	0	0	2.76	0	0	0	0	0	0	0	0	0	0	0	0	0	0		YMC6	SCHPOUncharacterized 91 kDa protein in cob intron OS=Schizosaccharomyces pombe (strain 972 / ATCC 24843) OX=284812 GN=SPMIT.06 PE=4 SV=4
TRINITY_DN50494_c0_g2_i1	0	0	0	0	0	0	0	0	0	0	4	0	0	0	0	0	0	0	0	0	0	0	1	1	0	0	0	0	0	0	0		YMC6	SCHPOUncharacterized 91 kDa protein in cob intron OS=Schizosaccharomyces pombe (strain 972 / ATCC 24843) OX=284812 GN=SPMIT.06 PE=4 SV=4
TRINITY_DN92178_c0_g1_i1	0	0	0	0	1	0	0	0	0	0	0	0	0	2	0	0	0	0	0	0	0	0	0	0	0	0	0	0	0	0	0		YMC6	SCHPOUncharacterized 91 kDa protein in cob intron OS=Schizosaccharomyces pombe (strain 972 / ATCC 24843) OX=284812 GN=SPMIT.06 PE=4 SV=4
TRINITY_DN69188_c0_g1_i1	0	0	0	0	0	0	0	0	0	0	0	0	0	0	0	1	0	0	0	0	0	0	0	0	0	0	0	0	0	0	0		YMC6	SCHPOUncharacterized 91 kDa protein in cob intron OS=Schizosaccharomyces pombe (strain 972 / ATCC 24843) OX=284812 GN=SPMIT.06 PE=4 SV=4
TRINITY_DN139531_c0_g1_i1	0	0	0	0	1	0	0	0	0	0	9	0	0	2	0	0	1	0	0	1	0	0	0	0	0	0	0	0	0	0	0		YMC6	SCHPOUncharacterized 91 kDa protein in cob intron OS=Schizosaccharomyces pombe (strain 972 / ATCC 24843) OX=284812 GN=SPMIT.06 PE=4 SV=4
TRINITY_DN119105_c0_g1_i1	0	0	0	0	2	0	0	0	0	0	26	0	0	10	0	0	0	0	0	2	0	0	0	0	0	0	0	0	0	0	0		YMC6	SCHPOUncharacterized 91 kDa protein in cob intron OS=Schizosaccharomyces pombe (strain 972 / ATCC 24843) OX=284812 GN=SPMIT.06 PE=4 SV=4
TRINITY_DN34365_c1_g3_i1	0	0	0	0	0	0	0	0	0	0	10	0	0	3	0	0	0	0	0	0	0	0	0	0	0	0	0	0	0	0	0		YMC6	SCHPOUncharacterized 91 kDa protein in cob intron OS=Schizosaccharomyces pombe (strain 972 / ATCC 24843) OX=284812 GN=SPMIT.06 PE=4 SV=4
TRINITY_DN67423_c0_g1_i1	0	0	0	0	0	0	0	0	0	0	1	0	0	0	0	0	0	0	0	0	0	0	0	0	0	0	0	0	0	0	0		YMC6	SCHPOUncharacterized 91 kDa protein in cob intron OS=Schizosaccharomyces pombe (strain 972 / ATCC 24843) OX=284812 GN=SPMIT.06 PE=4 SV=4
TRINITY_DN39380_c0_g1_i1	0	1	0	2	0	1	0	0	0	0	0	0	0	0	0	0	0	0	3	0	0	0	0	0	0	0	0	0	0	0	0		YMC6	SCHPOUncharacterized 91 kDa protein in cob intron OS=Schizosaccharomyces pombe (strain 972 / ATCC 24843) OX=284812 GN=SPMIT.06 PE=4 SV=4
TRINITY_DN44898_c0_g1_i1	0	0	0	0	0	0	0	0	0	0	0	0	0	0	14	0	0	0	0	0	0	0	0	0	0	0	0	0	0	0	0		YMC1	YEASTMitochondrial glycine transporter YMC1 OS=Saccharomyces cerevisiae (strain ATCC 204508 / S288c) OX=559292 GN=YMC1 PE=1 SV=2
TRINITY_DN53124_c0_g1_i2	0	0	0	12	28	0	0	0	0	0	132	0	0	86	1	0	5	5	0	9	0	0	0	0	0	0	0	4	0	0	0		YM79	YEASTUncharacterized protein YMR244W OS=Saccharomyces cerevisiae (strain ATCC 204508 / S288c) OX=559292 GN=YMR244W PE=3 SV=1
TRINITY_DN118417_c0_g1_i1	0	0	0	0	0	0	0	0	0	0	0	0	0	0	30	0	0	0	0	0	0	0	0	0	0	0	0	0	0	0	0		YM67	CAEELPutative serine protease K12H4.7 OS=Caenorhabditis elegans OX=6239 GN=K12H4.7 PE=3 SV=2
TRINITY_DN134527_c0_g1_i1	0	0	0	0	0	0	0	0	0	0	0	0	0	0	2	0	0	0	0	0	0	0	0	0	0	0	0	0	0	0	0		YM60	YEASTPutative esterase YMR210W OS=Saccharomyces cerevisiae (strain ATCC 204508 / S288c) OX=559292 GN=YMR210W PE=1 SV=1
TRINITY_DN2272_c1_g1_i1	0	0	0	0	0	0	0	0	0	0	0	0	0	0	54	0	0	0	0	0	0	0	0	0	0	0	0	0	0	0	0		YM54	YEASTUncharacterized protein YMR196W OS=Saccharomyces cerevisiae (strain ATCC 204508 / S288c) OX=559292 GN=YMR196W PE=1 SV=1
TRINITY_DN2272_c0_g1_i1	9.68	0	24.07	8.56	10.72	0	0	0	9.44	8.1	0	0	0	9.44	0	0	0	0	0	0	0	0	0	0	16.44	0	0	15.16	0	0	6.94		YM54	YEASTUncharacterized protein YMR196W OS=Saccharomyces cerevisiae (strain ATCC 204508 / S288c) OX=559292 GN=YMR196W PE=1 SV=1
TRINITY_DN90084_c0_g1_i2	0	0	0	0	0	0	0	0	0	0	0	0	0	0	51.65	0	0	0	0	0	0	0	0	0	0	0	0	0	0	0	0		YM54	YEASTUncharacterized protein YMR196W OS=Saccharomyces cerevisiae (strain ATCC 204508 / S288c) OX=559292 GN=YMR196W PE=1 SV=1
TRINITY_DN2272_c0_g1_i2	201.32	253	303.93	279.44	204.28	198	222	235	206.56	210.9	193	151	325	228.56	7	279	119	47	243	230	104	277	238	268	187.56	191	212	249.84	153	48	75.06		YM54	YEASTUncharacterized protein YMR196W OS=Saccharomyces cerevisiae (strain ATCC 204508 / S288c) OX=559292 GN=YMR196W PE=1 SV=1
TRINITY_DN90084_c0_g1_i1	0	0	0	0	0	0	0	0	0	0	0	0	0	0	41.35	0	0	0	0	0	0	0	0	0	0	0	0	0	0	0	0		YM54	YEASTUncharacterized protein YMR196W OS=Saccharomyces cerevisiae (strain ATCC 204508 / S288c) OX=559292 GN=YMR196W PE=1 SV=1
TRINITY_DN123199_c0_g1_i1	0	0	0	0	0	0	0	0	0	0	1	0	0	0	0	0	0	1	0	0	0	0	0	0	0	0	0	0	0	0	0		YLWD	SCHPOUncharacterized protein P8A3.13c OS=Schizosaccharomyces pombe (strain 972 / ATCC 24843) OX=284812 GN=SPAP8A3.13c PE=4 SV=1
TRINITY_DN2377_c0_g1_i84	1	0	1	0	0	2	1	3	0	1	0	0	2	0	0	0	0	0	0	0	0	0	0	0	0	1	0	0	0	0	3.69		YLPM1	RATYLP motif-containing protein 1 OS=Rattus norvegicus OX=10116 GN=Ylpm1 PE=1 SV=1
TRINITY_DN2377_c0_g1_i32	0	0	3.06	0	0	2.68	0	2.13	2.15	2.52	0	5.39	19.73	10.58	0	0	0	1.7	0	1.99	9.28	1.91	12.29	4.72	7.66	4.46	6.14	0	2.24	6.8	4.58		YLPM1	RATYLP motif-containing protein 1 OS=Rattus norvegicus OX=10116 GN=Ylpm1 PE=1 SV=1
TRINITY_DN79810_c0_g1_i1	0	0	0	0	0	0	0	0	0	0	0	0	0	0	5	0	0	0	0	0	0	0	0	0	0	0	0	0	0	0	0		YLPM1	RATYLP motif-containing protein 1 OS=Rattus norvegicus OX=10116 GN=Ylpm1 PE=1 SV=1
TRINITY_DN2377_c0_g1_i36	6.62	0	0	5.65	0	0	0	0	0	11.8	0	0	12.33	0	0	0	0	0	0	8.57	11.16	0	0	0	0	2.55	0	0	8.85	0	0		YLPM1	HUMANYLP motif-containing protein 1 OS=Homo sapiens OX=9606 GN=YLPM1 PE=1 SV=4
TRINITY_DN2377_c0_g1_i5	0	0	0	0	3.37	0	0	0	0	1.95	0	0	0	0	0	6.37	0	0	0	0	0	0	4.32	4.42	0	0	0	0	4.47	0	3.2		YLPM1	HUMANYLP motif-containing protein 1 OS=Homo sapiens OX=9606 GN=YLPM1 PE=1 SV=4
TRINITY_DN9648_c7_g1_i1	0	0	0	0	0	1	0	0	0	0	0	0	0	0	0	0	0	0	0	0	0	0	0	0	0	0	0	0	0	0	0		YLPM1	HUMANYLP motif-containing protein 1 OS=Homo sapiens OX=9606 GN=YLPM1 PE=1 SV=4
TRINITY_DN2377_c0_g1_i61	0	4.29	8.93	0	2.77	0	3.26	0	0	4.77	10.19	0	18.36	0	1.92	6.19	0	0	4.51	8.98	0	8.89	3.79	4.3	0	9.43	21.42	0	6.76	0	0		YLPM1	HUMANYLP motif-containing protein 1 OS=Homo sapiens OX=9606 GN=YLPM1 PE=1 SV=4
TRINITY_DN2377_c0_g1_i104	3.84	6.45	0	0.92	9.15	0	9.6	0	2.71	0	1.41	0	3.42	7.22	0	18.44	7.08	0	17.44	0	0	11.69	13.51	11.34	21.96	9.21	0	26	0	10.08	0		YLPM1	HUMANYLP motif-containing protein 1 OS=Homo sapiens OX=9606 GN=YLPM1 PE=1 SV=4
TRINITY_DN2377_c0_g1_i16	8.36	0	9.27	11.4	0	14.9	2.14	12.87	11.31	0	0	7.87	10.99	6.86	0	0	3.07	4.3	10.33	0	0	0.71	9.09	0	8.38	6.57	0	0	0	0	9.19		YLPM1	HUMANYLP motif-containing protein 1 OS=Homo sapiens OX=9606 GN=YLPM1 PE=1 SV=4
TRINITY_DN53568_c0_g1_i1	0	0	0	0	0	0	0	0	0	0	0	0	0	0	4	0	0	0	0	0	0	0	0	0	0	0	0	0	0	0	0		YLPM1	HUMANYLP motif-containing protein 1 OS=Homo sapiens OX=9606 GN=YLPM1 PE=1 SV=4
TRINITY_DN2377_c0_g1_i26	3.18	3.26	0	3.03	0	1.42	0	0	5.95	0	5.2	0	0	2.67	0	0	0	0	0	0	0	0	0	2.63	0	0	4.06	0	0	2.12	0		YLPM1	HUMANYLP motif-containing protein 1 OS=Homo sapiens OX=9606 GN=YLPM1 PE=1 SV=4
TRINITY_DN97925_c0_g1_i1	0	2	1	0	0	0	0	1	0	0	0	0	0	0	0	0	0	0	0	0	0	0	0	0	0	0	0	0	0	0	0		YLOC	BACSUUPF0701 protein YloC OS=Bacillus subtilis (strain 168) OX=224308 GN=yloC PE=3 SV=1
TRINITY_DN70778_c0_g1_i1	0	0	0	0	0	0	0	0	0	0	0	1	0	0	0	0	0	0	0	0	0	0	0	0	0	0	0	0	0	0	0		YLII	ECOLIAldose sugar dehydrogenase YliI OS=Escherichia coli (strain K12) OX=83333 GN=yliI PE=1 SV=1
TRINITY_DN95143_c0_g1_i1	0	0	0	0	0	0	0	0	0	0	0	0	0	0	0	0	0	0	1	0	1	0	0	0	0	0	0	0	0	0	0		YLBH	BACSUPutative rRNA methyltransferase YlbH OS=Bacillus subtilis (strain 168) OX=224308 GN=ylbH PE=3 SV=2
TRINITY_DN132639_c0_g1_i1	0	0	0	0	0	0	0	0	0	2	0	0	0	0	0	0	0	0	0	0	0	0	0	0	0	0	0	0	0	0	0		YLAT2	XENLAY+L amino acid transporter 2 OS=Xenopus laevis OX=8355 GN=slc7a6 PE=2 SV=1
TRINITY_DN4194_c0_g1_i98	0	1.37	0	0	1	1	1	0	0	2	0	2.25	0	0	0	0	0	0	0	0	0	0	0	0	0	0	0	0	0	0.36	0		YLAT1	HUMANY+L amino acid transporter 1 OS=Homo sapiens OX=9606 GN=SLC7A7 PE=1 SV=2
TRINITY_DN55288_c0_g1_i1	0	0	0	0	0	0	0	1	0	0	0	0	0	0	0	0	0	2	0	0	0	0	0	0	0	0	0	0	0	0	0		YLAK	BACSUUncharacterized protein YlaK OS=Bacillus subtilis (strain 168) OX=224308 GN=ylaK PE=3 SV=1
TRINITY_DN25596_c0_g1_i1	0	1	0	0	0	0	0	3	0	0	0	0	0	0	0	2	0	0	0	0	2	0	0	0	0	3	0	0	0	0	0		YL673	MIMIVPutative serine/threonine-protein kinase L673 OS=Acanthamoeba polyphaga mimivirus OX=212035 GN=MIMI	L673 PE=3 SV=1
TRINITY_DN73954_c0_g1_i1	0	0	0	0	0	0	0	0	0	0	0	0	0	0	3	0	0	0	0	0	0	0	0	0	0	0	0	0	0	0	0		YL670	MIMIVPutative serine/threonine-protein kinase L670 OS=Acanthamoeba polyphaga mimivirus OX=212035 GN=MIMI	L670 PE=3 SV=1
TRINITY_DN49491_c0_g1_i3	0	0	0	4	0	1	22	0	0	4	2.49	7	9	3	0	7.64	5.76	4	4.11	9.05	0	5.79	6	10.15	5.81	0	4.78	10	7	2	4		YL662	MIMIVUncharacterized protein L662 OS=Acanthamoeba polyphaga mimivirus OX=212035 GN=MIMI	L662 PE=4 SV=1
TRINITY_DN49491_c0_g1_i1	0	0	0	0	0	0	0	0	0	0	0.51	0	0	0	0	0	0	0	22.89	2.95	0	0	0	0	0	0	0	0	0	0	0		YL662	MIMIVUncharacterized protein L662 OS=Acanthamoeba polyphaga mimivirus OX=212035 GN=MIMI	L662 PE=4 SV=1
TRINITY_DN49491_c0_g1_i2	5	0	1	0	3	0	0	0	2	0	0	0	0	0	0	9.36	5.24	0	0	0	4	1.21	0	7.85	0.19	0	10.22	0	0	0	0		YL662	MIMIVUncharacterized protein L662 OS=Acanthamoeba polyphaga mimivirus OX=212035 GN=MIMI	L662 PE=4 SV=1
TRINITY_DN92032_c0_g1_i1	0	0	0	1	0	1	2	1	0	0	0	1	0	0	0	0	0	0	0	0	0	0	0	0	0	0	0	0	0	0	0		YL233	MIMIVPutative zinc protease L233 OS=Acanthamoeba polyphaga mimivirus OX=212035 GN=MIMI	L233 PE=3 SV=1
TRINITY_DN119393_c0_g1_i1	0	0	0	0	0	0	0	0	0	0	0	0	0	0	7	0	0	0	0	0	0	0	0	0	0	0	0	0	0	0	0		YL092	MIMIVPutative ankyrin repeat protein L92 OS=Acanthamoeba polyphaga mimivirus OX=212035 GN=MIMI	L92 PE=4 SV=1
TRINITY_DN347_c1_g1_i2	0	0	0	1	0	0	0	0	1	0	0	0	1	1	0	0	0	0	0	1	0	0	0	0	0	0	0	0	0	0	0		YL	DROMEPutative vitellogenin receptor OS=Drosophila melanogaster OX=7227 GN=yl PE=1 SV=2
TRINITY_DN46318_c0_g1_i3	0	0	0	0	0	0	0	0	2	0	0	0	0	0	0	0	0	0	0	0	0	0	0	0	0	0	0	0	0	0	0		YL	DROMEPutative vitellogenin receptor OS=Drosophila melanogaster OX=7227 GN=yl PE=1 SV=2
TRINITY_DN46318_c0_g1_i7	0	0	0	0	0	0	0	0	0	0	0	0	0	0	0	0	0	0	0	0	0	0	1	0	0	0	0	0	0	0	0		YL	DROMEPutative vitellogenin receptor OS=Drosophila melanogaster OX=7227 GN=yl PE=1 SV=2
TRINITY_DN10752_c0_g1_i4	0	1.22	3.19	1.55	2.04	2.24	2.79	2	3.88	1	0	2	30.08	4.65	0	1	1	2	0	2.62	1	3	3.19	3.47	2	2.64	1.33	0	1	0	0		YL	DROMEPutative vitellogenin receptor OS=Drosophila melanogaster OX=7227 GN=yl PE=1 SV=2
TRINITY_DN46318_c0_g1_i4	0	0	3	0	0	0	1.71	0	0	1.86	2	0.97	0	0	0	3.98	0	0	0	0	3.52	3	2.09	0	0	12.01	1	6	1	0	0		YL	DROMEPutative vitellogenin receptor OS=Drosophila melanogaster OX=7227 GN=yl PE=1 SV=2
TRINITY_DN347_c1_g1_i1	0	0	0	0	0	0	2	0	0	0	0	0	0	0	0	0	0	0	0	0	0	0	0	0	0	0	0	0	0	0	0		YL	DROMEPutative vitellogenin receptor OS=Drosophila melanogaster OX=7227 GN=yl PE=1 SV=2
TRINITY_DN52863_c0_g2_i1	0	0	0	0	0	0	0	0	0	0	0	0	0	0	0	0	0	0	0	0	0	0	0	0	0	4	0	0	0	0	0		YL	DROMEPutative vitellogenin receptor OS=Drosophila melanogaster OX=7227 GN=yl PE=1 SV=2
TRINITY_DN123_c0_g1_i128	12.7	5.1	8.15	13.61	8.03	4.92	3.14	0	0	8.07	0	0	11.61	0	0	0	0	0	0	0	0	0	0	10	6	17.1	0	0	0	123.83	251.89		YL	DROMEPutative vitellogenin receptor OS=Drosophila melanogaster OX=7227 GN=yl PE=1 SV=2
TRINITY_DN43129_c0_g1_i3	0	0	0	0	1	0	0	0	0	0	0	1	0	0	0	0	0	0	0	4	0	3	0	0	2	0	0	0	0	0	0		YL	DROMEPutative vitellogenin receptor OS=Drosophila melanogaster OX=7227 GN=yl PE=1 SV=2
TRINITY_DN46318_c0_g1_i1	0	1	0	0	0	0	0	1	1	0	1	0	1	0	0	4.96	0	0	0	0	0	0	1	0	0	1	4	1	0	0	0		YL	DROMEPutative vitellogenin receptor OS=Drosophila melanogaster OX=7227 GN=yl PE=1 SV=2
TRINITY_DN14658_c0_g1_i1	0	0	0	0	0	0	0	0	0	0	0	0	0	0	10.31	0	0	0	0	0	0	0	0	0	0	0	0	0	0	0	0		YL	DROMEPutative vitellogenin receptor OS=Drosophila melanogaster OX=7227 GN=yl PE=1 SV=2
TRINITY_DN52863_c0_g1_i3	0	0	0	0	0	0	0	0	0	0	0	0	0	0	0	0	0	0	0	0	0	0	0	0	0	0	0	0	0	0	0		YL	DROMEPutative vitellogenin receptor OS=Drosophila melanogaster OX=7227 GN=yl PE=1 SV=2
TRINITY_DN130305_c0_g1_i1	0	0	0	1	1	0	0	0	0	0	0	0	0	0	0	0	0	0	0	0	0	0	0	0	0	0	0	0	0	0	0		YKX5	SCHPOUncharacterized RNA-binding protein C328.05 OS=Schizosaccharomyces pombe (strain 972 / ATCC 24843) OX=284812 GN=SPAC328.05 PE=4 SV=3
TRINITY_DN33227_c0_g1_i1	0	0	0	4	12	0	0	0	0	0	25	2	0	13	0	0	1	0	0	1	0	0	0	0	0	0	0	0	0	0	0		YKWD	BACSUUncharacterized protein YkwD OS=Bacillus subtilis (strain 168) OX=224308 GN=ykwD PE=3 SV=1
TRINITY_DN37525_c0_g1_i1	0	0	1	3	7	0	0	0	0	0	27	1	0	11	0	0	4	0	0	1	0	1	0	0	0	0	0	1	0	0	0		YKWD	BACSUUncharacterized protein YkwD OS=Bacillus subtilis (strain 168) OX=224308 GN=ykwD PE=3 SV=1
TRINITY_DN61191_c0_g1_i1	0	1	0	1	0	0	0	0	0	0	2	0	0	0	0	0	0	1	0	0	0	0	0	0	0	0	0	1	1	0	0		YKVT	BACSUUncharacterized protein YkvT OS=Bacillus subtilis (strain 168) OX=224308 GN=ykvT PE=2 SV=1
TRINITY_DN128977_c0_g1_i1	0	0	0	0	0	0	0	0	0	0	0	0	0	0	1	4	0	0	2	0	0	0	0	0	0	0	0	0	0	0	0		YKUD	BACSKPutative L,D-transpeptidase YkuD OS=Bacillus clausii (strain KSM-K16) OX=66692 GN=ABC3535 PE=3 SV=1
TRINITY_DN20336_c0_g1_i13	0	0	0	0	0	1	0	0	0	0	0	0	0	0	0	1.2	0	0	0	0	0	0	0	0	0	0	0	1	0	0	0		YKU5	SCHPOUncharacterized WD repeat-containing protein C2E1P5.05 OS=Schizosaccharomyces pombe (strain 972 / ATCC 24843) OX=284812 GN=SPAC2E1P5.05 PE=4 SV=1
TRINITY_DN22644_c0_g1_i1	0	0	0	0	0	0	0	0	0	0	0	0	0	0	7	0	0	0	0	0	0	0	0	0	0	0	0	0	0	0	0		YKT6	YARLISynaptobrevin homolog YKT6 OS=Yarrowia lipolytica (strain CLIB 122 / E 150) OX=284591 GN=YKT6 PE=3 SV=1
TRINITY_DN22644_c0_g2_i2	0	0	0	0	0	0	0	0	0	0	0	0	0	0	3	0	0	0	0	0	0	0	0	0	0	0	0	0	0	0	0		YKT6	RATSynaptobrevin homolog YKT6 OS=Rattus norvegicus OX=10116 GN=Ykt6 PE=1 SV=1
TRINITY_DN22644_c0_g2_i1	0	0	0	0	0	0	0	0	0	0	0	0	0	0	1	0	0	0	0	0	0	0	0	0	0	0	0	0	0	0	0		YKT6	RATSynaptobrevin homolog YKT6 OS=Rattus norvegicus OX=10116 GN=Ykt6 PE=1 SV=1
TRINITY_DN13199_c0_g1_i4	1.82	2.7	0	5.49	0	0	1.35	0	0	0	0	0	0	0	0	0	0	0	0	0	0	0	0	0	0	1.65	2.88	0	0	0	0		YKT6	HUMANSynaptobrevin homolog YKT6 OS=Homo sapiens OX=9606 GN=YKT6 PE=1 SV=1
TRINITY_DN13199_c0_g1_i10	0	0	0	0	0	1.72	0	3	0	0	0	1.55	0	3.06	0	0	0	0	0	0	0	0	1.51	0	0	0	0	0	0	1.2	0		YKT6	HUMANSynaptobrevin homolog YKT6 OS=Homo sapiens OX=9606 GN=YKT6 PE=1 SV=1
TRINITY_DN13199_c0_g1_i8	1.55	1.65	0	0	0	0	0	0	1.99	0	0	0	0	0	0	0	0	0	3.55	0	0	0	0	0	0	0	0	0	0	0	0		YKT6	HUMANSynaptobrevin homolog YKT6 OS=Homo sapiens OX=9606 GN=YKT6 PE=1 SV=1
TRINITY_DN13199_c0_g1_i21	0	0	0	3.52	0	0	0	0	0	0	0	0	0	0	0	0	0	0	0	0	0	0	0	0	0	0	0	0	0	0	0		YKT6	HUMANSynaptobrevin homolog YKT6 OS=Homo sapiens OX=9606 GN=YKT6 PE=1 SV=1
TRINITY_DN13199_c0_g1_i15	0	0	0	0	0	0	0	2.04	0	0	0	0	0	0	0	0	0	0	0	0	0	0	0	0	0	0	0	0	0	0	0		YKT6	HUMANSynaptobrevin homolog YKT6 OS=Homo sapiens OX=9606 GN=YKT6 PE=1 SV=1
TRINITY_DN13199_c0_g1_i26	0.54	0	1	0	0	0	0	0	0	1	0	0.86	0	0	0	1	0	0	2	0	0	0	0	0	0	0	1	0	0	0	0		YKT6	HUMANSynaptobrevin homolog YKT6 OS=Homo sapiens OX=9606 GN=YKT6 PE=1 SV=1
TRINITY_DN13199_c0_g1_i25	13.5	12.64	8.26	24	21.74	20.63	22.08	3.38	18.01	5.53	11	2.36	18.05	5.18	3	25	11.41	7	22.19	25.9	13.26	18.99	17.62	1.93	19.03	20.68	0	0	13.93	1.84	5.36		YKT6	HUMANSynaptobrevin homolog YKT6 OS=Homo sapiens OX=9606 GN=YKT6 PE=1 SV=1
TRINITY_DN13199_c0_g1_i5	5.6	0	14.74	0	0	4.65	0	5.58	0	11.47	0	3.75	5.95	5.76	0	0	17.59	0	22.26	3.63	5.74	13.39	5.24	43.94	4.97	9.66	14.12	24.18	8.74	0	4.64		YKT6	HUMANSynaptobrevin homolog YKT6 OS=Homo sapiens OX=9606 GN=YKT6 PE=1 SV=1
TRINITY_DN13199_c0_g1_i14	0	0	0	0	3.26	0	1.56	0	0	0	0	0.48	0	0	0	0	0	0	0	2.47	0	1.61	4.63	2.13	0	0	0	1.82	3.33	2.96	0		YKT6	BOVINSynaptobrevin homolog YKT6 OS=Bos taurus OX=9913 GN=YKT6 PE=2 SV=1
TRINITY_DN108106_c0_g1_i1	0	2	1	0	0	0	0	0	0	0	0	0	0	0	0	0	0	0	0	0	0	0	0	0	0	0	0	0	0	0	0		YKPA	BACSUUncharacterized ABC transporter ATP-binding protein YkpA OS=Bacillus subtilis (strain 168) OX=224308 GN=ykpA PE=3 SV=1
TRINITY_DN98013_c0_g1_i1	0	0	0	0	0	1	0	0	0	0	1	0	0	0	0	0	0	0	0	0	0	0	0	0	1	0	0	0	0	0	0		YKPA	BACSUUncharacterized ABC transporter ATP-binding protein YkpA OS=Bacillus subtilis (strain 168) OX=224308 GN=ykpA PE=3 SV=1
TRINITY_DN110637_c0_g1_i1	0	0	0	0	0	0	0	0	0	0	1	0	0	0	0	0	0	0	0	1	0	2	0	0	0	0	0	0	1	0	0		YKPA	BACSUUncharacterized ABC transporter ATP-binding protein YkpA OS=Bacillus subtilis (strain 168) OX=224308 GN=ykpA PE=3 SV=1
TRINITY_DN113313_c0_g1_i1	2	0	0	0	0	0	0	0	0	0	0	0	0	1	0	0	0	0	0	0	0	0	0	0	0	0	0	0	0	0	0		YKPA	BACSUUncharacterized ABC transporter ATP-binding protein YkpA OS=Bacillus subtilis (strain 168) OX=224308 GN=ykpA PE=3 SV=1
TRINITY_DN102643_c0_g1_i1	0	0	0	0	1	0	0	0	0	0	0	0	0	0	0	1	0	0	0	0	0	0	0	0	0	0	0	0	0	0	0		YKPA	BACSUUncharacterized ABC transporter ATP-binding protein YkpA OS=Bacillus subtilis (strain 168) OX=224308 GN=ykpA PE=3 SV=1
TRINITY_DN96009_c0_g1_i1	0	0	0	2	0	0	0	0	0	0	0	0	0	0	0	0	0	0	0	0	0	0	0	0	0	0	0	0	0	0	0		YKNY	BACSUUncharacterized ABC transporter ATP-binding protein YknY OS=Bacillus subtilis (strain 168) OX=224308 GN=yknY PE=1 SV=1
TRINITY_DN66486_c0_g1_i1	0	1	0	1	0	1	0	0	0	0	0	0	0	0	0	0	0	0	0	0	0	0	0	0	0	0	0	0	0	0	0		YKNY	BACSUUncharacterized ABC transporter ATP-binding protein YknY OS=Bacillus subtilis (strain 168) OX=224308 GN=yknY PE=1 SV=1
TRINITY_DN70950_c0_g1_i1	0	0	0	0	0	0	0	0	0	0	0	0	0	0	0	0	0	0	0	0	0	2	0	0	0	0	0	0	0	0	0		YKNV	BACSUUncharacterized ABC transporter ATP-binding protein YknV OS=Bacillus subtilis (strain 168) OX=224308 GN=yknV PE=3 SV=1
TRINITY_DN125424_c0_g1_i1	0	0	0	0	0	0	0	0	0	0	0	0	0	0	9	0	0	0	0	0	0	0	0	0	0	0	0	0	0	0	0		YKM6	SCHPOUPF0613 protein PB24D3.06c OS=Schizosaccharomyces pombe (strain 972 / ATCC 24843) OX=284812 GN=SPAPB24D3.06c PE=3 SV=1
TRINITY_DN81461_c0_g1_i1	0	0	0	0	0	0	0	0	0	0	0	0	0	0	3	0	0	0	0	0	0	0	0	0	0	0	0	0	0	0	0		YKK3	CAEELUncharacterized GTP-binding protein C02F5.3 OS=Caenorhabditis elegans OX=6239 GN=C02F5.3 PE=3 SV=2
TRINITY_DN5591_c0_g1_i6	3.2	1.48	0.91	1.94	0	0.39	0	3	0	3	0	2	0	0	0	5.58	0	2	5	0.53	0	0	0	0	0	0	4.56	0	2.27	0	0		YKIC	SCHPOUncharacterized protein C630.12 OS=Schizosaccharomyces pombe (strain 972 / ATCC 24843) OX=284812 GN=SPAC630.12 PE=3 SV=1
TRINITY_DN44470_c0_g2_i1	0	0	0	1	2	0	0	0	0	0	0	0	0	2	0	0	0	0	0	0	0	0	0	0	0	0	0	0	0	0	0		YKFC	ECOLIProtein YkfC OS=Escherichia coli (strain K12) OX=83333 GN=ykfC PE=4 SV=3
TRINITY_DN90357_c0_g1_i1	2	0	2	1	2	5	0	0	1	1	0	0	3	1	0	1	0	2	0	1	1	0	0	0	0	0	0	0	0	0	0		YKFC	ECOLIProtein YkfC OS=Escherichia coli (strain K12) OX=83333 GN=ykfC PE=4 SV=3
TRINITY_DN131694_c0_g1_i1	0	0	0	0	0	0	0	0	0	0	0	0	0	0	0	0	0	0	0	2	1	0	0	0	0	0	0	0	0	0	0		YKFC	ECOLIProtein YkfC OS=Escherichia coli (strain K12) OX=83333 GN=ykfC PE=4 SV=3
TRINITY_DN101933_c0_g1_i1	0	0	1	0	0	0	0	0	0	0	0	0	0	0	0	1	0	0	0	0	0	0	0	0	0	0	0	0	0	0	0		YKFC	ECOLIProtein YkfC OS=Escherichia coli (strain K12) OX=83333 GN=ykfC PE=4 SV=3
TRINITY_DN124004_c0_g1_i1	0	0	0	1	0	0	0	0	0	1	0	0	0	0	0	0	0	0	0	0	0	0	0	0	0	0	0	0	0	0	0		YKFC	ECOLIProtein YkfC OS=Escherichia coli (strain K12) OX=83333 GN=ykfC PE=4 SV=3
TRINITY_DN91880_c0_g1_i1	0	0	1	0	1	0	0	0	0	0	0	0	0	0	0	0	0	0	0	0	0	0	0	0	0	0	0	0	0	0	0		YKFC	ECOLIProtein YkfC OS=Escherichia coli (strain K12) OX=83333 GN=ykfC PE=4 SV=3
TRINITY_DN80870_c0_g1_i1	0	0	0	0	2	0	1	0	0	0	0	0	0	0	0	0	0	0	0	0	0	0	0	0	0	0	0	0	0	0	0		YK86	CAEELUncharacterized protein C30A5.10 OS=Caenorhabditis elegans OX=6239 GN=C30A5.10 PE=3 SV=4
TRINITY_DN112183_c0_g1_i1	0	0	0	0	0	1	1	0	0	0	0	0	0	0	0	0	0	0	0	0	0	0	0	0	0	0	0	0	0	0	0		YJV3	YEASTUncharacterized protein YJL213W OS=Saccharomyces cerevisiae (strain ATCC 204508 / S288c) OX=559292 GN=YJL213W PE=3 SV=1
TRINITY_DN91353_c0_g1_i1	0	0	0	0	0	0	0	0	0	0	0	0	0	0	9	0	0	0	0	0	0	0	0	0	0	0	0	0	0	0	0		YJU2	MOUSESplicing factor YJU2 OS=Mus musculus OX=10090 GN=Yju2 PE=1 SV=1
TRINITY_DN23952_c0_g1_i2	14	5	11	0	0	0	1	0	0	9	6	10	7.04	14	2	0	6	4	0	0	0	15	0	0	0	12	0	5	0	2	0		YJU2	MOUSESplicing factor YJU2 OS=Mus musculus OX=10090 GN=Yju2 PE=1 SV=1
TRINITY_DN23952_c0_g1_i1	0	0	0	20	10	12	0	6	8	0	0	0	19.96	0	0	12	0	0	15	10	11	0	15	14	10	0	9	0	13	0	10		YJU2	MOUSESplicing factor YJU2 OS=Mus musculus OX=10090 GN=Yju2 PE=1 SV=1
TRINITY_DN115223_c0_g1_i1	0	0	0	0	0	0	0	0	0	0	1	0	0	0	0	0	0	0	0	0	0	0	0	0	0	0	0	1	0	0	0		YJH2	SCHPOUPF0651 protein P31B10.02, mitochondrial OS=Schizosaccharomyces pombe (strain 972 / ATCC 24843) OX=284812 GN=SPCP31B10.02 PE=3 SV=1
TRINITY_DN115127_c0_g1_i1	0	0	1	0	1	0	0	0	0	0	0	0	0	0	0	0	0	0	0	0	0	0	0	0	0	0	0	0	0	0	0		YJGC	BACSUProbable oxidoreductase YjgC OS=Bacillus subtilis (strain 168) OX=224308 GN=yjgC PE=3 SV=1
TRINITY_DN133743_c0_g1_i1	0	0	0	0	0	0	0	0	0	0	0	0	0	0	0	0	0	0	0	0	0	0	1	0	0	0	0	0	1	0	0		YJGC	BACSUProbable oxidoreductase YjgC OS=Bacillus subtilis (strain 168) OX=224308 GN=yjgC PE=3 SV=1
TRINITY_DN2117_c0_g1_i4	25	23.86	40.09	41.35	43.04	33.36	43.67	32	45	29.14	29.39	32	85.39	55.54	5	69	22.45	5	91.55	45.52	47.48	47.4	39.75	46.49	70.23	92.48	45.4	35.93	34.48	27	55.37		YJD4	SCHPOUncharacterized protein C594.04c OS=Schizosaccharomyces pombe (strain 972 / ATCC 24843) OX=284812 GN=SPCC594.04c PE=3 SV=2
TRINITY_DN140256_c0_g1_i1	0	0	0	2	0	1	0	0	0	0	0	0	0	0	0	0	0	0	0	0	0	0	0	0	0	0	0	0	0	0	0		YJCK	BACSUPutative
TRINITY_DN134486_c0_g1_i1	0	0	0	0	0	0	0	0	0	0	0	0	0	0	0	1	0	0	0	0	1	1	3	0	1	2	0	0	0	0	0		YJCD	SCHPOUncharacterized oxidoreductase C736.13 OS=Schizosaccharomyces pombe (strain 972 / ATCC 24843) OX=284812 GN=SPCC736.13 PE=3 SV=1
TRINITY_DN3595_c0_g1_i1	4	7.55	8.04	5.73	2.5	6	5	5	8	10	6.43	4	33.49	11	0	6.67	4.86	0	13.82	10.77	9.55	6.89	3.35	19.68	12.26	15.85	31.63	17.43	7.08	4	4		YJ9J	YEASTUncharacterized protein YJR142W OS=Saccharomyces cerevisiae (strain ATCC 204508 / S288c) OX=559292 GN=YJR142W PE=1 SV=1
TRINITY_DN39955_c1_g1_i1	0	2	0	0	1	0	1	0	0	0	0	0	0	1	0	0	0	0	0	1	2	0	1	1	2	1	0	2	0	0	0		YJ95	SCHPOUncharacterized RING finger protein C548.05c OS=Schizosaccharomyces pombe (strain 972 / ATCC 24843) OX=284812 GN=SPCC548.05c PE=4 SV=1
TRINITY_DN6895_c0_g1_i2	0	4.25	4.83	0	0	1.61	0	0	0	1.29	2.58	2	3.1	0	0	0	1.25	0	5.15	3.07	0	0	1.18	1.17	3.07	0	4.65	0	3.51	0	3		YJ2I	SCHPOUncharacterized protein C4B3.18 OS=Schizosaccharomyces pombe (strain 972 / ATCC 24843) OX=284812 GN=SPCC4B3.18 PE=3 SV=1
TRINITY_DN6895_c0_g1_i3	3.25	1.75	5.17	10	1.29	5.39	2.53	8	3.87	5.24	6.69	0	16.85	4.75	0	12	1.66	2.29	9.27	6.87	7.67	24.79	6.82	18.83	3.54	11	7.04	9	5.35	1	0		YJ2I	SCHPOUncharacterized protein C4B3.18 OS=Schizosaccharomyces pombe (strain 972 / ATCC 24843) OX=284812 GN=SPCC4B3.18 PE=3 SV=1
TRINITY_DN6895_c0_g1_i4	1.75	0	0	0	0	0	1	0	0	0	1.19	0	5.05	0	0	0	0	5.71	0	0	0	0	0	0	6.39	0	0	0	0	0	0		YJ2I	SCHPOUncharacterized protein C4B3.18 OS=Schizosaccharomyces pombe (strain 972 / ATCC 24843) OX=284812 GN=SPCC4B3.18 PE=3 SV=1
TRINITY_DN6895_c0_g1_i12	0	0	0	0	0.71	0	2.47	0	0.13	0.47	0.54	0	0	6.25	0	0	1.09	0	0.58	1.06	1.33	2.21	0	0	0	0	0.31	1	1.14	0	0		YJ2I	SCHPOUncharacterized protein C4B3.18 OS=Schizosaccharomyces pombe (strain 972 / ATCC 24843) OX=284812 GN=SPCC4B3.18 PE=3 SV=1
TRINITY_DN3598_c0_g2_i1	1	1	3	1	4	3	2	2	3	2	1	2	6	2	0	2	0	1	0	0	1	4	2	3	3	0	1	2	1	1	2		YJ2B	SCHPOUncharacterized bolA-like protein C4B3.11c OS=Schizosaccharomyces pombe (strain 972 / ATCC 24843) OX=284812 GN=SPCC4B3.11c PE=3 SV=1
TRINITY_DN66271_c0_g1_i1	0	0	0	0	0	0	0	0	0	0	0	0	0	0	2	0	0	0	0	0	0	0	0	0	0	0	0	0	0	0	0		YJ2B	SCHPOUncharacterized bolA-like protein C4B3.11c OS=Schizosaccharomyces pombe (strain 972 / ATCC 24843) OX=284812 GN=SPCC4B3.11c PE=3 SV=1
TRINITY_DN35196_c0_g1_i1	0	0	0	0	0	0	0	0	0	0	0	0	0	0	1	0	0	0	0	0	0	0	0	0	0	0	0	0	0	0	0		YJ23	SCHPOUncharacterized protein C4B3.03c OS=Schizosaccharomyces pombe (strain 972 / ATCC 24843) OX=284812 GN=SPCC4B3.03c PE=1 SV=1
TRINITY_DN127406_c0_g1_i1	0	0	0	0	0	0	0	0	0	2	0	0	0	1	0	0	0	0	0	0	0	1	0	0	0	0	0	0	0	0	0		YIW2	YEASTUncharacterized protein YIR042C OS=Saccharomyces cerevisiae (strain ATCC 204508 / S288c) OX=559292 GN=YIR042C PE=4 SV=1
TRINITY_DN90026_c0_g1_i1	0	0	0	0	0	0	0	0	0	0	0	0	2	0	0	0	0	0	0	0	0	0	1	0	0	0	0	0	0	0	0		YITJ	BACSUBifunctional homocysteine S-methyltransferase/5,10-methylenetetrahydrofolate reductase OS=Bacillus subtilis (strain 168) OX=224308 GN=yitJ PE=2 SV=1
TRINITY_DN130561_c0_g1_i1	0	0	0	0	0	0	0	0	0	0	0	0	0	0	3	0	0	0	0	0	0	0	0	0	0	0	0	0	0	0	0		YIS2	SHISOInsertion element IS600 uncharacterized 31 kDa protein OS=Shigella sonnei OX=624 PE=4 SV=1
TRINITY_DN66806_c0_g1_i2	0	0	0	0	0	0	0	0	0	0	0	0	0	0	11.44	0	0	0	0	0	0	0	0	0	0	0	0	0	0	0	0		YIPF6	XENTRProtein YIPF6 OS=Xenopus tropicalis OX=8364 GN=yipf6 PE=2 SV=1
TRINITY_DN66806_c0_g1_i1	0	0	0	0	0	0	0	0	0	0	0	0	0	0	6.56	0	0	0	0	0	0	0	0	0	0	0	0	0	0	0	0		YIPF6	XENTRProtein YIPF6 OS=Xenopus tropicalis OX=8364 GN=yipf6 PE=2 SV=1
TRINITY_DN1166_c0_g1_i32	0	33.99	51.65	0	38.27	28.26	0	26.77	14.55	0	0	0	27.28	0	0	0	0	0	26.22	37.88	0	0	0	0	45.56	0	0	27.18	0	18.17	0		YIPF6	DANREProtein YIPF6 OS=Danio rerio OX=7955 GN=yipf6 PE=2 SV=1
TRINITY_DN1166_c0_g1_i51	0	0	0	0	0	71.71	0	0	122.48	0	0	48.86	175.74	0	0	84.58	0	0	0	0	0	140.5	0	48.63	0	60.65	0	0	0	42.95	55.15		YIPF6	DANREProtein YIPF6 OS=Danio rerio OX=7955 GN=yipf6 PE=2 SV=1
TRINITY_DN1166_c0_g1_i22	32.16	0	0	86.66	0	91.84	0	23.11	5.14	25.49	0	0	6.81	14.38	0	51.18	23.2	0	113.37	28.28	0	24.98	0	24.29	0.54	35.07	0	53.39	24.52	0	29.83		YIPF6	DANREProtein YIPF6 OS=Danio rerio OX=7955 GN=yipf6 PE=2 SV=1
TRINITY_DN1166_c0_g1_i43	0	29.69	54.27	0	0	49.68	0	0	0	0	0	0	0	0	15	0	15.45	0	0	0	0	0	36.15	0	0	53.47	59.48	35.03	52.62	17.02	0		YIPF6	DANREProtein YIPF6 OS=Danio rerio OX=7955 GN=yipf6 PE=2 SV=1
TRINITY_DN1166_c0_g1_i55	61.47	0	58.37	84.35	35.69	7.18	44.44	11.68	45.06	28.86	43.7	23.76	101.83	58.84	0	31.19	17.53	16.32	43.45	46.48	42.51	19.94	26.55	31.34	69.8	89.61	28.72	24.38	35.02	29.39	78.79		YIPF6	DANREProtein YIPF6 OS=Danio rerio OX=7955 GN=yipf6 PE=2 SV=1
TRINITY_DN1166_c0_g1_i4	0	10.1	18.09	6.75	6.37	0	4.55	5.86	0	15.48	15.78	1.63	7.06	7.87	0	0	0	2.18	16.6	0	7.53	0	6.03	16.06	0	0	12.06	12.98	23.28	0	8.27		YIPF6	DANREProtein YIPF6 OS=Danio rerio OX=7955 GN=yipf6 PE=2 SV=1
TRINITY_DN1166_c0_g1_i26	67.34	0	0	33.65	0	0	0	73.12	0	0	33.66	0	0	0	0	33.62	0	31.5	33.63	33.65	0	15.5	172.84	0	124.62	95.49	67.33	67.26	0	33.67	80.06		YIPF6	DANREProtein YIPF6 OS=Danio rerio OX=7955 GN=yipf6 PE=2 SV=1
TRINITY_DN1166_c0_g1_i86	19.31	70.9	84.65	89.6	122.67	30.59	203.57	59.54	0	106.17	99.84	41.23	163.28	178.91	0	41.96	62.42	0	114.96	52.39	57.36	83.65	0	147.37	0	0	68.97	2.79	156.85	80.8	124.86		YIPF6	DANREProtein YIPF6 OS=Danio rerio OX=7955 GN=yipf6 PE=2 SV=1
TRINITY_DN79926_c0_g1_i1	0	0	0	0	0	0	0	0	0	0	0	0	0	0	0	0	0	0	0	0	0	0	0	0	0	0	0	0	0	0	0		YIPF6	BOVINProtein YIPF6 OS=Bos taurus OX=9913 GN=YIPF6 PE=2 SV=1
TRINITY_DN1237_c0_g1_i105	2.55	0	13.5	0	2.92	4.53	18.1	14.85	15.61	0	8.21	7.42	8.12	20.71	1	9.42	1.87	5.49	16.93	0	18.29	2.15	0	0	2.04	4.27	6.09	13.4	16.2	0	0		YIPF5	RATProtein YIPF5 OS=Rattus norvegicus OX=10116 GN=Yipf5 PE=2 SV=1
TRINITY_DN1237_c0_g1_i112	0	32.53	0	29.5	0	0	0	0	0	0	0	0	0	0.26	0	0	0	0	0	0	28.47	0	0	0	0	0	58.39	0	0	0	0		YIPF5	RATProtein YIPF5 OS=Rattus norvegicus OX=10116 GN=Yipf5 PE=2 SV=1
TRINITY_DN1237_c0_g1_i8	8.58	17.42	20.37	20.65	9.74	17.76	0	1.86	0	0	1.49	0.23	32.88	0.69	0	11.75	7.48	2.89	6.93	28.36	0	26.48	16.93	19.96	17.3	7.61	1.13	12.57	4.25	7.66	5.06		YIPF5	RATProtein YIPF5 OS=Rattus norvegicus OX=10116 GN=Yipf5 PE=2 SV=1
TRINITY_DN1237_c0_g1_i4	13.51	20.61	12.75	16.58	0	8.3	34.88	3.37	0	19	5.55	5.14	14.19	9.06	0	5.23	0	0	14.48	15.25	2.62	0	19.93	66.62	11.05	17.83	22.78	19.36	26.67	0	4.74		YIPF5	RATProtein YIPF5 OS=Rattus norvegicus OX=10116 GN=Yipf5 PE=2 SV=1
TRINITY_DN1237_c0_g1_i88	0	0	0	9.21	0	14.55	0	20.45	6.36	11.54	0	0	0	23.68	0	5.6	0	5.17	0.88	0	0	0	0	0.77	12.78	0	4.11	0.01	0.49	0	0		YIPF5	RATProtein YIPF5 OS=Rattus norvegicus OX=10116 GN=Yipf5 PE=2 SV=1
TRINITY_DN1237_c0_g1_i22	28.17	31.73	58.44	4.7	28.65	35.85	62.67	38.19	81.53	20.37	56.14	19.96	60.71	17.34	0	64.11	12.07	0	73.9	47.13	0	11.59	47.52	64.75	26.43	48.44	33.77	44.18	100.88	3.14	1.54		YIPF5	RATProtein YIPF5 OS=Rattus norvegicus OX=10116 GN=Yipf5 PE=2 SV=1
TRINITY_DN1237_c0_g1_i128	0	0	0	0	0	0	0	0	0	13.05	0	0	0	10.43	0	0	0	0	0	0	3.34	0	0	0	0	0	0	0	0	0	0		YIPF5	RATProtein YIPF5 OS=Rattus norvegicus OX=10116 GN=Yipf5 PE=2 SV=1
TRINITY_DN1237_c0_g1_i115	1.07	0	0	0	2.83	0	0	0	0	0	0.41	2.27	0	0	0	0	0	0	0	0	0	3.19	0	0	0	0	0	0.73	0	1.91	0		YIPF5	RATProtein YIPF5 OS=Rattus norvegicus OX=10116 GN=Yipf5 PE=2 SV=1
TRINITY_DN49637_c0_g2_i1	0	0	0	0	0	0	0	0	0	0	0	0	0	0	19	0	0	0	0	0	0	0	0	0	0	0	0	0	0	0	0		YIPF5	HUMANProtein YIPF5 OS=Homo sapiens OX=9606 GN=YIPF5 PE=1 SV=1
TRINITY_DN49637_c0_g1_i1	0	0	0	0	0	0	0	0	0	0	0	0	0	0	6	0	0	0	0	0	0	0	0	0	0	0	0	0	0	0	0		YIPF5	BOVINProtein YIPF5 OS=Bos taurus OX=9913 GN=YIPF5 PE=2 SV=1
TRINITY_DN87532_c0_g1_i1	0	0	0	0	0	0	0	0	0	0	0	0	0	0	3	0	0	0	0	0	0	0	0	0	0	0	0	0	0	0	0		YIPF4	DANREProtein YIPF4 OS=Danio rerio OX=7955 GN=yipf4 PE=2 SV=1
TRINITY_DN42680_c0_g1_i3	0	0	0	0	0	0	0	0	0	0	0	0	0	0	4.48	0	0	0	0	0	0	0	0	0	0	0	0	0	0	0	0		YIPF3	RATProtein YIPF3 OS=Rattus norvegicus OX=10116 GN=Yipf3 PE=2 SV=1
TRINITY_DN42680_c0_g1_i4	0	0	0	0	0	0	0	0	0	0	0	0	0	0	12.95	0	0	0	0	0	0	0	0	0	0	0	0	0	0	0	0		YIPF3	RATProtein YIPF3 OS=Rattus norvegicus OX=10116 GN=Yipf3 PE=2 SV=1
TRINITY_DN42680_c0_g1_i5	0	0	0	0	0	0	0	0	0	0	0	0	0	0	6.25	0	0	0	0	0	0	0	0	0	0	0	0	0	0	0	0		YIPF3	RATProtein YIPF3 OS=Rattus norvegicus OX=10116 GN=Yipf3 PE=2 SV=1
TRINITY_DN42680_c0_g1_i2	0	0	0	0	0	0	0	0	0	0	0	0	0	0	4.33	0	0	0	0	0	0	0	0	0	0	0	0	0	0	0	0		YIPF3	DANREProtein YIPF3 OS=Danio rerio OX=7955 GN=yipf3 PE=2 SV=1
TRINITY_DN41394_c0_g1_i1	0	0	0	0	0	1	0	0	0	0	0	0	0	0	0	0	0	0	0	0	0	0	0	0	0	0	0	0	0	0	0		YIN1	STRAMUncharacterized HTH-type transcriptional regulator in unstable DNA locus OS=Streptomyces ambofaciens OX=1889 PE=4 SV=1
TRINITY_DN17284_c0_g1_i43	17.51	10.17	0	18.58	0	20.71	25.91	23.52	0	7.71	12.64	12.22	16.38	0	0	0	0	0	0	0	0	0	24.11	20.36	0	19.6	9.02	15.36	18.37	4.3	10.05		YIHR	ECOLIUncharacterized protein YihR OS=Escherichia coli (strain K12) OX=83333 GN=yihR PE=1 SV=1
TRINITY_DN17284_c0_g1_i35	0	7.79	12.29	8.21	9.29	0	27.6	3.88	20.37	0	4.6	5.57	23.42	10.26	0	14.15	6.91	4.14	14.5	9.84	8.6	15.17	17.99	35.58	4.92	24.71	24.55	15.26	19.58	2.17	12.43		YIHR	ECOLIUncharacterized protein YihR OS=Escherichia coli (strain K12) OX=83333 GN=yihR PE=1 SV=1
TRINITY_DN53508_c0_g1_i1	0	2	1	0	3	4	1	0	1	0	0	0	0	0	0	1	0	0	0	1	0	0	0	0	0	0	0	0	0	0	0		YIH50	HALSAUncharacterized protein in transposable element ISH50 OS=Halobacterium salinarum (strain ATCC 700922 / JCM 11081 / NRC-1) OX=64091 GN=VNG	0918H PE=4 SV=2
TRINITY_DN3717_c0_g1_i2	7	6.14	31	20.27	11.41	16.2	18	17	23	12	23	7	39	21	1	16.61	9	0	30	13	11	18	20	15	23	16.17	15	14.65	15	6.09	3.33		YIF1B	XENTRProtein YIF1B OS=Xenopus tropicalis OX=8364 GN=yif1b PE=2 SV=1
TRINITY_DN96673_c0_g1_i1	0	0	0	0	0	0	0	0	0	0	0	0	0	0	4	0	0	0	0	0	0	0	0	0	0	0	0	0	0	0	0		YIF1B	RATProtein YIF1B OS=Rattus norvegicus OX=10116 GN=Yif1b PE=2 SV=2
TRINITY_DN3717_c0_g1_i1	0	7.86	0	5.73	3.59	5.8	0	0	0	0	0	0	0	0	0	1.39	0	1	0	0	0	0	0	0	0	2.83	0	4.35	0	2.91	10.67		YIF1B	DANREProtein YIF1B OS=Danio rerio OX=7955 GN=yif1b PE=2 SV=2
TRINITY_DN98320_c0_g1_i1	0	0	0	0	0	0	0	0	0	0	0	0	0	0	0	0	0	0	0	0	0	0	0	1	0	1	0	0	0	0	0		YIDD	PETMOPutative membrane protein insertion efficiency factor OS=Petrotoga mobilis (strain DSM 10674 / SJ95) OX=403833 GN=Pmob	0605 PE=3 SV=1
TRINITY_DN95742_c0_g1_i1	0	0	0	0	0	0	0	0	0	0	0	0	0	0	0	0	1	0	1	1	0	1	1	0	0	0	0	0	0	0	0		YIDC	SYNPXMembrane protein insertase YidC OS=Synechococcus sp. (strain WH8102) OX=84588 GN=yidC PE=3 SV=1
TRINITY_DN58970_c0_g1_i1	0	0	0	0	0	0	0	2	0	0	0	0	0	0	0	3	0	0	0	0	0	0	0	0	0	0	0	0	0	0	0		YIDC	SYNPXMembrane protein insertase YidC OS=Synechococcus sp. (strain WH8102) OX=84588 GN=yidC PE=3 SV=1
TRINITY_DN41236_c0_g1_i1	0	0	1	1	1	1	0	0	0	0	0	1	0	0	0	1	1	0	0	1	1	0	0	0	0	0	0	0	0	0	0		YIDC	SYNPXMembrane protein insertase YidC OS=Synechococcus sp. (strain WH8102) OX=84588 GN=yidC PE=3 SV=1
TRINITY_DN146059_c0_g1_i1	0	0	0	0	0	0	0	0	0	0	0	0	0	0	0	0	0	0	0	0	0	0	0	1	0	0	0	0	1	0	0		YIDC	SYNFMMembrane protein insertase YidC OS=Syntrophobacter fumaroxidans (strain DSM 10017 / MPOB) OX=335543 GN=yidC PE=3 SV=1
TRINITY_DN141628_c0_g1_i1	0	0	2	0	0	0	0	0	0	0	1	1	0	1	0	1	0	0	0	2	1	0	0	0	0	0	0	0	0	0	0		YIDC	STRCOMembrane protein insertase YidC OS=Streptomyces coelicolor (strain ATCC BAA-471 / A3(2) / M145) OX=100226 GN=yidC PE=3 SV=1
TRINITY_DN115553_c0_g1_i1	0	1	0	0	0	0	0	1	0	0	0	0	0	0	0	0	0	0	0	0	0	0	0	0	0	0	0	0	0	0	0		YIDC	ROSDOMembrane protein insertase YidC OS=Roseobacter denitrificans (strain ATCC 33942 / OCh 114) OX=375451 GN=yidC PE=3 SV=1
TRINITY_DN73971_c0_g1_i1	0	0	0	2	0	0	0	0	0	0	0	0	0	0	0	0	0	0	0	0	0	0	0	0	0	0	0	0	0	0	0		YIDC	RHOS1Membrane protein insertase YidC OS=Rhodobacter sphaeroides (strain ATCC 17029 / ATH 2.4.9) OX=349101 GN=yidC PE=3 SV=1
TRINITY_DN118309_c0_g1_i1	0	0	0	0	0	0	1	0	1	0	0	0	0	0	0	0	0	0	0	0	1	0	0	0	0	0	0	0	0	0	0		YIDC	PSEMYMembrane protein insertase YidC OS=Pseudomonas mendocina (strain ymp) OX=399739 GN=yidC PE=3 SV=1
TRINITY_DN41236_c0_g1_i2	0	0	0	0	0	0	0	0	0	0	0	0	0	0	0	0	0	0	0	0	0	0	0	1	0	0	0	0	0	0	0		YIDC	PROMMMembrane protein insertase YidC OS=Prochlorococcus marinus (strain MIT 9313) OX=74547 GN=yidC PE=3 SV=1
TRINITY_DN65769_c0_g1_i1	0	0	0	0	0	0	0	0	0	0	0	0	0	0	2	0	0	0	0	0	0	0	0	0	0	0	0	0	0	0	0		YIDC	NITOCMembrane protein insertase YidC OS=Nitrosococcus oceani (strain ATCC 19707 / BCRC 17464 / NCIMB 11848 / C-107) OX=323261 GN=yidC PE=3 SV=1
TRINITY_DN115280_c0_g1_i1	0	0	0	0	1	0	0	0	0	0	0	2	0	0	0	0	0	0	0	0	0	0	0	0	0	0	0	0	0	0	0		YIDC	MARHVMembrane protein insertase YidC OS=Marinobacter hydrocarbonoclasticus (strain ATCC 700491 / DSM 11845 / VT8) OX=351348 GN=yidC PE=3 SV=1
TRINITY_DN140788_c0_g1_i1	0	0	0	1	1	0	0	0	0	0	0	0	0	0	0	0	0	0	0	0	0	0	0	0	0	0	0	0	0	0	0		YIDC	JANSCMembrane protein insertase YidC OS=Jannaschia sp. (strain CCS1) OX=290400 GN=yidC PE=3 SV=1
TRINITY_DN119147_c0_g1_i1	0	0	0	0	0	0	0	0	0	0	1	0	0	1	0	0	0	0	0	0	0	0	0	0	0	0	0	0	1	0	0		YIDC	JANSCMembrane protein insertase YidC OS=Jannaschia sp. (strain CCS1) OX=290400 GN=yidC PE=3 SV=1
TRINITY_DN128256_c0_g1_i1	0	0	0	0	0	0	0	0	0	0	0	0	0	1	0	0	0	0	0	0	0	0	2	0	0	0	0	0	0	0	0		YIDC	EDWI9Membrane protein insertase YidC OS=Edwardsiella ictaluri (strain 93-146) OX=634503 GN=yidC PE=3 SV=1
TRINITY_DN73215_c0_g1_i1	0	1	0	1	0	0	0	0	0	0	0	0	0	0	0	0	0	0	0	0	0	0	0	0	0	0	0	0	0	0	0		YIDC	DINSHMembrane protein insertase YidC OS=Dinoroseobacter shibae (strain DSM 16493 / NCIMB 14021 / DFL 12) OX=398580 GN=yidC PE=3 SV=1
TRINITY_DN79132_c0_g1_i1	0	0	0	0	0	0	0	0	0	0	0	0	0	0	0	0	0	0	1	0	0	0	0	1	0	0	0	0	0	0	0		YIDC	AMOA5Membrane protein insertase YidC OS=Amoebophilus asiaticus (strain 5a2) OX=452471 GN=yidC PE=3 SV=1
TRINITY_DN79867_c0_g1_i1	0	0	0	0	0	0	0	0	0	0	0	0	0	0	3	0	0	0	0	0	0	0	0	0	0	0	0	0	0	0	0		YIBN	ECO57Uncharacterized protein YibN OS=Escherichia coli O157:H7 OX=83334 GN=yibN PE=3 SV=1
TRINITY_DN112858_c0_g1_i1	0	1	0	0	0	0	0	0	0	0	0	0	0	0	0	0	0	2	0	0	0	0	0	1	0	0	0	0	0	0	0		YIBL	ECO57Uncharacterized protein YibL OS=Escherichia coli O157:H7 OX=83334 GN=yibL PE=4 SV=1
TRINITY_DN74175_c0_g1_i1	0	0	0	0	0	0	0	0	0	0	2	0	0	0	0	0	0	0	0	0	0	0	0	0	0	0	0	0	0	0	0		YIAO	ECOLI2,3-diketo-L-gulonate-binding periplasmic protein YiaO OS=Escherichia coli (strain K12) OX=83333 GN=yiaO PE=1 SV=1
TRINITY_DN133549_c0_g1_i1	0	0	0	0	0	0	0	0	0	0	0	0	0	0	3	0	0	0	0	0	0	0	0	0	0	0	0	0	0	0	0		YIAO	ECOLI2,3-diketo-L-gulonate-binding periplasmic protein YiaO OS=Escherichia coli (strain K12) OX=83333 GN=yiaO PE=1 SV=1
TRINITY_DN104896_c0_g1_i1	3	3	2	3	3	4	6	1	1	3	10	2	3	9	0	0	0	1	3	0	1	1	1	1	0	1	2	0	1	0	0		YIAD	ECOLIProbable lipoprotein YiaD OS=Escherichia coli (strain K12) OX=83333 GN=yiaD PE=1 SV=2
TRINITY_DN105986_c0_g1_i1	0	0	0	0	0	0	0	0	0	0	0	0	0	0	2	0	0	0	0	0	0	0	0	0	0	0	0	0	0	0	0		YIA6	YEASTMitochondrial nicotinamide adenine dinucleotide transporter 1 OS=Saccharomyces cerevisiae (strain ATCC 204508 / S288c) OX=559292 GN=YIA6 PE=1 SV=1
TRINITY_DN14491_c3_g1_i1	0	0	0	0	0	0	0	0	0	0	0	0	0	0	2	0	0	0	0	0	0	0	0	0	0	0	0	0	0	0	0		YIA1	YEASTAnkyrin repeat-containing protein YIL001W OS=Saccharomyces cerevisiae (strain ATCC 204508 / S288c) OX=559292 GN=YIL001W PE=1 SV=1
TRINITY_DN2035_c1_g1_i13	0.5	0	0	1.5	0	0	0	0	0	0	0	0	0	0	0	0	3	1.01	0	0	0	0	0	0	0	0.25	0	0	0	0	0		YIA1	YEASTAnkyrin repeat-containing protein YIL001W OS=Saccharomyces cerevisiae (strain ATCC 204508 / S288c) OX=559292 GN=YIL001W PE=1 SV=1
TRINITY_DN2035_c1_g1_i17	0	1	0	0	0	0	0	0	0	0	0	0	0	0	0	0	0	0	2	0	0.5	0	0	0	0	0	0	0	0	0	0		YIA1	YEASTAnkyrin repeat-containing protein YIL001W OS=Saccharomyces cerevisiae (strain ATCC 204508 / S288c) OX=559292 GN=YIL001W PE=1 SV=1
TRINITY_DN2035_c1_g1_i4	0.5	2.35	2	1.5	0	0	1	0	0	0	0	0	0	4.18	0	0	0	0	0	0	0	0.82	0	3	0	0.25	1	0	0	0	0		YIA1	YEASTAnkyrin repeat-containing protein YIL001W OS=Saccharomyces cerevisiae (strain ATCC 204508 / S288c) OX=559292 GN=YIL001W PE=1 SV=1
TRINITY_DN2035_c1_g1_i22	0	1	0.42	0	1	0	0.33	1	0	0	2	0.5	0	1.14	0	0	0	1.79	0	0	0	0	0	0	0	0	6.21	0	0	0	0		YIA1	YEASTAnkyrin repeat-containing protein YIL001W OS=Saccharomyces cerevisiae (strain ATCC 204508 / S288c) OX=559292 GN=YIL001W PE=1 SV=1
TRINITY_DN73921_c0_g1_i1	0	0	0	1	0	0	0	0	0	0	0	0	1	0	0	0	0	0	0	0	0	0	0	0	0	0	0	0	0	0	0		YI71	BURM1Insertion element IS407 uncharacterized 31.7 kDa protein OS=Burkholderia multivorans (strain ATCC 17616 / 249) OX=395019 GN=Bmul	4719 PE=4 SV=2
TRINITY_DN118924_c0_g1_i1	1	0	1	0	0	0	0	0	0	0	0	0	0	0	0	0	0	0	0	0	0	0	0	0	0	0	0	0	0	0	0		YI61	XANEUInsertion element IS476 uncharacterized 39.2 kDa protein OS=Xanthomonas euvesicatoria OX=456327 PE=4 SV=1
TRINITY_DN21733_c0_g1_i1	0	0	2	0	0	0	0	0	0	0	0	0	0	0	0	13	0	0	0	0	0	0	6	0	0	0	0	0	0	0	1		YI31B	YEASTTransposon Ty3-I Gag-Pol polyprotein OS=Saccharomyces cerevisiae (strain ATCC 204508 / S288c) OX=559292 GN=TY3B-I PE=1 SV=2
TRINITY_DN123705_c0_g1_i1	0	0	0	0	0	0	0	0	0	0	0	0	0	0	10	0	0	0	0	0	0	0	0	0	0	0	0	0	0	0	0		YI31B	YEASTTransposon Ty3-I Gag-Pol polyprotein OS=Saccharomyces cerevisiae (strain ATCC 204508 / S288c) OX=559292 GN=TY3B-I PE=1 SV=2
TRINITY_DN4612_c3_g1_i1	0	0	0	0	1	0	0	0	0	0	1	0	0	2	0	0	0	0	0	2	0	0	0	2	0	0	3	3	3	0	0		YI31B	YEASTTransposon Ty3-I Gag-Pol polyprotein OS=Saccharomyces cerevisiae (strain ATCC 204508 / S288c) OX=559292 GN=TY3B-I PE=1 SV=2
TRINITY_DN15623_c0_g1_i25	0	3	0	1	0	1.68	3	0	2	0	0	0	4.25	1	0	0	0	0	2	1	0	0	0	0	1.14	1	0	4.51	2.88	0	0		YI31B	YEASTTransposon Ty3-I Gag-Pol polyprotein OS=Saccharomyces cerevisiae (strain ATCC 204508 / S288c) OX=559292 GN=TY3B-I PE=1 SV=2
TRINITY_DN30402_c0_g1_i5	5	11	7	2.61	0	3.91	64	8	5.11	6	1.58	2.64	19.11	6.61	1	9	0	0	12	0	7	0	9.32	4.86	7.68	25.4	0	3.18	10	3.49	1.98		YI31B	YEASTTransposon Ty3-I Gag-Pol polyprotein OS=Saccharomyces cerevisiae (strain ATCC 204508 / S288c) OX=559292 GN=TY3B-I PE=1 SV=2
TRINITY_DN27532_c0_g1_i13	0	0	0	0	0	0	0	0	0	0	0	0	1	1.47	0	0	0	0	0	0	0	1	0	2	0	0	0	0	0	0	0		YI31B	YEASTTransposon Ty3-I Gag-Pol polyprotein OS=Saccharomyces cerevisiae (strain ATCC 204508 / S288c) OX=559292 GN=TY3B-I PE=1 SV=2
TRINITY_DN27532_c0_g1_i14	1	0	0	2	0	0	0	1	2.63	0	0	1	1	0	0	1	0	0	0	0	0	1	0	0	0	1	0	0	2	0	0		YI31B	YEASTTransposon Ty3-I Gag-Pol polyprotein OS=Saccharomyces cerevisiae (strain ATCC 204508 / S288c) OX=559292 GN=TY3B-I PE=1 SV=2
TRINITY_DN23358_c0_g1_i3	0	0	0	1	1	0	0	0	0	0	0	0	1	0	0	0	0	0	0	0	0	1	0	0	0	0	1	0	0	1	3		YI31B	YEASTTransposon Ty3-I Gag-Pol polyprotein OS=Saccharomyces cerevisiae (strain ATCC 204508 / S288c) OX=559292 GN=TY3B-I PE=1 SV=2
TRINITY_DN125076_c0_g1_i1	0	0	0	0	0	0	0	0	0	0	0	0	0	0	3	0	0	0	0	0	0	0	0	0	0	0	0	0	0	0	0		YI31B	YEASTTransposon Ty3-I Gag-Pol polyprotein OS=Saccharomyces cerevisiae (strain ATCC 204508 / S288c) OX=559292 GN=TY3B-I PE=1 SV=2
TRINITY_DN27532_c0_g1_i9	0	1	0	0	0	0	1	0	0	0	0	0	0	1.53	0	0	0	0	0	0	0	0	0	0	0	0	0	0	0	0	0		YI31B	YEASTTransposon Ty3-I Gag-Pol polyprotein OS=Saccharomyces cerevisiae (strain ATCC 204508 / S288c) OX=559292 GN=TY3B-I PE=1 SV=2
TRINITY_DN5671_c0_g1_i15	0	0	1.17	0.37	0	0	0	0	0	0	0	0.98	0	0	0	4.09	0	6.15	0	0	5.06	0	0	0	0	0	1.55	0	0	0	0		YI31B	YEASTTransposon Ty3-I Gag-Pol polyprotein OS=Saccharomyces cerevisiae (strain ATCC 204508 / S288c) OX=559292 GN=TY3B-I PE=1 SV=2
TRINITY_DN103362_c0_g1_i1	0	0	0	0	0	0	0	0	0	0	0	0	0	0	4	0	0	0	0	0	0	0	0	0	0	0	0	0	0	0	0		YI31B	YEASTTransposon Ty3-I Gag-Pol polyprotein OS=Saccharomyces cerevisiae (strain ATCC 204508 / S288c) OX=559292 GN=TY3B-I PE=1 SV=2
TRINITY_DN21501_c0_g1_i1	0	0	0	0	0	0	0	0	0	0	0	0	0	0	0	0	0	0	0	0	0	0	0	0	0	0	1	0	0	0	0		YI31B	YEASTTransposon Ty3-I Gag-Pol polyprotein OS=Saccharomyces cerevisiae (strain ATCC 204508 / S288c) OX=559292 GN=TY3B-I PE=1 SV=2
TRINITY_DN5671_c0_g1_i19	0	2.25	0	0	0	0	0	0	0	0	1.36	0	0	0	0	0	0	0	0	2.48	5.32	0	2.21	0	1.76	4.25	0	0	0	1.45	0		YI31B	YEASTTransposon Ty3-I Gag-Pol polyprotein OS=Saccharomyces cerevisiae (strain ATCC 204508 / S288c) OX=559292 GN=TY3B-I PE=1 SV=2
TRINITY_DN9363_c0_g1_i1	0	0	0	1	0	0	0	0	0	0	0	0	1	0	0	1.27	0	0	1.06	0	1	0	0	0	0	0.93	0	1	0	0	1		YI31B	YEASTTransposon Ty3-I Gag-Pol polyprotein OS=Saccharomyces cerevisiae (strain ATCC 204508 / S288c) OX=559292 GN=TY3B-I PE=1 SV=2
TRINITY_DN126548_c0_g1_i1	0	0	0	0	0	0	0	0	0	0	0	0	0	0	1	0	0	0	0	0	0	0	0	0	0	0	0	0	0	0	0		YI31B	YEASTTransposon Ty3-I Gag-Pol polyprotein OS=Saccharomyces cerevisiae (strain ATCC 204508 / S288c) OX=559292 GN=TY3B-I PE=1 SV=2
TRINITY_DN12026_c0_g5_i1	0	0	0	0	0	0	0	0	0	0	0	1	1	0	0	0	0	0	0	0	1	0	0	0	0	0	0	0	0	0	0		YI31B	YEASTTransposon Ty3-I Gag-Pol polyprotein OS=Saccharomyces cerevisiae (strain ATCC 204508 / S288c) OX=559292 GN=TY3B-I PE=1 SV=2
TRINITY_DN20728_c0_g1_i14	0	0	1.95	0	0	2.68	0	2.62	0	1.84	0	4.35	9.04	0	0	0	0	0	2	2.41	2	0	0	1.54	1.59	3.33	0	0	1.21	1	0		YI31B	YEASTTransposon Ty3-I Gag-Pol polyprotein OS=Saccharomyces cerevisiae (strain ATCC 204508 / S288c) OX=559292 GN=TY3B-I PE=1 SV=2
TRINITY_DN165_c1_g1_i9	0	0	0	2.49	8.51	0	4.37	69.79	20.93	0	0	0	72.43	4.64	0.92	0	0	0	38.84	12.57	106.38	0	65.42	0	27.23	61.11	12.23	68.05	80.89	0	30.66		YI31B	YEASTTransposon Ty3-I Gag-Pol polyprotein OS=Saccharomyces cerevisiae (strain ATCC 204508 / S288c) OX=559292 GN=TY3B-I PE=1 SV=2
TRINITY_DN91850_c0_g1_i1	0	0	0	0	0	0	0	0	0	0	0	0	0	0	4	0	0	0	0	0	0	0	0	0	0	0	0	0	0	0	0		YI31B	YEASTTransposon Ty3-I Gag-Pol polyprotein OS=Saccharomyces cerevisiae (strain ATCC 204508 / S288c) OX=559292 GN=TY3B-I PE=1 SV=2
TRINITY_DN3869_c1_g1_i2	0	1	0	0	0	0	0	0	0	0	0	0	0	0	0	0	0	0	0	0	0	0	0	5	1	0	2	1	1	0	0		YI31B	YEASTTransposon Ty3-I Gag-Pol polyprotein OS=Saccharomyces cerevisiae (strain ATCC 204508 / S288c) OX=559292 GN=TY3B-I PE=1 SV=2
TRINITY_DN165_c1_g1_i24	14.24	0	0	0	0	14.91	19.85	43	0	2.41	0	31.67	12.66	29.73	0	127.93	7.75	20.29	33.83	68.22	47.84	0	60.83	71.41	14.51	0	0	18.37	46.1	4.81	0		YI31B	YEASTTransposon Ty3-I Gag-Pol polyprotein OS=Saccharomyces cerevisiae (strain ATCC 204508 / S288c) OX=559292 GN=TY3B-I PE=1 SV=2
TRINITY_DN5671_c0_g1_i5	0	1.19	0	0	0	0	0	0	1.59	2	0	0	1.21	2.25	0	1.17	0	0	1.29	0	1.46	0	1.2	3.54	0	0	1	0	0	0	0		YI31B	YEASTTransposon Ty3-I Gag-Pol polyprotein OS=Saccharomyces cerevisiae (strain ATCC 204508 / S288c) OX=559292 GN=TY3B-I PE=1 SV=2
TRINITY_DN30402_c0_g1_i7	0	0	0	0	0	0	0	0	0	0	0	0	0	0	0	0	5.09	0	0	0	0	12.58	0	0	3.96	0	0	0	0	3.68	0		YI31B	YEASTTransposon Ty3-I Gag-Pol polyprotein OS=Saccharomyces cerevisiae (strain ATCC 204508 / S288c) OX=559292 GN=TY3B-I PE=1 SV=2
TRINITY_DN9363_c0_g1_i6	0	0	0	0	0	0	0	3	0	0	0	2	2.39	6	0	3.78	0	3	17.07	2.01	1	3.22	2.49	6.7	2.25	1	2	2.5	1	0	0		YI31B	YEASTTransposon Ty3-I Gag-Pol polyprotein OS=Saccharomyces cerevisiae (strain ATCC 204508 / S288c) OX=559292 GN=TY3B-I PE=1 SV=2
TRINITY_DN6790_c0_g2_i2	0	7.29	10.82	0	0	0	0	0	1	0	0	0	13.74	0	0	0	0	0	8.31	0	0	0	3	3.12	3.28	0	0	0	0	0	0		YI31B	YEASTTransposon Ty3-I Gag-Pol polyprotein OS=Saccharomyces cerevisiae (strain ATCC 204508 / S288c) OX=559292 GN=TY3B-I PE=1 SV=2
TRINITY_DN23358_c0_g1_i6	0	0	0	0	0	0	0	0	0	0	0	0	0	0	0	0	0	0	0	0	0	0	0.73	0	0	0	0	0	0	0	0		YI31B	YEASTTransposon Ty3-I Gag-Pol polyprotein OS=Saccharomyces cerevisiae (strain ATCC 204508 / S288c) OX=559292 GN=TY3B-I PE=1 SV=2
TRINITY_DN29612_c0_g1_i1	0	2	0	0	0	0	0	0	0	0	0	0	0	0	0	2	0	0	0	0	0	0	0	3	0	0	2	0	0	0	1		YI31B	YEASTTransposon Ty3-I Gag-Pol polyprotein OS=Saccharomyces cerevisiae (strain ATCC 204508 / S288c) OX=559292 GN=TY3B-I PE=1 SV=2
TRINITY_DN128510_c0_g1_i1	0	0	0	0	0	0	0	0	0	0	0	0	0	0	2	0	0	0	0	0	0	0	0	0	0	0	0	0	0	0	0		YI31B	YEASTTransposon Ty3-I Gag-Pol polyprotein OS=Saccharomyces cerevisiae (strain ATCC 204508 / S288c) OX=559292 GN=TY3B-I PE=1 SV=2
TRINITY_DN48285_c0_g1_i9	0	0	0	0	0	0	0	0	7	2.69	0	0	0	0	0	0	1	0	2.25	0	0	0	0	0	3	0	0	5	0	19.54	3.72		YI31B	YEASTTransposon Ty3-I Gag-Pol polyprotein OS=Saccharomyces cerevisiae (strain ATCC 204508 / S288c) OX=559292 GN=TY3B-I PE=1 SV=2
TRINITY_DN165_c1_g1_i10	0	0	0	9.01	0	0	0	6.75	43.61	0	9	0	41.18	17.27	0	0	12.01	15.9	130.71	33.68	50.24	0	34.93	0	0	0	0	0	23.04	0	0		YI31B	YEASTTransposon Ty3-I Gag-Pol polyprotein OS=Saccharomyces cerevisiae (strain ATCC 204508 / S288c) OX=559292 GN=TY3B-I PE=1 SV=2
TRINITY_DN87495_c0_g1_i1	0	0	0	0	0	0	0	0	0	0	0	0	0	1	0	0	0	0	0	0	0	0	0	0	0	0	0	0	0	0	0		YI31B	YEASTTransposon Ty3-I Gag-Pol polyprotein OS=Saccharomyces cerevisiae (strain ATCC 204508 / S288c) OX=559292 GN=TY3B-I PE=1 SV=2
TRINITY_DN15623_c0_g1_i24	1	0	0	0	1.35	2.21	0	0	0	0	0	0	1.46	0	0	0	0	0	0	0	0	0	0	1	2.39	1	4	1.83	1.66	1	0		YI31B	YEASTTransposon Ty3-I Gag-Pol polyprotein OS=Saccharomyces cerevisiae (strain ATCC 204508 / S288c) OX=559292 GN=TY3B-I PE=1 SV=2
TRINITY_DN20728_c0_g1_i4	2	0	1	0	1.64	0	1.37	1	0	0	3.15	0	3.82	1	0	0	0	0	1.41	2	0	0	0	2.54	0	0	0	0	0	0.37	1.53		YI31B	YEASTTransposon Ty3-I Gag-Pol polyprotein OS=Saccharomyces cerevisiae (strain ATCC 204508 / S288c) OX=559292 GN=TY3B-I PE=1 SV=2
TRINITY_DN28626_c1_g2_i2	0	10	22	4	9	0	0	0	18.86	2	0	3.8	3.53	16	0	0	0	1	6.22	0	0	40	0	3.09	0	25	19	7.54	3	0	13.09		YI31B	YEASTTransposon Ty3-I Gag-Pol polyprotein OS=Saccharomyces cerevisiae (strain ATCC 204508 / S288c) OX=559292 GN=TY3B-I PE=1 SV=2
TRINITY_DN38332_c0_g5_i1	0	0	1	0	0	0	0	0	0	0	1	0	0	0	0	0	0	0	0	2	0	0	1	0	0	1	0	0	0	0	0		YI31B	YEASTTransposon Ty3-I Gag-Pol polyprotein OS=Saccharomyces cerevisiae (strain ATCC 204508 / S288c) OX=559292 GN=TY3B-I PE=1 SV=2
TRINITY_DN165_c1_g1_i13	0	19.33	0	0	0	0	0	0	0	6.9	0	0	0	0	0	284.78	0	0	0	0	7.85	0	0	124.59	0	0	0	0	0	0	29.33		YI31B	YEASTTransposon Ty3-I Gag-Pol polyprotein OS=Saccharomyces cerevisiae (strain ATCC 204508 / S288c) OX=559292 GN=TY3B-I PE=1 SV=2
TRINITY_DN64842_c0_g1_i1	0	0	0	0	0	0	0	0	0	0	0	0	0	0	3	0	0	0	0	0	0	0	0	0	0	0	0	0	0	0	0		YI31B	YEASTTransposon Ty3-I Gag-Pol polyprotein OS=Saccharomyces cerevisiae (strain ATCC 204508 / S288c) OX=559292 GN=TY3B-I PE=1 SV=2
TRINITY_DN3869_c1_g1_i1	0	0	0	0	0	0	0	0	0	0	0	0	0	0	0	0	0	0	0	0	0	0	2	0	0	0	0	0	0	0	0		YI31B	YEASTTransposon Ty3-I Gag-Pol polyprotein OS=Saccharomyces cerevisiae (strain ATCC 204508 / S288c) OX=559292 GN=TY3B-I PE=1 SV=2
TRINITY_DN30402_c0_g1_i4	0	3	0	5.39	6	5.09	0	0	2.89	0	5.42	5.36	21.89	5.39	0	0	0	0	0	9	0	1.92	3.68	14.14	2.52	4.6	4	10.82	0	0	5.02		YI31B	YEASTTransposon Ty3-I Gag-Pol polyprotein OS=Saccharomyces cerevisiae (strain ATCC 204508 / S288c) OX=559292 GN=TY3B-I PE=1 SV=2
TRINITY_DN40552_c0_g2_i1	26.93	1.09	16.37	1.29	1.14	36.06	3.62	5.71	23.08	2.29	9.71	0	19.17	4.61	0	16.97	4.01	3.28	49.66	14.27	14.22	73.12	0	7.07	29.36	28.5	15.93	27.19	35.57	5.59	14.23		YI31B	YEASTTransposon Ty3-I Gag-Pol polyprotein OS=Saccharomyces cerevisiae (strain ATCC 204508 / S288c) OX=559292 GN=TY3B-I PE=1 SV=2
TRINITY_DN165_c1_g1_i14	0	13.16	30.19	0	0	11.5	19.49	21.01	53.16	0	0	0	6.71	38.62	0	157.88	0	0	134.96	150.1	43.79	77.08	36.49	170.83	0	9.91	9.7	0	27.66	22.49	0		YI31B	YEASTTransposon Ty3-I Gag-Pol polyprotein OS=Saccharomyces cerevisiae (strain ATCC 204508 / S288c) OX=559292 GN=TY3B-I PE=1 SV=2
TRINITY_DN165_c1_g1_i33	0	0	0	0	0	58.06	30.49	63.72	75.61	0	0	0	40.12	138.19	11.36	62.19	20.45	3.07	28.48	46.98	76.69	55.46	113.62	0	35.88	15.35	13.36	26.21	66.31	9.7	11.66		YI31B	YEASTTransposon Ty3-I Gag-Pol polyprotein OS=Saccharomyces cerevisiae (strain ATCC 204508 / S288c) OX=559292 GN=TY3B-I PE=1 SV=2
TRINITY_DN2861_c0_g1_i27	0	0	3.2	0	0	0	0	0	0	0	0	0	49.98	0	0	42.28	0	0	1.1	5.75	0	7.61	0	0	3.47	2.27	0	1	0	0	0.21		YI31B	YEASTTransposon Ty3-I Gag-Pol polyprotein OS=Saccharomyces cerevisiae (strain ATCC 204508 / S288c) OX=559292 GN=TY3B-I PE=1 SV=2
TRINITY_DN6790_c0_g2_i1	2.89	0	0	10.74	0	8.74	15.93	1.77	0	4.53	3.19	4.24	2.82	8.02	0	3.51	0	2	0	3	0	0	0	0	0	2.77	9.88	9.97	1.26	1.53	4.59		YI31B	YEASTTransposon Ty3-I Gag-Pol polyprotein OS=Saccharomyces cerevisiae (strain ATCC 204508 / S288c) OX=559292 GN=TY3B-I PE=1 SV=2
TRINITY_DN42685_c0_g2_i4	0	0	0	0.6	0	0	0	0	0	0	0	1	0	1.36	0	0	0	0	0	0	0	0	3.76	0	0	0	0	0	0	0	0		YHOE	SCHPOUncharacterized acyltransferase C428.14 OS=Schizosaccharomyces pombe (strain 972 / ATCC 24843) OX=284812 GN=SPBC428.14 PE=3 SV=1
TRINITY_DN42685_c0_g2_i5	0	1.11	0	3.18	0	0	0.93	1.77	0	0	2.06	0	0	0	0	0	0	0	0	0	0	0.74	0	0	0	0	1.54	0	0	0	0		YHOE	SCHPOUncharacterized acyltransferase C428.14 OS=Schizosaccharomyces pombe (strain 972 / ATCC 24843) OX=284812 GN=SPBC428.14 PE=3 SV=1
TRINITY_DN30_c8_g1_i1	0	0	0	0	0	0	0	0	0	0	0	0	0	0	128	0	0	0	0	0	0	0	0	0	0	0	0	0	0	0	0		YHKF	SCHPOUncharacterized RNA-binding protein C660.15 OS=Schizosaccharomyces pombe (strain 972 / ATCC 24843) OX=284812 GN=SPBC660.15 PE=4 SV=1
TRINITY_DN41911_c0_g1_i3	0	0	0	0	0	0	0	0	0	0	0	0	0	0	7.4	0	0	0	0	0	0	0	0	0	0	0	0	0	0	0	0		YHKF	SCHPOUncharacterized RNA-binding protein C660.15 OS=Schizosaccharomyces pombe (strain 972 / ATCC 24843) OX=284812 GN=SPBC660.15 PE=4 SV=1
TRINITY_DN41911_c0_g1_i1	0	0	0	0	0	0	0	0	0	0	0	0	0	0	13.31	0	0	0	0	0	0	0	0	0	0	0	0	0	0	0	0		YHKF	SCHPOUncharacterized RNA-binding protein C660.15 OS=Schizosaccharomyces pombe (strain 972 / ATCC 24843) OX=284812 GN=SPBC660.15 PE=4 SV=1
TRINITY_DN41911_c0_g1_i2	0	0	0	0	0	0	0	0	0	0	0	0	0	0	16.29	0	0	0	0	0	0	0	0	0	0	0	0	0	0	0	0		YHKF	SCHPOUncharacterized RNA-binding protein C660.15 OS=Schizosaccharomyces pombe (strain 972 / ATCC 24843) OX=284812 GN=SPBC660.15 PE=4 SV=1
TRINITY_DN113089_c0_g1_i1	0	0	0	0	0	0	0	0	0	0	0	0	0	0	12	0	0	0	0	0	0	0	0	0	0	0	0	0	0	0	0		YHKF	SCHPOUncharacterized RNA-binding protein C660.15 OS=Schizosaccharomyces pombe (strain 972 / ATCC 24843) OX=284812 GN=SPBC660.15 PE=4 SV=1
TRINITY_DN136981_c0_g1_i1	0	0	0	0	0	0	0	1	0	0	0	0	0	0	0	0	0	0	0	0	0	0	0	0	0	0	0	0	0	0	0		YHJP	BACSUUncharacterized protein YhjP OS=Bacillus subtilis (strain 168) OX=224308 GN=yhjP PE=3 SV=1
TRINITY_DN121810_c0_g1_i1	0	0	0	0	0	0	0	1	0	1	0	0	2	0	0	0	0	0	0	0	0	0	0	0	0	0	0	0	0	0	0		YHJ2	SCHPOUncharacterized sulfatase PB10D8.02c OS=Schizosaccharomyces pombe (strain 972 / ATCC 24843) OX=284812 GN=SPBPB10D8.02c PE=3 SV=1
TRINITY_DN114751_c0_g1_i1	0	0	0	0	0	0	0	0	0	0	0	0	0	0	1	0	0	0	0	0	0	0	0	0	0	0	0	0	0	0	0		YHHT	ECO57Putative transport protein YhhT OS=Escherichia coli O157:H7 OX=83334 GN=yhhT PE=3 SV=1
TRINITY_DN85732_c0_g1_i1	0	0	0	0	0	0	0	0	1	0	0	0	0	0	0	0	0	0	0	0	0	1	0	0	0	0	0	0	0	0	0		YHGF	ECOLIProtein YhgF OS=Escherichia coli (strain K12) OX=83333 GN=yhgF PE=1 SV=3
TRINITY_DN98489_c0_g1_i1	0	0	0	0	1	0	1	0	0	0	0	0	0	0	0	0	0	0	0	0	0	0	1	0	0	0	0	0	0	0	0		YHFA	ECO57Protein YhfA OS=Escherichia coli O157:H7 OX=83334 GN=yhfA PE=4 SV=1
TRINITY_DN138606_c0_g1_i1	0	1	0	1	0	1	0	0	0	0	0	0	0	0	0	0	0	0	0	0	0	0	0	0	0	0	0	0	0	0	0		YHES	ECO57Uncharacterized ABC transporter ATP-binding protein YheS OS=Escherichia coli O157:H7 OX=83334 GN=yheS PE=3 SV=1
TRINITY_DN126731_c0_g1_i1	0	0	0	0	0	0	0	1	0	0	0	0	0	1	0	0	0	0	0	1	0	0	1	0	0	0	0	0	0	0	0		YHEO	ECOL6Uncharacterized protein YheO OS=Escherichia coli O6:H1 (strain CFT073 / ATCC 700928 / UPEC) OX=199310 GN=yheO PE=4 SV=1
TRINITY_DN81622_c0_g1_i1	0	0	2	0	0	0	0	0	0	0	0	0	0	0	0	0	0	0	0	0	0	0	0	0	0	0	0	0	0	0	0		YHE5	SCHPOPutative glutamine amidotransferase PB2B2.05 OS=Schizosaccharomyces pombe (strain 972 / ATCC 24843) OX=284812 GN=SPBPB2B2.05 PE=4 SV=2
TRINITY_DN65929_c0_g1_i1	1	0	0	0	0	0	0	0	0	0	0	0	0	0	1	0	0	0	0	0	0	0	0	0	0	0	0	0	0	0	0		YHDX	ECOLIPutative amino-acid ABC transporter permease protein YhdX OS=Escherichia coli (strain K12) OX=83333 GN=yhdX PE=3 SV=3
TRINITY_DN144222_c0_g1_i1	0	0	0	0	0	0	0	0	0	0	0	0	1	1	0	1	0	0	0	1	0	0	0	0	0	0	0	0	0	0	0		YHDX	ECOLIPutative amino-acid ABC transporter permease protein YhdX OS=Escherichia coli (strain K12) OX=83333 GN=yhdX PE=3 SV=3
TRINITY_DN130179_c0_g1_i1	1	1	0	0	0	0	0	0	0	0	0	0	0	0	0	0	0	0	0	0	0	0	0	0	0	0	0	0	0	0	0		YHDW	ECO57Putative amino-acid ABC transporter-binding protein YhdW OS=Escherichia coli O157:H7 OX=83334 GN=yhdW PE=3 SV=1
TRINITY_DN94561_c0_g1_i1	0	0	0	0	0	0	0	0	0	0	1	0	0	0	0	0	0	0	1	0	0	0	0	0	0	0	0	0	0	0	0		YHDW	ECO57Putative amino-acid ABC transporter-binding protein YhdW OS=Escherichia coli O157:H7 OX=83334 GN=yhdW PE=3 SV=1
TRINITY_DN130681_c0_g1_i1	0	2	0	0	0	0	0	0	0	0	0	0	0	0	0	0	0	0	0	0	0	0	0	2	0	0	0	0	0	0	0		YHDW	ECO57Putative amino-acid ABC transporter-binding protein YhdW OS=Escherichia coli O157:H7 OX=83334 GN=yhdW PE=3 SV=1
TRINITY_DN122778_c0_g1_i1	0	0	0	0	0	0	0	0	0	0	0	0	0	0	13	0	0	0	0	0	0	0	0	0	0	0	0	0	0	0	0		YHDG	BACSUUncharacterized amino acid permease YhdG OS=Bacillus subtilis (strain 168) OX=224308 GN=yhdG PE=2 SV=1
TRINITY_DN87247_c0_g1_i1	0	0	0	0	1	0	0	0	0	0	0	0	0	0	0	0	0	0	0	0	0	1	0	0	0	0	0	0	0	0	0		YHCV	BACSUCBS domain-containing protein YhcV OS=Bacillus subtilis (strain 168) OX=224308 GN=yhcV PE=4 SV=1
TRINITY_DN135841_c0_g1_i1	0	0	0	0	0	0	0	0	0	0	0	0	0	0	3	0	0	0	0	0	0	0	0	0	0	0	0	0	0	0	0		YHAI	ECO57Inner membrane protein YhaI OS=Escherichia coli O157:H7 OX=83334 GN=yhaI PE=3 SV=1
TRINITY_DN49333_c0_g1_i1	2	1	0	0	2	0	5	0	1	0	0	0	0	1	0	0	0	0	12	1	1	3	3	1	0	2	0	2	1	0	0		YHAA	BACSUPutative amidohydrolase YhaA OS=Bacillus subtilis (strain 168) OX=224308 GN=yhaA PE=3 SV=3
TRINITY_DN105655_c0_g1_i1	0	0	0	0	2	0	0	0	0	0	6	0	0	1	0	0	0	0	0	0	0	0	0	0	0	0	0	0	0	0	0		YH6B	SCHPOUncharacterized serine-rich protein P23A10.11c OS=Schizosaccharomyces pombe (strain 972 / ATCC 24843) OX=284812 GN=SPBP23A10.11c PE=2 SV=1
TRINITY_DN66691_c0_g1_i1	0	0	0	1	0	0	0	0	0	1	0	0	0	0	0	0	0	0	0	0	0	0	0	0	0	0	0	0	0	0	0		YH66	SCHPOUncharacterized mitochondrial carrier P23A10.06 OS=Schizosaccharomyces pombe (strain 972 / ATCC 24843) OX=284812 GN=SPBP23A10.06 PE=3 SV=1
TRINITY_DN17583_c0_g1_i70	0	0	0	0	0	0	0	0	0	0	0	0	0	0	0	0	0	0	0	0	0	0	0	0	0	3	0	0	0	0	2		YH010	MOUSEPutative IQ motif and ankyrin repeat domain-containing protein LOC642574 homolog OS=Mus musculus OX=10090 PE=5 SV=2
TRINITY_DN17583_c0_g1_i19	1	4	1	3	0	1	1	1	0	0	2	2	0	2	0	0	1	2	3	0	0	0	1	3	0	0	4	1	1	0	0		YH010	MOUSEPutative IQ motif and ankyrin repeat domain-containing protein LOC642574 homolog OS=Mus musculus OX=10090 PE=5 SV=2
TRINITY_DN17583_c0_g1_i47	5.21	9.01	8.91	0	0	1.26	0	0	13.49	9.29	0	4.17	9.65	0	0	0	0	0	0	0	0	0	8.97	0	0	0	0	23.86	0	13.6	1.79		YH010	HUMANPutative IQ motif and ankyrin repeat domain-containing protein LOC642574 OS=Homo sapiens OX=9606 PE=5 SV=2
TRINITY_DN17583_c0_g1_i32	23.06	14.26	6.86	41	27.04	44.09	22.88	28.49	0	0	25.39	21.79	107.08	23.38	2.43	28.5	21.04	11	36.65	55.6	42.59	54.6	3.79	30.05	41.66	48.46	38.18	18.14	17.81	0	6.02		YH010	HUMANPutative IQ motif and ankyrin repeat domain-containing protein LOC642574 OS=Homo sapiens OX=9606 PE=5 SV=2
TRINITY_DN83514_c0_g1_i1	0	0	0	0	0	0	0	0	0	0	0	0	0	0	3	0	0	0	0	0	0	0	0	0	0	0	0	0	0	0	0		YH010	HUMANPutative IQ motif and ankyrin repeat domain-containing protein LOC642574 OS=Homo sapiens OX=9606 PE=5 SV=2
TRINITY_DN17583_c0_g1_i11	0	0	0	0	1.96	0	0	0	0.04	0	0	4.42	0	0	0	0	0	0	0	0	1.72	0	0	0	0	3.51	0	0	1.36	0	1.4		YH010	HUMANPutative IQ motif and ankyrin repeat domain-containing protein LOC642574 OS=Homo sapiens OX=9606 PE=5 SV=2
TRINITY_DN17583_c0_g1_i42	3.73	0	2.98	0	0	0	0.86	8.51	0	0	6.42	0	8.26	17.74	0	0	2.78	0	5.35	0	8.69	0	0	0	0	11.37	0	0	12.96	0	0		YH010	HUMANPutative IQ motif and ankyrin repeat domain-containing protein LOC642574 OS=Homo sapiens OX=9606 PE=5 SV=2
TRINITY_DN17583_c0_g1_i25	0	3.73	0	0	0	0	4.25	0	0	0	3.19	0	0	0	1.57	0	9.16	0	0	2.19	0	0	0.25	0	6.61	0	7.82	0	0	2.4	0		YH010	HUMANPutative IQ motif and ankyrin repeat domain-containing protein LOC642574 OS=Homo sapiens OX=9606 PE=5 SV=2
TRINITY_DN17583_c0_g1_i22	0	0	0	0	0	0	0	0	0	0	0	0	0	0	0	0	0	0	0	0	0	11.24	24.01	23.95	0	0	0	0	0	0	0		YH010	HUMANPutative IQ motif and ankyrin repeat domain-containing protein LOC642574 OS=Homo sapiens OX=9606 PE=5 SV=2
TRINITY_DN17583_c0_g1_i92	0	0	34.24	0	0	16.65	0	0	10.46	12.71	0	1.62	0	17.88	0	8.5	0.02	0	0	2.21	0	7.15	19.98	0	10.73	15.67	0	0	6.87	0	0.8		YH010	HUMANPutative IQ motif and ankyrin repeat domain-containing protein LOC642574 OS=Homo sapiens OX=9606 PE=5 SV=2
TRINITY_DN135869_c0_g1_i1	0	0	0	0	0	0	0	0	0	0	0	0	8	3	0	0	0	0	0	0	0	1	0	0	0	0	0	0	0	0	0		YGXB	BACSUUncharacterized protein YgxB OS=Bacillus subtilis (strain 168) OX=224308 GN=ygxB PE=4 SV=2
TRINITY_DN108675_c0_g1_i1	0	0	0	0	0	0	0	0	0	0	0	0	0	0	4	0	0	0	0	0	0	0	0	0	0	0	0	0	0	0	0		YGWC	SCHPOProbable transcriptional regulatory protein C8D2.12c OS=Schizosaccharomyces pombe (strain 972 / ATCC 24843) OX=284812 GN=pi053 PE=3 SV=2
TRINITY_DN5683_c0_g1_i2	3.47	2.31	1.8	1.15	2.36	2.26	0	0	1	0	0	0	5.73	1.33	0	1.13	0	0	0	3.16	1.25	0	0	2.68	0	1.24	3.27	0	1.49	1	0		YGR4	SCHPOUncharacterized RNA-binding protein C365.04c OS=Schizosaccharomyces pombe (strain 972 / ATCC 24843) OX=284812 GN=SPBC365.04c PE=4 SV=1
TRINITY_DN5683_c0_g1_i1	0	0	0	0	0	0	0	0	0	7.61	0	0	0	0	0	0	0	0	0	0	0	0	0	4.43	0	0	4.56	0	9.25	0	0		YGR4	SCHPOUncharacterized RNA-binding protein C365.04c OS=Schizosaccharomyces pombe (strain 972 / ATCC 24843) OX=284812 GN=SPBC365.04c PE=4 SV=1
TRINITY_DN5683_c0_g1_i3	7.74	8.15	0	4.6	10.64	5.66	0	3.63	2.71	0	7.9	0	12.54	18.67	0	5.65	7.44	1	9	10.06	8.75	5.68	5.59	9.34	10	0	5.17	8.98	0.25	5	1		YGR4	SCHPOUncharacterized RNA-binding protein C365.04c OS=Schizosaccharomyces pombe (strain 972 / ATCC 24843) OX=284812 GN=SPBC365.04c PE=4 SV=1
TRINITY_DN87534_c0_g1_i1	0	0	0	0	2	0	0	0	0	0	0	0	0	0	0	0	0	0	0	0	0	0	0	0	0	0	0	0	0	0	0		YGR4	SCHPOUncharacterized RNA-binding protein C365.04c OS=Schizosaccharomyces pombe (strain 972 / ATCC 24843) OX=284812 GN=SPBC365.04c PE=4 SV=1
TRINITY_DN5683_c0_g1_i4	5.79	1.54	8.2	3.26	0	1.08	7	1.37	2.29	2.39	2.1	8	2.74	0	0	3.23	5.56	0	0	1.78	0	4.32	2.41	2.56	0	6.76	0	5.02	0	1	1		YGR4	SCHPOUncharacterized RNA-binding protein C365.04c OS=Schizosaccharomyces pombe (strain 972 / ATCC 24843) OX=284812 GN=SPBC365.04c PE=4 SV=1
TRINITY_DN85_c0_g3_i1	4.64	0	5.6	0	0	3.19	1.5	3.95	9.14	6.85	0.61	0	13.16	6.88	1.22	0	4.1	2.34	16.79	4.76	1.25	3.28	7.32	7.58	7.86	0	10.4	0	4.43	2	0.9		YGM4	SCHPOHMG box-containing protein C19G7.04 OS=Schizosaccharomyces pombe (strain 972 / ATCC 24843) OX=284812 GN=SPBC19G7.04 PE=4 SV=2
TRINITY_DN130694_c0_g1_i1	0	0	0	0	0	0	0	0	0	0	2	0	0	0	0	0	0	0	0	0	0	0	0	0	0	0	0	0	0	0	0		YGL4	YEASTPutative oligopeptide transporter YGL114W OS=Saccharomyces cerevisiae (strain ATCC 204508 / S288c) OX=559292 GN=YGL114W PE=1 SV=1
TRINITY_DN111913_c0_g1_i1	0	0	0	0	0	0	0	0	0	0	0	2	0	0	0	0	0	0	0	0	0	0	0	0	0	0	0	0	0	0	0		YGHX	ECOLIPutative hydrolase fragment YghX OS=Escherichia coli (strain K12) OX=83333 GN=yghX PE=5 SV=4
TRINITY_DN98193_c0_g1_i1	0	0	1	0	1	0	0	0	0	0	0	0	0	0	0	0	0	0	0	0	0	0	0	0	0	0	0	0	0	0	0		YGHU	ECOLIDisulfide-bond oxidoreductase YghU OS=Escherichia coli (strain K12) OX=83333 GN=yghU PE=1 SV=2
TRINITY_DN86842_c0_g1_i1	0	0	0	0	0	0	0	0	0	0	0	0	0	0	0	0	0	0	1	0	0	0	0	0	0	0	0	0	0	0	0		YGHU	ECOLIDisulfide-bond oxidoreductase YghU OS=Escherichia coli (strain K12) OX=83333 GN=yghU PE=1 SV=2
TRINITY_DN44765_c0_g1_i1	0	1	0	0	0	1	2	0	0	0	0	0	0	1	0	0	2	0	0	0	0	0	0	0	0	0	0	0	0	0	0		YGHO	ECOLIProtein YghO OS=Escherichia coli (strain K12) OX=83333 GN=yghO PE=2 SV=3
TRINITY_DN125837_c0_g1_i1	0	0	0	0	0	0	0	0	0	0	0	0	0	0	0	0	0	0	0	0	0	0	0	0	0	0	0	1	0	0	0		YGGC	ECOLIUncharacterized protein YggC OS=Escherichia coli (strain K12) OX=83333 GN=yggC PE=4 SV=2
TRINITY_DN139481_c0_g1_i1	0	0	0	0	0	0	0	0	0	0	0	0	0	0	2	0	0	0	0	0	0	0	0	0	0	0	0	0	0	0	0		YGFZ	HAMD5tRNA-modifying protein YgfZ OS=Hamiltonella defensa subsp. Acyrthosiphon pisum (strain 5AT) OX=572265 GN=HDEF	2079 PE=3 SV=1
TRINITY_DN67467_c0_g1_i1	0	0	0	0	0	1	0	0	0	0	0	0	0	0	0	0	0	0	0	0	0	0	0	0	0	0	0	0	0	0	0		YGEA	ECO57L-aspartate/glutamate-specific racemase OS=Escherichia coli O157:H7 OX=83334 GN=ygeA PE=1 SV=1
TRINITY_DN109134_c0_g1_i1	0	0	0	0	0	0	0	0	0	0	0	0	0	0	4	0	0	0	0	0	0	0	0	0	0	0	0	0	0	0	0		YGD9	YEASTPutative uncharacterized oxidoreductase YGL039W OS=Saccharomyces cerevisiae (strain ATCC 204508 / S288c) OX=559292 GN=YGL039W PE=1 SV=1
TRINITY_DN80617_c0_g1_i1	0	0	0	0	0	0	0	0	0	0	0	0	0	0	2	0	0	0	0	0	0	0	0	0	0	0	0	0	0	0	0		YGD3	SCHPOUncharacterized aminotransferase C1771.03c OS=Schizosaccharomyces pombe (strain 972 / ATCC 24843) OX=284812 GN=SPBC1773.03c PE=3 SV=1
TRINITY_DN33668_c0_g1_i1	0	0	0	0	0	0	0	0	0	0	0	0	0	0	12	0	0	0	0	0	0	0	0	0	0	0	0	0	0	0	0		YGB7	CUPNEUPF0065 protein in gbd 5'region OS=Cupriavidus necator OX=106590 PE=3 SV=1
TRINITY_DN146644_c0_g1_i1	2	0	0	0	0	0	0	0	0	0	0	0	0	0	0	0	0	0	0	0	0	0	0	0	0	0	0	0	0	0	0		YGB7	CUPNEUPF0065 protein in gbd 5'region OS=Cupriavidus necator OX=106590 PE=3 SV=1
TRINITY_DN10400_c0_g1_i2	0	0	0	0	7.01	0	4.05	0	0	6.01	0	0	0	0	0	0	2.87	1	0	0	0	0	0	0	0	0	0	0	12.1	1.12	0		YGAK	BACSUUncharacterized FAD-linked oxidoreductase YgaK OS=Bacillus subtilis (strain 168) OX=224308 GN=ygaK PE=3 SV=4
TRINITY_DN10400_c0_g1_i5	0.13	5	6.79	2.62	6.99	0.16	0.08	0	0	5.99	7.95	0	16.15	0	0	4.4	9.25	0	0	0.15	0	20.63	0	24.26	4.82	0	0	6.43	0	0	0		YGAK	BACSUUncharacterized FAD-linked oxidoreductase YgaK OS=Bacillus subtilis (strain 168) OX=224308 GN=ygaK PE=3 SV=4
TRINITY_DN10400_c0_g1_i6	8	0	10.21	18.38	0	8.57	4.05	0	16	6.01	0	15	0	32	0	22.6	2.87	1	34	7.85	0	0	8.06	0	24.18	29.24	22.82	0	12.1	1.12	0		YGAK	BACSUUncharacterized FAD-linked oxidoreductase YgaK OS=Bacillus subtilis (strain 168) OX=224308 GN=ygaK PE=3 SV=4
TRINITY_DN10400_c0_g1_i7	9.87	0	0	0	0	8.27	2.82	9	0	0	7.05	0	8.85	0	2	0	0	0	0	0	12	7.37	16.94	13.74	0	10.76	9.18	28.57	0.8	2.76	10		YGAK	BACSUUncharacterized FAD-linked oxidoreductase YgaK OS=Bacillus subtilis (strain 168) OX=224308 GN=ygaK PE=3 SV=4
TRINITY_DN128360_c0_g1_i1	0	1	0	2	0	1	0	0	0	0	0	0	0	0	0	0	0	0	0	0	0	0	0	0	0	0	0	0	0	0	0		YGAJ	BACSUUncharacterized peptidase YgaJ OS=Bacillus subtilis (strain 168) OX=224308 GN=ygaJ PE=3 SV=2
TRINITY_DN2639_c0_g2_i4	0	0	0	3.23	1.08	0	0	1	3	1	3	4	5.07	1	0	0	2.8	0	0	3.22	1	0	3.67	3	0	1.33	0	0	0	1	2.01		YG31B	YEASTTransposon Ty3-G Gag-Pol polyprotein OS=Saccharomyces cerevisiae (strain ATCC 204508 / S288c) OX=559292 GN=TY3B-G PE=1 SV=3
TRINITY_DN2639_c0_g2_i3	3	0	0	0	0	20	2	0	0	0	0	0	2.25	0	0	2	38.2	1	256	0	0	1	138.33	0	1	2.67	0	2	0	1	0.04		YG31B	YEASTTransposon Ty3-G Gag-Pol polyprotein OS=Saccharomyces cerevisiae (strain ATCC 204508 / S288c) OX=559292 GN=TY3B-G PE=1 SV=3
TRINITY_DN6159_c0_g1_i4	0	0	0	0	0	0	0	0	0	0	0	0	0	19.42	0	0	0	0	0	0	0	0	0	0	0	0	0	0	0	0	0		YG31B	YEASTTransposon Ty3-G Gag-Pol polyprotein OS=Saccharomyces cerevisiae (strain ATCC 204508 / S288c) OX=559292 GN=TY3B-G PE=1 SV=3
TRINITY_DN14863_c1_g2_i3	3	1	0	0	0	0	0	0	0	0	0	0	7.91	0	0	0	0	0	1	0	0	0	0	2	0	0	0	0	1.27	0	0		YG31B	YEASTTransposon Ty3-G Gag-Pol polyprotein OS=Saccharomyces cerevisiae (strain ATCC 204508 / S288c) OX=559292 GN=TY3B-G PE=1 SV=3
TRINITY_DN5671_c0_g1_i12	0	0	3.77	0	2.22	0	0	0	9.65	0	2.64	2.24	0	16.63	0	0	0	0	15.62	0	5.11	0	0	0	0	0	6.4	0	0	0	0		YG31B	YEASTTransposon Ty3-G Gag-Pol polyprotein OS=Saccharomyces cerevisiae (strain ATCC 204508 / S288c) OX=559292 GN=TY3B-G PE=1 SV=3
TRINITY_DN6159_c0_g1_i7	0	27	0	0	0	0	0	0	14.78	0	0	13.29	0	44.24	0	0	10.77	0	0	14.11	0	10.55	0	0	0	0	0	0	20.08	0	0		YG31B	YEASTTransposon Ty3-G Gag-Pol polyprotein OS=Saccharomyces cerevisiae (strain ATCC 204508 / S288c) OX=559292 GN=TY3B-G PE=1 SV=3
TRINITY_DN29124_c0_g1_i15	1	0	0	1	0	0	155.4	0	0	0	0	0	0	2	0	0	0	0	0	0	0	0	0	0	2	0	0	0	0	1	8		YG31B	YEASTTransposon Ty3-G Gag-Pol polyprotein OS=Saccharomyces cerevisiae (strain ATCC 204508 / S288c) OX=559292 GN=TY3B-G PE=1 SV=3
TRINITY_DN5671_c0_g1_i21	0	3.11	0	0	0	4.5	0	20.91	0	0	0	0	31.34	28.22	0	112.4	0	0	14.72	43.42	16.66	14.8	25.6	42.2	5.92	0	0	4.14	12.37	6.26	10.36		YG31B	YEASTTransposon Ty3-G Gag-Pol polyprotein OS=Saccharomyces cerevisiae (strain ATCC 204508 / S288c) OX=559292 GN=TY3B-G PE=1 SV=3
TRINITY_DN6569_c0_g1_i8	20.22	17.47	12	7.79	8	9	17.83	9	7.78	2.27	5.4	2.33	20.52	13.42	1.21	7.53	6.92	1	11.24	7.97	4.32	16.64	13.72	21.04	20.39	15.03	12.53	14.76	10.24	3.22	6.48		YG31B	YEASTTransposon Ty3-G Gag-Pol polyprotein OS=Saccharomyces cerevisiae (strain ATCC 204508 / S288c) OX=559292 GN=TY3B-G PE=1 SV=3
TRINITY_DN6159_c0_g1_i13	11.54	0	8.22	0	21	20.86	0	0	0	19	7.65	15.71	0	0	1	17.43	16.03	6	0	0	0	0	47.79	0	0	0	25.1	22.35	50.1	50.28	0		YG31B	YEASTTransposon Ty3-G Gag-Pol polyprotein OS=Saccharomyces cerevisiae (strain ATCC 204508 / S288c) OX=559292 GN=TY3B-G PE=1 SV=3
TRINITY_DN10827_c0_g1_i42	0	1.5	0	1	0	1	0	0	0	0	2	0	7.68	6.67	0	1	0	0	0	2.59	0	0	0	7.14	3	0	0	7.73	0	0	0		YG31B	YEASTTransposon Ty3-G Gag-Pol polyprotein OS=Saccharomyces cerevisiae (strain ATCC 204508 / S288c) OX=559292 GN=TY3B-G PE=1 SV=3
TRINITY_DN6159_c0_g1_i14	0	0	36.78	38	0	0	45.04	33	22.99	0	18.35	0	90.27	0	0	27.57	0	0	51	31.89	0	35.45	0	86	53	51	65.16	31.53	0	0	42.73		YG31B	YEASTTransposon Ty3-G Gag-Pol polyprotein OS=Saccharomyces cerevisiae (strain ATCC 204508 / S288c) OX=559292 GN=TY3B-G PE=1 SV=3
TRINITY_DN127637_c0_g1_i1	0	0	0	0	0	0	0	0	0	0	0	0	0	0	2	0	0	0	0	0	0	0	0	0	0	0	0	0	0	0	0		YFMJ	BACSUPutative NADP-dependent oxidoreductase YfmJ OS=Bacillus subtilis (strain 168) OX=224308 GN=yfmJ PE=2 SV=1
TRINITY_DN2025_c0_g1_i1	1	3	0	5	4	3	2	0	1	0	4	2	0	3	1	1	0	0	6	8	2	0	2	3	5	0	1	4	12	0	0		YFMJ	BACSUPutative NADP-dependent oxidoreductase YfmJ OS=Bacillus subtilis (strain 168) OX=224308 GN=yfmJ PE=2 SV=1
TRINITY_DN11848_c0_g1_i5	0.5	0	0	0	0	3	0	0	1.23	0	3	0	10	0	0	2	0	1	1.61	2	0	5	1.9	0	5	0	0.97	2	4.25	0	0		YFLP	BACSUUPF0065 protein YflP OS=Bacillus subtilis (strain 168) OX=224308 GN=yflP PE=3 SV=2
TRINITY_DN11848_c0_g1_i1	0	2	1.2	2	1	0	9	2.55	0	2	0	0	0	5	0	0	3	0	0.39	0	0	0	4.15	13	0	0.5	4.02	0	6.56	0	0		YFLP	BACSUUPF0065 protein YflP OS=Bacillus subtilis (strain 168) OX=224308 GN=yflP PE=3 SV=2
TRINITY_DN38933_c0_g1_i1	1	0.58	0	0	0	0	2	0	0	0	0	0	0	0	0	0	0	0	0	0	0	0	0	0	0	0	0	0	0	0	0		YFLP	BACSUUPF0065 protein YflP OS=Bacillus subtilis (strain 168) OX=224308 GN=yflP PE=3 SV=2
TRINITY_DN11848_c0_g1_i4	0.5	0	2.39	0	0	0	0	2.45	1.23	0	0	6	0	0	0	0	0	0	0	0	0	0	1.95	0	0	0	0.99	0	0	0	0		YFLP	BACSUUPF0065 protein YflP OS=Bacillus subtilis (strain 168) OX=224308 GN=yflP PE=3 SV=2
TRINITY_DN90224_c0_g1_i1	1	0	0	0	0	0	0	0	0	0	0	0	0	0	1	2	0	0	0	0	0	0	0	0	0	0	0	0	0	0	0		YFLP	BACSUUPF0065 protein YflP OS=Bacillus subtilis (strain 168) OX=224308 GN=yflP PE=3 SV=2
TRINITY_DN38933_c0_g1_i2	2	2.42	2	3	1	0	0	0	0	0	1	0	0	0	0	0	0	0	0	0	0	0	0	0	0	0	0	0	0	0	0		YFLP	BACSUUPF0065 protein YflP OS=Bacillus subtilis (strain 168) OX=224308 GN=yflP PE=3 SV=2
TRINITY_DN11848_c0_g1_i3	0	0	2.41	2	0	0	0	0	2.55	0	0	0	0	0	0	0	0	0	0	0	0	0	0	0	0	0.5	4.02	0	2.19	0	0		YFLP	BACSUUPF0065 protein YflP OS=Bacillus subtilis (strain 168) OX=224308 GN=yflP PE=3 SV=2
TRINITY_DN62299_c0_g1_i1	0	2	1	0	4	0	0	0	1	0	0	0	0	0	0	0	0	0	0	1	0	0	0	0	0	0	0	0	0	0	0		YFLP	BACSUUPF0065 protein YflP OS=Bacillus subtilis (strain 168) OX=224308 GN=yflP PE=3 SV=2
TRINITY_DN76841_c0_g1_i1	0	0	0	0	0	0	0	0	0	0	0	0	0	0	3	0	0	0	0	0	0	0	0	0	0	0	0	0	0	0	0		YFKJ	BACSULow molecular weight protein-tyrosine-phosphatase YfkJ OS=Bacillus subtilis (strain 168) OX=224308 GN=yfkJ PE=1 SV=1
TRINITY_DN86330_c0_g1_i1	0	0	0	0	0	0	0	0	0	0	0	0	0	0	5	0	0	0	0	0	0	0	0	0	0	0	0	0	0	0	0		YFK7	SCHPOProbable E3 ubiquitin protein ligase C167.07c OS=Schizosaccharomyces pombe (strain 972 / ATCC 24843) OX=284812 GN=SPAC167.07c PE=2 SV=1
TRINITY_DN72557_c0_g1_i1	0	0	0	0	0	0	0	0	0	0	0	0	0	0	2	0	0	0	0	0	0	0	0	0	0	0	0	0	0	0	0		YFJP	ECOLIUncharacterized protein YfjP OS=Escherichia coli (strain K12) OX=83333 GN=yfjP PE=4 SV=4
TRINITY_DN15599_c0_g1_i1	121	24	47	69	9	146	1	2	16	6	5	1	24	14	0	1	7	0	1	0	0	1	0	0	0	0	0	0	0	0	0		YFIA	ECO57Ribosome-associated factor Y OS=Escherichia coli O157:H7 OX=83334 GN=yfiA PE=3 SV=2
TRINITY_DN114635_c0_g1_i1	0	0	0	0	0	0	0	0	0	0	0	0	0	0	4	0	0	0	0	0	0	0	0	0	0	0	0	0	0	0	0		YFGM	ECOLIUPF0070 protein YfgM OS=Escherichia coli (strain K12) OX=83333 GN=yfgM PE=3 SV=1
TRINITY_DN7397_c1_g1_i9	1.96	18.47	22.15	20.52	32.44	5.47	2.77	4.99	11	0	8.26	12.91	13.43	19.45	0	21	1.73	0	18.63	11.19	14.56	7.76	10.57	0	8.24	5.07	4.09	3.35	12.11	0	0		YFEX	ECO57Dye-decolorizing peroxidase YfeX OS=Escherichia coli O157:H7 OX=83334 GN=yfeX PE=1 SV=2
TRINITY_DN7397_c1_g1_i25	215	25.48	89.31	507.59	195.38	90.28	147.38	28.41	0	8	170.27	138.82	154.37	243.34	2	153.61	17.05	4	51.24	37.81	0	61.56	269.36	6.45	44.2	26.93	27.22	10.63	36.35	0	1		YFEX	ECO57Dye-decolorizing peroxidase YfeX OS=Escherichia coli O157:H7 OX=83334 GN=yfeX PE=1 SV=2
TRINITY_DN7397_c1_g1_i18	9.43	9.04	8.88	4.64	0	5.94	8.85	1.6	0	0	12.18	5.53	4.64	8.32	0	0	0	0	0	0	0	0	11.19	5.29	0	0	0	0	4.34	0	0		YFEX	ECO57Dye-decolorizing peroxidase YfeX OS=Escherichia coli O157:H7 OX=83334 GN=yfeX PE=1 SV=2
TRINITY_DN7397_c1_g1_i26	1.61	0	0	9.26	8.18	0	0	0	3	0	3.3	0	7.57	4.58	0	2.41	2.22	0	5.14	0	2.44	2.68	0	1.26	2.56	0	2.69	4.01	19.68	0	0		YFEX	ECO57Dye-decolorizing peroxidase YfeX OS=Escherichia coli O157:H7 OX=83334 GN=yfeX PE=1 SV=2
TRINITY_DN7397_c1_g1_i6	0	0	10.66	0	0	12.31	0	0	0	0	0	11.74	0	9.31	0	28.99	0	0	0	0	0	0	21.87	0	0	0	0	0	18.52	0	0		YFEX	ECO57Dye-decolorizing peroxidase YfeX OS=Escherichia coli O157:H7 OX=83334 GN=yfeX PE=1 SV=2
TRINITY_DN60865_c0_g1_i1	0	0	0	0	0	0	0	0	0	4	0	0	0	0	0	0	0	0	0	0	0	0	0	0	0	0	0	0	0	0	0		YFEW	ECO57Putative D-alanyl-D-alanine carboxypeptidase OS=Escherichia coli O157:H7 OX=83334 GN=yfeW PE=3 SV=1
TRINITY_DN20799_c0_g1_i2	0	0	0	0	1	0	0	0	0	0	0	0	1	0	0	0	1	0	1	4	0	0	0	0	0	0	0	0	0	0	0		YFEN	ECOLIUncharacterized protein YfeN OS=Escherichia coli (strain K12) OX=83333 GN=yfeN PE=3 SV=1
TRINITY_DN20799_c0_g2_i1	0	0	0	0	0	0	0	2	2	0	0	0	0	1	0	0	0	0	0	0	2	1	4	0	0	0	0	0	0	0	0		YFEN	ECOLIUncharacterized protein YfeN OS=Escherichia coli (strain K12) OX=83333 GN=yfeN PE=3 SV=1
TRINITY_DN20799_c0_g1_i1	0	0	0	0	0	0	0	0	1	0	1	1	0	2	0	0	0	0	0	0	0	5	6	0	0	0	0	0	0	0	0		YFEN	ECOLIUncharacterized protein YfeN OS=Escherichia coli (strain K12) OX=83333 GN=yfeN PE=3 SV=1
TRINITY_DN20799_c0_g1_i3	0	0	0	0	0	0	0	0	0	0	0	0	0	0	0	0	0	0	1	0	0	0	2	0	0	0	0	0	0	0	0		YFEN	ECOLIUncharacterized protein YfeN OS=Escherichia coli (strain K12) OX=83333 GN=yfeN PE=3 SV=1
TRINITY_DN108894_c0_g1_i1	0	0	0	0	0	0	1	0	0	0	0	0	0	0	0	0	0	0	0	0	0	0	0	0	0	0	0	0	0	0	0		YFEB	YERPEChelated iron transport system membrane protein YfeB OS=Yersinia pestis OX=632 GN=yfeB PE=3 SV=1
TRINITY_DN6437_c0_g1_i1	30	46	74	70	32	53	33	45	46	50	36	32	98	44	1	27	15	4	16	28	17	23	17	36	15	27	27	31	25	6	14		YFE9	SCHPOUncharacterized exonuclease C637.09 OS=Schizosaccharomyces pombe (strain 972 / ATCC 24843) OX=284812 GN=SPAC637.09 PE=3 SV=2
TRINITY_DN49398_c0_g1_i1	0	0	0	0	0	0	0	0	0	0	2	0	0	0	0	0	0	0	0	0	0	0	0	0	0	0	0	0	0	0	0		YFCG	ECOLIDisulfide-bond oxidoreductase YfcG OS=Escherichia coli (strain K12) OX=83333 GN=yfcG PE=1 SV=1
TRINITY_DN111991_c0_g1_i1	0	0	0	1	0	1	0	0	0	0	0	0	0	0	0	0	0	0	0	0	0	0	0	0	0	0	0	0	0	0	0		YFCG	ECOLIDisulfide-bond oxidoreductase YfcG OS=Escherichia coli (strain K12) OX=83333 GN=yfcG PE=1 SV=1
TRINITY_DN27173_c0_g3_i1	0	0	0	0	0	0	0	0	0	0	0	0	0	0	62	0	0	0	0	0	0	0	0	0	0	0	0	0	0	0	0		YFBK	ECOLIUncharacterized protein YfbK OS=Escherichia coli (strain K12) OX=83333 GN=yfbK PE=4 SV=1
TRINITY_DN141011_c0_g1_i1	0	0	0	1	1	1	0	0	0	0	0	0	0	0	0	0	0	0	0	0	0	0	0	0	0	0	0	0	0	0	0		YFBK	ECOLIUncharacterized protein YfbK OS=Escherichia coli (strain K12) OX=83333 GN=yfbK PE=4 SV=1
TRINITY_DN114478_c0_g1_i1	0	0	0	0	0	0	0	0	0	0	0	0	0	0	0	1	0	0	0	0	0	0	0	0	0	0	0	0	0	0	0		YFAL	ECOLIProbable autotransporter YfaL OS=Escherichia coli (strain K12) OX=83333 GN=yfaL PE=1 SV=2
TRINITY_DN82872_c0_g1_i1	0	0	0	0	0	0	0	0	0	0	0	0	0	0	4	0	0	0	0	0	0	0	0	0	0	0	0	0	0	0	0		YF1BA	XENLAProtein YIF1B-A OS=Xenopus laevis OX=8355 GN=yif1b-a PE=2 SV=1
TRINITY_DN4580_c0_g1_i2	10.92	0	74	0	18.76	51	67	25	0	38	22.96	29	122	25.76	2	88.03	35	10	22	0	41	104	43	73	27.88	58	53	0	34	0	0		YEY2	YEASTUncharacterized protein YER152C OS=Saccharomyces cerevisiae (strain ATCC 204508 / S288c) OX=559292 GN=YER152C PE=1 SV=2
TRINITY_DN4580_c0_g1_i1	48.08	52	0	56	25.24	0	0	0	70	0	35.04	0	0	57.24	0	16.97	0	0	58	101	0	0	0	0	40.12	0	0	54	0	12	10		YEY2	YEASTUncharacterized protein YER152C OS=Saccharomyces cerevisiae (strain ATCC 204508 / S288c) OX=559292 GN=YER152C PE=1 SV=2
TRINITY_DN100526_c0_g1_i1	0	0	0	0	0	0	0	0	0	0	0	0	0	0	9	0	0	0	0	0	0	0	0	0	0	0	0	0	0	0	0		YEY2	YEASTUncharacterized protein YER152C OS=Saccharomyces cerevisiae (strain ATCC 204508 / S288c) OX=559292 GN=YER152C PE=1 SV=2
TRINITY_DN138696_c0_g1_i1	0	0	0	0	0	0	0	0	0	0	0	0	0	0	3	0	0	0	0	0	0	0	0	0	0	0	0	0	0	0	0		YETS4	HUMANYEATS domain-containing protein 4 OS=Homo sapiens OX=9606 GN=YEATS4 PE=1 SV=1
TRINITY_DN9095_c0_g1_i7	0	0	0	0	1	0	0	0	0	0	0	0	0	0	0	0	0	0	0	0	0	0	0	0	0	0	0	0	0	0	0		YETS4	HUMANYEATS domain-containing protein 4 OS=Homo sapiens OX=9606 GN=YEATS4 PE=1 SV=1
TRINITY_DN9095_c0_g1_i4	4.68	0	0	0	10.83	0	0	0	6.09	0	4.88	0	0	0	0	4.34	0	0	0	0	0	0	0	0	0	0	8.99	4.25	0	0	1.9		YETS4	HUMANYEATS domain-containing protein 4 OS=Homo sapiens OX=9606 GN=YEATS4 PE=1 SV=1
TRINITY_DN9095_c0_g1_i11	6.69	0	0	5.46	0	0	3.51	0	0	4.18	0	0	9.7	6.54	0	0	0	0	3.65	2.19	4.22	6.66	6	5.11	0	8.15	0	2.95	0	0	0		YETS4	HUMANYEATS domain-containing protein 4 OS=Homo sapiens OX=9606 GN=YEATS4 PE=1 SV=1
TRINITY_DN9095_c0_g1_i1	16.64	13	27	20.54	4.17	18	10.49	12	12.91	6.82	8.12	10	18.3	13.46	0	25.66	10	7	21.35	17.81	6.78	23.34	0	19.89	19	16.85	7.01	3.8	14	4	2.1		YETS4	HUMANYEATS domain-containing protein 4 OS=Homo sapiens OX=9606 GN=YEATS4 PE=1 SV=1
TRINITY_DN5902_c0_g2_i1	0	3.38	3.49	3.68	0	0	0	0	0	0	2.01	0	2.66	0	0	5.03	0	0	3.93	0	0	0	0	3.51	0	0	0	4.15	0	0	0		YETS2	MOUSEYEATS domain-containing protein 2 OS=Mus musculus OX=10090 GN=Yeats2 PE=1 SV=2
TRINITY_DN5902_c0_g2_i7	5.46	3.41	8.43	0	5.53	3.28	6.57	7.26	0	2.17	7.41	0	0	1.77	0	0	5	0	2.37	0	2.4	10.52	1.78	0	13.73	8.82	6.14	6.65	6.62	0	0		YETS2	MOUSEYEATS domain-containing protein 2 OS=Mus musculus OX=10090 GN=Yeats2 PE=1 SV=2
TRINITY_DN5902_c0_g2_i6	66.27	49.67	77.44	101.32	63.47	83.72	44.43	29.74	50	35.83	30.58	34	110.34	46.23	5	62.5	40	12	80.21	73	44.6	56.37	39.22	49.9	43.27	49.18	37.86	25.76	29.38	15	20		YETS2	MOUSEYEATS domain-containing protein 2 OS=Mus musculus OX=10090 GN=Yeats2 PE=1 SV=2
TRINITY_DN107418_c0_g1_i1	0	0	0	0	0	0	0	0	0	0	0	0	0	0	2	0	0	0	0	0	0	0	0	0	0	0	0	0	0	0	0		YETS2	MOUSEYEATS domain-containing protein 2 OS=Mus musculus OX=10090 GN=Yeats2 PE=1 SV=2
TRINITY_DN121217_c0_g1_i1	1	0	0	2	2	2	0	0	0	0	0	0	0	0	0	0	0	0	0	0	0	0	0	0	0	0	0	0	0	0	0		YESF	BACSUUncharacterized oxidoreductase YesF OS=Bacillus subtilis (strain 168) OX=224308 GN=yesF PE=3 SV=1
TRINITY_DN11609_c1_g1_i2	0	0	0	0	0	0	0	1	0	0	0	0	0	0	0	0	0	0	1	0	0	0	0	0	0	0	0	0	0	0	0		YES	XENLATyrosine-protein kinase Yes OS=Xenopus laevis OX=8355 GN=yes1 PE=2 SV=3
TRINITY_DN11609_c1_g1_i1	2	0	0	0	0	0	0	0	0	0	0	0	0	0	0	0	0	0	1	0	0	0	0	0	0	0	0	0	0	0	0		YES	XENLATyrosine-protein kinase Yes OS=Xenopus laevis OX=8355 GN=yes1 PE=2 SV=3
TRINITY_DN123037_c0_g1_i1	0	0	0	0	0	0	0	0	0	0	0	0	0	0	2	0	0	0	0	0	0	0	0	0	0	0	0	0	0	0	0		YES	AVISYTyrosine-protein kinase transforming protein Yes (Fragment) OS=Avian sarcoma virus (strain Y73) OX=11884 GN=V-YES PE=3 SV=2
TRINITY_DN126964_c0_g1_i1	1	3	0	0	0	0	1	0	0	1	2	0	0	0	0	0	0	0	0	0	0	0	0	0	1	0	1	0	1	0	0		YERD	BACSUGlutamate synthase large subunit-like protein YerD OS=Bacillus subtilis (strain 168) OX=224308 GN=yerD PE=3 SV=1
TRINITY_DN68317_c0_g1_i1	0	0	0	0	0	0	0	0	0	0	0	0	0	0	2	0	0	0	0	0	0	0	0	0	0	0	0	0	0	0	0		YERD	BACSUGlutamate synthase large subunit-like protein YerD OS=Bacillus subtilis (strain 168) OX=224308 GN=yerD PE=3 SV=1
TRINITY_DN69572_c0_g1_i1	0	0	0	0	0	1	0	1	0	0	0	0	0	0	0	0	0	0	0	0	0	0	0	0	0	0	0	0	0	0	0		YEJE	ECOLIInner membrane ABC transporter permease protein YejE OS=Escherichia coli (strain K12) OX=83333 GN=yejE PE=1 SV=1
TRINITY_DN24629_c0_g1_i1	0	0	4	2	0	0	0	0	1	0	0	1	1	0	0	1	0	0	1	0	0	0	0	0	0	0	0	0	0	0	0		YEHZ	ECOLIGlycine betaine-binding protein YehZ OS=Escherichia coli (strain K12) OX=83333 GN=yehZ PE=1 SV=1
TRINITY_DN24629_c1_g1_i1	0	0	0	0	1	0	0	0	0	0	0	0	0	0	0	1	0	0	0	0	0	0	0	0	0	0	0	0	0	0	0		YEHZ	ECOLIGlycine betaine-binding protein YehZ OS=Escherichia coli (strain K12) OX=83333 GN=yehZ PE=1 SV=1
TRINITY_DN122179_c0_g1_i1	0	0	0	2	0	1	0	0	0	0	0	0	0	0	0	0	0	0	0	0	0	0	0	0	0	0	0	0	0	0	0		YEGQ	ECOLIUncharacterized protease YegQ OS=Escherichia coli (strain K12) OX=83333 GN=yegQ PE=3 SV=1
TRINITY_DN114677_c0_g1_i1	0	0	0	2	0	0	0	0	0	0	0	0	0	0	0	0	0	0	0	0	0	0	0	0	0	0	0	0	0	0	0		YEG9	SCHPOUncharacterized oxidoreductase C26H5.09c OS=Schizosaccharomyces pombe (strain 972 / ATCC 24843) OX=284812 GN=SPAC26H5.09c PE=2 SV=3
TRINITY_DN67089_c0_g1_i1	0	0	0	0	0	0	0	0	0	0	0	0	0	0	7	0	0	0	0	0	0	0	0	0	0	0	0	0	0	0	0		YEG5	SCHPOAnkyrin and IPT/TIG repeat-containing protein C26H5.05 OS=Schizosaccharomyces pombe (strain 972 / ATCC 24843) OX=284812 GN=SPAC26H5.05 PE=4 SV=1
TRINITY_DN137671_c0_g1_i1	0	0	0	0	0	0	0	0	0	0	0	0	0	0	0	0	0	0	0	0	0	0	0	2	0	0	0	0	0	0	0		YECD	ECO57Uncharacterized isochorismatase family protein YecD OS=Escherichia coli O157:H7 OX=83334 GN=yecD PE=3 SV=2
TRINITY_DN118806_c0_g1_i1	0	0	0	0	0	0	0	0	0	8	0	0	0	0	0	0	0	0	0	0	0	0	0	0	0	0	0	0	0	0	0		YECD	ECO57Uncharacterized isochorismatase family protein YecD OS=Escherichia coli O157:H7 OX=83334 GN=yecD PE=3 SV=2
TRINITY_DN94244_c0_g1_i1	0	0	1	0	0	0	0	0	0	0	0	0	0	0	0	0	0	0	0	0	0	0	0	0	0	0	0	0	0	0	0		YEBG	ECO57Uncharacterized protein YebG OS=Escherichia coli O157:H7 OX=83334 GN=yebG PE=4 SV=1
TRINITY_DN48526_c0_g2_i1	0	0	0	0	0	0	0	0	0	0	0	0	0	0	3	0	0	0	0	0	0	0	0	0	0	0	0	0	0	0	0		YEAH	SCHPOUncharacterized protein UNK4.17 OS=Schizosaccharomyces pombe (strain 972 / ATCC 24843) OX=284812 GN=SPAC2E11.17 PE=4 SV=2
TRINITY_DN137243_c0_g1_i1	15	18	16	23	10	16	13	20	8	16	13	11	29	17	1	24	17	7	12	31	15	16	8	30	25	35	16	25	17	7	7		YEAH	SCHPOUncharacterized protein UNK4.17 OS=Schizosaccharomyces pombe (strain 972 / ATCC 24843) OX=284812 GN=SPAC2E11.17 PE=4 SV=2
TRINITY_DN48526_c0_g1_i1	0	0	0	0	0	0	0	0	0	0	0	0	0	0	21	0	0	0	0	0	0	0	0	0	0	0	0	0	0	0	0		YEAH	SCHPOUncharacterized protein UNK4.17 OS=Schizosaccharomyces pombe (strain 972 / ATCC 24843) OX=284812 GN=SPAC2E11.17 PE=4 SV=2
TRINITY_DN87008_c0_g1_i1	0	0	0	0	0	0	0	0	0	1	0	0	0	0	0	0	0	0	0	0	0	0	0	0	0	0	0	0	0	0	0		YEAG	ECO57Uncharacterized protein YeaG OS=Escherichia coli O157:H7 OX=83334 GN=yeaG PE=3 SV=1
TRINITY_DN105821_c0_g1_i1	0	1	0	0	0	0	2	0	0	1	0	2	3	0	0	1	0	0	3	0	0	0	0	1	1	2	0	0	1	0	0		YEAG	ECO57Uncharacterized protein YeaG OS=Escherichia coli O157:H7 OX=83334 GN=yeaG PE=3 SV=1
TRINITY_DN71474_c0_g1_i1	0	0	0	0	1	0	0	0	0	0	0	0	0	0	0	0	0	0	0	1	0	0	0	0	0	0	0	0	0	0	0		YEAC	BACSUUncharacterized protein YeaC OS=Bacillus subtilis (strain 168) OX=224308 GN=yeaC PE=3 SV=2
TRINITY_DN72312_c0_g1_i1	0	0	1	0	1	0	0	0	0	0	0	0	0	0	0	0	0	0	0	0	0	0	0	0	0	0	0	1	0	0	0		YEAC	BACSUUncharacterized protein YeaC OS=Bacillus subtilis (strain 168) OX=224308 GN=yeaC PE=3 SV=2
TRINITY_DN68287_c0_g1_i1	0	0	0	2	0	0	0	0	0	0	0	0	0	0	0	0	0	0	0	0	0	0	0	0	0	0	0	0	0	0	0		YEAC	BACSUUncharacterized protein YeaC OS=Bacillus subtilis (strain 168) OX=224308 GN=yeaC PE=3 SV=2
TRINITY_DN118302_c0_g1_i1	0	2	0	1	0	0	5	1	2	0	0	4	0	0	0	1	0	0	1	0	1	3	4	0	0	1	0	1	2	0	0		YEAC	BACSUUncharacterized protein YeaC OS=Bacillus subtilis (strain 168) OX=224308 GN=yeaC PE=3 SV=2
TRINITY_DN110008_c0_g1_i1	0	0	0	1	0	0	0	0	0	0	0	0	0	0	0	0	0	0	0	0	1	1	0	0	0	0	0	0	0	0	0		YEAC	BACSUUncharacterized protein YeaC OS=Bacillus subtilis (strain 168) OX=224308 GN=yeaC PE=3 SV=2
TRINITY_DN120373_c0_g1_i1	0	0	0	0	0	0	0	0	0	0	0	0	0	1	0	0	0	0	0	0	0	1	0	0	0	0	0	0	0	0	0		YEAC	BACSUUncharacterized protein YeaC OS=Bacillus subtilis (strain 168) OX=224308 GN=yeaC PE=3 SV=2
TRINITY_DN120374_c0_g1_i1	0	0	1	0	0	0	0	0	1	0	0	0	0	0	0	0	0	0	0	0	0	0	0	0	0	0	0	0	0	0	0		YEAC	BACSUUncharacterized protein YeaC OS=Bacillus subtilis (strain 168) OX=224308 GN=yeaC PE=3 SV=2
TRINITY_DN141403_c0_g1_i1	0	0	0	0	0	0	0	0	0	0	0	0	0	0	3	0	0	0	0	0	0	0	0	0	0	0	0	0	0	0	0		YEA8	SCHPOPutative dipeptidyl aminopeptidase C2E11.08 OS=Schizosaccharomyces pombe (strain 972 / ATCC 24843) OX=284812 GN=SPAC2E11.08 PE=3 SV=1
TRINITY_DN78775_c0_g1_i1	0	0	0	0	1	2	0	0	0	0	0	0	0	0	0	1	0	0	0	0	0	0	0	0	0	0	0	0	0	0	0		YDYA	SCHPOUncharacterized protein C11E3.10 OS=Schizosaccharomyces pombe (strain 972 / ATCC 24843) OX=284812 GN=SPAC11E3.10 PE=4 SV=2
TRINITY_DN32418_c0_g1_i2	0	0	0	0	0	0	0	0	0	0	0	0	0	0	2	0	0	0	0	0	0	0	0	0	0	0	0	0	0	0	0		YDM6	SCHPOUncharacterized protein C57A7.06 OS=Schizosaccharomyces pombe (strain 972 / ATCC 24843) OX=284812 GN=SPAC57A7.06 PE=1 SV=1
TRINITY_DN141879_c0_g1_i1	0	0	0	0	0	0	0	0	0	0	0	0	0	0	0	0	1	0	0	0	0	0	0	0	0	0	0	0	0	0	0		YDJ1	CAEELUncharacterized protein ZK1073.1 OS=Caenorhabditis elegans OX=6239 GN=ZK1073.1 PE=3 SV=1
TRINITY_DN61507_c0_g1_i1	0	0	0	0	0	0	0	0	0	0	0	0	0	0	0	0	3	0	0	0	0	0	0	0	0	0	0	0	0	0	0		YDJ1	CAEELUncharacterized protein ZK1073.1 OS=Caenorhabditis elegans OX=6239 GN=ZK1073.1 PE=3 SV=1
TRINITY_DN112365_c0_g1_i1	0	0	0	0	0	0	0	0	0	2	0	0	0	0	0	0	0	0	0	0	0	0	0	0	0	0	0	0	0	0	0		YDJ1	CAEELUncharacterized protein ZK1073.1 OS=Caenorhabditis elegans OX=6239 GN=ZK1073.1 PE=3 SV=1
TRINITY_DN86584_c0_g1_i1	0	0	0	0	0	0	0	0	0	0	0	0	0	0	4	0	0	0	0	0	0	0	0	0	0	0	0	0	0	0	0		YDHY	ECO57Uncharacterized ferredoxin-like protein YdhY OS=Escherichia coli O157:H7 OX=83334 GN=ydhY PE=4 SV=1
TRINITY_DN65779_c0_g1_i1	0	0	0	2	0	0	0	0	0	0	0	0	1	0	0	0	0	0	0	0	0	0	0	0	0	0	0	0	0	0	0		YDHY	CITFRUncharacterized 15.0 kDa protein in dhaT-dhaS intergenic region OS=Citrobacter freundii OX=546 PE=3 SV=1
TRINITY_DN54543_c0_g2_i1	1	0	0	0	0	0	0	0	1	0	1	0	2	0	0	0	0	0	1	2	0	0	0	0	0	0	0	0	2	0	0		YDHJ	ECOLIUncharacterized protein YdhJ OS=Escherichia coli (strain K12) OX=83333 GN=ydhJ PE=3 SV=2
TRINITY_DN70275_c0_g1_i1	0	0	0	0	0	0	0	0	0	0	0	0	0	0	0	0	0	0	0	2	0	0	0	0	0	0	0	0	0	0	0		YDHF	ECOLIOxidoreductase YdhF OS=Escherichia coli (strain K12) OX=83333 GN=ydhF PE=1 SV=2
TRINITY_DN75027_c0_g1_i1	0	0	1	0	1	0	1	0	0	0	0	0	1	0	0	0	0	0	0	0	0	0	0	0	0	0	0	0	0	0	0		YDFJ	BACSUMembrane protein YdfJ OS=Bacillus subtilis (strain 168) OX=224308 GN=ydfJ PE=2 SV=1
TRINITY_DN86039_c0_g1_i1	0	1	1	0	0	0	0	1	0	0	0	0	0	0	0	0	0	0	0	0	0	0	0	0	0	0	0	0	0	0	0		YDFJ	BACSUMembrane protein YdfJ OS=Bacillus subtilis (strain 168) OX=224308 GN=ydfJ PE=2 SV=1
TRINITY_DN65006_c0_g1_i1	0	1	1	1	0	0	0	0	0	0	0	0	1	0	1	0	0	0	0	0	0	0	0	0	0	0	0	0	0	0	0		YDFJ	BACSUMembrane protein YdfJ OS=Bacillus subtilis (strain 168) OX=224308 GN=ydfJ PE=2 SV=1
TRINITY_DN86739_c0_g1_i1	0	0	0	0	0	0	0	1	0	0	0	1	0	0	0	0	0	0	0	0	0	0	0	0	0	0	0	0	0	0	0		YDFJ	BACSUMembrane protein YdfJ OS=Bacillus subtilis (strain 168) OX=224308 GN=ydfJ PE=2 SV=1
TRINITY_DN91917_c0_g1_i1	0	0	0	0	0	0	2	0	0	0	0	1	0	0	0	0	0	0	0	0	0	0	0	0	0	0	0	0	0	0	0		YDFG	ECOL6NADP-dependent 3-hydroxy acid dehydrogenase YdfG OS=Escherichia coli O6:H1 (strain CFT073 / ATCC 700928 / UPEC) OX=199310 GN=ydfG PE=3 SV=2
TRINITY_DN84416_c0_g1_i1	0	0	0	0	0	0	0	0	0	2	0	0	0	0	0	0	0	0	0	0	0	0	0	0	0	0	0	0	0	0	0		YDFD	BACSUUncharacterized HTH-type transcriptional regulator YdfD OS=Bacillus subtilis (strain 168) OX=224308 GN=ydfD PE=3 SV=1
TRINITY_DN54456_c0_g1_i1	0	0	0	0	0	0	0	0	0	1	0	0	0	0	0	0	0	0	0	0	0	0	0	1	0	0	0	0	0	0	0		YDCS	ECOLIBifunctional polyhydroxybutyrate synthase / ABC transporter periplasmic binding protein OS=Escherichia coli (strain K12) OX=83333 GN=ydcS PE=1 SV=1
TRINITY_DN54456_c0_g2_i1	0	0	0	0	0	0	0	0	0	0	1	0	0	0	0	0	0	0	0	0	0	0	0	0	0	0	0	0	0	0	0		YDCS	ECOLIBifunctional polyhydroxybutyrate synthase / ABC transporter periplasmic binding protein OS=Escherichia coli (strain K12) OX=83333 GN=ydcS PE=1 SV=1
TRINITY_DN81071_c0_g1_i1	0	0	0	0	0	0	0	0	0	0	0	0	0	0	2	0	0	0	0	0	0	0	0	0	0	0	0	0	0	0	0		YDBJ	BACSUUncharacterized ABC transporter ATP-binding protein YdbJ OS=Bacillus subtilis (strain 168) OX=224308 GN=ydbJ PE=3 SV=1
TRINITY_DN61243_c0_g1_i1	0	0	0	0	0	0	1	0	0	0	0	0	0	0	0	0	0	0	0	1	0	0	1	0	0	0	0	0	0	0	0		YDAP	BACSUPutative thiamine pyrophosphate-containing protein YdaP OS=Bacillus subtilis (strain 168) OX=224308 GN=ydaP PE=2 SV=1
TRINITY_DN124184_c0_g1_i1	2	0	0	0	2	0	3	2	0	0	0	0	0	0	0	0	1	1	2	0	0	1	2	1	0	1	0	0	0	0	0		YDAP	BACSUPutative thiamine pyrophosphate-containing protein YdaP OS=Bacillus subtilis (strain 168) OX=224308 GN=ydaP PE=2 SV=1
TRINITY_DN22470_c0_g1_i1	0	0	0	1	0	0	0	0	1	2	0	0	3	1	0	0	0	0	1	0	0	0	1	0	0	0	0	3	0	0	0		YD58	SCHPOAnkyrin repeat-containing protein C6C3.08 OS=Schizosaccharomyces pombe (strain 972 / ATCC 24843) OX=284812 GN=SPAC6C3.08 PE=4 SV=1
TRINITY_DN80835_c0_g1_i1	0	0	0	0	0	0	0	0	0	0	0	0	0	0	1	1	0	0	1	0	0	0	0	0	0	0	0	0	0	0	0		YCXI	PORPUUncharacterized protein in rpl9-rpl11 intergenic region OS=Porphyra purpurea OX=2787 PE=3 SV=1
TRINITY_DN128548_c0_g1_i1	0	0	0	0	0	1	0	0	0	0	0	1	0	0	0	0	0	0	0	0	0	0	0	0	0	0	0	0	0	0	0		YCX2	OSTTAUncharacterized membrane protein OtCpg00060 OS=Ostreococcus tauri OX=70448 GN=OtCpg00060 PE=4 SV=1
TRINITY_DN105974_c0_g1_i2	0	5	2	5	1	1	7	4	0	6	3	0	6.81	0	6	14	4	0	7.05	13	3	11	9	0	2	0	1	0	0	0	0		YCX1	CHLMOUncharacterized 38.5 kDa protein in psbA intron 1 OS=Chlamydomonas moewusii OX=3054 PE=4 SV=1
TRINITY_DN16045_c1_g1_i1	0	0	0	0	0	1	0	0	0	0	0	0	0	0	0	0	0	0	0	0	0	0	0	0	0	0	0	0	0	0	0		YCU1	YEASTAnkyrin repeat-containing protein YCR051W OS=Saccharomyces cerevisiae (strain ATCC 204508 / S288c) OX=559292 GN=YCR051W PE=1 SV=1
TRINITY_DN41471_c0_g1_i2	0	0	0	0	0	0	0	0	0	1	0	0	0	1	0	1	0	0	0	0	0	3	0	0	0	0	0	1	0	0	0		YCU1	YEASTAnkyrin repeat-containing protein YCR051W OS=Saccharomyces cerevisiae (strain ATCC 204508 / S288c) OX=559292 GN=YCR051W PE=1 SV=1
TRINITY_DN44525_c0_g1_i1	0	0	0	0	0	0	0	0	0	0	1	0	0	0	0	0	0	1	0	0	0	0	0	3	1	0	0	0	0	0	0		YCU1	YEASTAnkyrin repeat-containing protein YCR051W OS=Saccharomyces cerevisiae (strain ATCC 204508 / S288c) OX=559292 GN=YCR051W PE=1 SV=1
TRINITY_DN15313_c3_g1_i2	0	0	0	0	1	0	2	0	0	0	0	0	0	0	0	0	0	0	0	0	0	0	0	0	0	3	0	0	1	0	0		YCU1	YEASTAnkyrin repeat-containing protein YCR051W OS=Saccharomyces cerevisiae (strain ATCC 204508 / S288c) OX=559292 GN=YCR051W PE=1 SV=1
TRINITY_DN15313_c1_g2_i1	0	0	0	0	0	0	1	0	0	0	0	0	0	2	0	3	0	0	0	0	0	7	0	0	1	0	0	2	0	0	0		YCU1	YEASTAnkyrin repeat-containing protein YCR051W OS=Saccharomyces cerevisiae (strain ATCC 204508 / S288c) OX=559292 GN=YCR051W PE=1 SV=1
TRINITY_DN21911_c0_g1_i1	1	0	0	0	0	0.99	0	1.22	0	0	0	0	6.09	0	0	1.8	1.99	0	2.01	0	0	1	0	4.6	1	0	0	0	2	0	0		YCU1	YEASTAnkyrin repeat-containing protein YCR051W OS=Saccharomyces cerevisiae (strain ATCC 204508 / S288c) OX=559292 GN=YCR051W PE=1 SV=1
TRINITY_DN16985_c0_g1_i17	0	0	0	0	2.36	0	0	0	0	0	0	0	0	0	0	1.29	0	0	0	1.8	0	0	0	2.96	3.61	1	1.33	0	0.9	0	1.76		YCU1	YEASTAnkyrin repeat-containing protein YCR051W OS=Saccharomyces cerevisiae (strain ATCC 204508 / S288c) OX=559292 GN=YCR051W PE=1 SV=1
TRINITY_DN25280_c0_g3_i3	0	0	1	0	0	0	0	0	0	0	0	0	0	0	0	0	0	0	0	0	0	0	0	0	0	0.91	0	0	0	0	0		YCU1	YEASTAnkyrin repeat-containing protein YCR051W OS=Saccharomyces cerevisiae (strain ATCC 204508 / S288c) OX=559292 GN=YCR051W PE=1 SV=1
TRINITY_DN44525_c0_g1_i3	0	1	0	0	0	0	0	0	0	0	0	0	0	0	0	0	0	0	0	1	0	0	0	0	0	0	0	0	2	0	0		YCU1	YEASTAnkyrin repeat-containing protein YCR051W OS=Saccharomyces cerevisiae (strain ATCC 204508 / S288c) OX=559292 GN=YCR051W PE=1 SV=1
TRINITY_DN29501_c0_g1_i1	1	2.99	0	1	0	0	0	2	0	0	0	0	2	1.97	0	1	0	0	1	0	0	2	0	2	0	0	1	2	1	0	0		YCU1	YEASTAnkyrin repeat-containing protein YCR051W OS=Saccharomyces cerevisiae (strain ATCC 204508 / S288c) OX=559292 GN=YCR051W PE=1 SV=1
TRINITY_DN25280_c0_g3_i13	0	0	0	0	0	0	0	0	0	0	0	0	0	5	0	2	0	0	0	0	0	3	0	1	0	0	0	2	0	0	0		YCU1	YEASTAnkyrin repeat-containing protein YCR051W OS=Saccharomyces cerevisiae (strain ATCC 204508 / S288c) OX=559292 GN=YCR051W PE=1 SV=1
TRINITY_DN16985_c0_g1_i20	0	0	0	2.2	0	2.85	1	0	0	0	0	0	0	0	0	0	0	0	0	1.2	1	0	0	1.25	2.73	0	2.64	1.36	0	1	0.49		YCU1	YEASTAnkyrin repeat-containing protein YCR051W OS=Saccharomyces cerevisiae (strain ATCC 204508 / S288c) OX=559292 GN=YCR051W PE=1 SV=1
TRINITY_DN18008_c0_g1_i2	0	0	0	0	0	0	0	0	0	0	0	0	0	0	10.49	0	0	0	0	0	0	0	0	0	0	0	0	0	0	0	0		YCU1	YEASTAnkyrin repeat-containing protein YCR051W OS=Saccharomyces cerevisiae (strain ATCC 204508 / S288c) OX=559292 GN=YCR051W PE=1 SV=1
TRINITY_DN1579_c3_g1_i20	8.05	6.09	6.2	6.77	0	6	24.22	11.84	14.71	9.07	9.46	3	3.48	8	0	9.25	2	1.38	12.95	11.85	3.79	10.5	3.97	63.73	32.33	23.68	8.55	7.83	14.99	4.01	0		YCU1	YEASTAnkyrin repeat-containing protein YCR051W OS=Saccharomyces cerevisiae (strain ATCC 204508 / S288c) OX=559292 GN=YCR051W PE=1 SV=1
TRINITY_DN108759_c0_g1_i1	0	0	0	0	0	0	0	0	0	0	0	0	0	0	0	0	0	0	0	0	0	1	0	0	0	0	0	1	0	0	0		YCP4	SYNPYUncharacterized 16.1 kDa protein in cpeY 3'region OS=Synechococcus sp. (strain WH8020) OX=32052 PE=4 SV=1
TRINITY_DN66525_c0_g1_i1	0	0	0	0	0	1	0	0	0	0	0	0	0	0	0	0	0	1	0	0	0	0	0	0	0	0	0	0	0	0	0		YCP4	SYNPYUncharacterized 16.1 kDa protein in cpeY 3'region OS=Synechococcus sp. (strain WH8020) OX=32052 PE=4 SV=1
TRINITY_DN140228_c0_g1_i1	0	0	0	0	0	0	0	0	0	0	0	0	0	0	5	0	0	0	0	0	0	0	0	0	0	0	0	0	0	0	0		YCN8	SCHPOUncharacterized solute carrier family 35 member C320.08 OS=Schizosaccharomyces pombe (strain 972 / ATCC 24843) OX=284812 GN=SPCC320.08 PE=1 SV=1
TRINITY_DN12535_c0_g1_i6	4	0	6.43	0	0	3.58	4.82	0	1.42	0	3.98	4.47	1.24	5	0	0	0	0	4.3	2.89	0.06	1.39	3.92	8.17	0	0	0	10	0	0	0		YCLC	PSEPUUPF0065 protein in clcB-clcD intergenic region OS=Pseudomonas putida OX=303 PE=3 SV=1
TRINITY_DN105824_c0_g1_i1	0	0	0	0	0	0	0	0	0	0	0	0	0	0	13	0	0	0	0	0	0	0	0	0	0	0	0	0	0	0	0		YCLC	PSEPUUPF0065 protein in clcB-clcD intergenic region OS=Pseudomonas putida OX=303 PE=3 SV=1
TRINITY_DN38933_c0_g2_i1	6	0	3	4	7	0	0	1	1	0	0	0	1	2	0	0	1	0	0	0	0	0	0	0	0	0	0	0	0	0	0		YCLC	PSEPUUPF0065 protein in clcB-clcD intergenic region OS=Pseudomonas putida OX=303 PE=3 SV=1
TRINITY_DN68360_c0_g1_i1	0	0	0	0	0	2	0	0	0	0	0	0	1	0	0	0	0	0	0	0	0	0	0	0	0	0	0	0	0	0	0		YCLC	PSEAIUPF0065 protein in clcB-clcD intergenic region OS=Pseudomonas aeruginosa OX=287 PE=1 SV=1
TRINITY_DN98225_c0_g1_i1	0	0	0	0	0	0	0	0	0	0	0	0	0	0	9	0	0	0	0	0	0	0	0	0	0	0	0	0	0	0	0		YCII	ECOL6Protein YciI OS=Escherichia coli O6:H1 (strain CFT073 / ATCC 700928 / UPEC) OX=199310 GN=yciI PE=3 SV=1
TRINITY_DN104297_c0_g1_i1	0	1	0	1	0	0	0	0	0	0	0	0	0	0	0	0	0	0	0	0	0	0	0	0	0	0	0	0	0	0	0		YCIC	BACSUPutative metal chaperone YciC OS=Bacillus subtilis (strain 168) OX=224308 GN=yciC PE=2 SV=1
TRINITY_DN139397_c0_g1_i1	0	0	0	2	0	0	0	0	0	0	0	0	0	0	0	0	0	0	0	0	0	0	0	0	0	0	0	0	0	0	0		YCHF	PASMURibosome-binding ATPase YchF OS=Pasteurella multocida (strain Pm70) OX=272843 GN=ychF PE=3 SV=3
TRINITY_DN72639_c0_g1_i1	0	0	0	0	1	0	0	0	0	0	0	0	0	1	0	0	0	0	0	0	0	0	0	0	0	0	0	0	0	0	0		YCHF	HAEDURibosome-binding ATPase YchF OS=Haemophilus ducreyi (strain 35000HP / ATCC 700724) OX=233412 GN=ychF PE=3 SV=3
TRINITY_DN140072_c0_g1_i1	0	0	0	0	0	0	0	0	0	0	0	0	0	0	0	0	0	0	0	1	0	0	0	0	0	0	0	1	0	0	0		YCHF	HAEDURibosome-binding ATPase YchF OS=Haemophilus ducreyi (strain 35000HP / ATCC 700724) OX=233412 GN=ychF PE=3 SV=3
TRINITY_DN32067_c0_g1_i1	4	8	11	5	9	11	6	3	6	4	8	0	19	5	0	4	6	7	14	12	9	9	8	7	14	7	15	5	10	0	0		YCHF	ECO57Ribosome-binding ATPase YchF OS=Escherichia coli O157:H7 OX=83334 GN=ychF PE=3 SV=2
TRINITY_DN77202_c0_g1_i1	0	0	0	0	0	0	0	0	0	0	0	0	0	0	2	0	0	0	0	0	0	0	0	0	0	0	0	0	0	0	0		YCHF	BUCAPRibosome-binding ATPase YchF OS=Buchnera aphidicola subsp. Schizaphis graminum (strain Sg) OX=198804 GN=ychF PE=3 SV=3
TRINITY_DN114228_c0_g1_i1	1	1	0	0	1	0	0	0	0	0	0	0	0	0	0	0	0	0	0	0	0	0	0	0	0	0	0	0	0	0	0		YCHF	BACSURibosome-binding ATPase YchF OS=Bacillus subtilis (strain 168) OX=224308 GN=ychF PE=2 SV=1
TRINITY_DN29796_c2_g1_i1	0	3	0	2	0	0	0	0	0	1	0	1	2	0	0	0	1	0	1	0	2	0	0	1	0	0	1	1	0	0	0		YCH5	YEASTPutative transposon Ty5-1 protein YCL075W OS=Saccharomyces cerevisiae (strain ATCC 204508 / S288c) OX=559292 GN=TY5B PE=5 SV=1
TRINITY_DN88403_c0_g1_i1	0	0	0	0	0	0	0	0	0	0	0	0	0	0	0	0	0	0	0	0	0	0	0	2	0	0	0	0	0	0	0		YCGR	BACSUUPF0718 protein YcgR OS=Bacillus subtilis (strain 168) OX=224308 GN=ycgR PE=3 SV=1
TRINITY_DN33368_c0_g1_i3	0	0	0	0	0	0	0	0	0	0	0	0	0	0	40.15	0	0	0	0	0	0	0	0	0	0	1	0	0	0	0	0		YCGJ	BACSUUncharacterized methyltransferase YcgJ OS=Bacillus subtilis (strain 168) OX=224308 GN=ycgJ PE=1 SV=2
TRINITY_DN647_c2_g1_i1	0	1	0	0	0	0	0	0	0	0	0	0	0	0	0	0	0	0	0	0	0	0	0	0	0	0	0	0	0	1	0		YCFI	YEASTMetal resistance protein YCF1 OS=Saccharomyces cerevisiae (strain ATCC 204508 / S288c) OX=559292 GN=YCF1 PE=1 SV=2
TRINITY_DN8129_c0_g1_i1	0	0	0	0	1	0	0	1	0	0	0.68	0	0	0	0	0	0	0	1	2	0	0	0	0	0	0	0	1	0	2.76	0		YCFI	YEASTMetal resistance protein YCF1 OS=Saccharomyces cerevisiae (strain ATCC 204508 / S288c) OX=559292 GN=YCF1 PE=1 SV=2
TRINITY_DN647_c2_g1_i2	3	0	4	3	3	3	0	1	1	3	1	2	6	1	0	3	0	0	2	0	2	2	4	3	2	2	3	6	6	0	0		YCFI	YEASTMetal resistance protein YCF1 OS=Saccharomyces cerevisiae (strain ATCC 204508 / S288c) OX=559292 GN=YCF1 PE=1 SV=2
TRINITY_DN113920_c0_g1_i1	0	0	0	0	0	0	0	0	0	0	0	0	0	0	0	0	0	0	0	0	0	0	0	0	0	0	0	0	0	0	0		YCFH	ECO57Uncharacterized metal-dependent hydrolase YcfH OS=Escherichia coli O157:H7 OX=83334 GN=ycfH PE=3 SV=1
TRINITY_DN60363_c0_g1_i1	1	3	3	15	4	5	0	0	0	0	1	0	0	0	0	0	0	0	0	0	0	0	0	0	0	0	0	0	0	0	0		YCF90	TRICVUncharacterized protein ycf90 OS=Trieres chinensis OX=1514140 GN=ycf90 PE=3 SV=1
TRINITY_DN133261_c0_g1_i1	0	3	2	0	1	1	0	0	0	0	0	0	0	0	0	0	0	0	0	0	0	0	0	0	0	0	0	0	0	0	0		YCF90	TRICVUncharacterized protein ycf90 OS=Trieres chinensis OX=1514140 GN=ycf90 PE=3 SV=1
TRINITY_DN141426_c0_g1_i1	0	0	0	2	0	0	0	0	0	0	0	0	0	0	0	0	0	0	0	0	0	0	0	0	0	0	0	0	0	0	0		YCF89	TRICVUncharacterized protein ycf89 OS=Trieres chinensis OX=1514140 GN=ycf89-A PE=3 SV=1
TRINITY_DN100683_c0_g1_i1	0	0	0	0	0	0	0	0	0	0	0	0	1	1	0	0	0	0	0	2	0	0	0	0	0	0	0	0	0	0	0		YCF78	PROWIUncharacterized membrane protein ycf78 OS=Prototheca wickerhamii OX=3111 GN=ycf78 PE=3 SV=1
TRINITY_DN27090_c0_g3_i1	0	0	0	3	4	0	0	0	0	0	21	1	0	17	0	0	1	2	0	1	0	0	0	0	0	0	0	1	0	0	0		YCF78	OLTVIUncharacterized membrane protein ycf78 OS=Oltmannsiellopsis viridis OX=51324 GN=ycf78 PE=3 SV=1
TRINITY_DN27090_c0_g2_i1	0	0	0	7	9	0	0	0	0	0	37	0	0	19	0	1	1	2	0	0	0	0	0	2	0	1	0	1	0	0	0		YCF78	OLTVIUncharacterized membrane protein ycf78 OS=Oltmannsiellopsis viridis OX=51324 GN=ycf78 PE=3 SV=1
TRINITY_DN27090_c0_g1_i1	0	0	0	2	2	0	0	0	0	0	5	0	0	2	0	0	2	0	0	0	0	0	0	0	0	0	0	0	0	0	0		YCF78	OLTVIUncharacterized membrane protein ycf78 OS=Oltmannsiellopsis viridis OX=51324 GN=ycf78 PE=3 SV=1
TRINITY_DN95201_c0_g1_i1	0	0	0	0	0	0	0	0	0	0	0	0	0	1	0	0	0	0	1	0	1	0	1	0	0	0	0	0	0	0	0		YCF78	OLTVIUncharacterized membrane protein ycf78 OS=Oltmannsiellopsis viridis OX=51324 GN=ycf78 PE=3 SV=1
TRINITY_DN75042_c0_g1_i1	0	0	1	0	0	0	1	0	0	0	0	0	1	0	0	1	0	0	0	0	3	0	1	0	0	0	0	0	0	0	0		YCF78	OLTVIUncharacterized membrane protein ycf78 OS=Oltmannsiellopsis viridis OX=51324 GN=ycf78 PE=3 SV=1
TRINITY_DN76503_c0_g1_i1	0	0	0	0	1	0	1	0	0	0	0	0	1	1	0	0	0	1	0	0	0	0	0	0	0	1	0	1	0	0	0		YCF78	CHLVUUncharacterized membrane protein ycf78 OS=Chlorella vulgaris OX=3077 GN=ycf78 PE=3 SV=1
TRINITY_DN126740_c0_g1_i1	0	0	0	0	0	1	1	2	1	0	0	0	1	0	0	1	0	0	2	0	0	1	1	1	0	1	0	0	0	0	0		YCF78	CHLVUUncharacterized membrane protein ycf78 OS=Chlorella vulgaris OX=3077 GN=ycf78 PE=3 SV=1
TRINITY_DN64206_c0_g1_i1	0	2	1	5	0	1	0	0	0	0	0	0	0	0	0	0	0	0	1	0	0	0	0	0	0	0	0	0	0	0	0		YCF66	TRICVUncharacterized protein ycf66 OS=Trieres chinensis OX=1514140 GN=ycf66 PE=3 SV=1
TRINITY_DN31581_c1_g1_i1	0	0	0	0	0	0	0	0	0	0	0	0	0	0	0	0	0	0	1	0	0	0	0	0	2	1	0	0	0	0	0		YCF66	TRICVUncharacterized protein ycf66 OS=Trieres chinensis OX=1514140 GN=ycf66 PE=3 SV=1
TRINITY_DN31581_c0_g1_i1	0	0	0	3	0	0	0	0	0	0	0	1	0	2	0	0	0	0	0	0	0	0	0	0	0	0	0	0	0	0	0		YCF66	TRICVUncharacterized protein ycf66 OS=Trieres chinensis OX=1514140 GN=ycf66 PE=3 SV=1
TRINITY_DN30156_c1_g1_i2	0	0	0	0	0	0	0	0	0	0	0	0	0	0.49	0	0	0	0	0	0	0	0	0	0	0	0	0	0	0	0	0		YCF66	TRICVUncharacterized protein ycf66 OS=Trieres chinensis OX=1514140 GN=ycf66 PE=3 SV=1
TRINITY_DN80345_c0_g1_i1	0	0	0	1	0	0	0	0	0	0	1	0	1	0	0	1	0	0	0	0	0	0	0	0	0	0	0	0	0	0	0		YCF66	TRICVUncharacterized protein ycf66 OS=Trieres chinensis OX=1514140 GN=ycf66 PE=3 SV=1
TRINITY_DN30156_c1_g1_i1	0	0	0	3	0	0	1	0	0	0	2	0	0	2.51	0	0	0	0	0	0	0	0	0	0	0	0	0	0	0	0	0		YCF66	TRICVUncharacterized protein ycf66 OS=Trieres chinensis OX=1514140 GN=ycf66 PE=3 SV=1
TRINITY_DN30156_c0_g1_i1	0	1	0	8	2	1	1	2	0	0	2	2	0	5	0	0	0	0	1	0	0	0	0	0	0	0	0	0	0	0	0		YCF66	TRICVUncharacterized protein ycf66 OS=Trieres chinensis OX=1514140 GN=ycf66 PE=3 SV=1
TRINITY_DN143048_c0_g1_i1	0	0	0	1	1	0	0	0	0	0	0	0	0	0	0	0	0	0	0	0	0	0	0	0	0	0	0	0	0	0	0		YCF46	TRICVUncharacterized AAA domain-containing protein ycf46 OS=Trieres chinensis OX=1514140 GN=ycf46 PE=3 SV=1
TRINITY_DN80797_c0_g1_i1	0	0	2	1	0	0	0	0	0	0	0	0	0	0	0	0	0	0	0	0	0	0	0	0	0	0	0	0	0	0	0		YCF46	TRICVUncharacterized AAA domain-containing protein ycf46 OS=Trieres chinensis OX=1514140 GN=ycf46 PE=3 SV=1
TRINITY_DN88044_c0_g1_i1	0	0	0	3	0	0	0	0	0	0	0	0	0	1	0	0	0	0	0	0	0	0	0	0	0	0	0	0	0	0	0		YCF45	TRICVUncharacterized protein ycf45 OS=Trieres chinensis OX=1514140 GN=ycf45 PE=3 SV=1
TRINITY_DN72935_c0_g1_i1	0	0	0	0	0	0	0	0	0	0	0	0	0	0	0	0	0	0	0	0	2	0	0	0	0	0	0	0	0	0	0		YCF45	PORPUUncharacterized protein ycf45 OS=Porphyra purpurea OX=2787 GN=ycf45 PE=3 SV=1
TRINITY_DN82795_c0_g1_i1	0	0	0	0	0	0	0	0	0	0	0	0	0	1	0	0	0	0	0	0	0	0	0	0	0	0	0	0	0	0	0		YCF45	PORPUUncharacterized protein ycf45 OS=Porphyra purpurea OX=2787 GN=ycf45 PE=3 SV=1
TRINITY_DN99991_c0_g1_i1	0	0	1	0	0	0	0	0	0	0	0	0	0	0	0	0	0	0	0	0	0	0	0	0	0	0	0	0	0	0	0		YCF43	TRICVUncharacterized tatC-like protein ycf43 OS=Trieres chinensis OX=1514140 GN=ycf43 PE=3 SV=1
TRINITY_DN104018_c0_g1_i1	1	1	0	0	0	0	0	0	0	0	0	0	0	0	0	0	0	0	0	0	0	0	0	0	0	0	0	0	0	0	0		YCF43	TRICVUncharacterized tatC-like protein ycf43 OS=Trieres chinensis OX=1514140 GN=ycf43 PE=3 SV=1
TRINITY_DN108754_c0_g1_i1	0	0	1	0	0	0	0	0	0	1	1	0	0	0	0	0	0	0	0	0	0	0	0	0	0	0	0	0	0	0	0		YCF43	TRICVUncharacterized tatC-like protein ycf43 OS=Trieres chinensis OX=1514140 GN=ycf43 PE=3 SV=1
TRINITY_DN39604_c0_g3_i1	0	1	2	0	0	0	1	0	0	0	1	0	0	2	0	0	0	0	0	0	0	0	0	0	0	1	0	0	0	0	0		YCF43	TRICVUncharacterized tatC-like protein ycf43 OS=Trieres chinensis OX=1514140 GN=ycf43 PE=3 SV=1
TRINITY_DN39604_c1_g1_i1	0	0	0	2	0	0	0	0	0	0	0	0	0	3	0	0	0	0	0	0	0	0	0	0	0	0	0	0	0	0	0		YCF43	TRICVUncharacterized tatC-like protein ycf43 OS=Trieres chinensis OX=1514140 GN=ycf43 PE=3 SV=1
TRINITY_DN39604_c0_g1_i1	0	0	0	2	1	1	0	0	0	0	0	0	0	0	0	0	0	0	0	0	0	0	0	0	0	0	0	0	0	0	0		YCF43	TRICVUncharacterized tatC-like protein ycf43 OS=Trieres chinensis OX=1514140 GN=ycf43 PE=3 SV=1
TRINITY_DN39604_c0_g2_i2	0	9.26	2.14	0	2.06	0	0	0	2	0	3.53	1.24	0	0	0	1	0	0	0	0	0	0	0	0	0	0	0	1	0	0	0		YCF43	TRICVUncharacterized tatC-like protein ycf43 OS=Trieres chinensis OX=1514140 GN=ycf43 PE=3 SV=1
TRINITY_DN78816_c0_g1_i1	0	6	2	26	6	11	0	0	0	0	0	0	0	2	0	0	0	0	0	0	0	0	0	0	0	0	0	0	0	0	0		YCF42	TRICVPutative peroxiredoxin ycf42 OS=Trieres chinensis OX=1514140 GN=ycf42 PE=3 SV=1
TRINITY_DN97595_c0_g1_i1	0	0	0	0	0	0	0	0	0	0	0	0	0	2	0	0	0	0	0	0	0	0	0	0	0	0	0	0	0	0	0		YCF42	TRICVPutative peroxiredoxin ycf42 OS=Trieres chinensis OX=1514140 GN=ycf42 PE=3 SV=1
TRINITY_DN139759_c0_g1_i1	0	0	1	1	0	0	0	0	0	0	1	0	0	1	0	0	0	0	0	0	0	0	0	0	0	0	0	0	0	0	0		YCF42	TRICVPutative peroxiredoxin ycf42 OS=Trieres chinensis OX=1514140 GN=ycf42 PE=3 SV=1
TRINITY_DN135103_c0_g1_i1	0	1	0	1	0	0	0	1	0	0	0	0	0	0	3	2	0	0	0	0	0	3	0	0	1	1	0	0	0	0	0		YCF42	PYRYEPutative peroxiredoxin ycf42 OS=Pyropia yezoensis OX=2788 GN=ycf42 PE=3 SV=1
TRINITY_DN61685_c0_g1_i1	0	0	0	0	0	0	0	0	0	0	0	0	2	0	0	5	2	0	0	1	2	2	0	0	2	0	0	0	0	0	0		YCF42	PYRYEPutative peroxiredoxin ycf42 OS=Pyropia yezoensis OX=2788 GN=ycf42 PE=3 SV=1
TRINITY_DN136785_c0_g1_i1	0	0	0	0	0	0	0	0	0	0	0	0	0	1	3	6	2	0	6	4	0	7	2	2	1	0	0	4	3	0	0		YCF42	PORPUPutative peroxiredoxin ycf42 OS=Porphyra purpurea OX=2787 GN=ycf42 PE=3 SV=1
TRINITY_DN120790_c0_g1_i1	0	3	2	5	1	0	0	0	0	0	0	0	0	0	0	0	0	0	0	0	0	0	0	0	0	0	0	0	0	0	0		YCF41	TRICVPutative single-stranded DNA-binding protein ycf41 OS=Trieres chinensis OX=1514140 GN=ycf41 PE=4 SV=1
TRINITY_DN128967_c0_g1_i1	0	0	0	1	0	1	0	0	0	0	0	0	0	0	0	0	0	0	0	0	0	0	0	0	0	0	0	0	0	0	0		YCF4	TRICVPhotosystem I assembly protein Ycf4 OS=Trieres chinensis OX=1514140 GN=ycf4 PE=3 SV=1
TRINITY_DN21037_c1_g1_i2	2	10.7	3	27.55	15.28	10	0	0	1	0	0	1	0	3	0	0	0	0	0	0	0	0	0	0	0	0	0	0	0	0	0		YCF4	THAPSPhotosystem I assembly protein Ycf4 OS=Thalassiosira pseudonana OX=35128 GN=ycf4 PE=3 SV=1
TRINITY_DN21037_c1_g1_i1	1	2.3	0	2.45	1.72	0	0	0	0	0	0	0	1	0	0	0	0	0	0	0	0	0	0	0	0	0	0	0	0	0	0		YCF4	THAPSPhotosystem I assembly protein Ycf4 OS=Thalassiosira pseudonana OX=35128 GN=ycf4 PE=3 SV=1
TRINITY_DN37904_c0_g1_i1	0	0	0	1	0	0	0	0	0	0	0	0	0	0	0	2	0	0	1	0	0	0	0	0	0	0	0	0	0	0	0		YCF4	THAPSPhotosystem I assembly protein Ycf4 OS=Thalassiosira pseudonana OX=35128 GN=ycf4 PE=3 SV=1
TRINITY_DN2914_c0_g1_i2	1.22	1.4	3.32	8.68	0	0	1.2	1	0	0	4.18	1.32	0	5.28	0	6.22	0	0	8.54	0	0	0	1	1	0	0	0	0	0	0	0		YCF4	PHATCPhotosystem I assembly protein Ycf4 OS=Phaeodactylum tricornutum (strain CCAP 1055/1) OX=556484 GN=ycf4 PE=3 SV=1
TRINITY_DN21037_c0_g1_i1	0	0	1	3	1	1	1	0	0	0	1	1	0	3	0	0	0	0	0	0	0	0	0	0	0	0	0	0	0	0	0		YCF4	PHATCPhotosystem I assembly protein Ycf4 OS=Phaeodactylum tricornutum (strain CCAP 1055/1) OX=556484 GN=ycf4 PE=3 SV=1
TRINITY_DN2914_c0_g1_i4	10.56	26.4	31.52	211.8	81.2	67.77	5.21	1	1	3.6	0	4.78	1	10.06	0	0	0	0	1.06	0	0	0	0	0	0	0	0	0	1	0	0		YCF4	PHATCPhotosystem I assembly protein Ycf4 OS=Phaeodactylum tricornutum (strain CCAP 1055/1) OX=556484 GN=ycf4 PE=3 SV=1
TRINITY_DN2914_c0_g1_i3	7.22	15.99	22.01	47.46	5.51	1.23	7.59	0	2	2.4	13.55	2.54	1	17.99	1	22.63	0	0	22.3	0	0	1	2	2	4.79	0	2	4	0	0	0		YCF4	PHATCPhotosystem I assembly protein Ycf4 OS=Phaeodactylum tricornutum (strain CCAP 1055/1) OX=556484 GN=ycf4 PE=3 SV=1
TRINITY_DN2914_c0_g1_i6	2	2.21	4.16	43.07	6.29	2	3	2	0	2	6.27	4.37	1	39.67	1	6.15	4	0	1.1	1	0	0	0	1.11	1.21	0	0	0	0	0	0		YCF4	PHATCPhotosystem I assembly protein Ycf4 OS=Phaeodactylum tricornutum (strain CCAP 1055/1) OX=556484 GN=ycf4 PE=3 SV=1
TRINITY_DN133581_c0_g1_i1	0	0	0	0	0	0	0	0	0	0	0	0	1	0	0	1	0	0	0	1	0	0	0	0	0	0	0	0	0	0	0		YCF4	OLTVIPhotosystem I assembly protein Ycf4 OS=Oltmannsiellopsis viridis OX=51324 GN=ycf4 PE=3 SV=1
TRINITY_DN46270_c0_g1_i1	0	0	0	1	0	0	0	0	0	0	0	0	0	2	0	0	0	0	0	0	0	0	0	0	0	0	0	0	0	0	0		YCF39	TRICVUncharacterized protein ycf39 OS=Trieres chinensis OX=1514140 GN=ycf39 PE=3 SV=1
TRINITY_DN138053_c0_g1_i1	0	0	0	0	0	0	0	0	0	1	0	0	0	1	0	0	0	0	0	0	0	0	0	0	0	0	0	0	0	0	0		YCF39	TRICVUncharacterized protein ycf39 OS=Trieres chinensis OX=1514140 GN=ycf39 PE=3 SV=1
TRINITY_DN144032_c0_g1_i1	0	0	0	0	0	0	0	0	0	0	0	0	0	0	1	0	0	0	0	0	0	0	0	1	0	0	0	0	1	0	0		YCF39	TRICVUncharacterized protein ycf39 OS=Trieres chinensis OX=1514140 GN=ycf39 PE=3 SV=1
TRINITY_DN93352_c0_g1_i1	0	0	0	2	3	1	0	0	0	0	1	0	0	0	0	0	0	0	0	0	0	0	0	0	0	0	0	0	0	0	0		YCF39	TRICVUncharacterized protein ycf39 OS=Trieres chinensis OX=1514140 GN=ycf39 PE=3 SV=1
TRINITY_DN63328_c0_g1_i1	0	0	0	0	0	0	1	0	0	0	0	0	0	0	0	5	0	0	1	1	1	0	2	0	0	0	0	0	0	0	0		YCF39	CYAPAUncharacterized protein ycf39 OS=Cyanophora paradoxa OX=2762 GN=ycf39 PE=3 SV=1
TRINITY_DN146879_c0_g1_i1	0	0	0	0	0	0	0	0	0	0	0	0	0	0	1	0	0	0	0	0	0	0	0	0	0	0	0	0	0	0	0		YCF39	CYAPAUncharacterized protein ycf39 OS=Cyanophora paradoxa OX=2762 GN=ycf39 PE=3 SV=1
TRINITY_DN139355_c0_g1_i1	0	0	0	0	0	0	0	0	0	0	0	0	0	0	0	0	1	0	2	2	0	0	0	0	1	0	0	0	0	0	0		YCF38	CYAPAPutative transport permease ycf38 OS=Cyanophora paradoxa OX=2762 GN=ycf38 PE=3 SV=1
TRINITY_DN41545_c0_g1_i1	0	0	0	0	0	0	0	0	0	0	0	0	0	1	0	0	0	0	0	0	0	0	0	0	0	0	0	0	0	0	0		YCF35	TRICVUncharacterized protein ycf35 OS=Trieres chinensis OX=1514140 GN=ycf35 PE=3 SV=1
TRINITY_DN61350_c0_g1_i1	0	0	0	1	0	0	0	0	0	0	0	0	0	0	0	0	0	0	1	0	0	0	0	0	0	0	0	0	0	0	0		YCF35	TRICVUncharacterized protein ycf35 OS=Trieres chinensis OX=1514140 GN=ycf35 PE=3 SV=1
TRINITY_DN41545_c0_g1_i3	0	0	0	4	2	0	0	0	0	0	2	1	0	2	0	0	0	0	0	0	0	0	0	0	0	0	0	0	0	0	0		YCF35	TRICVUncharacterized protein ycf35 OS=Trieres chinensis OX=1514140 GN=ycf35 PE=3 SV=1
TRINITY_DN22352_c0_g1_i1	0	0	1	1	0	0	0	0	1	0	0	0	0	0	0	1	0	0	0	0	0	0	0	0	0	0	0	0	0	0	0		YCF35	SKECOUncharacterized protein ycf35 OS=Skeletonema costatum OX=2843 GN=ycf35 PE=3 SV=1
TRINITY_DN37657_c0_g1_i1	0	1	0	1.15	0	1	0	0	0	0	0	0	0	0	0	0	0	0	0	0	0	0	0	0	0	0	0	0	0	0	0		YCF35	SKECOUncharacterized protein ycf35 OS=Skeletonema costatum OX=2843 GN=ycf35 PE=3 SV=1
TRINITY_DN17154_c1_g1_i1	0	2	3	3	0	1	0	0	0	0	0	0	0	0	0	0	0	0	0	0	0	0	0	0	0	0	0	0	0	0	0		YCF35	SKECOUncharacterized protein ycf35 OS=Skeletonema costatum OX=2843 GN=ycf35 PE=3 SV=1
TRINITY_DN22352_c0_g1_i2	0	0	1	0	0	0	0	0	0	0	1	0	0	0	0	0	0	0	7	0	0	0	0	0	0	0	0	0	0	0	0		YCF35	SKECOUncharacterized protein ycf35 OS=Skeletonema costatum OX=2843 GN=ycf35 PE=3 SV=1
TRINITY_DN37657_c0_g1_i2	0	1	3	7.85	2	0	0	0	1	0	0	0	1	2	0	0	0	0	0	0	0	0	0	0	0	0	0	0	0	0	0		YCF35	SKECOUncharacterized protein ycf35 OS=Skeletonema costatum OX=2843 GN=ycf35 PE=3 SV=1
TRINITY_DN79389_c0_g1_i1	0	0	0	0	0	0	0	0	0	0	0	0	0	0	0	0	0	0	0	0	1	0	0	0	0	0	0	0	0	0	0		YCF35	PORPUUncharacterized protein ycf35 OS=Porphyra purpurea OX=2787 GN=ycf35 PE=3 SV=1
TRINITY_DN39653_c0_g1_i1	0	0	0	0	0	0	0	0	0	1	0	0	1	0	0	0	0	0	0	0	1	1	0	0	0	0	1	0	0	0	0		YCF3	TETOBPhotosystem I assembly protein Ycf3 OS=Tetradesmus obliquus OX=3088 GN=ycf3 PE=3 SV=1
TRINITY_DN49228_c0_g1_i1	0	0	0	0	0	0	0	0	0	1	0	0	0	0	0	0	0	0	0	0	0	0	0	0	0	0	0	0	0	0	0		YCF3	SYNE7Photosystem I assembly protein Ycf3 OS=Synechococcus elongatus (strain PCC 7942) OX=1140 GN=ycf3 PE=3 SV=1
TRINITY_DN125063_c0_g1_i1	0	1	0	0	0	0	0	0	0	0	0	0	1	0	0	2	1	1	0	2	0	0	0	0	0	0	0	0	1	0	0		YCF3	STIHEPhotosystem I assembly protein Ycf3 OS=Stigeoclonium helveticum OX=55999 GN=ycf3 PE=3 SV=1
TRINITY_DN79860_c0_g1_i1	0	0	0	2	0	0	0	0	0	1	0	0	0	0	0	0	0	0	0	0	0	0	0	0	0	0	0	0	0	0	0		YCF3	PHATCPhotosystem I assembly protein Ycf3 OS=Phaeodactylum tricornutum (strain CCAP 1055/1) OX=556484 GN=ycf3 PE=3 SV=1
TRINITY_DN71899_c0_g1_i1	0	0	0	0	1	0	0	0	0	0	0	0	0	3	0	0	0	0	0	0	0	0	0	0	0	0	0	0	0	0	0		YCF3	PHATCPhotosystem I assembly protein Ycf3 OS=Phaeodactylum tricornutum (strain CCAP 1055/1) OX=556484 GN=ycf3 PE=3 SV=1
TRINITY_DN63588_c0_g1_i1	2	0	0	0	0	0	0	0	0	0	0	0	0	0	0	0	0	0	0	0	0	0	0	0	0	0	0	0	0	0	0		YCF3	OSTTAPhotosystem I assembly protein Ycf3 OS=Ostreococcus tauri OX=70448 GN=ycf3 PE=3 SV=1
TRINITY_DN8520_c0_g1_i1	0	0	0	0	10.25	0	0	0	0	0	31.68	0	0	8.04	0	0	2.53	4	0	0	0	0	0	1	0	0	0	0.81	0	0	0		YCF3	CHLVUPhotosystem I assembly protein Ycf3 OS=Chlorella vulgaris OX=3077 GN=ycf3 PE=3 SV=1
TRINITY_DN8520_c0_g1_i2	0	0	0	8	7.75	0	0	0	0	0	49.32	0	0	37.96	0	0	1.47	0	0	1	0	0	1	0	0	0	0	2.19	1	0	0		YCF3	CHAGLPhotosystem I assembly protein Ycf3 OS=Chaetosphaeridium globosum OX=96477 GN=ycf3 PE=3 SV=1
TRINITY_DN106586_c0_g1_i1	0	0	0	0	0	0	0	0	0	0	0	0	0	0	0	0	0	0	0	0	0	0	0	0	0	0	0	0	0	0	0		YCF27	PYRYEProbable transcriptional regulator ycf27 OS=Pyropia yezoensis OX=2788 GN=ycf27 PE=3 SV=2
TRINITY_DN63637_c0_g1_i1	0	0	0	0	0	0	0	1	0	0	0	0	0	0	1	3	3	0	2	1	2	4	2	3	1	1	0	0	0	0	0		YCF27	PYRYEProbable transcriptional regulator ycf27 OS=Pyropia yezoensis OX=2788 GN=ycf27 PE=3 SV=2
TRINITY_DN89536_c0_g1_i1	0	0	0	0	0	0	0	0	0	0	0	0	0	0	1	0	0	0	0	1	1	1	0	0	0	0	0	0	0	0	0		YCF27	PORPUProbable transcriptional regulator ycf27 OS=Porphyra purpurea OX=2787 GN=ycf27 PE=3 SV=1
TRINITY_DN84627_c0_g1_i1	0	0	0	0	1	0	1	0	0	0	0	0	0	0	0	0	0	0	0	0	0	0	0	0	0	0	0	0	0	0	0		YCF24	TRICVUPF0051 protein ycf24 OS=Trieres chinensis OX=1514140 GN=ycf24 PE=3 SV=1
TRINITY_DN110168_c0_g1_i1	0	1	1	1	0	1	0	0	0	0	0	1	0	0	0	0	0	0	0	0	0	0	0	0	0	0	0	0	0	0	0		YCF24	TRICVUPF0051 protein ycf24 OS=Trieres chinensis OX=1514140 GN=ycf24 PE=3 SV=1
TRINITY_DN110227_c0_g1_i1	0	0	0	0	0	0	0	0	0	0	0	0	0	1	0	0	0	0	0	0	0	0	1	0	0	0	0	0	0	0	0		YCF24	TRICVUPF0051 protein ycf24 OS=Trieres chinensis OX=1514140 GN=ycf24 PE=3 SV=1
TRINITY_DN50874_c1_g1_i1	0	0	0	1	0	0	0	0	0	0	0	0	0	0	0	0	0	0	0	0	0	0	0	0	0	0	0	0	0	0	0		YCF24	TRICVUPF0051 protein ycf24 OS=Trieres chinensis OX=1514140 GN=ycf24 PE=3 SV=1
TRINITY_DN50874_c0_g1_i1	0	1	0	0	1	0	0	0	0	0	0	0	0	0	0	0	0	0	0	0	0	0	0	0	0	0	0	0	0	0	0		YCF24	TRICVUPF0051 protein ycf24 OS=Trieres chinensis OX=1514140 GN=ycf24 PE=3 SV=1
TRINITY_DN140547_c0_g1_i1	1	0	1	0	0	0	0	0	0	0	0	0	0	0	0	0	0	0	0	0	0	0	0	0	0	0	0	0	0	0	0		YCF24	PYRYEUPF0051 protein ycf24 OS=Pyropia yezoensis OX=2788 GN=ycf24 PE=3 SV=1
TRINITY_DN145090_c0_g1_i1	0	4	0	0	0	0	0	0	0	0	0	0	0	0	0	0	0	0	0	0	0	0	0	0	0	0	0	0	0	0	0		YCF24	PYRYEUPF0051 protein ycf24 OS=Pyropia yezoensis OX=2788 GN=ycf24 PE=3 SV=1
TRINITY_DN124846_c0_g1_i1	0	0	0	0	1	0	0	0	0	0	0	0	1	0	0	0	0	0	0	0	0	0	0	0	0	0	0	0	0	0	0		YCF24	CYAPAUPF0051 protein ycf24 OS=Cyanophora paradoxa OX=2762 GN=ycf24 PE=3 SV=1
TRINITY_DN141148_c0_g1_i1	0	0	0	0	0	0	4	1	0	0	0	0	0	0	0	0	1	0	0	1	0	0	1	0	0	0	0	0	1	0	0		YCF24	CYAPAUPF0051 protein ycf24 OS=Cyanophora paradoxa OX=2762 GN=ycf24 PE=3 SV=1
TRINITY_DN120600_c0_g1_i1	0	0	0	0	0	0	0	0	0	0	0	0	0	0	0	2	0	0	0	0	1	1	0	0	0	0	1	0	0	0	0		YCF23	PYRYEUncharacterized protein ycf23 OS=Pyropia yezoensis OX=2788 GN=ycf23 PE=3 SV=1
TRINITY_DN20610_c0_g2_i1	0	0	1	0	0	0	0	0	0	0	2	0	0	0	0	0	0	0	0	0	0	0	0	0	0	0	0	0	0	0	0		YCF21	PORPUUncharacterized protein ycf21 OS=Porphyra purpurea OX=2787 GN=ycf21 PE=3 SV=1
TRINITY_DN96082_c0_g1_i1	0	0	0	0	0	0	0	0	0	0	2	0	0	0	0	0	0	0	0	0	0	0	0	0	0	0	0	0	0	0	0		YCF19	GUITHUncharacterized protein ycf19 OS=Guillardia theta OX=55529 GN=ycf19 PE=3 SV=1
TRINITY_DN41042_c0_g1_i1	0	0	0	0	0	0	0	0	0	0	0	0	1	0	0	0	0	0	1	1	0	0	1	0	0	0	0	0	0	0	0		YCF17	CYAPAUncharacterized protein ycf17 OS=Cyanophora paradoxa OX=2762 GN=ycf17 PE=3 SV=1
TRINITY_DN121857_c0_g1_i1	0	0	0	0	0	0	0	0	0	0	0	0	0	0	1	1	0	0	0	0	0	0	0	0	0	0	0	0	0	0	0		YCF17	CYAPAUncharacterized protein ycf17 OS=Cyanophora paradoxa OX=2762 GN=ycf17 PE=3 SV=1
TRINITY_DN125221_c0_g1_i1	0	0	0	0	1	0	0	0	0	0	0	0	0	0	2	0	0	0	0	0	0	1	0	1	0	0	0	1	0	0	0		YCF17	CYAPAUncharacterized protein ycf17 OS=Cyanophora paradoxa OX=2762 GN=ycf17 PE=3 SV=1
TRINITY_DN89692_c0_g1_i1	0	0	0	0	0	0	0	0	0	0	0	0	0	0	5	3	0	0	3	0	3	7	0	2	0	0	0	0	1	0	0		YCF17	CYAPAUncharacterized protein ycf17 OS=Cyanophora paradoxa OX=2762 GN=ycf17 PE=3 SV=1
TRINITY_DN58265_c0_g1_i1	1	0	0	1	0	0	0	0	0	0	0	0	0	0	0	1	0	0	1	1	0	0	0	0	0	0	0	0	0	0	0		YCF17	CYAPAUncharacterized protein ycf17 OS=Cyanophora paradoxa OX=2762 GN=ycf17 PE=3 SV=1
TRINITY_DN106899_c0_g1_i1	0	0	0	1	0	0	0	0	0	0	0	0	0	0	0	0	0	0	0	0	0	1	0	0	0	0	0	0	0	0	0		YCF17	CYAPAUncharacterized protein ycf17 OS=Cyanophora paradoxa OX=2762 GN=ycf17 PE=3 SV=1
TRINITY_DN100107_c0_g1_i1	0	1	0	0	0	0	0	0	0	0	0	0	0	0	0	1	0	0	0	2	0	0	0	1	0	0	0	0	0	0	0		YCF17	CYAPAUncharacterized protein ycf17 OS=Cyanophora paradoxa OX=2762 GN=ycf17 PE=3 SV=1
TRINITY_DN71411_c0_g1_i1	0	0	0	0	0	0	0	0	0	0	0	0	0	0	1	0	0	0	1	0	0	0	0	1	0	0	1	0	0	0	0		YCF12	SYNS3Photosystem II reaction center protein Ycf12 OS=Synechococcus sp. (strain CC9311) OX=64471 GN=ycf12 PE=3 SV=2
TRINITY_DN41614_c0_g1_i1	0	0	0	0	0	0	0	2	0	0	0	0	1	1	0	1	0	0	1	0	0	0	0	0	0	0	0	0	0	0	0		YCF12	SYNPXPhotosystem II reaction center protein Ycf12 OS=Synechococcus sp. (strain WH8102) OX=84588 GN=ycf12 PE=3 SV=1
TRINITY_DN41614_c0_g2_i1	0	0	0	0	1	0	0	0	0	0	0	0	0	0	0	0	1	0	0	0	0	0	0	0	0	0	0	0	0	0	0		YCF12	SYNPXPhotosystem II reaction center protein Ycf12 OS=Synechococcus sp. (strain WH8102) OX=84588 GN=ycf12 PE=3 SV=1
TRINITY_DN48207_c0_g2_i1	1	0	0	0	2	5	0	0	2	0	0	0	1	0	0	0	0	0	0	3	0	0	0	0	0	0	0	0	1	0	0		YCED	HAEINLarge ribosomal RNA subunit accumulation protein YceD OS=Haemophilus influenzae (strain ATCC 51907 / DSM 11121 / KW20 / Rd) OX=71421 GN=yceD PE=3 SV=1
TRINITY_DN118033_c0_g1_i1	1	0	0	0	0	0	0	0	0	0	0	0	0	0	0	0	0	0	0	0	0	0	0	0	0	0	0	0	0	0	0		YCED	ECO57Large ribosomal RNA subunit accumulation protein YceD OS=Escherichia coli O157:H7 OX=83334 GN=yceD PE=3 SV=1
TRINITY_DN70344_c0_g1_i1	0	0	0	0	0	0	0	0	1	0	0	0	0	0	0	0	0	0	0	0	1	0	0	0	0	0	0	0	0	0	0		YCED	ECO57Large ribosomal RNA subunit accumulation protein YceD OS=Escherichia coli O157:H7 OX=83334 GN=yceD PE=3 SV=1
TRINITY_DN71171_c0_g1_i1	0	0	0	0	0	0	0	1	1	0	0	0	0	0	0	0	0	0	0	0	0	0	0	0	0	0	0	0	0	0	0		YCED	ECO57Large ribosomal RNA subunit accumulation protein YceD OS=Escherichia coli O157:H7 OX=83334 GN=yceD PE=3 SV=1
TRINITY_DN57714_c0_g1_i1	1	0	0	0	0	0	1	0	3	0	1	0	0	1	0	1	0	1	1	1	0	0	1	0	0	0	0	0	0	0	0		YCCM	ECOLIPutative electron transport protein YccM OS=Escherichia coli (strain K12) OX=83333 GN=yccM PE=1 SV=2
TRINITY_DN105346_c0_g1_i1	0	0	0	0	0	0	0	0	0	0	0	0	0	0	9	0	0	0	0	0	0	0	0	0	0	0	0	0	0	0	0		YCCK	BACSUUncharacterized oxidoreductase YccK OS=Bacillus subtilis (strain 168) OX=224308 GN=yccK PE=3 SV=2
TRINITY_DN61443_c0_g1_i1	0	1	0	0	0	0	1	0	0	2	0	0	2	0	0	1	0	0	0	1	0	0	0	2	0	0	0	0	0	0	0		YCCA	ECOL6Inner membrane protein YccA OS=Escherichia coli O6:H1 (strain CFT073 / ATCC 700928 / UPEC) OX=199310 GN=yccA PE=3 SV=1
TRINITY_DN88058_c0_g1_i1	0	0	0	1	2	0	0	0	0	0	0	0	0	0	0	0	0	0	0	0	0	0	0	0	0	0	0	0	0	0	0		YCCA	BACP3Uncharacterized protein in cccA 5'region (Fragment) OS=Bacillus sp. (strain PS3) OX=2334 PE=4 SV=1
TRINITY_DN100945_c0_g1_i1	0	0	0	0	0	0	0	0	0	1	1	0	0	0	0	0	0	0	0	0	0	0	0	0	0	0	0	0	0	0	0		YCBK	ECO57Uncharacterized protein YcbK OS=Escherichia coli O157:H7 OX=83334 GN=ycbK PE=3 SV=1
TRINITY_DN124550_c0_g1_i1	0	3	0	1	0	0	0	0	0	0	2	0	0	0	0	0	1	0	0	0	0	0	0	0	0	0	0	0	0	0	0		YCB2	SINSXUncharacterized 19.0 kDa protein in cobS 5'region OS=Sinorhizobium sp. OX=42445 PE=4 SV=1
TRINITY_DN108808_c0_g1_i1	0	0	0	0	0	0	0	0	0	0	0	0	0	0	8	0	0	0	0	0	0	0	0	0	0	0	0	0	0	0	0		YC91	CAEELUncharacterized MFS-type transporter C09D4.1 OS=Caenorhabditis elegans OX=6239 GN=C09D4.1 PE=3 SV=2
TRINITY_DN5185_c0_g1_i8	13	0	1.5	0	3.16	0	0	6	2.39	0	4.88	2	2.11	0	0	5.58	3.08	1	2.8	3.1	0.41	5	5	8.34	2	0	4	2.82	6	0	0		YC91	CAEELUncharacterized MFS-type transporter C09D4.1 OS=Caenorhabditis elegans OX=6239 GN=C09D4.1 PE=3 SV=2
TRINITY_DN5185_c0_g1_i3	0	0	2.28	2.02	2.84	0	0	0	1.72	3.44	2.2	0	3.88	0	0	0	0	0	0	3.9	3.59	0	0	3.66	0	0	0	0	0	2	0		YC91	CAEELUncharacterized MFS-type transporter C09D4.1 OS=Caenorhabditis elegans OX=6239 GN=C09D4.1 PE=3 SV=2
TRINITY_DN2782_c0_g1_i67	0	0	0	2.69	7.12	1.71	8.82	0	1.58	0	2.01	0.18	7.01	7.96	0	0	7.96	3.03	38.08	0	0	0	5.76	3.91	0	3.38	12.73	12.68	0	0	0		YC91	CAEELUncharacterized MFS-type transporter C09D4.1 OS=Caenorhabditis elegans OX=6239 GN=C09D4.1 PE=3 SV=2
TRINITY_DN5185_c0_g1_i7	0	7	6.22	1.83	0	0	0	0	1.89	0	2.92	0	0	5	0	0.42	1.92	0	1.2	0	0	0	0	0	0	3.24	0	0.18	0	0	0		YC91	CAEELUncharacterized MFS-type transporter C09D4.1 OS=Caenorhabditis elegans OX=6239 GN=C09D4.1 PE=3 SV=2
TRINITY_DN2782_c0_g1_i43	0	9.61	16.29	12.38	0	0	3.52	0	10.21	0	0	0	0	0	1.33	0	5.44	0	0	0	0	0	0	0	0	0	0	0	12.95	0	0		YC91	CAEELUncharacterized MFS-type transporter C09D4.1 OS=Caenorhabditis elegans OX=6239 GN=C09D4.1 PE=3 SV=2
TRINITY_DN5185_c0_g1_i9	0	0	0	7.15	0	7	5	0	0	6.56	0	0	15.01	0	0	0	0	0	0	0	0	0	0	0	0	4.76	0	0	0	0	0		YC91	CAEELUncharacterized MFS-type transporter C09D4.1 OS=Caenorhabditis elegans OX=6239 GN=C09D4.1 PE=3 SV=2
TRINITY_DN2782_c0_g1_i29	6.26	0	0	0	0	4.2	0	0	0	0	0	0	0	0	0	5.51	0	0	0	21.08	9.76	0	0	0	0	0	0	0	0	0	14.38		YC91	CAEELUncharacterized MFS-type transporter C09D4.1 OS=Caenorhabditis elegans OX=6239 GN=C09D4.1 PE=3 SV=2
TRINITY_DN54877_c0_g1_i2	0	0	0	0	0	0	0	0	0	0	0	0	0	0	0	0	0	0	0	0	0	0	0	0	1	0	0	0	0	0	0		YC66L	SYNY3Ycf66-like protein OS=Synechocystis sp. (strain PCC 6803 / Kazusa) OX=1111708 GN=slr0503 PE=3 SV=1
TRINITY_DN54877_c0_g1_i1	0	0	0	0	0	0	0	0	0	0	0	0	0	0	0	0	1	0	0	1	0	0	2	0	0	0	0	0	0	0	0		YC66L	SYNY3Ycf66-like protein OS=Synechocystis sp. (strain PCC 6803 / Kazusa) OX=1111708 GN=slr0503 PE=3 SV=1
TRINITY_DN128164_c0_g1_i1	0	0	0	0	0	0	0	0	0	0	0	0	0	0	0	0	1	0	0	0	1	0	0	0	0	0	0	0	0	0	0		YC64L	SYNY3Uncharacterized monothiol glutaredoxin ycf64-like OS=Synechocystis sp. (strain PCC 6803 / Kazusa) OX=1111708 GN=slr1846 PE=3 SV=1
TRINITY_DN49295_c0_g1_i1	3	3	0	13	1	2	0	0	0	0	1	0	0	0	0	0	0	0	0	0	0	0	0	0	0	0	0	0	0	0	0		YC21B	YEASTTransposon Ty2-C Gag-Pol polyprotein OS=Saccharomyces cerevisiae (strain ATCC 204508 / S288c) OX=559292 GN=TY2B-C PE=3 SV=2
TRINITY_DN116067_c0_g1_i1	0	0	0	0	0	0	0	0	0	0	0	0	0	0	1	0	0	0	0	0	0	0	0	0	0	0	0	0	0	0	0		YC0H	SCHPOHD domain-containing protein C4G3.17 OS=Schizosaccharomyces pombe (strain 972 / ATCC 24843) OX=284812 GN=SPCC4G3.17 PE=3 SV=1
TRINITY_DN78538_c0_g1_i1	0	1	0	1	2	0	0	0	0	0	0	0	0	0	0	0	0	0	0	0	0	0	0	0	0	0	0	0	0	0	0		YC04	KLEPNPutative capsule polysaccharide export protein OS=Klebsiella pneumoniae OX=573 PE=3 SV=1
TRINITY_DN2900_c0_g1_i4	0	19.39	0	0	0	0	0	0	28.32	0	0	0	47.4	44.33	0	38.19	0	0	53.9	36.01	19.34	23.3	46.66	17.95	0	31.59	26.75	37.85	95.61	35.46	10.84		YC006	HUMANUncharacterized protein FLJ43738 OS=Homo sapiens OX=9606 PE=2 SV=1
TRINITY_DN121348_c0_g1_i1	0	0	0	0	0	0	0	0	0	0	0	0	0	0	4	0	0	0	0	0	0	0	0	0	0	0	0	0	0	0	0		YC006	HUMANUncharacterized protein FLJ43738 OS=Homo sapiens OX=9606 PE=2 SV=1
TRINITY_DN2900_c0_g1_i6	69.91	0	100.98	71.94	28.77	55.61	45.24	12.04	0	31.42	47.94	0	48.16	0	0	54.91	43.64	11.11	45.4	21.3	0	188.85	191.89	65.1	138.19	107.99	29.01	60.83	29.28	0	0		YC006	HUMANUncharacterized protein FLJ43738 OS=Homo sapiens OX=9606 PE=2 SV=1
TRINITY_DN2900_c0_g1_i7	0	27.15	0	0	0	33.39	0	8.82	17.93	0	19.95	15.09	39.32	34.81	0	24.12	0	0	15.08	66.87	41.26	96.72	0	17.29	0	0	60.1	42.93	0	25.06	37.83		YC006	HUMANUncharacterized protein FLJ43738 OS=Homo sapiens OX=9606 PE=2 SV=1
TRINITY_DN2900_c0_g1_i2	0	10.11	0	20.9	34.64	0	13.79	21.53	31.75	0	0	78.83	91.3	428.73	3	0	0	0	9.34	28.42	125.23	0	25.46	54.67	0	0	0	0	0	69.71	109.58		YC006	HUMANUncharacterized protein FLJ43738 OS=Homo sapiens OX=9606 PE=2 SV=1
TRINITY_DN10822_c0_g1_i2	2.14	0	1.99	0	0	1	0	0	0	0	0	0	0	0	0	0.95	0	0	1.49	0	0	0	0	0	0	1	0	0	0	0	0		YBOXH	APLCAY-box factor homolog OS=Aplysia californica OX=6500 PE=2 SV=1
TRINITY_DN10822_c0_g1_i1	1	0	0	0	0	0	0	0	3	0	0	0	0	0	0	0	0	0	6.51	0	0	0	0	0	1	0	0	0	0	0	0		YBOXH	APLCAY-box factor homolog OS=Aplysia californica OX=6500 PE=2 SV=1
TRINITY_DN83267_c0_g1_i1	0	0	0	0	1	0	0	0	0	0	0	0	0	0	0	0	3	0	0	1	0	0	0	0	0	0	0	0	0	0	0		YBOXH	APLCAY-box factor homolog OS=Aplysia californica OX=6500 PE=2 SV=1
TRINITY_DN17051_c1_g1_i31	22.18	0	4.78	12.8	0	2.4	30.58	0	58.86	8.41	13.18	4.96	0	3.33	0	53.8	51.95	0	52.75	0	0	0	1.69	55.62	46.43	117.41	38.35	69.15	2.3	4.38	15.74		YBOXH	APLCAY-box factor homolog OS=Aplysia californica OX=6500 PE=2 SV=1
TRINITY_DN134788_c0_g1_i1	0	0	0	0	29	0	0	0	0	0	0	0	0	0	0	0	0	0	0	0	0	0	0	0	0	0	0	0	0	0	0		YBOXH	APLCAY-box factor homolog OS=Aplysia californica OX=6500 PE=2 SV=1
TRINITY_DN17051_c1_g1_i24	0	0	0	410	0	0	0	0	100.28	0	0	0	0	0	0	0	0	43.71	10.56	0	0	0	0	0	0	11.04	0	0	107.55	10.52	30		YBOX1	XENLAY-box-binding protein 1 OS=Xenopus laevis OX=8355 GN=ybx1 PE=2 SV=1
[truncated: 73,527 more rows]
[truncated: 1 more columns]

## Sheet: D. RSEM microbial
Contig	Hp_16	Hp_17	Hp_26	Hp_20	Hp_27	Hp_30	Hp_43	Hp_35	Hp_31	Hp_33	Hp_37	Hp_40	Hp_41	Hp_42	Hp_58	Hp_48	Hp_53	Hp_52	Hp_46	Hp_47	Hp_50	Hp_55	Hp_56	Hp_66	Hp_61	Hp_69	Hp_68	Hp_71	Hp_74	Contig	KO	code	description	KO_description	lineage	phylum	class
[truncated: 58,940 more rows]
