# Supplementary material for: Phagocytosis of microbial symbionts supports embryonic nutrition in the sponge Halichondria panicea
Source: Research Square preprint supplement (doi:10.21203/rs.3.rs-7749905/v1), 2025-12-02
Supplement: Supplementary file 4 [file 31b1efe6771ecc160fe25763.xlsx]

## Sheet: Datasheet
Sample_ID	Date	Month	Status3	Status_details	Status_fine	Status_for_publication	log10_16s	log10_susy
Hp16	2024-03-22	Mar	Non_reprodctive	NR	NR	NR	6.68923	6.61294
Hp17	2024-03-22	Mar	Non_reprodctive	NR	NR	NR	6.51127	6.71337
Hp19	2024-03-22	Mar	Non_reprodctive	NR	NR	NR	6.51229	6.70396
Hp20	2024-03-22	Mar	oocytes	oocytes	mid oocytes	mid oocytes	6.83283	6.45815
Hp21	2024-03-22	Mar	Non_reprodctive	NR	NR	NR	6.57632	6.47063
Hp22	2024-03-22	Mar	oocytes	oocytes	mid oocytes	mid oocytes	6.15906	6.35606
Hp23	2024-03-22	Mar	sperm	sperm	sperm	sperm	6.35234	6.09661
Hp24	2024-03-22	Mar	Non_reprodctive	NR	NR	NR	6.59387	6.38686
Hp25	2024-03-22	Mar	Non_reprodctive	NR	NR	NR	6.07567	6.25147
Hp26	2024-03-22	Mar	oocytes	oocytes	mid oocytes	mid oocytes	6.69398	6.38703
Hp27	2024-03-22	Mar	oocytes	oocytes	mid oocytes	mid oocytes	6.62351	6.50636
Hp29	2024-03-22	Mar	sperm	sperm	sperm	sperm	6.40727	6.33462
Hp30	2024-03-22	Mar	oocytes	oocytes	mid oocytes	mid oocytes	6.20572	6.50142
Hp31	2024-04-22	Apr	oocytes	oocytes	late oocytes	late oocytes	6.12516	6.40425
Hp32	2024-04-22	Apr	embryos	oocytes	late oocytes	late oocytes	6.43719	6.67337
Hp33	2024-04-22	Apr	oocytes	oocytes	late oocytes	late oocytes	6.02915	6.3474
Hp34	2024-04-22	Apr	Non_reprodctive	NR	NR	NR	6.14509	6.55116
Hp35	2024-04-22	Apr	oocytes	oocytes	late oocytes	late oocytes	5.96287	6.6355
Hp36	2024-04-22	Apr	embryos	oocytes	late oocytes	late oocytes	6.21694	6.4733
Hp37	2024-04-22	Apr	sperm	sperm	sperm	sperm	6.19776	6.28207
Hp38	2024-04-22	Apr	oocytes	oocytes	late oocytes	late oocytes	6.09144	6.32769
Hp39	2024-04-22	Apr	oocytes	oocytes	late oocytes	late oocytes	6.22593	6.6323
Hp40	2024-04-22	Apr	sperm	sperm	sperm	sperm	6.18603	6.72096
Hp41	2024-04-22	Apr	sperm	sperm	sperm	sperm	6.00874	6.52741
Hp42	2024-04-22	Apr	sperm	sperm	sperm	sperm	5.74966	6.33963
Hp43	2024-04-22	Apr	oocytes	oocytes	late oocytes	late oocytes	6.37459	6.68432
Hp45	2024-05-22	May	oocytes	oocytes	late oocytes	late oocytes	6.67564	6.31064
Hp46	2024-05-22	May	embryos	oocytes / embryos	late oocytes/early embryos/mid embryos	mid embryos	5.83341	6.31221
Hp47	2024-05-22	May	sperm	sperm	sperm	sperm	5.75149	6.4791
Hp48	2024-05-22	May	oocytes	oocytes	late oocytes	late oocytes	5.83741	6.09634
Hp49	2024-05-22	May	oocytes	oocytes	late oocytes	late oocytes	5.86567	6.13468
Hp50	2024-05-22	May	sperm	sperm	sperm	sperm	5.93351	6.52276
Hp51	2024-05-22	May	oocytes	oocytes	late oocytes	late oocytes	6.01375	6.52736
Hp52	2024-05-22	May	embryos	oocytes / embryos	late oocytes/early embryos/mid embryos	mid embryos	5.85383	6.40799
Hp53	2024-05-22	May	embryos	oocytes / embryos	late oocytes/early embryos/mid embryos	mid embryos	5.84823	6.42358
Hp54	2024-05-22	May	embryos	embryos	early embryos	early embryos	5.71078	5.97941
Hp55	2024-05-22	May	sperm	sperm	sperm	sperm	5.71434	6.33749
Hp56	2024-05-22	May	sperm	sperm	sperm	sperm	5.86952	6.35903
Hp57	2024-05-22	May	embryos	embryos	early embryos	early embryos	6.02053	6.23105
Hp58	2024-05-22	May	embryos	embryos	early embryos	early embryos	6.03988	6.26887
Hp59	2024-05-22	May	oocytes	oocytes	late oocytes	late oocytes	5.46952	6.3531
Hp60	2024-05-22	May	Non_reprodctive	NR	NR	NR	6.25773	6.55257
Hp61	2024-06-22	Jun	Non_reprodctive	NR	NR	NR	5.76101	6.47223
Hp64	2024-06-22	Jun	Non_reprodctive	NR	NR	NR	5.613	6.27983
Hp65	2024-06-22	Jun	larvae	embryos/larvae	late embryos/larvae	brooded larvae	5.44321	6.09076
Hp66	2024-06-22	Jun	Non_reprodctive	NR	NR	NR	5.60975	6.02519
Hp67	2024-06-22	Jun	embryos	embryos/larvae	late embryos/larvae	brooded larvae	5.05246	5.78183
Hp68	2024-06-22	Jun	larvae	embryos/larvae	late embryos/larvae	brooded larvae	5.0228	6.31406
Hp69	2024-06-22	Jun	Non_reprodctive	NR	NR	NR	5.51286	6.51877
Hp70	2024-06-22	Jun	Non_reprodctive	NR	NR	NR	5.46979	6.26929
Hp71	2024-06-22	Jun	larvae	embryos/larvae	late embryos/larvae	brooded larvae	5.47021	6.3287
Hp72	2024-06-22	Jun	larvae	embryos/larvae	late embryos/larvae	brooded larvae	5.38699	6.33458
Hp73	2024-06-22	Jun	Non_reprodctive	NR	NR	NR	5.64511	6.08387
Hp74	2024-06-22	Jun	larvae	embryos/larvae	late embryos/larvae	brooded larvae	5.36339	6.34428
Hp75	2024-06-22	Jun	Non_reprodctive	NR	NR	NR	5.50166	6.45102
Hp76	2024-07-22	Jul	Non_reprodctive	NR	NR	NR	5.68819	6.15141
Hp77	2024-07-22	Jul	Non_reprodctive	NR	NR	NR	5.8658	6.14202
Hp78	2024-07-22	Jul	Non_reprodctive	NR	NR	NR	5.43507	5.9208
Hp79	2024-07-22	Jul	Non_reprodctive	NR	NR	NR	5.21282	6.10306
Hp80	2024-07-22	Jul	Non_reprodctive	NR	NR	NR	5.74849	6.20802
Hp81	2024-07-22	Jul	Non_reprodctive	NR	NR	NR	5.45568	6.30521
Hp82	2024-07-22	Jul	Non_reprodctive	NR	NR	NR	5.85658	6.49117
Hp83	2024-07-22	Jul	Non_reprodctive	NR	NR	NR	6.04414	6.3516
Hp84	2024-07-22	Jul	Non_reprodctive	NR	NR	NR	6.04018	6.4217
Hp85	2024-07-22	Jul	Non_reprodctive	NR	NR	NR	5.82056	6.33854
Hp86	2024-07-22	Jul	Non_reprodctive	NR	NR	NR	5.81605	6.25138
Hp87	2024-07-22	Jul	Non_reprodctive	NR	NR	NR	5.74968	6.23642
Hp88	2024-07-22	Jul	Non_reprodctive	NR	NR	NR	5.63037	6.27156
Hp89	2024-07-22	Jul	Non_reprodctive	NR	NR	NR	5.94529	6.33843

## Sheet: Test
A. Candidatus H. symbioticus
contrast	estimate	SE	df	t.ratio	p.value
MarchNR.MarchMO	0.0814	0.0983	55	0.828	0.4111
MarchMO.MarchSP	0.2262	0.136	55	1.665	0.1015
MarchNR.MarchSP	0.3076	0.133	55	2.321	0.024
Apr Late Oocytes vs. Apr Sperm	0.0547	0.0994	55	0.551	0.584
May Late Oocytes vs. May Early Embryos	0.1246	0.119	55	1.051	0.2976
May Late Oocytes vs. May Mid Embryos	-0.0968	0.119	55	-0.817	0.4175
May Late Oocytes vs. May Sperm	-0.1402	0.109	55	-1.287	0.2034
May Early Embryos vs. May Mid Embryos	-0.2215	0.133	55	-1.671	0.1004
May Early Embryos vs. May Sperm	-0.2648	0.124	55	-2.136	0.0371
May Mid Eembryos vs. May Sperm	-0.0433	0.124	55	-0.35	0.728
JuneNR vs. June Brooded larvae	-0.101	0.0903	55	-1.118	0.2683
B. Bacteria
contrast	estimate	SE	df	t.ratio	p.value
MarchNR.MarchMO	0.00991	0.136	55	0.073	0.9423
MarchMO.MarchSP	0.12321	0.188	55	0.654	0.5159
MarchNR.MarchSP	0.1133	0.184	55	0.616	0.5403
Apr Late Oocytes vs. May Sperm	0.147	0.138	55	1.069	0.2899
May Late Oocytes vs. May Early Embryos	0.0487	0.164	55	0.296	0.7684
May Late Oocytes vs. May Mid Embryos	0.1272	0.164	55	0.774	0.4424
May Late Oocytes vs. May Sperm	0.1552	0.151	55	1.027	0.3088
May Early Embryos vs. May Mid Embryos	0.0786	0.184	55	0.427	0.6708
May Early Embryos vs. May Sperm	0.1065	0.172	55	0.619	0.5383
May Mid Eembryos vs. May Sperm	0.0279	0.172	55	0.162	0.8715
JuneNR vs. June Brooded larvae	-0.298	0.125	55	-2.377	0.021
