# Supplementary material for: Phagocytosis of microbial symbionts supports embryonic nutrition in the sponge Halichondria panicea
Source: Research Square preprint supplement (doi:10.21203/rs.3.rs-7749905/v1), 2025-12-02
Supplement: Supplementary file 5 [file 4c6f0590dbdc0cf60edba15c.xlsx]

## Sheet: S3A_phylum
Table S3A. Taxonomic composition at Phylum level for each month and reproductive condition ordered in descending mean total abundance (last column). Taxa with relative abundances < 0.05 are grouped as “Others”
Taxonomy	feb-22_Non_reprodctive	feb-22_Reproductive	mar-22_Non_reprodctive	mar-22_Reproductive	abr-22_Non_reprodctive	abr-22_Reproductive	may-22_Non_reprodctive	may-22_Reproductive	jun-22_Non_reprodctive	jun-22_Reproductive	jul-22_Non_reprodctive	total
Bacteria;Proteobacteria	59.726	43.9514	62.7435	59.4672	75.0053	70.689	75.0111	75.7608	83.2664	89.9739	85.1097	70.9731
Bacteria;Bacteroidota	3.62954	3.8341	26.9692	31.5796	16.8874	16.8735	10.1627	12.3612	7.63257	3.09521	7.68796	12.7921
Bacteria;Cyanobacteria	12.4124	17.1589	6.77351	5.33012	1.76984	4.62961	8.84494	6.52061	2.71007	3.34879	1.91671	6.49232
Bacteria;Actinobacteriota	12.9982	22.6655	1.417	1.59657	2.23412	3.10668	1.30253	1.78785	0.655713	0.206401	0.355183	4.39325
Bacteria;Verrucomicrobiota	3.93455	5.58252	0.941955	0.939526	1.44639	2.16016	1.25906	0.99535	0.991827	0.416484	0.92382	1.78106
Bacteria;Spirochaetota	0.368825	0.139808	0.099036	0.56215	0.19442	0.414616	0.894208	0.658982	2.38093	1.15983	1.85022	0.793002
Bacteria;Patescibacteria	1.47707	0.728696	0.183265	0.0657238	1.21683	0.712373	0.385687	0.16985	0.0635698	0.0665456	0.15243	0.474731
Bacteria;NA	0.170839	0.301764	0.402217	0.179918	0.161652	0.264533	0.223948	0.339993	0.811848	0.281118	0.608669	0.340591
Bacteria;Bdellovibrionota	0.490446	0.706199	0.048096	0.037574	0.690641	0.294882	0.322651	0.355853	0.128845	0.173356	0.288231	0.321525
Bacteria;Dependentiae	1.37893	1.75813	0.00554647	0.00331028	0	0.0164821	0	0.00368858	0.025329	0.00675387	0.0186735	0.292441
Bacteria;Firmicutes	0.601279	0.711581	0.104219	0.0133808	0.064422	0.168495	0.366604	0.303912	0.190371	0.208851	0.181196	0.264937
Bacteria;Campilobacterota	0.235184	0.306596	0.0438449	0.0512725	0.183706	0.245604	0.69773	0.371091	0.265238	0.202357	0.0394028	0.240184
Bacteria;Planctomycetota	0.750598	0.632416	0.115903	0.0677465	0.0461317	0.0901277	0.107473	0.0747876	0.0251667	0.0743478	0.0630472	0.186159
Bacteria;Margulisbacteria	0.00382636	0	0	0	0.00231278	0.0114219	0.0178709	0.0104862	0.315532	0.453622	0.359949	0.10682
Bacteria;Desulfobacterota	0.31178	0.272125	0.0126002	0.0151241	0.0208747	0.10243	0.076477	0.145954	0.13448	0.0231802	0.0123565	0.102489
Bacteria;Acidobacteriota	0.359501	0.21314	0.0549818	0.0173683	0	0.0205713	0.0605651	0.0350763	0.0665801	0.117931	0.162773	0.100772
Bacteria;Nitrospirota	0.414289	0.191532	0.0442224	0.0013009	0.0479735	0.0179681	0.124016	0.0214435	0.0413961	0.0146981	0.139555	0.0962177
Bacteria;NB1-j	0.441979	0.458973	0.00895476	0.0109035	0.00113153	0.0127484	0.0264427	0.00363702	0.00208954	0	0.0231166	0.0899979
Bacteria;Xothers	0.155441	0.192463	0.00766838	0.00527378	0.00206908	0.0280094	0.0248496	0.0278033	0.0491879	0.0168536	0.044859	0.0504071
Bacteria;Myxococcota	0.0282791	0.164478	0.0149353	0.0133454	0.00805297	0.0651669	0.0445971	0.026154	0.0239486	0.0605096	0.0233014	0.0429789
Bacteria;Fusobacteriota	0.0500667	0.000607696	0.000692214	0.00641966	0.00521581	0.0147519	0.0338148	0.0133309	0.151236	0.0820629	0	0.0325635
Bacteria;Chloroflexi	0.0329741	0	0.00574869	0.0176674	0	0.0589816	0.0127165	0.00758883	0.00563004	0.0172025	0.0388661	0.0179433
Bacteria;SAR324 clade(Marine group B)	0.0279204	0.0290824	0.0029362	0.0185267	0.0115639	0.00182783	0	0.00451653	0.0620164	0	0	0.0143991

## Sheet: S3B_class
Table S3B. Taxonomic composition at Class level for each month and reproductive conditiono rdered in descending mean total abundance (last column). Taxa with relative abundances < 0.05 are grouped as “Others”
Taxonomy	feb-22_Non_reprodctive	feb-22_oocytes	mar-22_Non_reprodctive	mar-22_oocytes	mar-22_sperm	abr-22_Non_reprodctive	abr-22_embryos	abr-22_oocytes	abr-22_sperm	may-22_Non_reprodctive	may-22_embryos	may-22_oocytes	may-22_sperm	jun-22_Non_reprodctive	jun-22_larvae	jul-22_Non_reprodctive	total
Bacteria;Proteobacteria;Alphaproteobacteria	45.7687	28.9711	55.3962	45.262	40.585	66.4015	55.151	59.6525	64.3126	68.0739	56.4386	69.0994	82.3279	64.1743	80.6631	62.1131	59.0244
Bacteria;Bacteroidota;Bacteroidia	4.18236	4.47283	27.4826	34.7886	39.0793	17.0856	20.847	17.9559	14.4751	10.8087	18.5982	12.9994	5.65654	8.46894	3.17415	7.75206	15.4892
Bacteria;Proteobacteria;Gammaproteobacteria	21.7513	23.1466	12.3626	14.7451	17.1816	9.52745	14.8674	12.6202	13.8758	11.9641	13.8537	9.89358	7.2957	19.6435	11.654	23.7623	14.8841
Bacteria;Actinobacteriota;Actinobacteria	13.8098	25.8931	0.981227	1.11123	0.713915	2.03697	3.33221	3.48961	1.91334	1.30579	2.36161	2.16644	0.666605	0.705007	0.205402	0.323648	3.81349
Bacteria;Verrucomicrobiota;Verrucomicrobiae	3.32745	5.0792	1.03143	1.0067	0.268259	1.4388	1.77922	2.31452	2.19505	1.22737	1.08387	1.07348	0.428704	1.08654	0.391316	0.886591	1.53866
Bacteria;Cyanobacteria;Cyanobacteriia	0.865995	1.57619	0.903631	0.805784	1.13794	0.489947	0.561856	0.852566	0.512792	2.62271	3.7214	2.36672	1.28681	0.800104	0.781979	0.955942	1.26515
Bacteria;Xothers	2.39208	1.85387	0.223842	0.220188	0.112496	0.229224	0.422985	0.609709	0.526615	0.535539	0.834509	0.389192	0.208408	0.599918	0.353976	0.37979	0.618271
Bacteria;Spirochaetota;Spirochaetia	0.193242	0.149584	0.0981644	0.5508	0.363448	0.158234	0.283973	0.344923	0.157323	0.435962	0.489476	0.17383	0.1575	1.07245	0.84365	1.32802	0.425036
Bacteria;NA;NA	0.206413	0.346016	0.406486	0.144474	0.203358	0.163756	0.746866	0.134714	0.198192	0.242634	0.375475	0.135773	0.548536	0.827739	0.28624	0.615252	0.34887
Bacteria;Spirochaetota;Leptospirae	0.0582341	0.0175287	0.0831072	0.0459719	0.0475943	0.037841	0.0636407	0.170168	0.178196	0.52743	0.617793	0.109067	0.413948	1.64455	0.352545	0.536491	0.306507
Bacteria;Patescibacteria;Parcubacteria	0.0355025	0	0.165787	0.102459	0	1.20208	0.830941	0.665291	0.723926	0.405223	0.267102	0.151361	0.0825049	0.047291	0.0548534	0.133454	0.304236
Bacteria;Bdellovibrionota;Bdellovibrionia	0.41991	0.803457	0.0525687	0.041685	0.017307	0.698949	0.331364	0.27088	0.329994	0.31124	0.60739	0.291414	0.11711	0.0513403	0.175163	0.287711	0.300468
Bacteria;Campilobacterota;Campylobacteria	0.265763	0.4368	0.0454018	0.058834	0.0562478	0.186071	0.283169	0.289771	0.177367	0.767683	0.279797	0.629636	0.281412	0.179329	0.208425	0.0398358	0.261596
Bacteria;Dependentiae;Babeliae	1.60845	2.26371	0.00625105	0.00568284	0	0	0.00399984	0.0308869	0.00433069	0	0.00251857	0.00936253	0	0.0217756	0.00705252	0.0189883	0.248938
Bacteria;Actinobacteriota;Acidimicrobiia	0.384183	0.275575	0.444796	0.994212	0.164417	0.17543	0.198083	0.175946	0.16211	0.0872245	0.0558421	0.10773	0.0538428	0.0125755	0.00578893	0.0267738	0.207783
Bacteria;Verrucomicrobiota;Chlamydiae	1.0676	1.72659	0.0196507	0.00202265	0.0259605	0.00353335	0.0123031	0.0271179	0.0591124	0.0440186	0.0231592	0.042662	0.0553079	0.0268342	0.0339732	0.0422484	0.200756
Bacteria;Firmicutes;Bacilli	0.115307	0.273017	0.0549794	0.00972815	0	0.0574557	0.16221	0.098613	0.0484725	0.301111	0.212269	0.162842	0.253684	0.139045	0.165212	0.125079	0.136189
Bacteria;Patescibacteria;Saccharimonadia	1.0827	0.699057	0.00184258	0.00202265	0	0.00228843	0.0263026	0.0185923	0.00851399	0.00221082	0	0	0	0.00459968	0.00556174	0.00631303	0.11625
Bacteria;Firmicutes;Clostridia	0.571367	0.535899	0.0527208	0.00340794	0.017307	0.00789759	0.00799968	0.103973	0.0594968	0.0981602	0.028669	0.134435	0.0720159	0.0383445	0.0491057	0.0531386	0.114621
Bacteria;Margulisbacteria;NA	0.00409639	0	0	0	0	0.00232223	0.00599976	0.00475964	0.0299355	0.0189119	0.0275005	0	0	0.350541	0.469481	0.362473	0.0797513
Bacteria;Nitrospirota;Nitrospiria	0.466126	0.212085	0.0454891	0	0	0.0489518	0	0.0371444	0	0.13431	0.0267698	0.0116654	0.0267497	0.0480559	0.0150372	0.141899	0.0758927
Bacteria;NB1-j;NA	0.485004	0.511098	0.00841395	0.0189624	0	0.00114422	0.0119995	0.0198948	0.00288713	0.0280073	0.00482695	0.00104447	0.00517263	0.00166991	0	0.0233075	0.0702145
Bacteria;Planctomycetota;Phycisphaerae	0.266273	0.305712	0.0905007	0.0736605	0.0216338	0.0445032	0.0566049	0.0596504	0.0456194	0.0122495	0.0610465	0.0437881	0.030899	0.00200389	0	0.00312753	0.0698295
Bacteria;Planctomycetota;Planctomycetes	0.464109	0.316622	0.00508513	0.00446278	0.00432676	0	0.00199992	0.0221728	0.0021285	0.00472701	0.000898311	0.0050826	0.00213998	0.018369	0	0.0145399	0.0541665
Bacteria;Acidobacteriota;Thermoanaerobaculia	0.208023	0.13443	0.0372475	0.00202265	0	0	0.0109104	0.0304783	0.00115452	0.040769	0.0275851	0.00208895	0.0284884	0.0351228	0.104016	0.0678639	0.0456375

## Sheet: S3C_class15
Table S3C. Top 15 taxa at class level for each month and reproductive condition ordered in descending mean total abundance (last column). Abundance of the dominant Ca.H. symbioticus is shown as a separate entity. All the other taxa are grouped as “Others”
Taxonomy	FEB_NR	FEB_early oocytes	MAR_NR	MAR_mid oocytes	MAR_sperm	APR_NR	APR_late oocytes	APR_sperm	MAY_NR	MAY_early embryos	MAY_late oocytes	MAY_late oocytes/early embryos/mid embryos	MAY_sperm	JUN_NR	JUN_late embryos/larvae	JUL_NR	total
Ca. H. symbioticus	37.0837	20.3598	46.775	36.5963	37.3801	60.318	51.3782	62.8799	58.4056	37.3097	65.6189	71.5417	79.5667	61.9922	79.5305	60.2814	54.1886
Bacteria;Bacteroidota;Bacteroidia	4.18236	4.47283	27.2531	31.9381	33.7896	19.7526	20.2862	12.4574	18.5577	22.6287	11.4635	9.42495	5.79423	8.46894	3.17415	7.75206	15.0873
Bacteria;Proteobacteria;Gammaproteobacteria	21.7513	23.1466	12.7729	13.373	14.5889	7.36762	12.8522	13.3152	12.9245	20.9456	8.98493	10.0005	7.02006	19.6435	11.654	23.7623	14.6315
Bacteria;Proteobacteria;Alphaproteobacteria	8.68503	8.61127	8.16045	13.2228	10.734	5.93168	5.85681	4.34027	3.89989	3.87541	4.79236	3.04059	2.13709	2.18214	1.1326	1.83166	5.52713
Bacteria;Actinobacteriota;Actinobacteria	13.8098	25.8931	1.0555	1.00649	0.756612	2.23525	3.48147	1.76585	0.919703	3.29557	1.90071	0.830078	0.745026	0.705007	0.205402	0.323648	3.68307
Bacteria;others	6.47477	5.11736	1.2107	1.17777	0.818443	1.24243	1.89569	1.56093	1.41935	2.29716	1.24267	0.884389	1.08519	1.29754	1.22303	1.33776	1.89282
Bacteria;Verrucomicrobiota;Verrucomicrobiae	3.32745	5.0792	1.01178	1.09852	0.503935	1.66592	2.10592	2.01427	0.583658	1.89119	1.07098	0.611931	0.689579	1.08654	0.391316	0.886591	1.50117
Bacteria;Cyanobacteria;Cyanobacteriia	0.865995	1.57619	0.946006	0.792384	1.02501	0.984407	0.750552	0.440298	2.06491	4.37973	2.83516	1.99507	1.55434	0.800104	0.781979	0.955942	1.42175
Bacteria;Spirochaetota;Spirochaetia	0.193242	0.149584	0.0868789	0.401595	0.18504	0	0.303734	0.146688	0.216661	0.8048	0.27276	0.257061	0.200405	1.07245	0.84365	1.32802	0.40391
Bacteria;unidentified	0.206413	0.346016	0.540384	0.161939	0.121579	0.0364595	0.298374	0.207724	0.442165	0.311903	0.205105	0.302847	0.424673	0.827739	0.28624	0.615252	0.333426
Bacteria;Spirochaetota;Leptospirae	0.0582341	0.0175287	0.0433563	0.124485	0.0254555	0.00280458	0.12627	0.139555	0.132649	1.27939	0.201578	0.251406	0.367969	1.64455	0.352545	0.536491	0.331516
Bacteria;Bdellovibrionota;Bdellovibrionia	0.41991	0.803457	0.0638964	0.042959	0.00865351	0.210343	0.338529	0.526014	0.075168	0.509989	0.411725	0.494237	0.0940253	0.0513403	0.175163	0.287711	0.28207
Bacteria;Campilobacterota;Campylobacteria	0.265763	0.4368	0.0439842	0.0569461	0.0463654	0.249607	0.285081	0.156657	0.331624	0.404989	0.943466	0.360438	0.278299	0.179329	0.208425	0.0398358	0.267976
Bacteria;Dependentiae;Babeliae	1.60845	2.26371	0.00937658	0.00340971	0	0	0.0203043	0.00324802	0	0	0.00561752	0.00335809	0	0.0217756	0.00705252	0.0189883	0.247831
Bacteria;Verrucomicrobiota;Chlamydiae	1.0676	1.72659	0.026674	0.00324935	0.0162969	0.00280458	0.0205966	0.0460223	0.0265299	0.065905	0.0505372	0.00142134	0.0423657	0.0268342	0.0339732	0.0422484	0.199978

## Sheet: S3D_alpha
Table S3D. Alpha diversity measures (Rihcness, Shannon and Inverse Simpson) for each sample. Information table for each indiviual is provided
Sample_ID	Month	Reproductive state	State details	Sex	Richness	shannonH	invSimp
Hp01	FEB	Reproductive	early oocytes	FEM	150	3.71388	12.7233
Hp02	FEB	Non_reprodctive	NR	NR	147	3.99138	23.0709
Hp03	FEB	Reproductive	early oocytes	FEM	123	3.49146	13.6803
Hp04	FEB	Non_reprodctive	NR	NR	134	3.6717	15.8022
Hp05	FEB	Reproductive	early oocytes	FEM	201	3.46631	10.011
Hp06	FEB	Non_reprodctive	NR	NR	126	4.17892	37.4537
Hp07	FEB	Non_reprodctive	NR	NR	140	3.62229	15.1672
Hp08	FEB	Reproductive	early oocytes	FEM	142	3.8923	21.984
Hp09	FEB	Non_reprodctive	NR	NR	318	4.09053	12.7925
Hp10	FEB	Reproductive	early oocytes	FEM	255	3.72725	8.56883
Hp11	FEB	Reproductive	early oocytes	FEM	255	2.19602	2.42666
Hp12	FEB	Non_reprodctive	NR	NR	338	2.45451	2.58024
Hp13	FEB	Non_reprodctive	NR	NR	325	2.61912	2.89477
Hp14	FEB	Non_reprodctive	NR	NR	253	1.63684	1.73394
Hp15	FEB	Non_reprodctive	NR	NR	297	1.86791	1.90231
Hp16	MAR	Non_reprodctive	NR	NR	323	3.25708	5.53616
Hp17	MAR	Non_reprodctive	NR	NR	325	3.01273	4.39154
Hp19	MAR	Non_reprodctive	NR	NR	335	3.103	4.68302
Hp20	MAR	Reproductive	mid oocytes	FEM	389	3.97321	15.8709
Hp21	MAR	Non_reprodctive	NR	NR	234	2.80985	4.0463
Hp22	MAR	Reproductive	mid oocytes	FEM	334	2.82993	3.45177
Hp23	MAR	Reproductive	sperm	MALE	293	3.19755	5.46708
Hp24	MAR	Non_reprodctive	NR	NR	317	3.46113	7.47043
Hp25	MAR	Non_reprodctive	NR	NR	319	2.36749	2.36223
Hp26	MAR	Reproductive	mid oocytes	FEM	343	3.51174	7.78197
Hp27	MAR	Reproductive	mid oocytes	FEM	338	3.53854	8.1129
Hp29	MAR	Reproductive	sperm	MALE	324	3.12544	6.75943
Hp30	MAR	Reproductive	mid oocytes	FEM	319	3.02042	5.28635
Hp31	APR	Reproductive	late oocytes	FEM	304	2.85276	3.50703
Hp32	APR	Reproductive	late oocytes	FEM	385	2.85772	3.50436
Hp33	APR	Reproductive	late oocytes	FEM	305	2.55914	3.06519
Hp34	APR	Non_reprodctive	NR	NR	265	2.39629	2.66738
Hp35	APR	Reproductive	late oocytes	FEM	255	2.0218	2.14393
Hp36	APR	Reproductive	late oocytes	FEM	290	2.98024	4.44879
Hp37	APR	Reproductive	sperm	MALE	407	2.90115	3.64729
Hp38	APR	Reproductive	late oocytes	FEM	389	3.2463	4.50662
Hp39	APR	Reproductive	late oocytes	FEM	345	3.08086	4.21581
Hp40	APR	Reproductive	sperm	MALE	336	2.77079	3.5953
Hp41	APR	Reproductive	sperm	MALE	198	1.68204	1.88546
Hp42	APR	Reproductive	sperm	MALE	223	1.70924	1.81061
Hp43	APR	Reproductive	late oocytes	FEM	343	3.28867	5.57153
Hp45	MAY	Reproductive	late oocytes	FEM	284	2.12343	2.15338
Hp46	MAY	Reproductive	late oocytes/early embryos/mid embryos	FEM	191	1.65742	1.89818
Hp47	MAY	Reproductive	sperm	MALE	195	1.42899	1.61177
Hp48	MAY	Reproductive	late oocytes	FEM	279	2.76155	3.20453
Hp49	MAY	Reproductive	late oocytes	FEM	326	2.41926	2.42529
Hp50	MAY	Reproductive	sperm	MALE	161	1.28971	1.58155
Hp51	MAY	Reproductive	late oocytes	FEM	301	2.35923	2.60076
Hp52	MAY	Reproductive	late oocytes/early embryos/mid embryos	FEM	211	1.68256	1.87321
Hp53	MAY	Reproductive	late oocytes/early embryos/mid embryos	FEM	223	1.86982	2.04405
Hp54	MAY	Reproductive	early embryos	FEM	325	3.01205	3.45627
Hp55	MAY	Reproductive	sperm	MALE	196	1.475	1.62079
Hp56	MAY	Reproductive	sperm	MALE	136	1.13008	1.46929
Hp57	MAY	Reproductive	early embryos	FEM	321	4.5719	39.3657
Hp58	MAY	Reproductive	early embryos	FEM	291	2.35612	2.75537
Hp59	MAY	Reproductive	late oocytes	FEM	160	1.2717	1.54476
Hp60	MAY	Non_reprodctive	NR	NR	264	2.16084	2.74008
Hp61	JUN	Non_reprodctive	NR	NR	105	0.858097	1.41846
Hp64	JUN	Non_reprodctive	NR	NR	156	3.91686	26.063
Hp65	JUN	Reproductive	late embryos/larvae	FEM	225	1.71687	1.81667
Hp66	JUN	Non_reprodctive	NR	NR	152	1.89185	2.72536
Hp67	JUN	Reproductive	late embryos/larvae	FEM	102	1.56062	2.07088
Hp68	JUN	Reproductive	late embryos/larvae	FEM	55	0.607352	1.22739
Hp69	JUN	Non_reprodctive	NR	NR	58	0.765654	1.34696
Hp70	JUN	Non_reprodctive	NR	NR	80	1.11595	1.69487
Hp71	JUN	Reproductive	late embryos/larvae	FEM	66	0.856823	1.49387
Hp72	JUN	Reproductive	late embryos/larvae	FEM	107	0.888771	1.36191
Hp73	JUN	Non_reprodctive	NR	NR	130	1.81323	2.95244
Hp74	JUN	Reproductive	late embryos/larvae	FEM	96	1.14029	1.61621
Hp75	JUN	Non_reprodctive	NR	NR	85	1.1976	1.77329
Hp76	JUL	Non_reprodctive	NR	NR	119	2.06238	4.11121
Hp77	JUL	Non_reprodctive	NR	NR	95	1.65718	2.7675
Hp78	JUL	Non_reprodctive	NR	NR	118	1.86974	3.26262
Hp79	JUL	Non_reprodctive	NR	NR	54	1.17988	1.88673
Hp80	JUL	Non_reprodctive	NR	NR	97	1.61985	2.67558
Hp81	JUL	Non_reprodctive	NR	NR	80	1.07667	1.56002
Hp82	JUL	Non_reprodctive	NR	NR	180	1.60708	2.03445
Hp83	JUL	Non_reprodctive	NR	NR	243	2.02212	2.97684
Hp84	JUL	Non_reprodctive	NR	NR	114	1.57656	2.41822
Hp85	JUL	Non_reprodctive	NR	NR	104	1.77322	3.01174
Hp86	JUL	Non_reprodctive	NR	NR	129	1.7629	2.45954
Hp87	JUL	Non_reprodctive	NR	NR	112	1.84828	2.96384
Hp88	JUL	Non_reprodctive	NR	NR	85	1.3891	1.97064
Hp89	JUL	Non_reprodctive	NR	NR	219	2.07805	2.48117

## Sheet: S3E_DA
Table S3E. Number of Differentially Abundant (DA) ZOTUs between reproductive and non-reproductive individuals for each month.
Month	Comparison	n. DA ZOTUs	Mean Relab
All	Repro	33	0.0145
	NR	10
March	sperm	2	0.0018
	NR	0
March	sperm	5	0.002
	mid oocytes	1
April	late oocytes	1	0.0047
	sperm	11
May	late oocytes	0	0.0016
	sperm	1
May	Mid embryos	1	0.0008
	sperm	0
