# Supplementary material for: Phagocytosis of microbial symbionts supports embryonic nutrition in the sponge Halichondria panicea
Source: Research Square preprint supplement (doi:10.21203/rs.3.rs-7749905/v1), 2025-12-02
Supplement: Supplementary file 7 [file b3379beda8aaf20bb8b121f7.xlsx]

## Sheet: DE_March_RvsNR_Metazoa
						Non-reproductive		Females Early oocytes
Transcript_ID	logFC	logCPM	LR	PValue	FDR	Hp_16	Hp_17	Hp_20	Hp_26	Hp_27	Hp_30	Condition	BLAST_ID	BLAST_description
TRINITY_DN3073_c0_g1_i7	-10.0097	6.04143	33.6642	6.54952e-09	0.000166247	0.321	0.404	0	0	0	0	Up in Non-reproductive	TITIN	HUMANTitin OS=Homo sapiens OX=9606 GN=TTN PE=1 SV=4
TRINITY_DN5879_c0_g1_i11	-9.82374	5.86382	29.8468	4.67564e-08	0.000458867	5.465	1.443	0	0	0	0	Up in Non-reproductive	GATA1	CHICKErythroid transcription factor OS=Gallus gallus OX=9031 GN=GATA1 PE=1 SV=1
TRINITY_DN2943_c0_g1_i14	-9.71928	5.76452	28.4883	9.42641e-08	0.000598177	0.508	0.135	0	0	0	0	Up in Non-reproductive	SMUF2	MOUSEE3 ubiquitin-protein ligase SMURF2 OS=Mus musculus OX=10090 GN=Smurf2 PE=1 SV=1
TRINITY_DN1844_c0_g1_i2	-9.62492	5.67497	27.6639	1.44331e-07	0.000610594	0.481	1.553	0	0	0	0	Up in Non-reproductive	TDRD9	DANREATP-dependent RNA helicase TDRD9 OS=Danio rerio OX=7955 GN=tdrd9 PE=2 SV=1
TRINITY_DN172_c0_g1_i9	-9.53219	5.58741	26.5838	2.52352e-07	0.000711718	0.446	1.627	0	0	0	0	Up in Non-reproductive	PARP1	CHICKPoly
TRINITY_DN1653_c0_g1_i105	-9.47619	5.53485	26.8299	2.22173e-07	0.000704926	1.23	0.538	0	0	0	0	Up in Non-reproductive	YNS9	SCHPOUncharacterized protein C18H10.09 OS=Schizosaccharomyces pombe (strain 972 / ATCC 24843) OX=284812 GN=SPBC18H10.09 PE=4 SV=2
TRINITY_DN507_c0_g1_i2	-9.45619	5.51598	27.1608	1.87216e-07	0.000678872	0.891	1.003	0	0	0	0	Up in Non-reproductive	FHOD3	MOUSEFH1/FH2 domain-containing protein 3 OS=Mus musculus OX=10090 GN=Fhod3 PE=1 SV=1
TRINITY_DN1418_c0_g1_i22	-9.32547	5.3934	23.5367	1.22552e-06	0.00239288	0.187	1.455	0	0	0	0	Up in Non-reproductive	GRP75	CHICKStress-70 protein, mitochondrial OS=Gallus gallus OX=9031 GN=HSPA9 PE=1 SV=1
TRINITY_DN643_c0_g1_i60	-9.12232	5.20468	23.7098	1.1201e-06	0.00236929	0.571	0.942	0	0	0	0	Up in Non-reproductive	DHX37	HUMANProbable ATP-dependent RNA helicase DHX37 OS=Homo sapiens OX=9606 GN=DHX37 PE=1 SV=1
TRINITY_DN3245_c0_g1_i17	-8.97594	5.07003	22.0315	2.68214e-06	0.00453871	1.409	0.465	0	0	0	0	Up in Non-reproductive	ZIF1	ARATHProtein ZINC INDUCED FACILITATOR 1 OS=Arabidopsis thaliana OX=3702 GN=ZIF1 PE=1 SV=2
TRINITY_DN6851_c0_g1_i65	-8.67536	4.79665	20.2723	6.71671e-06	0.00920998	0.223	0.501	0	0	0	0	Up in Non-reproductive	EIF2A	CHICKEukaryotic translation initiation factor 2A OS=Gallus gallus OX=9031 GN=EIF2A PE=2 SV=1
TRINITY_DN11273_c0_g1_i89	-8.63289	4.75856	20.2224	6.89397e-06	0.00920998	0.392	0.526	0	0	0	0	Up in Non-reproductive	PP4R3	TETNGSerine/threonine-protein phosphatase 4 regulatory subunit 3 OS=Tetraodon nigroviridis OX=99883 GN=smek1 PE=3 SV=1
TRINITY_DN554_c0_g1_i16	-8.58464	4.71537	19.9975	7.75435e-06	0.00984143	1.293	1.578	0	0	0	0	Up in Non-reproductive	EKI1	MOUSEEthanolamine kinase 1 OS=Mus musculus OX=10090 GN=Etnk1 PE=1 SV=2
TRINITY_DN131_c1_g1_i45	-8.53866	4.67419	19.0418	1.27885e-05	0.014755	0.187	0.66	0	0	0	0	Up in Non-reproductive	WDR26	DANREWD repeat-containing protein 26 OS=Danio rerio OX=7955 GN=wdr26 PE=1 SV=1
TRINITY_DN3287_c0_g1_i34	-8.50351	4.643	19.3563	1.08461e-05	0.0131098	0.927	1.7	0	0	0	0	Up in Non-reproductive	RL40	DROMEUbiquitin-60S ribosomal protein L40 OS=Drosophila melanogaster OX=7227 GN=RpL40 PE=1 SV=2
TRINITY_DN3430_c0_g1_i25	-8.33834	4.49733	18.6731	1.55158e-05	0.0171234	0.793	0.758	0	0	0	0	Up in Non-reproductive	HM13	MOUSEMinor histocompatibility antigen H13 OS=Mus musculus OX=10090 GN=Hm13 PE=1 SV=1
TRINITY_DN486_c2_g1_i44	-8.3055	4.46866	18.4353	1.75771e-05	0.0185899	0.998	0.636	0	0	0	0	Up in Non-reproductive	PK3CD	HUMANPhosphatidylinositol 4,5-bisphosphate 3-kinase catalytic subunit delta isoform OS=Homo sapiens OX=9606 GN=PIK3CD PE=1 SV=2
TRINITY_DN525_c0_g1_i78	-8.22503	4.39857	18.0035	2.20501e-05	0.0210337	0.339	0.245	0	0	0	0	Up in Non-reproductive	DMBT1	HUMANDeleted in malignant brain tumors 1 protein OS=Homo sapiens OX=9606 GN=DMBT1 PE=1 SV=2
TRINITY_DN2410_c0_g1_i292	-8.17606	5.16205	20.9463	4.72332e-06	0.00705247	0.205	0.379	0	0	0	0	Up in Non-reproductive	PCAT2	DANRELysophosphatidylcholine acyltransferase 2 OS=Danio rerio OX=7955 GN=lpcat2 PE=2 SV=1
TRINITY_DN3878_c0_g1_i59	-8.17523	4.35558	17.5374	2.81706e-05	0.0246571	0.651	0.232	0	0	0	0	Up in Non-reproductive	DGKE	HUMANDiacylglycerol kinase epsilon OS=Homo sapiens OX=9606 GN=DGKE PE=1 SV=1
TRINITY_DN3448_c0_g1_i12	-8.09967	4.29031	17.435	2.97294e-05	0.025154	0.624	1.076	0	0	0	0	Up in Non-reproductive	LANC1	RATGlutathione S-transferase LANCL1 OS=Rattus norvegicus OX=10116 GN=Lancl1 PE=1 SV=2
TRINITY_DN1235_c0_g1_i26	-8.04885	4.2469	17.3206	3.15748e-05	0.0258536	0.499	0.697	0	0	0	0	Up in Non-reproductive	RSH6A	HUMANRadial spoke head protein 6 homolog A OS=Homo sapiens OX=9606 GN=RSPH6A PE=2 SV=1
TRINITY_DN3949_c0_g1_i8	-8.00237	4.20741	17.0943	3.55693e-05	0.0273593	0.82	0.893	0	0	0	0	Up in Non-reproductive	GARS	PONABGlycine--tRNA ligase OS=Pongo abelii OX=9601 GN=GARS1 PE=2 SV=1
TRINITY_DN23730_c0_g1_i3	-7.99845	4.20413	17.0977	3.55051e-05	0.0273593	0.686	0.575	0	0	0	0	Up in Non-reproductive	EFMT1	CHICKEEF1A lysine methyltransferase 1 OS=Gallus gallus OX=9031 GN=EEF1AKMT1 PE=2 SV=1
TRINITY_DN24243_c0_g1_i10	-7.90781	4.12728	15.3837	8.77413e-05	0.0436694	0.294	1.944	0	0	0	0	Up in Non-reproductive	ZNT2	MOUSEZinc transporter 2 OS=Mus musculus OX=10090 GN=Slc30a2 PE=1 SV=1
TRINITY_DN3412_c0_g1_i24	-7.87755	4.10257	15.0192	0.000106424	0.0473924	1.212	0.135	0	0	0	0	Up in Non-reproductive	UBC	GORGOPolyubiquitin-C OS=Gorilla gorilla gorilla OX=9595 GN=UBC PE=3 SV=1
TRINITY_DN1653_c0_g1_i146	-7.86535	4.09213	16.2407	5.57823e-05	0.0345347	1.997	1.113	0	0	0	0	Up in Non-reproductive	THSD4	HUMANThrombospondin type-1 domain-containing protein 4 OS=Homo sapiens OX=9606 GN=THSD4 PE=2 SV=2
TRINITY_DN8647_c0_g1_i31	-7.85437	4.08294	16.249	5.55392e-05	0.0345347	0.383	0.245	0	0	0	0	Up in Non-reproductive	ERCC2	CRIGRGeneral transcription and DNA repair factor IIH helicase subunit XPD OS=Cricetulus griseus OX=10029 GN=ERCC2 PE=1 SV=1
TRINITY_DN1540_c0_g1_i37	-7.79539	4.03392	15.8354	6.90994e-05	0.0417607	0.312	0.159	0	0	0	0	Up in Non-reproductive	MCAT	RATMitochondrial carnitine/acylcarnitine carrier protein OS=Rattus norvegicus OX=10116 GN=Slc25a20 PE=1 SV=1
TRINITY_DN6695_c0_g1_i12	-7.79357	4.0325	15.5298	8.1216e-05	0.0436694	0.695	0.232	0	0	0	0	Up in Non-reproductive	NDUA6	BOVINNADH dehydrogenase
TRINITY_DN11566_c0_g1_i18	-7.69921	3.95455	15.5053	8.22746e-05	0.0436694	0.437	0.404	0	0	0	0	Up in Non-reproductive	U183	DROMEUPF0183 protein CG7083 OS=Drosophila melanogaster OX=7227 GN=CG7083 PE=2 SV=1
TRINITY_DN409_c0_g1_i59	-7.69462	3.95084	15.4697	8.38399e-05	0.0436694	0.303	0.232	0	0	0	0	Up in Non-reproductive	MYO7A	AEDAEMyosin-VIIa OS=Aedes aegypti OX=7159 GN=ck PE=3 SV=1
TRINITY_DN1474_c0_g1_i49	-7.68337	3.94163	15.3838	8.77368e-05	0.0436694	0.464	0.355	0	0	0	0	Up in Non-reproductive	RFC1	MOUSEReplication factor C subunit 1 OS=Mus musculus OX=10090 GN=Rfc1 PE=1 SV=2
TRINITY_DN19710_c0_g1_i6	-7.65057	3.91463	14.9816	0.000108567	0.047513	0.544	1.333	0	0	0	0	Up in Non-reproductive	NPRL2	BOVINGATOR complex protein NPRL2 OS=Bos taurus OX=9913 GN=NPRL2 PE=2 SV=1
TRINITY_DN11018_c0_g1_i21	-7.65017	3.9144	15.2129	9.60452e-05	0.046883	0.357	0.538	0	0	0	0	Up in Non-reproductive	PSMD3	BOVIN26S proteasome non-ATPase regulatory subunit 3 OS=Bos taurus OX=9913 GN=PSMD3 PE=2 SV=1
TRINITY_DN552_c1_g1_i4	-7.60864	3.8806	14.8845	0.000114298	0.0483537	0.107	0.245	0	0	0	0	Up in Non-reproductive	DYH10	HUMANDynein heavy chain 10, axonemal OS=Homo sapiens OX=9606 GN=DNAH10 PE=1 SV=4
TRINITY_DN3617_c0_g1_i14	-7.59584	3.87035	15.0386	0.000105336	0.0473924	0.125	0.183	0	0	0	0	Up in Non-reproductive	SPRY3	HUMANSPRY domain-containing protein 3 OS=Homo sapiens OX=9606 GN=SPRYD3 PE=1 SV=2
TRINITY_DN6196_c0_g1_i14	-7.53102	3.81818	14.7832	0.000120606	0.0488924	0.187	0.281	0	0	0	0	Up in Non-reproductive	RABX5	MOUSERab5 GDP/GTP exchange factor OS=Mus musculus OX=10090 GN=Rabgef1 PE=1 SV=1
TRINITY_DN4787_c0_g1_i21	-7.52247	3.81144	14.8322	0.00011751	0.0488924	0.25	0.245	0	0	0	0	Up in Non-reproductive	Y1571	ARATHProbable leucine-rich repeat receptor-like protein kinase At1g35710 OS=Arabidopsis thaliana OX=3702 GN=At1g35710 PE=1 SV=1
TRINITY_DN1462_c0_g2_i2	-7.50036	3.79379	14.7716	0.00012135	0.0488924	1.168	1.113	0	0	0	0	Up in Non-reproductive	TPP1	DANRETripeptidyl-peptidase 1 OS=Danio rerio OX=7955 GN=tpp1 PE=1 SV=2
TRINITY_DN7420_c0_g1_i235	7.1881	6.29461	15.0813	0.000102978	0.0473924	0.018	0	1.354	2.158	1.018	0.699	Up in Females	GLSK	MOUSEGlutaminase kidney isoform, mitochondrial OS=Mus musculus OX=10090 GN=Gls PE=1 SV=1
TRINITY_DN929_c0_g1_i5	7.80708	6.29377	16.7819	4.19323e-05	0.0300636	0	0	0.372	0.599	0.535	0.707	Up in Females	TM9S1	BOVINTransmembrane 9 superfamily member 1 OS=Bos taurus OX=9913 GN=TM9SF1 PE=2 SV=1
TRINITY_DN226_c0_g1_i41	8.29091	7.16929	23.0593	1.57077e-06	0.00284792	0.009	0	1.797	1.679	1.439	2.466	Up in Females	JAK1	HUMANTyrosine-protein kinase JAK1 OS=Homo sapiens OX=9606 GN=JAK1 PE=1 SV=2
TRINITY_DN3544_c0_g1_i2	8.75762	5.80355	15.4441	8.49828e-05	0.0436694	0	0	0.558	0.332	0.226	0.436	Up in Females	RPB1	CRIGRDNA-directed RNA polymerase II subunit RPB1 OS=Cricetulus griseus OX=10029 GN=POLR2A PE=2 SV=2
TRINITY_DN2600_c0_g1_i2	8.76326	5.80909	14.9182	0.000112275	0.0483029	0	0	0.177	0.48	0.504	0.197	Up in Females	LRK1	CAEELLeucine-rich repeat serine/threonine-protein kinase 1 OS=Caenorhabditis elegans OX=6239 GN=lrk-1 PE=1 SV=6
TRINITY_DN6_c1_g1_i1	8.79795	5.84181	15.6159	7.76003e-05	0.0436694	0	0	0.372	0.655	0.329	0.279	Up in Females	NOM1	HUMANNucleolar MIF4G domain-containing protein 1 OS=Homo sapiens OX=9606 GN=NOM1 PE=1 SV=1
TRINITY_DN1526_c0_g1_i15	8.80141	5.84509	15.0815	0.000102967	0.0473924	0	0	0.407	0.443	0.236	0.115	Up in Females	ZZEF1	HUMANZinc finger ZZ-type and EF-hand domain-containing protein 1 OS=Homo sapiens OX=9606 GN=ZZEF1 PE=1 SV=6
TRINITY_DN508_c1_g1_i13	8.89128	5.93075	16.5828	4.65707e-05	0.031108	0	0	1.204	0.941	1.059	0.74	Up in Females	PLPL9	MOUSE85/88 kDa calcium-independent phospholipase A2 OS=Mus musculus OX=10090 GN=Pla2g6 PE=1 SV=3
TRINITY_DN603_c0_g1_i90	8.98196	6.01717	16.7502	4.26383e-05	0.0300636	0	0	0.699	0.332	0.298	0.345	Up in Females	RNF41	XENLAE3 ubiquitin-protein ligase NRDP1 OS=Xenopus laevis OX=8355 GN=rnf41 PE=2 SV=1
TRINITY_DN1924_c0_g1_i1	8.98886	6.02414	16.6875	4.40693e-05	0.0302327	0	0	0.115	0.175	0.329	0.247	Up in Females	PDX1	SUBDOPyridoxal 5'-phosphate synthase subunit SNZERR OS=Suberites domuncula OX=55567 GN=SNZERR PE=2 SV=2
TRINITY_DN585_c0_g1_i28	9.04512	6.07747	16.4053	5.11428e-05	0.0332861	0	0	2	1.688	0.463	0.822	Up in Females	HT1	ARATHSerine/threonine/tyrosine-protein kinase HT1 OS=Arabidopsis thaliana OX=3702 GN=HT1 PE=1 SV=1
TRINITY_DN2175_c0_g1_i13	9.16263	6.19027	15.5378	8.08719e-05	0.0436694	0	0	0.779	0.609	0.093	0.156	Up in Females	DMXL1	HUMANDmX-like protein 1 OS=Homo sapiens OX=9606 GN=DMXL1 PE=1 SV=3
TRINITY_DN6548_c0_g1_i31	9.16727	6.1948	17.9758	2.23736e-05	0.0210337	0	0	0.549	0.71	0.36	0.962	Up in Females	GGH	BOVINGamma-glutamyl hydrolase OS=Bos taurus OX=9913 GN=GGH PE=2 SV=1
TRINITY_DN66_c0_g1_i76	9.19643	6.22303	17.7389	2.53394e-05	0.0229711	0	0	0.319	0.895	0.894	1.101	Up in Females	MDR1	CRIGRATP-dependent translocase ABCB1 OS=Cricetulus griseus OX=10029 GN=ABCB1 PE=1 SV=2
TRINITY_DN765_c0_g1_i116	9.34924	6.37023	16.7552	4.25255e-05	0.0300636	0	0	0.549	0.065	0.504	0.658	Up in Females	STX5	BOVINSyntaxin-5 OS=Bos taurus OX=9913 GN=STX5 PE=2 SV=1
TRINITY_DN488_c0_g1_i3	9.58764	6.60092	21.3861	3.75479e-06	0.00595675	0	0	2.124	1.356	1.645	2.162	Up in Females	UBE2S	NEMVEUbiquitin-conjugating enzyme E2 S OS=Nematostella vectensis OX=45351 GN=v1g237158 PE=3 SV=1
TRINITY_DN670_c5_g1_i4	9.97416	6.97721	23.9171	1.00577e-06	0.00232085	0	0	1.77	1.217	1.028	0.781	Up in Females	SSPO	MOUSESCO-spondin OS=Mus musculus OX=10090 GN=Sspo PE=2 SV=2
TRINITY_DN1135_c0_g1_i2	10.4666	7.46027	15.6072	7.79576e-05	0.0436694	0	0	1.744	2.887	0	3.173	Up in Females	SCRIB	DANREProtein scribble homolog OS=Danio rerio OX=7955 GN=scrib PE=1 SV=1
TRINITY_DN7598_c0_g1_i5	10.5841	7.5759	27.883	1.28874e-07	0.000610594	0	0	2.735	1.19	2.334	1.052	Up in Females	MYO3B	MOUSEMyosin-IIIb OS=Mus musculus OX=10090 GN=Myo3b PE=1 SV=2
TRINITY_DN139_c0_g1_i16	10.5948	7.58671	25.5437	4.32474e-07	0.00109775	0	0	4.364	5.377	21.505	8.934	Up in Females	TSN7	MOUSETetraspanin-7 OS=Mus musculus OX=10090 GN=Tspan7 PE=1 SV=2
TRINITY_DN217_c2_g1_i14	10.6062	7.59777	29.5593	5.42332e-08	0.000458867	0	0	1.089	1.254	1.449	2.014	Up in Females	HECD1	HUMANE3 ubiquitin-protein ligase HECTD1 OS=Homo sapiens OX=9606 GN=HECTD1 PE=1 SV=3
TRINITY_DN7_c0_g1_i16	10.7635	7.7529	15.0479	0.000104819	0.0473924	0	0	9.055	7.738	0	1.044	Up in Females	TAPT1	CHICKTransmembrane anterior posterior transformation protein 1 homolog OS=Gallus gallus OX=9031 GN=TAPT1 PE=2 SV=2
TRINITY_DN965_c0_g1_i5	12.2075	9.18454	18.0719	2.12715e-05	0.0210337	0	0	0.159	0.581	0	1.882	Up in Females	FGFR3	DANREFibroblast growth factor receptor 3 OS=Danio rerio OX=7955 GN=fgfr3 PE=2 SV=1

## Sheet: DE_Apr_RvsNR_Metazoa
						Females with mid oocytes				Males with sperm
Transcript_ID	logFC	logCPM	LR	PValue	FDR	Hp_31	Hp_33	Hp_35	Hp_43	Hp_37	Hp_40	Hp_41	Hp_42	Condition	BLAST_ID	BLAST_description
TRINITY_DN2722_c0_g1_i14	-12.6164	9.04834	23.887	1.02159e-06	0.000541952	0	0	2.536	2.763	0	0	0	0	Up in Female	FAT4	HUMANProtocadherin Fat 4 OS=Homo sapiens OX=9606 GN=FAT4 PE=1 SV=2
TRINITY_DN1342_c1_g1_i11	-12.5672	8.99927	35.499	2.55184e-09	4.06125e-06	0	4.806	3.114	3.5	0	0	0	0	Up in Female	DYHC1	MOUSECytoplasmic dynein 1 heavy chain 1 OS=Mus musculus OX=10090 GN=Dync1h1 PE=1 SV=2
TRINITY_DN798_c0_g1_i36	-10.3728	6.83136	19.0995	1.24079e-05	0.00374157	1.085	0	0	1.289	0	0	0	0	Up in Female	HUWE1	HUMANE3 ubiquitin-protein ligase HUWE1 OS=Homo sapiens OX=9606 GN=HUWE1 PE=1 SV=3
TRINITY_DN4140_c0_g1_i27	-10.1712	6.63377	40.9501	1.56163e-10	3.44122e-07	2.88	0.847	0.63	1.22	0	0	0	0	Up in Female	HMCN2	MOUSEHemicentin-2 OS=Mus musculus OX=10090 GN=Hmcn2 PE=1 SV=1
TRINITY_DN1742_c0_g1_i7	-10.1498	6.61315	18.2474	1.93991e-05	0.0053954	0.683	0	0.828	0	0	0	0	0	Up in Female	FAT4	HUMANProtocadherin Fat 4 OS=Homo sapiens OX=9606 GN=FAT4 PE=1 SV=2
TRINITY_DN426_c0_g1_i13	-10.0291	6.49592	26.2493	3.00069e-07	0.000199909	1.138	0	1.044	0.99	0	0	0	0	Up in Female	NAGAB	CHICKAlpha-N-acetylgalactosaminidase OS=Gallus gallus OX=9031 GN=NAGA PE=1 SV=1
TRINITY_DN1266_c0_g1_i26	-9.99651	6.46379	33.2202	8.22907e-09	9.42952e-06	0.394	3.146	1.398	0.169	0	0	0	0	Up in Female	ZNFX1	MOUSENFX1-type zinc finger-containing protein 1 OS=Mus musculus OX=10090 GN=Znfx1 PE=1 SV=3
TRINITY_DN356_c0_g1_i38	-9.73967	6.21506	16.5568	4.72145e-05	0.0102466	0	0	19.842	3.799	0	0	0	0	Up in Female	H10	XENTRHistone H1.0 OS=Xenopus tropicalis OX=8364 GN=h1-0 PE=2 SV=1
TRINITY_DN1150_c0_g1_i3	-9.63379	7.45652	52.6413	4.00371e-13	2.86736e-09	0.875	0.614	0.535	0.775	0	0	0	0	Up in Female	VP13D	HUMANVacuolar protein sorting-associated protein 13D OS=Homo sapiens OX=9606 GN=VPS13D PE=1 SV=2
TRINITY_DN3073_c0_g1_i7	-9.43099	5.91987	16.0556	6.15093e-05	0.0124297	0.473	0	0	0.322	0	0	0	0	Up in Female	TITIN	HUMANTitin OS=Homo sapiens OX=9606 GN=TTN PE=1 SV=4
TRINITY_DN1472_c0_g1_i3	-9.37555	5.86684	13.6826	0.000216446	0.0262734	25.789	0.337	0	0	0	0	0	0	Up in Female	JAL9	ARATHJacalin-related lectin 9 OS=Arabidopsis thaliana OX=3702 GN=JAL9 PE=3 SV=1
TRINITY_DN2703_c0_g1_i15	-9.34626	5.83809	15.4717	8.37495e-05	0.0148097	1.234	0	0.621	0	0	0	0	0	Up in Female	LPLT2	CAEELLatrophilin-like protein LAT-2 OS=Caenorhabditis elegans OX=6239 GN=lat-2 PE=2 SV=1
TRINITY_DN1400_c0_g1_i15	-9.29738	5.79121	15.2037	9.65117e-05	0.016309	0	6.094	0	11.336	0	0	0	0	Up in Female	SVEP1	MOUSESushi, von Willebrand factor type A, EGF and pentraxin domain-containing protein 1 OS=Mus musculus OX=10090 GN=Svep1 PE=1 SV=1
TRINITY_DN2410_c0_g1_i277	-9.13716	5.63827	14.608	0.000132355	0.0197477	0	0	0.802	0.238	0	0	0	0	Up in Female	PCAT2	DANRELysophosphatidylcholine acyltransferase 2 OS=Danio rerio OX=7955 GN=lpcat2 PE=2 SV=1
TRINITY_DN2479_c0_g1_i41	-8.9511	5.46372	18.7271	1.50827e-05	0.00445438	0.394	0	0.405	1.412	0	0	0	0	Up in Female	MSMO1	CHICKMethylsterol monooxygenase 1 OS=Gallus gallus OX=9031 GN=MSMO1 PE=2 SV=1
TRINITY_DN9612_c0_g1_i13	-8.88034	5.39547	13.7692	0.000206701	0.0257833	1.549	1.383	0	0	0	0	0	0	Up in Female	NOTC1	CRIGRNeurogenic locus notch homolog protein 1 OS=Cricetulus griseus OX=10029 GN=NOTCH1 PE=1 SV=2
TRINITY_DN2391_c0_g1_i10	-8.8716	5.43655	13.8736	0.000195526	0.0251176	0	0	0.673	0.591	0	0	0	0	Up in Female	PI3R4	MOUSEPhosphoinositide 3-kinase regulatory subunit 4 OS=Mus musculus OX=10090 GN=Pik3r4 PE=1 SV=3
TRINITY_DN2600_c0_g1_i4	-8.83783	5.35573	18.6357	1.58232e-05	0.00456814	0	0.484	0.552	0.468	0	0	0	0	Up in Female	LRK1	CAEELLeucine-rich repeat serine/threonine-protein kinase 1 OS=Caenorhabditis elegans OX=6239 GN=lrk-1 PE=1 SV=6
TRINITY_DN7028_c0_g1_i6	-8.72283	6.21689	17.8151	2.43438e-05	0.00639795	84.3	27.495	0	1.312	0.167	0	0	0	Up in Female	EDSP	CYNPYEpidermal differentiation-specific protein OS=Cynops pyrrhogaster OX=8330 PE=2 SV=1
TRINITY_DN73_c0_g1_i2	-8.66653	5.19501	13.0665	0.000300624	0.0318036	1.199	1.582	0	0	0	0	0	0	Up in Female	OAS1B	RATInactive 2'-5'-oligoadenylate synthase 1B OS=Rattus norvegicus OX=10116 GN=Oas1b PE=2 SV=1
TRINITY_DN1000_c0_g1_i41	-8.57408	5.11248	12.5897	0.000387875	0.0371435	0	0	0.181	0.637	0	0	0	0	Up in Female	MYRF	MOUSEMyelin regulatory factor OS=Mus musculus OX=10090 GN=Myrf PE=1 SV=2
TRINITY_DN92_c0_g1_i27	-8.51211	5.05597	12.6025	0.00038523	0.0370325	0.289	0	0	0.798	0	0	0	0	Up in Female	VP13C	HUMANVacuolar protein sorting-associated protein 13C OS=Homo sapiens OX=9606 GN=VPS13C PE=1 SV=1
TRINITY_DN2599_c0_g1_i10	-8.43808	4.98445	12.3733	0.000435518	0.0396073	0.954	0.778	0	0	0	0	0	0	Up in Female	PSMD2	BOVIN26S proteasome non-ATPase regulatory subunit 2 OS=Bos taurus OX=9913 GN=PSMD2 PE=1 SV=2
TRINITY_DN1844_c0_g1_i2	-8.35366	4.9073	15.9246	6.5916e-05	0.0128652	0	0.225	0.794	0.391	0	0	0	0	Up in Female	TDRD9	DANREATP-dependent RNA helicase TDRD9 OS=Danio rerio OX=7955 GN=tdrd9 PE=2 SV=1
TRINITY_DN1696_c0_g1_i11	-8.35274	4.90765	12.2731	0.000459546	0.0406316	0	0	1.13	0.936	0	0	0	0	Up in Female	MCF2L	RATGuanine nucleotide exchange factor DBS OS=Rattus norvegicus OX=10116 GN=Mcf2l PE=1 SV=3
TRINITY_DN337_c0_g1_i32	-8.3383	4.89321	20.6436	5.53207e-06	0.00208522	0.77	0.985	4.167	0.614	0	0	0	0	Up in Female	NOGG3	DANRENoggin-3 OS=Danio rerio OX=7955 GN=nog3 PE=1 SV=1
TRINITY_DN2660_c0_g1_i19	-8.28747	4.84715	12.0112	0.000528807	0.0435308	0	0.363	0	0.422	0	0	0	0	Up in Female	SVEP1	RATSushi, von Willebrand factor type A, EGF and pentraxin domain-containing protein 1 OS=Rattus norvegicus OX=10116 GN=Svep1 PE=1 SV=1
TRINITY_DN3417_c0_g1_i10	-8.21906	4.7859	11.6337	0.000647683	0.0493462	0.867	0.311	0	0	0	0	0	0	Up in Female	TBCD4	HUMANTBC1 domain family member 4 OS=Homo sapiens OX=9606 GN=TBC1D4 PE=1 SV=2
TRINITY_DN461_c0_g1_i4	-8.20877	4.7754	11.7521	0.000607733	0.0473091	0	0.804	0	0.821	0	0	0	0	Up in Female	UB2V1	BOVINUbiquitin-conjugating enzyme E2 variant 1 OS=Bos taurus OX=9913 GN=UBE2V1 PE=2 SV=1
TRINITY_DN6325_c0_g1_i4	-8.20802	7.01642	17.7736	2.48817e-05	0.00647988	303.394	39.207	0	4.797	0	0.751	0	0.414	Up in Female	EDSP	CYNPYEpidermal differentiation-specific protein OS=Cynops pyrrhogaster OX=8330 PE=2 SV=1
TRINITY_DN6548_c0_g1_i84	-8.11548	4.69338	14.7883	0.000120277	0.0183557	0.718	0.138	0	0.461	0	0	0	0	Up in Female	TBCEL	HUMANTubulin-specific chaperone cofactor E-like protein OS=Homo sapiens OX=9606 GN=TBCEL PE=1 SV=2
TRINITY_DN1084_c0_g1_i2	-8.08319	4.66194	15.1885	9.72938e-05	0.016309	1.112	2.066	0	1.044	0	0	0	0	Up in Female	RBL2A	MOUSERab-like protein 2A OS=Mus musculus OX=10090 GN=Rabl2 PE=1 SV=1
TRINITY_DN1881_c0_g1_i12	-8.06597	4.64822	15.0572	0.000104304	0.0170743	0.534	0	1.277	1.474	0	0	0	0	Up in Female	RTK2	GEOCYClass II receptor tyrosine kinase OS=Geodia cydonium OX=6047 GN=TK PE=2 SV=2
TRINITY_DN9612_c0_g1_i1	-8.01466	4.60158	12.4562	0.000416601	0.0386977	1.199	0.501	0.009	0	0	0	0	0	Up in Female	NOTC1	CRIGRNeurogenic locus notch homolog protein 1 OS=Cricetulus griseus OX=10029 GN=NOTCH1 PE=1 SV=2
TRINITY_DN3103_c0_g1_i30	-7.93854	4.533	13.9049	0.000192292	0.0249092	0.315	0	1.035	0.1	0	0	0	0	Up in Female	NVL	HUMANNuclear valosin-containing protein-like OS=Homo sapiens OX=9606 GN=NVL PE=1 SV=1
TRINITY_DN2884_c0_g1_i6	-7.90583	4.50316	13.1447	0.00028833	0.0315259	0.473	0.484	0	0.015	0	0	0	0	Up in Female	UBP2	HUMANUbiquitin carboxyl-terminal hydrolase 2 OS=Homo sapiens OX=9606 GN=USP2 PE=1 SV=2
TRINITY_DN1414_c0_g1_i75	-7.89521	4.4944	19.8797	8.24722e-06	0.00288119	0.219	0.398	0.147	0.184	0	0	0	0	Up in Female	ODB2	MOUSELipoamide acyltransferase component of branched-chain alpha-keto acid dehydrogenase complex, mitochondrial OS=Mus musculus OX=10090 GN=Dbt PE=1 SV=2
TRINITY_DN2410_c0_g1_i45	-7.88578	4.48834	12.7847	0.000349457	0.035126	0.578	0.086	0	0.023	0	0	0	0	Up in Female	PCAT2	DANRELysophosphatidylcholine acyltransferase 2 OS=Danio rerio OX=7955 GN=lpcat2 PE=2 SV=1
TRINITY_DN1419_c0_g1_i22	-7.86256	4.46583	19.9554	7.92715e-06	0.00283861	0.674	0.484	0.492	0.361	0	0	0	0	Up in Female	Y9801	DROMEPP2C-like domain-containing protein CG9801 OS=Drosophila melanogaster OX=7227 GN=CG9801 PE=2 SV=1
TRINITY_DN4268_c1_g1_i4	-7.82336	5.49536	23.4726	1.26704e-06	0.000620671	0.464	0.787	0.638	0.115	0.009	0	0	0	Up in Female	RBGP1	MOUSERab GTPase-activating protein 1 OS=Mus musculus OX=10090 GN=Rabgap1 PE=1 SV=1
TRINITY_DN129_c0_g1_i12	-7.82136	4.45391	14.2147	0.000163095	0.0224624	0	0.294	0.276	0.338	0	0	0	0	Up in Female	XDH	CHICKXanthine dehydrogenase/oxidase OS=Gallus gallus OX=9031 GN=XDH PE=1 SV=1
TRINITY_DN6798_c0_g1_i24	-7.76199	4.37522	13.7522	0.000208576	0.0258359	0	0.38	0.104	0.146	0	0	0	0	Up in Female	PTPRQ	MOUSEPhosphatidylinositol phosphatase PTPRQ OS=Mus musculus OX=10090 GN=Ptprq PE=1 SV=1
TRINITY_DN1949_c1_g1_i12	-7.74611	4.36329	13.7694	0.000206675	0.0257833	2.547	0.968	2.286	0	0	0	0	0	Up in Female	OXR1	RATOxidation resistance protein 1 OS=Rattus norvegicus OX=10116 GN=Oxr1 PE=1 SV=3
TRINITY_DN2660_c0_g1_i21	-7.72651	4.34592	13.9702	0.000185732	0.0246693	0.114	0.259	0	0.177	0	0	0	0	Up in Female	SVEP1	RATSushi, von Willebrand factor type A, EGF and pentraxin domain-containing protein 1 OS=Rattus norvegicus OX=10116 GN=Svep1 PE=1 SV=1
TRINITY_DN2808_c0_g1_i29	-7.72032	4.34249	13.1669	0.000284937	0.0313255	0	0.164	0.155	0.668	0	0	0	0	Up in Female	PLCG1	RAT1-phosphatidylinositol 4,5-bisphosphate phosphodiesterase gamma-1 OS=Rattus norvegicus OX=10116 GN=Plcg1 PE=1 SV=1
TRINITY_DN354_c0_g1_i3	-7.72018	4.33907	12.1872	0.000481194	0.0418046	3.528	4.564	0.129	0	0	0	0	0	Up in Female	SYPL1	HUMANSynaptophysin-like protein 1 OS=Homo sapiens OX=9606 GN=SYPL1 PE=1 SV=1
TRINITY_DN1179_c0_g1_i52	-7.67324	4.2995	18.6871	1.54019e-05	0.00450224	0.158	0.337	0.397	0.207	0	0	0	0	Up in Female	RUVB2	XENLARuvB-like 2 OS=Xenopus laevis OX=8355 GN=ruvbl2 PE=2 SV=1
TRINITY_DN3560_c0_g1_i23	-7.6404	4.27357	13.2184	0.000277208	0.0307797	0.543	0.095	0	0.184	0	0	0	0	Up in Female	NU188	HUMANNucleoporin NUP188 homolog OS=Homo sapiens OX=9606 GN=NUP188 PE=1 SV=1
TRINITY_DN52_c0_g1_i81	-7.58031	4.21828	13.0837	0.000297878	0.0318036	0	0.294	0.069	0.215	0	0	0	0	Up in Female	TORSO	BOMMOTyrosine-protein kinase receptor torso OS=Bombyx mori OX=7091 GN=tor PE=1 SV=1
TRINITY_DN724_c0_g1_i20	-7.55959	4.19981	11.6536	0.00064078	0.0493087	0.516	0.674	0	0.015	0	0	0	0	Up in Female	RIPR2	BOVINRho family-interacting cell polarization regulator 2 OS=Bos taurus OX=9913 GN=RIPOR2 PE=2 SV=1
TRINITY_DN461_c1_g1_i102	-7.51725	4.16573	13.3164	0.000263095	0.0296511	0.98	0.769	0	0.476	0	0	0	0	Up in Female	TTLL1	BOVINProbable tubulin polyglutamylase TTLL1 OS=Bos taurus OX=9913 GN=TTLL1 PE=2 SV=1
TRINITY_DN2057_c0_g1_i3	-7.50931	4.16059	13.0747	0.000299308	0.0318036	0.446	0	0.155	0.115	0	0	0	0	Up in Female	PI4KA	BOVINPhosphatidylinositol 4-kinase alpha OS=Bos taurus OX=9913 GN=PI4KA PE=2 SV=2
TRINITY_DN1729_c0_g1_i17	-7.49266	4.14321	13.1218	0.000291887	0.0317935	0.446	0.389	0.345	0	0	0	0	0	Up in Female	PP1GA	XENLASerine/threonine-protein phosphatase PP1-gamma catalytic subunit A OS=Xenopus laevis OX=8355 GN=ppp1cc-a PE=1 SV=2
TRINITY_DN799_c1_g2_i1	-7.46461	4.12122	13.0234	0.000307615	0.0322422	0.271	0.156	0	0.115	0	0	0	0	Up in Female	TF3C2	MOUSEGeneral transcription factor 3C polypeptide 2 OS=Mus musculus OX=10090 GN=Gtf3c2 PE=2 SV=2
TRINITY_DN608_c0_g1_i23	-7.44897	4.10666	12.5844	0.000388978	0.0371435	1.532	0.553	1.863	0	0	0	0	0	Up in Female	SVEP1	HUMANSushi, von Willebrand factor type A, EGF and pentraxin domain-containing protein 1 OS=Homo sapiens OX=9606 GN=SVEP1 PE=1 SV=3
TRINITY_DN1327_c0_g1_i2	-7.37515	4.04262	12.6211	0.000381409	0.0370325	0	0.657	0.328	0.361	0	0	0	0	Up in Female	GRHL1	MOUSEGrainyhead-like protein 1 homolog OS=Mus musculus OX=10090 GN=Grhl1 PE=1 SV=1
TRINITY_DN20171_c0_g1_i168	-7.35864	4.03237	12.6602	0.000373518	0.0367703	0.709	0	0.388	0.2	0	0	0	0	Up in Female	VA0D1	DROMEV-type proton ATPase subunit d 1 OS=Drosophila melanogaster OX=7227 GN=VhaAC39-1 PE=2 SV=1
TRINITY_DN2521_c0_g1_i1	-7.35634	4.02784	12.6044	0.000384835	0.0370325	0.28	0.372	0	0.123	0	0	0	0	Up in Female	KLDC2	BOVINKelch domain-containing protein 2 OS=Bos taurus OX=9913 GN=KLHDC2 PE=2 SV=1
TRINITY_DN2185_c0_g1_i3	-7.22187	3.91473	15.3035	9.15463e-05	0.015991	0.061	0.207	0.138	0.031	0	0	0	0	Up in Female	MPRI	BOVINCation-independent mannose-6-phosphate receptor OS=Bos taurus OX=9913 GN=IGF2R PE=1 SV=2
TRINITY_DN3995_c0_g1_i5	-7.18722	3.88969	11.8504	0.000576498	0.0457695	0.324	0	1.07	1.581	0	0	0	0	Up in Female	SNX6	HUMANSorting nexin-6 OS=Homo sapiens OX=9606 GN=SNX6 PE=1 SV=1
TRINITY_DN3594_c0_g1_i16	-7.13239	3.84172	14.9868	0.000108267	0.017327	0.166	0.519	0.069	0.276	0	0	0	0	Up in Female	HIF1A	CHICKHypoxia-inducible factor 1-alpha OS=Gallus gallus OX=9031 GN=HIF1A PE=2 SV=2
TRINITY_DN393_c0_g1_i24	-7.13137	3.8407	11.8716	0.000569972	0.0457367	0.298	0.199	0.311	0	0	0	0	0	Up in Female	NU153	XENLANuclear pore complex protein Nup153 OS=Xenopus laevis OX=8355 GN=nup153 PE=1 SV=1
TRINITY_DN844_c0_g1_i1	-7.06229	3.78697	11.6106	0.000655763	0.0496975	0.403	0.13	0	0.115	0	0	0	0	Up in Female	UB2Q2	RABITUbiquitin-conjugating enzyme E2 Q2 OS=Oryctolagus cuniculus OX=9986 GN=UBE2Q2 PE=2 SV=1
TRINITY_DN108_c7_g1_i10	-7.0598	3.78146	11.7762	0.000599932	0.0469569	0	0.683	0.345	0.445	0	0	0	0	Up in Female	TOC34	CHLRETranslocase of chloroplast 34 homolog, chloroplastic OS=Chlamydomonas reinhardtii OX=3055 GN=TOC34 PE=1 SV=1
TRINITY_DN0_c4_g1_i20	-6.79923	3.57559	14.5804	0.000134304	0.0198321	0.438	0.207	0.216	0.361	0	0	0	0	Up in Female	ROAA	MOUSEHeterogeneous nuclear ribonucleoprotein A/B OS=Mus musculus OX=10090 GN=Hnrnpab PE=1 SV=1
TRINITY_DN1697_c0_g1_i2	-6.79449	3.57152	14.88	0.000114572	0.0180338	3.922	2.766	3.787	3.646	0	0	0	0	Up in Female	NOP10	SCHPOH/ACA ribonucleoprotein complex subunit nop10 OS=Schizosaccharomyces pombe (strain 972 / ATCC 24843) OX=284812 GN=nop10 PE=3 SV=1
TRINITY_DN7353_c0_g1_i6	-6.79055	3.56847	14.7379	0.000123535	0.0186259	0.28	0.147	0.216	0.161	0	0	0	0	Up in Female	SHOC1	HUMANProtein shortage in chiasmata 1 ortholog OS=Homo sapiens OX=9606 GN=SHOC1 PE=1 SV=1
TRINITY_DN21554_c0_g1_i2	-6.64919	3.59634	14.298	0.000156032	0.0220189	0.35	0.614	0.362	0.223	0	0	0	0	Up in Female	TEP1	HUMANTelomerase protein component 1 OS=Homo sapiens OX=9606 GN=TEP1 PE=1 SV=2
TRINITY_DN1643_c0_g1_i59	-6.64735	3.45671	14.059	0.000177161	0.0237498	0.158	0.406	0.181	0.123	0	0	0	0	Up in Female	MOEH	DROPSMoesin/ezrin/radixin homolog 1 OS=Drosophila pseudoobscura pseudoobscura OX=46245 GN=Moe PE=3 SV=3
TRINITY_DN15126_c0_g1_i14	-6.31045	3.20782	12.0632	0.000514267	0.0429461	0.385	0.069	0.138	0.054	0	0	0	0	Up in Female	RHO	APLCARas-like GTP-binding protein RHO OS=Aplysia californica OX=6500 GN=RHO PE=2 SV=1
TRINITY_DN940_c0_g1_i160	-6.29811	3.19842	13.1638	0.000285403	0.0313255	0.193	0.121	0.198	0.299	0	0	0	0	Up in Female	KDM4A	MOUSELysine-specific demethylase 4A OS=Mus musculus OX=10090 GN=Kdm4a PE=1 SV=3
TRINITY_DN155_c0_g1_i23	-6.27163	3.17913	13.0041	0.000310812	0.0323775	0.131	0.216	0.06	0.138	0	0	0	0	Up in Female	UBC9	CHICKSUMO-conjugating enzyme UBC9 OS=Gallus gallus OX=9031 GN=UBE2I PE=1 SV=1
TRINITY_DN98_c0_g1_i40	-6.21496	3.13876	12.9221	0.000324728	0.0335829	0.21	0.467	0.526	0.246	0	0	0	0	Up in Female	SPTCS	MOUSESpatacsin OS=Mus musculus OX=10090 GN=Spg11 PE=1 SV=3
TRINITY_DN1374_c0_g1_i5	-6.06797	3.82459	12.7918	0.00034815	0.035126	0.788	0.311	0.397	0.959	0	0	0	0.021	Up in Female	US6NL	MOUSEUSP6 N-terminal-like protein OS=Mus musculus OX=10090 GN=Usp6nl PE=1 SV=2
TRINITY_DN1731_c2_g1_i5	-6.05941	3.03097	12.1417	0.000493063	0.042038	0.324	0.078	0.173	0.138	0	0	0	0	Up in Female	SPCS2	XENTRProbable signal peptidase complex subunit 2 OS=Xenopus tropicalis OX=8364 GN=spcs2 PE=2 SV=1
TRINITY_DN3045_c0_g1_i16	-6.05598	3.0284	11.9633	0.000542579	0.0445069	2.329	4.296	0.802	3.385	0	0	0	0	Up in Female	SKEL1	DROMEProtein Skeletor, isoforms B/C OS=Drosophila melanogaster OX=7227 GN=Skeletor PE=1 SV=2
TRINITY_DN53_c0_g1_i18	-6.04011	6.02369	12.9144	0.000326072	0.0336007	0.035	0.026	1.976	0.269	0.009	0	0.026	0	Up in Female	USP9X	MOUSEProbable ubiquitin carboxyl-terminal hydrolase FAF-X OS=Mus musculus OX=10090 GN=Usp9x PE=1 SV=2
TRINITY_DN12_c1_g1_i40	-6.01614	3.00132	12.0753	0.000510952	0.0429244	0.07	0.052	0.19	0.077	0	0	0	0	Up in Female	NID1	HUMANNidogen-1 OS=Homo sapiens OX=9606 GN=NID1 PE=1 SV=3
TRINITY_DN354_c0_g2_i1	-5.99603	4.68489	14.0563	0.000177417	0.0237498	1.733	2.282	5.185	1.75	0	0	0	0.127	Up in Female	SYPL1	HUMANSynaptophysin-like protein 1 OS=Homo sapiens OX=9606 GN=SYPL1 PE=1 SV=1
TRINITY_DN1762_c1_g2_i2	-5.96471	2.96669	12.0662	0.000513453	0.0429461	0.578	0.182	0.561	0.33	0	0	0	0	Up in Female	DTX3	HUMANProbable E3 ubiquitin-protein ligase DTX3 OS=Homo sapiens OX=9606 GN=DTX3 PE=1 SV=2
TRINITY_DN5379_c0_g1_i4	-5.95004	2.95673	12.3361	0.000444272	0.0398967	0.131	0.069	0.086	0.107	0	0	0	0	Up in Female	ERG7	RATLanosterol synthase OS=Rattus norvegicus OX=10116 GN=Lss PE=1 SV=2
TRINITY_DN4844_c0_g1_i15	-5.86009	2.89767	11.9229	0.000554483	0.0451258	0.14	0.164	0.233	0.077	0	0	0	0	Up in Female	DFP3	ANTMYPutative defense protein 3 OS=Antheraea mylitta OX=34739 PE=2 SV=1
TRINITY_DN1533_c0_g3_i2	-5.84305	2.88656	12.058	0.000515707	0.0429461	1.226	1.322	0.966	0.637	0	0	0	0	Up in Female	LG3BP	MOUSEGalectin-3-binding protein OS=Mus musculus OX=10090 GN=Lgals3bp PE=1 SV=1
TRINITY_DN2768_c0_g1_i22	-5.8139	5.17364	14.5321	0.00013779	0.0199357	0.551	0.225	0.319	0.215	0	0	0	0.021	Up in Female	TCPQ	HUMANT-complex protein 1 subunit theta OS=Homo sapiens OX=9606 GN=CCT8 PE=1 SV=4
TRINITY_DN12_c0_g2_i72	-5.77632	2.8434	11.814	0.000587874	0.046266	0.175	0.13	0.181	0.092	0	0	0	0	Up in Female	GNAS	GEOCYGuanine nucleotide-binding protein G(s) subunit alpha OS=Geodia cydonium OX=6047 PE=2 SV=1
TRINITY_DN1472_c0_g1_i13	-5.43065	7.86197	13.3858	0.00025353	0.0292858	52.48	10.459	0.613	1.182	0	1.256	0.171	0.18	Up in Female	LECA	CASCRAgglutinin OS=Castanea crenata OX=103480 PE=1 SV=1
TRINITY_DN43_c0_g1_i18	-5.0492	5.86159	12.6333	0.000378945	0.0370325	11.616	7.287	4.365	0.491	0.278	0	0.36	0	Up in Female	EGFL8	RATEpidermal growth factor-like protein 8 OS=Rattus norvegicus OX=10116 GN=Egfl8 PE=2 SV=1
TRINITY_DN1472_c0_g1_i4	-4.99844	10.5457	12.3545	0.000439933	0.0397564	351.47	46.088	2.45	8.082	0.241	10.9	1.199	1.199	Up in Female	JAL9	ARATHJacalin-related lectin 9 OS=Arabidopsis thaliana OX=3702 GN=JAL9 PE=3 SV=1
TRINITY_DN43_c0_g1_i14	-3.24273	8.62563	12.5302	0.000400416	0.0381087	18.051	10.199	8.998	1.013	0.965	1.027	1.379	0.722	Up in Female	PTPRQ	MOUSEPhosphatidylinositol phosphatase PTPRQ OS=Mus musculus OX=10090 GN=Ptprq PE=1 SV=1
TRINITY_DN7586_c0_g1_i6	3.20257	11.672	13.9674	0.000186008	0.0246693	11.739	4.633	9.783	8.98	23.188	65.097	46.664	212.521	Up in Male	TBB4B	BOVINTubulin beta-4B chain OS=Bos taurus OX=9913 GN=TUBB4B PE=2 SV=1
TRINITY_DN2446_c0_g1_i1	3.42271	8.87253	14.5076	0.000139597	0.0200957	0.823	0.795	0.483	0.33	1.337	7.59	4.41	13.838	Up in Male	NIPBL	MOUSENipped-B-like protein OS=Mus musculus OX=10090 GN=Nipbl PE=1 SV=1
TRINITY_DN2911_c0_g1_i10	3.43913	7.65088	12.1328	0.000495422	0.0420396	0.622	0.406	0.302	0.461	1.3	2.987	1.832	14.782	Up in Male	PACRG	MOUSEParkin coregulated gene protein homolog OS=Mus musculus OX=10090 GN=Pacrg PE=1 SV=1
TRINITY_DN3958_c0_g1_i1	3.54617	7.25841	14.5586	0.000135864	0.0199357	0.359	0.406	0.587	0.514	2.051	4.708	3.725	12.936	Up in Male	KAD7	HUMANAdenylate kinase 7 OS=Homo sapiens OX=9606 GN=AK7 PE=1 SV=3
TRINITY_DN233_c0_g1_i2	3.54978	6.1182	12.8642	0.000334934	0.0342674	0.14	0.112	0.319	0.238	2.85	2.045	2.312	3.141	Up in Male	MRP4	HUMANMultidrug resistance-associated protein 4 OS=Homo sapiens OX=9606 GN=ABCC4 PE=1 SV=3
TRINITY_DN8968_c0_g1_i5	3.56236	7.72532	13.9306	0.000189684	0.0249092	0.867	0.588	0.802	0.568	2.423	6.182	3.742	23.335	Up in Male	EFHC1	HUMANEF-hand domain-containing protein 1 OS=Homo sapiens OX=9606 GN=EFHC1 PE=1 SV=1
TRINITY_DN6524_c0_g1_i19	3.61972	6.39109	12.6152	0.000382622	0.0370325	0.131	0.069	0.069	0.184	0.473	2.007	1.267	2.462	Up in Male	DHRS7	HUMANDehydrogenase/reductase SDR family member 7 OS=Homo sapiens OX=9606 GN=DHRS7 PE=1 SV=1
TRINITY_DN10625_c0_g4_i4	3.77956	7.10445	13.9267	0.000190077	0.0249092	0.193	0.579	0.466	0.33	1.587	2.958	3.245	15.016	Up in Male	NDC80	XENTRKinetochore protein NDC80 homolog OS=Xenopus tropicalis OX=8364 GN=ndc80 PE=2 SV=1
TRINITY_DN6884_c0_g1_i44	3.79394	8.36113	11.8635	0.000572446	0.0457695	1.024	1.167	0.414	0.698	1.921	3.234	2.406	40.94	Up in Male	SPAG1	HUMANSperm-associated antigen 1 OS=Homo sapiens OX=9606 GN=SPAG1 PE=1 SV=3
TRINITY_DN319_c0_g1_i10	3.82672	9.48981	16.4755	4.9284e-05	0.010532	1.015	0.475	0.466	0.491	2.469	5.013	4.469	25.033	Up in Male	NOG1	MOUSENucleolar GTP-binding protein 1 OS=Mus musculus OX=10090 GN=Gtpbp4 PE=1 SV=3
TRINITY_DN6758_c0_g1_i2	3.89486	6.00271	11.6219	0.000651811	0.049529	0.438	0.277	0.518	0.161	1.55	3.358	2.474	14.856	Up in Male	DRC11	HUMANDynein regulatory complex protein 11 OS=Homo sapiens OX=9606 GN=IQCA1 PE=2 SV=1
TRINITY_DN32081_c0_g1_i1	4.24519	5.72765	12.9014	0.000328334	0.0337125	0.079	0.078	0.129	0.092	0.399	1.703	1.319	4.425	Up in Male	SAX3	CAEELProtein sax-3 OS=Caenorhabditis elegans OX=6239 GN=sax-3 PE=2 SV=1
TRINITY_DN319_c0_g1_i7	4.44828	9.32788	13.1113	0.000293512	0.0318036	0	0.475	0.466	0.499	1.912	3.424	4.29	24.174	Up in Male	NOG1	MOUSENucleolar GTP-binding protein 1 OS=Mus musculus OX=10090 GN=Gtpbp4 PE=1 SV=3
TRINITY_DN2911_c0_g1_i5	4.56222	6.74916	14.9753	0.000108929	0.017336	1.278	0.346	0.664	0.952	3.88	8.408	7.355	66.451	Up in Male	PACRG	HUMANParkin coregulated gene protein OS=Homo sapiens OX=9606 GN=PACRG PE=1 SV=2
TRINITY_DN7637_c0_g1_i3	4.72733	6.68012	15.0338	0.0001056	0.0171882	0	0.251	0.267	0.084	1.216	2.73	1.935	10.75	Up in Male	LCA5	HUMANLebercilin OS=Homo sapiens OX=9606 GN=LCA5 PE=1 SV=2
TRINITY_DN279_c1_g1_i10	4.7378	7.89761	14.1145	0.000172009	0.0234645	0	0.363	0.129	0.061	0.529	3.053	1.31	10.124	Up in Male	SPG17	HUMANSperm-associated antigen 17 OS=Homo sapiens OX=9606 GN=SPAG17 PE=2 SV=1
TRINITY_DN561_c0_g1_i13	4.81922	6.44988	13.7802	0.000205492	0.0257833	0	0.061	0.181	0.107	0.529	2.216	0.711	7.513	Up in Male	PROM1	MOUSEProminin-1 OS=Mus musculus OX=10090 GN=Prom1 PE=1 SV=1
TRINITY_DN12444_c0_g1_i2	4.88513	9.42842	23.6236	1.17142e-06	0.000599243	0.7	0.985	0.63	0.591	4.623	15.114	8.357	62.577	Up in Male	MYLIP	RATE3 ubiquitin-protein ligase MYLIP OS=Rattus norvegicus OX=10116 GN=Mylip PE=2 SV=1
TRINITY_DN6884_c0_g1_i24	4.93153	8.55335	16.4274	5.05498e-05	0.0106478	0.7	0.519	0.052	0.246	2.042	2.758	3.108	40.845	Up in Male	SPAG1	MOUSESperm-associated antigen 1 OS=Mus musculus OX=10090 GN=Spag1 PE=1 SV=1
TRINITY_DN9617_c0_g1_i1	4.94948	6.79292	16.0003	6.33317e-05	0.0126267	0.114	0.095	0.078	0.13	0.306	1.598	0.993	11.45	Up in Male	GTPB3	DANREtRNA modification GTPase GTPBP3, mitochondrial OS=Danio rerio OX=7955 GN=gtpbp3 PE=2 SV=1
TRINITY_DN1235_c0_g1_i2	5.05184	5.80626	14.5342	0.000137641	0.0199357	0	0.026	0.147	0.115	1.067	1.693	1.558	6.728	Up in Male	RSH6A	HUMANRadial spoke head protein 6 homolog A OS=Homo sapiens OX=9606 GN=RSPH6A PE=2 SV=1
TRINITY_DN1_c0_g1_i52	5.12824	9.95639	14.6472	0.000129624	0.0194415	0.368	0.156	0.026	0	1.225	2.739	2.098	13.583	Up in Male	DYH1	HUMANDynein heavy chain 1, axonemal OS=Homo sapiens OX=9606 GN=DNAH1 PE=1 SV=5
TRINITY_DN105_c2_g1_i24	5.17304	6.82251	13.065	0.000300861	0.0318036	0.14	0	0	0	0.603	0.571	1.105	3.311	Up in Male	TRAF5	MOUSETNF receptor-associated factor 5 OS=Mus musculus OX=10090 GN=Traf5 PE=1 SV=1
TRINITY_DN2467_c0_g2_i3	5.42548	8.33454	27.2518	1.78612e-07	0.000128523	0.236	0.121	0.069	0.061	1.225	5.355	3.81	11.609	Up in Male	FTCD	DICDIFormimidoyltransferase-cyclodeaminase OS=Dictyostelium discoideum OX=44689 GN=ftcd PE=3 SV=1
TRINITY_DN321_c0_g1_i25	5.5342	6.78865	14.0844	0.000174787	0.0236586	0	0	0	0.146	0.455	1.665	1.515	4.86	Up in Male	GPTC3	MOUSEG patch domain-containing protein 3 OS=Mus musculus OX=10090 GN=Gpatch3 PE=2 SV=1
TRINITY_DN11601_c0_g1_i4	5.60943	5.7174	14.8195	0.000118304	0.0183192	0.184	0.069	0	0	1.067	2.511	1.25	8.871	Up in Male	LEXM	HUMANLymphocyte expansion molecule OS=Homo sapiens OX=9606 GN=LEXM PE=2 SV=4
TRINITY_DN5215_c0_g1_i27	5.75762	4.74141	12.2016	0.000477497	0.0418046	0.088	0	0	0.077	0.408	1.883	1.567	9.317	Up in Male	LYAM2	HUMANE-selectin OS=Homo sapiens OX=9606 GN=SELE PE=1 SV=1
TRINITY_DN960_c0_g1_i18	5.82207	5.78074	14.7546	0.000122449	0.0185597	0	0.078	0	0	0.752	1.322	1.704	0.244	Up in Male	DNLI4	CHICKDNA ligase 4 OS=Gallus gallus OX=9031 GN=LIG4 PE=2 SV=2
TRINITY_DN2282_c0_g1_i10	5.82343	6.85533	24.5714	7.16059e-07	0.000410259	0.088	0	0.052	0.038	1.559	1.703	1.721	7.078	Up in Male	PDE5	CAEELProbable 3',5'-cyclic phosphodiesterase pde-5 OS=Caenorhabditis elegans OX=6239 GN=pde-5 PE=3 SV=3
TRINITY_DN6161_c0_g1_i13	5.88816	5.31354	13.3503	0.000258385	0.0293728	0	0	0	0.061	0.204	0.837	0.805	3.205	Up in Male	SIF2	DROMEProtein still life, isoforms C/SIF type 2 OS=Drosophila melanogaster OX=7227 GN=sif PE=2 SV=2
TRINITY_DN7709_c0_g1_i28	5.89222	4.97557	14.0812	0.000175084	0.0236586	0	0	0.052	0	0.446	0.866	0.659	1.762	Up in Male	IQCB1	HUMANIQ calmodulin-binding motif-containing protein 1 OS=Homo sapiens OX=9606 GN=IQCB1 PE=1 SV=1
TRINITY_DN425_c0_g1_i6	6.05166	9.46687	15.9624	6.46119e-05	0.0127651	0.105	3.017	0.544	0.322	193.401	5.954	0.334	67.034	Up in Male	PSBA	THAPSPhotosystem II protein D1 OS=Thalassiosira pseudonana OX=35128 GN=psbA PE=3 SV=1
TRINITY_DN14538_c0_g1_i4	6.07415	6.92457	25.3887	4.68657e-07	0.000282199	0.131	0.078	0	0.046	1.262	5.098	2.903	9.964	Up in Male	HORM1	RATHORMA domain-containing protein 1 OS=Rattus norvegicus OX=10116 GN=Hormad1 PE=1 SV=1
TRINITY_DN6894_c0_g1_i17	6.10159	3.24526	11.6671	0.000636165	0.0491219	0	0	0	0	0.102	0.257	0.308	0.488	Up in Male	FBXL4	BOVINF-box/LRR-repeat protein 4 OS=Bos taurus OX=9913 GN=FBXL4 PE=2 SV=1
TRINITY_DN1954_c0_g1_i16	6.10419	3.06992	12.0227	0.000525567	0.0433888	0	0	0	0	0.195	0.124	0.146	0.096	Up in Male	UVR8	ARATHUltraviolet-B receptor UVR8 OS=Arabidopsis thaliana OX=3702 GN=UVR8 PE=1 SV=1
TRINITY_DN623_c0_g1_i17	6.21358	5.146	14.7854	0.000120462	0.0183557	0	0	0	0.069	0.668	1.341	0.968	5.115	Up in Male	FCGBP	HUMANIgGFc-binding protein OS=Homo sapiens OX=9606 GN=FCGBP PE=1 SV=3
TRINITY_DN6778_c0_g1_i10	6.21816	3.1934	11.6442	0.000644021	0.0493296	0	0	0	0	0.084	0.285	0.068	0.287	Up in Male	S38A1	HUMANSodium-coupled neutral amino acid transporter 1 OS=Homo sapiens OX=9606 GN=SLC38A1 PE=1 SV=1
TRINITY_DN6407_c0_g1_i6	6.23122	3.1585	12.1544	0.000489723	0.0419633	0	0	0	0	0.316	1.037	0.813	0.615	Up in Male	SOCS6	MOUSESuppressor of cytokine signaling 6 OS=Mus musculus OX=10090 GN=Socs6 PE=1 SV=2
TRINITY_DN6792_c0_g1_i20	6.23182	3.15921	12.0462	0.000518981	0.0430934	0	0	0	0	0.121	0.266	0.325	0.127	Up in Male	IQCE	HUMANIQ domain-containing protein E OS=Homo sapiens OX=9606 GN=IQCE PE=1 SV=2
TRINITY_DN6982_c0_g1_i4	6.25654	6.72464	20.7141	5.33226e-06	0.00206041	0.07	0	0.017	0.015	0.362	1.389	0.599	6.367	Up in Male	WDR87	HUMANWD repeat-containing protein 87 OS=Homo sapiens OX=9606 GN=WDR87 PE=1 SV=3
TRINITY_DN2341_c0_g1_i11	6.25799	3.17713	12.1748	0.000484402	0.0418323	0	0	0	0	0.186	0.438	0.137	0.393	Up in Male	DMC1	HUMANMeiotic recombination protein DMC1/LIM15 homolog OS=Homo sapiens OX=9606 GN=DMC1 PE=1 SV=2
TRINITY_DN2965_c0_g1_i17	6.26514	7.00126	19.2156	1.16754e-05	0.00355815	0	0	0	0.154	0.594	4.499	3.862	6.176	Up in Male	SAMTR	XENLAS-adenosylmethionine sensor upstream of mTORC1 OS=Xenopus laevis OX=8355 GN=bmt2 PE=2 SV=1
TRINITY_DN5247_c0_g1_i1	6.31772	7.01552	30.2289	3.83954e-08	3.5481e-05	0.096	0.052	0.026	0.031	1.671	4.775	2.706	9.71	Up in Male	F227B	MACFAProtein FAM227B OS=Macaca fascicularis OX=9541 GN=FAM227B PE=2 SV=1
TRINITY_DN78703_c0_g1_i1	6.34284	4.71242	14.2212	0.00016253	0.0224624	0	0.086	0	0	0.446	2.016	1.978	4.086	Up in Male	ZGLP1	HUMANGATA-type zinc finger protein 1 OS=Homo sapiens OX=9606 GN=ZGLP1 PE=2 SV=1
TRINITY_DN7025_c0_g1_i17	6.41977	3.2942	12.7649	0.000353186	0.0353767	0	0	0	0	0.149	0.428	0.334	0.223	Up in Male	KINX	DICDIProbable serine/threonine-protein kinase kinX OS=Dictyostelium discoideum OX=44689 GN=kinX PE=3 SV=2
TRINITY_DN1768_c0_g1_i8	6.44503	3.31374	12.4666	0.000414299	0.0386735	0	0	0	0	0.195	0.219	0.411	0.106	Up in Male	RHG35	XENLARho GTPase-activating protein 35 OS=Xenopus laevis OX=8355 GN=arhgap35 PE=1 SV=1
TRINITY_DN7640_c1_g1_i30	6.47763	3.33734	12.5194	0.000402757	0.0382046	0	0	0	0	0.093	0.38	0.317	0.446	Up in Male	GATM	DANREGlycine amidinotransferase, mitochondrial OS=Danio rerio OX=7955 GN=gatm PE=2 SV=1
TRINITY_DN34426_c0_g1_i19	6.48833	7.19012	26.9634	2.07342e-07	0.000144872	0.105	0	0.078	0	1.058	6.192	5.343	5.507	Up in Male	SHEP	DROGRProtein alan shepard OS=Drosophila grimshawi OX=7222 GN=shep PE=3 SV=1
TRINITY_DN27225_c0_g1_i9	6.49999	3.35378	12.7909	0.000348316	0.035126	0	0	0	0	0.223	0.504	0.334	0.828	Up in Male	KCY	SCHPOUridylate kinase OS=Schizosaccharomyces pombe (strain 972 / ATCC 24843) OX=284812 GN=SPCC1795.05c PE=3 SV=1
TRINITY_DN2902_c0_g1_i35	6.51956	3.36908	12.2773	0.000458504	0.0406316	0	0	0	0	1.346	0.866	1.858	0.297	Up in Male	STML2	MOUSEStomatin-like protein 2, mitochondrial OS=Mus musculus OX=10090 GN=Stoml2 PE=1 SV=1
TRINITY_DN2577_c0_g1_i7	6.52646	3.36936	11.8345	0.000581421	0.0458842	0	0	0	0	0.418	0.837	0.06	0.318	Up in Male	DHGL	DROMEGlucose dehydrogenase
TRINITY_DN6993_c0_g1_i24	6.55161	3.39212	13.4126	0.000249941	0.0292858	0	0	0	0	0.158	0.19	0.146	0.223	Up in Male	DIX1A	DANREDixin-A OS=Danio rerio OX=7955 GN=dixdc1a PE=1 SV=1
TRINITY_DN5129_c0_g1_i50	6.57739	3.41012	13.0276	0.000306933	0.0322422	0	0	0	0	0.241	0.39	0.094	0.233	Up in Male	HXNY	EMENI2-oxoglutarate-Fe(II) type oxidoreductase hxnY OS=Emericella nidulans (strain FGSC A4 / ATCC 38163 / CBS 112.46 / NRRL 194 / M139) OX=227321 GN=hxnY PE=2 SV=1
TRINITY_DN58264_c0_g1_i14	6.59355	5.08459	15.0182	0.000106478	0.0172004	0	0	0.362	0	1.689	27.146	4.478	15.345	Up in Male	TBA3C	HUMANTubulin alpha-3C chain OS=Homo sapiens OX=9606 GN=TUBA3C PE=1 SV=1
TRINITY_DN5215_c0_g1_i20	6.59713	3.42861	11.9037	0.000560218	0.0453019	0	0	0	0	0.399	1.037	1.13	4.436	Up in Male	LYAM2	RATE-selectin OS=Rattus norvegicus OX=10116 GN=Sele PE=2 SV=1
TRINITY_DN19005_c0_g1_i26	6.63408	3.45452	13.7269	0.000211405	0.0258809	0	0	0	0	0.167	0.19	0.188	0.212	Up in Male	FACD2	HUMANFanconi anemia group D2 protein OS=Homo sapiens OX=9606 GN=FANCD2 PE=1 SV=2
TRINITY_DN4054_c0_g1_i9	6.64152	3.4606	13.6289	0.000222733	0.0268094	0	0	0	0	0.176	0.152	0.223	0.255	Up in Male	GLGB	MOUSE1,4-alpha-glucan-branching enzyme OS=Mus musculus OX=10090 GN=Gbe1 PE=1 SV=1
TRINITY_DN11608_c0_g1_i15	6.73165	3.5289	13.8257	0.000200575	0.0256512	0	0	0	0	0.139	0.228	0.12	0.233	Up in Male	TMM62	MOUSETransmembrane protein 62 OS=Mus musculus OX=10090 GN=Tmem62 PE=2 SV=1
TRINITY_DN584_c1_g1_i41	6.73591	3.5315	13.1681	0.000284759	0.0313255	0	0	0	0	0.232	0.124	0.043	0.159	Up in Male	SYEP	CRIGRBifunctional glutamate/proline--tRNA ligase OS=Cricetulus griseus OX=10029 GN=EPRS PE=1 SV=3
TRINITY_DN24243_c0_g1_i39	6.77593	3.55926	12.7469	0.000356596	0.0355938	0	0	0	0	0.371	1.027	0.146	0.191	Up in Male	ZNT2	MOUSEZinc transporter 2 OS=Mus musculus OX=10090 GN=Slc30a2 PE=1 SV=1
TRINITY_DN926_c0_g1_i74	6.78148	3.56546	13.357	0.000257465	0.0293728	0	0	0	0	0.464	0.694	0.154	0.233	Up in Male	OAT	BOVINOrnithine aminotransferase, mitochondrial OS=Bos taurus OX=9913 GN=OAT PE=2 SV=1
TRINITY_DN15670_c0_g1_i15	6.803	3.58596	13.4546	0.000244404	0.0289316	0	0	0	0	0.13	0.352	0.548	0.276	Up in Male	POL5	DROMERetrovirus-related Pol polyprotein from transposon opus OS=Drosophila melanogaster OX=7227 GN=pol PE=4 SV=1
TRINITY_DN3330_c0_g1_i9	6.81647	3.59732	12.1506	0.000490722	0.0419633	0	0	0	0	0.186	0.989	0.745	3.449	Up in Male	FOXJ3	HUMANForkhead box protein J3 OS=Homo sapiens OX=9606 GN=FOXJ3 PE=1 SV=2
TRINITY_DN17929_c0_g1_i2	6.81896	3.59638	13.7664	0.000207008	0.0257833	0	0	0	0	0.381	0.485	0.351	0.138	Up in Male	RABEK	MOUSERab9 effector protein with kelch motifs OS=Mus musculus OX=10090 GN=Rabepk PE=1 SV=2
TRINITY_DN3451_c0_g1_i15	6.84069	3.61431	14.2689	0.00015846	0.0221434	0	0	0	0	0.13	0.171	0.18	0.106	Up in Male	SETD6	XENTRN-lysine methyltransferase setd6 OS=Xenopus tropicalis OX=8364 GN=setd6 PE=2 SV=1
TRINITY_DN16253_c0_g1_i28	6.88674	3.64812	13.7382	0.000210136	0.0258359	0	0	0	0	0.139	0.38	0.12	0.085	Up in Male	UBP47	CHICKUbiquitin carboxyl-terminal hydrolase 47 OS=Gallus gallus OX=9031 GN=USP47 PE=3 SV=1
TRINITY_DN444_c0_g2_i1	6.89614	10.9604	40.5482	1.91823e-10	3.92511e-07	0.096	0.052	0.043	0.169	2.887	10.054	6.302	28.461	Up in Male	DYH5	HUMANDynein heavy chain 5, axonemal OS=Homo sapiens OX=9606 GN=DNAH5 PE=1 SV=3
TRINITY_DN10977_c0_g1_i19	6.92863	3.68081	13.7114	0.000213152	0.0259836	0	0	0	0	0.427	0.694	0.103	0.244	Up in Male	DZAN1	HUMANDouble zinc ribbon and ankyrin repeat-containing protein 1 OS=Homo sapiens OX=9606 GN=DZANK1 PE=1 SV=3
TRINITY_DN7151_c0_g1_i6	6.95803	3.70903	12.1033	0.00050333	0.0424085	0	0	0	0	0.149	1.103	0.437	3.884	Up in Male	PPR3C	BOVINProtein phosphatase 1 regulatory subunit 3C OS=Bos taurus OX=9913 GN=PPP1R3C PE=2 SV=1
TRINITY_DN4802_c0_g1_i6	6.96128	9.03515	34.6897	3.86676e-09	5.53855e-06	1.444	1.366	0.224	1.205	29.927	99.766	53.316	400.677	Up in Male	TBA	LYTPITubulin alpha chain (Fragment) OS=Lytechinus pictus OX=7653 PE=3 SV=1
TRINITY_DN7151_c0_g1_i11	6.96288	3.71287	12.6121	0.000383251	0.0370325	0	0	0	0	0.362	1.313	0.634	5.041	Up in Male	PPR3C	BOVINProtein phosphatase 1 regulatory subunit 3C OS=Bos taurus OX=9913 GN=PPP1R3C PE=2 SV=1
TRINITY_DN3494_c0_g1_i37	6.9825	3.7278	14.5976	0.000133084	0.0197537	0	0	0	0	0.139	0.228	0.325	0.361	Up in Male	MCCB	CAEELProbable methylcrotonoyl-CoA carboxylase beta chain, mitochondrial OS=Caenorhabditis elegans OX=6239 GN=F02A9.10 PE=3 SV=1
TRINITY_DN14724_c0_g2_i5	6.99301	3.73885	12.7954	0.000347472	0.035126	0	0	0	0	0.111	0.295	0.711	1.846	Up in Male	NSUN7	MOUSEPutative methyltransferase NSUN7 OS=Mus musculus OX=10090 GN=Nsun7 PE=2 SV=2
TRINITY_DN86_c0_g1_i7	6.99945	11.5859	42.8281	5.97669e-11	1.71214e-07	0.805	0.657	0.673	0.422	14.973	67.104	35.995	229.096	Up in Male	TBA1D	BOVINTubulin alpha-1D chain OS=Bos taurus OX=9913 GN=TUBA1D PE=1 SV=1
TRINITY_DN52334_c0_g1_i1	7.00132	6.75514	27.3246	1.72005e-07	0.000128523	0.368	0	0.147	0	6.275	14.457	11.953	46.798	Up in Male	PCR2	ARATHProtein PLANT CADMIUM RESISTANCE 2 OS=Arabidopsis thaliana OX=3702 GN=PCR2 PE=1 SV=1
TRINITY_DN319_c0_g1_i19	7.01254	5.32576	16.2333	5.59998e-05	0.0115412	0	0	0.259	0	3.184	2.949	4.067	37.852	Up in Male	LYAM3	MOUSEP-selectin OS=Mus musculus OX=10090 GN=Selp PE=1 SV=1
TRINITY_DN1508_c0_g1_i13	7.03503	6.63609	23.3558	1.3464e-06	0.000642838	0	0.078	0	0	0.631	2.102	1.379	6.049	Up in Male	UBP7	CHICKUbiquitin carboxyl-terminal hydrolase 7 OS=Gallus gallus OX=9031 GN=USP7 PE=2 SV=1
TRINITY_DN1034_c0_g1_i3	7.04486	3.77656	14.9502	0.000110389	0.0174713	0	0	0	0	0.529	0.504	0.42	0.223	Up in Male	ESTD	RATS-formylglutathione hydrolase OS=Rattus norvegicus OX=10116 GN=Esd PE=2 SV=1
TRINITY_DN4381_c0_g1_i112	7.04956	3.77968	14.8654	0.000115459	0.0180741	0	0	0	0	0.353	0.618	0.188	0.435	Up in Male	FBX16	HUMANF-box only protein 16 OS=Homo sapiens OX=9606 GN=FBXO16 PE=2 SV=1
TRINITY_DN8340_c0_g1_i2	7.06219	7.56129	12.374	0.000435348	0.0396073	0	0.164	0	0	14.49	0.409	0	6.94	Up in Male	RDRP	CPMV1RNA-directed RNA polymerase OS=Cryphonectria parasitica mitovirus 1 (strain American chestnut tree/New Jersey/NB631) OX=186769 PE=3 SV=1
TRINITY_DN2158_c0_g1_i15	7.07967	3.80466	13.8994	0.000192857	0.0249092	0	0	0	0	0.093	0.847	0.591	0.329	Up in Male	EXO1	DANREExonuclease 1 OS=Danio rerio OX=7955 GN=exo1 PE=2 SV=1
TRINITY_DN47851_c0_g1_i3	7.09018	3.81651	11.6385	0.000645999	0.0493462	0	0	0	0	0.557	0	0.274	0.541	Up in Male	ZFR2	HUMANZinc finger RNA-binding protein 2 OS=Homo sapiens OX=9606 GN=ZFR2 PE=2 SV=3
TRINITY_DN2398_c0_g1_i7	7.10702	3.82703	15.0638	0.000103936	0.0170743	0	0	0	0	0.408	0.304	0.274	0.149	Up in Male	WASC4	MOUSEWASH complex subunit 4 OS=Mus musculus OX=10090 GN=Washc4 PE=1 SV=2
TRINITY_DN461_c1_g1_i120	7.16134	3.87005	14.5507	0.000136436	0.0199357	0	0	0	0	0.13	0.247	0.12	0.042	Up in Male	TTLL1	BOVINProbable tubulin polyglutamylase TTLL1 OS=Bos taurus OX=9913 GN=TTLL1 PE=2 SV=1
TRINITY_DN319_c0_g1_i23	7.16836	7.17997	19.8979	8.16893e-06	0.00288119	0	0	0.095	0	0.325	1.864	1.045	13.021	Up in Male	RECK	HUMANReversion-inducing cysteine-rich protein with Kazal motifs OS=Homo sapiens OX=9606 GN=RECK PE=1 SV=1
TRINITY_DN809_c0_g1_i213	7.20181	3.90818	11.8088	0.000589515	0.0462681	0	0	0	0	0.158	0	0.103	0.074	Up in Male	RPA1	HUMANDNA-directed RNA polymerase I subunit RPA1 OS=Homo sapiens OX=9606 GN=POLR1A PE=1 SV=2
TRINITY_DN2491_c0_g1_i3	7.22679	6.81384	20.045	7.56426e-06	0.0027717	0	0	0.121	0	0.919	1.389	1.224	18.305	Up in Male	WIPI4	HUMANWD repeat domain phosphoinositide-interacting protein 4 OS=Homo sapiens OX=9606 GN=WDR45 PE=1 SV=1
TRINITY_DN2413_c0_g1_i39	7.23174	4.56769	12.2869	0.000456156	0.0405823	0	0	0	0	0.149	0.38	0.368	0	Up in Male	STK25	BOVINSerine/threonine-protein kinase 25 OS=Bos taurus OX=9913 GN=STK25 PE=2 SV=1
TRINITY_DN26236_c0_g2_i1	7.23361	5.54913	12.2401	0.000467733	0.0412064	0	0.043	0	0	5.523	0.162	0	2.993	Up in Male	NICA	PSEPUPutative nicotine oxidoreductase OS=Pseudomonas putida OX=303 GN=nicA PE=4 SV=1
TRINITY_DN9866_c0_g1_i24	7.23488	3.93368	15.1772	9.78785e-05	0.016309	0	0	0	0	0.529	0.799	1.002	1.825	Up in Male	HAP2B	ORYSJProtein HAPLESS 2-B OS=Oryza sativa subsp. japonica OX=39947 GN=HAP2B PE=3 SV=1
TRINITY_DN6586_c0_g1_i8	7.23878	4.06598	11.8878	0.000565017	0.0454664	0	0	0	0	0	0.295	0.557	0.509	Up in Male	TAF3	HUMANTranscription initiation factor TFIID subunit 3 OS=Homo sapiens OX=9606 GN=TAF3 PE=1 SV=1
TRINITY_DN7213_c0_g1_i8	7.25324	3.95122	11.9553	0.000544917	0.0445069	0	0	0	0	0.26	0	0.214	0.138	Up in Male	LRRK1	MOUSELeucine-rich repeat serine/threonine-protein kinase 1 OS=Mus musculus OX=10090 GN=Lrrk1 PE=1 SV=1
TRINITY_DN4268_c1_g1_i61	7.25521	3.95173	11.8998	0.000561391	0.0453019	0	0	0	0	0.26	0	0.103	0.244	Up in Male	RBGP1	MOUSERab GTPase-activating protein 1 OS=Mus musculus OX=10090 GN=Rabgap1 PE=1 SV=1
TRINITY_DN6984_c0_g1_i10	7.27119	3.9628	15.8586	6.82546e-05	0.0128652	0	0	0	0	0.334	0.476	0.428	0.478	Up in Male	STIL	DANRESCL-interrupting locus protein homolog OS=Danio rerio OX=7955 GN=stil PE=1 SV=2
TRINITY_DN1563_c0_g1_i26	7.30136	3.99088	12.1857	0.000481569	0.0418046	0	0	0	0	0.39	0	0.248	0.34	Up in Male	HELZ	DANREProbable helicase with zinc finger domain OS=Danio rerio OX=7955 GN=helz PE=2 SV=1
TRINITY_DN1697_c0_g1_i1	7.32925	4.01208	16.0524	6.16124e-05	0.0124297	0	0	0	0	4.502	3.909	7.483	5.125	Up in Male	NOP10	SCHPOH/ACA ribonucleoprotein complex subunit nop10 OS=Schizosaccharomyces pombe (strain 972 / ATCC 24843) OX=284812 GN=nop10 PE=3 SV=1
TRINITY_DN5215_c0_g1_i3	7.3465	4.02718	14.3728	0.000149949	0.0212654	0	0	0	0	0.622	0.571	0.36	3.215	Up in Male	LYAM3	MOUSEP-selectin OS=Mus musculus OX=10090 GN=Selp PE=1 SV=1
TRINITY_DN4052_c1_g1_i5	7.35609	4.03319	12.1732	0.000484809	0.0418323	0	0	0	0	0	0.514	0.36	0.255	Up in Male	DPOD1	HUMANDNA polymerase delta catalytic subunit OS=Homo sapiens OX=9606 GN=POLD1 PE=1 SV=2
TRINITY_DN3671_c1_g1_i10	7.35751	4.03608	12.1306	0.000496017	0.0420396	0	0	0	0	0	0.59	0.385	0.955	Up in Male	FURI1	XENLAFurin-1 OS=Xenopus laevis OX=8355 GN=furin PE=2 SV=1
TRINITY_DN2282_c0_g1_i11	7.37433	4.04489	11.8487	0.000577015	0.0457695	0	0	0	0	0	0.866	0.154	0.488	Up in Male	PDE5	CAEELProbable 3',5'-cyclic phosphodiesterase pde-5 OS=Caenorhabditis elegans OX=6239 GN=pde-5 PE=3 SV=3
TRINITY_DN1243_c0_g1_i51	7.40562	4.07671	12.3151	0.000449314	0.0400981	0	0	0	0	0	0.457	0.488	0.297	Up in Male	SEN15	MOUSEtRNA-splicing endonuclease subunit Sen15 OS=Mus musculus OX=10090 GN=Tsen15 PE=1 SV=1
TRINITY_DN1895_c0_g1_i178	7.41306	4.0857	12.6314	0.000379316	0.0370325	0	0	0	0	0.176	0	0.197	0.244	Up in Male	SYL	THEEBLeucine--tRNA ligase OS=Thermosynechococcus elongatus (strain BP-1) OX=197221 GN=leuS PE=3 SV=1
TRINITY_DN4713_c0_g1_i9	7.4188	4.08421	15.8651	6.80215e-05	0.0128652	0	0	0	0	0.121	0.361	0.086	0.127	Up in Male	PB1	CHICKProtein polybromo-1 OS=Gallus gallus OX=9031 GN=PBRM1 PE=1 SV=1
TRINITY_DN4253_c1_g1_i47	7.42215	4.08572	12.1625	0.000487601	0.0419468	0	0	0	0	0	0.609	0.197	0.223	Up in Male	PLBL1	MOUSEPhospholipase B-like 1 OS=Mus musculus OX=10090 GN=Plbd1 PE=1 SV=1
TRINITY_DN1243_c0_g1_i10	7.42658	4.09492	12.4659	0.00041445	0.0386735	0	0	0	0	0	0.371	0.377	0.467	Up in Male	SEN15	MOUSEtRNA-splicing endonuclease subunit Sen15 OS=Mus musculus OX=10090 GN=Tsen15 PE=1 SV=1
TRINITY_DN3849_c0_g1_i39	7.43895	4.10478	12.4252	0.000423587	0.0389048	0	0	0	0	0.408	0	0.103	0.276	Up in Male	KSYK	CHICKTyrosine-protein kinase SYK OS=Gallus gallus OX=9031 GN=SYK PE=1 SV=2
TRINITY_DN3878_c0_g1_i58	7.44726	4.11154	16.6341	4.53299e-05	0.010166	0	0	0	0	0.176	0.171	0.291	0.34	Up in Male	DGKE	HUMANDiacylglycerol kinase epsilon OS=Homo sapiens OX=9606 GN=DGKE PE=1 SV=1
TRINITY_DN54064_c0_g1_i1	7.47121	4.13174	16.6164	4.57542e-05	0.010166	0	0	0	0	0.687	1.037	1.327	1.942	Up in Male	NSUN7	MOUSEPutative methyltransferase NSUN7 OS=Mus musculus OX=10090 GN=Nsun7 PE=2 SV=2
TRINITY_DN2565_c0_g1_i6	7.48124	4.13493	12.0257	0.000524725	0.0433888	0	0	0	0	0.576	1.17	0	0.881	Up in Male	PP4CB	DANRESerine/threonine-protein phosphatase 4 catalytic subunit B OS=Danio rerio OX=7955 GN=ppp4cb PE=2 SV=1
TRINITY_DN6014_c0_g3_i1	7.50938	7.79914	13.0986	0.00029551	0.0318036	0	0.182	0	0	22.324	0.247	0	11.153	Up in Male	PSBC	BIGNAPhotosystem II CP43 reaction center protein OS=Bigelowiella natans OX=227086 GN=psbC PE=3 SV=1
TRINITY_DN1268_c1_g1_i6	7.51615	4.83104	20.025	7.64354e-06	0.0027717	0	0	0	0	0.334	0.333	0.265	0.297	Up in Male	PRS10	HUMAN26S proteasome regulatory subunit 10B OS=Homo sapiens OX=9606 GN=PSMC6 PE=1 SV=1
TRINITY_DN2125_c0_g1_i34	7.53288	4.1804	12.196	0.000478917	0.0418046	0	0	0	0	1.086	0.552	0	0.679	Up in Male	LG3BP	BOVINGalectin-3-binding protein OS=Bos taurus OX=9913 GN=LGALS3BP PE=1 SV=1
TRINITY_DN936_c0_g1_i21	7.56321	4.21206	12.322	0.000447655	0.0400749	0	0	0	0	0	0.761	0.471	2.929	Up in Male	ZHANG	MOUSECREB/ATF bZIP transcription factor OS=Mus musculus OX=10090 GN=Crebzf PE=1 SV=2
TRINITY_DN4934_c0_g1_i11	7.56585	4.20799	12.4186	0.000425078	0.0389048	0	0	0	0	0.232	0.314	0	0.276	Up in Male	FBX8	MOUSEF-box only protein 8 OS=Mus musculus OX=10090 GN=Fbxo8 PE=2 SV=2
TRINITY_DN12717_c0_g1_i6	7.58258	4.22788	15.8883	6.71918e-05	0.0128652	0	0	0	0	1.977	1.645	2.423	10.474	Up in Male	SEZ6	XENLASeizure protein 6 homolog OS=Xenopus laevis OX=8355 GN=sez6 PE=2 SV=1
TRINITY_DN2273_c0_g1_i20	7.58327	4.22717	17.6179	2.70034e-05	0.00678566	0	0	0	0	0.288	0.209	0.308	0.297	Up in Male	G6PD1	MOUSEGlucose-6-phosphate 1-dehydrogenase X OS=Mus musculus OX=10090 GN=G6pdx PE=1 SV=3
TRINITY_DN1213_c0_g1_i5	7.58575	4.22541	12.4494	0.000418132	0.0386977	0	0	0	0	0.269	0.38	0	0.371	Up in Male	IFT88	MOUSEIntraflagellar transport protein 88 homolog OS=Mus musculus OX=10090 GN=Ift88 PE=1 SV=2
TRINITY_DN30_c0_g1_i5	7.58787	4.2343	13.3104	0.000263938	0.0296511	0	0	0	0	0.511	0.105	0.308	4.796	Up in Male	NETR	PONPYNeurotrypsin OS=Pongo pygmaeus OX=9600 GN=PRSS12 PE=3 SV=1
TRINITY_DN3831_c0_g1_i3	7.59822	4.23849	12.3614	0.000438296	0.0397338	0	0	0	0	0.241	0.276	0	0.584	Up in Male	SYTC	BOVINThreonine--tRNA ligase 1, cytoplasmic OS=Bos taurus OX=9913 GN=TARS1 PE=2 SV=1
TRINITY_DN4266_c0_g1_i2	7.6047	4.24485	13.1041	0.000294643	0.0318036	0	0	0	0	0	0.799	0.445	0.69	Up in Male	SOX14	CHICKTranscription factor SOX-14 OS=Gallus gallus OX=9031 GN=SOX14 PE=2 SV=1
TRINITY_DN2876_c0_g1_i79	7.60709	4.24836	15.8584	6.82623e-05	0.0128652	0	0	0	0	0.167	0.295	0.171	1.157	Up in Male	LR2BP	DANRELRP2-binding protein OS=Danio rerio OX=7955 GN=lrp2bp PE=2 SV=1
TRINITY_DN169_c0_g1_i169	7.63901	4.2741	12.4911	0.00040889	0.0384048	0	0	0	0	1.253	0.257	0.548	0	Up in Male	MK01	BOVINMitogen-activated protein kinase 1 OS=Bos taurus OX=9913 GN=MAPK1 PE=2 SV=3
TRINITY_DN271_c0_g3_i3	7.6591	4.29437	13.3365	0.000260289	0.0294723	0	0	0	0	0	0.542	0.728	0.584	Up in Male	RPAB4	BOVINDNA-directed RNA polymerases I, II, and III subunit RPABC4 OS=Bos taurus OX=9913 GN=POLR2K PE=1 SV=1
TRINITY_DN28293_c0_g1_i1	7.65915	5.89159	13.7403	0.000209897	0.0258359	0	0	0.026	0	5.597	0.114	0	2.069	Up in Male	RDRP	CPMV1RNA-directed RNA polymerase OS=Cryphonectria parasitica mitovirus 1 (strain American chestnut tree/New Jersey/NB631) OX=186769 PE=3 SV=1
TRINITY_DN872_c0_g1_i6	7.6745	4.31497	11.7595	0.000605327	0.0472502	0	0	0	0	0.046	0	1.036	0.117	Up in Male	POL3	DROMERetrovirus-related Pol polyprotein from transposon 17.6 OS=Drosophila melanogaster OX=7227 GN=pol PE=4 SV=1
TRINITY_DN914_c0_g1_i32	7.70305	4.33138	15.712	7.37564e-05	0.013458	0	0	0	0	0.362	0.704	0.248	2.897	Up in Male	PR3CB	DANREProtein phosphatase 1 regulatory subunit 3C-B OS=Danio rerio OX=7955 GN=ppp1r3cb PE=2 SV=1
TRINITY_DN3454_c0_g1_i75	7.72085	4.34765	12.4466	0.000418762	0.0386977	0	0	0	0	0.019	0.78	0.06	3.428	Up in Male	DSE1	NICBEProtein DECREASED SIZE EXCLUSION LIMIT 1 OS=Nicotiana benthamiana OX=4100 GN=DSE1 PE=2 SV=1
TRINITY_DN1674_c0_g1_i25	7.72494	4.3511	13.5001	0.000238554	0.0283562	0	0	0	0	0.9	0	0.291	0.955	Up in Male	WDR92	HUMANWD repeat-containing protein 92 OS=Homo sapiens OX=9606 GN=WDR92 PE=1 SV=1
TRINITY_DN6241_c0_g1_i16	7.76033	4.37968	13.5776	0.000228897	0.027436	0	0	0	0	0	0.98	0.479	0.881	Up in Male	NUBP2	NEMVECytosolic Fe-S cluster assembly factor NUBP2 homolog OS=Nematostella vectensis OX=45351 GN=v1g229988 PE=3 SV=1
TRINITY_DN3330_c0_g1_i5	7.76081	4.37969	17.5639	2.7781e-05	0.00686341	0	0	0	0	0.158	0.704	0.214	0.541	Up in Male	FOXD3	RATForkhead box protein D3 (Fragment) OS=Rattus norvegicus OX=10116 GN=Foxd3 PE=1 SV=1
TRINITY_DN27225_c0_g1_i10	7.76305	4.38601	12.7295	0.000359936	0.0358024	0	0	0	0	0	0.295	0.3	1.899	Up in Male	RING2	HUMANE3 ubiquitin-protein ligase RING2 OS=Homo sapiens OX=9606 GN=RNF2 PE=1 SV=1
TRINITY_DN1731_c2_g1_i6	7.77458	4.39797	13.387	0.000253371	0.0292858	0	0	0	0	0.232	0	0.916	1.305	Up in Male	SPCS2	XENTRProbable signal peptidase complex subunit 2 OS=Xenopus tropicalis OX=8364 GN=spcs2 PE=2 SV=1
TRINITY_DN3671_c1_g1_i18	7.78228	4.39869	16.5286	4.79217e-05	0.0103219	0	0	0	0	0.149	2.321	1.036	1.74	Up in Male	PCSK6	RATProprotein convertase subtilisin/kexin type 6 OS=Rattus norvegicus OX=10116 GN=Pcsk6 PE=1 SV=1
TRINITY_DN1452_c0_g1_i59	7.79181	4.40546	13.3997	0.000251661	0.0292858	0	0	0	0	0	1.189	0.265	0.891	Up in Male	MKLN1	PONABMuskelin OS=Pongo abelii OX=9601 GN=MKLN1 PE=2 SV=1
TRINITY_DN15396_c0_g1_i1	7.80117	7.39639	13.8977	0.000193034	0.0249092	0	0.475	0	0	61.311	0.352	0	46.83	Up in Male	YMN3	PODANUncharacterized 49.1 kDa protein in ND3 intron OS=Podospora anserina (strain S / ATCC MYA-4624 / DSM 980 / FGSC 10383) OX=515849 PE=1 SV=1
TRINITY_DN2483_c1_g1_i19	7.81551	4.42968	14.7869	0.000120366	0.0183557	0	0	0	0	0.186	0.647	0.068	2.621	Up in Male	RTXE	DROMEProbable RNA-directed DNA polymerase from transposon X-element OS=Drosophila melanogaster OX=7227 GN=X-element\ORF2 PE=3 SV=1
TRINITY_DN508_c1_g1_i7	7.82953	4.4436	14.1727	0.000166771	0.0228588	0	0	0	0	0.678	0	0.548	0.658	Up in Male	PLPL9	MOUSE85/88 kDa calcium-independent phospholipase A2 OS=Mus musculus OX=10090 GN=Pla2g6 PE=1 SV=3
TRINITY_DN1001_c0_g1_i9	7.87726	6.03276	22.996	1.62337e-06	0.000750077	0.035	0	0	0	0.594	3.224	0.805	9.975	Up in Male	TMC3	CHICKTransmembrane channel-like protein 3 OS=Gallus gallus OX=9031 GN=Tmc3 PE=2 SV=1
TRINITY_DN580_c0_g1_i71	7.87872	4.48273	16.6007	4.61335e-05	0.010166	0	0	0	0	0.548	0.847	0.051	0.998	Up in Male	DHX35	PONABProbable ATP-dependent RNA helicase DHX35 OS=Pongo abelii OX=9601 GN=DHX35 PE=2 SV=1
TRINITY_DN623_c0_g1_i4	7.88565	4.49133	13.4381	0.000246565	0.0290673	0	0	0	0	0	1.313	0.514	3.141	Up in Male	FCGBP	HUMANIgGFc-binding protein OS=Homo sapiens OX=9606 GN=FCGBP PE=1 SV=3
TRINITY_DN4924_c0_g1_i3	7.89099	4.49657	13.7937	0.000204018	0.0257833	0	0	0	0	0	0.504	0.668	0.223	Up in Male	RB3GP	HUMANRab3 GTPase-activating protein catalytic subunit OS=Homo sapiens OX=9606 GN=RAB3GAP1 PE=1 SV=3
TRINITY_DN914_c0_g1_i24	7.89438	4.50031	15.8593	6.82307e-05	0.0128652	0	0	0	0	0.167	0.342	0.411	2.908	Up in Male	PR3CB	DANREProtein phosphatase 1 regulatory subunit 3C-B OS=Danio rerio OX=7955 GN=ppp1r3cb PE=2 SV=1
TRINITY_DN1327_c0_g1_i23	7.90961	4.51212	18.4568	1.73797e-05	0.00488113	0	0	0	0	0.761	0.171	0.488	0.615	Up in Male	GRHL1	MOUSEGrainyhead-like protein 1 homolog OS=Mus musculus OX=10090 GN=Grhl1 PE=1 SV=1
TRINITY_DN3061_c0_g1_i8	7.92225	4.51803	13.4023	0.000251318	0.0292858	0	0	0	0	0	1.617	0.188	0.637	Up in Male	SMC2	HUMANStructural maintenance of chromosomes protein 2 OS=Homo sapiens OX=9606 GN=SMC2 PE=1 SV=2
TRINITY_DN2164_c0_g1_i8	7.93978	7.23217	13.6741	0.000217428	0.0262813	0.009	0	0	0.008	0	1.55	0	4.139	Up in Male	LRP4	HUMANLow-density lipoprotein receptor-related protein 4 OS=Homo sapiens OX=9606 GN=LRP4 PE=1 SV=4
TRINITY_DN6675_c0_g1_i17	7.94085	4.53906	19.5864	9.61533e-06	0.0031661	0	0	0	0	0.158	0.209	0.18	0.159	Up in Male	IF172	MOUSEIntraflagellar transport protein 172 homolog OS=Mus musculus OX=10090 GN=Ift172 PE=1 SV=1
TRINITY_DN127_c0_g1_i22	7.97902	11.033	31.3858	2.11525e-08	2.16413e-05	0.158	0	0.017	0.015	1.318	12.898	7.92	28.896	Up in Male	DYHC	HELCRDynein beta chain, ciliary OS=Heliocidaris crassispina OX=1043166 PE=1 SV=1
TRINITY_DN1623_c0_g1_i16	8.00973	4.60141	12.2354	0.000468925	0.0412064	0	0	0	0	1.067	0.048	0	1.496	Up in Male	TRCB	XENLABeta-TrCP OS=Xenopus laevis OX=8355 GN=fbxw1 PE=1 SV=1
TRINITY_DN1932_c0_g1_i3	8.03167	4.62401	13.352	0.000258152	0.0293728	0	0	0	0	0.139	0	0.214	1.571	Up in Male	SL9C1	MOUSESodium/hydrogen exchanger 10 OS=Mus musculus OX=10090 GN=Slc9c1 PE=1 SV=3
TRINITY_DN4135_c0_g1_i1	8.04392	4.63117	19.0205	1.29323e-05	0.00385908	0	0	0	0	0.084	0.333	0.274	0.371	Up in Male	F16P2	BOVINFructose-1,6-bisphosphatase isozyme 2 OS=Bos taurus OX=9913 GN=FBP2 PE=2 SV=1
TRINITY_DN1419_c1_g1_i2	8.04566	6.19235	21.5734	3.4054e-06	0.00137401	0.044	0	0	0	0.455	2.216	0.882	16.459	Up in Male	SPAT1	MOUSESpermatogenesis-associated protein 1 OS=Mus musculus OX=10090 GN=Spata1 PE=2 SV=1
TRINITY_DN4526_c1_g1_i9	8.05917	4.64299	12.4205	0.000424646	0.0389048	0	0	0	0	2.265	0.076	0	0.775	Up in Male	YMC6	SCHPOUncharacterized 91 kDa protein in cob intron OS=Schizosaccharomyces pombe (strain 972 / ATCC 24843) OX=284812 GN=SPMIT.06 PE=4 SV=4
TRINITY_DN8051_c0_g1_i5	8.07019	4.65606	14.4773	0.000141862	0.0203196	0	0	0	0	0	0.847	0.788	1.73	Up in Male	ZFYV1	MOUSEZinc finger FYVE domain-containing protein 1 OS=Mus musculus OX=10090 GN=Zfyve1 PE=1 SV=2
TRINITY_DN13051_c0_g1_i2	8.09719	4.67705	13.0901	0.000296855	0.0318036	0	0	0	0	2.135	0.19	0	0.838	Up in Male	RDRP	CPMV1RNA-directed RNA polymerase OS=Cryphonectria parasitica mitovirus 1 (strain American chestnut tree/New Jersey/NB631) OX=186769 PE=3 SV=1
TRINITY_DN2357_c0_g1_i3	8.12225	4.70211	18.2014	1.9873e-05	0.00543505	0	0	0	0	0.084	0.266	0.188	0.913	Up in Male	DYHC2	MOUSECytoplasmic dynein 2 heavy chain 1 OS=Mus musculus OX=10090 GN=Dync2h1 PE=1 SV=1
TRINITY_DN1546_c0_g1_i3	8.12291	4.70612	14.8449	0.000116723	0.0181726	0	0	0	0	0.306	0	0.908	0.594	Up in Male	PO22	POPJARetrovirus-related Pol polyprotein from type-1 retrotransposable element R2 (Fragment) OS=Popillia japonica OX=7064 PE=4 SV=1
TRINITY_DN1177_c0_g1_i11	8.12918	4.71123	13.0188	0.000308387	0.0322422	0	0	0	0	0	0.124	0.231	2.366	Up in Male	F184A	HUMANProtein FAM184A OS=Homo sapiens OX=9606 GN=FAM184A PE=2 SV=3
TRINITY_DN7151_c0_g1_i8	8.14057	4.71864	16.612	4.58593e-05	0.010166	0	0	0	0	0.26	2.625	0.968	8.85	Up in Male	PPR3C	BOVINProtein phosphatase 1 regulatory subunit 3C OS=Bos taurus OX=9913 GN=PPP1R3C PE=2 SV=1
TRINITY_DN7349_c0_g1_i4	8.17835	4.75339	15.2571	9.38245e-05	0.0160945	0	0	0	0	0	1.579	1.627	3.693	Up in Male	RHG19	CHICKRho GTPase-activating protein 19 OS=Gallus gallus OX=9031 GN=ARHGAP19 PE=2 SV=1
TRINITY_DN927_c0_g1_i29	8.18872	4.75385	11.7372	0.000612617	0.04756	0	0	0	0	0.418	0.476	0	0	Up in Male	F91A1	MOUSEProtein FAM91A1 OS=Mus musculus OX=10090 GN=Fam91a1 PE=1 SV=1
TRINITY_DN18729_c0_g1_i3	8.2069	4.77736	15.1764	9.79212e-05	0.016309	0	0	0	0	0	1.389	0.728	1.486	Up in Male	MSH5	MOUSEMutS protein homolog 5 OS=Mus musculus OX=10090 GN=Msh5 PE=1 SV=1
TRINITY_DN659_c0_g2_i6	8.20945	4.78257	15.4723	8.37221e-05	0.0148097	0	0	0	0	0.873	0	1.045	0.594	Up in Male	MED18	XENLAMediator of RNA polymerase II transcription subunit 18 OS=Xenopus laevis OX=8355 GN=med18 PE=2 SV=1
TRINITY_DN5215_c0_g1_i11	8.2106	4.78197	17.6259	2.68901e-05	0.00678566	0	0	0	0	0.251	1.303	0.711	5.306	Up in Male	LYAM3	MOUSEP-selectin OS=Mus musculus OX=10090 GN=Selp PE=1 SV=1
TRINITY_DN863_c0_g1_i8	8.2143	4.78551	16.5779	4.66914e-05	0.0102104	0	0	0	0	0.065	1.037	0.565	3.99	Up in Male	FINC	HUMANFibronectin OS=Homo sapiens OX=9606 GN=FN1 PE=1 SV=5
TRINITY_DN2767_c0_g1_i7	8.22244	4.79254	15.2763	9.28741e-05	0.0160945	0	0	0	0	0	0.904	0.745	1.369	Up in Male	HEAT4	HUMANHEAT repeat-containing protein 4 OS=Homo sapiens OX=9606 GN=HEATR4 PE=2 SV=2
TRINITY_DN3530_c0_g1_i32	8.2298	7.22689	33.7484	6.27193e-09	8.1669e-06	0.035	0	0	0.023	0.789	6.106	3.331	14.984	Up in Male	DGLB	HUMANSn1-specific diacylglycerol lipase beta OS=Homo sapiens OX=9606 GN=DAGLB PE=1 SV=2
TRINITY_DN17680_c0_g1_i11	8.23391	4.80126	12.6981	0.000366019	0.0362815	0	0	0	0	27.161	0.457	0	15.175	Up in Male	PSBA	CHLATPhotosystem II protein D1 OS=Chlorokybus atmophyticus OX=3144 GN=psbA PE=3 SV=2
TRINITY_DN375_c0_g1_i16	8.24559	4.81119	14.2314	0.000161653	0.0224624	0	0	0	0	0	0.571	0.051	0.732	Up in Male	HAP2	NEMVEHapless 2 OS=Nematostella vectensis OX=45351 GN=HAP2 PE=1 SV=1
TRINITY_DN4987_c0_g1_i20	8.24654	4.81532	15.6565	7.59493e-05	0.0137383	0	0	0	0	0.473	0	0.36	0.265	Up in Male	DRC7	XENTRDynein regulatory complex subunit 7 OS=Xenopus tropicalis OX=8364 GN=drc7 PE=2 SV=1
TRINITY_DN1604_c0_g1_i12	8.24958	4.81895	15.0112	0.000106876	0.0172004	0	0	0	0	0	0.152	0.308	0.647	Up in Male	MSH6	CHICKDNA mismatch repair protein Msh6 OS=Gallus gallus OX=9031 GN=MSH6 PE=3 SV=2
TRINITY_DN2491_c0_g1_i7	8.25404	4.82012	19.3996	1.06031e-05	0.0034129	0	0	0	0	0.436	0.856	0.197	1.868	Up in Male	WIPI4	HUMANWD repeat domain phosphoinositide-interacting protein 4 OS=Homo sapiens OX=9606 GN=WDR45 PE=1 SV=1
TRINITY_DN301_c0_g1_i31	8.28492	4.84956	15.7588	7.19529e-05	0.0132693	0	0	0	0	0.808	0	0.445	0.35	Up in Male	PARP4	MOUSEProtein mono-ADP-ribosyltransferase PARP4 OS=Mus musculus OX=10090 GN=Parp4 PE=1 SV=1
TRINITY_DN2705_c0_g1_i3	8.29458	4.85971	15.9962	6.34706e-05	0.0126267	0	0	0	0	0.761	0	0.968	1.029	Up in Male	SDHA	XENTRSuccinate dehydrogenase
TRINITY_DN1237_c0_g1_i67	8.32582	4.8918	11.9539	0.000545324	0.0445069	0	0	0	0	0	0	0.334	0.34	Up in Male	37500	DROMESeptin-2 OS=Drosophila melanogaster OX=7227 GN=Sep2 PE=2 SV=2
TRINITY_DN23637_c0_g1_i1	8.3475	4.9035	13.2674	0.000270066	0.0301035	0	0	0	0	1.522	0.038	0	0.382	Up in Male	PO23	POPJARetrovirus-related Pol polyprotein from type-1 retrotransposable element R2 (Fragment) OS=Popillia japonica OX=7064 PE=4 SV=1
TRINITY_DN1958_c0_g1_i2	8.3482	4.90619	15.8767	6.76055e-05	0.0128652	0	0	0	0	0	7.647	5.36	8.787	Up in Male	LYAM2	HUMANE-selectin OS=Homo sapiens OX=9606 GN=SELE PE=1 SV=1
TRINITY_DN7170_c0_g1_i1	8.3769	6.48815	16.7683	4.22319e-05	0.00967854	0	0	0	0.061	29.871	0.628	0	9.954	Up in Male	RBS	BATOERibulose bisphosphate carboxylase small chain, chloroplastic OS=Batophora oerstedii OX=3140 GN=RBCS PE=2 SV=2
TRINITY_DN2273_c0_g1_i27	8.4076	5.04772	16.1357	5.8962e-05	0.0120649	0	0	0	0	0	0.561	0.659	0.976	Up in Male	G6PD1	MOUSEGlucose-6-phosphate 1-dehydrogenase X OS=Mus musculus OX=10090 GN=G6pdx PE=1 SV=3
TRINITY_DN23301_c0_g1_i23	8.41038	4.96282	21.9201	2.8424e-06	0.00118009	0	0	0	0	0.436	0.78	0.599	1.486	Up in Male	NSD2	HUMANHistone-lysine N-methyltransferase NSD2 OS=Homo sapiens OX=9606 GN=NSD2 PE=1 SV=1
TRINITY_DN1419_c0_g1_i18	8.41318	4.96554	21.0623	4.44586e-06	0.0017689	0	0	0	0	0.362	0.571	0.351	1.634	Up in Male	Y9801	DROMEPP2C-like domain-containing protein CG9801 OS=Drosophila melanogaster OX=7227 GN=CG9801 PE=2 SV=1
TRINITY_DN3206_c0_g1_i93	8.42557	4.97432	15.2604	9.36582e-05	0.0160945	0	0	0	0	0	0.789	0.094	0.594	Up in Male	FANCI	HUMANFanconi anemia group I protein OS=Homo sapiens OX=9606 GN=FANCI PE=1 SV=4
TRINITY_DN383_c0_g1_i11	8.42963	4.98137	11.8443	0.00057837	0.0457695	0	0	0	0	0	0.352	0.471	0	Up in Male	VIGLN	HUMANVigilin OS=Homo sapiens OX=9606 GN=HDLBP PE=1 SV=2
TRINITY_DN2727_c0_g1_i7	8.4308	4.9794	11.6728	0.000634199	0.0491024	0	0	0	0	0	0.742	0	0.944	Up in Male	VPS8	MOUSEVacuolar protein sorting-associated protein 8 homolog OS=Mus musculus OX=10090 GN=Vps8 PE=1 SV=1
TRINITY_DN7775_c0_g1_i17	8.43447	5.73514	22.7499	1.84516e-06	0.000839019	0	0	0	0.015	1.058	1.389	1.344	12.363	Up in Male	TM128	MOUSETransmembrane protein 128 OS=Mus musculus OX=10090 GN=Tmem128 PE=1 SV=2
TRINITY_DN1632_c0_g1_i222	8.43707	4.9915	11.65	0.000642028	0.0493087	0	0	0	0	0	0	0.163	1.708	Up in Male	WDR19	MOUSEWD repeat-containing protein 19 OS=Mus musculus OX=10090 GN=Wdr19 PE=1 SV=1
TRINITY_DN1056_c0_g1_i14	8.44392	4.99275	14.4358	0.000145022	0.0206689	0	0	0	0	0.213	1.351	0	2.579	Up in Male	KIF9	MOUSEKinesin-like protein KIF9 OS=Mus musculus OX=10090 GN=Kif9 PE=1 SV=2
TRINITY_DN455_c0_g1_i34	8.45987	5.00784	15.8011	7.0361e-05	0.0131741	0	0	0	0	0.752	0.38	0.599	0	Up in Male	P4HA1	MOUSEProlyl 4-hydroxylase subunit alpha-1 OS=Mus musculus OX=10090 GN=P4ha1 PE=1 SV=2
TRINITY_DN8833_c0_g1_i46	8.47291	5.02057	15.4906	8.29155e-05	0.0148097	0	0	0	0	0	1.588	0.488	3.778	Up in Male	EFHB	HUMANEF-hand domain-containing family member B OS=Homo sapiens OX=9606 GN=EFHB PE=1 SV=4
TRINITY_DN1085_c0_g1_i23	8.47377	5.02555	12.1106	0.000501365	0.0423676	0	0	0	0	0	0	0.505	1.878	Up in Male	EIF3A	NEMVEEukaryotic translation initiation factor 3 subunit A OS=Nematostella vectensis OX=45351 GN=v1g190699 PE=3 SV=2
TRINITY_DN118_c0_g1_i6	8.47901	5.02413	13.9118	0.000191591	0.0249092	0	0	0	0	0.446	9.92	0	13.551	Up in Male	NETR	SAGLBNeurotrypsin OS=Saguinus labiatus OX=78454 GN=PRSS12 PE=3 SV=1
TRINITY_DN2819_c0_g1_i1	8.48885	5.0379	14.2783	0.000157671	0.0221412	0	0	0	0	0.427	0	0.608	8.85	Up in Male	KAD1	BOVINAdenylate kinase isoenzyme 1 OS=Bos taurus OX=9913 GN=AK1 PE=1 SV=2
TRINITY_DN12423_c0_g1_i1	8.50174	5.0455	13.3607	0.000256947	0.0293728	0	0	0	0	8.8	0.114	0	3.438	Up in Male	SCE1	YEASTIntron-encoded endonuclease I-SceI OS=Saccharomyces cerevisiae (strain ATCC 204508 / S288c) OX=559292 GN=SCEI PE=1 SV=1
TRINITY_DN2273_c0_g1_i15	8.51157	5.06196	12.3445	0.000442284	0.0398432	0	0	0	0	0	0	1.404	0.753	Up in Male	G6PD1	MOUSEGlucose-6-phosphate 1-dehydrogenase X OS=Mus musculus OX=10090 GN=G6pdx PE=1 SV=3
TRINITY_DN11160_c0_g1_i1	8.51629	6.70643	27.2426	1.79458e-07	0.000128523	0	0	0.017	0	0.557	0.951	0.616	8.362	Up in Male	WDY	DROGRWD repeat-containing protein on Y chromosome OS=Drosophila grimshawi OX=7222 GN=WDY PE=4 SV=1
TRINITY_DN109_c0_g1_i15	8.53883	5.08275	16.8193	4.11134e-05	0.00949819	0	0	0	0	0.715	0	0.625	1.273	Up in Male	LMNA	XENLALamin-A OS=Xenopus laevis OX=8355 GN=lmna PE=2 SV=1
TRINITY_DN43_c0_g1_i8	8.54513	5.08815	16.8759	3.99049e-05	0.00929396	0	0	0	0	0.455	0	0.36	0.255	Up in Male	FANCJ	MOUSEFanconi anemia group J protein homolog OS=Mus musculus OX=10090 GN=Brip1 PE=2 SV=1
TRINITY_DN61415_c0_g1_i1	8.54741	6.66778	25.3715	4.72843e-07	0.000282199	0	0	0	0.038	0.668	2.235	1.344	21.202	Up in Male	TSSK1	BOVINTestis-specific serine/threonine-protein kinase 1 OS=Bos taurus OX=9913 GN=TSSK1B PE=2 SV=1
TRINITY_DN3006_c0_g1_i36	8.54777	5.22879	22.0397	2.67062e-06	0.00112508	0	0	0	0	0.761	0.238	0.094	0.18	Up in Male	RIC8A	CHICKSynembryn-A OS=Gallus gallus OX=9031 GN=RIC8A PE=2 SV=1
TRINITY_DN863_c0_g1_i5	8.55036	5.09193	19.3147	1.10848e-05	0.00346459	0	0	0	0	0.167	1.598	0.711	4.659	Up in Male	FINC	HUMANFibronectin OS=Homo sapiens OX=9606 GN=FN1 PE=1 SV=5
TRINITY_DN8586_c0_g1_i2	8.55129	5.08884	15.7542	7.21293e-05	0.0132693	0	0	0	0	0.269	0.542	0	0.265	Up in Male	DYST	HUMANDystonin OS=Homo sapiens OX=9606 GN=DST PE=1 SV=4
TRINITY_DN1419_c0_g1_i33	8.5545	5.09564	17.6422	2.66606e-05	0.00678566	0	0	0	0	0.204	0.675	0.034	2.419	Up in Male	Y9801	DROMEPP2C-like domain-containing protein CG9801 OS=Drosophila melanogaster OX=7227 GN=CG9801 PE=2 SV=1
TRINITY_DN2042_c0_g1_i2	8.57163	5.11499	11.9076	0.000559047	0.0453019	0	0	0	0	0	0	0.377	5.041	Up in Male	NCKX	DROMESodium/potassium/calcium exchanger Nckx30C OS=Drosophila melanogaster OX=7227 GN=Nckx30C PE=2 SV=4
TRINITY_DN5177_c0_g1_i1	8.57322	5.11321	20.7334	5.27882e-06	0.00206041	0	0	0	0	1.392	2.311	1.807	11.461	Up in Male	TMC3	MOUSETransmembrane channel-like protein 3 OS=Mus musculus OX=10090 GN=Tmc3 PE=2 SV=1
TRINITY_DN58209_c0_g1_i2	8.58252	9.78647	33.6182	6.70634e-09	8.35289e-06	0.061	0	0	0.177	4.418	16.312	8.725	85.297	Up in Male	TEX14	BOVINInactive serine/threonine-protein kinase TEX14 OS=Bos taurus OX=9913 GN=TEX14 PE=3 SV=2
TRINITY_DN16805_c0_g1_i1	8.63065	5.16465	13.7945	0.000203933	0.0257833	0	0	0	0	4.307	0.048	0	1.708	Up in Male	GUN4	THEFUEndoglucanase E-4 OS=Thermobifida fusca OX=2021 GN=celD PE=1 SV=2
TRINITY_DN6881_c0_g1_i15	8.64854	5.18291	22.1732	2.49131e-06	0.0010652	0	0	0	0	0.26	0.323	0.514	1.634	Up in Male	LRIQ3	RATLeucine-rich repeat and IQ domain-containing protein 3 OS=Rattus norvegicus OX=10116 GN=Lrriq3 PE=2 SV=1
TRINITY_DN66_c0_g1_i1	8.65459	5.18722	12.5103	0.000404711	0.0382632	0	0	0	0	0	1.198	1.07	0	Up in Male	MDR1	CRIGRATP-dependent translocase ABCB1 OS=Cricetulus griseus OX=10029 GN=ABCB1 PE=1 SV=2
TRINITY_DN2819_c1_g1_i7	8.6809	5.212	23.4556	1.2783e-06	0.000620671	0	0	0	0	1.216	0.999	0.317	1.825	Up in Male	SYF1	MOUSEPre-mRNA-splicing factor SYF1 OS=Mus musculus OX=10090 GN=Xab2 PE=1 SV=1
TRINITY_DN22971_c0_g1_i6	8.69311	6.74156	29.9117	4.52179e-08	3.92532e-05	0	0	0.25	0	7.547	16.873	16.996	115.795	Up in Male	LYAM3	MOUSEP-selectin OS=Mus musculus OX=10090 GN=Selp PE=1 SV=1
TRINITY_DN1782_c0_g2_i89	8.7234	5.25307	17.3118	3.17205e-05	0.0076361	0	0	0	0	0	0.352	0.411	0.86	Up in Male	DNA2	RATDNA replication ATP-dependent helicase/nuclease DNA2 OS=Rattus norvegicus OX=10116 GN=Dna2 PE=3 SV=1
TRINITY_DN319_c0_g1_i11	8.72362	5.25272	18.6209	1.59463e-05	0.00456814	0	0	0	0	12.188	39.501	3.528	201.453	Up in Male	LYAM3	MOUSEP-selectin OS=Mus musculus OX=10090 GN=Selp PE=1 SV=1
TRINITY_DN2943_c0_g1_i18	8.72759	5.25665	17.5139	2.85216e-05	0.0069834	0	0	0	0	0	0.171	0.18	0.276	Up in Male	SMUF2	MOUSEE3 ubiquitin-protein ligase SMURF2 OS=Mus musculus OX=10090 GN=Smurf2 PE=1 SV=1
TRINITY_DN561_c0_g1_i33	8.7533	5.28076	16.3368	5.30236e-05	0.0110873	0	0	0	0	0	0.818	0.308	3.321	Up in Male	PROM1	MOUSEProminin-1 OS=Mus musculus OX=10090 GN=Prom1 PE=1 SV=1
TRINITY_DN24198_c0_g1_i1	8.76228	5.28699	12.67	0.000371562	0.0367039	0	0	0	0	4.224	0	0	1.549	Up in Male	FUR2	DROMEFurin-like protease 2 OS=Drosophila melanogaster OX=7227 GN=Fur2 PE=2 SV=2
TRINITY_DN15126_c0_g1_i10	8.77524	5.29937	12.7937	0.000347795	0.035126	0	0	0	0	2.748	0	0.616	0	Up in Male	RHO	APLCARas-like GTP-binding protein RHO OS=Aplysia californica OX=6500 GN=RHO PE=2 SV=1
TRINITY_DN34362_c0_g1_i21	8.77705	5.30261	20.6919	5.39432e-06	0.00206041	0	0	0	0	0.269	0.704	0.351	4.266	Up in Male	TF211	SCHPOTransposon Tf2-11 polyprotein OS=Schizosaccharomyces pombe (strain 972 / ATCC 24843) OX=284812 GN=Tf2-11 PE=3 SV=1
TRINITY_DN2341_c0_g1_i54	8.77829	5.30284	23.5432	1.2214e-06	0.000613849	0	0	0	0	0.464	3.681	2.5	3.417	Up in Male	DMC1	HUMANMeiotic recombination protein DMC1/LIM15 homolog OS=Homo sapiens OX=9606 GN=DMC1 PE=1 SV=2
TRINITY_DN3460_c0_g1_i5	8.79137	5.31935	13.294	0.000266261	0.0297952	0	0	0	0	0	0	1.242	2.632	Up in Male	GCSH	CARHZGlycine cleavage system H protein OS=Carboxydothermus hydrogenoformans (strain ATCC BAA-161 / DSM 6008 / Z-2901) OX=246194 GN=gcvH PE=3 SV=1
TRINITY_DN663_c0_g1_i5	8.82546	5.35354	11.8459	0.000577878	0.0457695	0	0	0	0	0	0.048	1.858	0	Up in Male	N6MT1	MOUSEMethyltransferase N6AMT1 OS=Mus musculus OX=10090 GN=N6amt1 PE=1 SV=1
TRINITY_DN4140_c0_g1_i11	8.82734	5.34793	22.2687	2.37045e-06	0.00104471	0	0	0	0	0.13	1.075	0.12	1.008	Up in Male	HMCN2	MOUSEHemicentin-2 OS=Mus musculus OX=10090 GN=Hmcn2 PE=1 SV=1
TRINITY_DN53124_c0_g1_i2	8.84128	5.36107	12.9878	0.000313535	0.0325429	0	0	0	0	4.892	0	0	2.186	Up in Male	YM79	YEASTUncharacterized protein YMR244W OS=Saccharomyces cerevisiae (strain ATCC 204508 / S288c) OX=559292 GN=YMR244W PE=3 SV=1
TRINITY_DN26_c0_g1_i13	8.85268	5.37222	25.7631	3.86006e-07	0.000245732	0	0	0	0	0.418	0.609	0.205	0.679	Up in Male	GUAA	HUMANGMP synthase
TRINITY_DN10965_c0_g1_i26	8.85287	5.65137	27.5722	1.51338e-07	0.000117173	0	0	0	0	0.418	0.942	0.711	1.719	Up in Male	HCN2	MOUSEPotassium/sodium hyperpolarization-activated cyclic nucleotide-gated channel 2 OS=Mus musculus OX=10090 GN=Hcn2 PE=1 SV=1
TRINITY_DN12717_c0_g1_i1	8.87556	10.4615	41.8828	9.69091e-11	2.52378e-07	0.123	0	0.121	0.207	9.969	22.656	24.334	186.841	Up in Male	LYAM2	HUMANE-selectin OS=Homo sapiens OX=9606 GN=SELE PE=1 SV=1
TRINITY_DN2282_c0_g1_i5	8.8829	5.40165	15.649	7.62521e-05	0.0137383	0	0	0	0	0.316	1.522	0	6.919	Up in Male	PDE5	CAEELProbable 3',5'-cyclic phosphodiesterase pde-5 OS=Caenorhabditis elegans OX=6239 GN=pde-5 PE=3 SV=3
TRINITY_DN8000_c0_g1_i66	8.88772	5.40731	18.1608	2.03015e-05	0.00548657	0	0	0	0	0.52	0	0.745	1.974	Up in Male	PCY1A	HUMANCholine-phosphate cytidylyltransferase A OS=Homo sapiens OX=9606 GN=PCYT1A PE=1 SV=2
TRINITY_DN1081_c0_g1_i21	8.88868	5.40574	25.8846	3.62449e-07	0.000235979	0	0	0	0	0.418	0.732	0.257	0.244	Up in Male	DVL3	XENTRSegment polarity protein dishevelled homolog DVL-3 OS=Xenopus tropicalis OX=8364 GN=dvl3 PE=2 SV=1
TRINITY_DN1135_c0_g1_i2	8.89226	5.41275	12.5014	0.000406643	0.0383194	0	0	0	0	0	0	0.086	2.78	Up in Male	SCRIB	DANREProtein scribble homolog OS=Danio rerio OX=7955 GN=scrib PE=1 SV=1
TRINITY_DN22971_c0_g1_i4	8.91076	5.42779	21.7007	3.18679e-06	0.00130417	0	0	0	0	2.785	4.851	4.153	39.104	Up in Male	LYAM3	MOUSEP-selectin OS=Mus musculus OX=10090 GN=Selp PE=1 SV=1
TRINITY_DN74662_c0_g1_i1	8.94733	5.46042	15.3448	8.95665e-05	0.0157412	0	0	0	0	6.656	0.124	0	2.462	Up in Male	UGDH1	SOYBNUDP-glucose 6-dehydrogenase 1 OS=Glycine max OX=3847 GN=UGD1 PE=2 SV=1
TRINITY_DN383_c0_g1_i156	8.98842	5.4996	17.8459	2.3953e-05	0.00638322	0	0	0	0	0	0.447	0.077	0.722	Up in Male	VIGLN	HUMANVigilin OS=Homo sapiens OX=9606 GN=HDLBP PE=1 SV=2
TRINITY_DN6_c1_g1_i19	8.99906	5.51091	13.5602	0.000231031	0.0275765	0	0	0	0	0.77	0	0	1.326	Up in Male	NOM1	HUMANNucleolar MIF4G domain-containing protein 1 OS=Homo sapiens OX=9606 GN=NOM1 PE=1 SV=1
TRINITY_DN319_c0_g1_i18	9.03099	5.54065	22.1841	2.47712e-06	0.0010652	0	0	0	0	0.167	0.78	0.308	3.778	Up in Male	RECK	HUMANReversion-inducing cysteine-rich protein with Kazal motifs OS=Homo sapiens OX=9606 GN=RECK PE=1 SV=1
TRINITY_DN1458_c0_g1_i38	9.04647	5.55684	19.3628	1.0809e-05	0.00344052	0	0	0	0	0.733	0	1.978	1.475	Up in Male	SR140	PONABU2 snRNP-associated SURP motif-containing protein OS=Pongo abelii OX=9601 GN=U2SURP PE=2 SV=1
TRINITY_DN1221_c1_g1_i18	9.04798	5.556	28.1996	1.09428e-07	8.70775e-05	0	0	0	0	0.724	1.474	0.848	1.602	Up in Male	PLK1	XENTRSerine/threonine-protein kinase PLK1 OS=Xenopus tropicalis OX=8364 GN=plk1 PE=2 SV=1
TRINITY_DN58_c0_g1_i7	9.05556	5.56449	19.711	9.00822e-06	0.0030384	0	0	0	0	1.309	0	1.19	0.944	Up in Male	RN213	MOUSEE3 ubiquitin-protein ligase RNF213 OS=Mus musculus OX=10090 GN=Rnf213 PE=1 SV=2
TRINITY_DN5309_c0_g1_i102	9.08771	5.5927	23.6866	1.13367e-06	0.000590476	0	0	0	0	0.111	1.779	0.197	1.167	Up in Male	LRRC9	MOUSELeucine-rich repeat-containing protein 9 OS=Mus musculus OX=10090 GN=Lrrc9 PE=1 SV=2
TRINITY_DN387_c0_g1_i50	9.18602	5.6886	19.2714	1.13393e-05	0.00349287	0	0	0	0	0.835	0	1.43	0.202	Up in Male	PTPRS	CHICKReceptor-type tyrosine-protein phosphatase S OS=Gallus gallus OX=9031 GN=PTPRS PE=1 SV=3
TRINITY_DN561_c0_g1_i15	9.19155	5.69335	17.6835	2.60874e-05	0.00673267	0	0	0	0	0	0.618	0.274	4.924	Up in Male	PROM1	MOUSEProminin-1 OS=Mus musculus OX=10090 GN=Prom1 PE=1 SV=1
TRINITY_DN5537_c0_g1_i2	9.28502	5.7797	19.6871	9.12145e-06	0.0030384	0	0	0	0	1.569	1.645	0	1.793	Up in Male	SMCA4	BOVINTranscription activator BRG1 OS=Bos taurus OX=9913 GN=SMARCA4 PE=2 SV=1
TRINITY_DN965_c0_g1_i6	9.2866	5.78056	19.4745	1.01951e-05	0.00331884	0	0	0	0	0.074	0.19	0	0.117	Up in Male	FGFR3	DANREFibroblast growth factor receptor 3 OS=Danio rerio OX=7955 GN=fgfr3 PE=2 SV=1
TRINITY_DN1276_c0_g1_i10	9.29612	5.78991	19.7957	8.61744e-06	0.00297426	0	0	0	0	0.353	1.132	0.497	0	Up in Male	MICA1	DANRE
TRINITY_DN509_c0_g1_i11	9.31056	5.80819	15.1506	9.92687e-05	0.0164379	0	0	0	0	0	0	1.233	2.473	Up in Male	NOG2	MOUSENucleolar GTP-binding protein 2 OS=Mus musculus OX=10090 GN=Gnl2 PE=1 SV=2
TRINITY_DN340_c0_g1_i25	9.31375	5.8114	15.204	9.64992e-05	0.016309	0	0	0	0	0	0	1.053	1.539	Up in Male	NUD19	CHICKNucleoside diphosphate-linked moiety X motif 19 OS=Gallus gallus OX=9031 GN=NUDT19 PE=2 SV=1
TRINITY_DN4132_c0_g2_i8	9.33482	5.82842	19.6875	9.1194e-06	0.0030384	0	0	0	0	0	1.227	0.291	2.685	Up in Male	NEMF	MOUSENuclear export mediator factor Nemf OS=Mus musculus OX=10090 GN=Nemf PE=1 SV=2
TRINITY_DN89428_c0_g1_i1	9.33836	5.8313	17.8371	2.40649e-05	0.00638322	0	0	0	0	3.917	0.162	0	2.218	Up in Male	YMF40	MARPOUncharacterized mitochondrial protein ymf40 OS=Marchantia polymorpha OX=3197 GN=YMF40 PE=4 SV=1
TRINITY_DN22971_c0_g1_i2	9.42342	5.91381	23.9502	9.88617e-07	0.000534357	0	0	0	0	0.39	0.409	1.156	8.903	Up in Male	LYAM3	MOUSEP-selectin OS=Mus musculus OX=10090 GN=Selp PE=1 SV=1
TRINITY_DN2491_c0_g1_i19	9.46221	5.95072	20.1049	7.33093e-06	0.00272739	0	0	0	0	0	1.198	0.522	5.041	Up in Male	WIPI4	HUMANWD repeat domain phosphoinositide-interacting protein 4 OS=Homo sapiens OX=9606 GN=WDR45 PE=1 SV=1
TRINITY_DN2277_c0_g1_i7	9.49543	5.98181	33.4071	7.47491e-09	8.92224e-06	0	0	0	0	1.086	1.198	1.036	0.446	Up in Male	FKB15	MOUSEFK506-binding protein 15 OS=Mus musculus OX=10090 GN=Fkbp15 PE=1 SV=2
TRINITY_DN623_c0_g1_i15	9.69492	6.17358	30.0231	4.26929e-08	3.82195e-05	0	0	0	0	0.956	2.996	1.087	10.177	Up in Male	FCGBP	HUMANIgGFc-binding protein OS=Homo sapiens OX=9606 GN=FCGBP PE=1 SV=3
TRINITY_DN575_c0_g1_i14	9.70715	6.18786	16.6566	4.47953e-05	0.010166	0	0	0	0	0	0	2.44	2.77	Up in Male	HMCN2	HUMANHemicentin-2 OS=Homo sapiens OX=9606 GN=HMCN2 PE=2 SV=3
TRINITY_DN5215_c0_g1_i24	9.75179	6.22843	29.6871	5.07726e-08	4.15567e-05	0	0	0	0	0.743	4.337	1.678	13.318	Up in Male	LYAM3	MOUSEP-selectin OS=Mus musculus OX=10090 GN=Selp PE=1 SV=1
TRINITY_DN2442_c0_g1_i12	9.75816	10.1393	50.6455	1.1065e-12	6.33957e-09	0.306	0	0.276	0.2	37.64	110.771	73.789	587.741	Up in Male	TPPP2	MOUSETubulin polymerization-promoting protein family member 2 OS=Mus musculus OX=10090 GN=Tppp2 PE=2 SV=1
TRINITY_DN28351_c0_g1_i1	9.80525	6.2796	16.2435	5.56991e-05	0.0115412	0	0	0	0	4.576	0	0	2.059	Up in Male	GUNA	BACPUEndoglucanase A OS=Bacillus pumilus OX=1408 GN=eglA PE=1 SV=1
TRINITY_DN623_c0_g1_i28	9.80794	6.28268	29.8279	4.7216e-08	3.97823e-05	0	0	0	0	0.492	3.3	1.558	11.047	Up in Male	FCGBP	HUMANIgGFc-binding protein OS=Homo sapiens OX=9606 GN=FCGBP PE=1 SV=3
TRINITY_DN1237_c0_g1_i90	9.81254	6.28925	16.9374	3.86333e-05	0.00907153	0	0	0	0	0	0	0.779	1.263	Up in Male	37500	DROMESeptin-2 OS=Drosophila melanogaster OX=7227 GN=Sep2 PE=2 SV=2
TRINITY_DN4440_c1_g1_i11	9.83352	6.30807	15.7508	7.22591e-05	0.0132693	0	0	0	0	0	1.065	0	5.9	Up in Male	TTLL3	DANRETubulin monoglycylase TTLL3 OS=Danio rerio OX=7955 GN=ttll3 PE=2 SV=1
TRINITY_DN3099_c0_g1_i9	9.92869	6.40199	17.1628	3.43096e-05	0.00819056	0	0	0	0	0	0	3.322	1.348	Up in Male	ZN609	HUMANZinc finger protein 609 OS=Homo sapiens OX=9606 GN=ZNF609 PE=1 SV=2
TRINITY_DN965_c0_g1_i10	9.96136	6.43049	22.3049	2.32607e-06	0.00104117	0	0	0	0	0.39	0.067	0	0.149	Up in Male	FGFR3	DANREFibroblast growth factor receptor 3 OS=Danio rerio OX=7955 GN=fgfr3 PE=2 SV=1
TRINITY_DN1551_c0_g1_i3	9.96728	6.43636	23.262	1.41363e-06	0.000663874	0	0	0	0	3.026	1.55	0	2.961	Up in Male	ITA2	DROMEIntegrin alpha-PS2 OS=Drosophila melanogaster OX=7227 GN=if PE=1 SV=2
TRINITY_DN1497_c0_g1_i8	9.96856	6.43781	31.4831	2.01184e-08	2.13457e-05	0	0	0	0	0.176	3.063	0.454	2.589	Up in Male	GSTT1	HUMANGlutathione S-transferase theta-1 OS=Homo sapiens OX=9606 GN=GSTT1 PE=1 SV=4
TRINITY_DN392_c0_g1_i16	9.97596	6.44712	17.4104	3.01172e-05	0.00731159	0	0	0	0	0	0	1.224	2.568	Up in Male	PDCD4	RATProgrammed cell death protein 4 OS=Rattus norvegicus OX=10116 GN=Pdcd4 PE=1 SV=2
TRINITY_DN2726_c0_g1_i6	9.98182	6.45178	25.1179	5.39309e-07	0.000315298	0	0	0	0	1.736	0	3.356	2.165	Up in Male	STT3B	HUMANDolichyl-diphosphooligosaccharide--protein glycosyltransferase subunit STT3B OS=Homo sapiens OX=9606 GN=STT3B PE=1 SV=1
TRINITY_DN762_c1_g1_i9	10.1202	6.58513	24.3279	8.12556e-07	0.00044764	0	0	0	0	0.408	1.151	1.182	0	Up in Male	DUOX1	HUMANDual oxidase 1 OS=Homo sapiens OX=9606 GN=DUOX1 PE=1 SV=1
TRINITY_DN1588_c0_g1_i3	10.1713	6.63619	16.4621	4.96324e-05	0.010532	0	0	0	0	0.984	0	0	12.766	Up in Male	SAXO1	HUMANStabilizer of axonemal microtubules 1 OS=Homo sapiens OX=9606 GN=SAXO1 PE=1 SV=2
TRINITY_DN552_c1_g1_i11	10.1769	6.64157	16.9815	3.77457e-05	0.00893638	0	0	0	0	0.176	0	0	1.953	Up in Male	DYH10	HUMANDynein heavy chain 10, axonemal OS=Homo sapiens OX=9606 GN=DNAH10 PE=1 SV=4
TRINITY_DN319_c0_g1_i15	10.2679	11.1085	55.5818	8.96488e-14	8.56056e-10	0.044	0	0.052	0.061	12.058	22.923	25.001	170.615	Up in Male	LYAM3	MOUSEP-selectin OS=Mus musculus OX=10090 GN=Selp PE=1 SV=1
TRINITY_DN1112_c0_g1_i27	10.283	6.74343	24.4868	7.48222e-07	0.000420281	0	0	0	0	0.891	2.54	0	3.205	Up in Male	TTC38	DANRETetratricopeptide repeat protein 38 OS=Danio rerio OX=7955 GN=ttc38 PE=3 SV=1
TRINITY_DN13291_c0_g1_i2	10.4058	6.8638	18.1968	1.99211e-05	0.00543505	0	0	0	0	0	3.881	4.17	0	Up in Male	KAT6B	MACFAHistone acetyltransferase KAT6B OS=Macaca fascicularis OX=9541 GN=KAT6B PE=2 SV=1
TRINITY_DN1001_c0_g1_i33	10.4151	6.87298	32.392	1.26006e-08	1.38834e-05	0	0	0	0	0.241	1.731	0.848	9.264	Up in Male	TMC3	CHICKTransmembrane channel-like protein 3 OS=Gallus gallus OX=9031 GN=Tmc3 PE=2 SV=1
TRINITY_DN1836_c0_g1_i2	10.4563	6.9132	46.9348	7.33895e-12	2.62799e-08	0	0	0	0	19.53	12.47	11.884	9.105	Up in Male	PRDX6	PIGPeroxiredoxin-6 OS=Sus scrofa OX=9823 GN=PRDX6 PE=2 SV=3
TRINITY_DN911_c0_g1_i10	10.5282	6.98389	25.5191	4.38025e-07	0.000272785	0	0	0	0	0	2.045	1.216	10.155	Up in Male	KIF23	MOUSEKinesin-like protein KIF23 OS=Mus musculus OX=10090 GN=Kif23 PE=1 SV=1
TRINITY_DN57623_c0_g1_i24	10.542	7.02987	26.5345	2.5888e-07	0.000176575	0	0	0	0	0	1.626	2.337	8.022	Up in Male	TET5A	HUMANTerminal nucleotidyltransferase 5A OS=Homo sapiens OX=9606 GN=TENT5A PE=1 SV=2
TRINITY_DN1508_c0_g1_i25	10.6039	7.05769	37.6511	8.45987e-10	1.51469e-06	0	0	0	0	0.158	1.617	2.004	4.85	Up in Male	UBP7	HUMANUbiquitin carboxyl-terminal hydrolase 7 OS=Homo sapiens OX=9606 GN=USP7 PE=1 SV=2
TRINITY_DN2042_c0_g1_i1	10.6184	8.77276	48.2687	3.71646e-12	1.52093e-08	0	0	0.035	0	2.989	17.301	7.774	48.114	Up in Male	NCKX	DROMESodium/potassium/calcium exchanger Nckx30C OS=Drosophila melanogaster OX=7227 GN=Nckx30C PE=2 SV=4
TRINITY_DN2819_c0_g1_i5	10.7073	7.15936	30.3571	3.59397e-08	3.43188e-05	0	0	0	0	1.077	4.252	0.959	44.569	Up in Male	KAD1	BOVINAdenylate kinase isoenzyme 1 OS=Bos taurus OX=9913 GN=AK1 PE=1 SV=2
TRINITY_DN10674_c0_g2_i1	10.7515	7.20253	34.9153	3.4436e-09	5.19204e-06	0	0	0	0	1.68	4.889	2.2	37.969	Up in Male	TSSK2	MOUSETestis-specific serine/threonine-protein kinase 2 OS=Mus musculus OX=10090 GN=Tssk2 PE=1 SV=2
TRINITY_DN127_c0_g1_i18	10.7613	7.21225	49.3907	2.09735e-12	1.00138e-08	0	0	0	0	0.418	1.531	0.668	0.785	Up in Male	DYHC	HELCRDynein beta chain, ciliary OS=Heliocidaris crassispina OX=1043166 PE=1 SV=1
TRINITY_DN9454_c0_g1_i1	10.7646	7.21551	34.2586	4.82533e-09	6.58244e-06	0	0	0	0	1.921	5.536	2.885	50.703	Up in Male	MELK	XENTRMaternal embryonic leucine zipper kinase OS=Xenopus tropicalis OX=8364 GN=melk PE=2 SV=1
TRINITY_DN11184_c0_g1_i1	10.7655	7.21546	17.5632	2.77919e-05	0.00686341	0	0	0	0	18.342	0.105	0	0.021	Up in Male	RDRP	CPMV1RNA-directed RNA polymerase OS=Cryphonectria parasitica mitovirus 1 (strain American chestnut tree/New Jersey/NB631) OX=186769 PE=3 SV=1
TRINITY_DN1932_c0_g1_i4	10.8597	7.30886	37.2842	1.0211e-09	1.72068e-06	0	0	0	0	0.232	2.102	1.781	9.848	Up in Male	SL9C1	MOUSESodium/hydrogen exchanger 10 OS=Mus musculus OX=10090 GN=Slc9c1 PE=1 SV=3
TRINITY_DN2350_c0_g3_i1	10.8882	7.33681	19.3075	1.11266e-05	0.00346459	0	0	0	0	8.419	0	0	6.165	Up in Male	RBL	BRYMARibulose bisphosphate carboxylase large chain OS=Bryopsis maxima OX=3129 GN=rbcL PE=3 SV=1
TRINITY_DN335_c0_g1_i33	11.0968	7.54215	46.5306	9.01986e-12	2.87102e-08	0	0	0	0	0.381	1.332	1.087	4.043	Up in Male	MK14	XENLAMitogen-activated protein kinase 14 OS=Xenopus laevis OX=8355 GN=mapk14 PE=2 SV=1
TRINITY_DN29814_c0_g1_i2	11.1148	7.55995	41.4632	1.20108e-10	2.86729e-07	0	0	0	0	1.086	3.947	1.961	18.093	Up in Male	SGMR1	DANRESigma non-opioid intracellular receptor 1 OS=Danio rerio OX=7955 GN=sigmar1 PE=2 SV=1
TRINITY_DN444_c0_g2_i2	11.1786	7.62288	30.4744	3.38297e-08	3.34179e-05	0	0	0	0	0	1.693	0.95	2.027	Up in Male	DYH5	HUMANDynein heavy chain 5, axonemal OS=Homo sapiens OX=9606 GN=DNAH5 PE=1 SV=3
TRINITY_DN1237_c0_g1_i55	11.223	7.66738	18.5334	1.66955e-05	0.00473542	0	0	0	0	0	0	0.12	5.571	Up in Male	37500	DROMESeptin-2 OS=Drosophila melanogaster OX=7227 GN=Sep2 PE=2 SV=2
TRINITY_DN375_c0_g1_i9	11.5139	7.95428	40.3839	2.08657e-10	3.98492e-07	0	0	0	0	0.149	2.112	1.387	9.062	Up in Male	HAP2	NEMVEHapless 2 OS=Nematostella vectensis OX=45351 GN=HAP2 PE=1 SV=1
TRINITY_DN39693_c0_g1_i1	13.2417	9.6712	56.4115	5.87866e-14	8.4203e-10	0	0	0	0	7.844	30.047	13.306	142.908	Up in Male	KCRB	CHICKCreatine kinase B-type OS=Gallus gallus OX=9031 GN=CKB PE=1 SV=1
TRINITY_DN319_c0_g1_i1	14.1458	10.5732	63.3902	1.69562e-15	4.85745e-11	0	0	0	0	7.445	18.348	14.676	128.731	Up in Male	RECK	HUMANReversion-inducing cysteine-rich protein with Kazal motifs OS=Homo sapiens OX=9606 GN=RECK PE=1 SV=1

## Sheet: DE_May_MALvsFEM_Met
						Females with oocytes and embryos				Males with sperm
Transcript_ID	logFC	logCPM	LR	PValue	FDR	Hp_46	Hp_48	Hp_52	Hp_53	Hp_47	Hp_50	Hp_55	Hp_56	Condition	BLAST_ID	BLAST_descriptioin
TRINITY_DN356_c0_g1_i38	-11.7489	8.1173	22.3007	2.33124e-06	0.000986641	34.23	0	0	44.546	0	0	0	0	Up in Females	H10	XENTRHistone H1.0 OS=Xenopus tropicalis OX=8364 GN=h1-0 PE=2 SV=1
TRINITY_DN6325_c0_g1_i3	-11.7121	8.07985	45.5448	1.49187e-11	2.7962e-08	145.229	6.443	162.856	355.49	0	0	0	0	Up in Females	EDSP	CYNPYEpidermal differentiation-specific protein OS=Cynops pyrrhogaster OX=8330 PE=2 SV=1
TRINITY_DN7028_c0_g1_i6	-11.0351	7.41029	50.8422	1.001e-12	3.75233e-09	44.032	18.12	69.441	109.614	0	0	0	0	Up in Females	EDSP	CYNPYEpidermal differentiation-specific protein OS=Cynops pyrrhogaster OX=8330 PE=2 SV=1
TRINITY_DN1269_c0_g1_i45	-10.7369	7.11714	31.0187	2.55556e-08	2.16316e-05	2.32	1.182	0	3.921	0	0	0	0	Up in Females	RGS	DROMERegulator of G-protein signaling loco OS=Drosophila melanogaster OX=7227 GN=loco PE=1 SV=2
TRINITY_DN53_c0_g1_i7	-10.7183	7.10118	20.7791	5.15421e-06	0.00187842	23.139	49.024	0	0	0	0	0	0	Up in Females	TRAF4	MOUSETNF receptor-associated factor 4 OS=Mus musculus OX=10090 GN=Traf4 PE=1 SV=2
TRINITY_DN1472_c0_g1_i4	-10.4987	12.4074	76.8748	1.82146e-18	4.7795e-14	179.654	48.217	510.101	733.349	0.319	0.114	0.528	0.043	Up in Females	JAL9	ARATHJacalin-related lectin 9 OS=Arabidopsis thaliana OX=3702 GN=JAL9 PE=3 SV=1
TRINITY_DN6325_c0_g1_i4	-10.4143	8.84674	46.7363	8.12099e-12	1.77579e-08	237.274	22.181	726.601	187.781	0.639	0	0	0	Up in Females	EDSP	CYNPYEpidermal differentiation-specific protein OS=Cynops pyrrhogaster OX=8330 PE=2 SV=1
TRINITY_DN1472_c0_g1_i13	-10.4094	9.58802	48.6053	3.13023e-12	9.79029e-09	68.832	4.971	25.986	90.817	0.128	0	0	0	Up in Females	LECA	CASCRAgglutinin OS=Castanea crenata OX=103480 PE=1 SV=1
TRINITY_DN4085_c0_g1_i28	-10.3749	6.76555	17.5272	2.83226e-05	0.00692153	14.284	0	0	0.694	0	0	0	0	Up in Females	NFE2	MOUSETranscription factor NF-E2 45 kDa subunit OS=Mus musculus OX=10090 GN=Nfe2 PE=1 SV=1
TRINITY_DN2053_c0_g1_i1	-10.1572	6.54818	39.7489	2.88805e-10	4.45779e-07	0.863	0.581	1.001	0.204	0	0	0	0	Up in Females	NU205	HUMANNuclear pore complex protein Nup205 OS=Homo sapiens OX=9606 GN=NUP205 PE=1 SV=3
TRINITY_DN226_c0_g1_i41	-10.1382	6.53443	19.2249	1.1619e-05	0.00350441	2.534	3.114	0	0	0	0	0	0	Up in Females	JAK1	HUMANTyrosine-protein kinase JAK1 OS=Homo sapiens OX=9606 GN=JAK1 PE=1 SV=2
TRINITY_DN1472_c0_g1_i5	-10.12	9.87917	61.4571	4.52498e-15	3.95785e-11	104.427	81.672	242.097	874.849	0.456	0.285	0.274	0.065	Up in Females	GOS9	ORYSIProtein GOS9 OS=Oryza sativa subsp. indica OX=39946 GN=GOS9 PE=2 SV=1
TRINITY_DN1472_c0_g1_i1	-9.99676	9.03001	46.0276	1.16598e-11	2.35349e-08	164.358	7.25	141.093	378.401	0.128	0	0.377	0.065	Up in Females	GOS9	ORYSIProtein GOS9 OS=Oryza sativa subsp. indica OX=39946 GN=GOS9 PE=2 SV=1
TRINITY_DN798_c0_g1_i36	-9.92018	6.32159	17.9373	2.28299e-05	0.00599057	0.891	0	0	0.51	0	0	0	0	Up in Females	HUWE1	HUMANE3 ubiquitin-protein ligase HUWE1 OS=Homo sapiens OX=9606 GN=HUWE1 PE=1 SV=3
TRINITY_DN1228_c0_g1_i10	-9.79384	6.19402	24.6119	7.01158e-07	0.000399965	2.59	1.913	4.504	0	0	0	0	0	Up in Females	HMCN1	HUMANHemicentin-1 OS=Homo sapiens OX=9606 GN=HMCN1 PE=1 SV=2
TRINITY_DN387_c0_g1_i10	-9.77366	6.17522	29.8143	4.75473e-08	3.78073e-05	0.065	0.197	0.272	1.623	0	0	0	0	Up in Females	PTPRS	CHICKReceptor-type tyrosine-protein phosphatase S OS=Gallus gallus OX=9031 GN=PTPRS PE=1 SV=3
TRINITY_DN508_c1_g1_i15	-9.70268	6.1054	23.7891	1.07488e-06	0.000553036	1.866	0.882	3.092	0	0	0	0	0	Up in Females	PLPL9	MOUSE85/88 kDa calcium-independent phospholipase A2 OS=Mus musculus OX=10090 GN=Pla2g6 PE=1 SV=3
TRINITY_DN7028_c0_g1_i9	-9.67073	6.06816	20.4448	6.13747e-06	0.0021473	13.96	0	82.543	4.85	0	0	0	0	Up in Females	EDSP	CYNPYEpidermal differentiation-specific protein OS=Cynops pyrrhogaster OX=8330 PE=2 SV=1
TRINITY_DN6325_c0_g1_i1	-9.65706	6.06806	18.5686	1.63899e-05	0.00459449	117.143	0	6.214	6.565	0	0	0	0	Up in Females	EDSP	CYNPYEpidermal differentiation-specific protein OS=Cynops pyrrhogaster OX=8330 PE=2 SV=1
TRINITY_DN376_c7_g1_i28	-9.64993	6.05921	15.9224	6.5992e-05	0.0131283	26.759	0	8.749	0	0	0	0	0	Up in Females	EDSP	CYNPYEpidermal differentiation-specific protein OS=Cynops pyrrhogaster OX=8330 PE=2 SV=1
TRINITY_DN14682_c0_g1_i1	-9.49815	5.91462	17.8801	2.35272e-05	0.00611242	67.681	0	9.339	1.817	0	0	0	0	Up in Females	LEC	PARPCMannose/glucose-specific lectin (Fragment) OS=Parkia platycephala OX=185447 PE=1 SV=1
TRINITY_DN5076_c0_g1_i33	-9.3654	5.77985	20.0435	7.57014e-06	0.00245398	1.931	0	2.514	0.531	0	0	0	0	Up in Females	FIMB	DICDIFimbrin OS=Dictyostelium discoideum OX=44689 GN=fimA PE=2 SV=2
TRINITY_DN1618_c0_g1_i18	-9.35513	5.75674	14.3587	0.000151082	0.0240266	0	0	4.58	0.909	0	0	0	0	Up in Females	WSDU1	DANREWD repeat, SAM and U-box domain-containing protein 1 OS=Danio rerio OX=7955 GN=wdsub1 PE=2 SV=1
TRINITY_DN1337_c0_g1_i25	-9.24329	5.66061	20.7887	5.12839e-06	0.00187842	0.195	0.263	0.851	0	0	0	0	0	Up in Females	MACF1	RATMicrotubule-actin cross-linking factor 1 OS=Rattus norvegicus OX=10116 GN=Macf1 PE=1 SV=1
TRINITY_DN1472_c0_g1_i3	-9.1731	8.20421	28.0715	1.16914e-07	8.2006e-05	65.695	0.122	35.757	12.732	0.036	0	0.151	0	Up in Females	JAL9	ARATHJacalin-related lectin 9 OS=Arabidopsis thaliana OX=3702 GN=JAL9 PE=3 SV=1
TRINITY_DN479_c0_g1_i85	-9.0557	5.49233	14.7853	0.00012047	0.0198814	0.52	0	0	0.582	0	0	0	0	Up in Females	GTPB1	RATGTP-binding protein 1 OS=Rattus norvegicus OX=10116 GN=Gtpbp1 PE=1 SV=1
TRINITY_DN301_c0_g1_i41	-8.9781	5.86028	20.9849	4.62914e-06	0.00176042	0.743	0.657	2.367	0	0	0	0	0	Up in Females	PARP4	MOUSEProtein mono-ADP-ribosyltransferase PARP4 OS=Mus musculus OX=10090 GN=Parp4 PE=1 SV=1
TRINITY_DN2185_c0_g1_i23	-8.97179	5.41524	13.2618	0.000270875	0.0366379	0	1.079	0.13	0	0	0	0	0	Up in Females	MPRI	BOVINCation-independent mannose-6-phosphate receptor OS=Bos taurus OX=9913 GN=IGF2R PE=1 SV=2
TRINITY_DN1552_c0_g1_i29	-8.91398	5.36207	15.8991	6.681e-05	0.0131812	1.569	0.019	0	0.143	0	0	0	0	Up in Females	GCH1	HUMANGTP cyclohydrolase 1 OS=Homo sapiens OX=9606 GN=GCH1 PE=1 SV=1
TRINITY_DN1_c0_g1_i5	-8.90953	5.42257	18.352	1.83625e-05	0.00491664	0	0.319	0.411	0.153	0	0	0	0	Up in Females	DYH1	HUMANDynein heavy chain 1, axonemal OS=Homo sapiens OX=9606 GN=DNAH1 PE=1 SV=5
TRINITY_DN7028_c0_g1_i11	-8.90306	5.32937	16.804	4.14449e-05	0.00937513	8.947	0	47.632	2.736	0	0	0	0	Up in Females	EDSP	CYNPYEpidermal differentiation-specific protein OS=Cynops pyrrhogaster OX=8330 PE=2 SV=1
TRINITY_DN53_c0_g1_i12	-8.85382	5.30011	18.8149	1.44037e-05	0.00424287	0.761	1.097	0.482	0	0	0	0	0	Up in Females	USP9X	MOUSEProbable ubiquitin carboxyl-terminal hydrolase FAF-X OS=Mus musculus OX=10090 GN=Usp9x PE=1 SV=2
TRINITY_DN1653_c0_g1_i152	-8.84638	5.92103	22.148	2.52422e-06	0.00103493	4.39	7.194	0	2.726	0	0	0.009	0	Up in Females	THSD4	HUMANThrombospondin type-1 domain-containing protein 4 OS=Homo sapiens OX=9606 GN=THSD4 PE=2 SV=2
TRINITY_DN2164_c0_g1_i12	-8.7106	5.16147	25.2392	5.06427e-07	0.000302015	0.863	0.535	0.93	0.327	0	0	0	0	Up in Females	LRP4	RATLow-density lipoprotein receptor-related protein 4 OS=Rattus norvegicus OX=10116 GN=Lrp4 PE=1 SV=2
TRINITY_DN8000_c0_g1_i55	-8.69349	5.14209	17.338	3.12862e-05	0.00739593	0	0.638	0.901	1.072	0	0	0	0	Up in Females	PCY1A	HUMANCholine-phosphate cytidylyltransferase A OS=Homo sapiens OX=9606 GN=PCYT1A PE=1 SV=2
TRINITY_DN823_c0_g1_i16	-8.68169	5.14695	13.7625	0.000207431	0.0302389	2.645	0.797	0	0	0	0	0	0	Up in Females	RN213	MOUSEE3 ubiquitin-protein ligase RNF213 OS=Mus musculus OX=10090 GN=Rnf213 PE=1 SV=2
TRINITY_DN3530_c0_g1_i16	-8.67153	5.12782	18.0608	2.13961e-05	0.00567105	0.325	0.572	0.365	0	0	0	0	0	Up in Females	DGLB	HUMANSn1-specific diacylglycerol lipase beta OS=Homo sapiens OX=9606 GN=DAGLB PE=1 SV=2
TRINITY_DN1989_c0_g1_i1	-8.63186	5.09716	13.1651	0.000285215	0.037995	0	2.401	0	1.041	0	0	0	0	Up in Females	SORCN	HUMANSorcin OS=Homo sapiens OX=9606 GN=SRI PE=1 SV=1
TRINITY_DN7028_c0_g1_i18	-8.61193	5.04134	13.1228	0.00029173	0.0380553	0.529	0	50.799	0.745	0	0	0	0	Up in Females	EDSP	CYNPYEpidermal differentiation-specific protein OS=Cynops pyrrhogaster OX=8330 PE=2 SV=1
TRINITY_DN1607_c0_g1_i15	-8.58429	5.03983	18.5606	1.64589e-05	0.00459449	0.139	3.714	4.458	0.174	0	0	0	0	Up in Females	SAP	HUMANProsaposin OS=Homo sapiens OX=9606 GN=PSAP PE=1 SV=2
TRINITY_DN4740_c0_g1_i5	-8.58063	5.03446	15.4991	8.25464e-05	0.0151577	8.353	0	12.679	0.888	0	0	0	0	Up in Females	LEC	PARPCMannose/glucose-specific lectin (Fragment) OS=Parkia platycephala OX=185447 PE=1 SV=1
TRINITY_DN2850_c0_g1_i1	-8.48813	4.95565	17.1211	3.50704e-05	0.00813403	0.566	0.45	0.612	0	0	0	0	0	Up in Females	EGFR	APIMEEpidermal growth factor receptor OS=Apis mellifera OX=7460 GN=Egfr PE=2 SV=1
TRINITY_DN13995_c0_g1_i9	-8.47865	4.94653	17.3695	3.07719e-05	0.0073405	148.32	1.219	87.365	24.606	0	0	0	0	Up in Females	GOS9	ORYSIProtein GOS9 OS=Oryza sativa subsp. indica OX=39946 GN=GOS9 PE=2 SV=1
TRINITY_DN530_c0_g1_i13	-8.47676	4.93792	15.9879	6.375e-05	0.0129674	4.789	0	8.233	2.379	0	0	0	0	Up in Females	LBP	MOUSELipopolysaccharide binding protein OS=Mus musculus GN=LBP
TRINITY_DN603_c0_g1_i12	-8.39853	4.88616	13.0422	0.000304545	0.0393658	0.501	0.347	0	0	0	0	0	0	Up in Females	RNF41	XENLAE3 ubiquitin-protein ligase NRDP1 OS=Xenopus laevis OX=8355 GN=rnf41 PE=2 SV=1
TRINITY_DN2277_c0_g1_i6	-8.25686	4.75729	12.5629	0.000393487	0.0465094	0.501	0.647	0	0	0	0	0	0	Up in Females	FKB15	MOUSEFK506-binding protein 15 OS=Mus musculus OX=10090 GN=Fkbp15 PE=1 SV=2
TRINITY_DN1922_c0_g1_i20	-8.23224	4.79696	14.9802	0.000108648	0.0182751	0.213	0	0.947	0.235	0	0	0	0	Up in Females	LRK1	CAEELLeucine-rich repeat serine/threonine-protein kinase 1 OS=Caenorhabditis elegans OX=6239 GN=lrk-1 PE=1 SV=6
TRINITY_DN48997_c0_g1_i4	-8.18795	4.65107	13.476	0.000241638	0.0333715	4.669	4.164	95.85	0	0	0	0	0	Up in Females	EDSP	CYNPYEpidermal differentiation-specific protein OS=Cynops pyrrhogaster OX=8330 PE=2 SV=1
TRINITY_DN13000_c0_g1_i3	-8.14919	4.62726	13.1553	0.0002867	0.037995	0.473	0	22.152	20.042	0	0	0	0	Up in Females	TBA	ENTDOTubulin alpha chain OS=Enteroctopus dofleini OX=267067 PE=2 SV=1
TRINITY_DN1414_c0_g1_i75	-8.12487	4.6177	20.4114	6.24577e-06	0.00215275	0.093	0.131	0.507	0.327	0	0	0	0	Up in Females	ODB2	MOUSELipoamide acyltransferase component of branched-chain alpha-keto acid dehydrogenase complex, mitochondrial OS=Mus musculus OX=10090 GN=Dbt PE=1 SV=2
TRINITY_DN518_c0_g1_i1	-8.05113	4.55228	16.5843	4.65339e-05	0.0102881	0.037	0.169	0.427	1.756	0	0	0	0	Up in Females	EPHA1	HUMANEphrin type-A receptor 1 OS=Homo sapiens OX=9606 GN=EPHA1 PE=1 SV=4
TRINITY_DN530_c0_g1_i22	-8.00546	4.50741	12.797	0.000347174	0.0433803	8.799	0	11.472	0.398	0	0	0	0	Up in Females	LBP	RENRELuciferin-binding protein OS=Renilla reniformis OX=6136 PE=1 SV=1
TRINITY_DN6361_c0_g1_i3	-7.93816	4.45126	13.889	0.000193929	0.0284284	1.058	0	1.295	3.226	0	0	0	0	Up in Females	TC159	ARATHTranslocase of chloroplast 159, chloroplastic OS=Arabidopsis thaliana OX=3702 GN=TOC159 PE=1 SV=1
TRINITY_DN3820_c0_g1_i3	-7.92336	4.43767	19.6455	9.32215e-06	0.00284434	0.325	0.234	0.813	0.388	0	0	0	0	Up in Females	S35F5	MACFASolute carrier family 35 member F5 OS=Macaca fascicularis OX=9541 GN=SLC35F5 PE=2 SV=1
TRINITY_DN3911_c0_g3_i6	-7.84395	4.35968	13.7401	0.000209928	0.0304338	0.807	0	2.439	2.093	0	0	0	0	Up in Females	TOC34	PEATranslocase of chloroplast 34 OS=Pisum sativum OX=3888 GN=TOC34 PE=1 SV=1
TRINITY_DN44_c4_g1_i5	-7.75385	4.28811	16.5634	4.70493e-05	0.0102881	0.817	0.066	1.001	1.338	0	0	0	0	Up in Females	GPMI	CAEEL2,3-bisphosphoglycerate-independent phosphoglycerate mutase OS=Caenorhabditis elegans OX=6239 GN=ipgm-1 PE=1 SV=1
TRINITY_DN2158_c0_g1_i5	-7.7369	4.27588	18.8869	1.387e-05	0.00413579	0.381	0.628	0.549	0.766	0	0	0	0	Up in Females	EXO1	DANREExonuclease 1 OS=Danio rerio OX=7955 GN=exo1 PE=2 SV=1
TRINITY_DN727_c0_g1_i16	-7.7264	4.27543	12.656	0.000374366	0.0451185	4.372	0	0.993	1.531	0	0	0	0	Up in Females	EPDR1	RATMammalian ependymin-related protein 1 OS=Rattus norvegicus OX=10116 GN=Epdr1 PE=1 SV=1
TRINITY_DN2129_c0_g1_i6	-7.69304	4.54483	13.6803	0.000216716	0.0310744	0	0.328	0.742	0.408	0	0	0	0	Up in Females	RMD3	BOVINRegulator of microtubule dynamics protein 3 OS=Bos taurus OX=9913 GN=RMDN3 PE=2 SV=1
TRINITY_DN52_c0_g1_i227	-7.62261	4.91231	20.3896	6.31713e-06	0.00215275	0.111	0.103	0.494	0.286	0	0	0	0	Up in Females	TORSO	BOMMOTyrosine-protein kinase receptor torso OS=Bombyx mori OX=7091 GN=tor PE=1 SV=1
TRINITY_DN765_c0_g1_i58	-7.52343	4.08254	13.2434	0.000273538	0.0368084	0.111	0.075	0.243	0	0	0	0	0	Up in Females	S39A9	CHICKZinc transporter ZIP9 OS=Gallus gallus OX=9031 GN=SLC39A9 PE=2 SV=1
TRINITY_DN92_c1_g1_i2	-7.51175	4.08886	13.9599	0.000186753	0.0278432	0.278	0.722	0	0.725	0	0	0	0	Up in Females	RIF1	CHICKTelomere-associated protein RIF1 OS=Gallus gallus OX=9031 GN=RIF1 PE=3 SV=3
TRINITY_DN21820_c0_g1_i10	-7.45431	4.0224	13.0207	0.000308061	0.0396251	1.429	1.172	3.331	0	0	0	0	0	Up in Females	GEFX	DICDIRasGEF domain-containing serine/threonine-protein kinase X OS=Dictyostelium discoideum OX=44689 GN=gefX PE=2 SV=1
TRINITY_DN11418_c0_g1_i1	-7.41772	4.0123	12.5196	0.000402702	0.0473852	7.982	0.103	1.161	0.756	0	0	0	0	Up in Females	PO2F1	CHICKPOU domain, class 2, transcription factor 1 OS=Gallus gallus OX=9031 GN=POU2F1 PE=2 SV=1
TRINITY_DN4903_c0_g1_i56	-7.36155	3.94422	15.921	6.60418e-05	0.0131283	0.278	0.113	0.98	0.725	0	0	0	0	Up in Females	KPBA	DROMEProbable phosphorylase b kinase regulatory subunit alpha OS=Drosophila melanogaster OX=7227 GN=CG7766 PE=1 SV=2
TRINITY_DN530_c0_g1_i15	-7.34494	3.91432	13.554	0.000231799	0.0325263	1.16	0.141	9.05	1.736	0	0	0	0	Up in Females	LBP	RENRELuciferin-binding protein OS=Renilla reniformis OX=6136 PE=1 SV=1
TRINITY_DN1591_c0_g3_i2	-7.3419	5.88137	14.2811	0.000157437	0.0247374	1.16	0	2.078	9.853	0	0	0.066	0	Up in Females	GTPA	DICDIGTP-binding protein A OS=Dictyostelium discoideum OX=44689 GN=gtpA PE=3 SV=1
TRINITY_DN2064_c0_g1_i15	-7.13826	3.75824	15.6253	7.72142e-05	0.0148188	0.093	0.206	0.549	0.184	0	0	0	0	Up in Females	FRM4B	MOUSEFERM domain-containing protein 4B OS=Mus musculus OX=10090 GN=Frmd4b PE=1 SV=2
TRINITY_DN11139_c0_g1_i3	-7.08908	3.72535	15.8155	6.98293e-05	0.013674	0.306	0.216	0.222	0.378	0	0	0	0	Up in Females	VATL	TORMAV-type proton ATPase 16 kDa proteolipid subunit OS=Torpedo marmorata OX=7788 PE=1 SV=1
TRINITY_DN3462_c0_g1_i4	-7.08504	3.72742	12.5004	0.000406859	0.0476606	0.362	0.563	0	1.552	0	0	0	0	Up in Females	PWP2	HUMANPeriodic tryptophan protein 2 homolog OS=Homo sapiens OX=9606 GN=PWP2 PE=2 SV=2
TRINITY_DN7049_c0_g1_i4	-6.9768	3.63275	14.9043	0.000113102	0.0189032	0.408	0.169	0.339	0.725	0	0	0	0	Up in Females	MYG1	BOVINUPF0160 protein MYG1, mitochondrial OS=Bos taurus OX=9913 PE=2 SV=1
TRINITY_DN37_c0_g1_i4	-6.96259	3.63295	12.4449	0.000419137	0.04845	0.65	0.478	0	0.592	0	0	0	0	Up in Females	TRI45	BOVINTripartite motif-containing protein 45 OS=Bos taurus OX=9913 GN=TRIM45 PE=2 SV=1
TRINITY_DN530_c0_g1_i16	-6.91822	6.56126	13.5066	0.000237722	0.0330044	18.257	2.354	15.729	0	0	0.333	0	0	Up in Females	WC11	BOVINAntigen WC1.1 OS=Bos taurus OX=9913 PE=2 SV=1
TRINITY_DN27225_c0_g1_i4	-6.91788	3.58499	15.4809	8.33414e-05	0.0151577	0.473	0.441	0.57	0.5	0	0	0	0	Up in Females	LBP	RENRELuciferin-binding protein OS=Renilla reniformis OX=6136 PE=1 SV=1
TRINITY_DN530_c0_g1_i18	-6.68858	4.94058	14.1336	0.000170278	0.0261292	7.564	0.91	7.865	0.531	0	0.152	0	0	Up in Females	RING2	HUMANE3 ubiquitin-protein ligase RING2 OS=Homo sapiens OX=9606 GN=RNF2 PE=1 SV=1
TRINITY_DN7_c0_g1_i16	-6.54594	6.93139	13.6035	0.000225766	0.0320221	9.903	0.31	0.985	0.235	0.146	0	0	0	Up in Females	LBP	RENRELuciferin-binding protein OS=Renilla reniformis OX=6136 PE=1 SV=1
TRINITY_DN4460_c0_g1_i69	-6.52658	5.19803	15.6215	7.73697e-05	0.0148188	0.678	0.206	0.964	0.071	0.018	0	0	0	Up in Females	TAPT1	CHICKTransmembrane anterior posterior transformation protein 1 homolog OS=Gallus gallus OX=9031 GN=TAPT1 PE=2 SV=2
TRINITY_DN484_c0_g1_i31	-6.48081	3.24461	13.128	0.000290913	0.0380553	0.548	0.628	1.01	0.194	0	0	0	0	Up in Females	NELL2	DANREProtein kinase C-binding protein NELL2 OS=Danio rerio OX=7955 GN=nell2 PE=2 SV=1
TRINITY_DN11205_c0_g1_i51	-6.41106	7.62884	13.1617	0.000285737	0.037995	5.096	0.291	26.711	0.643	0	0	0	0.281	Up in Females	SACS	HUMANSacsin OS=Homo sapiens OX=9606 GN=SACS PE=1 SV=2
TRINITY_DN702_c0_g1_i10	-5.69008	7.14403	15.5655	7.96961e-05	0.0150448	1.058	1.369	1.571	0.807	0.1	0	0	0	Up in Females	PABP1	MOUSEPolyadenylate-binding protein 1 OS=Mus musculus OX=10090 GN=Pabpc1 PE=1 SV=2
TRINITY_DN1292_c0_g1_i12	-5.40952	5.44107	12.3704	0.000436194	0.0493351	0.167	0.516	1.14	0.725	0	0	0	0.043	Up in Females	RECQ1	RATATP-dependent DNA helicase Q1 OS=Rattus norvegicus OX=10116 GN=Recql PE=1 SV=1
TRINITY_DN530_c0_g1_i21	-5.01806	6.72991	17.5161	2.8488e-05	0.00692153	5.226	1.013	11.363	14.886	0.073	0.628	0.066	0.205	Up in Females	KI20B	HUMANKinesin-like protein KIF20B OS=Homo sapiens OX=9606 GN=KIF20B PE=1 SV=3
TRINITY_DN13517_c0_g1_i3	-4.71985	7.86667	17.1066	3.53384e-05	0.00813403	6.544	0.553	14.083	22.186	0.821	0.19	0.557	0.097	Up in Females	LBP	RENRELuciferin-binding protein OS=Renilla reniformis OX=6136 PE=1 SV=1
TRINITY_DN7586_c0_g1_i6	2.53565	11.1652	12.5843	0.000389006	0.0463978	8.261	8.45	7.735	9.189	17.228	85.668	56.89	47.751	Up in Males	PAO6	ORYSJPolyamine oxidase 6 OS=Oryza sativa subsp. japonica OX=39947 GN=PAO6 PE=2 SV=1
TRINITY_DN1466_c2_g1_i3	3.68608	6.57125	12.9174	0.00032554	0.0412665	0.102	0.084	0.197	0.082	0.328	2.139	1.755	1.773	Up in Males	TBB4B	BOVINTubulin beta-4B chain OS=Bos taurus OX=9913 GN=TUBB4B PE=2 SV=1
TRINITY_DN7637_c0_g1_i3	3.76566	6.90332	12.6619	0.000373187	0.0451185	0.26	0.075	0.151	0.694	1.013	4.992	6.999	3.989	Up in Males	TTLL4	HUMANTubulin polyglutamylase TTLL4 OS=Homo sapiens OX=9606 GN=TTLL4 PE=1 SV=2
TRINITY_DN6884_c0_g1_i24	3.9307	8.06024	15.0824	0.000102916	0.0177126	0.241	0.506	0.256	0.858	0.703	8.633	11.593	8.746	Up in Males	LCA5	HUMANLebercilin OS=Homo sapiens OX=9606 GN=LCA5 PE=1 SV=2
TRINITY_DN1045_c0_g1_i3	4.10512	7.86582	15.6235	7.72881e-05	0.0148188	0.046	0.066	0	0.163	0.447	1.217	1.632	1.87	Up in Males	SPAG1	MOUSESperm-associated antigen 1 OS=Mus musculus OX=10090 GN=Spag1 PE=1 SV=1
TRINITY_DN6884_c0_g1_i44	4.13436	8.00233	17.591	2.73876e-05	0.00677973	0.473	0.619	0.511	0.163	1.423	11.885	12.272	8.562	Up in Males	HYDIN	HUMANHydrocephalus-inducing protein homolog OS=Homo sapiens OX=9606 GN=HYDIN PE=1 SV=3
TRINITY_DN7775_c0_g1_i32	4.4997	6.22638	12.7046	0.000364765	0.0451185	0.111	0.075	0.155	0	0.192	3.927	2.141	1.978	Up in Males	SPAG1	HUMANSperm-associated antigen 1 OS=Homo sapiens OX=9606 GN=SPAG1 PE=1 SV=3
TRINITY_DN9617_c0_g1_i1	4.53109	6.52068	15.4715	8.37599e-05	0.0151577	0.13	0.084	0	0.163	0.42	3.737	3.877	2.476	Up in Males	TM128	MOUSETransmembrane protein 128 OS=Mus musculus OX=10090 GN=Tmem128 PE=1 SV=2
TRINITY_DN2467_c0_g2_i3	4.77994	7.83335	23.9052	1.01196e-06	0.000531074	0.093	0.113	0.084	0.163	0.94	5.886	3.037	3.762	Up in Males	GTPB3	DANREtRNA modification GTPase GTPBP3, mitochondrial OS=Danio rerio OX=7955 GN=gtpbp3 PE=2 SV=1
TRINITY_DN1_c0_g1_i52	4.82029	9.54525	22.996	1.62338e-06	0.000734441	0.13	0.103	0	0.163	1.423	5.325	3.5	2.951	Up in Males	FTCD	DICDIFormimidoyltransferase-cyclodeaminase OS=Dictyostelium discoideum OX=44689 GN=ftcd PE=3 SV=1
TRINITY_DN2282_c0_g1_i10	4.8401	6.89376	18.7742	1.47142e-05	0.00424287	0.046	0.141	0	0.133	0.593	3.461	3.801	3.059	Up in Males	DYH1	HUMANDynein heavy chain 1, axonemal OS=Homo sapiens OX=9606 GN=DNAH1 PE=1 SV=5
TRINITY_DN12444_c0_g1_i2	4.90451	8.94662	23.4066	1.31129e-06	0.000629896	0.696	0.403	0.142	0.398	2.272	22.306	13.98	18.26	Up in Males	PDE5	CAEELProbable 3',5'-cyclic phosphodiesterase pde-5 OS=Caenorhabditis elegans OX=6239 GN=pde-5 PE=3 SV=3
TRINITY_DN4802_c0_g1_i6	4.97707	8.53436	24.1124	9.08728e-07	0.000491675	1.578	1.566	7.001	1.828	15.604	142.432	79.661	107.795	Up in Males	MYLIP	RATE3 ubiquitin-protein ligase MYLIP OS=Rattus norvegicus OX=10116 GN=Mylip PE=2 SV=1
TRINITY_DN623_c0_g1_i15	5.44762	5.52797	15.0448	0.000104991	0.0177739	0.046	0.019	0	0.082	0.255	3.09	1.764	2.941	Up in Males	TBA	LYTPITubulin alpha chain (Fragment) OS=Lytechinus pictus OX=7653 PE=3 SV=1
TRINITY_DN7775_c0_g1_i17	5.55505	5.96916	16.4012	5.12516e-05	0.0109337	0.111	0.094	0	0.031	0.265	6.019	5.358	4.973	Up in Males	FCGBP	HUMANIgGFc-binding protein OS=Homo sapiens OX=9606 GN=FCGBP PE=1 SV=3
TRINITY_DN444_c0_g2_i1	5.63178	10.2462	38.3273	5.98192e-10	8.72031e-07	0.111	0.103	0.113	0.174	1.506	11.381	5.575	7.027	Up in Males	TM128	MOUSETransmembrane protein 128 OS=Mus musculus OX=10090 GN=Tmem128 PE=1 SV=2
TRINITY_DN4081_c0_g1_i11	5.83214	4.82214	12.6966	0.000366321	0.0451185	0.046	0	0	0	0.274	2.149	1.066	1.816	Up in Males	DYH5	HUMANDynein heavy chain 5, axonemal OS=Homo sapiens OX=9606 GN=DNAH5 PE=1 SV=3
TRINITY_DN561_c0_g1_i33	6.05634	6.0183	13.7293	0.00021113	0.0304398	0	0.066	0	0	0.073	1.284	1.047	3.773	Up in Males	TRAF5	HUMANTNF receptor-associated factor 5 OS=Homo sapiens OX=9606 GN=TRAF5 PE=1 SV=2
TRINITY_DN5247_c0_g1_i1	6.06441	6.97887	22.6942	1.89941e-06	0.000838495	0.019	0.019	0.088	0.143	0.502	7.977	6.141	2.238	Up in Males	PROM1	MOUSEProminin-1 OS=Mus musculus OX=10090 GN=Prom1 PE=1 SV=1
TRINITY_DN279_c1_g1_i1	6.15425	5.23409	13.4143	0.000249719	0.0341283	0.009	0	0	0	0.018	0.723	0.415	0.508	Up in Males	F227B	MACFAProtein FAM227B OS=Macaca fascicularis OX=9541 GN=FAM227B PE=2 SV=1
TRINITY_DN3560_c0_g1_i93	6.20748	6.16707	12.3725	0.000435713	0.0493351	0	0	0	0.031	0	0.647	0.887	0.735	Up in Males	SPG17	HUMANSperm-associated antigen 17 OS=Homo sapiens OX=9606 GN=SPAG17 PE=2 SV=1
TRINITY_DN2652_c0_g1_i1	6.24502	5.96661	16.5314	4.78502e-05	0.0103768	0	0	0	0.153	0.547	2.757	5.556	2.595	Up in Males	NU188	HUMANNucleoporin NUP188 homolog OS=Homo sapiens OX=9606 GN=NUP188 PE=1 SV=1
TRINITY_DN5215_c0_g1_i24	6.31258	5.49263	15.0758	0.000103279	0.0177126	0.065	0	0	0	0.164	3.499	3.585	3.016	Up in Males	FOXN4	DANREForkhead box protein N4 OS=Danio rerio OX=7955 GN=foxn4 PE=1 SV=1
TRINITY_DN279_c1_g1_i10	6.45632	7.29127	20.0924	7.37905e-06	0.00245096	0.009	0	0	0.092	0.219	3.461	2.047	3.027	Up in Males	LYAM3	MOUSEP-selectin OS=Mus musculus OX=10090 GN=Selp PE=1 SV=1
TRINITY_DN375_c0_g1_i16	6.62857	5.19136	18.362	1.82661e-05	0.00491664	0	0.009	0	0	0.338	0.409	0.613	0.27	Up in Males	SPG17	HUMANSperm-associated antigen 17 OS=Homo sapiens OX=9606 GN=SPAG17 PE=2 SV=1
TRINITY_DN1288_c0_g1_i1	6.76309	3.49846	12.5632	0.000393408	0.0465094	0	0	0	0	0.155	0.618	0.17	0.357	Up in Males	HAP2	NEMVEHapless 2 OS=Nematostella vectensis OX=45351 GN=HAP2 PE=1 SV=1
TRINITY_DN6796_c0_g1_i17	6.76994	3.50537	12.6582	0.000373922	0.0451185	0	0	0	0	0.283	0.086	0.075	0.097	Up in Males	PAR12	HUMANProtein mono-ADP-ribosyltransferase PARP12 OS=Homo sapiens OX=9606 GN=PARP12 PE=1 SV=1
TRINITY_DN52334_c0_g1_i1	6.8382	6.48864	24.0926	9.18143e-07	0.000491675	0.176	0	0	0.174	2.4	23.789	14.838	16.616	Up in Males	TFP11	PIGTuftelin-interacting protein 11 OS=Sus scrofa OX=9823 GN=TFIP11 PE=2 SV=1
TRINITY_DN442_c0_g1_i3	6.84659	3.56397	13.3318	0.000260939	0.0354769	0	0	0	0	0.1	0.285	0.151	0.195	Up in Males	PCR2	ARATHProtein PLANT CADMIUM RESISTANCE 2 OS=Arabidopsis thaliana OX=3702 GN=PCR2 PE=1 SV=1
TRINITY_DN1582_c0_g1_i76	6.92992	6.89797	14.73	0.000124059	0.0203456	0	0.038	0	0	1.67	2.291	0	2.173	Up in Males	PRP4B	HUMANSerine/threonine-protein kinase PRP4 homolog OS=Homo sapiens OX=9606 GN=PRPF4B PE=1 SV=3
TRINITY_DN8390_c0_g1_i3	6.9799	3.66906	13.1149	0.000292956	0.0380553	0	0	0	0	0.192	0.941	0.821	0.259	Up in Males	TRIPC	XENTRE3 ubiquitin-protein ligase TRIP12 OS=Xenopus tropicalis OX=8364 GN=trip12 PE=2 SV=1
TRINITY_DN2819_c0_g1_i5	6.99328	6.9714	20.8474	4.97378e-06	0.00186446	0	0	0.557	0	1.378	14.994	12.97	9.6	Up in Males	UN13B	DROMEProtein unc-13 homolog 4B OS=Drosophila melanogaster OX=7227 GN=stac PE=1 SV=5
TRINITY_DN914_c0_g1_i25	7.01561	3.69841	12.7254	0.000360729	0.0448604	0	0	0	0	0.082	0.57	1.038	0.519	Up in Males	KAD1	BOVINAdenylate kinase isoenzyme 1 OS=Bos taurus OX=9913 GN=AK1 PE=1 SV=2
TRINITY_DN2876_c0_g1_i98	7.02367	3.70466	14.2479	0.000160243	0.0250284	0	0	0	0	0.292	0.295	0.198	0.216	Up in Males	PR3CB	DANREProtein phosphatase 1 regulatory subunit 3C-B OS=Danio rerio OX=7955 GN=ppp1r3cb PE=2 SV=1
TRINITY_DN442_c0_g1_i1	7.03338	3.71242	13.9417	0.000188572	0.0279556	0	0	0	0	0.128	0.314	0.377	0.173	Up in Males	LR2BP	DANRELRP2-binding protein OS=Danio rerio OX=7955 GN=lrp2bp PE=2 SV=1
TRINITY_DN750_c2_g1_i36	7.11121	3.77482	13.9664	0.000186108	0.0278432	0	0	0	0	0.109	0.399	0.349	0.119	Up in Males	PRP4B	HUMANSerine/threonine-protein kinase PRP4 homolog OS=Homo sapiens OX=9606 GN=PRPF4B PE=1 SV=3
TRINITY_DN14380_c0_g1_i134	7.13292	3.79295	14.1633	0.000167606	0.0258705	0	0	0	0	0.201	0.124	0.047	0.097	Up in Males	TCB2	CAEBRTransposable element Tcb2 transposase OS=Caenorhabditis briggsae OX=6238 PE=3 SV=1
TRINITY_DN914_c0_g1_i24	7.19106	5.0599	12.6591	0.000373745	0.0451185	0.009	0	0	0	0	1.493	3.358	0.659	Up in Males	HS7C2	DICDIHeat shock cognate 70 kDa protein 2 OS=Dictyostelium discoideum OX=44689 GN=hspE-1 PE=1 SV=1
TRINITY_DN1238_c0_g2_i49	7.22013	3.86465	12.9519	0.000319605	0.0407109	0	0	0	0	0.173	0.352	0.689	0.032	Up in Males	PR3CB	DANREProtein phosphatase 1 regulatory subunit 3C-B OS=Danio rerio OX=7955 GN=ppp1r3cb PE=2 SV=1
TRINITY_DN875_c0_g1_i43	7.23576	3.87706	14.4825	0.000141469	0.0227738	0	0	0	0	0.401	0.266	0.113	0.227	Up in Males	NAS5	CAEELZinc metalloproteinase nas-5 OS=Caenorhabditis elegans OX=6239 GN=nas-5 PE=3 SV=2
TRINITY_DN321_c0_g1_i47	7.25319	5.24096	20.0187	7.66868e-06	0.00245398	0	0	0	0.01	0.301	0.628	0.575	0.627	Up in Males	DIAC	MOUSEDi-N-acetylchitobiase OS=Mus musculus OX=10090 GN=Ctbs PE=1 SV=2
TRINITY_DN608_c0_g1_i23	7.26449	3.90049	14.6306	0.000130774	0.0213137	0	0	0	0	0.319	1.036	0.943	0.789	Up in Males	GPTC3	MOUSEG patch domain-containing protein 3 OS=Mus musculus OX=10090 GN=Gpatch3 PE=2 SV=1
TRINITY_DN3454_c0_g1_i75	7.30451	3.93364	14.0194	0.000180935	0.0273654	0	0	0	0	0.219	0.628	0.424	1.265	Up in Males	SVEP1	HUMANSushi, von Willebrand factor type A, EGF and pentraxin domain-containing protein 1 OS=Homo sapiens OX=9606 GN=SVEP1 PE=1 SV=3
TRINITY_DN4102_c0_g1_i73	7.32118	3.94748	15.2228	9.55451e-05	0.0168262	0	0	0	0	0.292	0.361	0.189	0.162	Up in Males	DSE1	NICBEProtein DECREASED SIZE EXCLUSION LIMIT 1 OS=Nicotiana benthamiana OX=4100 GN=DSE1 PE=2 SV=1
TRINITY_DN863_c0_g1_i8	7.34161	3.96365	13.5744	0.000229287	0.0323467	0	0	0	0	0.091	1.017	0.406	1.005	Up in Males	WDR59	CHICKGATOR complex protein WDR59 OS=Gallus gallus OX=9031 GN=WDR59 PE=2 SV=1
TRINITY_DN1419_c1_g1_i2	7.37084	6.48021	23.2455	1.42583e-06	0.000656381	0	0	0	0.133	0.73	9.327	5.641	5.892	Up in Males	FINC	HUMANFibronectin OS=Homo sapiens OX=9606 GN=FN1 PE=1 SV=5
TRINITY_DN6982_c0_g1_i4	7.37523	6.52943	23.5725	1.20295e-06	0.000607028	0.019	0	0	0	0.137	2.054	2.585	2	Up in Males	SPAT1	MOUSESpermatogenesis-associated protein 1 OS=Mus musculus OX=10090 GN=Spata1 PE=2 SV=1
TRINITY_DN5299_c0_g1_i20	7.38551	4.00179	15.2882	9.22919e-05	0.0165873	0	0	0	0	0.265	0.143	0.189	0.303	Up in Males	WDR87	HUMANWD repeat-containing protein 87 OS=Homo sapiens OX=9606 GN=WDR87 PE=1 SV=3
TRINITY_DN3572_c0_g1_i29	7.41995	8.03157	13.443	0.000245919	0.0337848	0	0.084	0	0	0.128	0	12.451	5.762	Up in Males	WAKLA	ARATHWall-associated receptor kinase-like 1 OS=Arabidopsis thaliana OX=3702 GN=WAKL1 PE=2 SV=1
TRINITY_DN867_c0_g1_i37	7.42761	4.03661	15.2397	9.46926e-05	0.0168262	0	0	0	0	0.064	0.152	0.123	0.195	Up in Males	EF1A1	BOVINElongation factor 1-alpha 1 OS=Bos taurus OX=9913 GN=EEF1A1 PE=1 SV=1
TRINITY_DN7151_c0_g1_i8	7.42986	4.03817	14.5101	0.000139412	0.0225813	0	0	0	0	0.328	2.187	1.66	2.216	Up in Males	VAC14	CHICKProtein VAC14 homolog OS=Gallus gallus OX=9031 GN=VAC14 PE=2 SV=1
TRINITY_DN1969_c0_g1_i5	7.49078	4.08941	15.2056	9.64161e-05	0.0168664	0	0	0	0	0.438	1.131	0.707	0.173	Up in Males	PPR3C	BOVINProtein phosphatase 1 regulatory subunit 3C OS=Bos taurus OX=9913 GN=PPP1R3C PE=2 SV=1
TRINITY_DN7151_c0_g1_i5	7.49194	4.09013	15.0491	0.000104749	0.0177739	0	0	0	0	0.255	1.141	0.34	0.811	Up in Males	RFA1	XENLAReplication protein A 70 kDa DNA-binding subunit OS=Xenopus laevis OX=8355 GN=rpa1 PE=1 SV=1
TRINITY_DN1268_c1_g1_i25	7.53824	4.13003	15.9444	6.52305e-05	0.0131283	0	0	0	0	0.146	0.257	0.17	0.065	Up in Males	MED7	AEDAEMediator of RNA polymerase II transcription subunit 7 OS=Aedes aegypti OX=7159 GN=MED7 PE=3 SV=1
TRINITY_DN6241_c0_g1_i16	7.54127	4.13257	16.08	6.07235e-05	0.0126459	0	0	0	0	0.429	0.713	0.349	0.259	Up in Males	PRS10	HUMAN26S proteasome regulatory subunit 10B OS=Homo sapiens OX=9606 GN=PSMC6 PE=1 SV=1
TRINITY_DN260_c1_g1_i19	7.55402	4.14385	14.8124	0.000118751	0.0197217	0	0	0	0	0.657	0.618	0.585	0.054	Up in Males	NUBP2	NEMVECytosolic Fe-S cluster assembly factor NUBP2 homolog OS=Nematostella vectensis OX=45351 GN=v1g229988 PE=3 SV=1
TRINITY_DN14380_c0_g1_i57	7.57376	4.16075	16.0528	6.16002e-05	0.0127275	0	0	0	0	0.082	0.162	0.198	0.205	Up in Males	SUN1	MOUSESUN domain-containing protein 1 OS=Mus musculus OX=10090 GN=Sun1 PE=1 SV=2
TRINITY_DN5215_c0_g1_i11	7.6075	4.18753	13.9219	0.000190562	0.0280918	0	0	0	0	0.128	2.263	0.34	1.373	Up in Males	HS7C2	DICDIHeat shock cognate 70 kDa protein 2 OS=Dictyostelium discoideum OX=44689 GN=hspE-1 PE=1 SV=1
TRINITY_DN5576_c0_g1_i22	7.60965	4.19004	15.481	8.33377e-05	0.0151577	0	0	0	0	0.146	0.57	0.123	0.162	Up in Males	LYAM3	MOUSEP-selectin OS=Mus musculus OX=10090 GN=Selp PE=1 SV=1
TRINITY_DN22971_c0_g1_i2	7.63622	5.64486	21.546	3.45444e-06	0.00139453	0.019	0	0	0	0.319	2.738	1.905	2.8	Up in Males	SETX	HUMANProbable helicase senataxin OS=Homo sapiens OX=9606 GN=SETX PE=1 SV=4
TRINITY_DN2442_c0_g1_i12	7.63696	9.90432	45.3201	1.67323e-11	2.92703e-08	0.167	0.413	1.232	1.511	21.936	209.673	229.05	146.757	Up in Males	LYAM3	MOUSEP-selectin OS=Mus musculus OX=10090 GN=Selp PE=1 SV=1
TRINITY_DN1414_c0_g1_i37	7.67659	4.25108	12.4148	0.000425951	0.0487251	0	0	0	0	0.073	0	0.17	0.108	Up in Males	TPPP2	MOUSETubulin polymerization-promoting protein family member 2 OS=Mus musculus OX=10090 GN=Tppp2 PE=2 SV=1
TRINITY_DN2491_c0_g1_i3	7.67916	7.43459	27.2601	1.77846e-07	0.000116667	0.084	0	0	0	0.639	13.891	8.942	6.897	Up in Males	ODB2	MOUSELipoamide acyltransferase component of branched-chain alpha-keto acid dehydrogenase complex, mitochondrial OS=Mus musculus OX=10090 GN=Dbt PE=1 SV=2
TRINITY_DN1592_c0_g1_i36	7.72194	4.29001	12.6536	0.000374841	0.0451185	0	0	0	0	0.766	0	0.821	0.822	Up in Males	WIPI4	HUMANWD repeat domain phosphoinositide-interacting protein 4 OS=Homo sapiens OX=9606 GN=WDR45 PE=1 SV=1
TRINITY_DN27225_c0_g1_i10	7.75145	4.31422	16.5765	4.67261e-05	0.0102881	0	0	0	0	0.328	0.257	0.707	0.768	Up in Males	GGYF2	XENLAGRB10-interacting GYF protein 2 OS=Xenopus laevis OX=8355 GN=gigyf2 PE=2 SV=1
TRINITY_DN52_c0_g1_i250	7.83277	4.38372	16.8829	3.97574e-05	0.00907159	0	0	0	0	0.219	0.561	0.16	0.119	Up in Males	RING2	HUMANE3 ubiquitin-protein ligase RING2 OS=Homo sapiens OX=9606 GN=RNF2 PE=1 SV=1
TRINITY_DN1429_c0_g1_i18	7.85997	4.40701	12.645	0.000376564	0.0451189	0	0	0	0	0	0.818	0.424	0.714	Up in Males	FGFR	STRPUFibroblast growth factor receptor OS=Strongylocentrotus purpuratus OX=7668 GN=FGFR PE=2 SV=1
TRINITY_DN1731_c2_g1_i1	7.87859	4.45147	17.8298	2.41568e-05	0.00621445	0	0	0	0	0.328	0.789	0.811	0.476	Up in Males	VPS16	HUMANVacuolar protein sorting-associated protein 16 homolog OS=Homo sapiens OX=9606 GN=VPS16 PE=1 SV=2
TRINITY_DN2252_c1_g1_i1	7.91479	4.45759	12.4301	0.000422466	0.0486207	0	0	0	0	1.022	0.181	0	0.335	Up in Males	SPCS2	XENTRProbable signal peptidase complex subunit 2 OS=Xenopus tropicalis OX=8364 GN=spcs2 PE=2 SV=1
TRINITY_DN5309_c0_g1_i123	7.91503	4.45466	12.8006	0.000346513	0.0433803	0	0	0	0	0	0.742	0.264	0.357	Up in Males	DHX9	HUMANATP-dependent RNA helicase A OS=Homo sapiens OX=9606 GN=DHX9 PE=1 SV=4
TRINITY_DN3831_c0_g1_i3	7.91842	4.45876	12.8309	0.000340941	0.043011	0	0	0	0	0	0.523	0.509	0.162	Up in Males	LRRC9	MOUSELeucine-rich repeat-containing protein 9 OS=Mus musculus OX=10090 GN=Lrrc9 PE=1 SV=2
TRINITY_DN863_c0_g1_i5	7.93116	4.47045	15.2308	9.51407e-05	0.0168262	0	0	0	0	0.064	1.16	0.679	1.827	Up in Males	SYTC	BOVINThreonine--tRNA ligase 1, cytoplasmic OS=Bos taurus OX=9913 GN=TARS1 PE=2 SV=1
TRINITY_DN7900_c0_g1_i2	7.94348	4.481	13.1275	0.000290994	0.0380553	0	0	0	0	0	2.824	2.226	2.649	Up in Males	FINC	HUMANFibronectin OS=Homo sapiens OX=9606 GN=FN1 PE=1 SV=5
TRINITY_DN1233_c0_g1_i32	8.00184	4.53362	16.3565	5.24767e-05	0.0110939	0	0	0	0	0.046	0.162	0.226	0.541	Up in Males	NETR	RATNeurotrypsin OS=Rattus norvegicus OX=10116 GN=Prss12 PE=1 SV=1
TRINITY_DN1691_c0_g1_i3	8.03572	4.56067	12.4916	0.000408776	0.0476724	0	0	0	0	0	0.865	0.066	0.465	Up in Males	PRP16	HUMANPre-mRNA-splicing factor ATP-dependent RNA helicase PRP16 OS=Homo sapiens OX=9606 GN=DHX38 PE=1 SV=2
TRINITY_DN383_c0_g1_i14	8.05647	4.58427	13.5281	0.000235024	0.0328033	0	0	0	0	0.246	0	0.274	0.054	Up in Males	MCM3	BOVINDNA replication licensing factor MCM3 OS=Bos taurus OX=9913 GN=MCM3 PE=2 SV=1
TRINITY_DN127_c0_g1_i22	8.06096	10.2426	43.5325	4.16978e-11	6.83843e-08	0.019	0.028	0.05	0	0.73	12.817	5.15	7.416	Up in Males	VIGLN	HUMANVigilin OS=Homo sapiens OX=9606 GN=HDLBP PE=1 SV=2
TRINITY_DN2884_c0_g1_i70	8.08235	4.6009	12.4098	0.000427088	0.0487251	0	0	0	0	0	0.808	0.075	0.097	Up in Males	DYHC	HELCRDynein beta chain, ciliary OS=Heliocidaris crassispina OX=1043166 PE=1 SV=1
TRINITY_DN335_c0_g1_i33	8.10617	5.86659	25.4379	4.56845e-07	0.000281499	0	0	0.013	0	0.219	0.323	0.906	0.432	Up in Males	GLAK1	ARATHGlucuronokinase 1 OS=Arabidopsis thaliana OX=3702 GN=GLCAK1 PE=1 SV=1
TRINITY_DN1177_c0_g1_i11	8.11523	4.63429	18.7842	1.46375e-05	0.00424287	0	0	0	0	0.228	0.808	0.736	0.541	Up in Males	MK14	XENLAMitogen-activated protein kinase 14 OS=Xenopus laevis OX=8355 GN=mapk14 PE=2 SV=1
TRINITY_DN86_c0_g1_i7	8.11942	11.3171	46.8142	7.80473e-12	1.77579e-08	0.381	0.206	0.176	0	11.342	100.72	83.208	63.427	Up in Males	F184A	HUMANProtein FAM184A OS=Homo sapiens OX=9606 GN=FAM184A PE=2 SV=3
TRINITY_DN78703_c0_g1_i1	8.12955	4.64631	17.4455	2.95668e-05	0.00711774	0	0	0	0	0.319	3.927	1.707	1.492	Up in Males	TBA1D	BOVINTubulin alpha-1D chain OS=Bos taurus OX=9913 GN=TUBA1D PE=1 SV=1
TRINITY_DN3857_c0_g1_i31	8.18729	4.69795	17.6849	2.60692e-05	0.00657745	0	0	0	0	0.164	1.322	0.245	0.681	Up in Males	ZGLP1	HUMANGATA-type zinc finger protein 1 OS=Homo sapiens OX=9606 GN=ZGLP1 PE=2 SV=1
TRINITY_DN109_c0_g1_i15	8.27127	4.77663	14.4304	0.000145436	0.0232698	0	0	0	0	0.484	0	1.141	0.314	Up in Males	IFT80	HUMANIntraflagellar transport protein 80 homolog OS=Homo sapiens OX=9606 GN=IFT80 PE=1 SV=3
TRINITY_DN2042_c0_g1_i2	8.33278	4.83048	19.9336	8.01797e-06	0.00253484	0	0	0	0	0.383	0.856	0.981	1.557	Up in Males	LMNA	XENLALamin-A OS=Xenopus laevis OX=8355 GN=lmna PE=2 SV=1
TRINITY_DN267_c0_g1_i31	8.33782	4.83495	14.0139	0.000181463	0.0273654	0	0	0	0	0.173	0.124	0	0.476	Up in Males	NCKX	DROMESodium/potassium/calcium exchanger Nckx30C OS=Drosophila melanogaster OX=7227 GN=Nckx30C PE=2 SV=4
TRINITY_DN1950_c0_g1_i1	8.35265	4.84853	21.0032	4.58507e-06	0.00176042	0	0	0	0	0.885	1.673	2.113	1.2	Up in Males	DGKD	HUMANDiacylglycerol kinase delta OS=Homo sapiens OX=9606 GN=DGKD PE=1 SV=4
TRINITY_DN2064_c1_g1_i32	8.35995	4.85495	20.6134	5.62013e-06	0.00202017	0	0	0	0	0.575	0.666	0.208	0.411	Up in Males	RAB9A	HUMANRas-related protein Rab-9A OS=Homo sapiens OX=9606 GN=RAB9A PE=1 SV=1
TRINITY_DN5309_c0_g1_i119	8.37407	4.86829	20.3602	6.41499e-06	0.00215807	0	0	0	0	0.21	0.247	0.783	0.422	Up in Males	XDH	CHICKXanthine dehydrogenase/oxidase OS=Gallus gallus OX=9031 GN=XDH PE=1 SV=1
TRINITY_DN372_c0_g1_i2	8.43433	4.92242	19.8319	8.45587e-06	0.00264145	0	0	0	0	0.338	0.932	0.557	0.097	Up in Males	LRRC9	MOUSELeucine-rich repeat-containing protein 9 OS=Mus musculus OX=10090 GN=Lrrc9 PE=1 SV=2
TRINITY_DN1419_c0_g1_i18	8.43595	4.92408	20.0289	7.62803e-06	0.00245398	0	0	0	0	0.155	1.046	0.906	0.465	Up in Males	PTPRS	CHICKReceptor-type tyrosine-protein phosphatase S OS=Gallus gallus OX=9031 GN=PTPRS PE=1 SV=3
TRINITY_DN319_c0_g1_i18	8.46233	4.94718	14.1946	0.000164845	0.0255949	0	0	0	0	0	1.131	0.208	1.362	Up in Males	Y9801	DROMEPP2C-like domain-containing protein CG9801 OS=Drosophila melanogaster OX=7227 GN=CG9801 PE=2 SV=1
TRINITY_DN4132_c0_g2_i8	8.4961	4.979	20.9903	4.61609e-06	0.00176042	0	0	0	0	0.392	0.998	0.481	0.184	Up in Males	RECK	HUMANReversion-inducing cysteine-rich protein with Kazal motifs OS=Homo sapiens OX=9606 GN=RECK PE=1 SV=1
TRINITY_DN1001_c0_g1_i9	8.58559	5.06056	15.5299	8.12116e-05	0.0151425	0	0	0	0	0	2.691	1.255	2.216	Up in Males	NEMF	MOUSENuclear export mediator factor Nemf OS=Mus musculus OX=10090 GN=Nemf PE=1 SV=2
TRINITY_DN9454_c0_g1_i1	8.59254	7.47093	34.4313	4.41574e-09	5.03778e-06	0.037	0	0	0.102	1.314	22.249	21.998	18.508	Up in Males	TMC3	CHICKTransmembrane channel-like protein 3 OS=Gallus gallus OX=9031 GN=Tmc3 PE=2 SV=1
TRINITY_DN2338_c0_g1_i10	8.59297	5.06836	22.6762	1.91729e-06	0.000838495	0	0	0	0	0.347	0.409	0.274	0.519	Up in Males	MELK	XENTRMaternal embryonic leucine zipper kinase OS=Xenopus tropicalis OX=8364 GN=melk PE=2 SV=1
TRINITY_DN2491_c0_g1_i7	8.62427	5.09613	18.5838	1.62599e-05	0.00459449	0	0	0	0	0.055	2.006	0.415	1.124	Up in Males	LIN54	PONABProtein lin-54 homolog OS=Pongo abelii OX=9601 GN=LIN54 PE=2 SV=1
TRINITY_DN5434_c0_g1_i13	8.68615	5.1534	19.7509	8.82192e-06	0.00272338	0	0	0	0	0.036	0.932	0.274	0.259	Up in Males	WIPI4	HUMANWD repeat domain phosphoinositide-interacting protein 4 OS=Homo sapiens OX=9606 GN=WDR45 PE=1 SV=1
TRINITY_DN6798_c0_g1_i25	8.68818	5.15592	16.0373	6.21078e-05	0.0127321	0	0	0	0	0.493	0.342	0	0.216	Up in Males	RCC1	XENLARegulator of chromosome condensation OS=Xenopus laevis OX=8355 GN=rcc1 PE=2 SV=1
TRINITY_DN623_c0_g1_i28	8.74701	5.21049	21.1948	4.14883e-06	0.00164947	0	0	0	0	0.201	2.643	1.688	2.032	Up in Males	PTPRQ	MOUSEPhosphatidylinositol phosphatase PTPRQ OS=Mus musculus OX=10090 GN=Ptprq PE=1 SV=1
TRINITY_DN186_c2_g1_i1	8.80836	5.26856	15.6059	7.80104e-05	0.0148333	0	0	0	0	1.013	0	0.123	1.557	Up in Males	FCGBP	HUMANIgGFc-binding protein OS=Homo sapiens OX=9606 GN=FCGBP PE=1 SV=3
TRINITY_DN1632_c0_g1_i244	8.81175	5.50713	25.4192	4.61298e-07	0.000281499	0	0	0	0	0.557	1.227	0.557	1.222	Up in Males	NAC1	BOVINSodium/calcium exchanger 1 OS=Bos taurus OX=9913 GN=SLC8A1 PE=1 SV=1
TRINITY_DN20234_c0_g1_i6	8.81391	5.27201	16.3431	5.28482e-05	0.0110939	0	0	0	0	0.849	2.396	0	2.054	Up in Males	WDR19	MOUSEWD repeat-containing protein 19 OS=Mus musculus OX=10090 GN=Wdr19 PE=1 SV=1
TRINITY_DN6408_c0_g1_i5	8.81714	5.27588	23.4234	1.29988e-06	0.000629896	0	0	0	0	0.137	0.704	0.5	0.303	Up in Males	RMI1	XENLARecQ-mediated genome instability protein 1 OS=Xenopus laevis OX=8355 GN=rmi1 PE=2 SV=1
TRINITY_DN1526_c0_g1_i7	8.82281	5.28118	16.7582	4.24589e-05	0.00952241	0	0	0	0	0	0.352	0.5	0.324	Up in Males	EXOS9	DANREExosome complex component RRP45 OS=Danio rerio OX=7955 GN=exosc9 PE=2 SV=1
TRINITY_DN962_c0_g1_i31	8.83136	5.2902	12.4566	0.000416523	0.048361	0	0	0	0	0.703	0	0	0.768	Up in Males	ZZEF1	HUMANZinc finger ZZ-type and EF-hand domain-containing protein 1 OS=Homo sapiens OX=9606 GN=ZZEF1 PE=1 SV=6
TRINITY_DN2764_c0_g1_i10	8.84135	5.29808	16.4798	4.91708e-05	0.0105758	0	0	0	0	0	0.713	0.377	1.135	Up in Males	DPYS	RATDihydropyrimidinase OS=Rattus norvegicus OX=10116 GN=Dpys PE=1 SV=2
TRINITY_DN5404_c1_g1_i30	8.84633	5.30314	22.1882	2.47186e-06	0.00102955	0	0	0	0	0.137	1.493	1.679	1.168	Up in Males	MOXD2	DANREDBH-like monooxygenase protein 2 homolog OS=Danio rerio OX=7955 GN=moxd2 PE=2 SV=2
TRINITY_DN12717_c0_g1_i1	8.91584	9.57033	48.4676	3.35795e-12	9.79029e-09	0	0.122	0	0.071	6.296	42.711	30.912	35.568	Up in Males	MOK	HUMANMAPK/MAK/MRK overlapping kinase OS=Homo sapiens OX=9606 GN=MOK PE=2 SV=1
TRINITY_DN561_c0_g1_i15	8.94031	5.39071	17.1356	3.4804e-05	0.00813403	0	0	0	0	0	1.236	0.906	1.805	Up in Males	LYAM2	HUMANE-selectin OS=Homo sapiens OX=9606 GN=SELE PE=1 SV=1
TRINITY_DN2410_c0_g1_i24	8.94684	5.3982	17.7664	2.49758e-05	0.00636277	0	0	0	0	0.429	0	0.236	0.184	Up in Males	PROM1	MOUSEProminin-1 OS=Mus musculus OX=10090 GN=Prom1 PE=1 SV=1
TRINITY_DN2049_c0_g1_i27	9.01226	5.4595	13.0031	0.000310982	0.0398057	0	0	0	0	0.958	0	0	0.789	Up in Males	PSB2	HUMANProteasome subunit beta type-2 OS=Homo sapiens OX=9606 GN=PSMB2 PE=1 SV=1
TRINITY_DN383_c0_g1_i11	9.11778	5.55883	18.4093	1.78185e-05	0.00491664	0	0	0	0	0.611	0	0.302	0.259	Up in Males	PTEN	CANLFPhosphatidylinositol 3,4,5-trisphosphate 3-phosphatase and dual-specificity protein phosphatase PTEN OS=Canis lupus familiaris OX=9615 GN=PTEN PE=2 SV=1
TRINITY_DN4058_c1_g1_i20	9.12294	5.56253	25.1508	5.30184e-07	0.000309156	0	0	0	0	0.292	1.569	0.415	0.508	Up in Males	VIGLN	HUMANVigilin OS=Homo sapiens OX=9606 GN=HDLBP PE=1 SV=2
TRINITY_DN319_c0_g1_i15	9.22604	10.4212	60.383	7.80831e-15	4.28707e-11	0.074	0.047	0	0.031	4.809	49.899	33.242	38.238	Up in Males	UBE3A	MOUSEUbiquitin-protein ligase E3A OS=Mus musculus OX=10090 GN=Ube3a PE=1 SV=2
TRINITY_DN2764_c0_g1_i8	9.23165	5.66381	14.0598	0.000177087	0.027016	0	0	0	0	0	1.265	0	0.703	Up in Males	LYAM3	MOUSEP-selectin OS=Mus musculus OX=10090 GN=Selp PE=1 SV=1
TRINITY_DN12717_c0_g1_i3	9.2641	5.69549	18.3813	1.80827e-05	0.00491664	0	0	0	0	0	6.532	1.651	4.411	Up in Males	PDE	NAJATVenom phosphodiesterase OS=Naja atra OX=8656 PE=1 SV=1
TRINITY_DN1508_c0_g1_i25	9.36744	5.79462	29.1116	6.83264e-08	5.27319e-05	0	0	0	0	0.319	0.913	0.896	0.973	Up in Males	SEZ6	XENLASeizure protein 6 homolog OS=Xenopus laevis OX=8355 GN=sez6 PE=2 SV=1
TRINITY_DN1233_c0_g1_i7	9.38003	5.8062	24.4946	7.45182e-07	0.000416034	0	0	0	0	0.046	1.654	0.783	0.562	Up in Males	UBP7	HUMANUbiquitin carboxyl-terminal hydrolase 7 OS=Homo sapiens OX=9606 GN=USP7 PE=1 SV=2
TRINITY_DN10674_c0_g2_i1	9.42245	7.43831	37.7196	8.16796e-10	1.07164e-06	0	0.028	0	0	1.296	17.333	15.347	14.4	Up in Males	PRP16	HUMANPre-mRNA-splicing factor ATP-dependent RNA helicase PRP16 OS=Homo sapiens OX=9606 GN=DHX38 PE=1 SV=2
TRINITY_DN5090_c0_g1_i6	9.43852	5.86285	14.3028	0.000155637	0.0246019	0	0	0	0	1.277	0	0	2.13	Up in Males	TSSK2	MOUSETestis-specific serine/threonine-protein kinase 2 OS=Mus musculus OX=10090 GN=Tssk2 PE=1 SV=2
TRINITY_DN4_c0_g1_i37	9.45522	5.87855	13.6548	0.000219684	0.0313288	0	0	0	0	0	0	0.481	5.092	Up in Males	MVP	STRPUMajor vault protein OS=Strongylocentrotus purpuratus OX=7668 GN=MVP PE=1 SV=1
TRINITY_DN914_c0_g1_i2	9.48065	5.9028	23.332	1.36313e-06	0.000638725	0	0	0	0	0.109	2.415	7.744	0.919	Up in Males	MPCP	PONABPhosphate carrier protein, mitochondrial OS=Pongo abelii OX=9601 GN=SLC25A3 PE=2 SV=1
TRINITY_DN4987_c0_g1_i13	9.53631	5.95583	31.8784	1.64132e-08	1.48511e-05	0	0	0	0	0.484	0.789	0.887	0.303	Up in Males	PR3CB	DANREProtein phosphatase 1 regulatory subunit 3C-B OS=Danio rerio OX=7955 GN=ppp1r3cb PE=2 SV=1
TRINITY_DN1001_c0_g1_i33	9.55375	5.97211	20.5043	5.94974e-06	0.00210975	0	0	0	0	0	2.244	1.604	1.719	Up in Males	DRC7	XENTRDynein regulatory complex subunit 7 OS=Xenopus tropicalis OX=8364 GN=drc7 PE=2 SV=1
TRINITY_DN22971_c0_g1_i6	9.55656	5.97516	27.9786	1.22663e-07	8.25302e-05	0	0	0	0	2.318	22.04	28.355	25.33	Up in Males	TMC3	CHICKTransmembrane channel-like protein 3 OS=Gallus gallus OX=9031 GN=Tmc3 PE=2 SV=1
TRINITY_DN444_c0_g2_i4	9.66219	6.07617	28.0412	1.18759e-07	8.2006e-05	0	0	0	0	0.073	0.979	0.208	0.162	Up in Males	LYAM3	MOUSEP-selectin OS=Mus musculus OX=10090 GN=Selp PE=1 SV=1
TRINITY_DN1821_c1_g1_i2	9.67607	6.09052	15.1347	0.000100107	0.0173961	0	0	0	0	3.723	0	0	1.514	Up in Males	DYH5	HUMANDynein heavy chain 5, axonemal OS=Homo sapiens OX=9606 GN=DNAH5 PE=1 SV=3
TRINITY_DN58209_c0_g1_i2	9.70901	9.18946	46.8428	7.69162e-12	1.77579e-08	0.037	0	0	0	2.226	27.83	15.121	21.135	Up in Males	PPM1A	MOUSEProtein phosphatase 1A OS=Mus musculus OX=10090 GN=Ppm1a PE=1 SV=1
TRINITY_DN1495_c0_g1_i3	9.72121	7.68577	22.5609	2.03588e-06	0.000875763	0.009	0.009	0	0	0.137	5.182	0.019	18.832	Up in Males	TEX14	BOVINInactive serine/threonine-protein kinase TEX14 OS=Bos taurus OX=9913 GN=TEX14 PE=3 SV=2
TRINITY_DN3007_c0_g1_i12	9.78745	6.19748	15.5262	8.1368e-05	0.0151425	0	0	0	0	0	0	1.358	2.043	Up in Males	RDRP	CPMV1RNA-directed RNA polymerase OS=Cryphonectria parasitica mitovirus 1 (strain American chestnut tree/New Jersey/NB631) OX=186769 PE=3 SV=1
TRINITY_DN3530_c0_g1_i32	9.7904	6.19966	28.4938	9.39983e-08	6.85143e-05	0	0	0	0	0.201	5.011	1.953	3.459	Up in Males	G3P	COTJAGlyceraldehyde-3-phosphate dehydrogenase OS=Coturnix japonica OX=93934 GN=GAPDH PE=2 SV=2
TRINITY_DN891_c1_g1_i11	9.87846	6.28478	32.6973	1.07687e-08	1.04656e-05	0	0	0	0	0.557	0.095	0.33	0.605	Up in Males	DGLB	HUMANSn1-specific diacylglycerol lipase beta OS=Homo sapiens OX=9606 GN=DAGLB PE=1 SV=2
TRINITY_DN319_c0_g1_i23	9.89766	6.30314	26.9081	2.13358e-07	0.000136549	0	0	0	0	0.109	2.51	0.651	3.968	Up in Males	UBR4	HUMANE3 ubiquitin-protein ligase UBR4 OS=Homo sapiens OX=9606 GN=UBR4 PE=1 SV=1
TRINITY_DN444_c0_g2_i2	9.90534	6.31073	32.4018	1.2537e-08	1.17489e-05	0	0	0	0	0.146	0.513	0.179	0.724	Up in Males	RECK	HUMANReversion-inducing cysteine-rich protein with Kazal motifs OS=Homo sapiens OX=9606 GN=RECK PE=1 SV=1
TRINITY_DN911_c0_g1_i10	9.95236	6.35601	28.996	7.25285e-08	5.43757e-05	0	0	0	0	0.1	3.746	1.481	2.216	Up in Males	DYH5	HUMANDynein heavy chain 5, axonemal OS=Homo sapiens OX=9606 GN=DNAH5 PE=1 SV=3
TRINITY_DN58264_c0_g1_i14	10.0219	6.4234	30.1135	4.07489e-08	3.34141e-05	0	0	0	0	2.555	55.461	48.853	10.714	Up in Males	KIF23	MOUSEKinesin-like protein KIF23 OS=Mus musculus OX=10090 GN=Kif23 PE=1 SV=1
TRINITY_DN1932_c0_g1_i1	10.0335	6.43478	33.9438	5.67279e-09	5.95416e-06	0	0	0	0	0.383	2.358	1.283	2.53	Up in Males	TBA3C	HUMANTubulin alpha-3C chain OS=Homo sapiens OX=9606 GN=TUBA3C PE=1 SV=1
TRINITY_DN34426_c0_g1_i19	10.0359	6.43714	34.3295	4.65266e-09	5.08691e-06	0	0	0	0	0.922	5.591	1.368	1.87	Up in Males	SL9C1	MOUSESodium/hydrogen exchanger 10 OS=Mus musculus OX=10090 GN=Slc9c1 PE=1 SV=3
TRINITY_DN61415_c0_g1_i1	10.0969	6.49625	33.4689	7.24114e-09	7.30798e-06	0	0	0	0	0.657	5.914	8.433	5.103	Up in Males	SHEP	DROGRProtein alan shepard OS=Drosophila grimshawi OX=7222 GN=shep PE=3 SV=1
TRINITY_DN2965_c0_g1_i17	10.0976	6.49699	37.5166	9.0639e-10	1.13256e-06	0	0	0	0	1.04	3.689	3.151	1.914	Up in Males	TSSK1	BOVINTestis-specific serine/threonine-protein kinase 1 OS=Bos taurus OX=9913 GN=TSSK1B PE=2 SV=1
TRINITY_DN2491_c0_g1_i19	10.1353	6.53339	31.1807	2.35094e-08	2.05629e-05	0	0	0	0	0.155	3.651	1.802	3.265	Up in Males	SAMTR	XENLAS-adenosylmethionine sensor upstream of mTORC1 OS=Xenopus laevis OX=8355 GN=bmt2 PE=2 SV=1
TRINITY_DN375_c0_g1_i9	10.1727	6.56946	23.3934	1.32028e-06	0.000629896	0	0	0	0	0	2.063	0.802	1.33	Up in Males	WIPI4	HUMANWD repeat domain phosphoinositide-interacting protein 4 OS=Homo sapiens OX=9606 GN=WDR45 PE=1 SV=1
TRINITY_DN11160_c0_g1_i1	10.4073	6.79829	35.6095	2.41111e-09	2.8758e-06	0	0	0	0	0.265	4.783	2.387	2.53	Up in Males	HAP2	NEMVEHapless 2 OS=Nematostella vectensis OX=45351 GN=HAP2 PE=1 SV=1
TRINITY_DN29814_c0_g1_i2	10.6155	7.00185	37.8463	7.65429e-10	1.0571e-06	0	0	0	0	0.411	6.684	4.084	3.849	Up in Males	WDY	DROGRWD repeat-containing protein on Y chromosome OS=Drosophila grimshawi OX=7222 GN=WDY PE=4 SV=1
TRINITY_DN2722_c0_g1_i10	10.8665	7.24858	17.6117	2.70912e-05	0.00677021	0	0	0	0	0	0	2.698	0.238	Up in Males	SGMR1	DANRESigma non-opioid intracellular receptor 1 OS=Danio rerio OX=7955 GN=sigmar1 PE=2 SV=1
TRINITY_DN2042_c0_g1_i1	11.689	8.05941	51.9624	5.65739e-13	2.47417e-09	0	0	0	0	1.934	15.146	11.989	11.784	Up in Males	FAT4	MOUSEProtocadherin Fat 4 OS=Mus musculus OX=10090 GN=Fat4 PE=1 SV=2
TRINITY_DN39693_c0_g1_i1	12.7893	9.15184	60.2942	8.16897e-15	4.28707e-11	0	0	0	0	3.568	46.324	32.015	36.443	Up in Males	NCKX	DROMESodium/potassium/calcium exchanger Nckx30C OS=Drosophila melanogaster OX=7227 GN=Nckx30C PE=2 SV=4
TRINITY_DN319_c0_g1_i1	13.6367	9.99615	70.2805	5.14432e-17	6.74935e-13	0	0	0	0	3.002	37.538	26.733	32.076	Up in Males	KCRB	CHICKCreatine kinase B-type OS=Gallus gallus OX=9031 GN=CKB PE=1 SV=1
															RECK	HUMANReversion-inducing cysteine-rich protein with Kazal motifs OS=Homo sapiens OX=9606 GN=RECK PE=1 SV=1

## Sheet: DE_June_FemvsNR_Metazoa
						Non-reproductive			Females brooding larvae
transcript_ID	logFC	logCPM	LR	PValue	FDR	Hp_61	Hp_66	Hp_69	Hp_68	Hp_71	Hp_74	Condition	BLAST_ID	BLAST_description
TRINITY_DN450_c0_g1_i2	-12.3687	8.55099	24.3033	8.22963e-07	0.00128115	0	0	0	2.227	0	3.585	Up in Females	SACS	MOUSESacsin OS=Mus musculus OX=10090 GN=Sacs PE=1 SV=2
TRINITY_DN1269_c0_g1_i45	-11.6183	7.80622	33.9115	5.76769e-09	2.87323e-05	0	0	0	3.364	0.211	5.107	Up in Females	RGS	DROMERegulator of G-protein signaling loco OS=Drosophila melanogaster OX=7227 GN=loco PE=1 SV=2
TRINITY_DN283_c0_g1_i7	-11.1515	7.34461	39.7002	2.96096e-10	7.30663e-06	0	0	0	0.429	0.523	0.151	Up in Females	FAT4	MOUSEProtocadherin Fat 4 OS=Mus musculus OX=10090 GN=Fat4 PE=1 SV=2
TRINITY_DN319_c3_g1_i5	-10.8651	7.06245	38.3652	5.8669e-10	7.30663e-06	0	0	0	2.621	1.116	1.655	Up in Females	TENS1	BOVINTensin-1 OS=Bos taurus OX=9913 GN=TNS1 PE=2 SV=1
TRINITY_DN1448_c0_g1_i10	-10.5982	6.80013	20.6661	5.46756e-06	0.00486378	0	0	0	11.796	0	12.57	Up in Females	LAMP1	CHICKLysosome-associated membrane glycoprotein 1 OS=Gallus gallus OX=9031 GN=LAMP1 PE=2 SV=1
TRINITY_DN1445_c0_g1_i54	-10.5813	6.78367	36.6163	1.4382e-09	1.19409e-05	0	0	0	0.568	0.905	0.605	Up in Females	Y508	THEMAUncharacterized protein TM
TRINITY_DN823_c0_g1_i15	-10.2221	6.43236	19.595	9.57173e-06	0.00701213	0	0	0	0	1.921	1.75	Up in Females	R213A	DANREE3 ubiquitin-protein ligase rnf213-alpha OS=Danio rerio OX=7955 GN=rnf213a PE=3 SV=1
TRINITY_DN798_c0_g1_i61	-10.1088	6.32186	18.9887	1.31495e-05	0.00779827	0	0	0	0.766	0	0.378	Up in Females	HUWE1	HUMANE3 ubiquitin-protein ligase HUWE1 OS=Homo sapiens OX=9606 GN=HUWE1 PE=1 SV=3
TRINITY_DN2368_c0_g1_i11	-10.0962	6.30979	18.9903	1.31384e-05	0.00779827	0	0	0	2.088	3.44	0	Up in Females	HOIL1	RATRanBP-type and C3HC4-type zinc finger-containing protein 1 OS=Rattus norvegicus OX=10116 GN=Rbck1 PE=1 SV=3
TRINITY_DN1135_c0_g1_i2	-10.0006	6.21689	18.562	1.64469e-05	0.00910354	0	0	0	0	1.861	1.192	Up in Females	SCRIB	DANREProtein scribble homolog OS=Danio rerio OX=7955 GN=scrib PE=1 SV=1
TRINITY_DN17855_c0_g2_i1	-9.84966	6.0705	18.1282	2.06522e-05	0.010637	0	0	0	7.771	6.075	0	Up in Females	GTPA	DICDIGTP-binding protein A OS=Dictyostelium discoideum OX=44689 GN=gtpA PE=3 SV=1
TRINITY_DN3815_c0_g1_i11	-9.76829	5.99181	17.7582	2.50828e-05	0.0120147	0	0	0	0	1.157	0.615	Up in Females	DYH7	RATDynein heavy chain 7, axonemal OS=Rattus norvegicus OX=10116 GN=Dnah7 PE=2 SV=2
TRINITY_DN3815_c0_g1_i1	-9.57711	5.80744	16.9583	3.82108e-05	0.0151072	0	0	0	0	0.724	0.794	Up in Females	DYH7	RATDynein heavy chain 7, axonemal OS=Rattus norvegicus OX=10116 GN=Dnah7 PE=2 SV=2
TRINITY_DN1623_c0_g2_i10	-9.5143	5.74708	16.7592	4.24361e-05	0.0156118	0	0	0	0	1.106	1.343	Up in Females	FREM2	LYTVAExtracellular matrix protein 3 OS=Lytechinus variegatus OX=7654 GN=ECM3 PE=1 SV=1
TRINITY_DN461_c0_g1_i4	-9.49577	5.72929	26.0522	3.32306e-07	0.000636698	0	0	0	1.09	0.463	0.653	Up in Females	UB2V1	BOVINUbiquitin-conjugating enzyme E2 variant 1 OS=Bos taurus OX=9913 GN=UBE2V1 PE=2 SV=1
TRINITY_DN1276_c0_g1_i20	-9.44916	5.68472	16.4919	4.88589e-05	0.0171681	0	0	0	1.009	1.026	0	Up in Females	MICA1	DANRE
TRINITY_DN6320_c0_g1_i1	-9.42973	5.66602	16.3037	5.39591e-05	0.0186668	0	0	0	0	0.533	0.511	Up in Females	SZT2	HUMANKICSTOR complex protein SZT2 OS=Homo sapiens OX=9606 GN=SZT2 PE=1 SV=3
TRINITY_DN5525_c0_g1_i17	-9.42602	5.66244	25.2699	4.98418e-07	0.000886756	0	0	0	0.777	1.488	1.182	Up in Females	HS90B	DANREHeat shock protein HSP 90-beta OS=Danio rerio OX=7955 GN=hsp90ab1 PE=1 SV=2
TRINITY_DN2498_c0_g1_i58	-9.37744	5.61608	16.0787	6.07639e-05	0.020733	0	0	0	0.452	0.503	0	Up in Females	DPOE1	MOUSEDNA polymerase epsilon catalytic subunit A OS=Mus musculus OX=10090 GN=Pole PE=1 SV=3
TRINITY_DN2061_c0_g1_i6	-9.35169	5.59133	24.9263	5.95656e-07	0.000989107	0	0	0	4.744	3.329	2.677	Up in Females	GLC7B	CAEELSerine/threonine-protein phosphatase PP1-beta OS=Caenorhabditis elegans OX=6239 GN=gsp-2 PE=1 SV=1
TRINITY_DN2185_c0_g1_i23	-9.32773	5.56856	15.769	7.15649e-05	0.0231499	0	0	0	0	0.644	0.35	Up in Females	MPRI	BOVINCation-independent mannose-6-phosphate receptor OS=Bos taurus OX=9913 GN=IGF2R PE=1 SV=2
TRINITY_DN3007_c0_g1_i12	-9.28935	5.53173	20.0476	7.55393e-06	0.00587979	0	0	0	0.8	0.04	0.69	Up in Females	G3P	COTJAGlyceraldehyde-3-phosphate dehydrogenase OS=Coturnix japonica OX=93934 GN=GAPDH PE=2 SV=2
TRINITY_DN1400_c0_g1_i15	-9.28886	5.53133	23.8143	1.06093e-06	0.00155445	0	0	0	2.679	2.243	4.568	Up in Females	SVEP1	MOUSESushi, von Willebrand factor type A, EGF and pentraxin domain-containing protein 1 OS=Mus musculus OX=10090 GN=Svep1 PE=1 SV=1
TRINITY_DN306_c0_g1_i11	-9.21746	5.46314	14.3092	0.000155108	0.0348057	0	0	0	0	0.111	0.908	Up in Females	YRD6	CAEELUncharacterized protein K02A2.6 OS=Caenorhabditis elegans OX=6239 GN=K02A2.6 PE=4 SV=1
TRINITY_DN960_c0_g1_i4	-9.20532	5.45178	23.0716	1.56078e-06	0.00204401	0	0	0	0.882	0.382	0.757	Up in Females	DNLI4	CHICKDNA ligase 4 OS=Gallus gallus OX=9031 GN=LIG4 PE=2 SV=2
TRINITY_DN1623_c0_g1_i26	-9.13147	5.38167	14.909	0.000112823	0.0295809	0	0	0	0	1.237	1.494	Up in Females	TRCB	XENLABeta-TrCP OS=Xenopus laevis OX=8355 GN=fbxw1 PE=1 SV=1
TRINITY_DN518_c0_g1_i11	-9.12438	5.37491	22.2531	2.38968e-06	0.00258792	0	0	0	1.148	0.533	1.192	Up in Females	EPHA1	HUMANEphrin type-A receptor 1 OS=Homo sapiens OX=9606 GN=EPHA1 PE=1 SV=4
TRINITY_DN107_c0_g1_i40	-9.11702	5.36769	13.9869	0.000184088	0.0388582	0	0	0	0.267	0	1.702	Up in Females	NUCB2	RATNucleobindin-2 OS=Rattus norvegicus OX=10116 GN=Nucb2 PE=1 SV=1
TRINITY_DN2460_c0_g1_i6	-9.11027	5.36165	14.8321	0.000117517	0.0297585	0	0	0	0	0.563	0.407	Up in Females	TPR	RATNucleoprotein TPR OS=Rattus norvegicus OX=10116 GN=Tpr PE=1 SV=1
TRINITY_DN3163_c0_g1_i7	-9.06399	5.31761	13.8404	0.000199013	0.0396561	0	0	0	1.021	0	0.123	Up in Females	LAMA1	MOUSELaminin subunit alpha-1 OS=Mus musculus OX=10090 GN=Lama1 PE=1 SV=2
TRINITY_DN642_c0_g1_i112	-9.05588	5.31005	21.0006	4.59147e-06	0.00432167	0	0	0	1.102	0.322	0.322	Up in Females	DMBT1	MOUSEDeleted in malignant brain tumors 1 protein OS=Mus musculus OX=10090 GN=Dmbt1 PE=1 SV=2
TRINITY_DN271_c2_g1_i1	-9.03074	5.2861	14.4066	0.000147286	0.0342861	0	0	0	0.916	0	0.851	Up in Females	PCDH9	HUMANProtocadherin-9 OS=Homo sapiens OX=9606 GN=PCDH9 PE=1 SV=2
TRINITY_DN6608_c0_g1_i12	-8.98788	5.24585	14.0467	0.000178325	0.0382906	0	0	0	1.055	0.322	0	Up in Females	PCNT	HUMANPericentrin OS=Homo sapiens OX=9606 GN=PCNT PE=1 SV=4
TRINITY_DN1703_c0_g1_i34	-8.93303	5.19413	20.9621	4.68465e-06	0.00432167	0	0	0	0.754	0.422	0.549	Up in Females	PIAS2	RATE3 SUMO-protein ligase PIAS2 OS=Rattus norvegicus OX=10116 GN=Pias2 PE=1 SV=1
TRINITY_DN5288_c0_g1_i9	-8.92587	5.18744	20.3928	6.30676e-06	0.00541685	0	0	0	0.151	0.392	0.227	Up in Females	SACS	MOUSESacsin OS=Mus musculus OX=10090 GN=Sacs PE=1 SV=2
TRINITY_DN4586_c0_g1_i7	-8.88892	5.15248	13.6894	0.000215673	0.0411251	0	0	0	6.518	0	2.327	Up in Females	TRAF5	MOUSETNF receptor-associated factor 5 OS=Mus musculus OX=10090 GN=Traf5 PE=1 SV=1
TRINITY_DN1302_c0_g1_i7	-8.82925	5.09666	17.1507	3.45284e-05	0.0143339	0	0	0	0.046	0.614	0.757	Up in Females	TSC1	MOUSEHamartin OS=Mus musculus OX=10090 GN=Tsc1 PE=1 SV=1
TRINITY_DN12570_c0_g1_i11	-8.65619	4.93517	18.1903	1.99899e-05	0.0105938	0	0	0	0.128	0.392	0.227	Up in Females	WDR81	RATWD repeat-containing protein 81 OS=Rattus norvegicus OX=10116 GN=Wdr81 PE=3 SV=1
TRINITY_DN6_c1_g1_i5	-8.64085	4.92089	18.3806	1.80895e-05	0.00979505	0	0	0	0.174	0.392	0.293	Up in Females	NOM1	HUMANNucleolar MIF4G domain-containing protein 1 OS=Homo sapiens OX=9606 GN=NOM1 PE=1 SV=1
TRINITY_DN5186_c0_g1_i10	-8.5903	4.87399	18.0527	2.14871e-05	0.010704	0	0	0	1.879	1.76	0.738	Up in Females	WASC3	XENLAWASH complex subunit 3 OS=Xenopus laevis OX=8355 GN=washc3 PE=2 SV=1
TRINITY_DN2231_c0_g1_i12	-8.55027	4.83688	17.6204	2.6968e-05	0.0125693	0	0	0	1.055	0.473	0.293	Up in Females	SQOR	HUMANSulfide:quinone oxidoreductase, mitochondrial OS=Homo sapiens OX=9606 GN=SQOR PE=1 SV=1
TRINITY_DN1584_c0_g1_i14	-8.51182	4.80135	17.2773	3.23025e-05	0.0138723	0	0	0	0.267	0.101	0.076	Up in Females	DOT1L	HUMANHistone-lysine N-methyltransferase, H3 lysine-79 specific OS=Homo sapiens OX=9606 GN=DOT1L PE=1 SV=3
TRINITY_DN2741_c0_g1_i1	-8.42223	4.71895	17.3414	3.12305e-05	0.0136472	0	0	0	1.067	1.086	0.445	Up in Females	PP2BB	HUMANSerine/threonine-protein phosphatase 2B catalytic subunit beta isoform OS=Homo sapiens OX=9606 GN=PPP3CB PE=1 SV=2
TRINITY_DN2004_c0_g1_i44	-8.35834	4.66016	15.6808	7.49801e-05	0.0236424	0	0	0	0.719	0.111	0.681	Up in Females	HELLS	HUMANLymphoid-specific helicase OS=Homo sapiens OX=9606 GN=HELLS PE=1 SV=1
TRINITY_DN15987_c0_g1_i43	-8.34623	4.64921	16.9029	3.93423e-05	0.0152157	0	0	0	0.255	0.251	0.34	Up in Females	SNR40	MOUSEU5 small nuclear ribonucleoprotein 40 kDa protein OS=Mus musculus OX=10090 GN=Snrnp40 PE=1 SV=1
TRINITY_DN6308_c0_g1_i35	-8.30797	4.61433	16.8854	3.97068e-05	0.0152157	0	0	0	0.336	0.332	0.236	Up in Females	RGS22	HUMANRegulator of G-protein signaling 22 OS=Homo sapiens OX=9606 GN=RGS22 PE=1 SV=3
TRINITY_DN12570_c0_g1_i17	-8.17359	4.49256	14.3833	0.000149117	0.0343908	0	0	0	0.07	0.422	0.057	Up in Females	WDR81	RATWD repeat-containing protein 81 OS=Rattus norvegicus OX=10116 GN=Wdr81 PE=3 SV=1
TRINITY_DN6159_c0_g1_i13	-8.14495	4.46628	15.6007	7.82236e-05	0.0243549	0	0	0	0.209	0.171	0.35	Up in Females	YG31B	YEASTTransposon Ty3-G Gag-Pol polyprotein OS=Saccharomyces cerevisiae (strain ATCC 204508 / S288c) OX=559292 GN=TY3B-G PE=1 SV=3
TRINITY_DN10513_c0_g1_i19	-8.13599	4.45807	14.6554	0.000129065	0.0312918	0	0	0	0.186	0.111	0.558	Up in Females	INT4	MOUSEIntegrator complex subunit 4 OS=Mus musculus OX=10090 GN=Ints4 PE=1 SV=1
TRINITY_DN18792_c0_g1_i7	-8.12103	4.44484	15.7763	7.12895e-05	0.0231499	0	0	0	0.267	0.463	0.322	Up in Females	HECD3	HUMANE3 ubiquitin-protein ligase HECTD3 OS=Homo sapiens OX=9606 GN=HECTD3 PE=1 SV=1
TRINITY_DN5764_c0_g1_i78	-8.11588	4.44046	14.2352	0.000161324	0.0355598	0	0	0	0.197	1.297	0.208	Up in Females	PLPL9	HUMAN85/88 kDa calcium-independent phospholipase A2 OS=Homo sapiens OX=9606 GN=PLA2G6 PE=1 SV=2
TRINITY_DN4795_c0_g1_i16	-8.0885	4.41555	15.2121	9.6086e-05	0.0272951	0	0	0	0.383	1.237	1.012	Up in Females	PICK1	HUMANPRKCA-binding protein OS=Homo sapiens OX=9606 GN=PICK1 PE=1 SV=2
TRINITY_DN4301_c0_g1_i17	-8.08375	4.41129	15.5507	8.03206e-05	0.0246991	0	0	0	0.406	0.362	0.161	Up in Females	NU160	HUMANNuclear pore complex protein Nup160 OS=Homo sapiens OX=9606 GN=NUP160 PE=1 SV=3
TRINITY_DN642_c0_g1_i77	-7.97771	4.31616	14.8272	0.000117823	0.0297585	0	0	0	0.371	0.111	0.293	Up in Females	DMBT1	MOUSEDeleted in malignant brain tumors 1 protein OS=Mus musculus OX=10090 GN=Dmbt1 PE=1 SV=2
TRINITY_DN996_c0_g1_i4	-7.95757	4.29834	15.0311	0.000105755	0.0289466	0	0	0	2.215	1.187	0.785	Up in Females	FB252	ARATHF-box protein At5g06550 OS=Arabidopsis thaliana OX=3702 GN=At5g06550 PE=2 SV=1
TRINITY_DN20234_c0_g1_i26	-7.93762	4.28058	15.1839	9.75294e-05	0.0272951	0	0	0	0.545	0.362	0.293	Up in Females	IMA7	BOVINImportin subunit alpha-7 OS=Bos taurus OX=9913 GN=KPNA6 PE=2 SV=1
TRINITY_DN655_c0_g1_i19	-7.91224	4.25791	13.9341	0.00018933	0.0392984	0	0	0	0.754	0.101	0.236	Up in Females	EGTB	MYCS2Hercynine oxygenase OS=Mycolicibacterium smegmatis (strain ATCC 700084 / mc(2)155) OX=246196 GN=egtB PE=1 SV=1
TRINITY_DN105_c2_g1_i30	-7.90457	4.25121	14.8199	0.000118279	0.0297585	0	0	0	0.302	0.131	0.113	Up in Females	TRAF5	MOUSETNF receptor-associated factor 5 OS=Mus musculus OX=10090 GN=Traf5 PE=1 SV=1
TRINITY_DN3040_c0_g1_i12	-7.89409	4.24198	14.9964	0.000107716	0.029163	0	0	0	0.499	0.764	0.624	Up in Females	JAG1	HUMANProtein jagged-1 OS=Homo sapiens OX=9606 GN=JAG1 PE=1 SV=3
TRINITY_DN49_c1_g1_i37	-7.88424	4.23314	14.6058	0.000132508	0.0314333	0	0	0	0.139	0.181	0.322	Up in Females	PITM1	MOUSEMembrane-associated phosphatidylinositol transfer protein 1 OS=Mus musculus OX=10090 GN=Pitpnm1 PE=1 SV=1
TRINITY_DN1006_c0_g1_i46	-7.87963	4.22945	13.7254	0.000211576	0.0411251	0	0	0	0.151	0.483	0.066	Up in Females	WASC5	XENTRWASH complex subunit 5 OS=Xenopus tropicalis OX=8364 GN=washc5 PE=2 SV=1
TRINITY_DN4540_c0_g1_i60	-7.87779	4.22759	14.7616	0.000121992	0.030085	0	0	0	0.151	0.151	0.066	Up in Females	PSMD8	PONAB26S proteasome non-ATPase regulatory subunit 8 (Fragment) OS=Pongo abelii OX=9601 GN=PSMD8 PE=2 SV=2
TRINITY_DN4248_c0_g1_i19	-7.87619	4.22627	13.6467	0.000220627	0.0411251	0	0	0	0.348	0.332	0.038	Up in Females	LEV9	CAEELProtein lev-9 OS=Caenorhabditis elegans OX=6239 GN=lev-9 PE=1 SV=3
TRINITY_DN2768_c0_g1_i22	-7.84771	4.20086	14.7868	0.000120376	0.0299832	0	0	0	0.116	0.111	0.17	Up in Females	TCPQ	HUMANT-complex protein 1 subunit theta OS=Homo sapiens OX=9606 GN=CCT8 PE=1 SV=4
TRINITY_DN5001_c1_g1_i190	-7.83446	4.18927	14.3562	0.000151278	0.0345692	0	0	0	0.232	0.131	0.057	Up in Females	HBS1L	HUMANHBS1-like protein OS=Homo sapiens OX=9606 GN=HBS1L PE=1 SV=1
TRINITY_DN308_c0_g1_i7	-7.7114	4.08118	14.2461	0.000160395	0.0355598	0	0	0	0.29	0.141	0.218	Up in Females	HNRL1	HUMANHeterogeneous nuclear ribonucleoprotein U-like protein 1 OS=Homo sapiens OX=9606 GN=HNRNPUL1 PE=1 SV=2
TRINITY_DN2968_c0_g1_i166	-7.66553	4.04134	13.8436	0.000198677	0.0396561	0	0	0	0.603	0.382	0.199	Up in Females	RF1	RICM5Peptide chain release factor 1 OS=Rickettsia massiliae (strain Mtu5) OX=416276 GN=prfA PE=3 SV=1
TRINITY_DN837_c0_g1_i195	-7.66464	4.04061	14.013	0.000181548	0.0386496	0	0	0	0.104	0.121	0.066	Up in Females	GABR2	RATGamma-aminobutyric acid type B receptor subunit 2 OS=Rattus norvegicus OX=10116 GN=Gabbr2 PE=1 SV=2
TRINITY_DN884_c1_g1_i14	-7.65682	4.03359	13.5857	0.00022792	0.041743	0	0	0	0.128	0.08	0.208	Up in Females	PLCC	HUMAN1-acyl-sn-glycerol-3-phosphate acyltransferase gamma OS=Homo sapiens OX=9606 GN=AGPAT3 PE=1 SV=1
TRINITY_DN3651_c0_g1_i2	-7.63612	4.01578	13.9185	0.000190907	0.0392984	0	0	0	0.128	0.141	0.142	Up in Females	TF3C3	HUMANGeneral transcription factor 3C polypeptide 3 OS=Homo sapiens OX=9606 GN=GTF3C3 PE=1 SV=1
TRINITY_DN2457_c0_g1_i4	-7.62088	4.00274	13.4673	0.000242753	0.0441349	0	0	0	0.313	0.885	0.407	Up in Females	SNED1	MOUSESushi, nidogen and EGF-like domain-containing protein 1 OS=Mus musculus OX=10090 GN=Sned1 PE=2 SV=2
TRINITY_DN13738_c0_g1_i3	-7.48281	3.88386	13.3058	0.00026459	0.047413	0	0	0	0.522	0.392	0.34	Up in Females	Y9863	DICDIProbable serine/threonine-protein kinase DDB
TRINITY_DN33_c0_g1_i22	6.11287	7.20084	15.1901	9.72124e-05	0.0272951	0.973	0.236	1.157	0	0.03	0	Up in Males	PCF11	HUMANPre-mRNA cleavage complex 2 protein Pcf11 OS=Homo sapiens OX=9606 GN=PCF11 PE=1 SV=3
TRINITY_DN150_c0_g1_i28	6.72958	5.2035	14.8686	0.000115265	0.0297585	1.116	2.184	3.552	0	0	0.047	Up in Males	KCC2D	RATCalcium/calmodulin-dependent protein kinase type II subunit delta OS=Rattus norvegicus OX=10116 GN=Camk2d PE=1 SV=1
TRINITY_DN1836_c0_g1_i3	7.28734	7.54267	28.5406	9.1753e-08	0.000228538	21.76	14.852	14.755	0	0.181	0.113	Up in Males	PRDX6	PIGPeroxiredoxin-6 OS=Sus scrofa OX=9823 GN=PRDX6 PE=2 SV=3
TRINITY_DN1779_c1_g1_i107	7.4259	4.29447	13.6275	0.000222896	0.0411251	0.295	0.272	0.185	0	0	0	Up in Males	F264	RAT6-phosphofructo-2-kinase/fructose-2,6-bisphosphatase 4 OS=Rattus norvegicus OX=10116 GN=Pfkfb4 PE=1 SV=3
TRINITY_DN219_c0_g1_i189	7.68171	4.06182	13.6367	0.000221804	0.0411251	0.161	0.163	0.225	0	0	0	Up in Males	XPO1	HUMANExportin-1 OS=Homo sapiens OX=9606 GN=XPO1 PE=1 SV=1
TRINITY_DN5899_c0_g1_i14	7.72084	4.09554	13.807	0.000202577	0.0399014	0.259	0.172	0.225	0	0	0	Up in Males	FANCM	HUMANFanconi anemia group M protein OS=Homo sapiens OX=9606 GN=FANCM PE=1 SV=2
TRINITY_DN3164_c0_g1_i8	7.74012	4.11175	13.4261	0.000248146	0.0447886	0.304	0.109	0.113	0	0	0	Up in Males	MTM1	XENTRMyotubularin OS=Xenopus tropicalis OX=8364 GN=mtm1 PE=2 SV=1
TRINITY_DN6798_c0_g1_i9	7.75983	4.1299	13.6818	0.000216544	0.0411251	0.125	0.154	0.064	0	0	0	Up in Males	PTPRQ	MOUSEPhosphatidylinositol phosphatase PTPRQ OS=Mus musculus OX=10090 GN=Ptprq PE=1 SV=1
TRINITY_DN763_c0_g1_i132	7.83122	4.19249	14.1522	0.000168596	0.0368367	0.277	0.381	0.619	0	0	0	Up in Males	SESN1	XENLASestrin-1 OS=Xenopus laevis OX=8355 GN=sesn1 PE=2 SV=1
TRINITY_DN844_c0_g1_i18	7.85325	4.21117	14.106	0.000172788	0.0374243	0.313	0.145	0.177	0	0	0	Up in Males	MTRAA	XENLAMyotubularin-related protein 10-A OS=Xenopus laevis OX=8355 GN=mtmr10-a PE=2 SV=1
TRINITY_DN2061_c0_g1_i5	7.85977	4.21685	13.799	0.000203448	0.0399014	1.045	0.299	1.181	0	0	0	Up in Males	GLC7B	CAEELSerine/threonine-protein phosphatase PP1-beta OS=Caenorhabditis elegans OX=6239 GN=gsp-2 PE=1 SV=1
TRINITY_DN16810_c0_g1_i46	7.91101	4.26204	13.887	0.00019414	0.0393141	0.598	0.29	0.153	0	0	0	Up in Males	PKHG3	MOUSEPleckstrin homology domain-containing family G member 3 OS=Mus musculus OX=10090 GN=Plekhg3 PE=1 SV=2
TRINITY_DN865_c0_g1_i42	7.95132	4.2986	13.6552	0.000219628	0.0411251	0.098	0.136	0.024	0	0	0	Up in Males	ST32A	MOUSESerine/threonine-protein kinase 32A OS=Mus musculus OX=10090 GN=Stk32a PE=2 SV=1
TRINITY_DN48_c0_g1_i125	7.99864	4.34057	14.9166	0.000112369	0.0295809	0.196	0.263	0.33	0	0	0	Up in Males	FNBP4	MOUSEFormin-binding protein 4 OS=Mus musculus OX=10090 GN=Fnbp4 PE=1 SV=2
TRINITY_DN642_c0_g1_i157	8.05894	4.39306	13.8962	0.000193185	0.0393141	0.607	0.118	0.137	0	0	0	Up in Males	DMBT1	HUMANDeleted in malignant brain tumors 1 protein OS=Homo sapiens OX=9606 GN=DMBT1 PE=1 SV=2
TRINITY_DN5159_c0_g1_i39	8.0666	4.40108	15.1116	0.000101339	0.0280461	0.241	0.227	0.378	0	0	0	Up in Males	REP	PCV2Replication-associated protein OS=Porcine circovirus 2 OX=85708 GN=Rep PE=1 SV=1
TRINITY_DN5505_c0_g1_i13	8.08182	4.414	14.336	0.000152913	0.034625	0.732	0.299	0.161	0	0	0	Up in Males	HERC4	MOUSEProbable E3 ubiquitin-protein ligase HERC4 OS=Mus musculus OX=10090 GN=Herc4 PE=1 SV=2
TRINITY_DN1448_c0_g1_i12	8.24294	6.4496	15.3371	8.99328e-05	0.0266672	0	8.79	9.829	0	0.04	0	Up in Males	LMP1	CAEELLAMP family protein lmp-1 OS=Caenorhabditis elegans OX=6239 GN=lmp-1 PE=2 SV=1
TRINITY_DN3738_c0_g2_i2	8.25678	6.21192	14.5565	0.000136017	0.0319614	0.804	0	1.439	0	0	0	Up in Males	PAR14	HUMANProtein mono-ADP-ribosyltransferase PARP14 OS=Homo sapiens OX=9606 GN=PARP14 PE=1 SV=3
TRINITY_DN506_c0_g1_i125	8.29904	4.61104	16.0371	6.21143e-05	0.0209073	0.143	0.254	0.321	0	0	0	Up in Males	FNIP1	MOUSEFolliculin-interacting protein 1 OS=Mus musculus OX=10090 GN=Fnip1 PE=1 SV=1
TRINITY_DN1345_c0_g1_i16	8.30517	4.61578	15.3105	9.12064e-05	0.0267267	0.589	0.254	0.129	0	0	0	Up in Males	SAC2	HUMANPhosphatidylinositide phosphatase SAC2 OS=Homo sapiens OX=9606 GN=INPP5F PE=1 SV=3
TRINITY_DN2246_c0_g1_i5	8.32585	4.63473	15.4849	8.31648e-05	0.0252618	0.411	0.208	0.096	0	0	0	Up in Males	DOC11	MOUSEDedicator of cytokinesis protein 11 OS=Mus musculus OX=10090 GN=Dock11 PE=1 SV=1
TRINITY_DN1179_c0_g1_i130	8.35409	4.66162	15.2031	9.65445e-05	0.0272951	0.196	0.625	0.113	0	0	0	Up in Males	RUVB2	XENLARuvB-like 2 OS=Xenopus laevis OX=8355 GN=ruvbl2 PE=2 SV=1
TRINITY_DN892_c0_g1_i23	8.37251	4.67776	16.4888	4.89376e-05	0.0171681	0.241	0.236	0.418	0	0	0	Up in Males	PMS2	CHICKMismatch repair endonuclease PMS2 OS=Gallus gallus OX=9031 GN=PMS2 PE=2 SV=3
TRINITY_DN305_c0_g1_i60	8.48225	4.77821	16.7232	4.32478e-05	0.0156118	0.455	0.408	0.177	0	0	0	Up in Males	SORT	MOUSESortilin OS=Mus musculus OX=10090 GN=Sort1 PE=1 SV=1
TRINITY_DN1875_c0_g1_i11	8.52988	4.82295	15.882	6.74156e-05	0.0223892	0.321	2.429	0.86	0	0	0	Up in Males	LRC58	XENLALeucine-rich repeat-containing protein 58 OS=Xenopus laevis OX=8355 GN=lrrc58 PE=2 SV=1
TRINITY_DN1017_c0_g1_i13	8.61755	4.90289	17.8285	2.41733e-05	0.0118061	0.83	0.48	0.555	0	0	0	Up in Males	S2544	HUMANSolute carrier family 25 member 44 OS=Homo sapiens OX=9606 GN=SLC25A44 PE=2 SV=1
TRINITY_DN10513_c0_g1_i2	8.75054	5.02621	17.5657	2.77545e-05	0.0125693	0.848	0.381	0.161	0	0	0	Up in Males	INT4	MOUSEIntegrator complex subunit 4 OS=Mus musculus OX=10090 GN=Ints4 PE=1 SV=1
TRINITY_DN1430_c0_g1_i2	8.75307	5.02975	16.7406	4.28529e-05	0.0156118	0.098	0.988	0.346	0	0	0	Up in Males	POL3	DROMERetrovirus-related Pol polyprotein from transposon 17.6 OS=Drosophila melanogaster OX=7227 GN=pol PE=4 SV=1
TRINITY_DN880_c0_g1_i11	8.86697	5.13561	19.3928	1.06408e-05	0.00736223	0.232	0.535	0.338	0	0	0	Up in Males	PARG	BOVINPoly(ADP-ribose) glycohydrolase OS=Bos taurus OX=9913 GN=PARG PE=1 SV=1
TRINITY_DN511_c0_g1_i12	8.87631	5.83715	15.4023	8.68819e-05	0.0260729	0	0.562	0.45	0	0	0	Up in Males	TRNK1	HUMANTPR and ankyrin repeat-containing protein 1 OS=Homo sapiens OX=9606 GN=TRANK1 PE=2 SV=4
TRINITY_DN1515_c0_g1_i3	8.89516	5.16086	13.2268	0.000275977	0.0491002	1.5	0	1.342	0	0	0	Up in Males	DLISH	DROMESH3 domain-containing protein Dlish OS=Drosophila melanogaster OX=7227 GN=Dlish PE=1 SV=1
TRINITY_DN365_c1_g1_i2	8.95254	5.21659	13.7105	0.000213263	0.0411251	0	1.069	1.117	0	0	0	Up in Males	DRG1	XENLADevelopmentally-regulated GTP-binding protein 1 OS=Xenopus laevis OX=8355 GN=drg1 PE=1 SV=1
TRINITY_DN58209_c0_g1_i2	8.97133	5.23235	16.7243	4.32232e-05	0.0156118	2.339	0.109	0.378	0	0	0	Up in Males	TEX14	BOVINInactive serine/threonine-protein kinase TEX14 OS=Bos taurus OX=9913 GN=TEX14 PE=3 SV=2
TRINITY_DN3460_c0_g1_i5	8.97911	5.2407	19.7133	8.99734e-06	0.00679108	0.491	0.408	1.527	0	0	0	Up in Males	GCSH	CARHZGlycine cleavage system H protein OS=Carboxydothermus hydrogenoformans (strain ATCC BAA-161 / DSM 6008 / Z-2901) OX=246194 GN=gcvH PE=3 SV=1
TRINITY_DN2749_c0_g1_i4	9.08423	5.33932	17.1182	3.51239e-05	0.0143421	3.929	0.109	4.404	0	0	0	Up in Males	GBB1	CAEBRGuanine nucleotide-binding protein subunit beta-1 OS=Caenorhabditis briggsae OX=6238 GN=gpb-1 PE=3 SV=1
TRINITY_DN4170_c0_g1_i12	9.1049	5.35922	21.1924	4.15404e-06	0.00413875	0.277	0.1	0.241	0	0	0	Up in Males	HECD4	HUMANProbable E3 ubiquitin-protein ligase HECTD4 OS=Homo sapiens OX=9606 GN=HECTD4 PE=1 SV=5
TRINITY_DN488_c0_g1_i11	9.13963	5.39221	22.1284	2.55011e-06	0.00264659	1.143	0.879	1.133	0	0	0	Up in Males	UBE2S	NEMVEUbiquitin-conjugating enzyme E2 S OS=Nematostella vectensis OX=45351 GN=v1g237158 PE=3 SV=1
TRINITY_DN7769_c0_g1_i6	9.20702	5.45616	22.61	1.98444e-06	0.00224675	0.938	0.997	1.752	0	0	0	Up in Males	TAB1	HUMANTGF-beta-activated kinase 1 and MAP3K7-binding protein 1 OS=Homo sapiens OX=9606 GN=TAB1 PE=1 SV=1
TRINITY_DN3691_c0_g1_i117	9.21463	5.46381	14.6323	0.000130655	0.0312918	0	0.426	1.398	0	0	0	Up in Males	MCCA	HUMANMethylcrotonoyl-CoA carboxylase subunit alpha, mitochondrial OS=Homo sapiens OX=9606 GN=MCCC1 PE=1 SV=3
TRINITY_DN3140_c0_g1_i16	9.2159	5.46389	14.6345	0.000130503	0.0312918	0.473	0	0.498	0	0	0	Up in Males	RFC5	MOUSEReplication factor C subunit 5 OS=Mus musculus OX=10090 GN=Rfc5 PE=1 SV=1
TRINITY_DN3560_c0_g1_i93	9.23482	5.4825	22.975	1.64125e-06	0.00204401	0.402	0.263	0.33	0	0	0	Up in Males	NU188	HUMANNucleoporin NUP188 homolog OS=Homo sapiens OX=9606 GN=NUP188 PE=1 SV=1
TRINITY_DN1189_c0_g1_i20	9.27755	5.52416	14.9124	0.000112618	0.0295809	0	0.707	0.289	0	0	0	Up in Males	LAMB1	MOUSELaminin subunit beta-1 OS=Mus musculus OX=10090 GN=Lamb1 PE=1 SV=3
TRINITY_DN1276_c0_g1_i26	9.28622	5.53141	22.6407	1.95304e-06	0.00224675	0.464	0.29	1.061	0	0	0	Up in Males	MICA1	DANRE
TRINITY_DN573_c0_g1_i12	9.30152	5.54655	18.1031	2.09256e-05	0.010637	0.018	0.888	0.78	0	0	0	Up in Males	EDC4	DANREEnhancer of mRNA-decapping protein 4 OS=Danio rerio OX=7955 GN=edc4 PE=3 SV=1
TRINITY_DN319_c0_g1_i1	9.40611	5.64442	13.9508	0.000187661	0.0392795	3.054	0	0.185	0	0	0	Up in Males	RECK	HUMANReversion-inducing cysteine-rich protein with Kazal motifs OS=Homo sapiens OX=9606 GN=RECK PE=1 SV=1
TRINITY_DN1388_c0_g1_i5	9.55615	5.78948	26.3328	2.87367e-07	0.000596479	1.438	1.55	1.889	0	0	0	Up in Males	PINK1	HUMANSerine/threonine-protein kinase PINK1, mitochondrial OS=Homo sapiens OX=9606 GN=PINK1 PE=1 SV=1
TRINITY_DN1266_c0_g1_i14	9.58343	5.81487	15.6807	7.49859e-05	0.0236424	1.616	0.317	0	0	0	0	Up in Males	ZNFX1	MOUSENFX1-type zinc finger-containing protein 1 OS=Mus musculus OX=10090 GN=Znfx1 PE=1 SV=3
TRINITY_DN1611_c0_g1_i24	9.67203	5.90086	27.0599	1.97243e-07	0.00044663	0.884	0.616	0.603	0	0	0	Up in Males	MOCS1	MOUSEMolybdenum cofactor biosynthesis protein 1 OS=Mus musculus OX=10090 GN=Mocs1 PE=1 SV=2
TRINITY_DN2703_c0_g1_i15	9.73969	5.96597	16.9823	3.7729e-05	0.0151072	0.688	0.616	0	0	0	0	Up in Males	LPLT2	CAEELLatrophilin-like protein LAT-2 OS=Caenorhabditis elegans OX=6239 GN=lat-2 PE=2 SV=1
TRINITY_DN4068_c0_g1_i4	9.83693	6.06032	17.5199	2.84314e-05	0.0126459	0	14.118	23.869	0	0	0	Up in Males	RS19	BRABE40S ribosomal protein S19 OS=Branchiostoma belcheri OX=7741 GN=RPS19 PE=2 SV=1
TRINITY_DN3667_c0_g1_i3	9.87287	6.09496	17.2258	3.31898e-05	0.0140117	0	0.39	1.406	0	0	0	Up in Males	TEP1	HUMANTelomerase protein component 1 OS=Homo sapiens OX=9606 GN=TEP1 PE=1 SV=2
TRINITY_DN1346_c0_g1_i1	9.90721	6.12794	29.6872	5.07697e-08	0.000158071	3.152	2.909	3.44	0	0	0	Up in Males	NFED	RHIMLNodulation efficiency protein NfeD OS=Rhizobium meliloti OX=382 GN=nfeD PE=3 SV=1
TRINITY_DN266_c0_g1_i164	9.96252	6.18152	28.6149	8.83009e-08	0.000228538	1.438	1.269	4.018	0	0	0	Up in Males	PGBD4	HUMANPiggyBac transposable element-derived protein 4 OS=Homo sapiens OX=9606 GN=PGBD4 PE=2 SV=3
TRINITY_DN5879_c0_g1_i11	9.99322	6.21104	17.5817	2.75217e-05	0.0125693	2.482	0	5.087	0	0	0	Up in Males	GATA1	CHICKErythroid transcription factor OS=Gallus gallus OX=9031 GN=GATA1 PE=1 SV=1
TRINITY_DN139_c0_g1_i16	10.1104	6.32547	18.5723	1.63577e-05	0.00910354	0	9.669	7.571	0	0	0	Up in Males	TSN7	MOUSETetraspanin-7 OS=Mus musculus OX=10090 GN=Tspan7 PE=1 SV=2
TRINITY_DN1343_c0_g1_i22	10.2082	6.42059	19.0083	1.30153e-05	0.00779827	0	2.7	2.395	0	0	0	Up in Males	DLG5	MOUSEDisks large homolog 5 OS=Mus musculus OX=10090 GN=Dlg5 PE=1 SV=1
TRINITY_DN2277_c0_g1_i3	10.2146	6.42652	31.991	1.54891e-08	5.51145e-05	0.964	0.68	1.704	0	0	0	Up in Males	FKB15	MOUSEFK506-binding protein 15 OS=Mus musculus OX=10090 GN=Fkbp15 PE=1 SV=2
TRINITY_DN4155_c0_g1_i10	10.2796	6.48965	18.792	1.45776e-05	0.00844416	0.821	0	1.495	0	0	0	Up in Males	LRK1	CAEELLeucine-rich repeat serine/threonine-protein kinase 1 OS=Caenorhabditis elegans OX=6239 GN=lrk-1 PE=1 SV=6
TRINITY_DN383_c0_g1_i21	10.3469	6.55528	19.0292	1.28734e-05	0.00779827	0.732	0	0.98	0	0	0	Up in Males	VIGLN	HUMANVigilin OS=Homo sapiens OX=9606 GN=HDLBP PE=1 SV=2
TRINITY_DN167_c2_g1_i1	10.3549	6.56364	19.4657	1.02423e-05	0.00728897	0	4.105	4.316	0	0	0	Up in Males	MOXD1	DANREDBH-like monooxygenase protein 1 homolog OS=Danio rerio OX=7955 GN=moxd1 PE=2 SV=2
TRINITY_DN488_c0_g1_i2	10.4672	6.67309	33.3198	7.81834e-09	3.24565e-05	2.42	1.849	5.754	0	0	0	Up in Males	TAB1	HUMANTGF-beta-activated kinase 1 and MAP3K7-binding protein 1 OS=Homo sapiens OX=9606 GN=TAB1 PE=1 SV=1
TRINITY_DN387_c0_g1_i10	10.4701	6.67578	19.3127	1.10966e-05	0.00747014	0.732	0	1.439	0	0	0	Up in Males	PTPRS	CHICKReceptor-type tyrosine-protein phosphatase S OS=Gallus gallus OX=9031 GN=PTPRS PE=1 SV=3
TRINITY_DN1737_c0_g1_i13	10.6513	6.85346	35.5166	2.52882e-09	1.57469e-05	2.973	1.278	1.832	0	0	0	Up in Males	NOP2	HUMANProbable 28S rRNA (cytosine(4447)-C(5))-methyltransferase OS=Homo sapiens OX=9606 GN=NOP2 PE=1 SV=2
TRINITY_DN10305_c0_g1_i8	10.6759	6.87763	20.0885	7.3941e-06	0.00587979	4.92	9.107	0	0	0	0	Up in Males	PR15A	BOVINProtein phosphatase 1 regulatory subunit 15A OS=Bos taurus OX=9913 GN=PPP1R15A PE=2 SV=2
TRINITY_DN140_c0_g1_i83	11.03	7.22527	19.21	1.17097e-05	0.00767541	6.67	0.48	0	0	0	0	Up in Males	TRAF2	HUMANTNF receptor-associated factor 2 OS=Homo sapiens OX=9606 GN=TRAF2 PE=1 SV=2
TRINITY_DN72_c0_g1_i38	11.0632	7.25864	20.2368	6.84243e-06	0.00568104	0.991	5.229	0	0	0	0	Up in Males	RNF31	MOUSEE3 ubiquitin-protein ligase RNF31 OS=Mus musculus OX=10090 GN=Rnf31 PE=1 SV=2
TRINITY_DN3073_c0_g1_i5	12.0934	8.27779	23.2441	1.42688e-06	0.00197448	1.259	1.55	0	0	0	0	Up in Males	TITIN	HUMANTitin OS=Homo sapiens OX=9606 GN=TTN PE=1 SV=4
