# Supplementary material for: Phagocytosis of microbial symbionts supports embryonic nutrition in the sponge Halichondria panicea
Source: Research Square preprint supplement (doi:10.21203/rs.3.rs-7749905/v1), 2025-12-02
Supplement: Supplementary file 8 [file bbe85a815c657f9aadfdeafc.xlsx]

## Sheet: ALL
Transcript	Cluster	GO from FANTASIA	KO	Gene	Module
TRINITY_DN705_c0_g4_i1	6	#N/A	K00343	nuoN	NADH:ubiquinone oxidoreductase subunit 2 (chain N)
TRINITY_DN3007_c0_g1_i15	6	#N/A	NA	NA	Chromosome segregation ATPase
TRINITY_DN6118_c0_g1_i71	7	#N/A	K07127	uraH, pucM, hiuH	5-hydroxyisourate hydrolase (purine catabolism), transthyretin-related family
TRINITY_DN74_c0_g5_i1	7	#N/A	NA	NA	NA
TRINITY_DN7727_c0_g1_i26	7	#N/A	NA	NA	NA
TRINITY_DN12907_c0_g2_i4	7	#N/A	K02879	RP-L17, MRPL17, rplQ	Ribosomal protein L17
TRINITY_DN93_c0_g1_i17	7	#N/A	NA	NA	NA
TRINITY_DN2943_c0_g1_i24	7	#N/A	K01133	betC	Arylsulfatase A or related enzyme
TRINITY_DN307_c1_g1_i23	7	#N/A	K21053	ade	Adenosine deaminase
TRINITY_DN1418_c0_g1_i22	7	#N/A	K16681	CRB	NA
TRINITY_DN7202_c0_g1_i19	6	#N/A	K00015	gyaR, GOR1	Lactate dehydrogenase or related 2-hydroxyacid dehydrogenase
TRINITY_DN5060_c0_g1_i23	7	#N/A	K05521	draG	ADP-ribosylglycohydrolase
TRINITY_DN4439_c0_g2_i1	7	#N/A	NA	NA	Glycine cleavage system T protein (aminomethyltransferase)
TRINITY_DN7727_c0_g1_i99	6	#N/A	NA	NA	Ankyrin repeat
TRINITY_DN1382_c0_g1_i1	7	#N/A	NA	NA	Pimeloyl-ACP methyl ester carboxylesterase
TRINITY_DN1895_c0_g1_i152	7	#N/A	K01869	LARS, leuS	Leucyl-tRNA synthetase
TRINITY_DN1611_c0_g1_i23	7	#N/A	K03637	moaC, CNX3	Molybdenum cofactor biosynthesis enzyme
TRINITY_DN18098_c0_g1_i6	7	#N/A	K02931	RP-L5, MRPL5, rplE	Ribosomal protein L5
TRINITY_DN5036_c0_g1_i20	7	#N/A	K12255	gbuA	Arginase family enzyme
TRINITY_DN1895_c0_g1_i94	7	#N/A	K01869	LARS, leuS	Leucyl-tRNA synthetase
TRINITY_DN1450_c0_g1_i7	7	#N/A	NA	NA	NA
TRINITY_DN3963_c0_g2_i1	7	#N/A	K02886	RP-L2, MRPL2, rplB	Ribosomal protein L2
TRINITY_DN3007_c0_g1_i2	4	#N/A	NA	NA	Chromosome segregation ATPase
TRINITY_DN3460_c0_g1_i5	4	#N/A	K02437	gcvH, GCSH	Glycine cleavage system H protein (lipoate-binding)
TRINITY_DN5036_c0_g1_i10	7	#N/A	K12255	gbuA	Arginase family enzyme
TRINITY_DN2943_c0_g1_i11	4	#N/A	K01133	betC	Arylsulfatase A or related enzyme
TRINITY_DN12907_c0_g1_i1	7	#N/A	K03046	rpoC	NA
TRINITY_DN13688_c0_g3_i3	7	#N/A	K02935	RP-L7, MRPL12, rplL	Ribosomal protein L7/L12
TRINITY_DN4401_c0_g2_i2	7	#N/A	K02261	COX2	Heme/copper-type cytochrome/quinol oxidase, subunit 2
TRINITY_DN2011_c0_g1_i4	7	#N/A	K07305	msrB	Peptide methionine sulfoxide reductase MsrB
TRINITY_DN182_c2_g1_i2	7	#N/A	NA	NA	NA
TRINITY_DN3460_c0_g1_i9	6	#N/A	K02437	gcvH, GCSH	Glycine cleavage system H protein (lipoate-binding)
TRINITY_DN2011_c0_g1_i3	6	#N/A	K07305	msrB	Peptide methionine sulfoxide reductase MsrB
TRINITY_DN1066_c0_g2_i58	7	#N/A	K00626	ACAT, atoB	Acetyl-CoA acetyltransferase
TRINITY_DN20125_c1_g2_i1	7	#N/A	K03073	secE	Preprotein translocase subunit SecE
TRINITY_DN4_c0_g1_i76	4	#N/A	K01787	RENBP	Mannose or cellobiose epimerase, N-acyl-D-glucosamine 2-epimerase family
TRINITY_DN60921_c0_g1_i1	7	#N/A	K04077	groEL, HSPD1	Chaperonin GroEL (HSP60 family)
TRINITY_DN3460_c0_g1_i31	7	#N/A	K02437	gcvH, GCSH	Glycine cleavage system H protein (lipoate-binding)
TRINITY_DN18098_c0_g1_i10	7	#N/A	K02994	RP-S8, rpsH	Ribosomal protein S8
TRINITY_DN4401_c0_g1_i3	7	#N/A	K02261	COX2	Heme/copper-type cytochrome/quinol oxidase, subunit 2
TRINITY_DN24691_c0_g2_i1	7	#N/A	K02952	RP-S13, rpsM	Ribosomal protein S13
TRINITY_DN4130_c0_g1_i25	4	GO:0055085	K08720	ompU	NA
TRINITY_DN5222_c0_g1_i2	6	#N/A	K00135	gabD	Acyl-CoA reductase or other NAD-dependent aldehyde dehydrogenase
TRINITY_DN4401_c0_g2_i1	7	#N/A	K02261	COX2	Heme/copper-type cytochrome/quinol oxidase, subunit 2
TRINITY_DN30777_c0_g3_i6	7	#N/A	K02712	psbK	NA
TRINITY_DN5548_c0_g1_i1	7	#N/A	K03671	trxA	Negative regulator of GroEL, contains thioredoxin-like and TPR-like domains
TRINITY_DN1895_c0_g1_i133	1	#N/A	K01869	LARS, leuS	Leucyl-tRNA synthetase
TRINITY_DN22480_c1_g2_i1	7	#N/A	K02108	ATPF0A, atpB	FoF1-type ATP synthase, membrane subunit a
TRINITY_DN356_c0_g1_i44	7	#N/A	K18335	K18335	NAD(P)-dependent dehydrogenase, short-chain alcohol dehydrogenase family
TRINITY_DN11626_c0_g1_i1	7	#N/A	K02965	RP-S19, rpsS	Ribosomal protein S19
TRINITY_DN4_c0_g1_i24	6	#N/A	K01787	RENBP	Mannose or cellobiose epimerase, N-acyl-D-glucosamine 2-epimerase family
TRINITY_DN3963_c0_g1_i1	7	#N/A	K02965	RP-S19, rpsS	Ribosomal protein S19
TRINITY_DN7486_c0_g1_i1	5	#N/A	#N/A	#N/A	#N/A
TRINITY_DN94711_c0_g1_i1	7	#N/A	K01868	TARS, thrS	Threonyl-tRNA synthetase
TRINITY_DN15516_c0_g2_i2	7	#N/A	K02954	RP-S14, MRPS14, rpsN	Ribosomal protein S14
TRINITY_DN1066_c0_g2_i51	6	#N/A	NA	NA	Acetyl-CoA acetyltransferase
TRINITY_DN75719_c0_g1_i1	7	#N/A	K02884	RP-L19, MRPL19, rplS	Ribosomal protein L19
TRINITY_DN33071_c0_g1_i1	7	#N/A	K02992	RP-S7, MRPS7, rpsG	Ribosomal protein S7
TRINITY_DN3495_c0_g4_i1	6	#N/A	K21624	c3lhypd	L-alanine-DL-glutamate epimerase or related enzyme of enolase superfamily
TRINITY_DN27062_c0_g1_i1	7	#N/A	K02863	RP-L1, MRPL1, rplA	Ribosomal protein L1
TRINITY_DN4_c0_g1_i23	7	#N/A	K01787	RENBP	Mannose or cellobiose epimerase, N-acyl-D-glucosamine 2-epimerase family
TRINITY_DN1895_c0_g1_i178	7	#N/A	K01869	LARS, leuS	Leucyl-tRNA synthetase
TRINITY_DN39814_c0_g2_i2	7	#N/A	K00015	gyaR, GOR1	Lactate dehydrogenase or related 2-hydroxyacid dehydrogenase
TRINITY_DN14967_c0_g1_i2	7	#N/A	K02909	RP-L31, rpmE	Ribosomal protein L31
TRINITY_DN132965_c0_g1_i1	7	#N/A	K04077	groEL, HSPD1	Chaperonin GroEL (HSP60 family)
TRINITY_DN5036_c0_g1_i14	6	#N/A	K12255	gbuA	Arginase family enzyme
TRINITY_DN6241_c0_g1_i14	7	#N/A	NA	NA	NA
TRINITY_DN23320_c0_g1_i1	7	#N/A	K02878	RP-L16, MRPL16, rplP	Ribosomal protein L16/L10AE
TRINITY_DN136602_c0_g1_i1	7	#N/A	K02871	RP-L13, MRPL13, rplM	Ribosomal protein L13
TRINITY_DN121982_c0_g1_i1	7	#N/A	K04043	dnaK, HSPA9	Molecular chaperone DnaK (HSP70)
TRINITY_DN25453_c0_g2_i1	7	#N/A	NA	NA	NADH:ubiquinone oxidoreductase subunit 5 (chain L)/Multisubunit Na+/H+ antiporter, MnhA subunit
TRINITY_DN1611_c0_g1_i7	6	#N/A	K03637	moaC, CNX3	Molybdenum cofactor biosynthesis enzyme
TRINITY_DN1611_c0_g1_i24	4	#N/A	K03637	moaC, CNX3	Molybdenum cofactor biosynthesis enzyme
TRINITY_DN468_c0_g1_i7	5	#N/A	#N/A	#N/A	#N/A
TRINITY_DN18098_c1_g1_i1	7	#N/A	K02988	RP-S5, MRPS5, rpsE	NA
TRINITY_DN4439_c0_g2_i5	6	#N/A	NA	NA	Glycine cleavage system T protein (aminomethyltransferase)
TRINITY_DN9340_c0_g1_i1	4	#N/A	K01997	livH	Branched-chain amino acid ABC-type transport system, permease component
TRINITY_DN18098_c1_g2_i2	7	#N/A	K03076	secY	Preprotein translocase subunit SecY
TRINITY_DN16460_c0_g1_i6	7	#N/A	K01876	DARS2, aspS	Aspartyl-tRNA synthetase
TRINITY_DN13688_c0_g1_i6	7	#N/A	K02935	RP-L7, MRPL12, rplL	Ribosomal protein L7/L12
TRINITY_DN468_c0_g1_i8	3	GO:0000122	#N/A	#N/A	#N/A
TRINITY_DN468_c0_g1_i6	5	GO:0030435	#N/A	#N/A	#N/A
TRINITY_DN35078_c1_g1_i1	7	#N/A	K02967	RP-S2, MRPS2, rpsB	Ribosomal protein S2
TRINITY_DN22480_c1_g2_i2	7	#N/A	K02108	ATPF0A, atpB	FoF1-type ATP synthase, membrane subunit a
TRINITY_DN24042_c0_g1_i32	4	#N/A	NA	NA	NA
TRINITY_DN118163_c0_g1_i1	7	#N/A	K02834	rbfA	Ribosome-binding factor A
TRINITY_DN1895_c0_g1_i200	5	#N/A	K01869	LARS, leuS	Leucyl-tRNA synthetase
TRINITY_DN1445_c3_g1_i11	7	#N/A	K01609	trpC	Indole-3-glycerol phosphate synthase
TRINITY_DN1918_c0_g1_i3	6	#N/A	#N/A	#N/A	#N/A
TRINITY_DN105491_c0_g1_i1	7	#N/A	K02887	RP-L20, MRPL20, rplT	Ribosomal protein L20
TRINITY_DN18098_c0_g1_i2	7	#N/A	K02994	RP-S8, rpsH	Ribosomal protein S8
TRINITY_DN1936_c1_g1_i2	7	#N/A	K02355	fusA, GFM, EFG	Translation elongation factor EF-G, a GTPase
TRINITY_DN3782_c0_g1_i2	7	GO:0006221	NA	NA	NA
TRINITY_DN1936_c1_g1_i1	7	#N/A	K02355	fusA, GFM, EFG	Translation elongation factor EF-G, a GTPase
TRINITY_DN12389_c0_g2_i2	7	#N/A	K00332	nuoC	NADH:ubiquinone oxidoreductase 27 kD subunit (chain C)
TRINITY_DN25453_c1_g2_i1	7	#N/A	K03935	NDUFS2	NADH:ubiquinone oxidoreductase 49 kD subunit (chain D)
TRINITY_DN89392_c0_g1_i1	6	#N/A	K03040	rpoA	DNA-directed RNA polymerase, alpha subunit/40 kD subunit
TRINITY_DN975_c0_g1_i4	4	#N/A	K09969	aapJ, bztA	ABC-type amino acid transport/signal transduction system, periplasmic component/domain
TRINITY_DN4439_c0_g2_i2	4	#N/A	NA	NA	Glycine cleavage system T protein (aminomethyltransferase)
TRINITY_DN7727_c0_g1_i18	4	#N/A	NA	NA	NA
TRINITY_DN38738_c0_g1_i15	6	#N/A	NA	NA	Acyl-CoA synthetase (AMP-forming)/AMP-acid ligase II
TRINITY_DN104355_c0_g1_i1	7	#N/A	K02988	RP-S5, MRPS5, rpsE	Ribosomal protein S5
TRINITY_DN13688_c0_g1_i3	7	#N/A	K02935	RP-L7, MRPL12, rplL	Ribosomal protein L7/L12
TRINITY_DN12907_c0_g2_i1	1	#N/A	K02879	RP-L17, MRPL17, rplQ	Ribosomal protein L17
TRINITY_DN3460_c0_g1_i22	4	#N/A	K02437	gcvH, GCSH	Glycine cleavage system H protein (lipoate-binding)
TRINITY_DN56875_c0_g1_i1	7	#N/A	K02899	RP-L27, MRPL27, rpmA	Ribosomal protein L27
TRINITY_DN5036_c0_g1_i11	7	#N/A	K12255	gbuA	Arginase family enzyme
TRINITY_DN10818_c0_g1_i10	7	#N/A	K01488	add, ADA	Adenosine deaminase
TRINITY_DN43270_c0_g2_i1	7	#N/A	K03696	clpC	ATP-dependent Clp protease ATP-binding subunit ClpA
TRINITY_DN18098_c0_g1_i8	7	#N/A	K02982	RP-S3, rpsC	Ribosomal protein S3
TRINITY_DN5036_c0_g1_i12	7	#N/A	K12255	gbuA	Arginase family enzyme
TRINITY_DN5921_c0_g1_i11	3	#N/A	#N/A	#N/A	#N/A
TRINITY_DN55230_c0_g1_i1	3	#N/A	NA	NA	ABC-type branched-chain amino acid transport system, periplasmic component
TRINITY_DN9535_c0_g1_i15	6	GO:0019605	NA	NA	NA
TRINITY_DN1918_c0_g1_i1	6	#N/A	#N/A	#N/A	#N/A
TRINITY_DN66764_c0_g1_i1	7	#N/A	K02967	RP-S2, MRPS2, rpsB	Ribosomal protein S2
TRINITY_DN43263_c0_g1_i1	7	#N/A	K02884	RP-L19, MRPL19, rplS	Ribosomal protein L19
TRINITY_DN61555_c0_g1_i1	7	#N/A	K06916	zapE	Predicted ATPase
TRINITY_DN9571_c0_g1_i1	6	#N/A	NA	NA	Methylmalonyl-CoA mutase, N-terminal domain/subunit
TRINITY_DN23499_c0_g1_i1	7	#N/A	K02913	RP-L33, MRPL33, rpmG	Ribosomal protein L33
TRINITY_DN8077_c0_g1_i4	7	#N/A	K02358	tuf, TUFM	Translation elongation factor EF-Tu, a GTPase
TRINITY_DN56820_c0_g1_i2	7	#N/A	K03043	rpoB	DNA-directed RNA polymerase, beta subunit/140 kD subunit
TRINITY_DN27502_c0_g1_i3	7	#N/A	K09969	aapJ, bztA	ABC-type amino acid transport/signal transduction system, periplasmic component/domain
TRINITY_DN4747_c0_g1_i23	7	#N/A	K01885	EARS, gltX	Glutamyl- or glutaminyl-tRNA synthetase
TRINITY_DN468_c0_g1_i9	5	GO:0030683	#N/A	#N/A	#N/A
TRINITY_DN3782_c0_g1_i34	4	GO:0006221	NA	NA	NA
TRINITY_DN9005_c0_g1_i1	6	#N/A	K03283	HSPA1s	Molecular chaperone DnaK (HSP70)
TRINITY_DN8822_c0_g1_i17	6	#N/A	K02002	proX	ABC-type proline/glycine betaine transport system, periplasmic component
TRINITY_DN22665_c0_g1_i2	6	#N/A	NA	NA	TRAP-type C4-dicarboxylate transport system, periplasmic component
TRINITY_DN75669_c0_g1_i1	7	#N/A	K03881	ND4	NADH:ubiquinone oxidoreductase subunit 4 (chain M)
TRINITY_DN134223_c0_g1_i1	7	#N/A	K09117	K09117	Uncharacterized conserved protein YqeY
TRINITY_DN132849_c0_g1_i1	7	#N/A	K00337	nuoH	NADH:ubiquinone oxidoreductase subunit 1 (chain H)
TRINITY_DN45606_c0_g1_i1	7	#N/A	K00134	GAPDH, gapA	Glyceraldehyde-3-phosphate dehydrogenase/erythrose-4-phosphate dehydrogenase
TRINITY_DN22119_c0_g1_i7	7	#N/A	K02355	fusA, GFM, EFG	Translation elongation factor EF-G, a GTPase
TRINITY_DN36051_c0_g3_i1	7	#N/A	K00337	nuoH	NADH:ubiquinone oxidoreductase subunit 1 (chain H)
TRINITY_DN33071_c0_g3_i1	7	#N/A	K02950	RP-S12, MRPS12, rpsL	Ribosomal protein S12
TRINITY_DN54899_c0_g1_i1	7	#N/A	K02963	RP-S18, MRPS18, rpsR	Ribosomal protein S18
TRINITY_DN8210_c0_g1_i11	3	#N/A	NA	NA	TRAP-type mannitol/chloroaromatic compound transport system, periplasmic component
TRINITY_DN4528_c0_g1_i1	7	GO:0010212	#N/A	#N/A	#N/A
TRINITY_DN4130_c0_g1_i19	5	GO:0055085	K08720	ompU	Outer membrane protein (porin)
TRINITY_DN25150_c0_g1_i2	6	#N/A	K01142	E3.1.11.2, xthA	Exonuclease III
TRINITY_DN5875_c0_g1_i7	6	#N/A	K03310	TC.AGCS	Na+/alanine symporter
TRINITY_DN8831_c0_g1_i1	6	#N/A	K01999	livK	ABC-type branched-chain amino acid transport system, periplasmic component
TRINITY_DN106066_c0_g1_i1	7	#N/A	K00962	pnp, PNPT1	Polyribonucleotide nucleotidyltransferase (polynucleotide phosphorylase)
TRINITY_DN12389_c0_g1_i1	7	#N/A	K00332	nuoC	NADH:ubiquinone oxidoreductase 27 kD subunit (chain C)
TRINITY_DN24691_c0_g1_i1	7	#N/A	K02919	RP-L36, MRPL36, rpmJ	Ribosomal protein L36
TRINITY_DN28340_c0_g1_i2	7	#N/A	K03043	rpoB	DNA-directed RNA polymerase, beta subunit/140 kD subunit
TRINITY_DN54281_c1_g2_i1	7	#N/A	K04077	groEL, HSPD1	Chaperonin GroEL (HSP60 family)
TRINITY_DN48174_c0_g2_i1	7	#N/A	K04077	groEL, HSPD1	Chaperonin GroEL (HSP60 family)
TRINITY_DN16294_c0_g2_i1	7	#N/A	K02986	RP-S4, rpsD	Ribosomal protein S4 or related protein
TRINITY_DN54043_c0_g1_i2	7	#N/A	K02939	RP-L9, MRPL9, rplI	Ribosomal protein L9
TRINITY_DN41390_c0_g1_i3	7	#N/A	K02112	ATPF1B, atpD	FoF1-type ATP synthase, beta subunit
TRINITY_DN12389_c1_g1_i1	7	#N/A	K00343	nuoN	NADH:ubiquinone oxidoreductase subunit 2 (chain N)
TRINITY_DN59789_c0_g2_i1	6	#N/A	K02111	ATPF1A, atpA	FoF1-type ATP synthase, alpha subunit
TRINITY_DN6523_c0_g1_i9	6	#N/A	K06168	miaB	tRNA A37 methylthiotransferase MiaB
TRINITY_DN7727_c0_g1_i45	1	#N/A	NA	NA	NA
TRINITY_DN5709_c0_g1_i4	7	GO:0033147	#N/A	#N/A	#N/A
TRINITY_DN14967_c0_g1_i1	7	#N/A	K02909	RP-L31, rpmE	Ribosomal protein L31
TRINITY_DN2365_c0_g1_i19	5	#N/A	NA	NA	Predicted ATPase
TRINITY_DN20492_c1_g2_i1	7	#N/A	K02520	infC, MTIF3	Translation initiation factor IF-3
TRINITY_DN3963_c0_g1_i2	7	#N/A	K02906	RP-L3, MRPL3, rplC	Ribosomal protein L3
TRINITY_DN23130_c0_g1_i8	6	#N/A	K10553	frcC	NA
TRINITY_DN468_c0_g1_i2	5	GO:0030683	#N/A	#N/A	#N/A
TRINITY_DN4528_c0_g1_i14	5	GO:0071902	#N/A	#N/A	#N/A
TRINITY_DN45406_c0_g1_i2	7	#N/A	K02867	RP-L11, MRPL11, rplK	Ribosomal protein L11
TRINITY_DN105235_c0_g1_i1	1	#N/A	K03555	mutS	DNA mismatch repair ATPase MutS
TRINITY_DN6288_c0_g1_i1	6	#N/A	K10544	xylH	ABC-type xylose transport system, permease component
TRINITY_DN10640_c0_g1_i1	6	#N/A	K04077	groEL, HSPD1	Chaperonin GroEL (HSP60 family)
TRINITY_DN55352_c0_g1_i1	3	#N/A	K03782	katG	Catalase (peroxidase I)
TRINITY_DN33912_c0_g4_i1	3	#N/A	K02358	tuf, TUFM	Translation elongation factor EF-Tu, a GTPase
TRINITY_DN21273_c0_g1_i1	6	#N/A	K10227	smoE, mtlE	ABC-type glycerol-3-phosphate transport system, periplasmic component
TRINITY_DN75645_c0_g1_i1	7	#N/A	NA	NA	Tetratricopeptide (TPR) repeat
TRINITY_DN36625_c0_g4_i1	6	#N/A	K02355	fusA, GFM, EFG	Translation elongation factor EF-G, a GTPase
TRINITY_DN120099_c0_g1_i1	7	#N/A	K02887	RP-L20, MRPL20, rplT	Ribosomal protein L20
TRINITY_DN119074_c0_g1_i1	7	#N/A	K02358	tuf, TUFM	Translation elongation factor EF-Tu, a GTPase
TRINITY_DN108323_c0_g1_i1	7	#N/A	K01867	WARS, trpS	Tryptophanyl-tRNA synthetase
TRINITY_DN59075_c0_g1_i1	7	#N/A	K09458	fabF, OXSM, CEM1	3-oxoacyl-(acyl-carrier-protein) synthase
TRINITY_DN92066_c0_g1_i1	7	#N/A	K02871	RP-L13, MRPL13, rplM	Ribosomal protein L13
TRINITY_DN43928_c0_g1_i1	7	#N/A	K02886	RP-L2, MRPL2, rplB	Ribosomal protein L2
TRINITY_DN20641_c0_g3_i1	7	#N/A	K05788	ihfB, himD	Bacterial nucleoid DNA-binding protein
TRINITY_DN52415_c0_g1_i1	6	#N/A	K02886	RP-L2, MRPL2, rplB	Ribosomal protein L2
TRINITY_DN49836_c0_g1_i1	6	#N/A	K04043	dnaK, HSPA9	Molecular chaperone DnaK (HSP70)
TRINITY_DN16963_c0_g1_i11	4	#N/A	K11688	dctP	TRAP-type C4-dicarboxylate transport system, periplasmic component
TRINITY_DN47548_c0_g1_i1	7	GO:0046718	#N/A	#N/A	#N/A
TRINITY_DN60747_c0_g1_i1	7	#N/A	K03696	clpC	ATP-dependent Clp protease ATP-binding subunit ClpA
TRINITY_DN5036_c0_g1_i17	7	#N/A	K12255	gbuA	Arginase family enzyme
TRINITY_DN468_c0_g1_i5	4	GO:0046718	#N/A	#N/A	#N/A
TRINITY_DN18098_c0_g1_i4	7	#N/A	K02904	RP-L29, rpmC	Ribosomal protein L29
TRINITY_DN4_c0_g1_i77	6	#N/A	K01787	RENBP	Mannose or cellobiose epimerase, N-acyl-D-glucosamine 2-epimerase family
TRINITY_DN54281_c1_g1_i2	7	#N/A	K04077	groEL, HSPD1	Chaperonin GroEL (HSP60 family)
TRINITY_DN10578_c0_g1_i2	7	GO:1902895	#N/A	#N/A	#N/A
TRINITY_DN21869_c0_g2_i2	6	#N/A	K10232	aglE, ggtB	ABC-type glycerol-3-phosphate transport system, periplasmic component
TRINITY_DN21869_c0_g2_i5	4	#N/A	K10232	aglE, ggtB	ABC-type glycerol-3-phosphate transport system, periplasmic component
TRINITY_DN16294_c0_g1_i2	7	#N/A	K02986	RP-S4, rpsD	Ribosomal protein S4 or related protein
TRINITY_DN3782_c0_g1_i25	7	GO:0006689	NA	NA	NA
TRINITY_DN5036_c0_g1_i8	7	#N/A	K12255	gbuA	Arginase family enzyme
TRINITY_DN7202_c0_g1_i7	5	#N/A	K00015	gyaR, GOR1	Lactate dehydrogenase or related 2-hydroxyacid dehydrogenase
TRINITY_DN13519_c0_g2_i1	6	#N/A	K15551	tauA	ABC-type taurine transport system, periplasmic component
TRINITY_DN10640_c0_g3_i1	5	#N/A	K04077	groEL, HSPD1	Chaperonin GroEL (HSP60 family)
TRINITY_DN10644_c0_g1_i8	7	#N/A	K02358	tuf, TUFM	Translation elongation factor EF-Tu, a GTPase
TRINITY_DN78833_c0_g1_i1	6	#N/A	K06890	K06890	Integral membrane protein, interacts with FtsH
TRINITY_DN32067_c0_g1_i1	6	#N/A	K06942	ychF	Ribosome-binding ATPase YchF, GTP1/OBG family
TRINITY_DN38176_c0_g1_i1	7	#N/A	K02935	RP-L7, MRPL12, rplL	Ribosomal protein L7/L12
TRINITY_DN120350_c0_g1_i1	7	#N/A	K02926	RP-L4, MRPL4, rplD	Ribosomal protein L4
TRINITY_DN121643_c0_g1_i1	7	#N/A	K02988	RP-S5, MRPS5, rpsE	Ribosomal protein S5
TRINITY_DN7261_c0_g1_i1	3	#N/A	NA	NA	Uncharacterized membrane protein
TRINITY_DN127116_c0_g1_i1	7	#N/A	K03046	rpoC	DNA-directed RNA polymerase, beta' subunit/160 kD subunit
TRINITY_DN105145_c0_g1_i1	7	#N/A	K02433	gatA, QRSL1	Asp-tRNAAsn/Glu-tRNAGln amidotransferase A subunit or related amidase
TRINITY_DN126770_c0_g1_i1	7	#N/A	K01890	FARSB, pheT	Phenylalanyl-tRNA synthetase beta subunit
TRINITY_DN23853_c0_g1_i1	7	#N/A	K02112	ATPF1B, atpD	FoF1-type ATP synthase, beta subunit
TRINITY_DN76005_c0_g1_i1	7	#N/A	K05788	ihfB, himD	Bacterial nucleoid DNA-binding protein
TRINITY_DN94732_c0_g1_i1	6	#N/A	K02112	ATPF1B, atpD	FoF1-type ATP synthase, beta subunit
TRINITY_DN43928_c0_g2_i1	7	#N/A	K02982	RP-S3, rpsC	Ribosomal protein S3
TRINITY_DN27399_c0_g1_i1	2	#N/A	NA	NA	Molecular chaperone DnaK (HSP70)
TRINITY_DN20617_c0_g2_i1	7	#N/A	K03881	ND4	NADH:ubiquinone oxidoreductase subunit 4 (chain M)
TRINITY_DN96925_c0_g1_i1	7	#N/A	K00162	PDHB, pdhB	Pyruvate/2-oxoglutarate/acetoin dehydrogenase complex, dehydrogenase (E1) component
TRINITY_DN53068_c0_g1_i1	7	#N/A	K02884	RP-L19, MRPL19, rplS	Ribosomal protein L19
TRINITY_DN2350_c0_g3_i2	1	#N/A	K02640	petG	NA
TRINITY_DN62507_c0_g1_i1	7	#N/A	K00150	gap2	Glyceraldehyde-3-phosphate dehydrogenase/erythrose-4-phosphate dehydrogenase
TRINITY_DN56625_c0_g1_i1	7	#N/A	K02519	infB, MTIF2	GTP-binding protein EngB required for normal cell division
TRINITY_DN15456_c0_g1_i1	7	#N/A	K02874	RP-L14, MRPL14, rplN	Ribosomal protein L14
TRINITY_DN40735_c0_g2_i1	7	#N/A	NA	NA	NADH:ubiquinone oxidoreductase subunit 2 (chain N)
TRINITY_DN40746_c0_g1_i1	7	#N/A	K03043	rpoB	DNA-directed RNA polymerase, beta subunit/140 kD subunit
TRINITY_DN43594_c0_g1_i1	7	#N/A	K03086	rpoD	DNA-directed RNA polymerase, sigma subunit (sigma70/sigma32)
TRINITY_DN91176_c0_g1_i1	6	#N/A	K07335	bmpA, bmpB, tmpC	Basic membrane lipoprotein Med, periplasmic binding protein (PBP1-ABC) superfamily
TRINITY_DN91181_c0_g1_i1	7	#N/A	K01689	ENO, eno	Enolase
TRINITY_DN28409_c0_g1_i1	7	#N/A	K02357	tsf, TSFM	Translation elongation factor EF-Ts
TRINITY_DN20125_c0_g3_i1	7	#N/A	K02358	tuf, TUFM	Translation elongation factor EF-Tu, a GTPase
TRINITY_DN42241_c0_g1_i2	7	#N/A	K00339	nuoJ	NADH:ubiquinone oxidoreductase subunit 6 (chain J)
TRINITY_DN67972_c0_g1_i1	7	#N/A	NA	NA	Uncharacterized protein YjbI, contains pentapeptide repeats
TRINITY_DN24691_c0_g1_i2	7	#N/A	K02919	RP-L36, MRPL36, rpmJ	Ribosomal protein L36
TRINITY_DN18428_c0_g1_i2	7	GO:0046740	#N/A	#N/A	#N/A
TRINITY_DN3782_c0_g1_i21	4	GO:0019856	#N/A	#N/A	#N/A
TRINITY_DN20380_c1_g1_i1	4	GO:0010951	#N/A	#N/A	#N/A
TRINITY_DN13519_c0_g2_i5	4	#N/A	K15551	tauA	ABC-type taurine transport system, periplasmic component
TRINITY_DN54281_c0_g1_i2	7	#N/A	K04078	groES, HSPE1	Co-chaperonin GroES (HSP10)
TRINITY_DN17219_c0_g1_i4	6	#N/A	K07335	bmpA, bmpB, tmpC	Basic membrane lipoprotein Med, periplasmic binding protein (PBP1-ABC) superfamily
TRINITY_DN2577_c0_g1_i4	4	#N/A	NA	NA	Choline dehydrogenase or related flavoprotein
TRINITY_DN16989_c0_g1_i6	7	#N/A	K04043	dnaK, HSPA9	Molecular chaperone DnaK (HSP70)
TRINITY_DN93_c1_g1_i27	5	#N/A	NA	NA	NA
TRINITY_DN39400_c0_g1_i10	7	GO:0046718	#N/A	#N/A	#N/A
TRINITY_DN15885_c0_g1_i4	6	#N/A	K02035	ABC.PE.S	ABC-type transport system, periplasmic component
TRINITY_DN975_c0_g1_i3	4	#N/A	K09969	aapJ, bztA	NA
TRINITY_DN5883_c0_g1_i1	6	#N/A	K04077	groEL, HSPD1	Chaperonin GroEL (HSP60 family)
TRINITY_DN468_c0_g1_i14	1	GO:0046740	#N/A	#N/A	#N/A
TRINITY_DN76978_c0_g1_i1	7	#N/A	K02111	ATPF1A, atpA	FoF1-type ATP synthase, alpha subunit
TRINITY_DN20184_c1_g2_i1	5	GO:0006094	NA	NA	NA
TRINITY_DN9225_c0_g1_i1	4	GO:0015888	K02027	ABC.MS.S	NA
TRINITY_DN39236_c0_g1_i1	7	GO:0043163	NA	NA	Invasion protein IalB, involved in pathogenesis
TRINITY_DN32205_c0_g1_i1	7	#N/A	K00281	GLDC, gcvP	Glycine cleavage system protein P (pyridoxal-binding), N-terminal domain
TRINITY_DN90916_c0_g1_i1	7	#N/A	K03076	secY	Preprotein translocase subunit SecY
TRINITY_DN30756_c0_g1_i1	4	#N/A	K02027	ABC.MS.S	ABC-type glycerol-3-phosphate transport system, periplasmic component
TRINITY_DN41318_c0_g1_i2	7	#N/A	K04077	groEL, HSPD1	Chaperonin GroEL (HSP60 family)
TRINITY_DN19583_c0_g1_i1	4	#N/A	K00973	rfbA, rmlA, rffH	dTDP-glucose pyrophosphorylase
TRINITY_DN975_c0_g1_i2	5	#N/A	K09969	aapJ, bztA	ABC-type amino acid transport/signal transduction system, periplasmic component/domain
TRINITY_DN53716_c0_g2_i1	6	#N/A	K02878	RP-L16, MRPL16, rplP	Ribosomal protein L16/L10AE
TRINITY_DN24469_c0_g1_i15	4	GO:0010951	#N/A	#N/A	#N/A
TRINITY_DN105636_c0_g1_i1	3	#N/A	K10232	aglE, ggtB	ABC-type glycerol-3-phosphate transport system, periplasmic component
TRINITY_DN20456_c0_g1_i1	1	#N/A	K00337	nuoH	NADH:ubiquinone oxidoreductase subunit 1 (chain H)
TRINITY_DN30735_c1_g1_i2	7	#N/A	K02982	RP-S3, rpsC	Ribosomal protein S3
TRINITY_DN59374_c0_g1_i1	1	#N/A	K02355	fusA, GFM, EFG	Translation elongation factor EF-G, a GTPase
TRINITY_DN34945_c0_g1_i1	6	#N/A	K03040	rpoA	DNA-directed RNA polymerase, alpha subunit/40 kD subunit
TRINITY_DN53716_c0_g1_i1	7	#N/A	K02878	RP-L16, MRPL16, rplP	Ribosomal protein L16/L10AE
TRINITY_DN28552_c0_g3_i1	6	#N/A	K02358	tuf, TUFM	Translation elongation factor EF-Tu, a GTPase
TRINITY_DN121191_c0_g1_i1	7	#N/A	K04077	groEL, HSPD1	Chaperonin GroEL (HSP60 family)
TRINITY_DN138432_c0_g1_i1	7	#N/A	K02111	ATPF1A, atpA	FoF1-type ATP synthase, alpha subunit
TRINITY_DN118377_c0_g1_i1	7	#N/A	K02078	acpP	Acyl carrier protein
TRINITY_DN136374_c0_g1_i1	7	#N/A	K06204	dksA	RNA polymerase-binding transcription factor DksA
TRINITY_DN120987_c0_g1_i1	7	#N/A	K04043	dnaK, HSPA9	Molecular chaperone DnaK (HSP70)
TRINITY_DN120703_c0_g1_i1	7	#N/A	K02876	RP-L15, MRPL15, rplO	Ribosomal protein L15
TRINITY_DN134588_c0_g1_i1	7	#N/A	K01599	hemE, UROD	Uroporphyrinogen-III decarboxylase
TRINITY_DN109097_c0_g1_i1	7	#N/A	K02863	RP-L1, MRPL1, rplA	Ribosomal protein L1
TRINITY_DN119432_c0_g1_i1	7	#N/A	K03086	rpoD	DNA-directed RNA polymerase, sigma subunit (sigma70/sigma32)
TRINITY_DN55129_c0_g1_i1	7	#N/A	K03046	rpoC	DNA-directed RNA polymerase, beta' subunit/160 kD subunit
TRINITY_DN91478_c0_g1_i1	7	#N/A	K00962	pnp, PNPT1	Polyribonucleotide nucleotidyltransferase (polynucleotide phosphorylase)
TRINITY_DN59004_c0_g1_i1	7	#N/A	K02950	RP-S12, MRPS12, rpsL	Ribosomal protein S12
TRINITY_DN39576_c0_g1_i1	7	#N/A	K02358	tuf, TUFM	Translation elongation factor EF-Tu, a GTPase
TRINITY_DN71404_c0_g1_i1	7	#N/A	K05573	ndhB	NADH:ubiquinone oxidoreductase subunit 2 (chain N)
TRINITY_DN67199_c0_g1_i1	2	#N/A	K04043	dnaK, HSPA9	Molecular chaperone DnaK (HSP70)
TRINITY_DN63411_c0_g1_i1	7	#N/A	K02519	infB, MTIF2	Translation initiation factor IF-2, a GTPase
TRINITY_DN38166_c0_g1_i1	7	#N/A	K00150	gap2	Glyceraldehyde-3-phosphate dehydrogenase/erythrose-4-phosphate dehydrogenase
TRINITY_DN20617_c0_g1_i1	6	#N/A	NA	NA	NADH:ubiquinone oxidoreductase subunit 4 (chain M)
TRINITY_DN76381_c0_g1_i1	7	#N/A	K03043	rpoB	DNA-directed RNA polymerase, beta subunit/140 kD subunit
TRINITY_DN76626_c0_g1_i1	6	#N/A	K03076	secY	Preprotein translocase subunit SecY
TRINITY_DN9571_c0_g1_i11	7	#N/A	NA	NA	Methylmalonyl-CoA mutase, N-terminal domain/subunit
TRINITY_DN25453_c0_g1_i1	7	#N/A	K03884	ND6	NADH:ubiquinone oxidoreductase subunit 6 (chain J)
TRINITY_DN10348_c0_g2_i9	1	#N/A	K02355	fusA, GFM, EFG	Translation elongation factor EF-G, a GTPase
TRINITY_DN59865_c0_g1_i1	2	#N/A	K04043	dnaK, HSPA9	Molecular chaperone DnaK (HSP70)
TRINITY_DN74963_c0_g1_i1	7	#N/A	K09014	sufB	NA
TRINITY_DN75216_c0_g1_i1	6	#N/A	K00647	fabB	3-oxoacyl-(acyl-carrier-protein) synthase
TRINITY_DN77455_c0_g1_i1	7	#N/A	K03043	rpoB	DNA-directed RNA polymerase, beta subunit/140 kD subunit
TRINITY_DN43270_c0_g1_i2	7	#N/A	K03696	clpC	ATP-dependent Clp protease ATP-binding subunit ClpA
TRINITY_DN28756_c0_g1_i1	7	#N/A	K00962	pnp, PNPT1	Polyribonucleotide nucleotidyltransferase (polynucleotide phosphorylase)
TRINITY_DN89417_c0_g1_i1	4	#N/A	K03076	secY	Preprotein translocase subunit SecY
TRINITY_DN65875_c0_g1_i1	7	#N/A	K00858	ppnK, NADK	NA
TRINITY_DN90629_c0_g1_i1	7	#N/A	K02078	acpP	Acyl carrier protein
TRINITY_DN44123_c0_g1_i2	7	#N/A	K00789	metK	S-adenosylmethionine synthetase
TRINITY_DN63637_c0_g1_i1	7	#N/A	K11329	rpaB	DNA-binding response regulator, OmpR family, contains REC and winged-helix (wHTH) domain
TRINITY_DN8077_c1_g1_i1	7	#N/A	K02946	RP-S10, MRPS10, rpsJ	Ribosomal protein S10
TRINITY_DN60525_c0_g1_i1	7	#N/A	K00962	pnp, PNPT1	Polyribonucleotide nucleotidyltransferase (polynucleotide phosphorylase)
TRINITY_DN49663_c0_g1_i1	7	#N/A	K02111	ATPF1A, atpA	FoF1-type ATP synthase, alpha subunit
TRINITY_DN24644_c0_g1_i1	7	#N/A	K03046	rpoC	NA
TRINITY_DN25453_c1_g3_i1	7	#N/A	NA	NA	NADH:ubiquinone oxidoreductase 49 kD subunit (chain D)
TRINITY_DN5921_c0_g2_i3	7	#N/A	#N/A	#N/A	#N/A
TRINITY_DN32972_c0_g2_i2	7	GO:0046718	#N/A	#N/A	#N/A
TRINITY_DN4130_c0_g1_i27	6	GO:0006811	K08720	ompU	Outer membrane protein (porin)
TRINITY_DN8822_c0_g1_i15	6	#N/A	K02002	proX	ABC-type proline/glycine betaine transport system, periplasmic component
TRINITY_DN23130_c0_g1_i3	1	#N/A	K10552	frcB	ABC-type sugar transport system, periplasmic component, contains N-terminal xre family HTH domain
TRINITY_DN16294_c0_g1_i3	7	#N/A	K02986	RP-S4, rpsD	Ribosomal protein S4 or related protein
TRINITY_DN22119_c0_g1_i18	1	#N/A	K02358	tuf, TUFM	Translation elongation factor EF-Tu, a GTPase
TRINITY_DN2858_c0_g1_i6	5	#N/A	K03234	EEF2	Translation elongation factor EF-G, a GTPase
TRINITY_DN9347_c0_g1_i8	6	#N/A	NA	NA	ABC-type branched-chain amino acid transport system, periplasmic component
TRINITY_DN19938_c0_g1_i3	7	#N/A	K02935	RP-L7, MRPL12, rplL	Ribosomal protein L7/L12
TRINITY_DN19938_c0_g1_i2	7	#N/A	K02935	RP-L7, MRPL12, rplL	Ribosomal protein L7/L12
TRINITY_DN17219_c0_g1_i6	4	#N/A	K07335	bmpA, bmpB, tmpC	Basic membrane lipoprotein Med, periplasmic binding protein (PBP1-ABC) superfamily
TRINITY_DN54281_c0_g1_i1	6	#N/A	K04078	groES, HSPE1	Co-chaperonin GroES (HSP10)
TRINITY_DN4130_c0_g1_i11	3	#N/A	K08720	ompU	NA
TRINITY_DN43270_c0_g1_i3	7	#N/A	K03696	clpC	ATP-dependent Clp protease ATP-binding subunit ClpA
TRINITY_DN12729_c0_g1_i3	6	#N/A	K08311	nudH	8-oxo-dGTP pyrophosphatase MutT and related house-cleaning NTP pyrophosphohydrolases, NUDIX family
TRINITY_DN34530_c0_g4_i1	1	#N/A	K02935	RP-L7, MRPL12, rplL	Ribosomal protein L7/L12
TRINITY_DN9349_c2_g2_i3	1	#N/A	K02355	fusA, GFM, EFG	Translation elongation factor EF-G, a GTPase
TRINITY_DN89360_c0_g1_i1	1	#N/A	K04078	groES, HSPE1	Co-chaperonin GroES (HSP10)
TRINITY_DN35064_c0_g1_i1	3	#N/A	K02961	RP-S17, MRPS17, rpsQ	Ribosomal protein S17
TRINITY_DN54106_c0_g1_i1	1	#N/A	K02948	RP-S11, MRPS11, rpsK	Ribosomal protein S11
TRINITY_DN18260_c0_g1_i1	3	#N/A	NA	NA	NA
TRINITY_DN42754_c0_g1_i1	1	#N/A	K02907	RP-L30, MRPL30, rpmD	Ribosomal protein L30/L7E
TRINITY_DN48551_c0_g1_i1	1	#N/A	K02996	RP-S9, MRPS9, rpsI	NA
TRINITY_DN29097_c0_g1_i1	6	GO:0055085	K02002	proX	ABC-type proline/glycine betaine transport system, periplasmic component
TRINITY_DN468_c0_g1_i3	5	#N/A	#N/A	#N/A	#N/A
TRINITY_DN37005_c0_g1_i1	2	#N/A	K02945	RP-S1, rpsA	Ribosomal protein S1
TRINITY_DN59971_c0_g1_i1	1	#N/A	K02986	RP-S4, rpsD	Ribosomal protein S4 or related protein
TRINITY_DN34709_c0_g2_i1	1	#N/A	K02950	RP-S12, MRPS12, rpsL	Ribosomal protein S12
TRINITY_DN56939_c0_g1_i1	3	#N/A	K02952	RP-S13, rpsM	Ribosomal protein S13
TRINITY_DN17141_c0_g1_i1	5	#N/A	#N/A	#N/A	#N/A
TRINITY_DN16955_c0_g2_i3	6	#N/A	K02358	tuf, TUFM	Translation elongation factor EF-Tu, a GTPase
TRINITY_DN119783_c0_g1_i1	7	#N/A	K02919	RP-L36, MRPL36, rpmJ	Ribosomal protein L36
TRINITY_DN25236_c0_g2_i1	1	#N/A	K02112	ATPF1B, atpD	FoF1-type ATP synthase, beta subunit
TRINITY_DN55352_c0_g2_i1	5	#N/A	K03782	katG	Catalase (peroxidase I)
TRINITY_DN22696_c0_g1_i2	1	#N/A	K02939	RP-L9, MRPL9, rplI	Ribosomal protein L9
TRINITY_DN34945_c0_g1_i2	7	#N/A	K03040	rpoA	DNA-directed RNA polymerase, alpha subunit/40 kD subunit
TRINITY_DN24469_c0_g1_i19	6	GO:0010951	#N/A	#N/A	#N/A
TRINITY_DN43416_c0_g1_i1	6	#N/A	K04043	dnaK, HSPA9	Molecular chaperone DnaK (HSP70)
TRINITY_DN19353_c0_g1_i2	7	GO:0039563	#N/A	#N/A	#N/A
TRINITY_DN27087_c0_g3_i2	1	#N/A	K02931	RP-L5, MRPL5, rplE	Ribosomal protein L5
TRINITY_DN124803_c0_g1_i1	7	#N/A	K02274	coxA, ctaD	Heme/copper-type cytochrome/quinol oxidase, subunit 1
TRINITY_DN119249_c0_g1_i1	7	#N/A	K00939	adk, AK	Adenylate kinase or related kinase
TRINITY_DN36842_c0_g1_i1	7	#N/A	K02874	RP-L14, MRPL14, rplN	Ribosomal protein L14
TRINITY_DN20677_c0_g2_i1	6	#N/A	K02967	RP-S2, MRPS2, rpsB	Ribosomal protein S2
TRINITY_DN76365_c0_g1_i1	7	#N/A	K02892	RP-L23, MRPL23, rplW	Ribosomal protein L23
TRINITY_DN35128_c0_g1_i1	7	#N/A	K03043	rpoB	DNA-directed RNA polymerase, beta subunit/140 kD subunit
TRINITY_DN28083_c0_g1_i2	6	#N/A	K10232	aglE, ggtB	ABC-type glycerol-3-phosphate transport system, periplasmic component
TRINITY_DN89723_c0_g1_i1	7	#N/A	K02967	RP-S2, MRPS2, rpsB	Ribosomal protein S2
TRINITY_DN38766_c0_g1_i1	7	#N/A	K00525	E1.17.4.1A, nrdA, nrdE	Ribonucleotide reductase alpha subunit
TRINITY_DN41507_c0_g3_i1	7	#N/A	K04043	dnaK, HSPA9	Molecular chaperone DnaK (HSP70)
TRINITY_DN4763_c0_g1_i5	5	#N/A	NA	NA	Xanthine/uracil permease
TRINITY_DN29097_c1_g1_i1	6	#N/A	K02002	proX	ABC-type proline/glycine betaine transport system, periplasmic component
TRINITY_DN53793_c0_g1_i1	1	#N/A	K02946	RP-S10, MRPS10, rpsJ	Ribosomal protein S10
TRINITY_DN33270_c0_g2_i1	7	#N/A	K02358	tuf, TUFM	Translation elongation factor EF-Tu, a GTPase
TRINITY_DN9349_c2_g4_i1	7	#N/A	K02355	fusA, GFM, EFG	Translation elongation factor EF-G, a GTPase
TRINITY_DN27399_c1_g3_i1	3	#N/A	K04043	dnaK, HSPA9	Molecular chaperone DnaK (HSP70)
TRINITY_DN5271_c0_g1_i2	7	#N/A	K03088	rpoE	DNA-directed RNA polymerase specialized sigma subunit, sigma24 family
TRINITY_DN5271_c0_g1_i7	6	#N/A	K03088	rpoE	DNA-directed RNA polymerase specialized sigma subunit, sigma24 family
TRINITY_DN11848_c0_g1_i5	7	#N/A	K07795	tctC	Tripartite-type tricarboxylate transporter, receptor component TctC
TRINITY_DN121143_c0_g1_i1	7	#N/A	K00962	pnp, PNPT1	Polyribonucleotide nucleotidyltransferase (polynucleotide phosphorylase)
TRINITY_DN124008_c0_g1_i1	7	#N/A	K02112	ATPF1B, atpD	FoF1-type ATP synthase, beta subunit
TRINITY_DN134656_c0_g1_i1	4	#N/A	K03310	TC.AGCS	Na+/alanine symporter
TRINITY_DN106133_c0_g1_i1	1	#N/A	K02970	RP-S21, MRPS21, rpsU	Ribosomal protein S21
TRINITY_DN106321_c0_g1_i1	7	#N/A	K00340	nuoK	NADH:ubiquinone oxidoreductase subunit 11 or 4L (chain K)
TRINITY_DN106378_c0_g1_i1	7	#N/A	K01939	purA, ADSS	Adenylosuccinate synthase
TRINITY_DN119013_c0_g1_i1	7	#N/A	K01358	clpP, CLPP	ATP-dependent protease ClpP, protease subunit
TRINITY_DN107900_c0_g1_i1	7	#N/A	NA	NA	Acyl-CoA dehydrogenase related to the alkylation response protein AidB
TRINITY_DN140351_c0_g1_i1	7	GO:0090305	NA	NA	Uncharacterized conserved protein, contains ParB-like and HNH nuclease domains
TRINITY_DN110342_c0_g1_i1	7	#N/A	NA	NA	Periplasmic serine protease, S1-C subfamily, contain C-terminal PDZ domain
TRINITY_DN138004_c0_g1_i1	2	#N/A	K02945	RP-S1, rpsA	Ribosomal protein S1
TRINITY_DN133659_c0_g1_i1	7	#N/A	K02895	RP-L24, MRPL24, rplX	Ribosomal protein L24
TRINITY_DN135507_c0_g1_i1	7	#N/A	K09903	pyrH	Uridylate kinase
TRINITY_DN42498_c0_g1_i1	7	#N/A	K02952	RP-S13, rpsM	Ribosomal protein S13
TRINITY_DN41658_c0_g2_i1	6	#N/A	K02518	infA	Translation initiation factor IF-1
TRINITY_DN76902_c0_g1_i1	7	#N/A	K02876	RP-L15, MRPL15, rplO	Ribosomal protein L15
TRINITY_DN25236_c3_g1_i1	7	#N/A	K02112	ATPF1B, atpD	FoF1-type ATP synthase, beta subunit
TRINITY_DN64781_c0_g1_i1	7	#N/A	K03076	secY	Preprotein translocase subunit SecY
TRINITY_DN41246_c0_g1_i1	6	#N/A	K01915	glnA, GLUL	Glutamine synthetase
TRINITY_DN62375_c0_g1_i1	2	#N/A	NA	NA	Isopenicillin N synthase and related dioxygenases
TRINITY_DN10348_c0_g1_i2	4	#N/A	K02358	tuf, TUFM	Translation elongation factor EF-Tu, a GTPase
TRINITY_DN10640_c0_g3_i7	1	#N/A	K04078	groES, HSPE1	Co-chaperonin GroES (HSP10)
TRINITY_DN34709_c1_g1_i1	6	#N/A	K02355	fusA, GFM, EFG	Translation elongation factor EF-G, a GTPase
TRINITY_DN75528_c0_g1_i1	6	#N/A	K00864	glpK, GK	Glycerol kinase
TRINITY_DN43712_c0_g1_i1	7	#N/A	K02274	coxA, ctaD	Heme/copper-type cytochrome/quinol oxidase, subunit 1
TRINITY_DN46130_c0_g1_i1	7	#N/A	K00615	E2.2.1.1, tktA, tktB	Transketolase
TRINITY_DN65009_c0_g1_i1	7	#N/A	K01358	clpP, CLPP	ATP-dependent protease ClpP, protease subunit
TRINITY_DN19616_c0_g1_i14	1	#N/A	K02114	ATPF1E, atpC	FoF1-type ATP synthase, epsilon subunit
TRINITY_DN78169_c0_g1_i1	4	#N/A	K02902	RP-L28, MRPL28, rpmB	Ribosomal protein L28
TRINITY_DN55252_c0_g1_i1	7	#N/A	K04043	dnaK, HSPA9	Molecular chaperone DnaK (HSP70)
TRINITY_DN34654_c0_g1_i1	3	#N/A	K02357	tsf, TSFM	Translation elongation factor EF-Ts
TRINITY_DN19214_c0_g1_i2	2	#N/A	K24158	prx	Alkyl hydroperoxide reductase subunit AhpC (peroxiredoxin)
TRINITY_DN51364_c0_g1_i1	7	#N/A	K00600	glyA, SHMT	Glycine/serine hydroxymethyltransferase
TRINITY_DN91570_c0_g1_i1	6	#N/A	K00341	nuoL	NADH:ubiquinone oxidoreductase subunit 5 (chain L)/Multisubunit Na+/H+ antiporter, MnhA subunit
TRINITY_DN43147_c0_g1_i1	7	#N/A	K01358	clpP, CLPP	ATP-dependent protease ClpP, protease subunit
TRINITY_DN23521_c0_g1_i1	6	#N/A	NA	NA	Co-chaperonin GroES (HSP10)
TRINITY_DN33069_c0_g1_i1	7	#N/A	K02895	RP-L24, MRPL24, rplX	Ribosomal protein L24
TRINITY_DN20597_c0_g1_i1	7	#N/A	K02519	infB, MTIF2	Translation initiation factor IF-2, a GTPase
TRINITY_DN75658_c0_g1_i1	7	#N/A	K00966	GMPP	NDP-sugar pyrophosphorylase, includes eIF-2Bgamma, eIF-2Bepsilon, and LPS biosynthesis proteins
TRINITY_DN51639_c0_g1_i1	7	#N/A	K02881	RP-L18, MRPL18, rplR	Ribosomal protein L18
TRINITY_DN9349_c2_g6_i1	1	#N/A	K02926	RP-L4, MRPL4, rplD	Ribosomal protein L4
TRINITY_DN50134_c0_g1_i1	7	#N/A	K02948	RP-S11, MRPS11, rpsK	Ribosomal protein S11
TRINITY_DN28552_c0_g1_i1	6	#N/A	K02358	tuf, TUFM	Translation elongation factor EF-Tu, a GTPase
TRINITY_DN90064_c0_g1_i1	3	#N/A	NA	NA	Heme/copper-type cytochrome/quinol oxidase, subunit 3
TRINITY_DN38176_c0_g2_i1	7	#N/A	K03043	rpoB	DNA-directed RNA polymerase, beta subunit/140 kD subunit
TRINITY_DN59308_c0_g2_i1	7	#N/A	NA	NA	NADH:ubiquinone oxidoreductase 27 kD subunit (chain C)
TRINITY_DN52228_c0_g1_i1	7	#N/A	#N/A	#N/A	#N/A
TRINITY_DN114758_c0_g1_i1	7	#N/A	#N/A	#N/A	#N/A
TRINITY_DN28648_c0_g1_i1	7	#N/A	#N/A	#N/A	#N/A
TRINITY_DN27237_c0_g1_i8	7	GO:0019516	#N/A	#N/A	#N/A
TRINITY_DN56249_c0_g1_i1	7	GO:0010951	#N/A	#N/A	#N/A
TRINITY_DN37643_c0_g1_i2	7	#N/A	#N/A	#N/A	#N/A
TRINITY_DN63792_c0_g1_i1	7	#N/A	#N/A	#N/A	#N/A
TRINITY_DN138594_c0_g1_i1	7	#N/A	#N/A	#N/A	#N/A
TRINITY_DN24744_c0_g1_i2	7	GO:0007165	#N/A	#N/A	#N/A
TRINITY_DN24469_c0_g1_i8	7	GO:0010951	#N/A	#N/A	#N/A
TRINITY_DN70861_c0_g1_i1	7	#N/A	#N/A	#N/A	#N/A
TRINITY_DN50347_c0_g1_i22	7	GO:0010951	#N/A	#N/A	#N/A
TRINITY_DN15885_c0_g1_i12	4	#N/A	K02035	ABC.PE.S	ABC-type transport system, periplasmic component
TRINITY_DN9622_c0_g2_i2	3	GO:0015979	#N/A	#N/A	#N/A
TRINITY_DN34530_c0_g2_i2	1	#N/A	K02935	RP-L7, MRPL12, rplL	Ribosomal protein L7/L12
TRINITY_DN14592_c3_g1_i1	7	#N/A	K02111	ATPF1A, atpA	FoF1-type ATP synthase, alpha subunit
TRINITY_DN23130_c0_g1_i4	4	#N/A	K10553	frcC	NA
TRINITY_DN16294_c0_g1_i1	7	#N/A	K02986	RP-S4, rpsD	Ribosomal protein S4 or related protein
TRINITY_DN54281_c1_g1_i3	2	#N/A	K04077	groEL, HSPD1	Chaperonin GroEL (HSP60 family)
TRINITY_DN27502_c0_g1_i4	2	#N/A	K09969	aapJ, bztA	ABC-type amino acid transport/signal transduction system, periplasmic component/domain
TRINITY_DN14592_c3_g1_i2	1	#N/A	K02111	ATPF1A, atpA	FoF1-type ATP synthase, alpha subunit
TRINITY_DN9622_c0_g2_i4	3	GO:0006689	#N/A	#N/A	#N/A
TRINITY_DN7727_c0_g1_i95	4	#N/A	NA	NA	NA
TRINITY_DN22827_c0_g2_i1	4	#N/A	NA	NA	TRAP-type mannitol/chloroaromatic compound transport system, periplasmic component
TRINITY_DN6523_c0_g1_i30	3	#N/A	K06168	miaB	tRNA A37 methylthiotransferase MiaB
TRINITY_DN30735_c0_g1_i1	1	#N/A	K02874	RP-L14, MRPL14, rplN	Ribosomal protein L14
TRINITY_DN37124_c0_g3_i1	1	#N/A	K03530	hupB	Bacterial nucleoid DNA-binding protein
TRINITY_DN27087_c0_g2_i1	1	#N/A	K02895	RP-L24, MRPL24, rplX	Ribosomal protein L24
TRINITY_DN49200_c0_g1_i1	1	#N/A	K09969	aapJ, bztA	ABC-type amino acid transport/signal transduction system, periplasmic component/domain
TRINITY_DN43529_c0_g2_i1	3	#N/A	K03043	rpoB	DNA-directed RNA polymerase, beta subunit/140 kD subunit
TRINITY_DN33095_c0_g1_i1	5	#N/A	K02916	RP-L35, MRPL35, rpmI	Ribosomal protein L35
TRINITY_DN42229_c0_g3_i1	2	#N/A	K02879	RP-L17, MRPL17, rplQ	Ribosomal protein L17
TRINITY_DN36625_c0_g3_i2	1	#N/A	K02355	fusA, GFM, EFG	Translation elongation factor EF-G, a GTPase
TRINITY_DN76154_c0_g1_i1	1	#N/A	K04077	groEL, HSPD1	Chaperonin GroEL (HSP60 family)
TRINITY_DN8077_c0_g1_i3	1	#N/A	K02358	tuf, TUFM	Translation elongation factor EF-Tu, a GTPase
TRINITY_DN20619_c0_g1_i2	1	#N/A	K02935	RP-L7, MRPL12, rplL	Ribosomal protein L7/L12
TRINITY_DN19446_c3_g1_i1	3	#N/A	K01251	E3.3.1.1, ahcY	S-adenosylhomocysteine hydrolase
TRINITY_DN49216_c0_g1_i1	1	#N/A	K02982	RP-S3, rpsC	Ribosomal protein S3
TRINITY_DN10644_c0_g2_i1	5	#N/A	K02355	fusA, GFM, EFG	Translation elongation factor EF-G, a GTPase
TRINITY_DN34709_c0_g4_i2	1	#N/A	K02950	RP-S12, MRPS12, rpsL	Ribosomal protein S12
TRINITY_DN119076_c0_g1_i1	1	#N/A	K03553	recA	RecA/RadA recombinase
TRINITY_DN49226_c0_g1_i1	7	#N/A	K02871	RP-L13, MRPL13, rplM	Ribosomal protein L13
TRINITY_DN30735_c1_g2_i1	3	#N/A	K02965	RP-S19, rpsS	Ribosomal protein S19
TRINITY_DN75268_c0_g1_i1	6	#N/A	K03046	rpoC	DNA-directed RNA polymerase, beta' subunit/160 kD subunit
TRINITY_DN63186_c0_g1_i1	1	#N/A	K02863	RP-L1, MRPL1, rplA	Ribosomal protein L1
TRINITY_DN16835_c0_g1_i1	5	#N/A	K00128	ALDH	Acyl-CoA reductase or other NAD-dependent aldehyde dehydrogenase
TRINITY_DN57859_c0_g1_i1	1	#N/A	K03046	rpoC	DNA-directed RNA polymerase, beta' subunit/160 kD subunit
TRINITY_DN91878_c0_g1_i1	7	#N/A	K02939	RP-L9, MRPL9, rplI	Ribosomal protein L9
TRINITY_DN17910_c0_g1_i4	6	#N/A	#N/A	#N/A	#N/A
TRINITY_DN30130_c0_g1_i29	4	GO:0006811	K08720	ompU	Outer membrane protein (porin)
TRINITY_DN119429_c0_g1_i1	3	#N/A	K04564	SOD2	Superoxide dismutase
TRINITY_DN119160_c0_g1_i1	1	#N/A	K02884	RP-L19, MRPL19, rplS	Ribosomal protein L19
TRINITY_DN49268_c0_g1_i1	5	#N/A	K04087	hflC	Regulator of protease activity HflC, stomatin/prohibitin superfamily
TRINITY_DN45285_c0_g1_i1	5	#N/A	K03046	rpoC	DNA-directed RNA polymerase, beta' subunit/160 kD subunit
TRINITY_DN62011_c0_g1_i1	1	#N/A	K02358	tuf, TUFM	Translation elongation factor EF-Tu, a GTPase
TRINITY_DN20619_c2_g1_i1	7	#N/A	K03043	rpoB	DNA-directed RNA polymerase, beta subunit/140 kD subunit
TRINITY_DN15119_c0_g1_i1	5	#N/A	K02108	ATPF0A, atpB	FoF1-type ATP synthase, membrane subunit a
TRINITY_DN50685_c0_g1_i2	1	#N/A	K08301	rng, cafA	Ribonuclease G or E
TRINITY_DN79833_c0_g1_i1	1	#N/A	K02899	RP-L27, MRPL27, rpmA	Ribosomal protein L27
TRINITY_DN32274_c0_g1_i1	1	#N/A	K03046	rpoC	NA
TRINITY_DN53679_c0_g1_i1	1	#N/A	NA	NA	TRAP-type mannitol/chloroaromatic compound transport system, periplasmic component
TRINITY_DN12535_c0_g1_i1	4	#N/A	#N/A	#N/A	#N/A
TRINITY_DN120537_c0_g1_i1	1	#N/A	K02988	RP-S5, MRPS5, rpsE	Ribosomal protein S5
TRINITY_DN134275_c0_g1_i1	3	#N/A	K17247	msrQ	Periplasmic DMSO/TMAO reductase YedYZ, heme-binding membrane subunit
TRINITY_DN139864_c0_g1_i1	6	#N/A	K03640	pal	Outer membrane protein OmpA and related peptidoglycan-associated (lipo)proteins
TRINITY_DN54749_c0_g2_i1	5	#N/A	K02906	RP-L3, MRPL3, rplC	Ribosomal protein L3
TRINITY_DN36847_c0_g1_i1	5	#N/A	K13584	ctrA	DNA-binding response regulator, OmpR family, contains REC and winged-helix (wHTH) domain
TRINITY_DN36883_c0_g1_i1	6	#N/A	K02939	RP-L9, MRPL9, rplI	Ribosomal protein L9
TRINITY_DN9994_c0_g1_i1	4	#N/A	NA	NA	ABC-type glycerol-3-phosphate transport system, periplasmic component
TRINITY_DN38196_c0_g1_i1	1	#N/A	K03495	gidA, mnmG, MTO1	tRNA U34 5-carboxymethylaminomethyl modifying enzyme MnmG/GidA
TRINITY_DN28861_c0_g1_i2	3	#N/A	K19221	cobA, btuR	ATP:corrinoid adenosyltransferase
TRINITY_DN42753_c0_g1_i1	3	#N/A	K07126	K07126	TPR repeat
TRINITY_DN38225_c0_g1_i1	1	#N/A	K02887	RP-L20, MRPL20, rplT	Ribosomal protein L20
TRINITY_DN90734_c0_g1_i1	7	GO:0071702	K21395	yiaO	TRAP-type C4-dicarboxylate transport system, periplasmic component
TRINITY_DN23184_c0_g2_i1	1	#N/A	K02864	RP-L10, MRPL10, rplJ	Ribosomal protein L10
TRINITY_DN89449_c0_g1_i1	6	#N/A	NA	NA	NA
TRINITY_DN61052_c0_g1_i1	1	#N/A	K02996	RP-S9, MRPS9, rpsI	Ribosomal protein S9
TRINITY_DN35353_c0_g2_i1	5	#N/A	K04034	bchE	Radical SAM superfamily enzyme YgiQ, UPF0313 family
TRINITY_DN25365_c0_g1_i1	3	#N/A	K02600	nusA	Transcription antitermination factor NusA, contains S1 and KH domains
TRINITY_DN20973_c0_g1_i1	5	#N/A	K02078	acpP	Acyl carrier protein
TRINITY_DN59192_c0_g1_i1	5	#N/A	K03852	xsc	Acetolactate synthase large subunit or other thiamine pyrophosphate-requiring enzyme
TRINITY_DN27127_c0_g1_i1	2	#N/A	K02967	RP-S2, MRPS2, rpsB	Ribosomal protein S2
TRINITY_DN77244_c0_g1_i1	3	#N/A	NA	NA	Methanogenic corrinoid protein MtbC1
TRINITY_DN67480_c0_g1_i1	1	#N/A	K02002	proX	ABC-type proline/glycine betaine transport system, periplasmic component
TRINITY_DN30851_c0_g1_i1	5	#N/A	K02986	RP-S4, rpsD	Ribosomal protein S4 or related protein
TRINITY_DN77345_c0_g1_i1	5	#N/A	K14083	mttB	Trimethylamine:corrinoid methyltransferase
TRINITY_DN24469_c0_g1_i17	3	GO:0010951	#N/A	#N/A	#N/A
TRINITY_DN19271_c0_g1_i1	1	#N/A	K02860	rimM	Ribosomal 30S subunit maturation factor RimM, required for 16S rRNA processing
TRINITY_DN111413_c0_g1_i1	3	#N/A	K02871	RP-L13, MRPL13, rplM	Ribosomal protein L13
TRINITY_DN134456_c0_g1_i1	2	#N/A	K06890	K06890	Integral membrane protein, interacts with FtsH
TRINITY_DN112380_c0_g1_i1	1	#N/A	K03046	rpoC	Biotin carboxyl carrier protein
TRINITY_DN106776_c0_g1_i1	1	#N/A	K04043	dnaK, HSPA9	Molecular chaperone DnaK (HSP70)
TRINITY_DN133263_c0_g1_i1	6	#N/A	K01358	clpP, CLPP	ATP-dependent protease ClpP, protease subunit
TRINITY_DN123214_c0_g1_i1	7	#N/A	K01955	carB, CPA2	Carbamoylphosphate synthase large subunit
TRINITY_DN125867_c0_g1_i1	7	#N/A	K02945	RP-S1, rpsA	Ribosomal protein S1
TRINITY_DN118155_c0_g1_i1	7	#N/A	K11688	dctP	TRAP-type C4-dicarboxylate transport system, periplasmic component
TRINITY_DN139703_c0_g1_i1	3	#N/A	K00616	E2.2.1.2, talA, talB	Transaldolase
TRINITY_DN138225_c0_g1_i1	1	#N/A	K06204	dksA	RNA polymerase-binding transcription factor DksA
TRINITY_DN59087_c1_g1_i1	1	#N/A	K02945	RP-S1, rpsA	Ribosomal protein S1
TRINITY_DN41180_c0_g1_i1	6	#N/A	NA	NA	NA
TRINITY_DN37100_c0_g1_i1	6	#N/A	K04771	degP, htrA	Periplasmic serine protease, S1-C subfamily, contain C-terminal PDZ domain
TRINITY_DN41645_c0_g1_i1	7	#N/A	K04077	groEL, HSPD1	Chaperonin GroEL (HSP60 family)
TRINITY_DN66785_c0_g1_i1	6	#N/A	K08956	AFG3	ATP-dependent Zn proteases
TRINITY_DN61500_c0_g1_i1	1	#N/A	K02111	ATPF1A, atpA	FoF1-type ATP synthase, alpha subunit
TRINITY_DN90082_c0_g1_i1	1	#N/A	K00962	pnp, PNPT1	Polyribonucleotide nucleotidyltransferase (polynucleotide phosphorylase)
TRINITY_DN41352_c0_g2_i1	1	#N/A	K04072	adhE	Acyl-CoA reductase or other NAD-dependent aldehyde dehydrogenase
TRINITY_DN41372_c0_g2_i1	1	GO:0006865	K01999	livK	ABC-type branched-chain amino acid transport system, periplasmic component
TRINITY_DN20661_c1_g1_i1	5	#N/A	K02111	ATPF1A, atpA	FoF1-type ATP synthase, alpha subunit
TRINITY_DN42353_c0_g2_i1	2	#N/A	K02965	RP-S19, rpsS	Ribosomal protein S19
TRINITY_DN74968_c0_g1_i1	1	#N/A	K04077	groEL, HSPD1	Chaperonin GroEL (HSP60 family)
TRINITY_DN80408_c0_g1_i1	7	#N/A	K06207	typA, bipA	Predicted membrane GTPase involved in stress response
TRINITY_DN45190_c0_g1_i1	4	#N/A	K04077	groEL, HSPD1	Chaperonin GroEL (HSP60 family)
TRINITY_DN91059_c0_g1_i1	6	GO:0055085	NA	NA	TRAP-type mannitol/chloroaromatic compound transport system, periplasmic component
TRINITY_DN59357_c0_g1_i1	6	#N/A	K00053	ilvC	Ketol-acid reductoisomerase
TRINITY_DN19214_c0_g1_i3	6	#N/A	K24158	prx	Alkyl hydroperoxide reductase subunit AhpC (peroxiredoxin)
TRINITY_DN18309_c0_g3_i2	2	#N/A	K02961	RP-S17, MRPS17, rpsQ	Ribosomal protein S17
TRINITY_DN29097_c2_g2_i1	4	#N/A	K02112	ATPF1B, atpD	FoF1-type ATP synthase, beta subunit
TRINITY_DN92839_c0_g1_i1	7	#N/A	K02876	RP-L15, MRPL15, rplO	Ribosomal protein L15
TRINITY_DN65862_c0_g1_i1	2	#N/A	K03046	rpoC	NA
TRINITY_DN49891_c0_g1_i1	2	#N/A	K02355	fusA, GFM, EFG	Translation elongation factor EF-G, a GTPase
TRINITY_DN51611_c0_g1_i1	5	#N/A	NA	NA	Glycine cleavage system T protein (aminomethyltransferase)
TRINITY_DN30851_c0_g3_i1	7	#N/A	K03040	rpoA	DNA-directed RNA polymerase, alpha subunit/40 kD subunit
TRINITY_DN64423_c0_g1_i1	7	#N/A	K02950	RP-S12, MRPS12, rpsL	Ribosomal protein S12
TRINITY_DN9615_c0_g4_i1	1	#N/A	K02112	ATPF1B, atpD	FoF1-type ATP synthase, beta subunit
TRINITY_DN8077_c1_g3_i1	1	#N/A	K02906	RP-L3, MRPL3, rplC	Ribosomal protein L3
TRINITY_DN8077_c2_g2_i1	2	#N/A	K02358	tuf, TUFM	Translation elongation factor EF-Tu, a GTPase
TRINITY_DN95921_c0_g1_i1	1	#N/A	K05788	ihfB, himD	Bacterial nucleoid DNA-binding protein
TRINITY_DN49682_c0_g1_i1	7	#N/A	K02355	fusA, GFM, EFG	Translation elongation factor EF-G, a GTPase
TRINITY_DN46355_c0_g1_i1	1	#N/A	K08301	rng, cafA	Ribonuclease G or E
TRINITY_DN20421_c0_g1_i2	4	#N/A	#N/A	#N/A	#N/A
TRINITY_DN119527_c0_g1_i1	7	#N/A	#N/A	#N/A	#N/A
TRINITY_DN3102_c0_g1_i12	4	GO:1902895	#N/A	#N/A	#N/A
TRINITY_DN16040_c0_g1_i2	3	GO:0010951	#N/A	#N/A	#N/A
TRINITY_DN142808_c0_g1_i1	7	#N/A	#N/A	#N/A	#N/A
TRINITY_DN74787_c0_g1_i1	7	#N/A	#N/A	#N/A	#N/A
TRINITY_DN36456_c0_g1_i6	6	GO:0045299	#N/A	#N/A	#N/A
TRINITY_DN46242_c1_g1_i1	7	#N/A	#N/A	#N/A	#N/A
TRINITY_DN56825_c0_g1_i1	7	GO:0010951	#N/A	#N/A	#N/A
TRINITY_DN58994_c0_g1_i1	3	GO:0051301	#N/A	#N/A	#N/A
TRINITY_DN27257_c0_g1_i1	7	#N/A	#N/A	#N/A	#N/A
TRINITY_DN12082_c1_g1_i1	3	GO:0010468	#N/A	#N/A	#N/A
TRINITY_DN104284_c0_g1_i1	6	#N/A	K02867	RP-L11, MRPL11, rplK	Ribosomal protein L11
TRINITY_DN130544_c0_g1_i1	7	#N/A	K02112	ATPF1B, atpD	FoF1-type ATP synthase, beta subunit
TRINITY_DN110430_c0_g1_i1	3	#N/A	NA	NA	NA
TRINITY_DN138408_c0_g1_i1	7	#N/A	K03666	hfq	sRNA-binding regulator protein Hfq
TRINITY_DN134894_c0_g1_i1	7	#N/A	K00962	pnp, PNPT1	Polyribonucleotide nucleotidyltransferase (polynucleotide phosphorylase)
TRINITY_DN118515_c0_g1_i1	7	#N/A	K03694	clpA	ATP-dependent Clp protease ATP-binding subunit ClpA
TRINITY_DN136286_c0_g1_i1	7	#N/A	K02343	dnaX	DNA polymerase III, gamma/tau subunits
TRINITY_DN105661_c0_g1_i1	4	#N/A	K02926	RP-L4, MRPL4, rplD	Ribosomal protein L4
TRINITY_DN106790_c0_g1_i1	7	#N/A	K03043	rpoB	DNA-directed RNA polymerase, beta subunit/140 kD subunit
TRINITY_DN134587_c0_g1_i1	3	#N/A	K02986	RP-S4, rpsD	Ribosomal protein S4 or related protein
TRINITY_DN119885_c0_g1_i1	4	#N/A	K03046	rpoC	NA
TRINITY_DN143215_c0_g1_i1	2	#N/A	K02357	tsf, TSFM	Translation elongation factor EF-Ts
TRINITY_DN104880_c0_g1_i1	7	#N/A	K05592	deaD, cshA	Superfamily II DNA and RNA helicase
TRINITY_DN125878_c0_g1_i1	7	#N/A	K09969	aapJ, bztA	ABC-type amino acid transport/signal transduction system, periplasmic component/domain
TRINITY_DN108119_c0_g1_i1	5	#N/A	K02982	RP-S3, rpsC	Ribosomal protein S3
TRINITY_DN137193_c0_g1_i1	7	#N/A	K02355	fusA, GFM, EFG	Translation elongation factor EF-G, a GTPase
TRINITY_DN121238_c0_g1_i1	1	#N/A	K03557	fis	DNA-binding protein Fis (factor for inversion stimulation)
TRINITY_DN110660_c0_g1_i1	1	#N/A	K03043	rpoB	DNA-directed RNA polymerase, beta subunit/140 kD subunit
TRINITY_DN120829_c0_g1_i1	7	#N/A	K03072	secD	Preprotein translocase subunit SecD
TRINITY_DN132855_c0_g1_i1	7	#N/A	NA	NA	O-acetylhomoserine/O-acetylserine sulfhydrylase, pyridoxal phosphate-dependent
TRINITY_DN132861_c0_g1_i1	7	#N/A	K03043	rpoB	DNA-directed RNA polymerase, beta subunit/140 kD subunit
TRINITY_DN104723_c0_g1_i1	7	#N/A	K09458	fabF, OXSM, CEM1	3-oxoacyl-(acyl-carrier-protein) synthase
TRINITY_DN123586_c0_g1_i1	6	#N/A	K02518	infA	Translation initiation factor IF-1
TRINITY_DN27437_c0_g1_i2	1	#N/A	NA	NA	Transcriptional regulator, contains XRE-family HTH domain
TRINITY_DN61105_c0_g1_i1	6	#N/A	K02887	RP-L20, MRPL20, rplT	Ribosomal protein L20
TRINITY_DN89629_c0_g1_i1	7	#N/A	K03694	clpA	ATP-dependent Clp protease ATP-binding subunit ClpA
TRINITY_DN91963_c0_g1_i1	5	#N/A	K02967	RP-S2, MRPS2, rpsB	Ribosomal protein S2
TRINITY_DN84445_c0_g1_i1	7	#N/A	K09014	sufB	Fe-S cluster assembly scaffold protein SufB
TRINITY_DN66423_c0_g1_i1	7	#N/A	K02600	nusA	NA
TRINITY_DN29758_c0_g1_i1	4	#N/A	K10112	msmX, msmK, malK, sugC, ggtA, msiK	ABC-type sugar transport system, ATPase component
TRINITY_DN39600_c0_g1_i1	3	#N/A	NA	NA	Fe-S cluster biogenesis protein NfuA, 4Fe-4S-binding domain
TRINITY_DN76093_c0_g1_i1	5	#N/A	K21309	soeC	NA
TRINITY_DN58944_c0_g1_i1	1	#N/A	K02996	RP-S9, MRPS9, rpsI	Ribosomal protein S9
TRINITY_DN54281_c2_g2_i1	6	#N/A	K04077	groEL, HSPD1	Chaperonin GroEL (HSP60 family)
TRINITY_DN39604_c0_g2_i2	1	#N/A	K03118	tatC	Sec-independent protein secretion pathway component TatC
TRINITY_DN39630_c0_g1_i1	2	#N/A	K03046	rpoC	NA
TRINITY_DN77710_c0_g1_i1	7	#N/A	K00791	miaA, TRIT1	tRNA A37 N6-isopentenylltransferase MiaA
TRINITY_DN63093_c0_g1_i1	4	#N/A	K02933	RP-L6, MRPL6, rplF	Ribosomal protein L6P/L9E
TRINITY_DN55586_c0_g1_i1	7	#N/A	K03695	clpB	ATP-dependent Clp protease ATP-binding subunit ClpA
TRINITY_DN66784_c0_g1_i1	7	#N/A	K01358	clpP, CLPP	ATP-dependent protease ClpP, protease subunit
TRINITY_DN22119_c0_g1_i19	2	#N/A	K02355	fusA, GFM, EFG	Translation elongation factor EF-G, a GTPase
TRINITY_DN22119_c0_g1_i9	6	#N/A	K02358	tuf, TUFM	Translation elongation factor EF-Tu, a GTPase
TRINITY_DN10855_c0_g1_i4	3	#N/A	K02945	RP-S1, rpsA	Ribosomal protein S1
TRINITY_DN43698_c0_g1_i2	7	#N/A	K01251	E3.3.1.1, ahcY	S-adenosylhomocysteine hydrolase
TRINITY_DN49386_c0_g1_i1	4	#N/A	K11532	glpX-SEBP	Fructose-1,6-bisphosphatase/sedoheptulose 1,7-bisphosphatase or related protein
TRINITY_DN45073_c0_g1_i2	7	#N/A	K02358	tuf, TUFM	Translation elongation factor EF-Tu, a GTPase
TRINITY_DN45061_c0_g2_i1	7	#N/A	K01271	pepQ	Xaa-Pro aminopeptidase
TRINITY_DN45047_c0_g1_i1	7	#N/A	K03046	rpoC	NA
TRINITY_DN41464_c0_g1_i2	3	#N/A	K02518	infA	Translation initiation factor IF-1
TRINITY_DN41351_c0_g1_i1	4	#N/A	K03043	rpoB	DNA-directed RNA polymerase, beta subunit/140 kD subunit
TRINITY_DN65346_c0_g1_i1	1	#N/A	K02112	ATPF1B, atpD	FoF1-type ATP synthase, beta subunit
TRINITY_DN20641_c1_g1_i1	6	#N/A	K02945	RP-S1, rpsA	Ribosomal protein S1
TRINITY_DN21869_c2_g1_i1	6	GO:0015979	NA	NA	Uncharacterized protein
TRINITY_DN40954_c0_g1_i1	7	#N/A	K02519	infB, MTIF2	NA
TRINITY_DN41260_c0_g1_i1	6	#N/A	K00024	mdh	Malate/lactate dehydrogenase
TRINITY_DN41236_c0_g1_i1	1	#N/A	K03217	yidC, spoIIIJ, OXA1, ccfA	NA
TRINITY_DN58100_c0_g1_i2	7	#N/A	K03545	tig	NA
TRINITY_DN38225_c0_g2_i1	7	#N/A	K02887	RP-L20, MRPL20, rplT	Ribosomal protein L20
TRINITY_DN38225_c0_g4_i5	7	#N/A	K02916	RP-L35, MRPL35, rpmI	Ribosomal protein L35
TRINITY_DN35113_c0_g1_i2	6	#N/A	K04043	dnaK, HSPA9	Molecular chaperone DnaK (HSP70)
TRINITY_DN28682_c0_g2_i2	1	#N/A	K02931	RP-L5, MRPL5, rplE	Ribosomal protein L5
TRINITY_DN35205_c0_g1_i2	7	#N/A	NA	NA	TRAP-type mannitol/chloroaromatic compound transport system, periplasmic component
TRINITY_DN51040_c0_g1_i1	5	#N/A	K02906	RP-L3, MRPL3, rplC	Ribosomal protein L3
TRINITY_DN34530_c1_g1_i1	3	#N/A	K02864	RP-L10, MRPL10, rplJ	Ribosomal protein L10
TRINITY_DN78954_c0_g1_i1	7	#N/A	K23537	nupA	ABC-type uncharacterized transport system, ATPase component
TRINITY_DN38484_c0_g1_i1	4	#N/A	K02963	RP-S18, MRPS18, rpsR	Ribosomal protein S18
TRINITY_DN27844_c0_g1_i1	1	#N/A	K02112	ATPF1B, atpD	FoF1-type ATP synthase, beta subunit
TRINITY_DN60140_c0_g2_i1	3	#N/A	K03076	secY	Preprotein translocase subunit SecY
TRINITY_DN96659_c0_g1_i1	6	#N/A	K01735	aroB	3-dehydroquinate synthetase
TRINITY_DN37196_c0_g1_i2	3	#N/A	K11751	ushA	2',3'-cyclic-nucleotide 2'-phosphodiesterase/5'- or 3'-nucleotidase, 5'-nucleotidase family
TRINITY_DN63575_c0_g1_i1	6	#N/A	K00324	pntA	NA
TRINITY_DN62418_c0_g1_i1	7	#N/A	K01915	glnA, GLUL	Glutamine synthetase
TRINITY_DN50636_c0_g2_i1	7	#N/A	K03046	rpoC	DNA-directed RNA polymerase, beta' subunit/160 kD subunit
TRINITY_DN35456_c0_g1_i1	7	#N/A	K01681	ACO, acnA	Aconitase A
TRINITY_DN22853_c0_g1_i1	3	#N/A	K02897	RP-L25, rplY	Ribosomal protein L25 (general stress protein Ctc)
TRINITY_DN59308_c0_g1_i2	6	#N/A	NA	NA	NADH:ubiquinone oxidoreductase 27 kD subunit (chain C)
TRINITY_DN31954_c0_g1_i1	1	#N/A	K02959	RP-S16, MRPS16, rpsP	Ribosomal protein S16
TRINITY_DN95270_c0_g1_i1	6	#N/A	K02907	RP-L30, MRPL30, rpmD	Ribosomal protein L30/L7E
TRINITY_DN57994_c0_g1_i1	6	#N/A	K01939	purA, ADSS	Adenylosuccinate synthase
TRINITY_DN77020_c0_g1_i1	7	#N/A	K01756	purB, ADSL	Adenylosuccinate lyase
TRINITY_DN36019_c0_g1_i2	2	#N/A	NA	NA	NA
TRINITY_DN33923_c0_g1_i2	2	#N/A	K10232	aglE, ggtB	NA
TRINITY_DN61349_c0_g1_i1	6	#N/A	K03687	GRPE	Molecular chaperone GrpE (heat shock protein)
TRINITY_DN57226_c0_g2_i1	1	#N/A	K04043	dnaK, HSPA9	Molecular chaperone DnaK (HSP70)
TRINITY_DN29097_c0_g1_i2	1	GO:0006972	K02002	proX	ABC-type proline/glycine betaine transport system, periplasmic component
TRINITY_DN29097_c0_g1_i7	4	GO:0006865	K02002	proX	ABC-type proline/glycine betaine transport system, periplasmic component
TRINITY_DN57488_c0_g1_i1	2	#N/A	K02313	dnaA	Chromosomal replication initiation ATPase DnaA
TRINITY_DN34283_c0_g1_i1	7	#N/A	NA	NA	Outer membrane lipoprotein-sorting protein
TRINITY_DN40735_c0_g1_i1	7	#N/A	NA	NA	NADH:ubiquinone oxidoreductase subunit 2 (chain N)
TRINITY_DN97510_c0_g1_i1	2	#N/A	K05592	deaD, cshA	Superfamily II DNA and RNA helicase
TRINITY_DN92670_c0_g1_i1	7	#N/A	K03075	secG	Preprotein translocase subunit SecG
TRINITY_DN92680_c0_g1_i1	7	#N/A	K02600	nusA	NA
TRINITY_DN43158_c0_g1_i1	7	#N/A	K02863	RP-L1, MRPL1, rplA	Ribosomal protein L1
TRINITY_DN81751_c0_g1_i1	4	#N/A	K02879	RP-L17, MRPL17, rplQ	Ribosomal protein L17
TRINITY_DN28461_c0_g2_i1	7	#N/A	K02965	RP-S19, rpsS	Ribosomal protein S19
TRINITY_DN91817_c0_g1_i1	7	#N/A	K00337	nuoH	NADH:ubiquinone oxidoreductase subunit 1 (chain H)
TRINITY_DN53719_c0_g1_i1	3	#N/A	K03545	tig	FKBP-type peptidyl-prolyl cis-trans isomerase (trigger factor)
TRINITY_DN16485_c0_g1_i4	1	#N/A	K02967	RP-S2, MRPS2, rpsB	Ribosomal protein S2
TRINITY_DN45917_c0_g1_i1	4	#N/A	K02234	cobW	GTPase, G3E family
TRINITY_DN20125_c2_g2_i1	7	#N/A	K02867	RP-L11, MRPL11, rplK	Ribosomal protein L11
TRINITY_DN16955_c0_g2_i2	6	#N/A	K02358	tuf, TUFM	Translation elongation factor EF-Tu, a GTPase
TRINITY_DN16955_c0_g3_i1	2	#N/A	K02358	tuf, TUFM	Translation elongation factor EF-Tu, a GTPase
TRINITY_DN16955_c0_g3_i2	1	#N/A	K02358	tuf, TUFM	Translation elongation factor EF-Tu, a GTPase
TRINITY_DN12183_c0_g1_i13	4	#N/A	K02256	COX1	Heme/copper-type cytochrome/quinol oxidase, subunit 1
TRINITY_DN67960_c0_g1_i1	7	#N/A	K02078	acpP	Acyl carrier protein
TRINITY_DN705_c0_g1_i1	2	#N/A	K00343	nuoN	NADH:ubiquinone oxidoreductase subunit 2 (chain N)
TRINITY_DN70379_c0_g1_i1	7	#N/A	K02277	coxD, ctaF	Uncharacterized membrane protein YfcA
TRINITY_DN70390_c0_g1_i1	7	#N/A	NA	NA	Nitrogen regulatory protein PII
TRINITY_DN49634_c0_g1_i1	6	#N/A	K03086	rpoD	DNA-directed RNA polymerase, sigma subunit (sigma70/sigma32)
TRINITY_DN24606_c0_g1_i1	7	#N/A	K02600	nusA	NA
TRINITY_DN46724_c2_g1_i2	6	#N/A	K02261	COX2	Heme/copper-type cytochrome/quinol oxidase, subunit 2
TRINITY_DN55489_c0_g1_i1	7	#N/A	NA	NA	Heme/copper-type cytochrome/quinol oxidase, subunit 1
TRINITY_DN81010_c0_g1_i1	2	#N/A	#N/A	#N/A	#N/A
TRINITY_DN50347_c0_g1_i30	7	GO:2000272	#N/A	#N/A	#N/A
TRINITY_DN39400_c0_g2_i2	7	GO:0010951	#N/A	#N/A	#N/A
TRINITY_DN37349_c0_g1_i4	1	#N/A	#N/A	#N/A	#N/A
TRINITY_DN89003_c0_g1_i1	7	#N/A	#N/A	#N/A	#N/A
TRINITY_DN135338_c0_g1_i1	7	#N/A	#N/A	#N/A	#N/A
TRINITY_DN69556_c0_g1_i1	7	#N/A	#N/A	#N/A	#N/A
TRINITY_DN25613_c0_g1_i3	7	#N/A	#N/A	#N/A	#N/A
TRINITY_DN5921_c1_g2_i1	3	#N/A	#N/A	#N/A	#N/A
TRINITY_DN82032_c0_g1_i1	7	#N/A	#N/A	#N/A	#N/A
TRINITY_DN101053_c0_g1_i1	7	#N/A	#N/A	#N/A	#N/A
TRINITY_DN31800_c0_g1_i2	7	#N/A	#N/A	#N/A	#N/A
TRINITY_DN41132_c0_g1_i1	7	#N/A	#N/A	#N/A	#N/A
TRINITY_DN55176_c0_g1_i2	7	#N/A	#N/A	#N/A	#N/A
TRINITY_DN13362_c0_g1_i1	7	#N/A	#N/A	#N/A	#N/A
TRINITY_DN67657_c0_g1_i1	7	#N/A	#N/A	#N/A	#N/A
TRINITY_DN117423_c0_g1_i1	7	#N/A	#N/A	#N/A	#N/A
TRINITY_DN53695_c0_g1_i1	5	GO:0006281	#N/A	#N/A	#N/A
TRINITY_DN102048_c0_g1_i1	7	#N/A	#N/A	#N/A	#N/A
TRINITY_DN21869_c0_g1_i4	7	#N/A	#N/A	#N/A	#N/A
TRINITY_DN24680_c2_g1_i2	5	GO:0043065	#N/A	#N/A	#N/A
TRINITY_DN37399_c0_g1_i1	7	#N/A	#N/A	#N/A	#N/A
TRINITY_DN5921_c2_g1_i1	6	#N/A	#N/A	#N/A	#N/A
TRINITY_DN86999_c0_g1_i1	7	#N/A	#N/A	#N/A	#N/A
TRINITY_DN21580_c0_g1_i6	7	#N/A	#N/A	#N/A	#N/A
TRINITY_DN35647_c0_g1_i1	7	GO:0006689	#N/A	#N/A	#N/A
TRINITY_DN106068_c0_g1_i1	7	#N/A	#N/A	#N/A	#N/A
TRINITY_DN47163_c0_g1_i3	4	GO:0010951	#N/A	#N/A	#N/A
TRINITY_DN12084_c0_g1_i3	7	#N/A	#N/A	#N/A	#N/A
TRINITY_DN105967_c0_g1_i1	7	GO:0051607	#N/A	#N/A	#N/A
TRINITY_DN47523_c0_g1_i1	7	#N/A	#N/A	#N/A	#N/A
TRINITY_DN146755_c0_g1_i1	7	#N/A	#N/A	#N/A	#N/A
TRINITY_DN8822_c0_g1_i19	6	#N/A	#N/A	#N/A	#N/A
TRINITY_DN44128_c0_g1_i1	7	#N/A	#N/A	#N/A	#N/A
TRINITY_DN107250_c0_g1_i1	7	#N/A	#N/A	#N/A	#N/A
TRINITY_DN88757_c0_g1_i1	7	#N/A	#N/A	#N/A	#N/A
TRINITY_DN50347_c2_g1_i1	7	#N/A	#N/A	#N/A	#N/A
TRINITY_DN22821_c0_g1_i1	7	#N/A	#N/A	#N/A	#N/A
TRINITY_DN111298_c0_g1_i1	7	#N/A	#N/A	#N/A	#N/A
TRINITY_DN33667_c2_g1_i1	7	#N/A	#N/A	#N/A	#N/A
TRINITY_DN92718_c0_g1_i1	7	#N/A	#N/A	#N/A	#N/A
TRINITY_DN42753_c1_g2_i1	7	GO:0055085	#N/A	#N/A	#N/A
TRINITY_DN48379_c0_g3_i1	7	#N/A	#N/A	#N/A	#N/A
TRINITY_DN78727_c0_g1_i1	7	#N/A	#N/A	#N/A	#N/A
TRINITY_DN51807_c1_g1_i1	2	#N/A	#N/A	#N/A	#N/A
TRINITY_DN139982_c0_g1_i1	7	#N/A	#N/A	#N/A	#N/A
TRINITY_DN106994_c0_g1_i1	7	#N/A	#N/A	#N/A	#N/A
TRINITY_DN11196_c0_g1_i2	6	GO:0006689	#N/A	#N/A	#N/A
TRINITY_DN127648_c0_g1_i1	7	#N/A	#N/A	#N/A	#N/A
TRINITY_DN111320_c0_g1_i1	7	#N/A	#N/A	#N/A	#N/A
TRINITY_DN59455_c0_g1_i1	7	#N/A	#N/A	#N/A	#N/A
TRINITY_DN64814_c0_g1_i1	7	#N/A	#N/A	#N/A	#N/A
TRINITY_DN45406_c0_g1_i1	6	#N/A	K02867	RP-L11, MRPL11, rplK	Ribosomal protein L11
TRINITY_DN16989_c0_g1_i1	5	#N/A	K03686	dnaJ	DnaJ-class molecular chaperone with C-terminal Zn finger domain
TRINITY_DN12729_c0_g1_i5	4	#N/A	K08311	nudH	8-oxo-dGTP pyrophosphatase MutT and related house-cleaning NTP pyrophosphohydrolases, NUDIX family
TRINITY_DN16989_c0_g1_i3	5	#N/A	K03686	dnaJ	DnaJ-class molecular chaperone with C-terminal Zn finger domain
TRINITY_DN16989_c0_g1_i5	4	#N/A	K03686	dnaJ	DnaJ-class molecular chaperone with C-terminal Zn finger domain
TRINITY_DN19296_c0_g1_i1	1	GO:1904659	NA	NA	Tripartite-type tricarboxylate transporter, receptor component TctC
TRINITY_DN19296_c0_g1_i2	6	GO:1904659	NA	NA	Tripartite-type tricarboxylate transporter, receptor component TctC
TRINITY_DN19296_c0_g1_i3	4	GO:1904659	NA	NA	Tripartite-type tricarboxylate transporter, receptor component TctC
TRINITY_DN19296_c0_g1_i4	6	GO:1904659	NA	NA	Tripartite-type tricarboxylate transporter, receptor component TctC
TRINITY_DN8636_c0_g1_i2	3	GO:0006865	K03298	TC.DME	Uncharacterized membrane protein RarD, contains two EamA domains
TRINITY_DN8636_c0_g1_i1	4	GO:0006865	K03298	TC.DME	Uncharacterized membrane protein RarD, contains two EamA domains
TRINITY_DN8636_c0_g1_i6	1	GO:0006865	K03298	TC.DME	Uncharacterized membrane protein RarD, contains two EamA domains
TRINITY_DN39400_c0_g1_i18	4	#N/A	#N/A	#N/A	#N/A
TRINITY_DN25833_c0_g1_i1	6	#N/A	K02358	tuf, TUFM	Translation elongation factor EF-Tu, a GTPase
TRINITY_DN119559_c0_g1_i2	1	#N/A	K10543	xylF	ABC-type xylose transport system, periplasmic component
TRINITY_DN38533_c0_g1_i1	3	#N/A	K00024	mdh	Malate/lactate dehydrogenase
TRINITY_DN38533_c0_g1_i2	5	#N/A	K00024	mdh	Malate/lactate dehydrogenase
TRINITY_DN119559_c0_g1_i1	2	#N/A	K10543	xylF	ABC-type xylose transport system, periplasmic component
TRINITY_DN25833_c0_g1_i2	2	#N/A	K02358	tuf, TUFM	Translation elongation factor EF-Tu, a GTPase
TRINITY_DN34995_c0_g1_i6	6	#N/A	NA	NA	Crotonobetainyl-CoA:carnitine CoA-transferase CaiB and related acyl-CoA transferases
TRINITY_DN34995_c0_g1_i7	4	#N/A	NA	NA	Crotonobetainyl-CoA:carnitine CoA-transferase CaiB and related acyl-CoA transferases
TRINITY_DN36857_c0_g1_i4	6	#N/A	K11073	potF	Spermidine/putrescine-binding periplasmic protein
TRINITY_DN36857_c0_g1_i8	5	#N/A	K11073	potF	Spermidine/putrescine-binding periplasmic protein
TRINITY_DN32095_c0_g1_i1	4	#N/A	NA	NA	Choline-glycine betaine transporter
TRINITY_DN32095_c0_g1_i2	1	#N/A	NA	NA	Choline-glycine betaine transporter
TRINITY_DN32095_c0_g1_i3	1	#N/A	NA	NA	Choline-glycine betaine transporter
TRINITY_DN22119_c0_g1_i3	6	#N/A	K02926	RP-L4, MRPL4, rplD	Ribosomal protein L4
TRINITY_DN34530_c0_g2_i5	2	#N/A	K02935	RP-L7, MRPL12, rplL	Ribosomal protein L7/L12
TRINITY_DN25533_c0_g1_i6	3	#N/A	#N/A	#N/A	#N/A
TRINITY_DN54281_c1_g1_i4	6	#N/A	K04077	groEL, HSPD1	Chaperonin GroEL (HSP60 family)
TRINITY_DN50347_c0_g1_i19	4	GO:0016037	#N/A	#N/A	#N/A
TRINITY_DN8210_c0_g1_i1	4	#N/A	NA	NA	TRAP-type mannitol/chloroaromatic compound transport system, periplasmic component
TRINITY_DN8210_c0_g1_i6	4	#N/A	NA	NA	TRAP-type mannitol/chloroaromatic compound transport system, periplasmic component
TRINITY_DN1268_c1_g1_i46	5	#N/A	NA	NA	NA
TRINITY_DN2273_c0_g1_i27	6	#N/A	K02335	polA	DNA polymerase I - 3'-5' exonuclease and polymerase domains
TRINITY_DN2943_c0_g1_i14	3	#N/A	K01133	betC	Arylsulfatase A or related enzyme
TRINITY_DN93_c0_g1_i18	6	#N/A	NA	NA	NA
TRINITY_DN2943_c0_g1_i18	2	#N/A	K01133	betC	Arylsulfatase A or related enzyme
TRINITY_DN1895_c0_g1_i44	6	#N/A	K01869	LARS, leuS	Leucyl-tRNA synthetase
TRINITY_DN2968_c0_g1_i21	4	#N/A	K02835	prfA, MTRF1, MRF1	Protein chain release factor A
TRINITY_DN4130_c0_g1_i8	6	GO:0006811	K08720	ompU	Outer membrane protein (porin)
TRINITY_DN1895_c0_g1_i195	1	#N/A	K01869	LARS, leuS	Leucyl-tRNA synthetase
TRINITY_DN7727_c0_g1_i47	3	#N/A	NA	NA	NA
TRINITY_DN93_c0_g1_i19	5	#N/A	NA	NA	NA
TRINITY_DN6118_c0_g1_i84	3	#N/A	K07127	uraH, pucM, hiuH	5-hydroxyisourate hydrolase (purine catabolism), transthyretin-related family
TRINITY_DN36625_c0_g2_i1	1	#N/A	K02355	fusA, GFM, EFG	Translation elongation factor EF-G, a GTPase
TRINITY_DN10640_c0_g3_i2	1	#N/A	K04078	groES, HSPE1	Co-chaperonin GroES (HSP10)
TRINITY_DN9349_c2_g2_i4	5	#N/A	K02355	fusA, GFM, EFG	Translation elongation factor EF-G, a GTPase
TRINITY_DN2002_c0_g1_i7	3	#N/A	NA	NA	NA
TRINITY_DN20287_c0_g1_i39	5	#N/A	NA	NA	Threonine dehydratase
TRINITY_DN356_c0_g1_i29	4	#N/A	K18335	K18335	NAD(P)-dependent dehydrogenase, short-chain alcohol dehydrogenase family
TRINITY_DN6118_c0_g1_i46	1	#N/A	K07127	uraH, pucM, hiuH	5-hydroxyisourate hydrolase (purine catabolism), transthyretin-related family
TRINITY_DN16460_c0_g1_i9	2	#N/A	NA	NA	Aspartyl-tRNA synthetase
TRINITY_DN5870_c0_g1_i19	4	#N/A	NA	NA	NA
TRINITY_DN134530_c0_g1_i1	1	#N/A	K08301	rng, cafA	Ribonuclease G or E
TRINITY_DN11668_c0_g1_i2	1	#N/A	K02886	RP-L2, MRPL2, rplB	Ribosomal protein L2
TRINITY_DN25077_c0_g1_i1	3	#N/A	K00962	pnp, PNPT1	Polyribonucleotide nucleotidyltransferase (polynucleotide phosphorylase)
TRINITY_DN1895_c0_g1_i15	1	#N/A	K01869	LARS, leuS	Leucyl-tRNA synthetase
TRINITY_DN43416_c0_g1_i2	6	#N/A	K04043	dnaK, HSPA9	Molecular chaperone DnaK (HSP70)
TRINITY_DN4130_c0_g1_i29	6	GO:0055085	K08720	ompU	Outer membrane protein (porin)
TRINITY_DN6118_c0_g1_i34	5	#N/A	K07127	uraH, pucM, hiuH	5-hydroxyisourate hydrolase (purine catabolism), transthyretin-related family
TRINITY_DN61210_c0_g1_i1	1	#N/A	K02867	RP-L11, MRPL11, rplK	Ribosomal protein L11
TRINITY_DN11668_c0_g2_i1	1	#N/A	K02906	RP-L3, MRPL3, rplC	Ribosomal protein L3
TRINITY_DN16955_c0_g1_i1	1	#N/A	K02601	nusG	Transcription antitermination factor NusG
TRINITY_DN31247_c0_g1_i1	1	#N/A	K02874	RP-L14, MRPL14, rplN	Ribosomal protein L14
TRINITY_DN10640_c0_g3_i4	1	#N/A	K04077	groEL, HSPD1	Chaperonin GroEL (HSP60 family)
TRINITY_DN34530_c0_g2_i3	1	#N/A	K02935	RP-L7, MRPL12, rplL	Ribosomal protein L7/L12
TRINITY_DN93_c1_g1_i38	4	#N/A	NA	NA	NA
TRINITY_DN57683_c0_g1_i1	1	#N/A	K09969	aapJ, bztA	ABC-type amino acid transport/signal transduction system, periplasmic component/domain
TRINITY_DN27130_c0_g1_i1	5	#N/A	K02113	ATPF1D, atpH	FoF1-type ATP synthase, delta subunit
TRINITY_DN14592_c0_g1_i8	1	#N/A	K02111	ATPF1A, atpA	FoF1-type ATP synthase, alpha subunit
TRINITY_DN7202_c0_g1_i12	6	#N/A	K00015	gyaR, GOR1	Lactate dehydrogenase or related 2-hydroxyacid dehydrogenase
TRINITY_DN1450_c0_g1_i5	6	#N/A	NA	NA	NA
TRINITY_DN119996_c0_g1_i1	2	#N/A	K02909	RP-L31, rpmE	Ribosomal protein L31
TRINITY_DN133887_c0_g1_i1	3	#N/A	K02879	RP-L17, MRPL17, rplQ	Ribosomal protein L17
TRINITY_DN30777_c0_g4_i1	1	#N/A	K02111	ATPF1A, atpA	FoF1-type ATP synthase, alpha subunit
TRINITY_DN46743_c0_g1_i1	1	#N/A	K02988	RP-S5, MRPS5, rpsE	Ribosomal protein S5
TRINITY_DN49577_c0_g1_i1	1	#N/A	K02863	RP-L1, MRPL1, rplA	Ribosomal protein L1
TRINITY_DN50205_c0_g1_i1	1	#N/A	K02945	RP-S1, rpsA	Ribosomal protein S1
TRINITY_DN23544_c0_g1_i4	1	#N/A	K02874	RP-L14, MRPL14, rplN	Ribosomal protein L14
TRINITY_DN33069_c0_g1_i3	2	#N/A	K02895	RP-L24, MRPL24, rplX	Ribosomal protein L24
TRINITY_DN9349_c2_g5_i2	2	#N/A	K02886	RP-L2, MRPL2, rplB	Ribosomal protein L2
TRINITY_DN9349_c2_g5_i3	1	#N/A	K02886	RP-L2, MRPL2, rplB	Ribosomal protein L2
TRINITY_DN136069_c0_g1_i1	1	#N/A	K02904	RP-L29, rpmC	Ribosomal protein L29
TRINITY_DN134936_c0_g1_i1	1	#N/A	K02982	RP-S3, rpsC	Ribosomal protein S3
TRINITY_DN23939_c0_g1_i1	5	#N/A	K00381	cysI	Sulfite reductase, beta subunit (hemoprotein)
TRINITY_DN25193_c0_g1_i1	1	#N/A	K02111	ATPF1A, atpA	FoF1-type ATP synthase, alpha subunit
TRINITY_DN22119_c0_g1_i14	5	#N/A	K02355	fusA, GFM, EFG	Translation elongation factor EF-G, a GTPase
TRINITY_DN25279_c0_g1_i1	1	#N/A	K03043	rpoB	DNA-directed RNA polymerase, beta subunit/140 kD subunit
TRINITY_DN53629_c0_g1_i2	1	#N/A	K02990	RP-S6, MRPS6, rpsF	Ribosomal protein S6
TRINITY_DN34709_c0_g8_i1	1	#N/A	K02950	RP-S12, MRPS12, rpsL	Ribosomal protein S12
TRINITY_DN4090_c1_g1_i1	1	#N/A	K03696	clpC	ATP-dependent Clp protease ATP-binding subunit ClpA
TRINITY_DN18309_c0_g4_i1	1	#N/A	K02878	RP-L16, MRPL16, rplP	Ribosomal protein L16/L10AE
TRINITY_DN48251_c0_g1_i2	1	#N/A	K03046	rpoC	Biotin carboxyl carrier protein
TRINITY_DN24948_c0_g1_i2	1	#N/A	K02874	RP-L14, MRPL14, rplN	Ribosomal protein L14
TRINITY_DN12907_c1_g1_i8	1	#N/A	K02992	RP-S7, MRPS7, rpsG	Ribosomal protein S7
TRINITY_DN51615_c0_g1_i1	5	#N/A	K02952	RP-S13, rpsM	Ribosomal protein S13
TRINITY_DN50347_c1_g1_i1	4	GO:0010951	#N/A	#N/A	#N/A
TRINITY_DN1418_c0_g1_i40	4	#N/A	NA	NA	NA
TRINITY_DN9054_c0_g1_i1	5	#N/A	K18334	fucD	L-alanine-DL-glutamate epimerase or related enzyme of enolase superfamily
TRINITY_DN112199_c0_g1_i1	1	#N/A	NA	NA	NA
TRINITY_DN137444_c0_g1_i1	1	#N/A	K02907	RP-L30, MRPL30, rpmD	Ribosomal protein L30/L7E
TRINITY_DN132802_c0_g1_i1	2	#N/A	K02879	RP-L17, MRPL17, rplQ	Ribosomal protein L17
TRINITY_DN112066_c0_g1_i1	1	#N/A	K02986	RP-S4, rpsD	Ribosomal protein S4 or related protein
TRINITY_DN133685_c0_g1_i1	1	#N/A	K03040	rpoA	DNA-directed RNA polymerase, alpha subunit/40 kD subunit
TRINITY_DN20619_c0_g1_i6	1	#N/A	K02935	RP-L7, MRPL12, rplL	Ribosomal protein L7/L12
TRINITY_DN21887_c0_g1_i2	3	#N/A	K03043	rpoB	DNA-directed RNA polymerase, beta subunit/140 kD subunit
TRINITY_DN56661_c0_g1_i1	1	#N/A	K02899	RP-L27, MRPL27, rpmA	Ribosomal protein L27
TRINITY_DN63997_c0_g1_i1	1	#N/A	K02906	RP-L3, MRPL3, rplC	Ribosomal protein L3
TRINITY_DN11764_c0_g1_i1	1	#N/A	K02078	acpP	Acyl carrier protein
TRINITY_DN44999_c0_g1_i1	1	#N/A	K03046	rpoC	DNA-directed RNA polymerase, beta' subunit/160 kD subunit
TRINITY_DN27091_c1_g1_i1	1	#N/A	K02904	RP-L29, rpmC	Ribosomal protein L29
TRINITY_DN9349_c0_g2_i1	1	#N/A	K02355	fusA, GFM, EFG	Translation elongation factor EF-G, a GTPase
TRINITY_DN8210_c0_g1_i8	1	#N/A	NA	NA	TRAP-type mannitol/chloroaromatic compound transport system, periplasmic component
TRINITY_DN50127_c0_g1_i1	2	#N/A	K03046	rpoC	NA
TRINITY_DN5921_c0_g2_i1	5	#N/A	#N/A	#N/A	#N/A
TRINITY_DN16040_c0_g4_i1	6	#N/A	#N/A	#N/A	#N/A
TRINITY_DN5036_c0_g1_i27	6	#N/A	K12255	gbuA	Arginase family enzyme
TRINITY_DN40904_c0_g1_i1	1	#N/A	K10543	xylF	ABC-type xylose transport system, periplasmic component
TRINITY_DN6241_c0_g1_i6	1	#N/A	NA	NA	NA
TRINITY_DN2943_c0_g1_i9	3	#N/A	K01133	betC	Arylsulfatase A or related enzyme
TRINITY_DN10640_c0_g3_i6	4	#N/A	K04077	groEL, HSPD1	Chaperonin GroEL (HSP60 family)
TRINITY_DN127697_c0_g1_i1	2	#N/A	K02878	RP-L16, MRPL16, rplP	Ribosomal protein L16/L10AE
TRINITY_DN30592_c1_g1_i1	1	#N/A	K02867	RP-L11, MRPL11, rplK	Ribosomal protein L11
TRINITY_DN56010_c0_g1_i2	1	#N/A	K02518	infA	Translation initiation factor IF-1
TRINITY_DN22119_c0_g1_i8	2	#N/A	K02358	tuf, TUFM	Translation elongation factor EF-Tu, a GTPase
TRINITY_DN62096_c0_g1_i1	1	#N/A	K03040	rpoA	DNA-directed RNA polymerase, alpha subunit/40 kD subunit
TRINITY_DN65354_c0_g1_i1	1	#N/A	K02996	RP-S9, MRPS9, rpsI	Ribosomal protein S9
TRINITY_DN46732_c0_g1_i1	1	#N/A	K02933	RP-L6, MRPL6, rplF	Ribosomal protein L6P/L9E
TRINITY_DN20641_c2_g1_i1	5	#N/A	K02945	RP-S1, rpsA	Ribosomal protein S1
TRINITY_DN97384_c0_g1_i1	1	#N/A	K08301	rng, cafA	Ribonuclease G or E
TRINITY_DN10101_c0_g1_i4	3	#N/A	K02884	RP-L19, MRPL19, rplS	Ribosomal protein L19
TRINITY_DN39066_c0_g1_i1	1	#N/A	K02939	RP-L9, MRPL9, rplI	Ribosomal protein L9
TRINITY_DN34709_c2_g1_i1	1	#N/A	K02992	RP-S7, MRPS7, rpsG	Ribosomal protein S7
TRINITY_DN34530_c0_g3_i1	5	#N/A	K02935	RP-L7, MRPL12, rplL	Ribosomal protein L7/L12
TRINITY_DN34383_c0_g3_i1	1	#N/A	K02864	RP-L10, MRPL10, rplJ	Ribosomal protein L10
TRINITY_DN34383_c0_g4_i1	2	#N/A	K03043	rpoB	DNA-directed RNA polymerase, beta subunit/140 kD subunit
TRINITY_DN34958_c0_g1_i1	1	#N/A	K02952	RP-S13, rpsM	Ribosomal protein S13
TRINITY_DN47752_c0_g1_i2	5	#N/A	K02996	RP-S9, MRPS9, rpsI	Ribosomal protein S9
TRINITY_DN77210_c0_g1_i1	5	#N/A	K02897	RP-L25, rplY	Ribosomal protein L25 (general stress protein Ctc)
TRINITY_DN47312_c0_g1_i2	1	#N/A	K02945	RP-S1, rpsA	Ribosomal protein S1
TRINITY_DN12535_c0_g1_i6	6	#N/A	NA	NA	Tripartite-type tricarboxylate transporter, receptor component TctC
TRINITY_DN26788_c0_g1_i1	1	#N/A	K03076	secY	Preprotein translocase subunit SecY
TRINITY_DN24048_c0_g2_i1	1	#N/A	K02945	RP-S1, rpsA	Ribosomal protein S1
TRINITY_DN16955_c0_g2_i9	1	#N/A	K02358	tuf, TUFM	Translation elongation factor EF-Tu, a GTPase
TRINITY_DN16955_c0_g3_i3	1	#N/A	K02601	nusG	Transcription antitermination factor NusG
TRINITY_DN32322_c0_g1_i1	6	#N/A	K02275	coxB, ctaC	Heme/copper-type cytochrome/quinol oxidase, subunit 2
TRINITY_DN79134_c0_g1_i1	1	#N/A	K02948	RP-S11, MRPS11, rpsK	Ribosomal protein S11
TRINITY_DN20380_c0_g1_i12	4	GO:0010951	#N/A	#N/A	#N/A
TRINITY_DN16040_c1_g2_i1	6	GO:0010951	#N/A	#N/A	#N/A
TRINITY_DN24744_c0_g1_i1	6	GO:0007165	#N/A	#N/A	#N/A
TRINITY_DN50347_c0_g1_i29	6	GO:0035821	#N/A	#N/A	#N/A
TRINITY_DN39814_c0_g2_i1	4	#N/A	K00015	gyaR, GOR1	Lactate dehydrogenase or related 2-hydroxyacid dehydrogenase
TRINITY_DN4130_c0_g1_i12	5	#N/A	K08720	ompU	Outer membrane protein (porin)
TRINITY_DN18309_c0_g2_i1	1	#N/A	K02982	RP-S3, rpsC	Ribosomal protein S3
TRINITY_DN3495_c0_g4_i3	2	#N/A	K21624	c3lhypd	L-alanine-DL-glutamate epimerase or related enzyme of enolase superfamily
TRINITY_DN50582_c0_g1_i1	2	#N/A	K02887	RP-L20, MRPL20, rplT	Ribosomal protein L20
TRINITY_DN59087_c0_g3_i1	1	#N/A	K02945	RP-S1, rpsA	Ribosomal protein S1
TRINITY_DN27502_c0_g1_i1	1	#N/A	K09969	aapJ, bztA	ABC-type amino acid transport/signal transduction system, periplasmic component/domain
TRINITY_DN18309_c0_g2_i3	1	#N/A	K02982	RP-S3, rpsC	Ribosomal protein S3
TRINITY_DN27087_c0_g3_i1	1	#N/A	K02931	RP-L5, MRPL5, rplE	Ribosomal protein L5
TRINITY_DN34709_c0_g2_i3	1	#N/A	K02992	RP-S7, MRPS7, rpsG	Ribosomal protein S7
TRINITY_DN39400_c0_g1_i25	5	GO:0019072	#N/A	#N/A	#N/A
TRINITY_DN59087_c0_g3_i2	1	#N/A	K02945	RP-S1, rpsA	Ribosomal protein S1
TRINITY_DN2011_c0_g1_i11	6	#N/A	K07305	msrB	Peptide methionine sulfoxide reductase MsrB
TRINITY_DN1450_c0_g1_i13	5	#N/A	K01847	MUT	Methylmalonyl-CoA mutase, N-terminal domain/subunit
TRINITY_DN122428_c0_g1_i1	1	#N/A	K04077	groEL, HSPD1	Chaperonin GroEL (HSP60 family)
TRINITY_DN137227_c0_g1_i1	1	#N/A	K00031	IDH1, IDH2, icd	Isocitrate dehydrogenase
TRINITY_DN137795_c0_g1_i1	1	#N/A	K01890	FARSB, pheT	Phenylalanyl-tRNA synthetase beta subunit
TRINITY_DN120722_c0_g1_i1	1	#N/A	K02996	RP-S9, MRPS9, rpsI	Ribosomal protein S9
TRINITY_DN120785_c0_g1_i1	5	#N/A	K02956	RP-S15, MRPS15, rpsO	Ribosomal protein S15P/S13E
TRINITY_DN119877_c0_g1_i1	1	#N/A	K02111	ATPF1A, atpA	FoF1-type ATP synthase, alpha subunit
TRINITY_DN104896_c0_g1_i1	5	#N/A	NA	NA	Outer membrane protein OmpA and related peptidoglycan-associated (lipo)proteins
TRINITY_DN136514_c0_g1_i1	1	#N/A	K02355	fusA, GFM, EFG	Translation elongation factor EF-G, a GTPase
TRINITY_DN59087_c0_g1_i1	1	#N/A	K02945	RP-S1, rpsA	Ribosomal protein S1
TRINITY_DN45285_c0_g1_i2	5	#N/A	K03046	rpoC	DNA-directed RNA polymerase, beta' subunit/160 kD subunit
TRINITY_DN76074_c0_g1_i1	1	#N/A	K03043	rpoB	DNA-directed RNA polymerase, beta subunit/140 kD subunit
TRINITY_DN54211_c0_g1_i1	1	#N/A	K02355	fusA, GFM, EFG	Translation elongation factor EF-G, a GTPase
TRINITY_DN67660_c0_g1_i1	5	#N/A	K09458	fabF, OXSM, CEM1	3-oxoacyl-(acyl-carrier-protein) synthase
TRINITY_DN67149_c0_g1_i1	1	#N/A	K04043	dnaK, HSPA9	Molecular chaperone DnaK (HSP70)
TRINITY_DN25833_c1_g1_i1	4	#N/A	K02358	tuf, TUFM	Translation elongation factor EF-Tu, a GTPase
TRINITY_DN41464_c0_g1_i1	6	#N/A	K02518	infA	Translation initiation factor IF-1
TRINITY_DN66523_c0_g1_i1	5	#N/A	K02994	RP-S8, rpsH	Ribosomal protein S8
TRINITY_DN78845_c0_g1_i1	6	#N/A	K02948	RP-S11, MRPS11, rpsK	Ribosomal protein S11
TRINITY_DN45498_c0_g1_i1	1	#N/A	K02867	RP-L11, MRPL11, rplK	Ribosomal protein L11
TRINITY_DN51056_c0_g1_i1	1	#N/A	K02926	RP-L4, MRPL4, rplD	Ribosomal protein L4
TRINITY_DN43769_c0_g1_i1	1	#N/A	K02952	RP-S13, rpsM	Ribosomal protein S13
TRINITY_DN48875_c0_g1_i1	1	#N/A	K02967	RP-S2, MRPS2, rpsB	Ribosomal protein S2
TRINITY_DN42047_c0_g2_i2	2	#N/A	K04077	groEL, HSPD1	Chaperonin GroEL (HSP60 family)
TRINITY_DN35472_c0_g1_i1	5	#N/A	K02887	RP-L20, MRPL20, rplT	Ribosomal protein L20
TRINITY_DN35442_c1_g1_i1	1	#N/A	K03046	rpoC	NA
TRINITY_DN22819_c0_g1_i1	3	#N/A	K02890	RP-L22, MRPL22, rplV	Ribosomal protein L22
TRINITY_DN52314_c0_g2_i1	1	#N/A	K02965	RP-S19, rpsS	Ribosomal protein S19
TRINITY_DN41924_c1_g2_i1	1	#N/A	K02355	fusA, GFM, EFG	Translation elongation factor EF-G, a GTPase
TRINITY_DN91723_c0_g1_i1	1	#N/A	K02990	RP-S6, MRPS6, rpsF	NA
TRINITY_DN43529_c0_g1_i1	3	#N/A	K03046	rpoC	DNA-directed RNA polymerase, beta' subunit/160 kD subunit
TRINITY_DN49924_c0_g2_i1	2	#N/A	K02982	RP-S3, rpsC	Ribosomal protein S3
TRINITY_DN61954_c0_g1_i1	1	#N/A	K02926	RP-L4, MRPL4, rplD	Ribosomal protein L4
TRINITY_DN53797_c0_g2_i1	3	#N/A	K03043	rpoB	DNA-directed RNA polymerase, beta subunit/140 kD subunit
TRINITY_DN17639_c0_g1_i2	5	#N/A	K03629	recF	Recombinational DNA repair ATPase RecF
TRINITY_DN54455_c0_g2_i1	1	#N/A	K02355	fusA, GFM, EFG	Translation elongation factor EF-G, a GTPase
TRINITY_DN42229_c0_g2_i2	1	#N/A	K03040	rpoA	DNA-directed RNA polymerase, alpha subunit/40 kD subunit
TRINITY_DN9349_c2_g3_i1	1	#N/A	K02982	RP-S3, rpsC	Ribosomal protein S3
TRINITY_DN36625_c0_g3_i1	1	#N/A	K02992	RP-S7, MRPS7, rpsG	Ribosomal protein S7
TRINITY_DN93248_c0_g1_i1	3	#N/A	K00640	cysE	Serine acetyltransferase
TRINITY_DN15913_c0_g1_i11	1	#N/A	#N/A	#N/A	#N/A
TRINITY_DN54543_c0_g1_i1	5	#N/A	#N/A	#N/A	#N/A
TRINITY_DN1548_c11_g1_i1	6	#N/A	#N/A	#N/A	#N/A
TRINITY_DN49532_c0_g2_i16	1	GO:0051607	#N/A	#N/A	#N/A
TRINITY_DN39400_c0_g1_i27	1	GO:0010951	#N/A	#N/A	#N/A
TRINITY_DN67649_c0_g1_i1	2	#N/A	#N/A	#N/A	#N/A
TRINITY_DN20206_c0_g1_i3	5	GO:0009399	#N/A	#N/A	#N/A
TRINITY_DN49532_c0_g2_i10	5	GO:0071281	#N/A	#N/A	#N/A
TRINITY_DN25411_c0_g3_i4	5	GO:0039663	#N/A	#N/A	#N/A
TRINITY_DN16955_c0_g2_i5	6	#N/A	K02358	tuf, TUFM	Translation elongation factor EF-Tu, a GTPase
TRINITY_DN24469_c0_g1_i10	4	GO:0010951	#N/A	#N/A	#N/A
TRINITY_DN27437_c0_g1_i11	5	#N/A	NA	NA	Transcriptional regulator, contains XRE-family HTH domain
TRINITY_DN17910_c0_g1_i9	3	#N/A	#N/A	#N/A	#N/A
TRINITY_DN24469_c0_g1_i16	6	GO:0010951	#N/A	#N/A	#N/A
TRINITY_DN30756_c0_g1_i2	6	#N/A	K02027	ABC.MS.S	ABC-type glycerol-3-phosphate transport system, periplasmic component
TRINITY_DN7630_c0_g1_i12	6	#N/A	NA	NA	NADPH:quinone reductase or related Zn-dependent oxidoreductase
TRINITY_DN39400_c0_g1_i14	3	GO:0006689	#N/A	#N/A	#N/A
TRINITY_DN22119_c0_g1_i15	6	#N/A	K02355	fusA, GFM, EFG	Translation elongation factor EF-G, a GTPase
TRINITY_DN52274_c0_g1_i1	3	#N/A	K02871	RP-L13, MRPL13, rplM	Ribosomal protein L13
TRINITY_DN107985_c0_g1_i1	1	#N/A	K05814	ugpA	ABC-type sugar transport system, permease component
TRINITY_DN105937_c0_g1_i1	1	#N/A	K02110	ATPF0C, atpE	FoF1-type ATP synthase, membrane subunit c/Archaeal/vacuolar-type H+-ATPase, subunit K
TRINITY_DN132907_c0_g1_i1	4	#N/A	K01902	sucD	Succinyl-CoA synthetase, alpha subunit
TRINITY_DN132991_c0_g1_i1	6	#N/A	K00134	GAPDH, gapA	Glyceraldehyde-3-phosphate dehydrogenase/erythrose-4-phosphate dehydrogenase
TRINITY_DN122774_c0_g1_i1	5	#N/A	K03601	xseA	Exonuclease VII, large subunit
TRINITY_DN105695_c0_g1_i1	1	#N/A	K02115	ATPF1G, atpG	FoF1-type ATP synthase, gamma subunit
TRINITY_DN134524_c0_g1_i1	2	#N/A	K02994	RP-S8, rpsH	Ribosomal protein S8
TRINITY_DN107241_c0_g1_i1	1	#N/A	K02112	ATPF1B, atpD	FoF1-type ATP synthase, beta subunit
TRINITY_DN110849_c0_g1_i1	5	#N/A	NA	NA	NA
TRINITY_DN106345_c0_g1_i1	2	#N/A	K00822	E2.6.1.18	Adenosylmethionine-8-amino-7-oxononanoate aminotransferase
TRINITY_DN121349_c0_g1_i1	5	#N/A	K02988	RP-S5, MRPS5, rpsE	Ribosomal protein S5
TRINITY_DN126952_c0_g1_i1	1	#N/A	K02276	coxC, ctaE	NA
TRINITY_DN126606_c0_g1_i1	1	#N/A	K02469	gyrA	DNA gyrase/topoisomerase IV, subunit A
TRINITY_DN121252_c0_g1_i1	5	#N/A	K01647	CS, gltA	Citrate synthase
TRINITY_DN124184_c0_g1_i1	6	#N/A	K00158	E1.2.3.3, poxL	Acetolactate synthase large subunit or other thiamine pyrophosphate-requiring enzyme
TRINITY_DN104738_c0_g1_i1	1	#N/A	NA	NA	TRAP-type C4-dicarboxylate transport system, periplasmic component
TRINITY_DN136972_c0_g1_i1	5	#N/A	K03694	clpA	ATP-dependent Clp protease ATP-binding subunit ClpA
TRINITY_DN136175_c0_g1_i1	2	#N/A	K02874	RP-L14, MRPL14, rplN	Ribosomal protein L14
TRINITY_DN44494_c0_g1_i2	5	#N/A	K02275	coxB, ctaC	Heme/copper-type cytochrome/quinol oxidase, subunit 2
TRINITY_DN30592_c0_g2_i2	1	#N/A	K02601	nusG	Transcription antitermination factor NusG
TRINITY_DN39130_c0_g2_i1	1	#N/A	K02913	RP-L33, MRPL33, rpmG	Ribosomal protein L33
TRINITY_DN91960_c0_g1_i1	1	#N/A	K00616	E2.2.1.2, talA, talB	Transaldolase
TRINITY_DN49234_c0_g1_i1	3	#N/A	K00962	pnp, PNPT1	Polyribonucleotide nucleotidyltransferase (polynucleotide phosphorylase)
TRINITY_DN39590_c0_g1_i1	1	#N/A	K02358	tuf, TUFM	Translation elongation factor EF-Tu, a GTPase
TRINITY_DN54281_c1_g1_i1	1	#N/A	K04077	groEL, HSPD1	Chaperonin GroEL (HSP60 family)
TRINITY_DN37005_c0_g1_i2	2	#N/A	K02945	RP-S1, rpsA	Ribosomal protein S1
TRINITY_DN49475_c0_g2_i1	1	#N/A	K02884	RP-L19, MRPL19, rplS	Ribosomal protein L19
TRINITY_DN63044_c0_g1_i1	1	#N/A	K10543	xylF	ABC-type xylose transport system, periplasmic component
TRINITY_DN94756_c0_g1_i1	1	#N/A	K02916	RP-L35, MRPL35, rpmI	Ribosomal protein L35
TRINITY_DN76831_c0_g1_i1	1	#N/A	K02988	RP-S5, MRPS5, rpsE	Ribosomal protein S5
TRINITY_DN31181_c0_g1_i1	1	#N/A	K02988	RP-S5, MRPS5, rpsE	Ribosomal protein S5
TRINITY_DN66721_c0_g1_i1	6	#N/A	K02277	coxD, ctaF	Cytochrome c oxidase subunit IV
TRINITY_DN30735_c1_g1_i3	1	#N/A	K02965	RP-S19, rpsS	Ribosomal protein S19
TRINITY_DN30701_c0_g2_i1	1	#N/A	K04043	dnaK, HSPA9	Molecular chaperone DnaK (HSP70)
TRINITY_DN49333_c0_g1_i1	6	#N/A	NA	NA	Metal-dependent amidase/aminoacylase/carboxypeptidase
TRINITY_DN20619_c0_g1_i1	1	#N/A	K02935	RP-L7, MRPL12, rplL	Ribosomal protein L7/L12
TRINITY_DN20619_c0_g3_i1	1	#N/A	K02864	RP-L10, MRPL10, rplJ	Ribosomal protein L10
TRINITY_DN34104_c0_g1_i1	3	GO:0006481	NA	NA	NA
TRINITY_DN76983_c0_g1_i1	1	#N/A	K02992	RP-S7, MRPS7, rpsG	Ribosomal protein S7
TRINITY_DN22761_c0_g1_i2	3	#N/A	K04077	groEL, HSPD1	Chaperonin GroEL (HSP60 family)
TRINITY_DN22761_c0_g2_i1	6	#N/A	K04077	groEL, HSPD1	Chaperonin GroEL (HSP60 family)
TRINITY_DN38225_c0_g2_i2	1	#N/A	K02887	RP-L20, MRPL20, rplT	Ribosomal protein L20
TRINITY_DN38225_c0_g3_i2	1	#N/A	K02887	RP-L20, MRPL20, rplT	Ribosomal protein L20
TRINITY_DN41733_c0_g1_i1	5	#N/A	K02876	RP-L15, MRPL15, rplO	Ribosomal protein L15
TRINITY_DN10640_c0_g2_i1	1	#N/A	K04078	groES, HSPE1	Co-chaperonin GroES (HSP10)
TRINITY_DN23783_c0_g1_i1	1	#N/A	K02986	RP-S4, rpsD	Ribosomal protein S4 or related protein
TRINITY_DN45438_c0_g1_i3	4	GO:0006606	NA	NA	NA
TRINITY_DN82818_c0_g1_i1	5	#N/A	K02886	RP-L2, MRPL2, rplB	Ribosomal protein L2
TRINITY_DN66163_c0_g1_i1	5	#N/A	K03040	rpoA	DNA-directed RNA polymerase, alpha subunit/40 kD subunit
TRINITY_DN75289_c0_g1_i1	3	#N/A	K06991	K06991	Predicted dioxygenase of extradiol dioxygenase family
TRINITY_DN56661_c0_g2_i1	1	#N/A	K02888	RP-L21, MRPL21, rplU	Ribosomal protein L21
TRINITY_DN46150_c0_g1_i1	1	#N/A	K03046	rpoC	DNA-directed RNA polymerase, beta' subunit/160 kD subunit
TRINITY_DN93697_c0_g1_i1	1	#N/A	K21395	yiaO	TRAP-type C4-dicarboxylate transport system, periplasmic component
TRINITY_DN15885_c0_g1_i7	6	#N/A	K02035	ABC.PE.S	ABC-type transport system, periplasmic component
TRINITY_DN71653_c0_g1_i1	5	#N/A	K03043	rpoB	DNA-directed RNA polymerase, beta subunit/140 kD subunit
TRINITY_DN60110_c0_g1_i1	1	#N/A	K02886	RP-L2, MRPL2, rplB	Ribosomal protein L2
TRINITY_DN53247_c0_g1_i1	3	#N/A	K03431	glmM	Phosphomannomutase
TRINITY_DN37196_c0_g2_i1	6	#N/A	K11751	ushA	2',3'-cyclic-nucleotide 2'-phosphodiesterase/5'- or 3'-nucleotidase, 5'-nucleotidase family
TRINITY_DN22824_c1_g1_i1	5	#N/A	K02871	RP-L13, MRPL13, rplM	Ribosomal protein L13
TRINITY_DN31950_c0_g1_i1	1	#N/A	K03046	rpoC	NA
TRINITY_DN12729_c0_g1_i1	5	#N/A	K08311	nudH	8-oxo-dGTP pyrophosphatase MutT and related house-cleaning NTP pyrophosphohydrolases, NUDIX family
TRINITY_DN55922_c0_g1_i1	6	#N/A	K00606	panB	Ketopantoate hydroxymethyltransferase
TRINITY_DN52881_c0_g1_i1	2	#N/A	K09969	aapJ, bztA	NA
TRINITY_DN52270_c0_g1_i1	1	#N/A	K02886	RP-L2, MRPL2, rplB	Ribosomal protein L2
TRINITY_DN52391_c0_g1_i2	1	GO:0009228	K15551	tauA	ABC-type nitrate/sulfonate/bicarbonate transport system, periplasmic component
TRINITY_DN41831_c0_g1_i1	1	#N/A	K03046	rpoC	DNA-directed RNA polymerase, beta' subunit/160 kD subunit
TRINITY_DN41924_c0_g1_i3	1	#N/A	K02355	fusA, GFM, EFG	Translation elongation factor EF-G, a GTPase
TRINITY_DN41924_c1_g3_i1	6	#N/A	K02355	fusA, GFM, EFG	Translation elongation factor EF-G, a GTPase
TRINITY_DN82709_c0_g1_i1	5	#N/A	K03046	rpoC	NA
TRINITY_DN27113_c1_g1_i1	5	#N/A	K00020	HIBADH, mmsB	3-hydroxyisobutyrate dehydrogenase or related beta-hydroxyacid dehydrogenase
TRINITY_DN51807_c0_g1_i1	1	#N/A	K01999	livK	ABC-type branched-chain amino acid transport system, periplasmic component
TRINITY_DN92989_c0_g1_i1	1	#N/A	K02881	RP-L18, MRPL18, rplR	Ribosomal protein L18
TRINITY_DN57872_c0_g1_i1	1	#N/A	K02961	RP-S17, MRPS17, rpsQ	Ribosomal protein S17
TRINITY_DN26168_c0_g1_i1	1	#N/A	K02996	RP-S9, MRPS9, rpsI	Ribosomal protein S9
TRINITY_DN49909_c0_g1_i1	6	#N/A	K03046	rpoC	DNA-directed RNA polymerase, beta' subunit/160 kD subunit
TRINITY_DN91199_c0_g1_i1	5	#N/A	K01358	clpP, CLPP	ATP-dependent protease ClpP, protease subunit
TRINITY_DN38576_c0_g1_i2	5	#N/A	K02302	cysG	Siroheme synthase (precorrin-2 oxidase/ferrochelatase domain)
TRINITY_DN23508_c0_g1_i2	1	#N/A	K03040	rpoA	DNA-directed RNA polymerase, alpha subunit/40 kD subunit
TRINITY_DN23544_c0_g1_i6	1	#N/A	K02931	RP-L5, MRPL5, rplE	Ribosomal protein L5
TRINITY_DN94673_c0_g1_i1	1	#N/A	K02863	RP-L1, MRPL1, rplA	Ribosomal protein L1
TRINITY_DN27091_c0_g2_i1	6	#N/A	K02931	RP-L5, MRPL5, rplE	Ribosomal protein L5
TRINITY_DN26278_c0_g1_i1	1	#N/A	K03046	rpoC	DNA-directed RNA polymerase, beta' subunit/160 kD subunit
TRINITY_DN32274_c0_g2_i1	6	#N/A	K03046	rpoC	NA
TRINITY_DN56221_c0_g1_i2	5	GO:0007165	NA	NA	Ribosomal protein S15P/S13E
TRINITY_DN20125_c0_g1_i1	1	#N/A	K02358	tuf, TUFM	Translation elongation factor EF-Tu, a GTPase
TRINITY_DN20125_c7_g1_i1	1	#N/A	K02358	tuf, TUFM	Translation elongation factor EF-Tu, a GTPase
TRINITY_DN51702_c0_g1_i1	5	#N/A	K02276	coxC, ctaE	Heme/copper-type cytochrome/quinol oxidase, subunit 3
TRINITY_DN24048_c0_g1_i1	1	#N/A	K02945	RP-S1, rpsA	Ribosomal protein S1
TRINITY_DN31454_c0_g1_i1	2	#N/A	K02992	RP-S7, MRPS7, rpsG	Ribosomal protein S7
TRINITY_DN56882_c0_g1_i1	1	#N/A	K03043	rpoB	DNA-directed RNA polymerase, beta subunit/140 kD subunit
TRINITY_DN51445_c0_g1_i1	1	#N/A	K02357	tsf, TSFM	Translation elongation factor EF-Ts
TRINITY_DN122849_c0_g1_i1	5	#N/A	K03851	tpa	Adenosylmethionine-8-amino-7-oxononanoate aminotransferase
TRINITY_DN41578_c0_g1_i1	1	#N/A	NA	NA	NADH:ubiquinone oxidoreductase 49 kD subunit (chain D)
TRINITY_DN89446_c0_g1_i1	4	#N/A	K17318	K17318, lplA	ABC-type glycerol-3-phosphate transport system, periplasmic component
TRINITY_DN98236_c0_g1_i1	1	#N/A	#N/A	#N/A	#N/A
TRINITY_DN119808_c0_g1_i1	3	#N/A	#N/A	#N/A	#N/A
TRINITY_DN143842_c0_g1_i1	1	#N/A	#N/A	#N/A	#N/A
TRINITY_DN49532_c0_g2_i2	5	GO:0071281	#N/A	#N/A	#N/A
TRINITY_DN53414_c0_g1_i1	6	#N/A	#N/A	#N/A	#N/A
TRINITY_DN10578_c0_g1_i1	4	GO:0051028	#N/A	#N/A	#N/A
TRINITY_DN43384_c0_g1_i2	1	#N/A	#N/A	#N/A	#N/A
TRINITY_DN143243_c0_g1_i1	6	#N/A	#N/A	#N/A	#N/A
TRINITY_DN13306_c0_g2_i1	6	GO:0010951	#N/A	#N/A	#N/A
TRINITY_DN15103_c0_g1_i2	4	GO:0010951	#N/A	#N/A	#N/A
TRINITY_DN53658_c1_g1_i2	1	GO:0016032	#N/A	#N/A	#N/A
TRINITY_DN25613_c0_g1_i5	3	GO:0007165	#N/A	#N/A	#N/A
TRINITY_DN26931_c0_g1_i4	1	GO:0046718	#N/A	#N/A	#N/A
TRINITY_DN8989_c1_g1_i1	6	GO:0039592	#N/A	#N/A	#N/A
TRINITY_DN30466_c0_g2_i1	4	#N/A	#N/A	#N/A	#N/A
TRINITY_DN12082_c0_g2_i8	5	GO:0044179	#N/A	#N/A	#N/A
TRINITY_DN11258_c0_g1_i2	1	#N/A	#N/A	#N/A	#N/A
TRINITY_DN15137_c0_g1_i1	6	#N/A	#N/A	#N/A	#N/A
TRINITY_DN119666_c0_g1_i1	1	#N/A	#N/A	#N/A	#N/A
TRINITY_DN80182_c0_g1_i1	3	#N/A	#N/A	#N/A	#N/A
TRINITY_DN6241_c0_g1_i7	5	#N/A	NA	NA	NA
TRINITY_DN468_c0_g1_i4	3	GO:0039554	#N/A	#N/A	#N/A
TRINITY_DN27357_c0_g1_i2	5	#N/A	#N/A	#N/A	#N/A
TRINITY_DN7202_c0_g1_i4	1	#N/A	K00015	gyaR, GOR1	Lactate dehydrogenase or related 2-hydroxyacid dehydrogenase
TRINITY_DN19271_c0_g1_i2	1	#N/A	K02860	rimM	Ribosomal 30S subunit maturation factor RimM, required for 16S rRNA processing
TRINITY_DN30130_c0_g1_i18	1	#N/A	#N/A	#N/A	#N/A
TRINITY_DN19353_c0_g1_i3	1	GO:0035821	#N/A	#N/A	#N/A
TRINITY_DN16955_c0_g2_i7	1	#N/A	K02358	tuf, TUFM	Translation elongation factor EF-Tu, a GTPase
TRINITY_DN3782_c0_g1_i10	4	GO:0019856	NA	NA	NA
TRINITY_DN30130_c0_g1_i3	1	#N/A	#N/A	#N/A	#N/A
TRINITY_DN27437_c0_g1_i13	5	#N/A	K00768	E2.4.2.21, cobU, cobT	NaMN:DMB phosphoribosyltransferase
TRINITY_DN39400_c0_g1_i11	3	GO:0006689	#N/A	#N/A	#N/A
TRINITY_DN40904_c0_g1_i2	1	#N/A	K10543	xylF	ABC-type xylose transport system, periplasmic component
TRINITY_DN30130_c0_g1_i24	3	#N/A	#N/A	#N/A	#N/A
TRINITY_DN118248_c0_g1_i1	1	#N/A	K01902	sucD	Succinyl-CoA synthetase, alpha subunit
TRINITY_DN121195_c0_g1_i1	5	#N/A	K02886	RP-L2, MRPL2, rplB	Ribosomal protein L2
TRINITY_DN121171_c0_g1_i1	3	#N/A	K02916	RP-L35, MRPL35, rpmI	Ribosomal protein L35
TRINITY_DN127159_c0_g1_i1	1	#N/A	K02112	ATPF1B, atpD	FoF1-type ATP synthase, beta subunit
TRINITY_DN133082_c0_g1_i1	3	#N/A	K01770	ispF	2C-methyl-D-erythritol 2,4-cyclodiphosphate synthase
TRINITY_DN138370_c0_g1_i1	1	#N/A	K00962	pnp, PNPT1	Polyribonucleotide nucleotidyltransferase (polynucleotide phosphorylase)
TRINITY_DN106128_c0_g1_i1	1	#N/A	K00528	fpr	Ferredoxin-NADP reductase
TRINITY_DN111405_c0_g1_i1	5	#N/A	K03046	rpoC	DNA-directed RNA polymerase, beta' subunit/160 kD subunit
TRINITY_DN109470_c0_g1_i1	1	#N/A	K02078	acpP	Acyl carrier protein
TRINITY_DN128559_c0_g1_i1	1	#N/A	K02863	RP-L1, MRPL1, rplA	Ribosomal protein L1
TRINITY_DN107665_c0_g1_i1	1	GO:0055085	K02027	ABC.MS.S	ABC-type glycerol-3-phosphate transport system, periplasmic component
TRINITY_DN109947_c0_g1_i1	4	#N/A	K02601	nusG	Transcription antitermination factor NusG
TRINITY_DN132942_c0_g1_i1	6	#N/A	K00281	GLDC, gcvP	Glycine cleavage system protein P (pyridoxal-binding), C-terminal domain
TRINITY_DN121509_c0_g1_i1	4	#N/A	K00789	metK	S-adenosylmethionine synthetase
TRINITY_DN105651_c0_g1_i1	1	#N/A	NA	NA	NADH:ubiquinone oxidoreductase subunit 4 (chain M)
TRINITY_DN122918_c0_g1_i1	6	#N/A	K03043	rpoB	DNA-directed RNA polymerase, beta subunit/140 kD subunit
TRINITY_DN122947_c0_g1_i1	1	#N/A	K03075	secG	Preprotein translocase subunit SecG
TRINITY_DN121417_c0_g1_i1	5	#N/A	K02959	RP-S16, MRPS16, rpsP	Ribosomal protein S16
TRINITY_DN133421_c0_g1_i1	1	#N/A	K01915	glnA, GLUL	Glutamine synthetase
TRINITY_DN144542_c0_g1_i1	5	#N/A	K02837	prfC	Peptide chain release factor RF-3
TRINITY_DN104860_c0_g1_i1	3	#N/A	K02871	RP-L13, MRPL13, rplM	Ribosomal protein L13
TRINITY_DN123258_c0_g1_i1	5	#N/A	K02793	manXa	Phosphotransferase system, mannose/fructose-specific component IIA
TRINITY_DN126964_c0_g1_i1	3	#N/A	NA	NA	Uncharacterized membrane protein
TRINITY_DN127053_c0_g1_i1	1	#N/A	K09014	sufB	Fe-S cluster assembly scaffold protein SufB
TRINITY_DN127048_c0_g1_i1	3	#N/A	K02520	infC, MTIF3	Translation initiation factor IF-3
TRINITY_DN122597_c0_g1_i1	5	#N/A	K02357	tsf, TSFM	Translation elongation factor EF-Ts
TRINITY_DN106091_c0_g1_i1	5	#N/A	K04077	groEL, HSPD1	Chaperonin GroEL (HSP60 family)
TRINITY_DN134950_c0_g1_i1	5	#N/A	K02992	RP-S7, MRPS7, rpsG	Ribosomal protein S7
TRINITY_DN123651_c0_g1_i1	5	#N/A	K02115	ATPF1G, atpG	FoF1-type ATP synthase, gamma subunit
TRINITY_DN104591_c0_g1_i1	4	#N/A	K24158	prx	Alkyl hydroperoxide reductase subunit AhpC (peroxiredoxin)
TRINITY_DN118956_c0_g1_i1	6	#N/A	K01142	E3.1.11.2, xthA	Exonuclease III
TRINITY_DN108082_c0_g1_i1	3	#N/A	K00525	E1.17.4.1A, nrdA, nrdE	Ribonucleotide reductase alpha subunit
TRINITY_DN132737_c0_g1_i1	5	#N/A	K02887	RP-L20, MRPL20, rplT	Ribosomal protein L20
TRINITY_DN135652_c0_g1_i1	1	#N/A	K04077	groEL, HSPD1	Chaperonin GroEL (HSP60 family)
TRINITY_DN107455_c0_g1_i1	1	#N/A	K03043	rpoB	DNA-directed RNA polymerase, beta subunit/140 kD subunit
TRINITY_DN135795_c0_g1_i1	3	GO:0051603	NA	NA	Uncharacterized conserved protein YcfJ, contains glycine zipper 2TM domain
TRINITY_DN140142_c0_g1_i1	5	#N/A	K00413	CYC1, CYT1, petC	Cytochrome c1
TRINITY_DN135261_c0_g1_i1	6	#N/A	K02948	RP-S11, MRPS11, rpsK	Ribosomal protein S11
TRINITY_DN105375_c0_g1_i1	5	#N/A	K02874	RP-L14, MRPL14, rplN	Ribosomal protein L14
TRINITY_DN133870_c0_g1_i1	5	#N/A	K02946	RP-S10, MRPS10, rpsJ	Ribosomal protein S10
TRINITY_DN136725_c0_g1_i1	1	#N/A	K02035	ABC.PE.S	ABC-type transport system, periplasmic component
TRINITY_DN48000_c0_g1_i1	1	#N/A	K03545	tig	FKBP-type peptidyl-prolyl cis-trans isomerase (trigger factor)
TRINITY_DN16115_c0_g1_i1	1	#N/A	K02945	RP-S1, rpsA	Ribosomal protein S1
TRINITY_DN33741_c0_g1_i1	1	#N/A	K03040	rpoA	DNA-directed RNA polymerase, alpha subunit/40 kD subunit
TRINITY_DN61106_c0_g1_i1	5	#N/A	K02994	RP-S8, rpsH	Ribosomal protein S8
TRINITY_DN54543_c0_g2_i1	6	#N/A	K18990	vexE	Multidrug resistance efflux pump
TRINITY_DN69173_c0_g1_i1	1	#N/A	K03522	fixB, etfA	Electron transfer flavoprotein, alpha subunit
TRINITY_DN92241_c0_g1_i1	1	#N/A	K01358	clpP, CLPP	ATP-dependent protease ClpP, protease subunit
TRINITY_DN9781_c0_g1_i1	1	#N/A	K02892	RP-L23, MRPL23, rplW	Ribosomal protein L23
TRINITY_DN76003_c0_g1_i1	1	#N/A	K01681	ACO, acnA	Aconitase A
TRINITY_DN69605_c0_g1_i1	1	#N/A	K02355	fusA, GFM, EFG	Translation elongation factor EF-G, a GTPase
TRINITY_DN54291_c0_g1_i1	4	GO:0006865	K01999	livK	ABC-type branched-chain amino acid transport system, periplasmic component
TRINITY_DN41163_c0_g1_i1	1	#N/A	K02948	RP-S11, MRPS11, rpsK	Ribosomal protein S11
TRINITY_DN13688_c0_g1_i5	2	#N/A	K02935	RP-L7, MRPL12, rplL	Ribosomal protein L7/L12
TRINITY_DN74817_c0_g1_i1	1	#N/A	K00337	nuoH	NADH:ubiquinone oxidoreductase subunit 1 (chain H)
TRINITY_DN77607_c0_g1_i1	3	#N/A	K00059	fabG, OAR1	NAD(P)-dependent dehydrogenase, short-chain alcohol dehydrogenase family
TRINITY_DN51229_c0_g1_i1	1	#N/A	K03043	rpoB	DNA-directed RNA polymerase, beta subunit/140 kD subunit
TRINITY_DN46082_c0_g1_i1	1	#N/A	K02994	RP-S8, rpsH	Ribosomal protein S8
TRINITY_DN70058_c0_g1_i1	1	#N/A	K00134	GAPDH, gapA	Glyceraldehyde-3-phosphate dehydrogenase/erythrose-4-phosphate dehydrogenase
TRINITY_DN76820_c0_g1_i1	1	#N/A	K03040	rpoA	DNA-directed RNA polymerase, alpha subunit/40 kD subunit
TRINITY_DN17889_c0_g2_i2	2	#N/A	K02358	tuf, TUFM	Translation elongation factor EF-Tu, a GTPase
TRINITY_DN67608_c0_g1_i1	5	#N/A	K02876	RP-L15, MRPL15, rplO	Ribosomal protein L15
TRINITY_DN27546_c0_g1_i1	6	#N/A	K04771	degP, htrA	Periplasmic serine protease, S1-C subfamily, contain C-terminal PDZ domain
TRINITY_DN45393_c0_g1_i1	5	#N/A	K03531	ftsZ	Cell division GTPase FtsZ
TRINITY_DN30466_c0_g1_i1	6	#N/A	NA	NA	Ribulose-5-phosphate 4-epimerase/Fuculose-1-phosphate aldolase
TRINITY_DN10855_c0_g1_i5	6	#N/A	K02945	RP-S1, rpsA	Ribosomal protein S1
TRINITY_DN92153_c0_g1_i1	2	#N/A	K02933	RP-L6, MRPL6, rplF	Ribosomal protein L6P/L9E
TRINITY_DN92177_c0_g1_i1	3	GO:0008360	K03286	TC.OOP	NA
TRINITY_DN54056_c0_g1_i1	1	#N/A	K04043	dnaK, HSPA9	Molecular chaperone DnaK (HSP70)
TRINITY_DN63333_c0_g1_i1	5	#N/A	NA	NA	Heme/copper-type cytochrome/quinol oxidase, subunit 1
TRINITY_DN63371_c0_g1_i1	4	#N/A	K19416	yccA	Integral membrane protein, interacts with FtsH
TRINITY_DN42108_c0_g1_i1	1	#N/A	K02867	RP-L11, MRPL11, rplK	Ribosomal protein L11
TRINITY_DN43395_c0_g1_i1	6	#N/A	K02806	ptsN	NA
TRINITY_DN97662_c0_g1_i1	1	#N/A	K02519	infB, MTIF2	Translation initiation factor IF-2, a GTPase
TRINITY_DN27357_c0_g1_i7	1	#N/A	K01782	fadJ	3-hydroxyacyl-CoA dehydrogenase
TRINITY_DN27399_c1_g4_i1	6	#N/A	K04043	dnaK, HSPA9	Molecular chaperone DnaK (HSP70)
TRINITY_DN27399_c1_g4_i2	1	#N/A	K04043	dnaK, HSPA9	Molecular chaperone DnaK (HSP70)
TRINITY_DN99229_c0_g1_i1	5	#N/A	K02221	yggT	Uncharacterized conserved protein YggT, Ycf19 family
TRINITY_DN75194_c0_g1_i1	1	#N/A	K02887	RP-L20, MRPL20, rplT	Ribosomal protein L20
TRINITY_DN75014_c0_g1_i1	1	#N/A	K03798	ftsH, hflB	ATP-dependent Zn proteases
TRINITY_DN74790_c0_g1_i1	5	#N/A	K03046	rpoC	DNA-directed RNA polymerase, beta' subunit/160 kD subunit
TRINITY_DN49588_c0_g1_i1	6	#N/A	K03043	rpoB	DNA-directed RNA polymerase, beta subunit/140 kD subunit
TRINITY_DN78205_c0_g1_i1	1	#N/A	K00627	DLAT, aceF, pdhC	Pyruvate/2-oxoglutarate dehydrogenase complex, dihydrolipoamide acyltransferase (E2) component
TRINITY_DN58034_c0_g1_i1	3	#N/A	K02899	RP-L27, MRPL27, rpmA	Ribosomal protein L27
TRINITY_DN31313_c0_g2_i1	1	#N/A	K02988	RP-S5, MRPS5, rpsE	Ribosomal protein S5
TRINITY_DN38220_c0_g1_i1	5	#N/A	K02967	RP-S2, MRPS2, rpsB	Ribosomal protein S2
TRINITY_DN67814_c0_g1_i1	1	#N/A	K02968	RP-S20, rpsT	Ribosomal protein S20
TRINITY_DN28056_c0_g1_i1	1	#N/A	K03043	rpoB	DNA-directed RNA polymerase, beta subunit/140 kD subunit
TRINITY_DN92704_c0_g1_i1	1	#N/A	K02982	RP-S3, rpsC	Ribosomal protein S3
TRINITY_DN59860_c0_g1_i1	6	#N/A	K02358	tuf, TUFM	Translation elongation factor EF-Tu, a GTPase
TRINITY_DN83665_c0_g1_i1	1	#N/A	K02357	tsf, TSFM	Translation elongation factor EF-Ts
TRINITY_DN37331_c0_g1_i1	5	#N/A	K07390	grxD, GLRX5	Glutaredoxin-related protein
TRINITY_DN60758_c0_g1_i1	1	#N/A	NA	NA	Uncharacterized conserved protein YjiS, DUF1127 family
TRINITY_DN60772_c0_g1_i1	5	#N/A	K02952	RP-S13, rpsM	Ribosomal protein S13
TRINITY_DN34709_c2_g2_i1	3	#N/A	K02355	fusA, GFM, EFG	Translation elongation factor EF-G, a GTPase
TRINITY_DN97469_c0_g1_i1	5	#N/A	K02600	nusA	NA
TRINITY_DN62889_c0_g1_i1	1	#N/A	K03596	lepA	Translation elongation factor EF-4, membrane-bound GTPase
TRINITY_DN34530_c0_g1_i1	5	#N/A	K02863	RP-L1, MRPL1, rplA	Ribosomal protein L1
TRINITY_DN17219_c0_g1_i2	3	#N/A	K07335	bmpA, bmpB, tmpC	Basic membrane lipoprotein Med, periplasmic binding protein (PBP1-ABC) superfamily
TRINITY_DN17219_c0_g1_i3	4	#N/A	K07335	bmpA, bmpB, tmpC	Basic membrane lipoprotein Med, periplasmic binding protein (PBP1-ABC) superfamily
TRINITY_DN63907_c0_g1_i1	5	#N/A	K02035	ABC.PE.S	ABC-type oligopeptide transport system, periplasmic component
TRINITY_DN57534_c0_g1_i1	3	#N/A	K01338	lon	ATP-dependent Lon protease, bacterial type
TRINITY_DN15827_c0_g1_i1	2	#N/A	K02887	RP-L20, MRPL20, rplT	Ribosomal protein L20
TRINITY_DN63864_c0_g1_i1	1	#N/A	K02002	proX	ABC-type proline/glycine betaine transport system, periplasmic component
TRINITY_DN63902_c0_g1_i1	2	#N/A	K03043	rpoB	DNA-directed RNA polymerase, beta subunit/140 kD subunit
TRINITY_DN60115_c0_g1_i1	1	#N/A	K03040	rpoA	DNA-directed RNA polymerase, alpha subunit/40 kD subunit
TRINITY_DN77477_c0_g1_i1	1	GO:0000160	NA	NA	NA
TRINITY_DN53300_c0_g1_i1	1	#N/A	K01999	livK	ABC-type branched-chain amino acid transport system, periplasmic component
TRINITY_DN37192_c0_g1_i1	1	#N/A	K02886	RP-L2, MRPL2, rplB	Ribosomal protein L2
TRINITY_DN19616_c0_g1_i6	1	#N/A	K02114	ATPF1E, atpC	FoF1-type ATP synthase, epsilon subunit
TRINITY_DN45113_c0_g1_i1	3	#N/A	K02078	acpP	Acyl carrier protein
TRINITY_DN35451_c0_g1_i1	1	GO:0017004	NA	NA	Predicted lipid-binding transport protein, Tim44 family
TRINITY_DN35439_c0_g1_i2	6	#N/A	K02946	RP-S10, MRPS10, rpsJ	Ribosomal protein S10
TRINITY_DN46209_c0_g1_i1	1	#N/A	K07335	bmpA, bmpB, tmpC	Basic membrane lipoprotein Med, periplasmic binding protein (PBP1-ABC) superfamily
TRINITY_DN18852_c0_g1_i2	1	#N/A	K02114	ATPF1E, atpC	FoF1-type ATP synthase, epsilon subunit
TRINITY_DN18852_c0_g1_i3	2	#N/A	K02114	ATPF1E, atpC	FoF1-type ATP synthase, epsilon subunit
TRINITY_DN31094_c0_g1_i1	1	#N/A	K01716	fabA	3-hydroxymyristoyl/3-hydroxydecanoyl-(acyl carrier protein) dehydratase
TRINITY_DN56193_c0_g2_i1	4	#N/A	K02355	fusA, GFM, EFG	Translation elongation factor EF-G, a GTPase
TRINITY_DN22866_c0_g1_i1	2	#N/A	K02888	RP-L21, MRPL21, rplU	Ribosomal protein L21
TRINITY_DN31954_c0_g3_i3	1	#N/A	K02959	RP-S16, MRPS16, rpsP	Ribosomal protein S16
TRINITY_DN55297_c0_g2_i1	5	#N/A	K01491	folD	5,10-methylene-tetrahydrofolate dehydrogenase/Methenyl tetrahydrofolate cyclohydrolase
TRINITY_DN55257_c0_g1_i1	5	#N/A	K02939	RP-L9, MRPL9, rplI	Ribosomal protein L9
TRINITY_DN53433_c0_g1_i1	4	GO:0015740	K18989	vexF	Multidrug efflux pump subunit AcrB
TRINITY_DN35350_c0_g1_i1	1	#N/A	K00412	CYTB, petB	Cytochrome b subunit of the bc complex
TRINITY_DN53110_c0_g1_i1	4	#N/A	K02945	RP-S1, rpsA	Ribosomal protein S1
TRINITY_DN57226_c0_g1_i1	6	#N/A	K04043	dnaK, HSPA9	Molecular chaperone DnaK (HSP70)
TRINITY_DN4763_c0_g1_i3	4	#N/A	NA	NA	Xanthine/uracil permease
TRINITY_DN52270_c0_g2_i1	1	#N/A	K02892	RP-L23, MRPL23, rplW	Ribosomal protein L23
TRINITY_DN27792_c0_g5_i1	1	#N/A	K02274	coxA, ctaD	Heme/copper-type cytochrome/quinol oxidase, subunit 1
TRINITY_DN91377_c0_g1_i1	6	#N/A	K02899	RP-L27, MRPL27, rpmA	Ribosomal protein L27
TRINITY_DN27196_c0_g1_i5	4	#N/A	NA	NA	TRAP-type C4-dicarboxylate transport system, periplasmic component
TRINITY_DN32116_c0_g2_i1	5	#N/A	K03782	katG	Catalase (peroxidase I)
TRINITY_DN89396_c0_g1_i1	6	#N/A	K02078	acpP	Acyl carrier protein
TRINITY_DN77274_c0_g1_i1	1	#N/A	K04043	dnaK, HSPA9	Molecular chaperone DnaK (HSP70)
TRINITY_DN33652_c0_g1_i1	6	#N/A	NA	NA	NA
TRINITY_DN33652_c0_g1_i2	5	#N/A	NA	NA	NA
TRINITY_DN81760_c0_g1_i1	5	#N/A	K03639	moaA, CNX2	Molybdenum cofactor biosynthesis enzyme MoaA
TRINITY_DN12907_c0_g2_i2	1	#N/A	K02965	RP-S19, rpsS	Ribosomal protein S19
TRINITY_DN48731_c0_g1_i1	5	#N/A	K00962	pnp, PNPT1	Polyribonucleotide nucleotidyltransferase (polynucleotide phosphorylase)
TRINITY_DN94611_c0_g1_i1	1	#N/A	K03782	katG	Catalase (peroxidase I)
TRINITY_DN94629_c0_g1_i1	1	#N/A	K02274	coxA, ctaD	Heme/copper-type cytochrome/quinol oxidase, subunit 1
TRINITY_DN56362_c0_g1_i1	1	#N/A	K02274	coxA, ctaD	Heme/copper-type cytochrome/quinol oxidase, subunit 1
TRINITY_DN33071_c0_g3_i2	6	#N/A	K02950	RP-S12, MRPS12, rpsL	Ribosomal protein S12
TRINITY_DN53801_c0_g1_i1	1	#N/A	K02276	coxC, ctaE	Heme/copper-type cytochrome/quinol oxidase, subunit 3
TRINITY_DN16485_c1_g1_i2	1	#N/A	K02967	RP-S2, MRPS2, rpsB	Ribosomal protein S2
TRINITY_DN42988_c0_g1_i1	2	#N/A	K02030	ABC.PA.S	ABC-type amino acid transport/signal transduction system, periplasmic component/domain
TRINITY_DN54405_c0_g1_i1	3	#N/A	K04077	groEL, HSPD1	Chaperonin GroEL (HSP60 family)
TRINITY_DN18679_c0_g1_i3	6	#N/A	K02112	ATPF1B, atpD	FoF1-type ATP synthase, beta subunit
TRINITY_DN24096_c0_g1_i1	1	#N/A	K04078	groES, HSPE1	Co-chaperonin GroES (HSP10)
TRINITY_DN16963_c0_g1_i6	6	#N/A	K11688	dctP	TRAP-type C4-dicarboxylate transport system, periplasmic component
TRINITY_DN16955_c1_g1_i1	1	#N/A	K02358	tuf, TUFM	Translation elongation factor EF-Tu, a GTPase
TRINITY_DN33270_c0_g3_i1	1	#N/A	K02358	tuf, TUFM	Translation elongation factor EF-Tu, a GTPase
TRINITY_DN64660_c0_g1_i1	1	#N/A	K03043	rpoB	NA
TRINITY_DN74613_c0_g1_i1	5	#N/A	K00615	E2.2.1.1, tktA, tktB	Transketolase, C-terminal subunit
TRINITY_DN49192_c0_g1_i1	5	#N/A	K18989	vexF	Multidrug efflux pump subunit AcrB
TRINITY_DN32095_c0_g2_i1	5	#N/A	NA	NA	Choline-glycine betaine transporter
TRINITY_DN75827_c0_g1_i1	1	#N/A	K00674	dapD	Tetrahydrodipicolinate N-succinyltransferase
TRINITY_DN16062_c0_g1_i1	6	GO:0006979	K07126	K07126	TPR repeat
TRINITY_DN39949_c0_g2_i1	6	#N/A	K01273	DPEP	Zn-dependent dipeptidase, microsomal dipeptidase homolog
TRINITY_DN32381_c0_g1_i2	5	#N/A	K02518	infA	Translation initiation factor IF-1
TRINITY_DN49699_c0_g1_i2	1	#N/A	K02874	RP-L14, MRPL14, rplN	Ribosomal protein L14
TRINITY_DN44341_c0_g1_i2	1	GO:0015940	K01698	hemB, ALAD	Delta-aminolevulinic acid dehydratase, porphobilinogen synthase
TRINITY_DN94480_c0_g1_i1	1	#N/A	K02519	infB, MTIF2	NA
TRINITY_DN16848_c0_g1_i1	4	#N/A	K02030	ABC.PA.S	ABC-type amino acid transport/signal transduction system, periplasmic component/domain
TRINITY_DN20377_c0_g1_i1	6	#N/A	K02952	RP-S13, rpsM	Ribosomal protein S13
TRINITY_DN129562_c0_g1_i1	1	#N/A	#N/A	#N/A	#N/A
TRINITY_DN15913_c0_g1_i1	1	#N/A	#N/A	#N/A	#N/A
TRINITY_DN19039_c0_g1_i7	6	#N/A	#N/A	#N/A	#N/A
TRINITY_DN114309_c0_g1_i1	1	#N/A	#N/A	#N/A	#N/A
TRINITY_DN72690_c0_g1_i1	4	#N/A	#N/A	#N/A	#N/A
TRINITY_DN32209_c0_g1_i1	6	#N/A	#N/A	#N/A	#N/A
TRINITY_DN36456_c0_g2_i1	4	GO:0006508	#N/A	#N/A	#N/A
TRINITY_DN26415_c0_g1_i2	4	GO:0098003	#N/A	#N/A	#N/A
TRINITY_DN137879_c0_g1_i1	5	#N/A	#N/A	#N/A	#N/A
TRINITY_DN104074_c0_g1_i2	5	#N/A	#N/A	#N/A	#N/A
TRINITY_DN15913_c0_g1_i10	5	#N/A	#N/A	#N/A	#N/A
TRINITY_DN36233_c0_g1_i1	5	#N/A	#N/A	#N/A	#N/A
TRINITY_DN129296_c0_g1_i1	3	#N/A	#N/A	#N/A	#N/A
TRINITY_DN124692_c0_g1_i1	5	#N/A	#N/A	#N/A	#N/A
TRINITY_DN78211_c0_g1_i1	1	#N/A	#N/A	#N/A	#N/A
TRINITY_DN11623_c1_g1_i2	4	GO:0046718	#N/A	#N/A	#N/A
TRINITY_DN67614_c0_g1_i1	4	#N/A	#N/A	#N/A	#N/A
TRINITY_DN109291_c0_g1_i1	1	#N/A	#N/A	#N/A	#N/A
TRINITY_DN23939_c0_g2_i1	6	#N/A	#N/A	#N/A	#N/A
TRINITY_DN15103_c0_g1_i4	6	GO:0010951	#N/A	#N/A	#N/A
TRINITY_DN15103_c0_g2_i18	6	GO:0010951	#N/A	#N/A	#N/A
TRINITY_DN42226_c0_g1_i1	4	#N/A	#N/A	#N/A	#N/A
TRINITY_DN55521_c0_g1_i2	3	#N/A	#N/A	#N/A	#N/A
TRINITY_DN88361_c0_g1_i1	1	#N/A	#N/A	#N/A	#N/A
TRINITY_DN83190_c0_g1_i1	1	#N/A	#N/A	#N/A	#N/A
TRINITY_DN20380_c1_g1_i12	6	#N/A	#N/A	#N/A	#N/A
TRINITY_DN136391_c0_g1_i1	6	#N/A	#N/A	#N/A	#N/A
TRINITY_DN134648_c0_g1_i1	4	#N/A	#N/A	#N/A	#N/A
TRINITY_DN101563_c0_g1_i1	1	#N/A	#N/A	#N/A	#N/A
TRINITY_DN41359_c0_g1_i1	1	#N/A	#N/A	#N/A	#N/A
TRINITY_DN39483_c0_g1_i1	4	#N/A	#N/A	#N/A	#N/A
TRINITY_DN114065_c0_g1_i1	6	#N/A	#N/A	#N/A	#N/A
TRINITY_DN130761_c0_g1_i1	1	#N/A	#N/A	#N/A	#N/A
TRINITY_DN53632_c0_g1_i1	1	#N/A	#N/A	#N/A	#N/A
TRINITY_DN68334_c0_g1_i1	3	#N/A	#N/A	#N/A	#N/A
TRINITY_DN146180_c0_g1_i1	1	#N/A	#N/A	#N/A	#N/A
TRINITY_DN9535_c0_g1_i2	1	#N/A	#N/A	#N/A	#N/A
TRINITY_DN18428_c0_g1_i1	6	GO:0046740	#N/A	#N/A	#N/A
TRINITY_DN103035_c0_g1_i1	1	#N/A	#N/A	#N/A	#N/A
TRINITY_DN27237_c0_g1_i12	6	GO:0010951	#N/A	#N/A	#N/A
TRINITY_DN64212_c0_g1_i1	1	#N/A	#N/A	#N/A	#N/A
TRINITY_DN30665_c0_g1_i2	4	GO:0046718	#N/A	#N/A	#N/A
TRINITY_DN9622_c0_g2_i9	1	GO:0035821	#N/A	#N/A	#N/A
TRINITY_DN63379_c0_g1_i1	5	#N/A	#N/A	#N/A	#N/A
TRINITY_DN84163_c0_g1_i1	1	#N/A	#N/A	#N/A	#N/A
TRINITY_DN42541_c0_g1_i1	3	#N/A	#N/A	#N/A	#N/A
TRINITY_DN18121_c0_g1_i5	1	#N/A	#N/A	#N/A	#N/A
TRINITY_DN140299_c0_g1_i1	5	#N/A	#N/A	#N/A	#N/A
TRINITY_DN141909_c0_g1_i1	5	#N/A	#N/A	#N/A	#N/A
TRINITY_DN49532_c0_g2_i1	3	GO:0006508	#N/A	#N/A	#N/A
TRINITY_DN53534_c0_g1_i4	4	#N/A	#N/A	#N/A	#N/A
TRINITY_DN66750_c0_g1_i1	5	GO:0009313	#N/A	#N/A	#N/A
TRINITY_DN41372_c1_g2_i1	3	#N/A	#N/A	#N/A	#N/A
TRINITY_DN92980_c0_g1_i1	3	#N/A	#N/A	#N/A	#N/A
TRINITY_DN120064_c0_g1_i1	3	#N/A	#N/A	#N/A	#N/A
TRINITY_DN24469_c2_g1_i1	4	#N/A	#N/A	#N/A	#N/A
TRINITY_DN107701_c0_g1_i1	3	#N/A	#N/A	#N/A	#N/A
TRINITY_DN12084_c0_g1_i2	3	GO:0071555	#N/A	#N/A	#N/A
TRINITY_DN133395_c0_g1_i1	4	#N/A	#N/A	#N/A	#N/A
TRINITY_DN41158_c0_g1_i1	1	GO:0017009	#N/A	#N/A	#N/A
TRINITY_DN12082_c0_g2_i6	4	GO:0009102	#N/A	#N/A	#N/A
TRINITY_DN124462_c0_g1_i1	3	#N/A	#N/A	#N/A	#N/A
TRINITY_DN21869_c0_g1_i6	6	#N/A	#N/A	#N/A	#N/A
TRINITY_DN56931_c0_g1_i2	4	#N/A	#N/A	#N/A	#N/A
TRINITY_DN71006_c0_g1_i1	1	#N/A	#N/A	#N/A	#N/A
TRINITY_DN26203_c0_g2_i1	4	GO:0006689	#N/A	#N/A	#N/A
TRINITY_DN53230_c0_g1_i1	1	#N/A	#N/A	#N/A	#N/A
TRINITY_DN131876_c0_g1_i1	1	#N/A	#N/A	#N/A	#N/A
TRINITY_DN55708_c0_g1_i1	3	#N/A	#N/A	#N/A	#N/A
TRINITY_DN59135_c0_g1_i1	1	#N/A	#N/A	#N/A	#N/A
TRINITY_DN51041_c0_g1_i1	6	#N/A	#N/A	#N/A	#N/A
TRINITY_DN108217_c0_g1_i1	1	#N/A	#N/A	#N/A	#N/A
TRINITY_DN63679_c0_g1_i1	6	#N/A	#N/A	#N/A	#N/A
TRINITY_DN143205_c0_g1_i1	1	#N/A	#N/A	#N/A	#N/A
TRINITY_DN65446_c0_g1_i1	4	#N/A	#N/A	#N/A	#N/A
TRINITY_DN78918_c0_g1_i1	1	#N/A	#N/A	#N/A	#N/A
TRINITY_DN12084_c1_g1_i1	6	GO:0006606	#N/A	#N/A	#N/A
TRINITY_DN12082_c0_g2_i9	3	GO:0006508	#N/A	#N/A	#N/A
TRINITY_DN34994_c0_g1_i5	6	GO:0010951	#N/A	#N/A	#N/A
TRINITY_DN112493_c0_g1_i1	1	#N/A	#N/A	#N/A	#N/A
TRINITY_DN12082_c0_g2_i10	3	#N/A	#N/A	#N/A	#N/A
TRINITY_DN4130_c0_g1_i31	5	#N/A	#N/A	#N/A	#N/A
TRINITY_DN23511_c0_g1_i3	4	#N/A	#N/A	#N/A	#N/A
TRINITY_DN12426_c3_g1_i1	1	#N/A	#N/A	#N/A	#N/A
TRINITY_DN33680_c0_g1_i5	6	#N/A	#N/A	#N/A	#N/A
TRINITY_DN29920_c2_g1_i1	1	#N/A	#N/A	#N/A	#N/A
TRINITY_DN80177_c0_g1_i1	6	#N/A	#N/A	#N/A	#N/A
TRINITY_DN43929_c0_g1_i1	1	#N/A	#N/A	#N/A	#N/A
TRINITY_DN68160_c0_g1_i1	1	#N/A	#N/A	#N/A	#N/A
TRINITY_DN81465_c0_g1_i1	1	#N/A	#N/A	#N/A	#N/A
TRINITY_DN18121_c0_g1_i10	4	GO:0071555	#N/A	#N/A	#N/A
TRINITY_DN20380_c2_g1_i1	6	GO:0010951	#N/A	#N/A	#N/A
TRINITY_DN41478_c0_g1_i1	3	#N/A	#N/A	#N/A	#N/A
TRINITY_DN60487_c0_g1_i1	5	#N/A	#N/A	#N/A	#N/A
TRINITY_DN66311_c0_g1_i1	4	#N/A	#N/A	#N/A	#N/A
TRINITY_DN119722_c0_g1_i1	1	#N/A	#N/A	#N/A	#N/A
TRINITY_DN19039_c0_g1_i9	1	#N/A	#N/A	#N/A	#N/A
TRINITY_DN52274_c0_g1_i2	3	#N/A	K02871	RP-L13, MRPL13, rplM	Ribosomal protein L13
TRINITY_DN35468_c0_g1_i1	5	#N/A	NA	NA	NA
TRINITY_DN35468_c0_g1_i2	4	#N/A	K02906	RP-L3, MRPL3, rplC	NA
TRINITY_DN11848_c0_g1_i4	5	#N/A	K07795	tctC	Tripartite-type tricarboxylate transporter, receptor component TctC
TRINITY_DN23511_c0_g1_i2	4	#N/A	#N/A	#N/A	#N/A
TRINITY_DN13732_c0_g1_i4	6	GO:0010951	#N/A	#N/A	#N/A
TRINITY_DN23511_c0_g1_i1	3	#N/A	#N/A	#N/A	#N/A
TRINITY_DN13732_c0_g1_i6	6	GO:0010951	#N/A	#N/A	#N/A
TRINITY_DN5036_c0_g1_i15	4	#N/A	K12255	gbuA	Arginase family enzyme
TRINITY_DN17910_c0_g1_i14	6	#N/A	#N/A	#N/A	#N/A
TRINITY_DN8822_c0_g1_i14	3	GO:0055085	K02002	proX	ABC-type proline/glycine betaine transport system, periplasmic component
TRINITY_DN104211_c0_g1_i1	1	GO:0006468	NA	NA	Uncharacterized conserved protein, LabA/DUF88 family
TRINITY_DN118223_c0_g1_i1	6	#N/A	K02994	RP-S8, rpsH	Ribosomal protein S8
TRINITY_DN123766_c0_g1_i1	3	#N/A	K00412	CYTB, petB	Cytochrome b subunit of the bc complex
TRINITY_DN139074_c0_g1_i1	3	#N/A	K00384	trxB, TRR	Thioredoxin reductase
TRINITY_DN111113_c0_g1_i1	6	#N/A	K03935	NDUFS2	NADH:ubiquinone oxidoreductase 49 kD subunit (chain D)
TRINITY_DN111170_c0_g1_i1	2	#N/A	K00088	IMPDH, guaB	IMP dehydrogenase/GMP reductase
TRINITY_DN121057_c0_g1_i1	3	#N/A	K03040	rpoA	DNA-directed RNA polymerase, alpha subunit/40 kD subunit
TRINITY_DN141148_c0_g1_i1	3	#N/A	K09014	sufB	Fe-S cluster assembly scaffold protein SufB
TRINITY_DN118646_c0_g1_i1	1	#N/A	K03596	lepA	Translation elongation factor EF-4, membrane-bound GTPase
TRINITY_DN120240_c0_g1_i1	1	#N/A	K02115	ATPF1G, atpG	FoF1-type ATP synthase, gamma subunit
TRINITY_DN120232_c0_g1_i1	2	#N/A	K00962	pnp, PNPT1	Ribosomal protein S1
TRINITY_DN117327_c0_g1_i1	2	#N/A	K04043	dnaK, HSPA9	Molecular chaperone DnaK (HSP70)
TRINITY_DN138485_c0_g1_i1	1	#N/A	K02112	ATPF1B, atpD	FoF1-type ATP synthase, beta subunit
TRINITY_DN124340_c0_g1_i1	4	#N/A	K03310	TC.AGCS	Na+/alanine symporter
TRINITY_DN119523_c0_g1_i1	3	#N/A	K02262	COX3	Heme/copper-type cytochrome/quinol oxidase, subunit 3
TRINITY_DN134816_c0_g1_i1	1	#N/A	K15551	tauA	ABC-type taurine transport system, periplasmic component
TRINITY_DN124794_c0_g1_i1	3	#N/A	K02838	frr, MRRF, RRF	Ribosome recycling factor
TRINITY_DN121981_c0_g1_i1	2	#N/A	K03782	katG	Catalase (peroxidase I)
TRINITY_DN110042_c0_g1_i1	5	#N/A	K02001	proW	ABC-type proline/glycine betaine transport system, permease component
TRINITY_DN126887_c0_g1_i1	3	#N/A	K00130	betB, gbsA	Acyl-CoA reductase or other NAD-dependent aldehyde dehydrogenase
TRINITY_DN138804_c0_g1_i1	4	#N/A	K02871	RP-L13, MRPL13, rplM	Ribosomal protein L13
TRINITY_DN140900_c0_g1_i1	2	#N/A	K09458	fabF, OXSM, CEM1	3-oxoacyl-(acyl-carrier-protein) synthase
TRINITY_DN140819_c0_g1_i1	2	#N/A	K01995	livG	ABC-type branched-chain amino acid transport system, ATPase component
TRINITY_DN142440_c0_g1_i1	1	#N/A	K03696	clpC	ATP-dependent Clp protease ATP-binding subunit ClpA
TRINITY_DN118310_c0_g1_i1	5	#N/A	K03521	fixA, etfB	Electron transfer flavoprotein, alpha and beta subunits
TRINITY_DN118378_c0_g1_i1	4	#N/A	K02935	RP-L7, MRPL12, rplL	Ribosomal protein L7/L12
TRINITY_DN138349_c0_g1_i1	6	#N/A	K07258	dacC, dacA, dacD	D-alanyl-D-alanine carboxypeptidase
TRINITY_DN134662_c0_g1_i1	3	#N/A	K03883	ND5	NADH:ubiquinone oxidoreductase subunit 5 (chain L)/Multisubunit Na+/H+ antiporter, MnhA subunit
TRINITY_DN111921_c0_g1_i1	4	#N/A	K04088	hflK	Regulator of protease activity HflC, stomatin/prohibitin superfamily
TRINITY_DN111958_c0_g1_i1	1	#N/A	NA	NA	NA
TRINITY_DN111427_c0_g1_i1	6	#N/A	K00208	fabI	Enoyl-[acyl-carrier-protein] reductase (NADH)
TRINITY_DN112591_c0_g1_i1	1	#N/A	K04043	dnaK, HSPA9	Molecular chaperone DnaK (HSP70)
TRINITY_DN140538_c0_g1_i1	3	#N/A	NA	NA	AAA+-type ATPase, SpoVK/Ycf46/Vps4 family
TRINITY_DN109483_c0_g1_i1	2	#N/A	K00240	sdhB, frdB	Succinate dehydrogenase/fumarate reductase, Fe-S protein subunit
TRINITY_DN119938_c0_g1_i1	2	#N/A	K01255	CARP, pepA	Leucyl aminopeptidase
TRINITY_DN119998_c0_g1_i1	2	#N/A	K06168	miaB	tRNA A37 methylthiotransferase MiaB
TRINITY_DN119990_c0_g1_i1	1	#N/A	K03076	secY	Preprotein translocase subunit SecY
TRINITY_DN128511_c0_g1_i1	4	#N/A	K04077	groEL, HSPD1	Chaperonin GroEL (HSP60 family)
TRINITY_DN134361_c0_g1_i1	1	#N/A	K02916	RP-L35, MRPL35, rpmI	Ribosomal protein L35
TRINITY_DN105824_c0_g1_i1	2	#N/A	NA	NA	Tripartite-type tricarboxylate transporter, receptor component TctC
TRINITY_DN109378_c0_g1_i1	4	#N/A	K04077	groEL, HSPD1	Chaperonin GroEL (HSP60 family)
TRINITY_DN107690_c0_g1_i1	4	#N/A	K00962	pnp, PNPT1	Polyribonucleotide nucleotidyltransferase (polynucleotide phosphorylase)
TRINITY_DN107608_c0_g1_i1	1	#N/A	K03545	tig	FKBP-type peptidyl-prolyl cis-trans isomerase (trigger factor)
TRINITY_DN133186_c0_g1_i1	1	#N/A	K02945	RP-S1, rpsA	Ribosomal protein S1
TRINITY_DN120984_c0_g1_i1	1	#N/A	K02967	RP-S2, MRPS2, rpsB	Ribosomal protein S2
TRINITY_DN120907_c0_g1_i1	1	#N/A	K02535	lpxC	UDP-3-O-acyl-N-acetylglucosamine deacetylase
TRINITY_DN106846_c0_g1_i1	6	#N/A	K24158	prx	Alkyl hydroperoxide reductase subunit AhpC (peroxiredoxin)
TRINITY_DN118587_c0_g1_i1	6	#N/A	K01462	PDF, def	Peptide deformylase
TRINITY_DN141836_c0_g1_i1	2	#N/A	K02871	RP-L13, MRPL13, rplM	Ribosomal protein L13
TRINITY_DN127406_c0_g1_i1	3	#N/A	K22479	argA	Protein N-acetyltransferase, RimJ/RimL family
TRINITY_DN106976_c0_g1_i1	2	#N/A	K02355	fusA, GFM, EFG	Translation elongation factor EF-G, a GTPase
TRINITY_DN105623_c0_g1_i1	1	#N/A	K02948	RP-S11, MRPS11, rpsK	Ribosomal protein S11
TRINITY_DN106710_c0_g1_i1	2	#N/A	K00140	mmsA, iolA, ALDH6A1	Acyl-CoA reductase or other NAD-dependent aldehyde dehydrogenase
TRINITY_DN140088_c0_g1_i1	2	#N/A	K03628	rho	Transcription termination factor Rho
TRINITY_DN114716_c0_g1_i1	6	#N/A	K07335	bmpA, bmpB, tmpC	Basic membrane lipoprotein Med, periplasmic binding protein (PBP1-ABC) superfamily
TRINITY_DN109811_c0_g1_i1	2	#N/A	K02948	RP-S11, MRPS11, rpsK	Ribosomal protein S11
TRINITY_DN112667_c0_g1_i1	2	#N/A	K04077	groEL, HSPD1	Chaperonin GroEL (HSP60 family)
TRINITY_DN122221_c0_g1_i1	3	#N/A	K03544	clpX, CLPX	ATP-dependent protease Clp, ATPase subunit
TRINITY_DN134792_c0_g1_i1	5	#N/A	K02879	RP-L17, MRPL17, rplQ	Ribosomal protein L17
TRINITY_DN108510_c0_g1_i1	2	#N/A	K09969	aapJ, bztA	ABC-type amino acid transport/signal transduction system, periplasmic component/domain
TRINITY_DN107253_c0_g1_i1	1	#N/A	K02967	RP-S2, MRPS2, rpsB	Ribosomal protein S2
TRINITY_DN126212_c0_g1_i1	3	#N/A	K07736	carD	RNA polymerase-interacting regulator, CarD/CdnL/TRCF family
TRINITY_DN100507_c0_g1_i1	1	#N/A	K04771	degP, htrA	Periplasmic serine protease, S1-C subfamily, contain C-terminal PDZ domain
TRINITY_DN124550_c0_g1_i1	1	#N/A	NA	NA	NA
TRINITY_DN104677_c0_g1_i1	1	#N/A	K02040	pstS	ABC-type phosphate transport system, periplasmic component
TRINITY_DN116452_c0_g1_i1	4	#N/A	K03043	rpoB	DNA-directed RNA polymerase, beta subunit/140 kD subunit
TRINITY_DN139831_c0_g1_i1	5	#N/A	K10439	rbsB	ABC-type sugar transport system, periplasmic component, contains N-terminal xre family HTH domain
TRINITY_DN106389_c0_g1_i1	4	#N/A	NA	NA	Peptide methionine sulfoxide reductase MsrB
TRINITY_DN106387_c0_g1_i1	2	#N/A	K03665	hflX	50S ribosomal subunit-associated GTPase HflX
TRINITY_DN119710_c0_g1_i1	6	#N/A	NA	NA	NADP-dependent 3-hydroxy acid dehydrogenase YdfG
TRINITY_DN121357_c0_g1_i1	1	#N/A	K03043	rpoB	DNA-directed RNA polymerase, beta subunit/140 kD subunit
TRINITY_DN129140_c0_g1_i1	5	#N/A	K00162	PDHB, pdhB	Pyruvate/2-oxoglutarate/acetoin dehydrogenase complex, dehydrogenase (E1) component
TRINITY_DN125259_c0_g1_i1	1	#N/A	K02111	ATPF1A, atpA	FoF1-type ATP synthase, alpha subunit
TRINITY_DN140219_c0_g1_i1	6	#N/A	K03782	katG	Catalase (peroxidase I)
TRINITY_DN140255_c0_g1_i1	3	#N/A	K00382	DLD, lpd, pdhD	Pyruvate/2-oxoglutarate dehydrogenase complex, dihydrolipoamide dehydrogenase (E3) component or related enzyme
TRINITY_DN127056_c0_g1_i1	1	#N/A	K07736	carD	RNA polymerase-interacting regulator, CarD/CdnL/TRCF family
TRINITY_DN108451_c0_g1_i1	2	#N/A	K00554	trmD	tRNA G37 N-methylase TrmD
TRINITY_DN110310_c0_g1_i1	1	#N/A	K03076	secY	Preprotein translocase subunit SecY
TRINITY_DN122017_c0_g1_i1	6	#N/A	K03640	pal	Outer membrane protein OmpA and related peptidoglycan-associated (lipo)proteins
TRINITY_DN120671_c0_g1_i1	1	#N/A	K00605	gcvT, AMT	Glycine cleavage system T protein (aminomethyltransferase)
TRINITY_DN120486_c0_g1_i1	4	#N/A	K02519	infB, MTIF2	NA
TRINITY_DN109656_c0_g1_i1	2	#N/A	K00789	metK	S-adenosylmethionine synthetase
TRINITY_DN110137_c0_g1_i1	2	#N/A	K00411	UQCRFS1, RIP1, petA	Rieske Fe-S protein
TRINITY_DN104043_c0_g1_i1	5	GO:0019605	NA	NA	NA
TRINITY_DN136647_c0_g1_i1	5	#N/A	K03798	ftsH, hflB	ATP-dependent Zn proteases
TRINITY_DN136668_c0_g1_i1	2	#N/A	K02986	RP-S4, rpsD	Ribosomal protein S4 or related protein
TRINITY_DN109058_c0_g1_i1	2	#N/A	K02931	RP-L5, MRPL5, rplE	Ribosomal protein L5
TRINITY_DN109069_c0_g1_i1	6	#N/A	K03046	rpoC	DNA-directed RNA polymerase, beta' subunit/160 kD subunit
TRINITY_DN137141_c0_g1_i1	1	#N/A	K01338	lon	ATP-dependent Lon protease, bacterial type
TRINITY_DN134904_c0_g1_i1	6	#N/A	K01868	TARS, thrS	Threonyl-tRNA synthetase
TRINITY_DN121271_c0_g1_i1	2	#N/A	K02520	infC, MTIF3	Translation initiation factor IF-3
TRINITY_DN118904_c0_g1_i1	2	#N/A	K02871	RP-L13, MRPL13, rplM	Ribosomal protein L13
TRINITY_DN139651_c0_g1_i1	1	#N/A	K03695	clpB	ATP-dependent Clp protease ATP-binding subunit ClpA
TRINITY_DN110636_c0_g1_i1	6	#N/A	K01758	CTH	Cystathionine beta-lyase/cystathionine gamma-synthase
TRINITY_DN119318_c0_g1_i1	5	#N/A	NA	NA	Murein DD-endopeptidase MepM and murein hydrolase activator NlpD, contain LysM domain
TRINITY_DN112714_c0_g1_i1	1	#N/A	K02040	pstS	ABC-type phosphate transport system, periplasmic component
TRINITY_DN133570_c0_g1_i1	1	#N/A	K02261	COX2	Heme/copper-type cytochrome/quinol oxidase, subunit 2
TRINITY_DN125606_c0_g1_i1	5	#N/A	K01338	lon	ATP-dependent Lon protease, bacterial type
TRINITY_DN132758_c0_g1_i1	5	#N/A	K03046	rpoC	NA
TRINITY_DN119459_c0_g1_i1	2	#N/A	K00145	argC	N-acetyl-gamma-glutamylphosphate reductase
TRINITY_DN119459_c0_g1_i2	2	#N/A	K00145	argC	N-acetyl-gamma-glutamylphosphate reductase
TRINITY_DN119410_c0_g1_i1	2	GO:0030244	NA	NA	NA
TRINITY_DN135941_c0_g1_i1	2	#N/A	K02886	RP-L2, MRPL2, rplB	Ribosomal protein L2
TRINITY_DN138285_c0_g1_i1	6	#N/A	K04764	ihfA, himA	Bacterial nucleoid DNA-binding protein
TRINITY_DN137306_c0_g1_i1	5	#N/A	K02313	dnaA	Chromosomal replication initiation ATPase DnaA
TRINITY_DN137350_c0_g1_i1	1	#N/A	K01869	LARS, leuS	Leucyl-tRNA synthetase
TRINITY_DN134136_c0_g1_i1	1	#N/A	K00340	nuoK	NADH:ubiquinone oxidoreductase subunit 11 or 4L (chain K)
TRINITY_DN134147_c0_g1_i1	1	#N/A	K11717	sufS	Selenocysteine lyase/Cysteine desulfurase
TRINITY_DN139354_c0_g1_i1	6	#N/A	K02520	infC, MTIF3	Translation initiation factor IF-3
TRINITY_DN121704_c0_g1_i1	4	#N/A	K00265	gltB	Glutamate synthase domain 2
TRINITY_DN121772_c0_g1_i1	5	#N/A	K01338	lon	ATP-dependent Lon protease, bacterial type
TRINITY_DN121746_c0_g1_i1	2	#N/A	K09117	K09117	Uncharacterized conserved protein YqeY
TRINITY_DN107304_c0_g1_i1	5	#N/A	K02520	infC, MTIF3	NA
TRINITY_DN136412_c0_g1_i1	2	#N/A	K02945	RP-S1, rpsA	Ribosomal protein S1
TRINITY_DN135757_c0_g1_i1	3	#N/A	K23535	nupB	ABC-type uncharacterized transport system, permease component
TRINITY_DN118846_c0_g1_i1	6	#N/A	K04043	dnaK, HSPA9	Molecular chaperone DnaK (HSP70)
TRINITY_DN118845_c0_g1_i1	3	#N/A	K03696	clpC	ATP-dependent Clp protease ATP-binding subunit ClpA
TRINITY_DN105387_c0_g1_i1	1	#N/A	K00411	UQCRFS1, RIP1, petA	Rieske Fe-S protein
TRINITY_DN105376_c0_g1_i1	3	#N/A	K02948	RP-S11, MRPS11, rpsK	Ribosomal protein S11
TRINITY_DN133851_c0_g1_i1	1	#N/A	K04043	dnaK, HSPA9	Molecular chaperone DnaK (HSP70)
TRINITY_DN133854_c0_g1_i1	1	#N/A	K01938	fhs	Formyltetrahydrofolate synthetase
TRINITY_DN136786_c0_g1_i1	3	#N/A	K06204	dksA	RNA polymerase-binding transcription factor DksA
TRINITY_DN125769_c0_g1_i1	4	#N/A	K00600	glyA, SHMT	Glycine/serine hydroxymethyltransferase
TRINITY_DN27437_c0_g1_i10	4	#N/A	NA	NA	Transcriptional regulator, contains XRE-family HTH domain
TRINITY_DN27437_c0_g1_i12	6	#N/A	NA	NA	Transcriptional regulator, contains XRE-family HTH domain
TRINITY_DN27437_c0_g1_i6	6	#N/A	NA	NA	Transcriptional regulator, contains XRE-family HTH domain
TRINITY_DN22228_c0_g1_i1	5	#N/A	K03046	rpoC	DNA-directed RNA polymerase, beta' subunit/160 kD subunit
TRINITY_DN22228_c0_g1_i2	3	#N/A	K03046	rpoC	DNA-directed RNA polymerase, beta' subunit/160 kD subunit
TRINITY_DN62977_c0_g1_i1	6	#N/A	NA	NA	Heme/copper-type cytochrome/quinol oxidase, subunit 1
TRINITY_DN61191_c0_g1_i1	1	#N/A	NA	NA	Cell wall hydrolase CwlJ, involved in spore germination
TRINITY_DN52691_c0_g1_i1	6	#N/A	K05572	ndhA	NADH:ubiquinone oxidoreductase subunit 1 (chain H)
TRINITY_DN52644_c0_g1_i1	5	#N/A	K01251	E3.3.1.1, ahcY	S-adenosylhomocysteine hydrolase
TRINITY_DN42455_c0_g1_i1	6	#N/A	K02274	coxA, ctaD	Heme/copper-type cytochrome/quinol oxidase, subunit 1
TRINITY_DN28340_c0_g1_i1	6	#N/A	K03043	rpoB	DNA-directed RNA polymerase, beta subunit/140 kD subunit
TRINITY_DN91974_c0_g1_i1	2	#N/A	K24158	prx	Alkyl hydroperoxide reductase subunit AhpC (peroxiredoxin)
TRINITY_DN54362_c0_g1_i1	3	#N/A	K02469	gyrA	DNA gyrase/topoisomerase IV, subunit A
TRINITY_DN54362_c0_g2_i1	6	#N/A	K02469	gyrA	DNA gyrase/topoisomerase IV, subunit A
TRINITY_DN4445_c0_g1_i7	4	#N/A	K01881	PARS, proS	Prolyl-tRNA synthetase
TRINITY_DN11995_c0_g1_i1	2	#N/A	K04077	groEL, HSPD1	Chaperonin GroEL (HSP60 family)
TRINITY_DN48701_c0_g1_i1	1	#N/A	K02945	RP-S1, rpsA	Ribosomal protein S1
TRINITY_DN90358_c0_g1_i1	6	#N/A	K01255	CARP, pepA	Leucyl aminopeptidase
TRINITY_DN49254_c0_g2_i1	1	#N/A	K03046	rpoC	DNA-directed RNA polymerase, beta' subunit/160 kD subunit
TRINITY_DN49226_c0_g1_i2	1	#N/A	K02871	RP-L13, MRPL13, rplM	Ribosomal protein L13
TRINITY_DN45637_c0_g1_i2	4	#N/A	K01755	argH, ASL	Argininosuccinate lyase
TRINITY_DN60339_c0_g1_i1	5	#N/A	K02111	ATPF1A, atpA	FoF1-type ATP synthase, alpha subunit
TRINITY_DN60334_c0_g1_i1	1	#N/A	K04043	dnaK, HSPA9	Molecular chaperone DnaK (HSP70)
TRINITY_DN60389_c0_g1_i1	6	#N/A	K03040	rpoA	DNA-directed RNA polymerase, alpha subunit/40 kD subunit
TRINITY_DN59004_c0_g2_i1	6	#N/A	K03046	rpoC	DNA-directed RNA polymerase, beta' subunit/160 kD subunit
TRINITY_DN59086_c0_g1_i1	4	#N/A	K02878	RP-L16, MRPL16, rplP	Ribosomal protein L16/L10AE
TRINITY_DN59086_c0_g2_i1	4	#N/A	K02890	RP-L22, MRPL22, rplV	Ribosomal protein L22
TRINITY_DN59087_c0_g1_i2	5	#N/A	K02945	RP-S1, rpsA	Ribosomal protein S1
TRINITY_DN59013_c0_g1_i1	3	#N/A	K02274	coxA, ctaD	Heme/copper-type cytochrome/quinol oxidase, subunit 1
TRINITY_DN39576_c0_g1_i2	3	#N/A	K02358	tuf, TUFM	Translation elongation factor EF-Tu, a GTPase
TRINITY_DN39507_c0_g1_i1	1	#N/A	K02996	RP-S9, MRPS9, rpsI	Ribosomal protein S9
TRINITY_DN3782_c0_g1_i14	3	GO:0006221	NA	NA	NA
TRINITY_DN3782_c0_g1_i18	6	GO:0019856	NA	NA	NA
TRINITY_DN3782_c0_g1_i4	3	GO:0006221	NA	NA	NA
TRINITY_DN3782_c0_g1_i7	3	GO:0006221	NA	NA	NA
TRINITY_DN69534_c0_g1_i1	6	#N/A	K02954	RP-S14, MRPS14, rpsN	Ribosomal protein S14
TRINITY_DN54730_c0_g1_i1	1	#N/A	K00134	GAPDH, gapA	Glyceraldehyde-3-phosphate dehydrogenase/erythrose-4-phosphate dehydrogenase
TRINITY_DN54752_c0_g1_i1	5	#N/A	K02963	RP-S18, MRPS18, rpsR	Ribosomal protein S18
TRINITY_DN1375_c0_g1_i75	1	#N/A	NA	NA	NA
TRINITY_DN77319_c0_g1_i1	3	GO:0055085	NA	NA	TRAP-type C4-dicarboxylate transport system, periplasmic component
TRINITY_DN26603_c0_g1_i1	3	#N/A	K03798	ftsH, hflB	ATP-dependent Zn proteases
TRINITY_DN54267_c0_g1_i1	6	#N/A	K04077	groEL, HSPD1	Chaperonin GroEL (HSP60 family)
TRINITY_DN54291_c0_g1_i4	5	GO:0006865	K01999	livK	ABC-type branched-chain amino acid transport system, periplasmic component
TRINITY_DN54281_c0_g1_i3	2	#N/A	K04078	groES, HSPE1	Co-chaperonin GroES (HSP10)
TRINITY_DN48116_c0_g3_i1	5	#N/A	K00315	DMGDH	NA
TRINITY_DN66362_c0_g1_i1	3	#N/A	K09014	sufB	Fe-S cluster assembly scaffold protein SufB
TRINITY_DN66310_c0_g1_i1	5	#N/A	K02963	RP-S18, MRPS18, rpsR	Ribosomal protein S18
TRINITY_DN66379_c0_g1_i1	5	#N/A	K01647	CS, gltA	Citrate synthase
TRINITY_DN41155_c0_g1_i1	5	#N/A	K01784	galE, GALE	UDP-glucose 4-epimerase
TRINITY_DN41173_c0_g1_i1	2	#N/A	K02112	ATPF1B, atpD	FoF1-type ATP synthase, beta subunit
TRINITY_DN69791_c0_g1_i1	4	#N/A	K02357	tsf, TSFM	Translation elongation factor EF-Ts
TRINITY_DN41690_c0_g1_i1	4	#N/A	K02358	tuf, TUFM	Translation elongation factor EF-Tu, a GTPase
TRINITY_DN41605_c0_g4_i1	4	#N/A	K02867	RP-L11, MRPL11, rplK	Ribosomal protein L11
TRINITY_DN13688_c0_g1_i4	6	#N/A	K02935	RP-L7, MRPL12, rplL	Ribosomal protein L7/L12
TRINITY_DN13688_c0_g3_i1	6	#N/A	K02935	RP-L7, MRPL12, rplL	Ribosomal protein L7/L12
TRINITY_DN58648_c0_g1_i1	1	#N/A	K02906	RP-L3, MRPL3, rplC	Ribosomal protein L3
TRINITY_DN46082_c0_g1_i2	1	#N/A	K02994	RP-S8, rpsH	Ribosomal protein S8
TRINITY_DN75411_c0_g1_i1	3	#N/A	K02994	RP-S8, rpsH	Ribosomal protein S8
TRINITY_DN75428_c0_g1_i1	6	#N/A	K00962	pnp, PNPT1	Polyribonucleotide nucleotidyltransferase (polynucleotide phosphorylase)
TRINITY_DN60658_c0_g1_i1	2	#N/A	K02355	fusA, GFM, EFG	Translation elongation factor EF-G, a GTPase
TRINITY_DN60684_c0_g1_i1	6	#N/A	K00873	PK, pyk	Pyruvate kinase
TRINITY_DN60677_c0_g1_i1	1	#N/A	K02950	RP-S12, MRPS12, rpsL	Ribosomal protein S12
TRINITY_DN57724_c0_g2_i1	5	#N/A	K02863	RP-L1, MRPL1, rplA	Ribosomal protein L1
TRINITY_DN63084_c0_g1_i1	3	#N/A	K01782	fadJ	Enoyl-CoA hydratase/carnithine racemase
TRINITY_DN36869_c0_g1_i1	5	GO:0006974	NA	NA	Uncharacterized conserved protein, YHS domain
TRINITY_DN36869_c0_g1_i2	1	GO:0006629	NA	NA	Uncharacterized conserved protein, YHS domain
TRINITY_DN36883_c0_g1_i2	4	#N/A	K02939	RP-L9, MRPL9, rplI	Ribosomal protein L9
TRINITY_DN94769_c0_g1_i1	1	#N/A	K00962	pnp, PNPT1	Polyribonucleotide nucleotidyltransferase (polynucleotide phosphorylase)
TRINITY_DN94714_c0_g1_i1	2	#N/A	K15551	tauA	ABC-type taurine transport system, periplasmic component
TRINITY_DN93_c0_g1_i23	6	#N/A	NA	NA	NA
TRINITY_DN57637_c0_g1_i1	2	#N/A	K00259	ald	Alanine dehydrogenase
TRINITY_DN76716_c0_g1_i1	2	#N/A	K03086	rpoD	NA
TRINITY_DN76795_c0_g1_i1	5	#N/A	K00615	E2.2.1.1, tktA, tktB	Transketolase
TRINITY_DN76789_c0_g1_i1	1	#N/A	K03070	secA	Preprotein translocase subunit SecA (ATPase, RNA helicase)
TRINITY_DN25150_c0_g1_i5	4	#N/A	K01142	E3.1.11.2, xthA	Exonuclease III
TRINITY_DN59523_c0_g1_i1	1	#N/A	K03073	secE	Preprotein translocase subunit SecE
TRINITY_DN11196_c0_g1_i5	4	GO:0035194	NA	NA	NA
TRINITY_DN65251_c0_g1_i1	6	#N/A	K01687	ilvD	Dihydroxyacid dehydratase/phosphogluconate dehydratase
TRINITY_DN65214_c0_g1_i1	3	#N/A	K02470	gyrB	DNA gyrase/topoisomerase IV, subunit B
TRINITY_DN76815_c0_g1_i1	6	#N/A	K02888	RP-L21, MRPL21, rplU	Ribosomal protein L21
TRINITY_DN80953_c0_g1_i1	1	GO:0055085	K02002	proX	ABC-type proline/glycine betaine transport system, periplasmic component
TRINITY_DN80938_c0_g1_i1	5	#N/A	K00962	pnp, PNPT1	Polyribonucleotide nucleotidyltransferase (polynucleotide phosphorylase)
TRINITY_DN11059_c0_g1_i1	5	#N/A	K02860	rimM	Ribosomal 30S subunit maturation factor RimM, required for 16S rRNA processing
TRINITY_DN17889_c0_g2_i1	2	#N/A	K02358	tuf, TUFM	Translation elongation factor EF-Tu, a GTPase
TRINITY_DN58164_c0_g1_i1	3	#N/A	K00259	ald	Alanine dehydrogenase
TRINITY_DN68104_c0_g1_i1	6	#N/A	NA	NA	Fe-S cluster assembly iron-binding protein IscA
TRINITY_DN81273_c0_g1_i1	5	#N/A	K03168	topA	DNA topoisomerase IA
TRINITY_DN45346_c0_g2_i1	3	#N/A	K04077	groEL, HSPD1	Chaperonin GroEL (HSP60 family)
TRINITY_DN51000_c0_g1_i1	4	#N/A	K03696	clpC	ATP-dependent Clp protease ATP-binding subunit ClpA
TRINITY_DN61485_c0_g1_i1	6	#N/A	K07305	msrB	Peptide methionine sulfoxide reductase MsrB
TRINITY_DN22119_c0_g1_i11	1	#N/A	K02946	RP-S10, MRPS10, rpsJ	Ribosomal protein S10
TRINITY_DN30735_c1_g1_i1	1	#N/A	K02965	RP-S19, rpsS	Ribosomal protein S19
TRINITY_DN30701_c0_g1_i1	1	#N/A	K04043	dnaK, HSPA9	Molecular chaperone DnaK (HSP70)
TRINITY_DN90014_c0_g1_i1	3	GO:0051205	K07280	K07280	Tetratricopeptide (TPR) repeat
TRINITY_DN15622_c0_g1_i12	4	#N/A	K07341	doc	Prophage maintenance system killer protein
TRINITY_DN15622_c0_g1_i23	5	#N/A	K07341	doc	Prophage maintenance system killer protein
TRINITY_DN15622_c0_g1_i26	4	#N/A	K07341	doc	Prophage maintenance system killer protein
TRINITY_DN15622_c0_g1_i3	1	#N/A	K07341	doc	Prophage maintenance system killer protein
TRINITY_DN15622_c0_g1_i5	3	#N/A	K07341	doc	Prophage maintenance system killer protein
TRINITY_DN10855_c0_g1_i10	3	#N/A	K02945	RP-S1, rpsA	Ribosomal protein S1
TRINITY_DN44062_c0_g2_i1	1	#N/A	K00410	fbcH	Cytochrome b subunit of the bc complex
TRINITY_DN69840_c0_g1_i1	5	#N/A	K00962	pnp, PNPT1	Polyribonucleotide nucleotidyltransferase (polynucleotide phosphorylase)
TRINITY_DN25236_c0_g3_i1	2	#N/A	K02112	ATPF1B, atpD	FoF1-type ATP synthase, beta subunit
TRINITY_DN25279_c0_g1_i2	1	#N/A	K03043	rpoB	DNA-directed RNA polymerase, beta subunit/140 kD subunit
TRINITY_DN97031_c0_g1_i1	6	#N/A	K03046	rpoC	DNA-directed RNA polymerase, beta' subunit/160 kD subunit
TRINITY_DN92172_c0_g1_i1	6	#N/A	K02426	sufE	Sulfur transfer protein SufE, Fe-S center assembly
TRINITY_DN92169_c0_g1_i1	5	#N/A	K01637	E4.1.3.1, aceA	Isocitrate lyase
TRINITY_DN49397_c0_g1_i2	1	#N/A	K03043	rpoB	DNA-directed RNA polymerase, beta subunit/140 kD subunit
TRINITY_DN49362_c0_g1_i1	5	#N/A	K02961	RP-S17, MRPS17, rpsQ	Ribosomal protein S17
TRINITY_DN49362_c0_g2_i1	5	#N/A	K02931	RP-L5, MRPL5, rplE	Ribosomal protein L5
TRINITY_DN54099_c0_g1_i1	5	#N/A	K03320	amt, AMT, MEP	Ammonia channel protein AmtB
TRINITY_DN54082_c0_g1_i1	3	#N/A	K03210	yajC	Preprotein translocase subunit YajC
TRINITY_DN54082_c0_g1_i2	4	#N/A	K03210	yajC	Preprotein translocase subunit YajC
TRINITY_DN45012_c0_g2_i2	1	#N/A	K02926	RP-L4, MRPL4, rplD	Ribosomal protein L4
TRINITY_DN63459_c0_g1_i1	6	#N/A	K02112	ATPF1B, atpD	FoF1-type ATP synthase, beta subunit
TRINITY_DN63454_c0_g1_i1	6	#N/A	K06020	ettA	ATPase components of ABC transporters with duplicated ATPase domains
TRINITY_DN38176_c0_g1_i2	1	#N/A	K02935	RP-L7, MRPL12, rplL	Ribosomal protein L7/L12
TRINITY_DN41372_c0_g1_i1	5	GO:0006865	K01999	livK	ABC-type branched-chain amino acid transport system, periplasmic component
TRINITY_DN41360_c0_g1_i1	3	#N/A	K03628	rho	Transcription termination factor Rho
TRINITY_DN41390_c0_g1_i1	1	#N/A	K02112	ATPF1B, atpD	FoF1-type ATP synthase, beta subunit
TRINITY_DN63382_c0_g1_i1	2	#N/A	K24158	prx	Alkyl hydroperoxide reductase subunit AhpC (peroxiredoxin)
TRINITY_DN3165_c0_g1_i42	4	#N/A	K00281	GLDC, gcvP	Glycine cleavage system protein P (pyridoxal-binding), N-terminal domain
TRINITY_DN3165_c0_g1_i44	4	#N/A	NA	NA	NA
TRINITY_DN19583_c0_g1_i5	3	#N/A	K07335	bmpA, bmpB, tmpC	Basic membrane lipoprotein Med, periplasmic binding protein (PBP1-ABC) superfamily
TRINITY_DN42155_c0_g1_i1	1	#N/A	K02111	ATPF1A, atpA	FoF1-type ATP synthase, alpha subunit
TRINITY_DN42192_c0_g1_i1	1	#N/A	K02899	RP-L27, MRPL27, rpmA	Ribosomal protein L27
TRINITY_DN93850_c0_g1_i1	3	#N/A	K01627	kdsA	3-deoxy-D-manno-octulosonic acid (KDO) 8-phosphate synthase
TRINITY_DN93853_c0_g1_i1	2	#N/A	K08688	E3.5.3.3	Xaa-Pro aminopeptidase
TRINITY_DN28824_c0_g1_i1	5	GO:0061077	NA	NA	Putative Zn-dependent protease, contains TPR repeats
TRINITY_DN28824_c0_g1_i2	3	GO:0051603	NA	NA	Putative Zn-dependent protease, contains TPR repeats
TRINITY_DN43399_c0_g1_i1	6	#N/A	K02982	RP-S3, rpsC	Ribosomal protein S3
TRINITY_DN46732_c0_g1_i2	5	#N/A	K02933	RP-L6, MRPL6, rplF	Ribosomal protein L6P/L9E
TRINITY_DN20621_c0_g1_i3	5	#N/A	K00864	glpK, GK	Glycerol kinase
TRINITY_DN20619_c0_g1_i4	1	#N/A	K02935	RP-L7, MRPL12, rplL	Ribosomal protein L7/L12
TRINITY_DN20641_c0_g3_i2	2	#N/A	K05788	ihfB, himD	Bacterial nucleoid DNA-binding protein
TRINITY_DN79938_c0_g1_i1	3	#N/A	K03046	rpoC	DNA-directed RNA polymerase, beta' subunit/160 kD subunit
TRINITY_DN75066_c0_g1_i1	5	#N/A	NA	NA	Predicted Na+-dependent transporter
TRINITY_DN93427_c0_g1_i1	3	#N/A	K01681	ACO, acnA	Aconitase A
TRINITY_DN93405_c0_g1_i1	2	#N/A	K00945	cmk	Cytidylate kinase
TRINITY_DN47414_c0_g1_i1	5	#N/A	K04077	groEL, HSPD1	Chaperonin GroEL (HSP60 family)
TRINITY_DN75794_c0_g1_i1	2	#N/A	NA	NA	ABC-type glycerol-3-phosphate transport system, periplasmic component
TRINITY_DN75728_c0_g1_i1	1	#N/A	K02115	ATPF1G, atpG	FoF1-type ATP synthase, gamma subunit
TRINITY_DN49514_c0_g1_i1	3	#N/A	K04043	dnaK, HSPA9	Molecular chaperone DnaK (HSP70)
TRINITY_DN49601_c1_g1_i1	3	GO:0039724	NA	NA	NA
TRINITY_DN49532_c0_g2_i11	4	GO:0006508	NA	NA	NA
TRINITY_DN49532_c0_g2_i7	3	GO:0006508	NA	NA	NA
TRINITY_DN49532_c0_g3_i1	5	#N/A	K00053	ilvC	Ketol-acid reductoisomerase
TRINITY_DN77814_c0_g1_i1	3	#N/A	K00919	ispE	4-diphosphocytidyl-2C-methyl-D-erythritol kinase
TRINITY_DN21869_c0_g2_i6	3	#N/A	K10232	aglE, ggtB	ABC-type glycerol-3-phosphate transport system, periplasmic component
TRINITY_DN21887_c0_g1_i1	5	#N/A	K03043	rpoB	DNA-directed RNA polymerase, beta subunit/140 kD subunit
TRINITY_DN21887_c0_g1_i3	5	#N/A	K03043	rpoB	DNA-directed RNA polymerase, beta subunit/140 kD subunit
TRINITY_DN78274_c0_g1_i1	6	#N/A	K00164	OGDH, sucA	2-oxoglutarate dehydrogenase complex, dehydrogenase (E1) component, and related enzymes
TRINITY_DN14906_c1_g1_i4	1	#N/A	K03881	ND4	NADH:ubiquinone oxidoreductase subunit 4 (chain M)
TRINITY_DN14906_c1_g1_i7	5	#N/A	NA	NA	NADH:ubiquinone oxidoreductase subunit 4 (chain M)
TRINITY_DN14906_c1_g3_i2	1	#N/A	K00337	nuoH	NADH:ubiquinone oxidoreductase subunit 1 (chain H)
TRINITY_DN4526_c0_g1_i3	1	#N/A	NA	NA	NA
TRINITY_DN4526_c1_g1_i6	4	#N/A	NA	NA	Retron-type reverse transcriptase
TRINITY_DN9535_c0_g1_i11	3	GO:0019605	NA	NA	NA
TRINITY_DN9571_c0_g1_i6	6	#N/A	NA	NA	Methylmalonyl-CoA mutase, N-terminal domain/subunit
TRINITY_DN9571_c0_g1_i8	6	#N/A	NA	NA	Methylmalonyl-CoA mutase, N-terminal domain/subunit
TRINITY_DN9533_c0_g1_i17	4	#N/A	NA	NA	Ankyrin repeat
TRINITY_DN9533_c0_g1_i8	5	#N/A	NA	NA	Ankyrin repeat
TRINITY_DN41222_c0_g1_i1	1	#N/A	K03117	tatB	Sec-independent protein translocase protein TatA
TRINITY_DN5036_c0_g1_i18	5	#N/A	K12255	gbuA	Arginase family enzyme
TRINITY_DN5036_c0_g1_i23	1	#N/A	K12255	gbuA	Arginase family enzyme
TRINITY_DN5060_c0_g1_i13	1	#N/A	K05521	draG	ADP-ribosylglycohydrolase
TRINITY_DN43902_c0_g1_i1	3	#N/A	NA	NA	Acyl-CoA dehydrogenase related to the alkylation response protein AidB
TRINITY_DN95742_c0_g1_i1	6	#N/A	K03217	yidC, spoIIIJ, OXA1, ccfA	NA
TRINITY_DN2858_c0_g1_i5	6	#N/A	K03234	EEF2	Translation elongation factor EF-G, a GTPase
TRINITY_DN81095_c0_g1_i1	2	#N/A	K00499	CMO	Phenylpropionate dioxygenase or related ring-hydroxylating dioxygenase, large terminal subunit
TRINITY_DN69031_c0_g1_i1	2	#N/A	K00615	E2.2.1.1, tktA, tktB	Transketolase
TRINITY_DN42353_c0_g4_i1	5	#N/A	K02965	RP-S19, rpsS	Ribosomal protein S19
TRINITY_DN13990_c0_g1_i1	1	#N/A	K02358	tuf, TUFM	Translation elongation factor EF-Tu, a GTPase
TRINITY_DN41064_c0_g1_i1	5	#N/A	K02890	RP-L22, MRPL22, rplV	Ribosomal protein L22
TRINITY_DN62769_c0_g1_i1	2	#N/A	NA	NA	Xanthine/uracil permease
TRINITY_DN7727_c0_g1_i1	5	#N/A	NA	NA	NA
TRINITY_DN7727_c0_g1_i13	6	#N/A	NA	NA	Ankyrin repeat
TRINITY_DN7727_c0_g1_i82	6	#N/A	NA	NA	NA
TRINITY_DN38244_c0_g1_i1	2	#N/A	K04077	groEL, HSPD1	Chaperonin GroEL (HSP60 family)
TRINITY_DN35611_c0_g2_i1	3	#N/A	K00962	pnp, PNPT1	Polyribonucleotide nucleotidyltransferase (polynucleotide phosphorylase)
TRINITY_DN25453_c1_g1_i1	6	#N/A	K03883	ND5	NADH:ubiquinone oxidoreductase subunit 5 (chain L)/Multisubunit Na+/H+ antiporter, MnhA subunit
TRINITY_DN78064_c0_g1_i1	4	#N/A	K02860	rimM	Ribosomal 30S subunit maturation factor RimM, required for 16S rRNA processing
TRINITY_DN50389_c0_g1_i1	5	#N/A	K01938	fhs	Formyltetrahydrofolate synthetase
TRINITY_DN62331_c0_g1_i1	4	#N/A	K03076	secY	Preprotein translocase subunit SecY
TRINITY_DN58348_c0_g1_i1	1	#N/A	K03040	rpoA	DNA-directed RNA polymerase, alpha subunit/40 kD subunit
TRINITY_DN90495_c0_g1_i1	4	#N/A	K02835	prfA, MTRF1, MRF1	Protein chain release factor A
TRINITY_DN67889_c0_g1_i1	3	GO:0006071	NA	NA	Rhodanese-related sulfurtransferase
TRINITY_DN53034_c0_g1_i2	2	#N/A	K03530	hupB	Bacterial nucleoid DNA-binding protein
TRINITY_DN17020_c3_g1_i1	1	#N/A	K00343	nuoN	NADH:ubiquinone oxidoreductase subunit 2 (chain N)
TRINITY_DN17020_c3_g1_i2	1	#N/A	NA	NA	NADH:ubiquinone oxidoreductase subunit 2 (chain N)
TRINITY_DN94829_c0_g1_i1	5	#N/A	K03628	rho	Transcription termination factor Rho
TRINITY_DN13561_c0_g3_i1	1	#N/A	K02963	RP-S18, MRPS18, rpsR	Ribosomal protein S18
TRINITY_DN75321_c0_g1_i1	6	#N/A	K00962	pnp, PNPT1	Polyribonucleotide nucleotidyltransferase (polynucleotide phosphorylase)
TRINITY_DN35152_c0_g1_i5	1	GO:0006414	NA	NA	Esterase/lipase superfamily enzyme
TRINITY_DN50471_c0_g1_i1	2	#N/A	K02600	nusA	Transcription antitermination factor NusA, contains S1 and KH domains
TRINITY_DN10348_c0_g1_i1	4	#N/A	K02358	tuf, TUFM	Translation elongation factor EF-Tu, a GTPase
TRINITY_DN10348_c0_g2_i4	1	#N/A	K02358	tuf, TUFM	Translation elongation factor EF-Tu, a GTPase
TRINITY_DN10348_c0_g2_i7	1	#N/A	K02358	tuf, TUFM	Translation elongation factor EF-Tu, a GTPase
TRINITY_DN38621_c0_g1_i1	6	#N/A	K02992	RP-S7, MRPS7, rpsG	Ribosomal protein S7
TRINITY_DN19938_c0_g1_i1	5	#N/A	K02935	RP-L7, MRPL12, rplL	Ribosomal protein L7/L12
TRINITY_DN19939_c1_g1_i1	2	#N/A	K04043	dnaK, HSPA9	Molecular chaperone DnaK (HSP70)
TRINITY_DN89775_c0_g1_i1	4	#N/A	K04077	groEL, HSPD1	Chaperonin GroEL (HSP60 family)
TRINITY_DN89709_c0_g1_i1	2	#N/A	K02112	ATPF1B, atpD	FoF1-type ATP synthase, beta subunit
TRINITY_DN89787_c0_g1_i1	2	#N/A	K09748	rimP	Ribosome maturation factor RimP
TRINITY_DN84773_c0_g1_i1	1	#N/A	K02926	RP-L4, MRPL4, rplD	Ribosomal protein L4
TRINITY_DN28682_c0_g2_i1	1	#N/A	K02895	RP-L24, MRPL24, rplX	Ribosomal protein L24
TRINITY_DN2350_c0_g3_i1	1	#N/A	K02640	petG	NA
TRINITY_DN2350_c3_g1_i1	1	#N/A	K02967	RP-S2, MRPS2, rpsB	Ribosomal protein S2
TRINITY_DN90728_c0_g1_i1	6	#N/A	K05579	ndhH	NADH:ubiquinone oxidoreductase 49 kD subunit (chain D)
TRINITY_DN60959_c0_g1_i1	3	#N/A	K11710	troB, mntB, znuC	ABC-type Mn2+/Zn2+ transport system, ATPase component
TRINITY_DN60984_c0_g1_i1	1	#N/A	K03628	rho	Transcription termination factor Rho
TRINITY_DN53611_c0_g1_i1	1	#N/A	K03043	rpoB	DNA-directed RNA polymerase, beta subunit/140 kD subunit
TRINITY_DN53632_c2_g1_i1	5	GO:0006457	K03770	ppiD	NA
TRINITY_DN53702_c0_g2_i1	1	#N/A	K02113	ATPF1D, atpH	FoF1-type ATP synthase, delta subunit
TRINITY_DN80469_c0_g1_i1	5	#N/A	K00681	ggt	Gamma-glutamyltranspeptidase
TRINITY_DN10644_c0_g1_i1	3	#N/A	K02358	tuf, TUFM	Translation elongation factor EF-Tu, a GTPase
TRINITY_DN10644_c0_g1_i4	5	#N/A	K02358	tuf, TUFM	Translation elongation factor EF-Tu, a GTPase
TRINITY_DN10644_c1_g1_i1	4	#N/A	K02358	tuf, TUFM	Translation elongation factor EF-Tu, a GTPase
TRINITY_DN10644_c2_g2_i1	4	#N/A	K02906	RP-L3, MRPL3, rplC	Ribosomal protein L3
TRINITY_DN10644_c2_g3_i1	4	#N/A	K02926	RP-L4, MRPL4, rplD	Ribosomal protein L4
TRINITY_DN10640_c0_g1_i2	4	#N/A	K04077	groEL, HSPD1	Chaperonin GroEL (HSP60 family)
TRINITY_DN10640_c0_g3_i5	1	#N/A	K04077	groEL, HSPD1	Chaperonin GroEL (HSP60 family)
TRINITY_DN35217_c0_g1_i1	2	#N/A	K04078	groES, HSPE1	Co-chaperonin GroES (HSP10)
TRINITY_DN35217_c0_g1_i3	2	#N/A	K04078	groES, HSPE1	Co-chaperonin GroES (HSP10)
TRINITY_DN35205_c0_g1_i1	2	#N/A	NA	NA	TRAP-type mannitol/chloroaromatic compound transport system, periplasmic component
TRINITY_DN39236_c0_g1_i2	1	GO:0043163	NA	NA	Invasion protein IalB, involved in pathogenesis
TRINITY_DN39236_c0_g1_i3	3	GO:0043163	NA	NA	Invasion protein IalB, involved in pathogenesis
TRINITY_DN45438_c0_g1_i1	3	GO:0090326	NA	NA	NA
TRINITY_DN62299_c0_g1_i1	1	#N/A	K07795	tctC	Tripartite-type tricarboxylate transporter, receptor component TctC
TRINITY_DN51040_c0_g1_i2	6	#N/A	K02906	RP-L3, MRPL3, rplC	Ribosomal protein L3
TRINITY_DN51040_c0_g1_i3	6	#N/A	K02906	RP-L3, MRPL3, rplC	Ribosomal protein L3
TRINITY_DN10101_c0_g1_i1	4	#N/A	K02884	RP-L19, MRPL19, rplS	Ribosomal protein L19
TRINITY_DN10101_c0_g1_i2	1	#N/A	K02884	RP-L19, MRPL19, rplS	Ribosomal protein L19
TRINITY_DN37436_c0_g1_i1	6	#N/A	NA	NA	NA
TRINITY_DN34709_c0_g1_i1	1	#N/A	K02355	fusA, GFM, EFG	Translation elongation factor EF-G, a GTPase
TRINITY_DN34709_c0_g2_i4	1	#N/A	K02992	RP-S7, MRPS7, rpsG	Ribosomal protein S7
TRINITY_DN34709_c0_g4_i1	1	#N/A	K02950	RP-S12, MRPS12, rpsL	Ribosomal protein S12
TRINITY_DN62882_c0_g1_i1	4	#N/A	K02897	RP-L25, rplY	NA
TRINITY_DN50724_c0_g1_i1	2	#N/A	K03043	rpoB	DNA-directed RNA polymerase, beta subunit/140 kD subunit
TRINITY_DN53918_c0_g1_i1	1	#N/A	K01876	DARS2, aspS	Aspartyl-tRNA synthetase
TRINITY_DN34383_c0_g1_i3	3	#N/A	K02863	RP-L1, MRPL1, rplA	Ribosomal protein L1
TRINITY_DN34383_c0_g3_i2	1	#N/A	K02864	RP-L10, MRPL10, rplJ	Ribosomal protein L10
TRINITY_DN34383_c0_g4_i2	5	#N/A	K03043	rpoB	DNA-directed RNA polymerase, beta subunit/140 kD subunit
TRINITY_DN34365_c0_g1_i3	1	#N/A	NA	NA	NADH:ubiquinone oxidoreductase 27 kD subunit (chain C)
TRINITY_DN75558_c0_g1_i1	2	#N/A	K03553	recA	RecA/RadA recombinase
TRINITY_DN79038_c0_g1_i1	1	#N/A	NA	NA	2-hydroxychromene-2-carboxylate isomerase
TRINITY_DN79089_c0_g1_i2	1	#N/A	NA	NA	NA
TRINITY_DN41507_c0_g4_i1	3	#N/A	K04043	dnaK, HSPA9	Molecular chaperone DnaK (HSP70)
TRINITY_DN46172_c0_g2_i1	2	#N/A	NA	NA	Glycine cleavage system T protein (aminomethyltransferase)
TRINITY_DN46133_c0_g1_i1	4	#N/A	K01958	PC, pyc	Pyruvate carboxylase
TRINITY_DN29320_c0_g1_i1	5	#N/A	K01358	clpP, CLPP	ATP-dependent protease ClpP, protease subunit
TRINITY_DN22480_c1_g2_i3	4	#N/A	K02108	ATPF0A, atpB	FoF1-type ATP synthase, membrane subunit a
TRINITY_DN68512_c0_g1_i1	5	#N/A	K00164	OGDH, sucA	2-oxoglutarate dehydrogenase complex, dehydrogenase (E1) component, and related enzymes
TRINITY_DN1453_c1_g1_i5	1	#N/A	K00605	gcvT, AMT	Glycine cleavage system T protein (aminomethyltransferase)
TRINITY_DN1445_c3_g1_i10	4	#N/A	K01609	trpC	Indole-3-glycerol phosphate synthase
TRINITY_DN1450_c0_g1_i12	3	#N/A	NA	NA	NA
TRINITY_DN65016_c0_g1_i1	1	#N/A	K04077	groEL, HSPD1	Chaperonin GroEL (HSP60 family)
TRINITY_DN91293_c0_g1_i1	1	#N/A	K03523	bioY	Biotin transporter BioY
TRINITY_DN91264_c0_g1_i1	6	#N/A	K03076	secY	Preprotein translocase subunit SecY
TRINITY_DN15317_c0_g1_i1	2	#N/A	K01999	livK	ABC-type branched-chain amino acid transport system, periplasmic component
TRINITY_DN15317_c0_g1_i4	2	#N/A	K01999	livK	ABC-type branched-chain amino acid transport system, periplasmic component
TRINITY_DN57578_c0_g1_i1	6	#N/A	K07305	msrB	Peptide methionine sulfoxide reductase MsrB
TRINITY_DN15885_c0_g1_i1	6	#N/A	K02035	ABC.PE.S	ABC-type transport system, periplasmic component
TRINITY_DN15885_c0_g1_i3	4	#N/A	K02035	ABC.PE.S	ABC-type transport system, periplasmic component
TRINITY_DN15885_c0_g1_i6	5	#N/A	K02035	ABC.PE.S	ABC-type transport system, periplasmic component
TRINITY_DN63891_c0_g1_i1	6	#N/A	K03523	bioY	Biotin transporter BioY
TRINITY_DN63891_c0_g1_i2	6	#N/A	K03523	bioY	Biotin transporter BioY
TRINITY_DN94353_c0_g1_i1	6	#N/A	K01963	accD	Acetyl-CoA carboxylase beta subunit
TRINITY_DN55664_c0_g1_i1	4	#N/A	K00138	aldB	Acyl-CoA reductase or other NAD-dependent aldehyde dehydrogenase
TRINITY_DN42047_c0_g2_i1	1	#N/A	K04077	groEL, HSPD1	Chaperonin GroEL (HSP60 family)
TRINITY_DN37189_c0_g1_i3	6	#N/A	K02946	RP-S10, MRPS10, rpsJ	Ribosomal protein S10
TRINITY_DN37196_c0_g1_i1	4	#N/A	NA	NA	NA
TRINITY_DN4090_c0_g1_i1	1	#N/A	K03696	clpC	ATP-dependent Clp protease ATP-binding subunit ClpA
TRINITY_DN4090_c0_g2_i2	1	#N/A	K03696	clpC	ATP-dependent Clp protease ATP-binding subunit ClpA
TRINITY_DN36576_c0_g1_i1	5	#N/A	K00315	DMGDH	Glycine cleavage system T protein (aminomethyltransferase)
TRINITY_DN36576_c0_g1_i2	4	#N/A	K00315	DMGDH	Glycine cleavage system T protein (aminomethyltransferase)
TRINITY_DN4130_c0_g1_i18	3	GO:0006811	K08720	ompU	Outer membrane protein (porin)
TRINITY_DN4130_c0_g1_i22	1	#N/A	K08720	ompU	Outer membrane protein (porin)
TRINITY_DN4130_c0_g1_i26	1	#N/A	K08720	ompU	NA
TRINITY_DN4130_c0_g1_i3	1	GO:0006811	K08720	ompU	Outer membrane protein (porin)
TRINITY_DN4130_c0_g1_i4	3	#N/A	K08720	ompU	Outer membrane protein (porin)
TRINITY_DN38995_c0_g1_i1	1	GO:0017038	NA	NA	NA
TRINITY_DN38969_c0_g1_i2	5	#N/A	K02358	tuf, TUFM	Translation elongation factor EF-Tu, a GTPase
TRINITY_DN38969_c1_g1_i1	2	#N/A	K02358	tuf, TUFM	Translation elongation factor EF-Tu, a GTPase
TRINITY_DN69257_c0_g1_i1	1	#N/A	K03046	rpoC	DNA-directed RNA polymerase, beta' subunit/160 kD subunit
TRINITY_DN19616_c0_g1_i5	1	#N/A	K02114	ATPF1E, atpC	FoF1-type ATP synthase, epsilon subunit
TRINITY_DN62460_c0_g1_i1	1	#N/A	K01338	lon	ATP-dependent Lon protease, bacterial type
TRINITY_DN62419_c0_g1_i1	1	#N/A	K00342	nuoM	NADH:ubiquinone oxidoreductase subunit 4 (chain M)
TRINITY_DN45113_c0_g2_i1	6	#N/A	K09458	fabF, OXSM, CEM1	3-oxoacyl-(acyl-carrier-protein) synthase
TRINITY_DN95664_c0_g1_i1	3	#N/A	K01681	ACO, acnA	Aconitase A
TRINITY_DN95616_c0_g1_i1	6	#N/A	K00259	ald	Alanine dehydrogenase
TRINITY_DN3007_c0_g1_i10	1	#N/A	NA	NA	Chromosome segregation ATPase
TRINITY_DN3007_c0_g1_i12	3	#N/A	NA	NA	Chromosome segregation ATPase
TRINITY_DN3007_c0_g1_i18	6	#N/A	NA	NA	Chromosome segregation ATPase
TRINITY_DN50685_c0_g1_i1	5	#N/A	K08301	rng, cafA	Ribonuclease G or E
TRINITY_DN32603_c0_g2_i1	1	#N/A	K02358	tuf, TUFM	Translation elongation factor EF-Tu, a GTPase
TRINITY_DN35426_c0_g1_i1	3	#N/A	K04077	groEL, HSPD1	Chaperonin GroEL (HSP60 family)
TRINITY_DN35439_c0_g1_i1	4	#N/A	K02946	RP-S10, MRPS10, rpsJ	Ribosomal protein S10
TRINITY_DN1611_c0_g1_i13	4	#N/A	K03637	moaC, CNX3	Molybdenum cofactor biosynthesis enzyme
TRINITY_DN1611_c0_g1_i22	4	#N/A	K03637	moaC, CNX3	Molybdenum cofactor biosynthesis enzyme
TRINITY_DN1611_c0_g1_i34	6	#N/A	K03637	moaC, CNX3	Molybdenum cofactor biosynthesis enzyme
TRINITY_DN76589_c0_g1_i1	1	#N/A	K00948	PRPS, prsA	Phosphoribosylpyrophosphate synthetase
TRINITY_DN91080_c0_g1_i1	2	#N/A	K03851	tpa	Adenosylmethionine-8-amino-7-oxononanoate aminotransferase
TRINITY_DN16898_c2_g1_i5	3	#N/A	NA	NA	Purine nucleoside phosphorylase
TRINITY_DN61873_c0_g1_i1	4	#N/A	K00059	fabG, OAR1	NAD(P)-dependent dehydrogenase, short-chain alcohol dehydrogenase family
TRINITY_DN22357_c0_g1_i1	1	#N/A	K01251	E3.3.1.1, ahcY	S-adenosylhomocysteine hydrolase
TRINITY_DN56193_c0_g1_i1	3	#N/A	K02355	fusA, GFM, EFG	Translation elongation factor EF-G, a GTPase
TRINITY_DN22806_c0_g1_i2	1	#N/A	NA	NA	NADH:ubiquinone oxidoreductase subunit 4 (chain M)
TRINITY_DN22806_c0_g1_i3	1	#N/A	NA	NA	NADH:ubiquinone oxidoreductase subunit 4 (chain M)
TRINITY_DN25610_c0_g2_i1	2	#N/A	K02886	RP-L2, MRPL2, rplB	Ribosomal protein L2
TRINITY_DN21530_c0_g1_i19	4	GO:0015031	NA	NA	NA
TRINITY_DN21530_c0_g1_i8	1	GO:0015031	NA	NA	NA
TRINITY_DN85928_c0_g1_i1	6	#N/A	K01803	TPI, tpiA	Triosephosphate isomerase
TRINITY_DN64273_c0_g1_i1	1	#N/A	K02967	RP-S2, MRPS2, rpsB	Ribosomal protein S2
TRINITY_DN95291_c0_g1_i1	1	#N/A	K19745	acuI	NADPH:quinone reductase or related Zn-dependent oxidoreductase
TRINITY_DN52078_c0_g1_i1	1	#N/A	K02874	RP-L14, MRPL14, rplN	Ribosomal protein L14
TRINITY_DN56964_c0_g1_i1	1	#N/A	K04566	lysK	Lysyl-tRNA synthetase, class I
TRINITY_DN95519_c0_g1_i1	1	#N/A	K03076	secY	Preprotein translocase subunit SecY
TRINITY_DN23130_c0_g1_i10	4	#N/A	K10553	frcC	NA
TRINITY_DN23130_c0_g1_i5	1	#N/A	K10553	frcC	NA
TRINITY_DN95112_c0_g1_i1	1	#N/A	K02945	RP-S1, rpsA	Ribosomal protein S1
TRINITY_DN40301_c0_g1_i1	3	#N/A	K03046	rpoC	NA
TRINITY_DN55260_c0_g1_i1	6	#N/A	K03043	rpoB	DNA-directed RNA polymerase, beta subunit/140 kD subunit
TRINITY_DN77090_c0_g1_i1	1	#N/A	K02874	RP-L14, MRPL14, rplN	Ribosomal protein L14
TRINITY_DN82431_c0_g1_i1	6	#N/A	K00265	gltB	NA
TRINITY_DN61097_c0_g1_i1	3	#N/A	K02988	RP-S5, MRPS5, rpsE	Ribosomal protein S5
TRINITY_DN61083_c0_g1_i1	6	#N/A	K03043	rpoB	DNA-directed RNA polymerase, beta subunit/140 kD subunit
TRINITY_DN18098_c0_g1_i9	4	#N/A	K02931	RP-L5, MRPL5, rplE	Ribosomal protein L5
TRINITY_DN18098_c1_g2_i4	2	#N/A	K03076	secY	Preprotein translocase subunit SecY
TRINITY_DN81199_c0_g1_i1	2	#N/A	K08300	rne	Ribonuclease G or E
TRINITY_DN8822_c0_g1_i12	4	#N/A	K02002	proX	ABC-type proline/glycine betaine transport system, periplasmic component
TRINITY_DN8822_c0_g1_i21	4	GO:0055085	K02002	proX	ABC-type proline/glycine betaine transport system, periplasmic component
TRINITY_DN53150_c0_g1_i1	4	#N/A	K00658	DLST, sucB	Pyruvate/2-oxoglutarate dehydrogenase complex, dihydrolipoamide acyltransferase (E2) component
TRINITY_DN55908_c0_g1_i1	5	#N/A	K02567	napA	Anaerobic selenocysteine-containing dehydrogenase
TRINITY_DN33923_c0_g1_i1	3	#N/A	K10232	aglE, ggtB	NA
TRINITY_DN79779_c0_g1_i1	5	GO:0046740	NA	NA	Predicted phage phi-C31 gp36 major capsid-like protein
TRINITY_DN18391_c0_g1_i1	3	#N/A	K02867	RP-L11, MRPL11, rplK	Ribosomal protein L11
TRINITY_DN94228_c0_g1_i1	5	#N/A	K03076	secY	Preprotein translocase subunit SecY
TRINITY_DN48324_c0_g1_i1	2	#N/A	K04077	groEL, HSPD1	Chaperonin GroEL (HSP60 family)
TRINITY_DN25340_c0_g2_i1	3	#N/A	K03530	hupB	Bacterial nucleoid DNA-binding protein
TRINITY_DN29097_c0_g1_i3	1	GO:0006865	K02002	proX	ABC-type proline/glycine betaine transport system, periplasmic component
TRINITY_DN29097_c0_g1_i5	4	GO:0031460	K02002	proX	ABC-type proline/glycine betaine transport system, periplasmic component
TRINITY_DN53865_c0_g1_i1	5	#N/A	K01938	fhs	Formyltetrahydrofolate synthetase
TRINITY_DN356_c0_g1_i12	4	#N/A	K18335	K18335	NAD(P)-dependent dehydrogenase, short-chain alcohol dehydrogenase family
TRINITY_DN307_c1_g1_i1	1	#N/A	K21053	ade	Adenosine deaminase
TRINITY_DN307_c1_g1_i19	4	#N/A	K21053	ade	Adenosine deaminase
TRINITY_DN307_c1_g1_i2	4	#N/A	K21053	ade	Adenosine deaminase
TRINITY_DN307_c1_g1_i25	3	#N/A	K21053	ade	Adenosine deaminase
TRINITY_DN307_c1_g1_i6	6	#N/A	K21053	ade	Adenosine deaminase
TRINITY_DN52830_c0_g1_i1	2	#N/A	K02000	proV	ABC-type proline/glycine betaine transport system, ATPase component
TRINITY_DN52314_c0_g1_i1	1	#N/A	K02965	RP-S19, rpsS	Ribosomal protein S19
TRINITY_DN92874_c0_g1_i1	6	#N/A	K00382	DLD, lpd, pdhD	Pyruvate/2-oxoglutarate dehydrogenase complex, dihydrolipoamide dehydrogenase (E3) component or related enzyme
TRINITY_DN89905_c0_g1_i1	2	#N/A	K03043	rpoB	DNA-directed RNA polymerase, beta subunit/140 kD subunit
TRINITY_DN31861_c1_g1_i2	1	#N/A	NA	NA	NADH:ubiquinone oxidoreductase 49 kD subunit (chain D)
TRINITY_DN31861_c1_g2_i1	1	#N/A	K03935	NDUFS2	NADH:ubiquinone oxidoreductase 49 kD subunit (chain D)
TRINITY_DN91348_c0_g1_i1	6	#N/A	K03366	butA, budC	NAD(P)-dependent dehydrogenase, short-chain alcohol dehydrogenase family
TRINITY_DN41977_c0_g2_i1	1	#N/A	K02355	fusA, GFM, EFG	Translation elongation factor EF-G, a GTPase
TRINITY_DN61744_c0_g1_i1	4	#N/A	K10255	FAD6, desA	Fatty acid desaturase
TRINITY_DN34995_c0_g1_i1	6	#N/A	NA	NA	Crotonobetainyl-CoA:carnitine CoA-transferase CaiB and related acyl-CoA transferases
TRINITY_DN59192_c0_g2_i1	5	#N/A	K03852	xsc	Acetolactate synthase large subunit or other thiamine pyrophosphate-requiring enzyme
TRINITY_DN40766_c0_g1_i1	4	GO:0015628	NA	NA	NA
TRINITY_DN40729_c0_g1_i1	1	#N/A	K03043	rpoB	DNA-directed RNA polymerase, beta subunit/140 kD subunit
TRINITY_DN77580_c0_g1_i1	6	#N/A	K02895	RP-L24, MRPL24, rplX	Ribosomal protein L24
TRINITY_DN27196_c0_g1_i1	3	#N/A	NA	NA	TRAP-type C4-dicarboxylate transport system, periplasmic component
TRINITY_DN27196_c0_g1_i2	6	#N/A	NA	NA	TRAP-type C4-dicarboxylate transport system, small permease component
TRINITY_DN27196_c0_g1_i3	3	#N/A	NA	NA	TRAP-type C4-dicarboxylate transport system, small permease component
TRINITY_DN27196_c0_g1_i6	1	#N/A	NA	NA	TRAP-type C4-dicarboxylate transport system, small permease component
TRINITY_DN27153_c0_g1_i1	5	#N/A	K15977	K15977	Uncharacterized membrane protein YphA, DoxX/SURF4 family
TRINITY_DN51777_c0_g2_i1	6	#N/A	K03696	clpC	ATP-dependent Clp protease ATP-binding subunit ClpA
TRINITY_DN99855_c0_g1_i1	4	#N/A	K03628	rho	Transcription termination factor Rho
TRINITY_DN71772_c0_g1_i1	1	GO:0008643	K10227	smoE, mtlE	ABC-type glycerol-3-phosphate transport system, periplasmic component
TRINITY_DN32137_c0_g2_i4	1	GO:0051701	NA	NA	NA
TRINITY_DN43522_c0_g1_i1	5	#N/A	K01251	E3.3.1.1, ahcY	S-adenosylhomocysteine hydrolase
TRINITY_DN43522_c0_g1_i2	6	#N/A	K01251	E3.3.1.1, ahcY	S-adenosylhomocysteine hydrolase
TRINITY_DN66653_c0_g1_i1	1	#N/A	NA	NA	Heme/copper-type cytochrome/quinol oxidase, subunit 1
TRINITY_DN26128_c0_g1_i2	1	#N/A	K02112	ATPF1B, atpD	FoF1-type ATP synthase, beta subunit
TRINITY_DN26176_c1_g1_i1	1	#N/A	K02112	ATPF1B, atpD	FoF1-type ATP synthase, beta subunit
TRINITY_DN83441_c0_g1_i1	2	#N/A	K00764	purF, PPAT	Glutamine phosphoribosylpyrophosphate amidotransferase
TRINITY_DN15516_c0_g3_i3	1	#N/A	K02132	ATPeF1A, ATP5A1, ATP1	FoF1-type ATP synthase, alpha subunit
TRINITY_DN90636_c0_g1_i1	6	#N/A	K01937	pyrG, CTPS	CTP synthase (UTP-ammonia lyase)
TRINITY_DN90658_c0_g1_i1	2	#N/A	K00108	betA, CHDH	Choline dehydrogenase or related flavoprotein
TRINITY_DN49805_c0_g1_i1	3	#N/A	NA	NA	3-hydroxymyristoyl/3-hydroxydecanoyl-(acyl carrier protein) dehydratase
TRINITY_DN44183_c0_g2_i1	1	#N/A	K02871	RP-L13, MRPL13, rplM	Ribosomal protein L13
TRINITY_DN44123_c0_g1_i1	6	#N/A	K00789	metK	S-adenosylmethionine synthetase
TRINITY_DN12535_c0_g1_i2	6	#N/A	NA	NA	NA
TRINITY_DN12535_c0_g1_i4	4	#N/A	NA	NA	NA
TRINITY_DN39426_c0_g1_i1	4	#N/A	K00138	aldB	Acyl-CoA reductase or other NAD-dependent aldehyde dehydrogenase
TRINITY_DN49914_c0_g1_i2	3	#N/A	K02355	fusA, GFM, EFG	Translation elongation factor EF-G, a GTPase
TRINITY_DN25962_c1_g1_i9	4	#N/A	K03283	HSPA1s	Molecular chaperone DnaK (HSP70)
TRINITY_DN27244_c0_g1_i1	2	#N/A	K02888	RP-L21, MRPL21, rplU	Ribosomal protein L21
TRINITY_DN27244_c0_g1_i2	1	#N/A	K02888	RP-L21, MRPL21, rplU	Ribosomal protein L21
TRINITY_DN27244_c0_g1_i3	5	#N/A	K02888	RP-L21, MRPL21, rplU	Ribosomal protein L21
TRINITY_DN90866_c0_g1_i1	2	#N/A	K21053	ade	Adenosine deaminase
TRINITY_DN2002_c0_g1_i34	1	#N/A	NA	NA	Ribosomal protein S1
TRINITY_DN2011_c0_g1_i7	5	#N/A	K07305	msrB	Peptide methionine sulfoxide reductase MsrB
TRINITY_DN21957_c0_g1_i1	1	#N/A	K02890	RP-L22, MRPL22, rplV	Ribosomal protein L22
TRINITY_DN81437_c0_g1_i1	2	#N/A	K02358	tuf, TUFM	Translation elongation factor EF-Tu, a GTPase
TRINITY_DN33659_c0_g1_i2	4	#N/A	K01687	ilvD	Dihydroxyacid dehydratase/phosphogluconate dehydratase
TRINITY_DN79889_c0_g1_i1	1	#N/A	K01962	accA	Acetyl-CoA carboxylase alpha subunit
TRINITY_DN12907_c1_g1_i2	1	#N/A	K02358	tuf, TUFM	Translation elongation factor EF-Tu, a GTPase
TRINITY_DN12907_c1_g1_i4	1	#N/A	K02358	tuf, TUFM	Translation elongation factor EF-Tu, a GTPase
TRINITY_DN31598_c0_g1_i1	3	#N/A	K03562	tolQ	Biopolymer transport protein ExbB/TolQ
TRINITY_DN48783_c0_g2_i1	3	#N/A	K00873	PK, pyk	Pyruvate kinase
TRINITY_DN93200_c0_g1_i1	1	#N/A	K01356	lexA	SOS-response transcriptional repressor LexA (RecA-mediated autopeptidase)
TRINITY_DN6191_c0_g1_i1	1	#N/A	K02992	RP-S7, MRPS7, rpsG	Ribosomal protein S7
TRINITY_DN97275_c0_g1_i1	1	#N/A	K03043	rpoB	DNA-directed RNA polymerase, beta subunit/140 kD subunit
TRINITY_DN99197_c0_g1_i1	3	#N/A	K02886	RP-L2, MRPL2, rplB	Ribosomal protein L2
TRINITY_DN33069_c0_g1_i2	1	#N/A	K02895	RP-L24, MRPL24, rplX	Ribosomal protein L24
TRINITY_DN98205_c0_g1_i1	6	GO:0031564	K08300	rne	Ribonuclease G or E
TRINITY_DN53721_c0_g1_i1	3	#N/A	K02878	RP-L16, MRPL16, rplP	Ribosomal protein L16/L10AE
TRINITY_DN16485_c1_g1_i1	2	#N/A	K02967	RP-S2, MRPS2, rpsB	Ribosomal protein S2
TRINITY_DN16460_c0_g1_i23	4	#N/A	NA	NA	Aspartyl-tRNA synthetase
TRINITY_DN16460_c0_g1_i25	6	#N/A	NA	NA	NA
TRINITY_DN17639_c0_g1_i1	1	#N/A	K03629	recF	Recombinational DNA repair ATPase RecF
TRINITY_DN17639_c0_g1_i3	4	#N/A	K03629	recF	Recombinational DNA repair ATPase RecF
TRINITY_DN32205_c0_g1_i3	6	#N/A	K00281	GLDC, gcvP	Glycine cleavage system protein P (pyridoxal-binding), N-terminal domain
TRINITY_DN67430_c0_g1_i1	5	#N/A	K05366	mrcA	Membrane carboxypeptidase/penicillin-binding protein
TRINITY_DN99757_c0_g1_i1	6	#N/A	K03545	tig	FKBP-type peptidyl-prolyl cis-trans isomerase (trigger factor)
TRINITY_DN54425_c0_g1_i1	5	#N/A	K02967	RP-S2, MRPS2, rpsB	Ribosomal protein S2
TRINITY_DN56299_c0_g2_i1	1	#N/A	K03046	rpoC	NA
TRINITY_DN3691_c0_g1_i86	4	#N/A	NA	NA	Acetyl/propionyl-CoA carboxylase, alpha subunit
TRINITY_DN75667_c0_g1_i1	2	#N/A	K03782	katG	Catalase (peroxidase I)
TRINITY_DN14592_c0_g2_i1	2	#N/A	K02111	ATPF1A, atpA	FoF1-type ATP synthase, alpha subunit
TRINITY_DN96863_c0_g1_i1	2	#N/A	K02338	dnaN	DNA polymerase III sliding clamp (beta) subunit, PCNA homolog
TRINITY_DN20115_c0_g1_i4	2	#N/A	NA	NA	NAD(P)-dependent dehydrogenase, short-chain alcohol dehydrogenase family
TRINITY_DN20115_c0_g1_i7	2	#N/A	NA	NA	NAD(P)-dependent dehydrogenase, short-chain alcohol dehydrogenase family
TRINITY_DN20125_c0_g4_i2	1	#N/A	K02358	tuf, TUFM	Translation elongation factor EF-Tu, a GTPase
TRINITY_DN20125_c0_g5_i1	6	#N/A	K02358	tuf, TUFM	Translation elongation factor EF-Tu, a GTPase
TRINITY_DN11892_c0_g1_i1	3	#N/A	K02990	RP-S6, MRPS6, rpsF	Ribosomal protein S6
TRINITY_DN11848_c0_g1_i1	4	#N/A	K07795	tctC	Tripartite-type tricarboxylate transporter, receptor component TctC
TRINITY_DN11848_c0_g1_i3	5	#N/A	K07795	tctC	Tripartite-type tricarboxylate transporter, receptor component TctC
TRINITY_DN78462_c0_g1_i1	2	#N/A	K14083	mttB	Trimethylamine:corrinoid methyltransferase
TRINITY_DN42229_c0_g1_i1	2	#N/A	K02948	RP-S11, MRPS11, rpsK	Ribosomal protein S11
TRINITY_DN42229_c0_g2_i1	1	#N/A	K03040	rpoA	DNA-directed RNA polymerase, alpha subunit/40 kD subunit
TRINITY_DN16963_c0_g1_i12	4	#N/A	K11688	dctP	TRAP-type C4-dicarboxylate transport system, periplasmic component
TRINITY_DN16955_c0_g2_i8	1	#N/A	K02358	tuf, TUFM	Translation elongation factor EF-Tu, a GTPase
TRINITY_DN33253_c0_g1_i1	5	#N/A	K00600	glyA, SHMT	Glycine/serine hydroxymethyltransferase
TRINITY_DN64553_c0_g1_i1	2	#N/A	K04077	groEL, HSPD1	Chaperonin GroEL (HSP60 family)
TRINITY_DN92312_c0_g1_i1	3	#N/A	K00059	fabG, OAR1	NAD(P)-dependent dehydrogenase, short-chain alcohol dehydrogenase family
TRINITY_DN12183_c0_g1_i25	1	#N/A	NA	NA	Heme/copper-type cytochrome/quinol oxidase, subunit 1
TRINITY_DN12183_c0_g1_i3	1	#N/A	K02256	COX1	Heme/copper-type cytochrome/quinol oxidase, subunit 1
TRINITY_DN12183_c1_g1_i2	1	#N/A	K03883	ND5	NADH:ubiquinone oxidoreductase subunit 5 (chain L)/Multisubunit Na+/H+ antiporter, MnhA subunit
TRINITY_DN9340_c0_g1_i3	3	#N/A	K01997	livH	Branched-chain amino acid ABC-type transport system, permease component
TRINITY_DN9340_c0_g1_i6	3	#N/A	K01997	livH	Branched-chain amino acid ABC-type transport system, permease component
TRINITY_DN9349_c2_g1_i1	1	#N/A	K02355	fusA, GFM, EFG	Translation elongation factor EF-G, a GTPase
TRINITY_DN9349_c2_g2_i1	5	#N/A	K02926	RP-L4, MRPL4, rplD	Ribosomal protein L4
TRINITY_DN9349_c2_g3_i2	1	#N/A	K02982	RP-S3, rpsC	Ribosomal protein S3
TRINITY_DN64418_c0_g1_i1	1	#N/A	K02045	cysA	ABC-type sulfate/molybdate transport systems, ATPase component
TRINITY_DN64474_c0_g1_i1	1	#N/A	K02113	ATPF1D, atpH	FoF1-type ATP synthase, delta subunit
TRINITY_DN74623_c0_g1_i1	2	#N/A	K04078	groES, HSPE1	Co-chaperonin GroES (HSP10)
TRINITY_DN74653_c0_g1_i1	4	#N/A	K02945	RP-S1, rpsA	Ribosomal protein S1
TRINITY_DN48074_c0_g2_i1	4	#N/A	K11069	potD	Spermidine/putrescine-binding periplasmic protein
TRINITY_DN76135_c0_g1_i1	2	#N/A	K01895	ACSS1_2, acs	Acyl-coenzyme A synthetase/AMP-(fatty) acid ligase
TRINITY_DN9622_c0_g3_i2	5	#N/A	K04094	trmFO, gid	Folate-dependent tRNA-U54 methylase TrmFO/GidA
TRINITY_DN2968_c0_g1_i42	4	#N/A	K02835	prfA, MTRF1, MRF1	Protein chain release factor A
TRINITY_DN2968_c0_g1_i98	4	#N/A	K02835	prfA, MTRF1, MRF1	Protein chain release factor A
TRINITY_DN2943_c0_g1_i12	6	#N/A	K01133	betC	Arylsulfatase A or related enzyme
TRINITY_DN2943_c0_g1_i2	4	#N/A	K01133	betC	Arylsulfatase A or related enzyme
TRINITY_DN2943_c0_g1_i20	1	#N/A	K01133	betC	Arylsulfatase A or related enzyme
TRINITY_DN2943_c0_g1_i3	6	#N/A	K01133	betC	Arylsulfatase A or related enzyme
TRINITY_DN35947_c0_g1_i1	1	#N/A	K02132	ATPeF1A, ATP5A1, ATP1	FoF1-type ATP synthase, alpha subunit
TRINITY_DN31454_c0_g1_i2	2	#N/A	K02992	RP-S7, MRPS7, rpsG	Ribosomal protein S7
TRINITY_DN31424_c0_g1_i1	4	#N/A	K02945	RP-S1, rpsA	Ribosomal protein S1
TRINITY_DN67978_c0_g1_i1	6	#N/A	K00554	trmD	tRNA G37 N-methylase TrmD
TRINITY_DN56868_c0_g1_i3	1	#N/A	K04077	groEL, HSPD1	Chaperonin GroEL (HSP60 family)
TRINITY_DN60589_c0_g1_i1	6	#N/A	K03696	clpC	ATP-dependent Clp protease ATP-binding subunit ClpA
TRINITY_DN89892_c0_g1_i1	5	#N/A	K01867	WARS, trpS	Tryptophanyl-tRNA synthetase
TRINITY_DN714_c0_g1_i9	5	#N/A	K13622	btaA	S-adenosylmethionine:diacylglycerol 3-amino-3-carboxypropyl transferase
TRINITY_DN70312_c0_g1_i1	1	#N/A	NA	NA	NADH:ubiquinone oxidoreductase subunit 5 (chain L)/Multisubunit Na+/H+ antiporter, MnhA subunit
TRINITY_DN90912_c0_g1_i1	6	#N/A	K03043	rpoB	DNA-directed RNA polymerase, beta subunit/140 kD subunit
TRINITY_DN31247_c0_g1_i2	1	#N/A	K02874	RP-L14, MRPL14, rplN	Ribosomal protein L14
TRINITY_DN79189_c0_g1_i1	6	#N/A	K06207	typA, bipA	Predicted membrane GTPase involved in stress response
TRINITY_DN79172_c0_g1_i1	6	#N/A	K02160	accB, bccP	Biotin carboxyl carrier protein
TRINITY_DN49634_c0_g2_i1	6	#N/A	K03086	rpoD	DNA-directed RNA polymerase, sigma subunit (sigma70/sigma32)
TRINITY_DN83967_c0_g1_i1	1	#N/A	K00525	E1.17.4.1A, nrdA, nrdE	NA
TRINITY_DN36628_c0_g2_i1	2	#N/A	K07335	bmpA, bmpB, tmpC	Basic membrane lipoprotein Med, periplasmic binding protein (PBP1-ABC) superfamily
TRINITY_DN46336_c0_g1_i1	2	#N/A	K03089	rpoH	DNA-directed RNA polymerase, sigma subunit (sigma70/sigma32)
TRINITY_DN118799_c0_g1_i1	1	#N/A	NA	NA	NADH:ubiquinone oxidoreductase subunit 6 (chain J)
TRINITY_DN118759_c0_g1_i1	2	#N/A	NA	NA	Choline-glycine betaine transporter
TRINITY_DN110987_c0_g1_i1	6	#N/A	K02946	RP-S10, MRPS10, rpsJ	Ribosomal protein S10
TRINITY_DN137576_c0_g1_i1	1	#N/A	NA	NA	NADH:ubiquinone oxidoreductase 49 kD subunit (chain D)
TRINITY_DN112057_c0_g1_i1	2	#N/A	K02357	tsf, TSFM	Translation elongation factor EF-Ts
TRINITY_DN111609_c0_g1_i1	1	#N/A	K03076	secY	Preprotein translocase subunit SecY
TRINITY_DN13828_c0_g1_i2	3	#N/A	K01847	MUT	Methylmalonyl-CoA mutase, N-terminal domain/subunit
TRINITY_DN181_c0_g1_i1	2	#N/A	NA	NA	NADH:ubiquinone oxidoreductase subunit 1 (chain H)
TRINITY_DN6241_c0_g1_i11	4	#N/A	NA	NA	NA
TRINITY_DN6241_c0_g1_i16	4	#N/A	NA	NA	NA
TRINITY_DN15622_c0_g1_i14	3	#N/A	NA	NA	NA
TRINITY_DN18168_c0_g1_i1	2	#N/A	NA	NA	TRAP-type mannitol/chloroaromatic compound transport system, periplasmic component
TRINITY_DN18168_c0_g1_i2	2	#N/A	NA	NA	TRAP-type mannitol/chloroaromatic compound transport system, periplasmic component
TRINITY_DN4526_c1_g2_i1	1	#N/A	K03881	ND4	NADH:ubiquinone oxidoreductase subunit 4 (chain M)
TRINITY_DN5060_c0_g1_i10	5	#N/A	K05521	draG	ADP-ribosylglycohydrolase
TRINITY_DN5060_c0_g1_i3	4	#N/A	K05521	draG	ADP-ribosylglycohydrolase
TRINITY_DN43824_c0_g1_i1	6	#N/A	NA	NA	NA
TRINITY_DN72471_c0_g1_i1	6	#N/A	K02261	COX2	Heme/copper-type cytochrome/quinol oxidase, subunit 2
TRINITY_DN16848_c0_g1_i2	3	#N/A	K02030	ABC.PA.S	ABC-type amino acid transport/signal transduction system, periplasmic component/domain
TRINITY_DN16848_c0_g1_i4	6	#N/A	K02030	ABC.PA.S	ABC-type amino acid transport/signal transduction system, periplasmic component/domain
TRINITY_DN61086_c0_g1_i1	2	#N/A	K00340	nuoK	NADH:ubiquinone oxidoreductase subunit 11 or 4L (chain K)
TRINITY_DN5875_c0_g1_i1	1	#N/A	K03310	TC.AGCS	Na+/alanine symporter
TRINITY_DN53847_c0_g1_i1	5	#N/A	K04564	SOD2	Superoxide dismutase
TRINITY_DN27792_c0_g3_i1	1	#N/A	NA	NA	NA
TRINITY_DN20973_c0_g1_i2	3	#N/A	K02078	acpP	Acyl carrier protein
TRINITY_DN27196_c0_g1_i4	4	#N/A	NA	NA	TRAP-type C4-dicarboxylate transport system, periplasmic component
TRINITY_DN27153_c0_g1_i4	1	#N/A	K21420	bpt	Arginyl-tRNAprotein-N-Asp/Glu arginylyltransferase
TRINITY_DN57824_c0_g1_i1	1	#N/A	K01693	hisB	Imidazoleglycerol phosphate dehydratase HisB
TRINITY_DN15516_c0_g3_i2	1	#N/A	K02132	ATPeF1A, ATP5A1, ATP1	FoF1-type ATP synthase, alpha subunit
TRINITY_DN33095_c0_g1_i3	2	#N/A	K02520	infC, MTIF3	Translation initiation factor IF-3
TRINITY_DN24042_c0_g1_i33	1	#N/A	NA	NA	NA
TRINITY_DN76175_c0_g1_i1	2	#N/A	NA	NA	L-ascorbate metabolism protein UlaG, beta-lactamase superfamily
TRINITY_DN9670_c0_g1_i1	1	#N/A	NA	NA	Cytochrome b subunit of the bc complex
TRINITY_DN99006_c0_g1_i1	1	#N/A	#N/A	#N/A	#N/A
TRINITY_DN52587_c0_g1_i2	6	GO:0019062	#N/A	#N/A	#N/A
TRINITY_DN91155_c0_g1_i1	3	#N/A	#N/A	#N/A	#N/A
TRINITY_DN53248_c0_g1_i1	3	#N/A	#N/A	#N/A	#N/A
TRINITY_DN56928_c0_g1_i1	3	#N/A	#N/A	#N/A	#N/A
TRINITY_DN20350_c0_g1_i1	5	#N/A	#N/A	#N/A	#N/A
TRINITY_DN30782_c0_g2_i1	6	#N/A	#N/A	#N/A	#N/A
TRINITY_DN113988_c0_g1_i1	5	#N/A	#N/A	#N/A	#N/A
TRINITY_DN47163_c0_g1_i4	4	GO:0010951	#N/A	#N/A	#N/A
TRINITY_DN40975_c0_g1_i2	1	#N/A	#N/A	#N/A	#N/A
TRINITY_DN7539_c0_g2_i1	1	GO:0005989	#N/A	#N/A	#N/A
TRINITY_DN11848_c0_g2_i1	4	#N/A	#N/A	#N/A	#N/A
TRINITY_DN56816_c0_g1_i2	3	#N/A	#N/A	#N/A	#N/A
TRINITY_DN15024_c0_g1_i11	5	GO:0006629	#N/A	#N/A	#N/A
TRINITY_DN15103_c0_g2_i15	3	#N/A	#N/A	#N/A	#N/A
TRINITY_DN21580_c0_g1_i10	1	GO:0009877	#N/A	#N/A	#N/A
TRINITY_DN130552_c0_g1_i1	4	#N/A	#N/A	#N/A	#N/A
TRINITY_DN52587_c3_g1_i1	1	#N/A	#N/A	#N/A	#N/A
TRINITY_DN19055_c0_g2_i2	4	GO:0071555	#N/A	#N/A	#N/A
TRINITY_DN58993_c0_g1_i2	5	#N/A	#N/A	#N/A	#N/A
TRINITY_DN30130_c0_g1_i26	1	#N/A	#N/A	#N/A	#N/A
TRINITY_DN39400_c0_g1_i24	6	GO:0046718	#N/A	#N/A	#N/A
TRINITY_DN18121_c0_g3_i1	1	#N/A	#N/A	#N/A	#N/A
TRINITY_DN84279_c0_g1_i1	3	#N/A	#N/A	#N/A	#N/A
TRINITY_DN109894_c0_g1_i1	6	#N/A	#N/A	#N/A	#N/A
TRINITY_DN104638_c0_g1_i1	4	GO:0010951	#N/A	#N/A	#N/A
TRINITY_DN25080_c0_g1_i2	3	#N/A	#N/A	#N/A	#N/A
[truncated: 743 more rows]

## Sheet: C2_abbrev
dnaK
RP-S1
NA
prx
groEL
aapJ
RP-L17
RP-S2
K06890
RP-S19
RP-S17
rpoC
fusA
tuf
tsf
aglE
dnaA
deaD
nuoN
xylF
RP-L7
betC
RP-L31
RP-L24
RP-L2
RP-L16
rpoB
c3lhypd
RP-L20
RP-S3
RP-S8
E2.6.1.18
RP-L14
RP-S7
RP-L6
ATPF1E
RP-L21
ABC.PA.S
IMPDH
pnp
katG
fabF
livG
sdhB
CARP
miaB
RP-L13
mmsA
rho
RP-S11
hflX
trmD
metK
UQCRFS1
RP-S4
RP-L5
infC
argC
K09117
groES
ATPF1B
tauA
ald
rpoD
E3.5.3.3
ihfB
cmk
CMO
E2.2.1.1
hupB
nusA
rimP
recA
livK
tpa
secY
rne
proV
purF
betA
ade
ATPF1A
dnaN
mttB
ACSS1_2
bmpA
rpoH
nuoK
HSPA9
rpsA
HSPD1
bztA
MRPL17
MRPS2
rpsS
MRPS17
GFM
TUFM
TSFM
ggtB
cshA
MRPL12
rpmE
MRPL24
MRPL2
MRPL16
MRPL20
rpsC
rpsH
MRPL14
MRPS7
MRPL6
atpC
MRPL21
guaB
PNPT1
OXSM
frdB
pepA
MRPL13
iolA
MRPS11
RIP1
rpsD
MRPL5
MTIF3
HSPE1
atpD
himD
tktA
PPAT
CHDH
atpA
acs
bmpB
rplQ
rpsB
rpsQ
EFG
rplL
rplX
rplB
rplP
rplT
rplN
rpsG
rplF
rplU
CEM1
rplM
ALDH6A1
rpsK
petA
rplE
tktB
tmpC

## Sheet: C5
Transcript	Cluster	GO from FANTASIA	KO	Gene	Module
TRINITY_DN7486_c0_g1_i1	5	#N/A	#N/A	#N/A	#N/A
TRINITY_DN468_c0_g1_i7	5	#N/A	#N/A	#N/A	#N/A
TRINITY_DN468_c0_g1_i6	5	GO:0030435	#N/A	#N/A	#N/A
TRINITY_DN1895_c0_g1_i200	5	#N/A	K01869	LARS, leuS	Leucyl-tRNA synthetase
TRINITY_DN468_c0_g1_i9	5	GO:0030683	#N/A	#N/A	#N/A
TRINITY_DN4130_c0_g1_i19	5	GO:0055085	K08720	ompU	Outer membrane protein (porin)
TRINITY_DN2365_c0_g1_i19	5	#N/A	NA	NA	Predicted ATPase
TRINITY_DN468_c0_g1_i2	5	GO:0030683	#N/A	#N/A	#N/A
TRINITY_DN4528_c0_g1_i14	5	GO:0071902	#N/A	#N/A	#N/A
TRINITY_DN7202_c0_g1_i7	5	#N/A	K00015	gyaR, GOR1	Lactate dehydrogenase or related 2-hydroxyacid dehydrogenase
TRINITY_DN10640_c0_g3_i1	5	#N/A	K04077	groEL, HSPD1	Chaperonin GroEL (HSP60 family)
TRINITY_DN93_c1_g1_i27	5	#N/A	NA	NA	NA
TRINITY_DN20184_c1_g2_i1	5	GO:0006094	NA	NA	NA
TRINITY_DN975_c0_g1_i2	5	#N/A	K09969	aapJ, bztA	ABC-type amino acid transport/signal transduction system, periplasmic component/domain
TRINITY_DN2858_c0_g1_i6	5	#N/A	K03234	EEF2	Translation elongation factor EF-G, a GTPase
TRINITY_DN468_c0_g1_i3	5	#N/A	#N/A	#N/A	#N/A
TRINITY_DN17141_c0_g1_i1	5	#N/A	#N/A	#N/A	#N/A
TRINITY_DN55352_c0_g2_i1	5	#N/A	K03782	katG	Catalase (peroxidase I)
TRINITY_DN4763_c0_g1_i5	5	#N/A	NA	NA	Xanthine/uracil permease
TRINITY_DN33095_c0_g1_i1	5	#N/A	K02916	RP-L35, MRPL35, rpmI	Ribosomal protein L35
TRINITY_DN10644_c0_g2_i1	5	#N/A	K02355	fusA, GFM, EFG	Translation elongation factor EF-G, a GTPase
TRINITY_DN16835_c0_g1_i1	5	#N/A	K00128	ALDH	Acyl-CoA reductase or other NAD-dependent aldehyde dehydrogenase
TRINITY_DN49268_c0_g1_i1	5	#N/A	K04087	hflC	Regulator of protease activity HflC, stomatin/prohibitin superfamily
TRINITY_DN45285_c0_g1_i1	5	#N/A	K03046	rpoC	DNA-directed RNA polymerase, beta' subunit/160 kD subunit
TRINITY_DN15119_c0_g1_i1	5	#N/A	K02108	ATPF0A, atpB	FoF1-type ATP synthase, membrane subunit a
TRINITY_DN54749_c0_g2_i1	5	#N/A	K02906	RP-L3, MRPL3, rplC	Ribosomal protein L3
TRINITY_DN36847_c0_g1_i1	5	#N/A	K13584	ctrA	DNA-binding response regulator, OmpR family, contains REC and winged-helix (wHTH) domain
TRINITY_DN35353_c0_g2_i1	5	#N/A	K04034	bchE	Radical SAM superfamily enzyme YgiQ, UPF0313 family
TRINITY_DN20973_c0_g1_i1	5	#N/A	K02078	acpP	Acyl carrier protein
TRINITY_DN59192_c0_g1_i1	5	#N/A	K03852	xsc	Acetolactate synthase large subunit or other thiamine pyrophosphate-requiring enzyme
TRINITY_DN30851_c0_g1_i1	5	#N/A	K02986	RP-S4, rpsD	Ribosomal protein S4 or related protein
TRINITY_DN77345_c0_g1_i1	5	#N/A	K14083	mttB	Trimethylamine:corrinoid methyltransferase
TRINITY_DN20661_c1_g1_i1	5	#N/A	K02111	ATPF1A, atpA	FoF1-type ATP synthase, alpha subunit
TRINITY_DN51611_c0_g1_i1	5	#N/A	NA	NA	Glycine cleavage system T protein (aminomethyltransferase)
TRINITY_DN108119_c0_g1_i1	5	#N/A	K02982	RP-S3, rpsC	Ribosomal protein S3
TRINITY_DN91963_c0_g1_i1	5	#N/A	K02967	RP-S2, MRPS2, rpsB	Ribosomal protein S2
TRINITY_DN76093_c0_g1_i1	5	#N/A	K21309	soeC	NA
TRINITY_DN51040_c0_g1_i1	5	#N/A	K02906	RP-L3, MRPL3, rplC	Ribosomal protein L3
TRINITY_DN53695_c0_g1_i1	5	GO:0006281	#N/A	#N/A	#N/A
TRINITY_DN24680_c2_g1_i2	5	GO:0043065	#N/A	#N/A	#N/A
TRINITY_DN16989_c0_g1_i1	5	#N/A	K03686	dnaJ	DnaJ-class molecular chaperone with C-terminal Zn finger domain
TRINITY_DN16989_c0_g1_i3	5	#N/A	K03686	dnaJ	DnaJ-class molecular chaperone with C-terminal Zn finger domain
TRINITY_DN38533_c0_g1_i2	5	#N/A	K00024	mdh	Malate/lactate dehydrogenase
TRINITY_DN36857_c0_g1_i8	5	#N/A	K11073	potF	Spermidine/putrescine-binding periplasmic protein
TRINITY_DN1268_c1_g1_i46	5	#N/A	NA	NA	NA
TRINITY_DN93_c0_g1_i19	5	#N/A	NA	NA	NA
TRINITY_DN9349_c2_g2_i4	5	#N/A	K02355	fusA, GFM, EFG	Translation elongation factor EF-G, a GTPase
TRINITY_DN20287_c0_g1_i39	5	#N/A	NA	NA	Threonine dehydratase
TRINITY_DN6118_c0_g1_i34	5	#N/A	K07127	uraH, pucM, hiuH	5-hydroxyisourate hydrolase (purine catabolism), transthyretin-related family
TRINITY_DN27130_c0_g1_i1	5	#N/A	K02113	ATPF1D, atpH	FoF1-type ATP synthase, delta subunit
TRINITY_DN23939_c0_g1_i1	5	#N/A	K00381	cysI	Sulfite reductase, beta subunit (hemoprotein)
TRINITY_DN22119_c0_g1_i14	5	#N/A	K02355	fusA, GFM, EFG	Translation elongation factor EF-G, a GTPase
TRINITY_DN51615_c0_g1_i1	5	#N/A	K02952	RP-S13, rpsM	Ribosomal protein S13
TRINITY_DN9054_c0_g1_i1	5	#N/A	K18334	fucD	L-alanine-DL-glutamate epimerase or related enzyme of enolase superfamily
TRINITY_DN5921_c0_g2_i1	5	#N/A	#N/A	#N/A	#N/A
TRINITY_DN20641_c2_g1_i1	5	#N/A	K02945	RP-S1, rpsA	Ribosomal protein S1
TRINITY_DN34530_c0_g3_i1	5	#N/A	K02935	RP-L7, MRPL12, rplL	Ribosomal protein L7/L12
TRINITY_DN47752_c0_g1_i2	5	#N/A	K02996	RP-S9, MRPS9, rpsI	Ribosomal protein S9
TRINITY_DN77210_c0_g1_i1	5	#N/A	K02897	RP-L25, rplY	Ribosomal protein L25 (general stress protein Ctc)
TRINITY_DN4130_c0_g1_i12	5	#N/A	K08720	ompU	Outer membrane protein (porin)
TRINITY_DN39400_c0_g1_i25	5	GO:0019072	#N/A	#N/A	#N/A
TRINITY_DN1450_c0_g1_i13	5	#N/A	K01847	MUT	Methylmalonyl-CoA mutase, N-terminal domain/subunit
TRINITY_DN120785_c0_g1_i1	5	#N/A	K02956	RP-S15, MRPS15, rpsO	Ribosomal protein S15P/S13E
TRINITY_DN104896_c0_g1_i1	5	#N/A	NA	NA	Outer membrane protein OmpA and related peptidoglycan-associated (lipo)proteins
TRINITY_DN45285_c0_g1_i2	5	#N/A	K03046	rpoC	DNA-directed RNA polymerase, beta' subunit/160 kD subunit
TRINITY_DN67660_c0_g1_i1	5	#N/A	K09458	fabF, OXSM, CEM1	3-oxoacyl-(acyl-carrier-protein) synthase
TRINITY_DN66523_c0_g1_i1	5	#N/A	K02994	RP-S8, rpsH	Ribosomal protein S8
TRINITY_DN35472_c0_g1_i1	5	#N/A	K02887	RP-L20, MRPL20, rplT	Ribosomal protein L20
TRINITY_DN17639_c0_g1_i2	5	#N/A	K03629	recF	Recombinational DNA repair ATPase RecF
TRINITY_DN54543_c0_g1_i1	5	#N/A	#N/A	#N/A	#N/A
TRINITY_DN20206_c0_g1_i3	5	GO:0009399	#N/A	#N/A	#N/A
TRINITY_DN49532_c0_g2_i10	5	GO:0071281	#N/A	#N/A	#N/A
TRINITY_DN25411_c0_g3_i4	5	GO:0039663	#N/A	#N/A	#N/A
TRINITY_DN27437_c0_g1_i11	5	#N/A	NA	NA	Transcriptional regulator, contains XRE-family HTH domain
TRINITY_DN122774_c0_g1_i1	5	#N/A	K03601	xseA	Exonuclease VII, large subunit
TRINITY_DN110849_c0_g1_i1	5	#N/A	NA	NA	NA
TRINITY_DN121349_c0_g1_i1	5	#N/A	K02988	RP-S5, MRPS5, rpsE	Ribosomal protein S5
TRINITY_DN121252_c0_g1_i1	5	#N/A	K01647	CS, gltA	Citrate synthase
TRINITY_DN136972_c0_g1_i1	5	#N/A	K03694	clpA	ATP-dependent Clp protease ATP-binding subunit ClpA
TRINITY_DN44494_c0_g1_i2	5	#N/A	K02275	coxB, ctaC	Heme/copper-type cytochrome/quinol oxidase, subunit 2
TRINITY_DN41733_c0_g1_i1	5	#N/A	K02876	RP-L15, MRPL15, rplO	Ribosomal protein L15
TRINITY_DN82818_c0_g1_i1	5	#N/A	K02886	RP-L2, MRPL2, rplB	Ribosomal protein L2
TRINITY_DN66163_c0_g1_i1	5	#N/A	K03040	rpoA	DNA-directed RNA polymerase, alpha subunit/40 kD subunit
TRINITY_DN71653_c0_g1_i1	5	#N/A	K03043	rpoB	DNA-directed RNA polymerase, beta subunit/140 kD subunit
TRINITY_DN22824_c1_g1_i1	5	#N/A	K02871	RP-L13, MRPL13, rplM	Ribosomal protein L13
TRINITY_DN12729_c0_g1_i1	5	#N/A	K08311	nudH	8-oxo-dGTP pyrophosphatase MutT and related house-cleaning NTP pyrophosphohydrolases, NUDIX family
TRINITY_DN82709_c0_g1_i1	5	#N/A	K03046	rpoC	NA
TRINITY_DN27113_c1_g1_i1	5	#N/A	K00020	HIBADH, mmsB	3-hydroxyisobutyrate dehydrogenase or related beta-hydroxyacid dehydrogenase
TRINITY_DN91199_c0_g1_i1	5	#N/A	K01358	clpP, CLPP	ATP-dependent protease ClpP, protease subunit
TRINITY_DN38576_c0_g1_i2	5	#N/A	K02302	cysG	Siroheme synthase (precorrin-2 oxidase/ferrochelatase domain)
TRINITY_DN56221_c0_g1_i2	5	GO:0007165	NA	NA	Ribosomal protein S15P/S13E
TRINITY_DN51702_c0_g1_i1	5	#N/A	K02276	coxC, ctaE	Heme/copper-type cytochrome/quinol oxidase, subunit 3
TRINITY_DN122849_c0_g1_i1	5	#N/A	K03851	tpa	Adenosylmethionine-8-amino-7-oxononanoate aminotransferase
TRINITY_DN49532_c0_g2_i2	5	GO:0071281	#N/A	#N/A	#N/A
TRINITY_DN12082_c0_g2_i8	5	GO:0044179	#N/A	#N/A	#N/A
TRINITY_DN6241_c0_g1_i7	5	#N/A	NA	NA	NA
TRINITY_DN27357_c0_g1_i2	5	#N/A	#N/A	#N/A	#N/A
TRINITY_DN27437_c0_g1_i13	5	#N/A	K00768	E2.4.2.21, cobU, cobT	NaMN:DMB phosphoribosyltransferase
TRINITY_DN121195_c0_g1_i1	5	#N/A	K02886	RP-L2, MRPL2, rplB	Ribosomal protein L2
TRINITY_DN111405_c0_g1_i1	5	#N/A	K03046	rpoC	DNA-directed RNA polymerase, beta' subunit/160 kD subunit
TRINITY_DN121417_c0_g1_i1	5	#N/A	K02959	RP-S16, MRPS16, rpsP	Ribosomal protein S16
TRINITY_DN144542_c0_g1_i1	5	#N/A	K02837	prfC	Peptide chain release factor RF-3
TRINITY_DN123258_c0_g1_i1	5	#N/A	K02793	manXa	Phosphotransferase system, mannose/fructose-specific component IIA
TRINITY_DN122597_c0_g1_i1	5	#N/A	K02357	tsf, TSFM	Translation elongation factor EF-Ts
TRINITY_DN106091_c0_g1_i1	5	#N/A	K04077	groEL, HSPD1	Chaperonin GroEL (HSP60 family)
TRINITY_DN134950_c0_g1_i1	5	#N/A	K02992	RP-S7, MRPS7, rpsG	Ribosomal protein S7
TRINITY_DN123651_c0_g1_i1	5	#N/A	K02115	ATPF1G, atpG	FoF1-type ATP synthase, gamma subunit
TRINITY_DN132737_c0_g1_i1	5	#N/A	K02887	RP-L20, MRPL20, rplT	Ribosomal protein L20
TRINITY_DN140142_c0_g1_i1	5	#N/A	K00413	CYC1, CYT1, petC	Cytochrome c1
TRINITY_DN105375_c0_g1_i1	5	#N/A	K02874	RP-L14, MRPL14, rplN	Ribosomal protein L14
TRINITY_DN133870_c0_g1_i1	5	#N/A	K02946	RP-S10, MRPS10, rpsJ	Ribosomal protein S10
TRINITY_DN61106_c0_g1_i1	5	#N/A	K02994	RP-S8, rpsH	Ribosomal protein S8
TRINITY_DN67608_c0_g1_i1	5	#N/A	K02876	RP-L15, MRPL15, rplO	Ribosomal protein L15
TRINITY_DN45393_c0_g1_i1	5	#N/A	K03531	ftsZ	Cell division GTPase FtsZ
TRINITY_DN63333_c0_g1_i1	5	#N/A	NA	NA	Heme/copper-type cytochrome/quinol oxidase, subunit 1
TRINITY_DN99229_c0_g1_i1	5	#N/A	K02221	yggT	Uncharacterized conserved protein YggT, Ycf19 family
TRINITY_DN74790_c0_g1_i1	5	#N/A	K03046	rpoC	DNA-directed RNA polymerase, beta' subunit/160 kD subunit
TRINITY_DN38220_c0_g1_i1	5	#N/A	K02967	RP-S2, MRPS2, rpsB	Ribosomal protein S2
TRINITY_DN37331_c0_g1_i1	5	#N/A	K07390	grxD, GLRX5	Glutaredoxin-related protein
TRINITY_DN60772_c0_g1_i1	5	#N/A	K02952	RP-S13, rpsM	Ribosomal protein S13
TRINITY_DN97469_c0_g1_i1	5	#N/A	K02600	nusA	NA
TRINITY_DN34530_c0_g1_i1	5	#N/A	K02863	RP-L1, MRPL1, rplA	Ribosomal protein L1
TRINITY_DN63907_c0_g1_i1	5	#N/A	K02035	ABC.PE.S	ABC-type oligopeptide transport system, periplasmic component
TRINITY_DN55297_c0_g2_i1	5	#N/A	K01491	folD	5,10-methylene-tetrahydrofolate dehydrogenase/Methenyl tetrahydrofolate cyclohydrolase
TRINITY_DN55257_c0_g1_i1	5	#N/A	K02939	RP-L9, MRPL9, rplI	Ribosomal protein L9
TRINITY_DN32116_c0_g2_i1	5	#N/A	K03782	katG	Catalase (peroxidase I)
TRINITY_DN33652_c0_g1_i2	5	#N/A	NA	NA	NA
TRINITY_DN81760_c0_g1_i1	5	#N/A	K03639	moaA, CNX2	Molybdenum cofactor biosynthesis enzyme MoaA
TRINITY_DN48731_c0_g1_i1	5	#N/A	K00962	pnp, PNPT1	Polyribonucleotide nucleotidyltransferase (polynucleotide phosphorylase)
TRINITY_DN74613_c0_g1_i1	5	#N/A	K00615	E2.2.1.1, tktA, tktB	Transketolase, C-terminal subunit
TRINITY_DN49192_c0_g1_i1	5	#N/A	K18989	vexF	Multidrug efflux pump subunit AcrB
TRINITY_DN32095_c0_g2_i1	5	#N/A	NA	NA	Choline-glycine betaine transporter
TRINITY_DN32381_c0_g1_i2	5	#N/A	K02518	infA	Translation initiation factor IF-1
TRINITY_DN137879_c0_g1_i1	5	#N/A	#N/A	#N/A	#N/A
TRINITY_DN104074_c0_g1_i2	5	#N/A	#N/A	#N/A	#N/A
TRINITY_DN15913_c0_g1_i10	5	#N/A	#N/A	#N/A	#N/A
TRINITY_DN36233_c0_g1_i1	5	#N/A	#N/A	#N/A	#N/A
TRINITY_DN124692_c0_g1_i1	5	#N/A	#N/A	#N/A	#N/A
TRINITY_DN63379_c0_g1_i1	5	#N/A	#N/A	#N/A	#N/A
TRINITY_DN140299_c0_g1_i1	5	#N/A	#N/A	#N/A	#N/A
TRINITY_DN141909_c0_g1_i1	5	#N/A	#N/A	#N/A	#N/A
TRINITY_DN66750_c0_g1_i1	5	GO:0009313	#N/A	#N/A	#N/A
TRINITY_DN4130_c0_g1_i31	5	#N/A	#N/A	#N/A	#N/A
TRINITY_DN60487_c0_g1_i1	5	#N/A	#N/A	#N/A	#N/A
TRINITY_DN35468_c0_g1_i1	5	#N/A	NA	NA	NA
TRINITY_DN11848_c0_g1_i4	5	#N/A	K07795	tctC	Tripartite-type tricarboxylate transporter, receptor component TctC
TRINITY_DN110042_c0_g1_i1	5	#N/A	K02001	proW	ABC-type proline/glycine betaine transport system, permease component
TRINITY_DN118310_c0_g1_i1	5	#N/A	K03521	fixA, etfB	Electron transfer flavoprotein, alpha and beta subunits
TRINITY_DN134792_c0_g1_i1	5	#N/A	K02879	RP-L17, MRPL17, rplQ	Ribosomal protein L17
TRINITY_DN139831_c0_g1_i1	5	#N/A	K10439	rbsB	ABC-type sugar transport system, periplasmic component, contains N-terminal xre family HTH domain
TRINITY_DN129140_c0_g1_i1	5	#N/A	K00162	PDHB, pdhB	Pyruvate/2-oxoglutarate/acetoin dehydrogenase complex, dehydrogenase (E1) component
TRINITY_DN104043_c0_g1_i1	5	GO:0019605	NA	NA	NA
TRINITY_DN136647_c0_g1_i1	5	#N/A	K03798	ftsH, hflB	ATP-dependent Zn proteases
TRINITY_DN119318_c0_g1_i1	5	#N/A	NA	NA	Murein DD-endopeptidase MepM and murein hydrolase activator NlpD, contain LysM domain
TRINITY_DN125606_c0_g1_i1	5	#N/A	K01338	lon	ATP-dependent Lon protease, bacterial type
TRINITY_DN132758_c0_g1_i1	5	#N/A	K03046	rpoC	NA
TRINITY_DN137306_c0_g1_i1	5	#N/A	K02313	dnaA	Chromosomal replication initiation ATPase DnaA
TRINITY_DN121772_c0_g1_i1	5	#N/A	K01338	lon	ATP-dependent Lon protease, bacterial type
TRINITY_DN107304_c0_g1_i1	5	#N/A	K02520	infC, MTIF3	NA
TRINITY_DN22228_c0_g1_i1	5	#N/A	K03046	rpoC	DNA-directed RNA polymerase, beta' subunit/160 kD subunit
TRINITY_DN52644_c0_g1_i1	5	#N/A	K01251	E3.3.1.1, ahcY	S-adenosylhomocysteine hydrolase
TRINITY_DN60339_c0_g1_i1	5	#N/A	K02111	ATPF1A, atpA	FoF1-type ATP synthase, alpha subunit
TRINITY_DN59087_c0_g1_i2	5	#N/A	K02945	RP-S1, rpsA	Ribosomal protein S1
TRINITY_DN54752_c0_g1_i1	5	#N/A	K02963	RP-S18, MRPS18, rpsR	Ribosomal protein S18
TRINITY_DN54291_c0_g1_i4	5	GO:0006865	K01999	livK	ABC-type branched-chain amino acid transport system, periplasmic component
TRINITY_DN48116_c0_g3_i1	5	#N/A	K00315	DMGDH	NA
TRINITY_DN66310_c0_g1_i1	5	#N/A	K02963	RP-S18, MRPS18, rpsR	Ribosomal protein S18
TRINITY_DN66379_c0_g1_i1	5	#N/A	K01647	CS, gltA	Citrate synthase
TRINITY_DN41155_c0_g1_i1	5	#N/A	K01784	galE, GALE	UDP-glucose 4-epimerase
TRINITY_DN57724_c0_g2_i1	5	#N/A	K02863	RP-L1, MRPL1, rplA	Ribosomal protein L1
TRINITY_DN36869_c0_g1_i1	5	GO:0006974	NA	NA	Uncharacterized conserved protein, YHS domain
TRINITY_DN76795_c0_g1_i1	5	#N/A	K00615	E2.2.1.1, tktA, tktB	Transketolase
TRINITY_DN80938_c0_g1_i1	5	#N/A	K00962	pnp, PNPT1	Polyribonucleotide nucleotidyltransferase (polynucleotide phosphorylase)
TRINITY_DN11059_c0_g1_i1	5	#N/A	K02860	rimM	Ribosomal 30S subunit maturation factor RimM, required for 16S rRNA processing
TRINITY_DN81273_c0_g1_i1	5	#N/A	K03168	topA	DNA topoisomerase IA
TRINITY_DN15622_c0_g1_i23	5	#N/A	K07341	doc	Prophage maintenance system killer protein
TRINITY_DN69840_c0_g1_i1	5	#N/A	K00962	pnp, PNPT1	Polyribonucleotide nucleotidyltransferase (polynucleotide phosphorylase)
TRINITY_DN92169_c0_g1_i1	5	#N/A	K01637	E4.1.3.1, aceA	Isocitrate lyase
TRINITY_DN49362_c0_g1_i1	5	#N/A	K02961	RP-S17, MRPS17, rpsQ	Ribosomal protein S17
TRINITY_DN49362_c0_g2_i1	5	#N/A	K02931	RP-L5, MRPL5, rplE	Ribosomal protein L5
TRINITY_DN54099_c0_g1_i1	5	#N/A	K03320	amt, AMT, MEP	Ammonia channel protein AmtB
TRINITY_DN41372_c0_g1_i1	5	GO:0006865	K01999	livK	ABC-type branched-chain amino acid transport system, periplasmic component
TRINITY_DN28824_c0_g1_i1	5	GO:0061077	NA	NA	Putative Zn-dependent protease, contains TPR repeats
TRINITY_DN46732_c0_g1_i2	5	#N/A	K02933	RP-L6, MRPL6, rplF	Ribosomal protein L6P/L9E
TRINITY_DN20621_c0_g1_i3	5	#N/A	K00864	glpK, GK	Glycerol kinase
TRINITY_DN75066_c0_g1_i1	5	#N/A	NA	NA	Predicted Na+-dependent transporter
TRINITY_DN47414_c0_g1_i1	5	#N/A	K04077	groEL, HSPD1	Chaperonin GroEL (HSP60 family)
TRINITY_DN49532_c0_g3_i1	5	#N/A	K00053	ilvC	Ketol-acid reductoisomerase
TRINITY_DN21887_c0_g1_i1	5	#N/A	K03043	rpoB	DNA-directed RNA polymerase, beta subunit/140 kD subunit
TRINITY_DN21887_c0_g1_i3	5	#N/A	K03043	rpoB	DNA-directed RNA polymerase, beta subunit/140 kD subunit
TRINITY_DN14906_c1_g1_i7	5	#N/A	NA	NA	NADH:ubiquinone oxidoreductase subunit 4 (chain M)
TRINITY_DN9533_c0_g1_i8	5	#N/A	NA	NA	Ankyrin repeat
TRINITY_DN5036_c0_g1_i18	5	#N/A	K12255	gbuA	Arginase family enzyme
TRINITY_DN42353_c0_g4_i1	5	#N/A	K02965	RP-S19, rpsS	Ribosomal protein S19
TRINITY_DN41064_c0_g1_i1	5	#N/A	K02890	RP-L22, MRPL22, rplV	Ribosomal protein L22
TRINITY_DN7727_c0_g1_i1	5	#N/A	NA	NA	NA
TRINITY_DN50389_c0_g1_i1	5	#N/A	K01938	fhs	Formyltetrahydrofolate synthetase
TRINITY_DN94829_c0_g1_i1	5	#N/A	K03628	rho	Transcription termination factor Rho
TRINITY_DN19938_c0_g1_i1	5	#N/A	K02935	RP-L7, MRPL12, rplL	Ribosomal protein L7/L12
TRINITY_DN53632_c2_g1_i1	5	GO:0006457	K03770	ppiD	NA
TRINITY_DN80469_c0_g1_i1	5	#N/A	K00681	ggt	Gamma-glutamyltranspeptidase
TRINITY_DN10644_c0_g1_i4	5	#N/A	K02358	tuf, TUFM	Translation elongation factor EF-Tu, a GTPase
TRINITY_DN34383_c0_g4_i2	5	#N/A	K03043	rpoB	DNA-directed RNA polymerase, beta subunit/140 kD subunit
TRINITY_DN29320_c0_g1_i1	5	#N/A	K01358	clpP, CLPP	ATP-dependent protease ClpP, protease subunit
TRINITY_DN68512_c0_g1_i1	5	#N/A	K00164	OGDH, sucA	2-oxoglutarate dehydrogenase complex, dehydrogenase (E1) component, and related enzymes
TRINITY_DN15885_c0_g1_i6	5	#N/A	K02035	ABC.PE.S	ABC-type transport system, periplasmic component
TRINITY_DN36576_c0_g1_i1	5	#N/A	K00315	DMGDH	Glycine cleavage system T protein (aminomethyltransferase)
TRINITY_DN38969_c0_g1_i2	5	#N/A	K02358	tuf, TUFM	Translation elongation factor EF-Tu, a GTPase
TRINITY_DN50685_c0_g1_i1	5	#N/A	K08301	rng, cafA	Ribonuclease G or E
TRINITY_DN55908_c0_g1_i1	5	#N/A	K02567	napA	Anaerobic selenocysteine-containing dehydrogenase
TRINITY_DN79779_c0_g1_i1	5	GO:0046740	NA	NA	Predicted phage phi-C31 gp36 major capsid-like protein
TRINITY_DN94228_c0_g1_i1	5	#N/A	K03076	secY	Preprotein translocase subunit SecY
TRINITY_DN53865_c0_g1_i1	5	#N/A	K01938	fhs	Formyltetrahydrofolate synthetase
TRINITY_DN59192_c0_g2_i1	5	#N/A	K03852	xsc	Acetolactate synthase large subunit or other thiamine pyrophosphate-requiring enzyme
TRINITY_DN27153_c0_g1_i1	5	#N/A	K15977	K15977	Uncharacterized membrane protein YphA, DoxX/SURF4 family
TRINITY_DN43522_c0_g1_i1	5	#N/A	K01251	E3.3.1.1, ahcY	S-adenosylhomocysteine hydrolase
TRINITY_DN27244_c0_g1_i3	5	#N/A	K02888	RP-L21, MRPL21, rplU	Ribosomal protein L21
TRINITY_DN2011_c0_g1_i7	5	#N/A	K07305	msrB	Peptide methionine sulfoxide reductase MsrB
TRINITY_DN67430_c0_g1_i1	5	#N/A	K05366	mrcA	Membrane carboxypeptidase/penicillin-binding protein
TRINITY_DN54425_c0_g1_i1	5	#N/A	K02967	RP-S2, MRPS2, rpsB	Ribosomal protein S2
TRINITY_DN11848_c0_g1_i3	5	#N/A	K07795	tctC	Tripartite-type tricarboxylate transporter, receptor component TctC
TRINITY_DN33253_c0_g1_i1	5	#N/A	K00600	glyA, SHMT	Glycine/serine hydroxymethyltransferase
TRINITY_DN9349_c2_g2_i1	5	#N/A	K02926	RP-L4, MRPL4, rplD	Ribosomal protein L4
TRINITY_DN9622_c0_g3_i2	5	#N/A	K04094	trmFO, gid	Folate-dependent tRNA-U54 methylase TrmFO/GidA
TRINITY_DN89892_c0_g1_i1	5	#N/A	K01867	WARS, trpS	Tryptophanyl-tRNA synthetase
TRINITY_DN714_c0_g1_i9	5	#N/A	K13622	btaA	S-adenosylmethionine:diacylglycerol 3-amino-3-carboxypropyl transferase
TRINITY_DN5060_c0_g1_i10	5	#N/A	K05521	draG	ADP-ribosylglycohydrolase
TRINITY_DN53847_c0_g1_i1	5	#N/A	K04564	SOD2	Superoxide dismutase
TRINITY_DN20350_c0_g1_i1	5	#N/A	#N/A	#N/A	#N/A
TRINITY_DN113988_c0_g1_i1	5	#N/A	#N/A	#N/A	#N/A
TRINITY_DN15024_c0_g1_i11	5	GO:0006629	#N/A	#N/A	#N/A
TRINITY_DN58993_c0_g1_i2	5	#N/A	#N/A	#N/A	#N/A
TRINITY_DN81720_c0_g1_i1	5	#N/A	#N/A	#N/A	#N/A
TRINITY_DN15024_c1_g1_i1	5	#N/A	#N/A	#N/A	#N/A
TRINITY_DN15913_c0_g1_i14	5	#N/A	#N/A	#N/A	#N/A
TRINITY_DN102961_c0_g1_i1	5	#N/A	#N/A	#N/A	#N/A
TRINITY_DN108853_c0_g1_i1	5	#N/A	#N/A	#N/A	#N/A
TRINITY_DN15582_c2_g1_i1	5	GO:0051607	#N/A	#N/A	#N/A
TRINITY_DN51071_c0_g1_i1	5	#N/A	#N/A	#N/A	#N/A
TRINITY_DN46369_c0_g1_i1	5	#N/A	#N/A	#N/A	#N/A
TRINITY_DN120394_c0_g1_i1	5	#N/A	#N/A	#N/A	#N/A
TRINITY_DN54707_c1_g1_i1	5	#N/A	#N/A	#N/A	#N/A
TRINITY_DN88450_c0_g1_i1	5	#N/A	#N/A	#N/A	#N/A
TRINITY_DN53023_c0_g1_i1	5	#N/A	#N/A	#N/A	#N/A
TRINITY_DN35169_c0_g1_i3	5	#N/A	#N/A	#N/A	#N/A
TRINITY_DN12082_c0_g2_i7	5	GO:0009102	#N/A	#N/A	#N/A
TRINITY_DN81091_c0_g1_i1	5	#N/A	#N/A	#N/A	#N/A
TRINITY_DN129871_c0_g1_i1	5	#N/A	#N/A	#N/A	#N/A
TRINITY_DN63951_c0_g1_i1	5	#N/A	#N/A	#N/A	#N/A
TRINITY_DN33225_c0_g1_i2	5	GO:0001580	#N/A	#N/A	#N/A
TRINITY_DN29685_c0_g1_i1	5	GO:0010951	#N/A	#N/A	#N/A
TRINITY_DN135684_c0_g1_i1	5	#N/A	#N/A	#N/A	#N/A
TRINITY_DN94019_c0_g1_i1	5	#N/A	#N/A	#N/A	#N/A
TRINITY_DN53632_c1_g1_i1	5	#N/A	#N/A	#N/A	#N/A
TRINITY_DN16040_c1_g2_i2	5	GO:0010951	#N/A	#N/A	#N/A
TRINITY_DN468_c0_g1_i12	5	GO:0030683	#N/A	#N/A	#N/A
TRINITY_DN15103_c1_g1_i3	5	GO:0000122	#N/A	#N/A	#N/A
TRINITY_DN75756_c0_g1_i1	5	#N/A	#N/A	#N/A	#N/A
TRINITY_DN52426_c0_g1_i1	5	GO:0010951	#N/A	#N/A	#N/A
TRINITY_DN36179_c0_g1_i1	5	#N/A	#N/A	#N/A	#N/A
TRINITY_DN68994_c0_g1_i1	5	#N/A	#N/A	#N/A	#N/A
TRINITY_DN84599_c0_g1_i1	5	#N/A	#N/A	#N/A	#N/A
TRINITY_DN120077_c0_g1_i1	5	#N/A	#N/A	#N/A	#N/A
TRINITY_DN125305_c0_g1_i1	5	#N/A	#N/A	#N/A	#N/A
TRINITY_DN12491_c0_g2_i1	5	#N/A	#N/A	#N/A	#N/A
TRINITY_DN64174_c0_g1_i1	5	#N/A	#N/A	#N/A	#N/A
TRINITY_DN79458_c0_g1_i1	5	#N/A	#N/A	#N/A	#N/A
TRINITY_DN36456_c0_g1_i1	5	GO:0045299	#N/A	#N/A	#N/A
TRINITY_DN71857_c0_g1_i1	5	#N/A	#N/A	#N/A	#N/A
TRINITY_DN78821_c0_g1_i1	5	#N/A	#N/A	#N/A	#N/A
TRINITY_DN3782_c0_g1_i27	5	GO:0006811	#N/A	#N/A	#N/A
TRINITY_DN19039_c0_g1_i4	5	#N/A	#N/A	#N/A	#N/A
TRINITY_DN67119_c0_g1_i1	5	#N/A	#N/A	#N/A	#N/A
TRINITY_DN145535_c0_g1_i1	5	#N/A	#N/A	#N/A	#N/A
TRINITY_DN39400_c0_g3_i1	5	#N/A	#N/A	#N/A	#N/A
TRINITY_DN27357_c0_g1_i5	5	#N/A	#N/A	#N/A	#N/A
TRINITY_DN4130_c0_g1_i2	5	#N/A	#N/A	#N/A	#N/A
TRINITY_DN50347_c0_g1_i13	5	GO:0010951	#N/A	#N/A	#N/A
TRINITY_DN33309_c0_g1_i1	5	GO:0010951	#N/A	#N/A	#N/A
TRINITY_DN20380_c3_g1_i1	5	#N/A	#N/A	#N/A	#N/A
TRINITY_DN15582_c1_g1_i3	5	GO:0039563	#N/A	#N/A	#N/A
TRINITY_DN87873_c0_g1_i1	5	#N/A	#N/A	#N/A	#N/A
TRINITY_DN52587_c0_g4_i1	5	#N/A	#N/A	#N/A	#N/A
TRINITY_DN109078_c0_g1_i1	5	#N/A	#N/A	#N/A	#N/A
TRINITY_DN66238_c0_g1_i1	5	#N/A	#N/A	#N/A	#N/A
TRINITY_DN128503_c0_g1_i1	5	#N/A	#N/A	#N/A	#N/A
TRINITY_DN33667_c0_g1_i1	5	#N/A	#N/A	#N/A	#N/A
TRINITY_DN95172_c0_g1_i1	5	#N/A	#N/A	#N/A	#N/A
TRINITY_DN105416_c0_g1_i1	5	#N/A	#N/A	#N/A	#N/A
TRINITY_DN17910_c0_g1_i2	5	#N/A	#N/A	#N/A	#N/A
TRINITY_DN33555_c0_g1_i1	5	#N/A	#N/A	#N/A	#N/A
TRINITY_DN38363_c0_g1_i1	5	#N/A	#N/A	#N/A	#N/A
TRINITY_DN132838_c0_g1_i1	5	#N/A	#N/A	#N/A	#N/A
TRINITY_DN52780_c0_g2_i1	5	#N/A	#N/A	#N/A	#N/A
TRINITY_DN21869_c0_g1_i9	5	#N/A	#N/A	#N/A	#N/A
TRINITY_DN115967_c0_g1_i1	5	#N/A	#N/A	#N/A	#N/A
TRINITY_DN15913_c0_g1_i4	5	#N/A	#N/A	#N/A	#N/A
TRINITY_DN24469_c1_g2_i1	5	GO:0010951	#N/A	#N/A	#N/A
TRINITY_DN12082_c0_g2_i2	5	#N/A	#N/A	#N/A	#N/A
TRINITY_DN139613_c0_g1_i1	5	#N/A	#N/A	#N/A	#N/A
TRINITY_DN15103_c0_g2_i9	5	GO:0010951	#N/A	#N/A	#N/A
TRINITY_DN11623_c1_g1_i3	5	#N/A	#N/A	#N/A	#N/A
TRINITY_DN55618_c0_g1_i1	5	#N/A	#N/A	#N/A	#N/A
TRINITY_DN49666_c0_g1_i1	5	GO:0010951	#N/A	#N/A	#N/A
TRINITY_DN33667_c0_g1_i2	5	#N/A	#N/A	#N/A	#N/A
TRINITY_DN45438_c0_g1_i2	5	GO:0090326	#N/A	#N/A	#N/A
TRINITY_DN62972_c0_g1_i1	5	#N/A	#N/A	#N/A	#N/A
TRINITY_DN30130_c0_g1_i30	5	#N/A	#N/A	#N/A	#N/A
TRINITY_DN81353_c0_g1_i1	5	#N/A	#N/A	#N/A	#N/A
TRINITY_DN108194_c0_g1_i1	5	#N/A	#N/A	#N/A	#N/A
TRINITY_DN128921_c0_g1_i1	5	#N/A	#N/A	#N/A	#N/A
TRINITY_DN37058_c0_g1_i1	5	#N/A	#N/A	#N/A	#N/A
TRINITY_DN12833_c1_g1_i1	5	#N/A	#N/A	#N/A	#N/A
TRINITY_DN19055_c0_g2_i3	5	GO:0071555	#N/A	#N/A	#N/A
TRINITY_DN27259_c0_g1_i2	5	GO:0006689	#N/A	#N/A	#N/A
TRINITY_DN71630_c0_g1_i1	5	#N/A	#N/A	#N/A	#N/A

## Sheet: C5_abbrev
Gene
#N/A
LARS
ompU
NA
gyaR
groEL
aapJ
EEF2
katG
RP-L35
fusA
ALDH
hflC
rpoC
ATPF0A
RP-L3
ctrA
bchE
acpP
xsc
RP-S4
mttB
ATPF1A
RP-S3
RP-S2
soeC
dnaJ
mdh
potF
uraH
ATPF1D
cysI
RP-S13
fucD
RP-S1
RP-L7
RP-S9
RP-L25
MUT
RP-S15
fabF
RP-S8
RP-L20
recF
xseA
RP-S5
CS
clpA
coxB
RP-L15
RP-L2
rpoA
rpoB
RP-L13
nudH
HIBADH
clpP
cysG
coxC
tpa
E2.4.2.21
RP-S16
prfC
manXa
tsf
RP-S7
ATPF1G
CYC1
RP-L14
RP-S10
ftsZ
yggT
grxD
nusA
RP-L1
ABC.PE.S
folD
RP-L9
moaA
pnp
E2.2.1.1
vexF
infA
tctC
proW
fixA
RP-L17
rbsB
PDHB
ftsH
lon
dnaA
infC
E3.3.1.1
RP-S18
livK
DMGDH
galE
rimM
topA
doc
E4.1.3.1
RP-S17
RP-L5
amt
RP-L6
glpK
ilvC
gbuA
RP-S19
RP-L22
fhs
rho
ppiD
ggt
tuf
OGDH
rng
napA
secY
K15977
RP-L21
msrB
mrcA
glyA
RP-L4
trmFO
WARS
btaA
draG
SOD2
leuS
GOR1
HSPD1
bztA
MRPL35
GFM
atpB
MRPL3
rpsD
atpA
rpsC
MRPS2
pucM
atpH
rpsM
rpsA
MRPL12
MRPS9
rplY
MRPS15
OXSM
rpsH
MRPL20
MRPS5
gltA
ctaC
MRPL15
MRPL2
MRPL13
mmsB
CLPP
ctaE
cobU
MRPS16
TSFM
MRPS7
atpG
CYT1
MRPL14
MRPS10
GLRX5
MRPL1
MRPL9
CNX2
PNPT1
tktA
etfB
MRPL17
pdhB
hflB
MTIF3
ahcY
MRPS18
GALE
aceA
MRPS17
MRPL5
AMT
MRPL6
GK
rpsS
MRPL22
TUFM
sucA
cafA
MRPL21
SHMT
MRPL4
gid
trpS
rpmI
EFG
rplC
rpsB
hiuH
rplL
rpsI
rpsO
CEM1
rplT
rpsE
rplO
rplB
rplM
cobT
rpsP
rpsG
petC
rplN
rpsJ
rplA
rplI
tktB
rplQ
rpsR
rpsQ
rplE
MEP
rplF
rplV
rplU
rplD

## Sheet: enrichment_C5
Enrichment FDR	nGenes	Pathway Genes	Fold Enrichment	Pathway	URL	Genes
7.17e-40	32	55	28.4172	GO:0002181 cytoplasmic translation	HTTP://AMIGO.GENEONTOLOGY.ORG/AMIGO/TERM/GO:0002181	rplB rplF rplA rplC rplD rplE rplI rplL rplM rplN rplO rplQ rplT rplU rplV rplY rpmI rpsA rpsB rpsC rpsD rpsE rpsG rpsH rpsI rpsJ rpsM rpsO rpsP rpsQ rpsR rpsS
2.75e-39	39	108	17.6374	GO:0006412 translation	HTTP://AMIGO.GENEONTOLOGY.ORG/AMIGO/TERM/GO:0006412	fusA rpsD rpsM rplQ rplD rplV rplA rpsS rpsP rplN rplM rplC rplY rplB infA rplE rplU leuS rpsQ rpsJ rpsC rpsO rpsR tsf rpsI rpsG rpsH rpsA infC rplO trpS rpmI rpsE rplI rplT rplF rplL rpsB prfC
4.32e-14	12	21	27.9098	GO:0000028 ribosomal small subunit assembly	HTTP://AMIGO.GENEONTOLOGY.ORG/AMIGO/TERM/GO:0000028	rpsO rimM rpsS rpsA rpsP rpsD rpsQ rpsB rpsH rpsG rpsC rpsE
3.32e-06	8	29	13.4737	GO:0000027 ribosomal large subunit assembly	HTTP://AMIGO.GENEONTOLOGY.ORG/AMIGO/TERM/GO:0000027	rplY rplF rplA rplE rplQ rplC rplT rplB
5.21e-05	5	11	22.201	GO:0032784 regulation of DNA-templated transcription elongation	HTTP://AMIGO.GENEONTOLOGY.ORG/AMIGO/TERM/GO:0032784	nusA rpoA rpoB rpoC rpsJ
7.4e-05	9	60	7.32632	GO:0009408 response to heat	HTTP://AMIGO.GENEONTOLOGY.ORG/AMIGO/TERM/GO:0009408	lon pnp dnaJ clpP moaA hflC rpoA rpoB rpoC
7.4e-05	4	6	32.5614	GO:0006353 DNA-templated transcription termination	HTTP://AMIGO.GENEONTOLOGY.ORG/AMIGO/TERM/GO:0006353	rplD rpsD rho nusA
0.00019839	5	15	16.2807	GO:0017148 negative regulation of translation	HTTP://AMIGO.GENEONTOLOGY.ORG/AMIGO/TERM/GO:0017148	rplD rplM rplY rplT rpsG
0.00020823	6	26	11.2713	GO:0031564 transcription antitermination	HTTP://AMIGO.GENEONTOLOGY.ORG/AMIGO/TERM/GO:0031564	rpsD nusA rpsJ rpoA rpoB rpoC
0.00020823	4	8	24.4211	GO:0042777 proton motive force-driven plasma membrane ATP synthesis	HTTP://AMIGO.GENEONTOLOGY.ORG/AMIGO/TERM/GO:0042777	atpG atpB atpA atpH
0.00030744	4	9	21.7076	GO:0015986 proton motive force-driven ATP synthesis	HTTP://AMIGO.GENEONTOLOGY.ORG/AMIGO/TERM/GO:0015986	atpB atpA atpH atpG
0.00030744	4	9	21.7076	GO:0006754 ATP biosynthetic process	HTTP://AMIGO.GENEONTOLOGY.ORG/AMIGO/TERM/GO:0006754	atpH atpB atpG atpA
0.00218146	3	6	24.4211	GO:0090605 submerged biofilm formation	HTTP://AMIGO.GENEONTOLOGY.ORG/AMIGO/TERM/GO:0090605	rpoA rpoB rpoC
0.00218146	3	6	24.4211	GO:0006515 protein quality control for misfolded or incompletely synthesized proteins	HTTP://AMIGO.GENEONTOLOGY.ORG/AMIGO/TERM/GO:0006515	lon clpP clpA
0.00305542	9	104	4.22672	GO:0046677 response to antibiotic	HTTP://AMIGO.GENEONTOLOGY.ORG/AMIGO/TERM/GO:0046677	rplF rpsD rpoC rplV rplD rpsE rpoB rpsQ mrcA
0.00369017	5	30	8.14035	GO:0006417 regulation of translation	HTTP://AMIGO.GENEONTOLOGY.ORG/AMIGO/TERM/GO:0006417	rplD rpsD rpsO rpsH rplA
0.00488204	3	8	18.3158	GO:0009236 cobalamin biosynthetic process	HTTP://AMIGO.GENEONTOLOGY.ORG/AMIGO/TERM/GO:0009236	cobU cysG cobT
0.00681375	3	9	16.2807	GO:0048870 cell motility	HTTP://AMIGO.GENEONTOLOGY.ORG/AMIGO/TERM/GO:0048870	rpoA rpoB rpoC
0.0124089	2	3	32.5614	GO:0032790 ribosome disassembly	HTTP://AMIGO.GENEONTOLOGY.ORG/AMIGO/TERM/GO:0032790	fusA infC
0.0143997	4	25	7.81474	GO:0042254 ribosome biogenesis	HTTP://AMIGO.GENEONTOLOGY.ORG/AMIGO/TERM/GO:0042254	nusA rimM rpsJ rpsD
0.0159557	4	26	7.51417	GO:0042128 nitrate assimilation	HTTP://AMIGO.GENEONTOLOGY.ORG/AMIGO/TERM/GO:0042128	napA rpoA rpoB rpoC
0.0220838	4	29	6.73684	GO:0006099 tricarboxylic acid cycle	HTTP://AMIGO.GENEONTOLOGY.ORG/AMIGO/TERM/GO:0006099	aceA gltA sucA mdh
0.0220838	3	14	10.4662	GO:0006352 DNA-templated transcription initiation	HTTP://AMIGO.GENEONTOLOGY.ORG/AMIGO/TERM/GO:0006352	rpoA rpoB rpoC
0.0318781	2	5	19.5368	GO:0010466 negative regulation of peptidase activity	HTTP://AMIGO.GENEONTOLOGY.ORG/AMIGO/TERM/GO:0010466	ftsH hflC
0.0419385	2	6	16.2807	GO:0035999 tetrahydrofolate interconversion	HTTP://AMIGO.GENEONTOLOGY.ORG/AMIGO/TERM/GO:0035999	folD glyA
0.0419385	2	6	16.2807	GO:1990145 maintenance of translational fidelity	HTTP://AMIGO.GENEONTOLOGY.ORG/AMIGO/TERM/GO:1990145	rpsE rpsD
0.0419385	2	6	16.2807	GO:0006413 translational initiation	HTTP://AMIGO.GENEONTOLOGY.ORG/AMIGO/TERM/GO:0006413	infA infC
0.0420519	3	19	7.71191	GO:0036460 cellular response to cell envelope stress	HTTP://AMIGO.GENEONTOLOGY.ORG/AMIGO/TERM/GO:0036460	rpoA rpoB rpoC
0.0420519	3	19	7.71191	GO:2000142 regulation of DNA-templated transcription initiation	HTTP://AMIGO.GENEONTOLOGY.ORG/AMIGO/TERM/GO:2000142	rpoA rpoB rpoC
0.0434504	2	7	13.9549	GO:0030163 protein catabolic process	HTTP://AMIGO.GENEONTOLOGY.ORG/AMIGO/TERM/GO:0030163	lon ftsH
0.0434504	2	7	13.9549	GO:0030490 maturation of SSU-rRNA	HTTP://AMIGO.GENEONTOLOGY.ORG/AMIGO/TERM/GO:0030490	rng rimM
0.0434504	2	7	13.9549	GO:0032297 negative regulation of DNA-templated DNA replication initiation	HTTP://AMIGO.GENEONTOLOGY.ORG/AMIGO/TERM/GO:0032297	dnaA rplB
0.0434504	2	7	13.9549	GO:0042255 ribosome assembly	HTTP://AMIGO.GENEONTOLOGY.ORG/AMIGO/TERM/GO:0042255	rplD rplV
0.0434504	2	7	13.9549	GO:0045947 negative regulation of translational initiation	HTTP://AMIGO.GENEONTOLOGY.ORG/AMIGO/TERM/GO:0045947	rplA rpsD
0.0434504	4	38	5.14127	GO:0055072 iron ion homeostasis	HTTP://AMIGO.GENEONTOLOGY.ORG/AMIGO/TERM/GO:0055072	grxD rpoA rpoB rpoC
0.0434504	2	7	13.9549	GO:0006414 translational elongation	HTTP://AMIGO.GENEONTOLOGY.ORG/AMIGO/TERM/GO:0006414	tsf fusA
