# Supplementary material for: Phagocytosis of microbial symbionts supports embryonic nutrition in the sponge Halichondria panicea
Source: Research Square preprint supplement (doi:10.21203/rs.3.rs-7749905/v1), 2025-12-02
Supplement: Supplementary file 9 [file e2a4f08e77173dd48c0780a8.xlsx]

## Sheet: N_genes_clusters
Clusters	Number of genes
1	10890
2	9732
3	5843
4	7509
5	16774
6	11641
7	11634

## Sheet: Cluster_mfuzz_rnaseq_c7_sponge
Contig	Cluster
TRINITY_DN31594_c0_g1_i21	1
TRINITY_DN15911_c0_g1_i12	1
TRINITY_DN165_c1_g1_i18	1
TRINITY_DN22926_c0_g1_i14	1
TRINITY_DN165_c1_g1_i22	1
TRINITY_DN165_c1_g1_i27	1
TRINITY_DN165_c1_g1_i7	1
TRINITY_DN16653_c0_g1_i7	1
TRINITY_DN2590_c0_g1_i27	1
TRINITY_DN2590_c0_g1_i114	1
TRINITY_DN2590_c0_g1_i51	1
TRINITY_DN14644_c0_g1_i7	1
TRINITY_DN14644_c0_g1_i16	1
TRINITY_DN13581_c0_g1_i18	1
TRINITY_DN32_c2_g1_i5	1
TRINITY_DN2307_c0_g1_i34	1
TRINITY_DN2307_c0_g1_i95	1
TRINITY_DN2307_c0_g1_i117	1
TRINITY_DN2307_c0_g1_i99	1
TRINITY_DN9458_c0_g1_i23	1
TRINITY_DN9458_c0_g1_i29	1
TRINITY_DN239_c0_g1_i19	1
TRINITY_DN1266_c0_g1_i7	1
TRINITY_DN1266_c0_g1_i14	1
TRINITY_DN30450_c0_g1_i1	1
TRINITY_DN4201_c0_g1_i2	1
TRINITY_DN19071_c0_g1_i3	1
TRINITY_DN1266_c3_g1_i1	1
TRINITY_DN16733_c0_g1_i1	1
TRINITY_DN29038_c0_g1_i1	1
TRINITY_DN1427_c0_g1_i5	1
TRINITY_DN1427_c0_g1_i6	1
TRINITY_DN3099_c0_g1_i13	1
TRINITY_DN2224_c1_g1_i5	1
TRINITY_DN5792_c0_g1_i2	1
TRINITY_DN5792_c0_g1_i11	1
TRINITY_DN20796_c0_g1_i1	1
TRINITY_DN18161_c0_g1_i14	1
TRINITY_DN13873_c0_g1_i16	1
TRINITY_DN20507_c0_g1_i19	1
TRINITY_DN105814_c0_g1_i1	1
TRINITY_DN3167_c0_g1_i29	1
TRINITY_DN41_c2_g1_i7	1
TRINITY_DN41_c2_g1_i6	1
TRINITY_DN13647_c0_g1_i30	1
TRINITY_DN3245_c0_g1_i6	1
TRINITY_DN3245_c0_g1_i35	1
TRINITY_DN1028_c0_g1_i9	1
TRINITY_DN1028_c0_g1_i13	1
TRINITY_DN1028_c0_g1_i16	1
TRINITY_DN936_c0_g1_i8	1
TRINITY_DN3216_c0_g1_i14	1
TRINITY_DN3216_c0_g1_i15	1
TRINITY_DN39467_c0_g1_i74	1
TRINITY_DN47851_c0_g1_i7	1
TRINITY_DN47851_c0_g1_i4	1
TRINITY_DN3549_c0_g1_i2	1
TRINITY_DN3549_c0_g1_i58	1
TRINITY_DN3549_c0_g1_i28	1
TRINITY_DN3549_c0_g1_i68	1
TRINITY_DN4031_c0_g1_i13	1
TRINITY_DN1745_c1_g1_i16	1
TRINITY_DN1745_c1_g1_i18	1
TRINITY_DN1745_c1_g1_i10	1
TRINITY_DN1745_c1_g1_i30	1
TRINITY_DN124_c0_g1_i12	1
TRINITY_DN124_c0_g1_i13	1
TRINITY_DN2478_c0_g1_i30	1
TRINITY_DN13595_c0_g1_i2	1
TRINITY_DN124_c1_g1_i6	1
TRINITY_DN1775_c0_g1_i22	1
TRINITY_DN4254_c0_g2_i41	1
TRINITY_DN21094_c0_g1_i4	1
TRINITY_DN22698_c1_g1_i4	1
TRINITY_DN22_c0_g1_i22	1
TRINITY_DN14087_c0_g1_i9	1
TRINITY_DN1740_c0_g1_i3	1
TRINITY_DN608_c1_g1_i37	1
TRINITY_DN608_c1_g1_i13	1
TRINITY_DN3479_c1_g1_i5	1
TRINITY_DN1110_c0_g1_i21	1
TRINITY_DN1110_c0_g1_i12	1
TRINITY_DN114334_c0_g1_i1	1
TRINITY_DN16700_c0_g1_i1	1
TRINITY_DN58403_c0_g1_i1	1
TRINITY_DN123474_c0_g1_i1	1
TRINITY_DN7473_c0_g1_i3	1
TRINITY_DN204_c0_g1_i15	1
TRINITY_DN916_c0_g1_i19	1
TRINITY_DN916_c0_g1_i1	1
TRINITY_DN115220_c0_g1_i1	1
TRINITY_DN64567_c0_g1_i1	1
TRINITY_DN5591_c0_g1_i9	1
TRINITY_DN5591_c0_g1_i5	1
TRINITY_DN69732_c0_g1_i1	1
TRINITY_DN17219_c0_g1_i6	1
TRINITY_DN91176_c0_g1_i1	1
TRINITY_DN542_c0_g1_i16	1
TRINITY_DN18130_c0_g1_i4	1
TRINITY_DN18130_c0_g1_i102	1
TRINITY_DN18130_c0_g1_i112	1
TRINITY_DN5297_c0_g1_i12	1
TRINITY_DN5297_c0_g1_i1	1
TRINITY_DN80267_c0_g1_i1	1
TRINITY_DN2926_c0_g1_i5	1
TRINITY_DN3800_c0_g1_i1	1
TRINITY_DN13065_c0_g2_i2	1
TRINITY_DN10414_c0_g1_i1	1
TRINITY_DN12317_c1_g1_i1	1
TRINITY_DN3546_c0_g1_i10	1
TRINITY_DN16135_c0_g1_i5	1
TRINITY_DN743_c1_g1_i18	1
TRINITY_DN2861_c0_g1_i11	1
TRINITY_DN3546_c0_g1_i7	1
TRINITY_DN743_c1_g1_i6	1
TRINITY_DN9174_c0_g1_i4	1
TRINITY_DN28842_c0_g2_i2	1
TRINITY_DN13583_c0_g1_i3	1
TRINITY_DN207_c0_g1_i16	1
TRINITY_DN21135_c0_g1_i3	1
TRINITY_DN207_c0_g1_i30	1
TRINITY_DN10414_c0_g2_i1	1
TRINITY_DN306_c0_g1_i2	1
TRINITY_DN207_c0_g1_i10	1
TRINITY_DN207_c0_g1_i11	1
TRINITY_DN34542_c0_g1_i4	1
TRINITY_DN10610_c0_g1_i74	1
TRINITY_DN3546_c0_g1_i8	1
TRINITY_DN20527_c0_g1_i18	1
TRINITY_DN40552_c0_g2_i2	1
TRINITY_DN2266_c1_g1_i43	1
TRINITY_DN14737_c0_g1_i4	1
TRINITY_DN207_c0_g1_i15	1
TRINITY_DN743_c1_g1_i16	1
TRINITY_DN34362_c3_g1_i1	1
TRINITY_DN37772_c0_g1_i1	1
TRINITY_DN5574_c0_g1_i10	1
TRINITY_DN20269_c0_g3_i1	1
TRINITY_DN12848_c0_g1_i48	1
TRINITY_DN22651_c0_g1_i10	1
TRINITY_DN37894_c0_g1_i1	1
TRINITY_DN21135_c0_g1_i1	1
TRINITY_DN17170_c0_g1_i14	1
TRINITY_DN7174_c0_g2_i4	1
TRINITY_DN28626_c1_g2_i17	1
TRINITY_DN87843_c0_g1_i1	1
TRINITY_DN574_c1_g1_i22	1
TRINITY_DN9769_c0_g1_i3	1
TRINITY_DN26842_c0_g1_i1	1
TRINITY_DN30336_c0_g1_i18	1
TRINITY_DN30336_c0_g1_i1	1
TRINITY_DN1648_c0_g1_i17	1
TRINITY_DN1559_c0_g1_i20	1
TRINITY_DN1428_c0_g1_i2	1
TRINITY_DN1428_c0_g1_i16	1
TRINITY_DN1428_c0_g1_i11	1
TRINITY_DN1428_c0_g1_i22	1
TRINITY_DN1428_c0_g1_i28	1
TRINITY_DN1428_c0_g1_i9	1
TRINITY_DN1428_c0_g1_i12	1
TRINITY_DN67144_c0_g1_i1	1
TRINITY_DN1901_c0_g1_i16	1
TRINITY_DN21262_c0_g1_i1	1
TRINITY_DN2257_c1_g1_i1	1
TRINITY_DN1612_c0_g1_i8	1
TRINITY_DN3923_c0_g1_i6	1
TRINITY_DN32395_c0_g1_i4	1
TRINITY_DN1653_c0_g1_i43	1
TRINITY_DN146_c2_g1_i11	1
TRINITY_DN136067_c0_g1_i1	1
TRINITY_DN80473_c0_g1_i1	1
TRINITY_DN69188_c0_g1_i1	1
TRINITY_DN2377_c0_g1_i5	1
TRINITY_DN2377_c0_g1_i104	1
TRINITY_DN25596_c0_g1_i1	1
TRINITY_DN46318_c0_g1_i1	1
TRINITY_DN128977_c0_g1_i1	1
TRINITY_DN20336_c0_g1_i13	1
TRINITY_DN13199_c0_g1_i25	1
TRINITY_DN102643_c0_g1_i1	1
TRINITY_DN5591_c0_g1_i6	1
TRINITY_DN23952_c0_g1_i1	1
TRINITY_DN134486_c0_g1_i1	1
TRINITY_DN6895_c0_g1_i3	1
TRINITY_DN1166_c0_g1_i51	1
TRINITY_DN1166_c0_g1_i22	1
TRINITY_DN1237_c0_g1_i88	1
TRINITY_DN3717_c0_g1_i1	1
TRINITY_DN58970_c0_g1_i1	1
TRINITY_DN21733_c0_g1_i1	1
TRINITY_DN27532_c0_g1_i14	1
TRINITY_DN5671_c0_g1_i15	1
TRINITY_DN9363_c0_g1_i1	1
TRINITY_DN165_c1_g1_i24	1
TRINITY_DN5671_c0_g1_i5	1
TRINITY_DN9363_c0_g1_i6	1
TRINITY_DN29612_c0_g1_i1	1
TRINITY_DN165_c1_g1_i13	1
TRINITY_DN165_c1_g1_i14	1
TRINITY_DN165_c1_g1_i33	1
TRINITY_DN2861_c0_g1_i27	1
TRINITY_DN144222_c0_g1_i1	1
TRINITY_DN5671_c0_g1_i21	1
TRINITY_DN10827_c0_g1_i42	1
TRINITY_DN11848_c0_g1_i5	1
TRINITY_DN90224_c0_g1_i1	1
TRINITY_DN7397_c1_g1_i6	1
TRINITY_DN114478_c0_g1_i1	1
TRINITY_DN4580_c0_g1_i1	1
TRINITY_DN5902_c0_g2_i1	1
TRINITY_DN24629_c1_g1_i1	1
TRINITY_DN78775_c0_g1_i1	1
TRINITY_DN105974_c0_g1_i2	1
TRINITY_DN41471_c0_g1_i2	1
TRINITY_DN15313_c1_g2_i1	1
TRINITY_DN29501_c0_g1_i1	1
TRINITY_DN25280_c0_g3_i13	1
TRINITY_DN126740_c0_g1_i1	1
TRINITY_DN80345_c0_g1_i1	1
TRINITY_DN61685_c0_g1_i1	1
TRINITY_DN136785_c0_g1_i1	1
TRINITY_DN37904_c0_g1_i1	1
TRINITY_DN2914_c0_g1_i2	1
TRINITY_DN2914_c0_g1_i6	1
TRINITY_DN133581_c0_g1_i1	1
TRINITY_DN63328_c0_g1_i1	1
TRINITY_DN125063_c0_g1_i1	1
TRINITY_DN120600_c0_g1_i1	1
TRINITY_DN58265_c0_g1_i1	1
TRINITY_DN100107_c0_g1_i1	1
TRINITY_DN41614_c0_g1_i1	1
TRINITY_DN57714_c0_g1_i1	1
TRINITY_DN61443_c0_g1_i1	1
TRINITY_DN5185_c0_g1_i8	1
TRINITY_DN2782_c0_g1_i29	1
TRINITY_DN2900_c0_g1_i4	1
TRINITY_DN17051_c1_g1_i31	1
TRINITY_DN17051_c1_g1_i8	1
TRINITY_DN15404_c0_g1_i2	1
TRINITY_DN5234_c0_g1_i9	1
TRINITY_DN22688_c0_g1_i35	1
TRINITY_DN6397_c1_g1_i13	1
TRINITY_DN19035_c0_g1_i4	1
TRINITY_DN19035_c0_g1_i3	1
TRINITY_DN45648_c0_g1_i6	1
TRINITY_DN11403_c0_g1_i10	1
TRINITY_DN487_c0_g1_i13	1
TRINITY_DN18772_c0_g1_i5	1
TRINITY_DN12095_c0_g3_i1	1
TRINITY_DN487_c0_g1_i11	1
TRINITY_DN579_c0_g1_i17	1
TRINITY_DN967_c2_g1_i6	1
TRINITY_DN487_c0_g1_i32	1
TRINITY_DN13625_c0_g1_i2	1
TRINITY_DN5873_c0_g1_i10	1
TRINITY_DN8043_c2_g1_i3	1
TRINITY_DN5873_c0_g1_i9	1
TRINITY_DN13251_c0_g1_i2	1
TRINITY_DN851_c1_g1_i2	1
TRINITY_DN14144_c0_g1_i1	1
TRINITY_DN945_c1_g1_i1	1
TRINITY_DN2455_c0_g1_i2	1
TRINITY_DN22446_c0_g1_i3	1
TRINITY_DN13251_c0_g1_i12	1
TRINITY_DN3204_c2_g1_i1	1
TRINITY_DN14144_c0_g1_i12	1
TRINITY_DN8043_c2_g1_i8	1
TRINITY_DN585_c0_g1_i7	1
TRINITY_DN21820_c0_g1_i11	1
TRINITY_DN27648_c0_g1_i2	1
TRINITY_DN31383_c0_g1_i12	1
TRINITY_DN7025_c0_g1_i10	1
TRINITY_DN31383_c0_g1_i3	1
TRINITY_DN15027_c0_g1_i12	1
TRINITY_DN119387_c0_g1_i1	1
TRINITY_DN65694_c0_g1_i1	1
TRINITY_DN110342_c0_g1_i1	1
TRINITY_DN104684_c0_g1_i1	1
TRINITY_DN10682_c0_g1_i1	1
TRINITY_DN27416_c1_g1_i3	1
TRINITY_DN108284_c0_g1_i1	1
TRINITY_DN9384_c0_g1_i26	1
TRINITY_DN20290_c0_g1_i35	1
TRINITY_DN168_c2_g1_i1	1
TRINITY_DN11818_c0_g1_i6	1
TRINITY_DN20290_c0_g1_i16	1
TRINITY_DN9384_c0_g1_i27	1
TRINITY_DN20290_c0_g1_i2	1
TRINITY_DN18899_c0_g1_i15	1
TRINITY_DN11818_c0_g1_i3	1
TRINITY_DN84725_c0_g1_i1	1
TRINITY_DN4706_c0_g1_i5	1
TRINITY_DN146984_c0_g1_i1	1
TRINITY_DN37533_c0_g1_i1	1
TRINITY_DN36063_c0_g1_i9	1
TRINITY_DN57625_c0_g1_i1	1
TRINITY_DN58065_c0_g1_i1	1
TRINITY_DN36063_c0_g1_i3	1
TRINITY_DN4790_c1_g1_i2	1
TRINITY_DN4790_c1_g1_i3	1
TRINITY_DN759_c0_g1_i15	1
TRINITY_DN114669_c0_g1_i1	1
TRINITY_DN23188_c0_g1_i17	1
TRINITY_DN521_c0_g1_i9	1
TRINITY_DN6031_c0_g1_i3	1
TRINITY_DN26516_c0_g1_i8	1
TRINITY_DN23345_c0_g1_i1	1
TRINITY_DN26516_c0_g1_i7	1
TRINITY_DN6031_c0_g1_i1	1
TRINITY_DN1445_c0_g1_i23	1
TRINITY_DN28045_c0_g1_i5	1
TRINITY_DN411_c0_g1_i7	1
TRINITY_DN411_c0_g1_i9	1
TRINITY_DN411_c0_g1_i18	1
TRINITY_DN411_c0_g1_i6	1
TRINITY_DN411_c0_g1_i21	1
TRINITY_DN5665_c0_g1_i22	1
TRINITY_DN43065_c0_g1_i4	1
TRINITY_DN1453_c0_g1_i78	1
TRINITY_DN43065_c0_g1_i2	1
TRINITY_DN2396_c0_g1_i4	1
TRINITY_DN2396_c0_g1_i1	1
TRINITY_DN2396_c0_g1_i30	1
TRINITY_DN60659_c0_g1_i1	1
TRINITY_DN11964_c0_g1_i8	1
TRINITY_DN11964_c0_g1_i9	1
TRINITY_DN36063_c0_g1_i1	1
TRINITY_DN11964_c0_g1_i2	1
TRINITY_DN36063_c0_g1_i8	1
TRINITY_DN36063_c0_g1_i2	1
TRINITY_DN11964_c0_g1_i1	1
TRINITY_DN11964_c1_g1_i1	1
TRINITY_DN11964_c1_g2_i8	1
TRINITY_DN11964_c1_g2_i7	1
TRINITY_DN36063_c0_g1_i7	1
TRINITY_DN11964_c0_g1_i7	1
TRINITY_DN11964_c0_g1_i3	1
TRINITY_DN11964_c0_g1_i13	1
TRINITY_DN74438_c0_g1_i1	1
TRINITY_DN23188_c0_g1_i14	1
TRINITY_DN123541_c0_g1_i1	1
TRINITY_DN646_c1_g1_i5	1
TRINITY_DN646_c1_g1_i7	1
TRINITY_DN123759_c0_g1_i1	1
TRINITY_DN5134_c0_g1_i1	1
TRINITY_DN2462_c0_g1_i2	1
TRINITY_DN110866_c0_g1_i1	1
TRINITY_DN134529_c0_g1_i1	1
TRINITY_DN15888_c0_g1_i52	1
TRINITY_DN6031_c0_g1_i2	1
TRINITY_DN142655_c0_g1_i1	1
TRINITY_DN16036_c1_g1_i1	1
TRINITY_DN35698_c1_g1_i1	1
TRINITY_DN1762_c0_g1_i41	1
TRINITY_DN1762_c0_g1_i66	1
TRINITY_DN1762_c0_g1_i21	1
TRINITY_DN14954_c0_g2_i2	1
TRINITY_DN5984_c1_g1_i1	1
TRINITY_DN47419_c0_g1_i10	1
TRINITY_DN41912_c0_g1_i5	1
TRINITY_DN37077_c0_g2_i4	1
TRINITY_DN9786_c0_g1_i1	1
TRINITY_DN9786_c0_g1_i4	1
TRINITY_DN146602_c0_g1_i1	1
TRINITY_DN90411_c0_g1_i1	1
TRINITY_DN92520_c0_g1_i1	1
TRINITY_DN32104_c0_g1_i3	1
TRINITY_DN32104_c0_g1_i2	1
TRINITY_DN69429_c0_g1_i1	1
TRINITY_DN109891_c0_g1_i1	1
TRINITY_DN80810_c0_g1_i1	1
TRINITY_DN4511_c0_g1_i12	1
TRINITY_DN4511_c0_g1_i16	1
TRINITY_DN66346_c0_g1_i1	1
TRINITY_DN84445_c0_g1_i1	1
TRINITY_DN1733_c5_g1_i13	1
TRINITY_DN5707_c0_g1_i15	1
TRINITY_DN120462_c0_g1_i1	1
TRINITY_DN188_c1_g3_i1	1
TRINITY_DN188_c1_g2_i2	1
TRINITY_DN9727_c0_g1_i1	1
TRINITY_DN9727_c0_g1_i2	1
TRINITY_DN121153_c0_g1_i1	1
TRINITY_DN48717_c0_g2_i1	1
TRINITY_DN119595_c0_g1_i1	1
TRINITY_DN133062_c0_g1_i1	1
TRINITY_DN83766_c0_g1_i1	1
TRINITY_DN134082_c0_g1_i1	1
TRINITY_DN53303_c0_g1_i1	1
TRINITY_DN136182_c0_g1_i1	1
TRINITY_DN60607_c0_g1_i1	1
TRINITY_DN34366_c0_g1_i1	1
TRINITY_DN85022_c0_g1_i1	1
TRINITY_DN6295_c0_g1_i47	1
TRINITY_DN18547_c0_g1_i3	1
TRINITY_DN6295_c0_g1_i19	1
TRINITY_DN122972_c0_g1_i1	1
TRINITY_DN14813_c1_g1_i1	1
TRINITY_DN14813_c1_g1_i2	1
TRINITY_DN130496_c0_g1_i1	1
TRINITY_DN118820_c0_g1_i1	1
TRINITY_DN12611_c0_g1_i16	1
TRINITY_DN3385_c0_g1_i28	1
TRINITY_DN96058_c0_g1_i1	1
TRINITY_DN109197_c0_g1_i1	1
TRINITY_DN6235_c0_g1_i1	1
TRINITY_DN17337_c0_g1_i3	1
TRINITY_DN45779_c1_g1_i1	1
TRINITY_DN1361_c0_g1_i13	1
TRINITY_DN1361_c0_g1_i8	1
TRINITY_DN5320_c0_g1_i1	1
TRINITY_DN94_c0_g1_i45	1
TRINITY_DN94_c0_g1_i6	1
TRINITY_DN94_c0_g1_i18	1
TRINITY_DN94_c0_g1_i79	1
TRINITY_DN1517_c0_g1_i14	1
TRINITY_DN1517_c0_g1_i11	1
TRINITY_DN31712_c0_g2_i2	1
TRINITY_DN2959_c0_g1_i1	1
TRINITY_DN2_c15_g1_i9	1
TRINITY_DN2959_c0_g1_i31	1
TRINITY_DN2959_c0_g1_i42	1
TRINITY_DN2588_c0_g1_i71	1
TRINITY_DN2568_c0_g1_i26	1
TRINITY_DN2568_c0_g1_i10	1
TRINITY_DN11_c0_g1_i27	1
TRINITY_DN797_c1_g1_i4	1
TRINITY_DN219_c0_g1_i230	1
TRINITY_DN219_c0_g1_i168	1
TRINITY_DN6012_c0_g2_i1	1
TRINITY_DN219_c0_g1_i156	1
TRINITY_DN219_c0_g1_i189	1
TRINITY_DN219_c0_g2_i1	1
TRINITY_DN219_c0_g1_i315	1
TRINITY_DN27922_c0_g1_i13	1
TRINITY_DN6174_c1_g1_i5	1
TRINITY_DN6174_c1_g1_i2	1
TRINITY_DN32813_c0_g1_i11	1
TRINITY_DN129_c0_g1_i31	1
TRINITY_DN16778_c0_g1_i1	1
TRINITY_DN33616_c0_g1_i15	1
TRINITY_DN30508_c0_g1_i2	1
TRINITY_DN4916_c0_g1_i7	1
TRINITY_DN4916_c0_g1_i2	1
TRINITY_DN4916_c0_g1_i9	1
TRINITY_DN2064_c1_g1_i29	1
TRINITY_DN39725_c0_g1_i2	1
TRINITY_DN4916_c0_g1_i14	1
TRINITY_DN4916_c0_g1_i11	1
TRINITY_DN4916_c0_g1_i20	1
TRINITY_DN2064_c1_g1_i34	1
TRINITY_DN3445_c0_g1_i9	1
TRINITY_DN25970_c0_g1_i2	1
TRINITY_DN2064_c1_g1_i23	1
TRINITY_DN21760_c0_g1_i6	1
TRINITY_DN18092_c0_g1_i20	1
TRINITY_DN10864_c0_g1_i1	1
TRINITY_DN15110_c1_g1_i5	1
TRINITY_DN7852_c0_g1_i7	1
TRINITY_DN38379_c0_g1_i1	1
TRINITY_DN53277_c0_g1_i2	1
TRINITY_DN15258_c0_g1_i23	1
TRINITY_DN29118_c0_g1_i2	1
TRINITY_DN28509_c0_g3_i1	1
TRINITY_DN3986_c0_g1_i4	1
TRINITY_DN106_c0_g1_i102	1
TRINITY_DN106_c0_g1_i46	1
TRINITY_DN106_c0_g1_i86	1
TRINITY_DN6629_c0_g1_i38	1
TRINITY_DN18300_c0_g1_i4	1
TRINITY_DN18300_c0_g1_i6	1
TRINITY_DN449_c0_g1_i53	1
TRINITY_DN449_c0_g1_i49	1
TRINITY_DN35333_c0_g1_i2	1
TRINITY_DN28782_c0_g1_i3	1
TRINITY_DN24571_c0_g1_i1	1
TRINITY_DN75252_c0_g1_i1	1
TRINITY_DN65_c4_g1_i2	1
TRINITY_DN27802_c0_g1_i7	1
TRINITY_DN25938_c0_g1_i16	1
TRINITY_DN26666_c0_g1_i14	1
TRINITY_DN10834_c0_g1_i1	1
TRINITY_DN18782_c0_g1_i1	1
TRINITY_DN20855_c0_g1_i22	1
TRINITY_DN604_c1_g1_i10	1
TRINITY_DN12893_c0_g1_i13	1
TRINITY_DN2152_c0_g1_i86	1
TRINITY_DN162_c0_g1_i67	1
TRINITY_DN162_c0_g1_i18	1
TRINITY_DN162_c0_g1_i4	1
TRINITY_DN3633_c0_g1_i1	1
TRINITY_DN2611_c0_g1_i5	1
TRINITY_DN71241_c0_g1_i1	1
TRINITY_DN15027_c0_g1_i6	1
TRINITY_DN15027_c0_g1_i10	1
TRINITY_DN2747_c0_g1_i111	1
TRINITY_DN10736_c1_g1_i12	1
TRINITY_DN1996_c0_g1_i7	1
TRINITY_DN1674_c0_g1_i25	1
TRINITY_DN5089_c0_g1_i11	1
TRINITY_DN13614_c0_g1_i4	1
TRINITY_DN6982_c0_g1_i6	1
TRINITY_DN12570_c0_g1_i17	1
TRINITY_DN12570_c0_g1_i16	1
TRINITY_DN12570_c0_g1_i14	1
TRINITY_DN3849_c0_g1_i64	1
TRINITY_DN3660_c0_g1_i3	1
TRINITY_DN3660_c0_g1_i7	1
TRINITY_DN51624_c0_g1_i9	1
TRINITY_DN51624_c0_g1_i12	1
TRINITY_DN15935_c1_g1_i3	1
TRINITY_DN15935_c1_g1_i7	1
TRINITY_DN228_c1_g1_i9	1
TRINITY_DN15935_c1_g1_i4	1
TRINITY_DN16243_c0_g1_i2	1
TRINITY_DN2747_c0_g1_i138	1
TRINITY_DN4099_c0_g1_i8	1
TRINITY_DN2495_c0_g1_i129	1
TRINITY_DN2495_c0_g1_i84	1
TRINITY_DN4102_c0_g1_i22	1
TRINITY_DN41854_c0_g1_i18	1
TRINITY_DN5442_c0_g1_i109	1
TRINITY_DN2747_c0_g1_i143	1
TRINITY_DN6369_c0_g1_i6	1
TRINITY_DN5623_c0_g1_i32	1
TRINITY_DN2445_c0_g1_i11	1
TRINITY_DN2445_c0_g1_i14	1
TRINITY_DN1130_c0_g1_i4	1
TRINITY_DN5388_c0_g1_i12	1
TRINITY_DN5388_c0_g1_i10	1
TRINITY_DN7648_c0_g1_i11	1
TRINITY_DN26837_c1_g1_i5	1
TRINITY_DN40_c0_g1_i130	1
TRINITY_DN9016_c0_g1_i1	1
TRINITY_DN6884_c0_g1_i29	1
TRINITY_DN6884_c0_g1_i10	1
TRINITY_DN6884_c0_g1_i17	1
TRINITY_DN12568_c0_g1_i14	1
TRINITY_DN5056_c0_g1_i4	1
TRINITY_DN5056_c0_g1_i5	1
TRINITY_DN9416_c0_g1_i2	1
TRINITY_DN131_c1_g1_i85	1
TRINITY_DN131_c1_g1_i44	1
TRINITY_DN131_c1_g1_i37	1
TRINITY_DN7639_c0_g1_i120	1
TRINITY_DN1632_c0_g1_i24	1
TRINITY_DN1632_c0_g1_i392	1
TRINITY_DN1632_c0_g1_i126	1
TRINITY_DN1632_c0_g1_i123	1
TRINITY_DN14340_c0_g1_i2	1
TRINITY_DN561_c1_g1_i185	1
TRINITY_DN561_c1_g1_i142	1
TRINITY_DN561_c1_g1_i26	1
TRINITY_DN133123_c0_g1_i1	1
TRINITY_DN1446_c0_g1_i9	1
TRINITY_DN2112_c0_g1_i41	1
TRINITY_DN2112_c0_g1_i11	1
TRINITY_DN2112_c0_g1_i29	1
TRINITY_DN1013_c0_g1_i4	1
TRINITY_DN1013_c0_g1_i5	1
TRINITY_DN1386_c0_g1_i85	1
TRINITY_DN4150_c0_g1_i9	1
TRINITY_DN3274_c0_g1_i15	1
TRINITY_DN3274_c0_g1_i6	1
TRINITY_DN547_c0_g1_i40	1
TRINITY_DN547_c0_g1_i23	1
TRINITY_DN2713_c0_g1_i7	1
TRINITY_DN1006_c0_g1_i54	1
TRINITY_DN2398_c0_g1_i3	1
TRINITY_DN5186_c0_g1_i10	1
TRINITY_DN31253_c0_g1_i2	1
TRINITY_DN22104_c0_g2_i1	1
TRINITY_DN26026_c0_g1_i5	1
TRINITY_DN1548_c0_g1_i7	1
TRINITY_DN4866_c0_g1_i20	1
TRINITY_DN19804_c0_g1_i2	1
TRINITY_DN2151_c0_g1_i12	1
TRINITY_DN4866_c0_g1_i5	1
TRINITY_DN83764_c0_g1_i1	1
TRINITY_DN18358_c0_g1_i7	1
TRINITY_DN2080_c0_g1_i6	1
TRINITY_DN9058_c0_g1_i14	1
TRINITY_DN9058_c0_g1_i10	1
TRINITY_DN9058_c0_g1_i17	1
TRINITY_DN8253_c0_g1_i12	1
TRINITY_DN8253_c0_g1_i3	1
TRINITY_DN8253_c0_g1_i11	1
TRINITY_DN9058_c0_g1_i3	1
TRINITY_DN37499_c0_g2_i2	1
TRINITY_DN478_c1_g1_i6	1
TRINITY_DN1127_c0_g1_i3	1
TRINITY_DN1127_c0_g1_i177	1
TRINITY_DN1127_c0_g1_i130	1
TRINITY_DN21860_c0_g1_i12	1
TRINITY_DN2157_c0_g2_i7	1
TRINITY_DN2727_c0_g1_i11	1
TRINITY_DN2727_c0_g1_i7	1
TRINITY_DN2727_c0_g1_i5	1
TRINITY_DN7868_c1_g1_i23	1
TRINITY_DN4610_c0_g1_i86	1
TRINITY_DN4610_c0_g1_i9	1
TRINITY_DN3871_c0_g1_i69	1
TRINITY_DN3871_c0_g1_i27	1
TRINITY_DN105329_c0_g1_i1	1
TRINITY_DN17879_c0_g1_i5	1
TRINITY_DN2023_c0_g1_i68	1
TRINITY_DN2023_c0_g1_i70	1
TRINITY_DN17629_c0_g1_i2	1
TRINITY_DN8153_c0_g1_i5	1
TRINITY_DN8153_c0_g1_i1	1
TRINITY_DN1567_c0_g1_i3	1
TRINITY_DN1119_c0_g1_i107	1
TRINITY_DN1119_c0_g1_i28	1
TRINITY_DN1119_c0_g1_i55	1
TRINITY_DN1119_c0_g1_i89	1
TRINITY_DN1119_c0_g1_i100	1
TRINITY_DN1429_c0_g1_i122	1
TRINITY_DN1429_c0_g1_i99	1
TRINITY_DN1429_c0_g1_i89	1
TRINITY_DN699_c0_g1_i15	1
TRINITY_DN699_c0_g1_i13	1
TRINITY_DN594_c0_g1_i24	1
TRINITY_DN20198_c0_g1_i2	1
TRINITY_DN594_c0_g1_i22	1
TRINITY_DN11028_c0_g1_i1	1
TRINITY_DN92_c0_g1_i2	1
TRINITY_DN92_c0_g1_i24	1
TRINITY_DN92_c3_g1_i1	1
TRINITY_DN3542_c0_g2_i2	1
TRINITY_DN31646_c0_g2_i5	1
TRINITY_DN10927_c0_g1_i10	1
TRINITY_DN11192_c0_g1_i1	1
TRINITY_DN8843_c0_g1_i9	1
TRINITY_DN9205_c0_g1_i7	1
TRINITY_DN9205_c0_g1_i12	1
TRINITY_DN9205_c0_g1_i10	1
TRINITY_DN9205_c0_g1_i13	1
TRINITY_DN9205_c0_g1_i17	1
TRINITY_DN13497_c0_g1_i10	1
TRINITY_DN72675_c0_g1_i1	1
TRINITY_DN27045_c0_g1_i4	1
TRINITY_DN6_c0_g1_i26	1
TRINITY_DN27045_c0_g1_i1	1
TRINITY_DN6_c0_g1_i11	1
TRINITY_DN2692_c0_g1_i1	1
TRINITY_DN383_c0_g1_i156	1
TRINITY_DN383_c0_g1_i23	1
TRINITY_DN383_c0_g1_i18	1
TRINITY_DN383_c0_g1_i25	1
TRINITY_DN583_c0_g1_i9	1
TRINITY_DN583_c0_g1_i35	1
TRINITY_DN7541_c0_g1_i9	1
TRINITY_DN708_c0_g1_i3	1
TRINITY_DN5501_c0_g1_i15	1
TRINITY_DN59118_c0_g1_i1	1
TRINITY_DN15997_c0_g1_i2	1
TRINITY_DN34830_c1_g1_i6	1
TRINITY_DN40893_c0_g1_i12	1
TRINITY_DN19485_c0_g1_i5	1
TRINITY_DN3821_c0_g1_i13	1
TRINITY_DN2040_c0_g1_i5	1
TRINITY_DN2040_c0_g1_i1	1
TRINITY_DN4173_c0_g1_i12	1
TRINITY_DN4173_c0_g1_i1	1
TRINITY_DN13_c5_g1_i2	1
TRINITY_DN13_c5_g1_i18	1
TRINITY_DN3240_c0_g1_i8	1
TRINITY_DN3240_c0_g1_i1	1
TRINITY_DN4906_c0_g1_i4	1
TRINITY_DN1311_c0_g1_i9	1
TRINITY_DN867_c0_g1_i38	1
TRINITY_DN867_c0_g1_i27	1
TRINITY_DN20171_c0_g1_i98	1
TRINITY_DN20171_c0_g1_i1	1
TRINITY_DN20171_c0_g1_i13	1
TRINITY_DN34552_c0_g1_i2	1
TRINITY_DN31102_c0_g1_i15	1
TRINITY_DN234_c18_g1_i2	1
TRINITY_DN130885_c0_g1_i1	1
TRINITY_DN4616_c0_g1_i30	1
TRINITY_DN3976_c0_g1_i56	1
TRINITY_DN1954_c0_g1_i16	1
TRINITY_DN131438_c0_g1_i1	1
TRINITY_DN1954_c0_g1_i13	1
TRINITY_DN27949_c0_g1_i13	1
TRINITY_DN19025_c0_g1_i11	1
TRINITY_DN19025_c0_g1_i15	1
TRINITY_DN11823_c0_g1_i2	1
TRINITY_DN6082_c0_g1_i11	1
TRINITY_DN9365_c0_g1_i5	1
TRINITY_DN53_c0_g1_i3	1
TRINITY_DN53_c0_g1_i12	1
TRINITY_DN53_c0_g1_i18	1
TRINITY_DN53_c0_g1_i16	1
TRINITY_DN23943_c0_g1_i1	1
TRINITY_DN35388_c0_g1_i1	1
TRINITY_DN1711_c0_g1_i3	1
TRINITY_DN5088_c0_g1_i5	1
TRINITY_DN10205_c0_g1_i13	1
TRINITY_DN42598_c0_g1_i2	1
TRINITY_DN42598_c0_g1_i1	1
TRINITY_DN28759_c0_g1_i1	1
TRINITY_DN9448_c0_g1_i9	1
TRINITY_DN20444_c0_g1_i6	1
TRINITY_DN15876_c1_g1_i5	1
TRINITY_DN1374_c0_g1_i5	1
TRINITY_DN15522_c0_g1_i2	1
TRINITY_DN23000_c0_g1_i3	1
TRINITY_DN55825_c0_g1_i18	1
TRINITY_DN4764_c0_g1_i20	1
TRINITY_DN4764_c0_g1_i21	1
TRINITY_DN12169_c0_g1_i19	1
TRINITY_DN2860_c0_g1_i3	1
TRINITY_DN2860_c0_g1_i6	1
TRINITY_DN19538_c1_g1_i4	1
TRINITY_DN22798_c0_g1_i1	1
TRINITY_DN3224_c0_g1_i34	1
TRINITY_DN1293_c2_g1_i2	1
TRINITY_DN1967_c0_g1_i19	1
TRINITY_DN1293_c2_g1_i5	1
TRINITY_DN19538_c1_g1_i2	1
TRINITY_DN21681_c0_g1_i20	1
TRINITY_DN3224_c0_g1_i39	1
TRINITY_DN15991_c0_g1_i10	1
TRINITY_DN19538_c0_g1_i1	1
TRINITY_DN73_c3_g1_i8	1
TRINITY_DN15991_c0_g1_i5	1
TRINITY_DN243_c8_g1_i22	1
TRINITY_DN10927_c0_g1_i6	1
TRINITY_DN11278_c0_g1_i11	1
TRINITY_DN98309_c0_g1_i1	1
TRINITY_DN1528_c0_g1_i54	1
TRINITY_DN1451_c0_g1_i10	1
TRINITY_DN1451_c0_g1_i14	1
TRINITY_DN19692_c0_g1_i8	1
TRINITY_DN1528_c0_g1_i51	1
TRINITY_DN8390_c0_g1_i5	1
TRINITY_DN19692_c0_g1_i4	1
TRINITY_DN19692_c0_g1_i7	1
TRINITY_DN7506_c0_g1_i17	1
TRINITY_DN1103_c0_g1_i44	1
TRINITY_DN414_c0_g1_i40	1
TRINITY_DN414_c0_g1_i5	1
TRINITY_DN414_c0_g1_i3	1
TRINITY_DN42672_c0_g1_i4	1
TRINITY_DN42672_c0_g1_i2	1
TRINITY_DN113_c4_g1_i3	1
TRINITY_DN18454_c0_g1_i1	1
TRINITY_DN117001_c0_g1_i1	1
TRINITY_DN1433_c0_g1_i25	1
TRINITY_DN1433_c0_g1_i18	1
TRINITY_DN4103_c0_g1_i3	1
TRINITY_DN20826_c0_g1_i7	1
TRINITY_DN847_c0_g1_i179	1
TRINITY_DN847_c0_g1_i205	1
TRINITY_DN847_c0_g1_i156	1
TRINITY_DN847_c0_g1_i39	1
TRINITY_DN847_c0_g1_i184	1
TRINITY_DN847_c0_g1_i141	1
TRINITY_DN847_c0_g1_i38	1
TRINITY_DN5559_c0_g1_i1	1
TRINITY_DN1963_c1_g1_i27	1
TRINITY_DN2364_c0_g1_i7	1
TRINITY_DN24027_c0_g1_i1	1
TRINITY_DN24027_c0_g1_i2	1
TRINITY_DN65029_c0_g1_i1	1
TRINITY_DN2417_c1_g1_i7	1
TRINITY_DN2417_c1_g1_i4	1
TRINITY_DN55314_c0_g1_i1	1
TRINITY_DN65861_c0_g1_i1	1
TRINITY_DN8999_c0_g2_i2	1
TRINITY_DN8999_c0_g2_i3	1
TRINITY_DN6950_c0_g1_i14	1
TRINITY_DN1924_c0_g1_i6	1
TRINITY_DN1924_c0_g1_i14	1
TRINITY_DN33155_c0_g1_i6	1
TRINITY_DN7524_c0_g1_i7	1
TRINITY_DN4362_c0_g1_i1	1
TRINITY_DN3464_c0_g1_i5	1
TRINITY_DN3464_c0_g1_i3	1
TRINITY_DN4520_c0_g1_i107	1
TRINITY_DN4520_c0_g1_i3	1
TRINITY_DN6805_c0_g1_i41	1
TRINITY_DN6782_c0_g1_i11	1
TRINITY_DN20476_c0_g1_i1	1
TRINITY_DN27793_c0_g1_i2	1
TRINITY_DN23454_c0_g1_i14	1
TRINITY_DN15025_c0_g1_i1	1
TRINITY_DN15567_c0_g3_i6	1
TRINITY_DN26863_c0_g1_i3	1
TRINITY_DN23454_c0_g1_i13	1
TRINITY_DN15567_c0_g3_i5	1
TRINITY_DN26863_c0_g1_i8	1
TRINITY_DN16587_c0_g1_i2	1
TRINITY_DN27793_c0_g1_i3	1
TRINITY_DN26863_c0_g1_i1	1
TRINITY_DN15567_c0_g3_i7	1
TRINITY_DN12857_c0_g1_i3	1
TRINITY_DN891_c1_g1_i28	1
TRINITY_DN22911_c0_g1_i7	1
TRINITY_DN891_c1_g1_i42	1
TRINITY_DN10388_c0_g1_i1	1
TRINITY_DN891_c1_g1_i13	1
TRINITY_DN22911_c0_g1_i8	1
TRINITY_DN10388_c0_g1_i15	1
TRINITY_DN1324_c0_g1_i24	1
TRINITY_DN1324_c0_g1_i50	1
TRINITY_DN1670_c1_g1_i16	1
TRINITY_DN2915_c1_g1_i4	1
TRINITY_DN8291_c0_g1_i1	1
TRINITY_DN3724_c0_g1_i1	1
TRINITY_DN9383_c0_g1_i7	1
TRINITY_DN34375_c1_g1_i2	1
TRINITY_DN7214_c0_g1_i104	1
TRINITY_DN16253_c0_g1_i27	1
TRINITY_DN16253_c0_g1_i28	1
TRINITY_DN16253_c0_g1_i75	1
TRINITY_DN3739_c1_g1_i35	1
TRINITY_DN3739_c1_g1_i9	1
TRINITY_DN2915_c0_g1_i72	1
TRINITY_DN3789_c0_g1_i7	1
TRINITY_DN23809_c0_g1_i3	1
TRINITY_DN53561_c0_g1_i4	1
TRINITY_DN22144_c0_g1_i2	1
TRINITY_DN3649_c0_g1_i3	1
TRINITY_DN2283_c0_g1_i11	1
TRINITY_DN2283_c0_g1_i10	1
TRINITY_DN14971_c0_g1_i13	1
TRINITY_DN2884_c0_g1_i94	1
TRINITY_DN6384_c1_g1_i11	1
TRINITY_DN19452_c2_g1_i2	1
TRINITY_DN5141_c0_g1_i10	1
TRINITY_DN25498_c0_g1_i18	1
TRINITY_DN5141_c0_g1_i7	1
TRINITY_DN739_c0_g1_i6	1
TRINITY_DN9489_c0_g1_i23	1
TRINITY_DN7717_c0_g1_i3	1
TRINITY_DN9383_c0_g1_i2	1
TRINITY_DN5013_c0_g1_i3	1
TRINITY_DN5013_c0_g1_i4	1
TRINITY_DN35612_c0_g1_i3	1
TRINITY_DN11307_c0_g1_i25	1
TRINITY_DN459_c0_g2_i5	1
TRINITY_DN1372_c0_g1_i5	1
TRINITY_DN18047_c1_g1_i4	1
TRINITY_DN31453_c0_g1_i1	1
TRINITY_DN24884_c0_g1_i1	1
TRINITY_DN18047_c1_g1_i3	1
TRINITY_DN516_c1_g1_i1	1
TRINITY_DN26032_c0_g1_i9	1
TRINITY_DN1372_c3_g1_i12	1
TRINITY_DN40092_c0_g1_i4	1
TRINITY_DN33904_c0_g1_i2	1
TRINITY_DN52712_c1_g1_i1	1
TRINITY_DN26032_c0_g1_i8	1
TRINITY_DN23980_c0_g1_i2	1
TRINITY_DN23980_c0_g1_i7	1
TRINITY_DN33904_c0_g1_i1	1
TRINITY_DN17089_c0_g1_i27	1
TRINITY_DN18801_c3_g1_i1	1
TRINITY_DN32846_c0_g1_i1	1
TRINITY_DN121939_c0_g1_i1	1
TRINITY_DN32670_c0_g1_i2	1
TRINITY_DN1048_c0_g1_i1	1
TRINITY_DN1048_c0_g1_i19	1
TRINITY_DN1676_c0_g1_i40	1
TRINITY_DN3505_c0_g1_i1	1
TRINITY_DN2669_c0_g1_i227	1
TRINITY_DN2669_c0_g1_i168	1
TRINITY_DN2669_c0_g1_i223	1
TRINITY_DN4058_c1_g1_i100	1
TRINITY_DN4058_c1_g1_i31	1
TRINITY_DN31551_c0_g1_i6	1
TRINITY_DN3836_c0_g1_i16	1
TRINITY_DN488_c0_g1_i11	1
TRINITY_DN2690_c0_g1_i60	1
TRINITY_DN8337_c0_g1_i14	1
TRINITY_DN155_c0_g1_i62	1
TRINITY_DN155_c0_g1_i13	1
TRINITY_DN3358_c0_g1_i1	1
TRINITY_DN16897_c0_g1_i1	1
TRINITY_DN16897_c1_g1_i3	1
TRINITY_DN35779_c1_g1_i3	1
TRINITY_DN3412_c0_g1_i21	1
TRINITY_DN3412_c0_g1_i25	1
TRINITY_DN3412_c0_g1_i27	1
TRINITY_DN9819_c0_g1_i2	1
TRINITY_DN16897_c0_g1_i10	1
TRINITY_DN16897_c0_g1_i3	1
TRINITY_DN1372_c3_g1_i10	1
TRINITY_DN1372_c3_g1_i3	1
TRINITY_DN3016_c0_g1_i14	1
TRINITY_DN467_c0_g1_i28	1
TRINITY_DN467_c0_g1_i19	1
TRINITY_DN467_c0_g1_i23	1
TRINITY_DN16958_c0_g1_i2	1
TRINITY_DN461_c0_g1_i1	1
TRINITY_DN844_c0_g1_i2	1
TRINITY_DN844_c0_g1_i1	1
TRINITY_DN844_c0_g1_i10	1
TRINITY_DN7619_c0_g1_i18	1
TRINITY_DN8337_c0_g1_i16	1
TRINITY_DN3829_c0_g1_i10	1
TRINITY_DN3829_c0_g1_i15	1
TRINITY_DN1232_c0_g1_i1	1
TRINITY_DN1232_c0_g1_i4	1
TRINITY_DN14971_c0_g1_i1	1
TRINITY_DN1994_c1_g1_i1	1
TRINITY_DN1994_c1_g1_i8	1
TRINITY_DN1994_c1_g1_i7	1
TRINITY_DN1994_c1_g1_i6	1
TRINITY_DN11494_c2_g1_i4	1
TRINITY_DN7209_c1_g1_i1	1
TRINITY_DN330_c0_g1_i5	1
TRINITY_DN330_c0_g1_i3	1
TRINITY_DN22895_c0_g1_i5	1
TRINITY_DN10839_c0_g1_i6	1
TRINITY_DN6184_c0_g1_i2	1
TRINITY_DN9625_c0_g1_i14	1
TRINITY_DN134340_c0_g1_i1	1
TRINITY_DN19132_c0_g1_i1	1
TRINITY_DN8039_c0_g1_i4	1
TRINITY_DN8039_c0_g1_i6	1
TRINITY_DN43212_c0_g1_i42	1
TRINITY_DN6549_c0_g1_i6	1
TRINITY_DN4228_c0_g1_i3	1
TRINITY_DN4228_c0_g1_i2	1
TRINITY_DN666_c0_g1_i5	1
TRINITY_DN666_c0_g1_i7	1
TRINITY_DN666_c0_g1_i6	1
TRINITY_DN11566_c0_g1_i4	1
TRINITY_DN11566_c0_g1_i18	1
TRINITY_DN16941_c0_g1_i2	1
TRINITY_DN7783_c0_g1_i1	1
TRINITY_DN6297_c0_g2_i10	1
TRINITY_DN31021_c0_g1_i9	1
TRINITY_DN2035_c0_g1_i22	1
TRINITY_DN2035_c0_g1_i24	1
TRINITY_DN12678_c0_g1_i1	1
TRINITY_DN357_c0_g1_i38	1
TRINITY_DN357_c0_g1_i62	1
TRINITY_DN357_c0_g1_i54	1
TRINITY_DN357_c0_g1_i17	1
TRINITY_DN36111_c0_g1_i1	1
TRINITY_DN21147_c0_g1_i25	1
TRINITY_DN407_c0_g1_i16	1
TRINITY_DN14417_c1_g1_i9	1
TRINITY_DN14417_c1_g1_i3	1
TRINITY_DN49789_c0_g1_i2	1
TRINITY_DN86628_c0_g1_i1	1
TRINITY_DN118741_c0_g1_i1	1
TRINITY_DN92829_c0_g1_i1	1
TRINITY_DN80408_c0_g1_i1	1
TRINITY_DN9490_c0_g1_i1	1
TRINITY_DN1813_c0_g2_i28	1
TRINITY_DN1971_c0_g1_i4	1
TRINITY_DN1813_c0_g2_i17	1
TRINITY_DN73_c4_g1_i1	1
TRINITY_DN1971_c0_g1_i1	1
TRINITY_DN1971_c0_g1_i5	1
TRINITY_DN73_c4_g1_i3	1
TRINITY_DN1971_c0_g1_i10	1
TRINITY_DN1971_c0_g1_i7	1
TRINITY_DN105_c1_g1_i16	1
TRINITY_DN1604_c0_g1_i9	1
TRINITY_DN6694_c0_g1_i2	1
TRINITY_DN1337_c1_g1_i85	1
TRINITY_DN3757_c0_g1_i5	1
TRINITY_DN3376_c0_g1_i10	1
TRINITY_DN3376_c0_g1_i32	1
TRINITY_DN3376_c0_g1_i16	1
TRINITY_DN3376_c0_g1_i23	1
TRINITY_DN1100_c1_g1_i29	1
TRINITY_DN3849_c2_g1_i1	1
TRINITY_DN96476_c0_g1_i1	1
TRINITY_DN8574_c0_g1_i2	1
TRINITY_DN4440_c1_g1_i11	1
TRINITY_DN4440_c1_g1_i6	1
TRINITY_DN461_c1_g1_i214	1
TRINITY_DN461_c1_g1_i102	1
TRINITY_DN461_c1_g1_i110	1
TRINITY_DN8609_c0_g1_i8	1
TRINITY_DN17564_c0_g1_i12	1
TRINITY_DN17564_c0_g1_i3	1
TRINITY_DN7780_c0_g1_i6	1
TRINITY_DN21216_c0_g1_i1	1
TRINITY_DN2783_c2_g1_i176	1
TRINITY_DN29675_c0_g1_i26	1
TRINITY_DN10657_c0_g1_i13	1
TRINITY_DN10657_c0_g1_i14	1
TRINITY_DN10657_c0_g1_i19	1
TRINITY_DN6746_c0_g1_i24	1
TRINITY_DN56773_c0_g1_i1	1
TRINITY_DN933_c0_g1_i23	1
TRINITY_DN933_c0_g1_i15	1
TRINITY_DN1268_c1_g2_i17	1
TRINITY_DN5276_c0_g1_i6	1
TRINITY_DN4374_c0_g1_i1	1
TRINITY_DN105_c2_g1_i12	1
TRINITY_DN8318_c0_g1_i12	1
TRINITY_DN14473_c0_g1_i17	1
TRINITY_DN2348_c0_g1_i2	1
TRINITY_DN17937_c0_g1_i29	1
TRINITY_DN17937_c0_g1_i13	1
TRINITY_DN17937_c0_g1_i17	1
TRINITY_DN6486_c0_g1_i6	1
TRINITY_DN24888_c0_g1_i8	1
TRINITY_DN15920_c0_g1_i2	1
TRINITY_DN10674_c0_g2_i1	1
TRINITY_DN11852_c0_g1_i9	1
TRINITY_DN11852_c0_g1_i3	1
TRINITY_DN458_c0_g1_i16	1
TRINITY_DN458_c0_g1_i12	1
TRINITY_DN57996_c0_g1_i1	1
TRINITY_DN52883_c0_g1_i8	1
TRINITY_DN2077_c0_g1_i3	1
TRINITY_DN28684_c0_g2_i1	1
TRINITY_DN5300_c0_g1_i11	1
TRINITY_DN139_c0_g1_i90	1
TRINITY_DN139_c0_g1_i94	1
TRINITY_DN40067_c0_g1_i3	1
TRINITY_DN78954_c0_g1_i1	1
TRINITY_DN383_c3_g1_i2	1
TRINITY_DN1302_c0_g1_i5	1
TRINITY_DN129166_c0_g1_i1	1
TRINITY_DN1606_c0_g1_i30	1
TRINITY_DN1606_c0_g1_i58	1
TRINITY_DN456_c0_g1_i7	1
TRINITY_DN6954_c0_g1_i10	1
TRINITY_DN7272_c0_g1_i40	1
TRINITY_DN123586_c0_g1_i1	1
TRINITY_DN5548_c0_g1_i1	1
TRINITY_DN118163_c0_g1_i1	1
TRINITY_DN65268_c0_g1_i1	1
TRINITY_DN3808_c0_g1_i15	1
TRINITY_DN3808_c0_g1_i1	1
TRINITY_DN1026_c0_g1_i2	1
TRINITY_DN18237_c0_g1_i11	1
TRINITY_DN115722_c0_g1_i1	1
TRINITY_DN86335_c0_g1_i1	1
TRINITY_DN109562_c0_g1_i1	1
TRINITY_DN9655_c0_g3_i1	1
TRINITY_DN445_c0_g1_i15	1
TRINITY_DN7448_c0_g1_i2	1
TRINITY_DN3258_c0_g1_i1	1
TRINITY_DN3258_c0_g1_i2	1
TRINITY_DN3201_c0_g1_i29	1
TRINITY_DN10308_c0_g1_i28	1
TRINITY_DN3201_c0_g1_i24	1
TRINITY_DN23855_c0_g1_i1	1
TRINITY_DN2235_c0_g1_i16	1
TRINITY_DN131_c4_g1_i3	1
TRINITY_DN30189_c0_g1_i1	1
TRINITY_DN511_c0_g1_i12	1
TRINITY_DN75719_c0_g1_i1	1
TRINITY_DN0_c0_g1_i34	1
TRINITY_DN0_c0_g1_i39	1
TRINITY_DN0_c0_g1_i11	1
TRINITY_DN0_c0_g1_i48	1
TRINITY_DN0_c0_g1_i56	1
TRINITY_DN3746_c0_g1_i116	1
TRINITY_DN3746_c0_g1_i141	1
TRINITY_DN75472_c0_g1_i1	1
TRINITY_DN1306_c0_g1_i30	1
TRINITY_DN379_c0_g1_i12	1
TRINITY_DN20694_c0_g1_i2	1
TRINITY_DN15279_c0_g1_i22	1
TRINITY_DN1582_c0_g1_i45	1
TRINITY_DN1582_c0_g1_i101	1
TRINITY_DN13641_c0_g1_i3	1
TRINITY_DN11403_c0_g1_i7	1
TRINITY_DN1721_c0_g1_i61	1
TRINITY_DN21_c0_g1_i11	1
TRINITY_DN415_c0_g1_i14	1
TRINITY_DN415_c0_g1_i6	1
TRINITY_DN37453_c0_g1_i13	1
TRINITY_DN43295_c0_g1_i11	1
TRINITY_DN43295_c0_g1_i5	1
TRINITY_DN46017_c0_g1_i1	1
TRINITY_DN15941_c0_g1_i21	1
TRINITY_DN15941_c0_g1_i12	1
TRINITY_DN3284_c0_g1_i12	1
TRINITY_DN15941_c0_g1_i14	1
TRINITY_DN15941_c0_g1_i24	1
TRINITY_DN929_c0_g1_i11	1
TRINITY_DN7563_c0_g1_i27	1
TRINITY_DN50686_c0_g1_i4	1
TRINITY_DN7563_c0_g1_i37	1
TRINITY_DN46017_c0_g1_i2	1
TRINITY_DN415_c0_g1_i12	1
TRINITY_DN11579_c0_g1_i1	1
TRINITY_DN1279_c0_g1_i8	1
TRINITY_DN11364_c0_g2_i8	1
TRINITY_DN33375_c0_g1_i1	1
TRINITY_DN33375_c0_g1_i5	1
TRINITY_DN17470_c0_g1_i5	1
TRINITY_DN11897_c0_g1_i23	1
TRINITY_DN11897_c0_g1_i28	1
TRINITY_DN16730_c0_g1_i17	1
TRINITY_DN11897_c0_g1_i20	1
TRINITY_DN17470_c0_g1_i10	1
TRINITY_DN16730_c0_g1_i10	1
TRINITY_DN1520_c1_g1_i10	1
TRINITY_DN1520_c1_g1_i4	1
TRINITY_DN1520_c1_g1_i1	1
TRINITY_DN8321_c0_g1_i2	1
TRINITY_DN98420_c0_g1_i1	1
TRINITY_DN7692_c0_g1_i13	1
TRINITY_DN7692_c0_g1_i2	1
TRINITY_DN7692_c0_g1_i11	1
TRINITY_DN447_c0_g1_i17	1
TRINITY_DN56799_c0_g1_i9	1
TRINITY_DN27890_c0_g1_i14	1
TRINITY_DN20235_c0_g1_i4	1
TRINITY_DN22742_c0_g1_i5	1
TRINITY_DN1623_c0_g1_i26	1
TRINITY_DN7467_c0_g1_i4	1
TRINITY_DN8688_c0_g1_i1	1
TRINITY_DN54616_c0_g1_i1	1
TRINITY_DN14927_c0_g1_i17	1
TRINITY_DN14927_c0_g1_i79	1
TRINITY_DN10194_c0_g1_i12	1
TRINITY_DN37347_c0_g1_i4	1
TRINITY_DN34486_c0_g1_i1	1
TRINITY_DN30936_c0_g1_i10	1
TRINITY_DN12050_c0_g1_i3	1
TRINITY_DN1093_c0_g1_i5	1
TRINITY_DN7692_c0_g1_i12	1
TRINITY_DN15358_c0_g2_i14	1
TRINITY_DN6600_c0_g1_i12	1
TRINITY_DN4851_c0_g1_i3	1
TRINITY_DN6651_c0_g1_i3	1
TRINITY_DN12050_c0_g1_i8	1
TRINITY_DN30936_c0_g1_i4	1
TRINITY_DN3779_c0_g1_i1	1
TRINITY_DN6600_c0_g1_i16	1
TRINITY_DN4851_c0_g1_i10	1
TRINITY_DN1861_c0_g1_i2	1
TRINITY_DN7385_c0_g1_i1	1
TRINITY_DN2736_c0_g1_i18	1
TRINITY_DN2736_c0_g1_i6	1
TRINITY_DN15358_c0_g1_i3	1
TRINITY_DN17508_c1_g1_i4	1
TRINITY_DN17508_c1_g1_i3	1
TRINITY_DN35678_c0_g1_i1	1
TRINITY_DN2736_c0_g1_i2	1
TRINITY_DN2736_c0_g1_i14	1
TRINITY_DN1360_c1_g1_i3	1
TRINITY_DN30_c38_g1_i12	1
TRINITY_DN24572_c0_g1_i2	1
TRINITY_DN14043_c0_g1_i12	1
TRINITY_DN2736_c0_g1_i13	1
TRINITY_DN28219_c0_g1_i2	1
TRINITY_DN14043_c0_g1_i1	1
TRINITY_DN2165_c0_g1_i11	1
TRINITY_DN12838_c1_g1_i1	1
TRINITY_DN7079_c3_g3_i2	1
TRINITY_DN18439_c0_g2_i2	1
TRINITY_DN24572_c0_g1_i3	1
TRINITY_DN8108_c2_g1_i1	1
TRINITY_DN13161_c0_g1_i16	1
TRINITY_DN24261_c0_g1_i11	1
TRINITY_DN31472_c0_g1_i2	1
TRINITY_DN24261_c0_g1_i8	1
TRINITY_DN10583_c0_g4_i4	1
TRINITY_DN4187_c0_g1_i26	1
TRINITY_DN39940_c0_g2_i2	1
TRINITY_DN12619_c0_g1_i5	1
TRINITY_DN17508_c0_g1_i9	1
TRINITY_DN105_c2_g1_i24	1
TRINITY_DN14253_c0_g1_i2	1
TRINITY_DN2716_c0_g1_i4	1
TRINITY_DN24118_c0_g2_i2	1
TRINITY_DN27382_c0_g1_i13	1
TRINITY_DN12017_c0_g2_i42	1
TRINITY_DN2165_c0_g1_i14	1
TRINITY_DN18439_c0_g2_i7	1
TRINITY_DN12838_c0_g1_i26	1
TRINITY_DN58311_c0_g1_i2	1
TRINITY_DN140_c0_g1_i57	1
TRINITY_DN44838_c1_g1_i1	1
TRINITY_DN12241_c0_g2_i5	1
TRINITY_DN17508_c0_g1_i6	1
TRINITY_DN1346_c1_g1_i13	1
TRINITY_DN439_c0_g1_i6	1
TRINITY_DN12050_c0_g1_i9	1
TRINITY_DN4722_c1_g1_i3	1
TRINITY_DN439_c0_g1_i4	1
TRINITY_DN4081_c0_g2_i1	1
TRINITY_DN40296_c0_g1_i1	1
TRINITY_DN439_c0_g1_i11	1
TRINITY_DN4586_c0_g2_i1	1
TRINITY_DN19120_c0_g1_i6	1
TRINITY_DN4868_c0_g1_i16	1
TRINITY_DN439_c0_g1_i8	1
TRINITY_DN13095_c0_g1_i7	1
TRINITY_DN4187_c0_g1_i5	1
TRINITY_DN104412_c0_g1_i1	1
TRINITY_DN13095_c0_g1_i16	1
TRINITY_DN4081_c0_g1_i1	1
TRINITY_DN909_c0_g1_i1	1
TRINITY_DN18133_c0_g1_i4	1
TRINITY_DN1346_c1_g1_i16	1
TRINITY_DN11725_c0_g3_i1	1
TRINITY_DN1346_c1_g1_i6	1
TRINITY_DN4868_c0_g1_i1	1
TRINITY_DN439_c0_g1_i3	1
TRINITY_DN909_c0_g2_i10	1
TRINITY_DN16133_c0_g1_i9	1
TRINITY_DN57751_c0_g1_i3	1
TRINITY_DN439_c0_g1_i5	1
TRINITY_DN22107_c0_g2_i1	1
TRINITY_DN25402_c0_g1_i8	1
TRINITY_DN1346_c1_g1_i25	1
TRINITY_DN2165_c0_g1_i4	1
TRINITY_DN2952_c0_g1_i13	1
TRINITY_DN37077_c0_g2_i1	1
TRINITY_DN37077_c0_g2_i6	1
TRINITY_DN5140_c0_g2_i27	1
TRINITY_DN1934_c0_g1_i3	1
TRINITY_DN57751_c0_g1_i2	1
TRINITY_DN14063_c1_g1_i1	1
TRINITY_DN37077_c0_g2_i5	1
TRINITY_DN1174_c0_g1_i10	1
TRINITY_DN1174_c0_g1_i12	1
TRINITY_DN11857_c0_g1_i6	1
TRINITY_DN1065_c1_g1_i20	1
TRINITY_DN11857_c0_g1_i16	1
TRINITY_DN27868_c0_g1_i7	1
TRINITY_DN2952_c0_g1_i8	1
TRINITY_DN2165_c0_g1_i18	1
TRINITY_DN2952_c0_g1_i14	1
TRINITY_DN53_c0_g1_i7	1
TRINITY_DN21535_c0_g1_i18	1
TRINITY_DN13267_c0_g1_i35	1
TRINITY_DN37077_c0_g2_i14	1
TRINITY_DN37077_c0_g2_i3	1
TRINITY_DN26586_c0_g1_i31	1
TRINITY_DN4482_c0_g1_i6	1
TRINITY_DN1174_c0_g1_i13	1
TRINITY_DN5165_c0_g1_i7	1
TRINITY_DN7879_c0_g1_i21	1
TRINITY_DN7079_c1_g1_i3	1
TRINITY_DN5051_c0_g1_i26	1
TRINITY_DN25042_c0_g2_i1	1
TRINITY_DN37310_c1_g1_i1	1
TRINITY_DN544_c0_g1_i15	1
TRINITY_DN22464_c0_g1_i18	1
TRINITY_DN56798_c0_g1_i1	1
TRINITY_DN19229_c1_g1_i4	1
TRINITY_DN6310_c0_g1_i6	1
TRINITY_DN3723_c0_g3_i1	1
TRINITY_DN18014_c0_g1_i4	1
TRINITY_DN3723_c0_g2_i2	1
TRINITY_DN13988_c0_g1_i5	1
TRINITY_DN57751_c0_g1_i13	1
TRINITY_DN22563_c0_g1_i2	1
TRINITY_DN42537_c0_g1_i2	1
TRINITY_DN6651_c0_g2_i2	1
TRINITY_DN23194_c0_g1_i3	1
TRINITY_DN1750_c0_g1_i14	1
TRINITY_DN22563_c0_g1_i1	1
TRINITY_DN22430_c1_g1_i2	1
TRINITY_DN18014_c0_g1_i2	1
TRINITY_DN15549_c1_g1_i8	1
TRINITY_DN33164_c0_g1_i1	1
TRINITY_DN5810_c0_g1_i4	1
TRINITY_DN15387_c0_g1_i7	1
TRINITY_DN57046_c0_g1_i3	1
TRINITY_DN28699_c0_g2_i5	1
TRINITY_DN38611_c0_g2_i1	1
TRINITY_DN11725_c0_g1_i9	1
TRINITY_DN7370_c0_g1_i1	1
TRINITY_DN44078_c0_g1_i9	1
TRINITY_DN3968_c0_g1_i9	1
TRINITY_DN1093_c0_g1_i14	1
TRINITY_DN16712_c0_g1_i4	1
TRINITY_DN13296_c0_g1_i1	1
TRINITY_DN1093_c0_g1_i23	1
TRINITY_DN10264_c0_g1_i3	1
TRINITY_DN2887_c3_g1_i1	1
TRINITY_DN1093_c0_g1_i1	1
TRINITY_DN1093_c0_g1_i17	1
TRINITY_DN1065_c1_g1_i22	1
TRINITY_DN13095_c0_g1_i19	1
TRINITY_DN909_c0_g3_i1	1
TRINITY_DN2736_c0_g1_i3	1
TRINITY_DN1065_c1_g1_i11	1
TRINITY_DN1463_c0_g1_i18	1
TRINITY_DN544_c0_g1_i14	1
TRINITY_DN909_c0_g2_i3	1
TRINITY_DN10264_c0_g1_i1	1
TRINITY_DN1463_c0_g1_i1	1
TRINITY_DN7826_c0_g2_i9	1
TRINITY_DN1065_c1_g1_i8	1
TRINITY_DN23362_c0_g1_i3	1
TRINITY_DN14999_c0_g1_i5	1
TRINITY_DN10264_c0_g1_i2	1
TRINITY_DN16133_c0_g2_i1	1
TRINITY_DN1180_c5_g1_i1	1
TRINITY_DN1093_c0_g1_i20	1
TRINITY_DN23830_c0_g1_i10	1
TRINITY_DN544_c1_g1_i11	1
TRINITY_DN13505_c0_g1_i1	1
TRINITY_DN37402_c0_g1_i1	1
TRINITY_DN7692_c0_g1_i24	1
TRINITY_DN509_c2_g1_i5	1
TRINITY_DN7763_c0_g1_i1	1
TRINITY_DN910_c0_g1_i5	1
TRINITY_DN11725_c0_g1_i6	1
TRINITY_DN15720_c0_g1_i16	1
TRINITY_DN28745_c0_g1_i4	1
TRINITY_DN7692_c0_g1_i18	1
TRINITY_DN15720_c0_g1_i2	1
TRINITY_DN7692_c0_g1_i21	1
TRINITY_DN9331_c0_g1_i1	1
TRINITY_DN544_c0_g1_i16	1
TRINITY_DN14692_c0_g1_i18	1
TRINITY_DN9331_c0_g1_i17	1
TRINITY_DN2887_c1_g1_i29	1
TRINITY_DN45000_c0_g1_i1	1
TRINITY_DN544_c0_g1_i10	1
TRINITY_DN3968_c0_g1_i6	1
TRINITY_DN544_c0_g1_i3	1
TRINITY_DN9331_c0_g1_i8	1
TRINITY_DN14692_c0_g1_i9	1
TRINITY_DN2887_c1_g1_i44	1
TRINITY_DN544_c0_g1_i4	1
TRINITY_DN2887_c1_g1_i31	1
TRINITY_DN14692_c0_g1_i11	1
TRINITY_DN1757_c0_g1_i1	1
TRINITY_DN11762_c0_g1_i9	1
TRINITY_DN2887_c1_g1_i32	1
TRINITY_DN8649_c0_g1_i45	1
TRINITY_DN544_c1_g1_i8	1
TRINITY_DN2887_c1_g1_i40	1
TRINITY_DN140_c0_g1_i84	1
TRINITY_DN140_c0_g1_i55	1
TRINITY_DN802_c0_g1_i16	1
TRINITY_DN802_c0_g1_i2	1
TRINITY_DN2887_c1_g1_i18	1
TRINITY_DN140_c0_g1_i18	1
TRINITY_DN9331_c0_g1_i14	1
TRINITY_DN18160_c1_g1_i5	1
TRINITY_DN9331_c0_g1_i15	1
TRINITY_DN9331_c0_g1_i3	1
TRINITY_DN6383_c1_g1_i2	1
TRINITY_DN9331_c0_g1_i4	1
TRINITY_DN1073_c0_g1_i13	1
TRINITY_DN802_c0_g1_i11	1
TRINITY_DN9331_c0_g1_i9	1
TRINITY_DN1463_c0_g1_i35	1
TRINITY_DN1463_c0_g1_i8	1
TRINITY_DN24572_c0_g2_i1	1
TRINITY_DN3968_c0_g1_i12	1
TRINITY_DN9331_c0_g1_i5	1
TRINITY_DN10583_c0_g2_i2	1
TRINITY_DN447_c0_g1_i10	1
TRINITY_DN9331_c0_g1_i10	1
TRINITY_DN1963_c1_g1_i19	1
TRINITY_DN738_c0_g1_i41	1
TRINITY_DN27023_c0_g1_i4	1
TRINITY_DN27023_c0_g1_i2	1
TRINITY_DN11842_c0_g1_i1	1
TRINITY_DN2401_c0_g1_i11	1
TRINITY_DN3425_c0_g1_i24	1
TRINITY_DN2034_c0_g1_i90	1
TRINITY_DN2034_c0_g1_i142	1
TRINITY_DN2034_c0_g1_i86	1
TRINITY_DN2460_c0_g1_i6	1
TRINITY_DN3589_c0_g2_i1	1
TRINITY_DN4350_c0_g1_i4	1
TRINITY_DN1462_c0_g1_i7	1
TRINITY_DN1462_c0_g1_i5	1
TRINITY_DN1462_c0_g1_i13	1
TRINITY_DN1462_c0_g2_i2	1
TRINITY_DN19_c0_g1_i13	1
TRINITY_DN19_c0_g1_i3	1
TRINITY_DN19_c0_g1_i10	1
TRINITY_DN23298_c2_g1_i25	1
TRINITY_DN135500_c0_g1_i1	1
TRINITY_DN4295_c0_g1_i42	1
TRINITY_DN4295_c0_g1_i6	1
TRINITY_DN2444_c0_g1_i5	1
TRINITY_DN50168_c0_g2_i1	1
TRINITY_DN1509_c0_g1_i6	1
TRINITY_DN1474_c0_g1_i61	1
TRINITY_DN1474_c0_g1_i62	1
TRINITY_DN8_c1_g1_i24	1
TRINITY_DN8_c1_g1_i60	1
TRINITY_DN8_c1_g1_i3	1
TRINITY_DN8_c1_g1_i20	1
TRINITY_DN8_c1_g1_i19	1
TRINITY_DN4298_c0_g1_i6	1
TRINITY_DN4298_c0_g1_i1	1
TRINITY_DN3992_c0_g1_i30	1
TRINITY_DN2827_c1_g1_i27	1
TRINITY_DN3992_c0_g1_i18	1
TRINITY_DN3992_c0_g1_i12	1
TRINITY_DN2827_c1_g1_i15	1
TRINITY_DN12871_c0_g1_i3	1
TRINITY_DN52_c0_g1_i14	1
TRINITY_DN52_c0_g1_i124	1
TRINITY_DN52_c0_g1_i254	1
TRINITY_DN3051_c0_g1_i39	1
TRINITY_DN6319_c0_g1_i5	1
TRINITY_DN44562_c0_g1_i1	1
TRINITY_DN44562_c0_g1_i6	1
TRINITY_DN198_c2_g1_i4	1
TRINITY_DN9604_c0_g1_i2	1
TRINITY_DN198_c2_g1_i6	1
TRINITY_DN9604_c0_g1_i1	1
TRINITY_DN44562_c0_g1_i10	1
TRINITY_DN1332_c0_g1_i13	1
TRINITY_DN5249_c0_g1_i7	1
TRINITY_DN17408_c0_g1_i1	1
TRINITY_DN17408_c0_g1_i19	1
TRINITY_DN3100_c0_g1_i28	1
TRINITY_DN3100_c0_g1_i29	1
TRINITY_DN1041_c0_g1_i28	1
TRINITY_DN78164_c0_g1_i1	1
TRINITY_DN5136_c0_g1_i16	1
TRINITY_DN80712_c0_g1_i1	1
TRINITY_DN83250_c0_g1_i1	1
TRINITY_DN2779_c0_g1_i8	1
TRINITY_DN14821_c1_g1_i2	1
TRINITY_DN4086_c1_g1_i6	1
TRINITY_DN4086_c1_g1_i5	1
TRINITY_DN4086_c1_g1_i2	1
TRINITY_DN1555_c0_g2_i6	1
TRINITY_DN108_c7_g1_i2	1
TRINITY_DN1332_c0_g1_i7	1
TRINITY_DN1332_c0_g1_i22	1
TRINITY_DN11411_c0_g1_i21	1
TRINITY_DN1473_c0_g1_i5	1
TRINITY_DN4848_c0_g1_i24	1
TRINITY_DN1473_c0_g1_i1	1
TRINITY_DN280_c0_g1_i26	1
TRINITY_DN11111_c0_g1_i15	1
TRINITY_DN14665_c0_g1_i4	1
TRINITY_DN31830_c0_g1_i1	1
TRINITY_DN10975_c0_g1_i31	1
TRINITY_DN10975_c0_g1_i28	1
TRINITY_DN9437_c0_g1_i1	1
TRINITY_DN9437_c0_g1_i3	1
TRINITY_DN1895_c0_g1_i193	1
TRINITY_DN3663_c0_g1_i1	1
TRINITY_DN10798_c0_g1_i6	1
TRINITY_DN10798_c0_g1_i3	1
TRINITY_DN10041_c0_g1_i1	1
TRINITY_DN1626_c0_g1_i53	1
TRINITY_DN1626_c0_g1_i18	1
TRINITY_DN8732_c0_g1_i7	1
TRINITY_DN1050_c0_g1_i18	1
TRINITY_DN1050_c0_g1_i20	1
TRINITY_DN16028_c0_g1_i10	1
TRINITY_DN2870_c0_g1_i4	1
TRINITY_DN53853_c0_g1_i2	1
TRINITY_DN234_c2_g1_i9	1
TRINITY_DN5395_c0_g1_i1	1
TRINITY_DN3728_c0_g1_i33	1
TRINITY_DN115766_c0_g1_i1	1
TRINITY_DN929_c0_g1_i12	1
TRINITY_DN929_c0_g1_i28	1
TRINITY_DN929_c0_g1_i42	1
TRINITY_DN15588_c1_g1_i2	1
TRINITY_DN11117_c0_g1_i4	1
TRINITY_DN4063_c0_g1_i60	1
TRINITY_DN1488_c0_g1_i16	1
TRINITY_DN14881_c0_g2_i1	1
TRINITY_DN3275_c0_g1_i2	1
TRINITY_DN3275_c0_g1_i17	1
TRINITY_DN73_c1_g2_i1	1
TRINITY_DN73_c1_g2_i12	1
TRINITY_DN73_c1_g2_i17	1
TRINITY_DN10923_c0_g1_i11	1
TRINITY_DN1337_c1_g1_i95	1
TRINITY_DN1782_c0_g1_i81	1
TRINITY_DN7775_c0_g1_i17	1
TRINITY_DN4168_c0_g1_i9	1
TRINITY_DN3140_c0_g1_i14	1
TRINITY_DN3140_c0_g1_i4	1
TRINITY_DN5325_c0_g1_i1	1
TRINITY_DN2721_c0_g1_i32	1
TRINITY_DN1097_c0_g1_i5	1
TRINITY_DN1097_c0_g1_i4	1
TRINITY_DN8364_c0_g1_i13	1
TRINITY_DN68404_c0_g1_i1	1
TRINITY_DN8715_c0_g1_i7	1
TRINITY_DN2941_c0_g1_i21	1
TRINITY_DN658_c0_g1_i13	1
TRINITY_DN721_c0_g1_i36	1
TRINITY_DN721_c0_g1_i33	1
TRINITY_DN39961_c1_g1_i2	1
TRINITY_DN3976_c0_g1_i16	1
TRINITY_DN10172_c0_g2_i1	1
TRINITY_DN282_c0_g1_i1	1
TRINITY_DN282_c0_g1_i3	1
TRINITY_DN282_c0_g1_i13	1
TRINITY_DN282_c0_g1_i8	1
TRINITY_DN282_c0_g1_i11	1
TRINITY_DN282_c0_g1_i6	1
TRINITY_DN3976_c0_g1_i40	1
TRINITY_DN3976_c0_g1_i19	1
TRINITY_DN46602_c0_g1_i1	1
TRINITY_DN745_c0_g1_i39	1
TRINITY_DN745_c0_g1_i48	1
TRINITY_DN29156_c0_g1_i4	1
TRINITY_DN789_c0_g1_i57	1
TRINITY_DN17648_c1_g1_i7	1
TRINITY_DN17648_c1_g1_i55	1
TRINITY_DN789_c0_g1_i6	1
TRINITY_DN1248_c0_g1_i3	1
TRINITY_DN14463_c0_g1_i1	1
TRINITY_DN36790_c1_g1_i2	1
TRINITY_DN14463_c0_g1_i2	1
TRINITY_DN10636_c0_g1_i7	1
TRINITY_DN3502_c0_g1_i1	1
TRINITY_DN7399_c0_g1_i1	1
TRINITY_DN41384_c0_g1_i5	1
TRINITY_DN45744_c0_g1_i1	1
TRINITY_DN53962_c1_g1_i1	1
TRINITY_DN139417_c0_g1_i1	1
TRINITY_DN121157_c0_g1_i1	1
TRINITY_DN142140_c0_g1_i1	1
TRINITY_DN46130_c2_g1_i1	1
TRINITY_DN59456_c1_g1_i1	1
TRINITY_DN46130_c0_g1_i1	1
TRINITY_DN490_c1_g1_i9	1
TRINITY_DN1916_c0_g1_i7	1
TRINITY_DN40096_c0_g1_i1	1
TRINITY_DN1743_c0_g1_i10	1
TRINITY_DN25568_c0_g2_i2	1
TRINITY_DN135927_c0_g1_i1	1
TRINITY_DN1738_c0_g1_i67	1
TRINITY_DN665_c0_g1_i6	1
TRINITY_DN16796_c0_g1_i3	1
TRINITY_DN136308_c0_g1_i1	1
TRINITY_DN1164_c3_g1_i4	1
TRINITY_DN1164_c3_g1_i2	1
TRINITY_DN10767_c0_g1_i54	1
TRINITY_DN10767_c0_g1_i67	1
TRINITY_DN18222_c0_g1_i2	1
TRINITY_DN8704_c0_g1_i68	1
TRINITY_DN57737_c0_g1_i10	1
TRINITY_DN7895_c0_g1_i6	1
TRINITY_DN8018_c0_g1_i9	1
TRINITY_DN10709_c0_g1_i11	1
TRINITY_DN10709_c0_g1_i3	1
TRINITY_DN10121_c0_g1_i23	1
TRINITY_DN10121_c0_g1_i56	1
TRINITY_DN3906_c0_g1_i65	1
TRINITY_DN20589_c0_g1_i4	1
TRINITY_DN10821_c1_g3_i3	1
TRINITY_DN11200_c0_g5_i2	1
TRINITY_DN3906_c0_g1_i17	1
TRINITY_DN14763_c1_g1_i2	1
TRINITY_DN1942_c0_g1_i34	1
TRINITY_DN3906_c0_g1_i16	1
TRINITY_DN1942_c0_g1_i105	1
TRINITY_DN1942_c0_g1_i28	1
TRINITY_DN2956_c0_g1_i28	1
TRINITY_DN2956_c0_g1_i20	1
TRINITY_DN2956_c0_g1_i29	1
TRINITY_DN83085_c0_g1_i1	1
TRINITY_DN102870_c0_g1_i1	1
TRINITY_DN71152_c0_g1_i1	1
TRINITY_DN64111_c0_g1_i1	1
TRINITY_DN17470_c0_g1_i6	1
TRINITY_DN11403_c0_g1_i6	1
TRINITY_DN4831_c1_g1_i12	1
TRINITY_DN19125_c0_g1_i5	1
TRINITY_DN19125_c0_g1_i6	1
TRINITY_DN21971_c0_g2_i4	1
TRINITY_DN19125_c0_g1_i9	1
TRINITY_DN21971_c0_g2_i1	1
TRINITY_DN35355_c0_g1_i10	1
TRINITY_DN35355_c0_g1_i2	1
TRINITY_DN18333_c0_g1_i19	1
TRINITY_DN18333_c0_g1_i8	1
TRINITY_DN26213_c0_g1_i1	1
TRINITY_DN2384_c0_g1_i13	1
TRINITY_DN8979_c0_g2_i10	1
TRINITY_DN17247_c0_g1_i4	1
TRINITY_DN17247_c0_g1_i6	1
TRINITY_DN52234_c0_g1_i3	1
TRINITY_DN1653_c0_g1_i152	1
TRINITY_DN1653_c0_g1_i6	1
TRINITY_DN27491_c1_g2_i5	1
TRINITY_DN1118_c0_g1_i7	1
TRINITY_DN1993_c0_g1_i11	1
TRINITY_DN7617_c0_g1_i13	1
TRINITY_DN7617_c0_g1_i61	1
TRINITY_DN7617_c0_g1_i70	1
TRINITY_DN6086_c0_g1_i18	1
TRINITY_DN136457_c0_g1_i1	1
TRINITY_DN15853_c0_g1_i7	1
TRINITY_DN15853_c0_g1_i2	1
TRINITY_DN60279_c0_g1_i1	1
TRINITY_DN2651_c0_g1_i7	1
TRINITY_DN41011_c0_g1_i1	1
TRINITY_DN1066_c0_g2_i58	1
TRINITY_DN1066_c0_g2_i35	1
TRINITY_DN8973_c0_g1_i4	1
TRINITY_DN2183_c0_g1_i6	1
TRINITY_DN27020_c0_g1_i1	1
TRINITY_DN33138_c0_g1_i3	1
TRINITY_DN698_c0_g1_i13	1
TRINITY_DN698_c0_g1_i60	1
TRINITY_DN13190_c0_g1_i20	1
TRINITY_DN13190_c0_g1_i17	1
TRINITY_DN4190_c0_g1_i7	1
TRINITY_DN15131_c0_g1_i7	1
TRINITY_DN6796_c0_g1_i48	1
TRINITY_DN12757_c0_g1_i2	1
TRINITY_DN12757_c0_g1_i31	1
TRINITY_DN12757_c0_g1_i22	1
TRINITY_DN14086_c0_g1_i13	1
TRINITY_DN3651_c0_g1_i184	1
TRINITY_DN799_c1_g2_i7	1
TRINITY_DN5965_c0_g1_i9	1
TRINITY_DN5965_c0_g1_i12	1
TRINITY_DN5965_c0_g1_i10	1
TRINITY_DN6945_c0_g1_i3	1
TRINITY_DN3341_c0_g1_i13	1
TRINITY_DN2799_c0_g1_i12	1
TRINITY_DN2799_c0_g1_i19	1
TRINITY_DN18177_c0_g1_i2	1
TRINITY_DN18177_c0_g1_i8	1
TRINITY_DN9553_c0_g1_i12	1
TRINITY_DN34362_c0_g1_i2	1
TRINITY_DN2266_c1_g1_i7	1
TRINITY_DN10610_c0_g1_i21	1
TRINITY_DN4698_c0_g1_i4	1
TRINITY_DN3512_c0_g1_i5	1
TRINITY_DN15276_c0_g1_i2	1
TRINITY_DN58209_c0_g1_i1	1
TRINITY_DN2596_c1_g1_i3	1
TRINITY_DN8491_c0_g1_i7	1
TRINITY_DN11827_c1_g1_i6	1
TRINITY_DN3735_c0_g1_i1	1
TRINITY_DN1161_c1_g1_i10	1
TRINITY_DN18605_c0_g1_i1	1
TRINITY_DN18605_c0_g1_i12	1
TRINITY_DN23461_c0_g1_i1	1
TRINITY_DN1161_c1_g1_i20	1
TRINITY_DN16687_c0_g1_i14	1
TRINITY_DN26977_c0_g1_i16	1
TRINITY_DN26977_c0_g1_i6	1
TRINITY_DN26977_c0_g1_i1	1
TRINITY_DN128_c0_g1_i8	1
TRINITY_DN34219_c0_g1_i1	1
TRINITY_DN30900_c0_g1_i1	1
TRINITY_DN14450_c0_g1_i8	1
TRINITY_DN125881_c0_g1_i1	1
TRINITY_DN17209_c0_g1_i7	1
TRINITY_DN22106_c0_g1_i1	1
TRINITY_DN22106_c0_g1_i8	1
TRINITY_DN8157_c0_g1_i12	1
TRINITY_DN4021_c0_g1_i7	1
TRINITY_DN39164_c0_g1_i1	1
TRINITY_DN19111_c0_g1_i2	1
TRINITY_DN42885_c2_g1_i2	1
TRINITY_DN3849_c0_g1_i79	1
TRINITY_DN10051_c0_g1_i3	1
TRINITY_DN3307_c1_g1_i12	1
TRINITY_DN3307_c1_g1_i19	1
TRINITY_DN3307_c1_g1_i16	1
TRINITY_DN547_c1_g1_i102	1
TRINITY_DN15955_c0_g1_i10	1
TRINITY_DN5310_c0_g1_i76	1
TRINITY_DN5310_c0_g1_i70	1
TRINITY_DN3893_c0_g1_i1	1
TRINITY_DN3532_c0_g1_i15	1
TRINITY_DN3532_c0_g1_i16	1
TRINITY_DN7758_c0_g1_i28	1
TRINITY_DN141254_c0_g1_i1	1
TRINITY_DN7024_c0_g1_i94	1
TRINITY_DN7024_c0_g1_i7	1
TRINITY_DN7024_c0_g1_i14	1
TRINITY_DN1159_c0_g1_i1	1
TRINITY_DN101703_c0_g1_i1	1
TRINITY_DN568_c0_g1_i18	1
TRINITY_DN568_c0_g1_i14	1
TRINITY_DN106_c0_g2_i1	1
TRINITY_DN918_c1_g1_i2	1
TRINITY_DN64_c0_g1_i67	1
TRINITY_DN15248_c0_g2_i12	1
TRINITY_DN15248_c0_g2_i10	1
TRINITY_DN15248_c0_g1_i20	1
TRINITY_DN10887_c0_g1_i9	1
TRINITY_DN429_c0_g1_i1	1
TRINITY_DN9191_c0_g1_i9	1
TRINITY_DN89812_c0_g1_i1	1
TRINITY_DN14855_c1_g1_i1	1
TRINITY_DN3780_c0_g1_i5	1
TRINITY_DN3140_c0_g1_i15	1
TRINITY_DN12822_c0_g1_i1	1
TRINITY_DN1035_c1_g1_i18	1
TRINITY_DN6476_c0_g1_i1	1
TRINITY_DN842_c0_g1_i17	1
TRINITY_DN842_c0_g1_i3	1
TRINITY_DN842_c0_g1_i31	1
TRINITY_DN4547_c0_g1_i7	1
TRINITY_DN171_c0_g1_i83	1
TRINITY_DN463_c0_g1_i31	1
TRINITY_DN361_c0_g1_i29	1
TRINITY_DN361_c0_g1_i10	1
TRINITY_DN361_c0_g1_i9	1
TRINITY_DN4229_c0_g1_i13	1
TRINITY_DN6548_c0_g1_i84	1
TRINITY_DN2505_c0_g1_i46	1
TRINITY_DN3417_c0_g1_i3	1
TRINITY_DN3427_c0_g1_i3	1
TRINITY_DN1898_c0_g1_i19	1
TRINITY_DN3718_c0_g1_i25	1
TRINITY_DN2458_c0_g1_i1	1
TRINITY_DN318_c3_g1_i2	1
TRINITY_DN2355_c1_g1_i7	1
TRINITY_DN2355_c1_g1_i6	1
TRINITY_DN21379_c0_g1_i12	1
TRINITY_DN11986_c0_g1_i23	1
TRINITY_DN11986_c0_g1_i15	1
TRINITY_DN4006_c0_g1_i12	1
TRINITY_DN10622_c0_g1_i21	1
TRINITY_DN424_c0_g1_i41	1
TRINITY_DN4006_c0_g1_i34	1
TRINITY_DN4006_c0_g1_i27	1
TRINITY_DN17353_c1_g1_i1	1
TRINITY_DN30631_c0_g2_i1	1
TRINITY_DN56016_c0_g1_i1	1
TRINITY_DN30631_c1_g1_i1	1
TRINITY_DN28669_c0_g1_i1	1
TRINITY_DN2359_c0_g1_i15	1
TRINITY_DN74288_c0_g1_i1	1
TRINITY_DN58264_c0_g1_i1	1
TRINITY_DN58264_c1_g1_i1	1
TRINITY_DN16480_c0_g1_i1	1
TRINITY_DN86_c0_g1_i6	1
TRINITY_DN8780_c2_g1_i12	1
TRINITY_DN2378_c0_g2_i3	1
TRINITY_DN8673_c0_g2_i4	1
TRINITY_DN8780_c2_g1_i8	1
TRINITY_DN8673_c0_g2_i2	1
TRINITY_DN41917_c0_g1_i3	1
TRINITY_DN136466_c0_g1_i1	1
TRINITY_DN19376_c0_g1_i1	1
TRINITY_DN15678_c0_g1_i55	1
TRINITY_DN15678_c0_g1_i57	1
TRINITY_DN15678_c0_g1_i36	1
TRINITY_DN15678_c0_g1_i12	1
TRINITY_DN15678_c0_g1_i1	1
TRINITY_DN15871_c0_g1_i1	1
TRINITY_DN15871_c0_g1_i40	1
TRINITY_DN15871_c0_g1_i19	1
TRINITY_DN1415_c0_g1_i36	1
TRINITY_DN7688_c0_g1_i17	1
TRINITY_DN12196_c0_g1_i1	1
TRINITY_DN1415_c0_g1_i9	1
TRINITY_DN1415_c0_g1_i20	1
TRINITY_DN1415_c0_g1_i33	1
TRINITY_DN7_c0_g1_i4	1
TRINITY_DN7_c0_g1_i35	1
TRINITY_DN1415_c0_g1_i15	1
TRINITY_DN2814_c0_g1_i2	1
TRINITY_DN1346_c21_g1_i3	1
TRINITY_DN1346_c21_g1_i6	1
TRINITY_DN27441_c0_g1_i1	1
TRINITY_DN5166_c0_g1_i2	1
TRINITY_DN121086_c0_g1_i1	1
TRINITY_DN107613_c0_g1_i1	1
TRINITY_DN5802_c0_g1_i1	1
TRINITY_DN552_c3_g1_i2	1
TRINITY_DN4331_c0_g1_i3	1
TRINITY_DN4331_c0_g1_i10	1
TRINITY_DN1884_c0_g1_i3	1
TRINITY_DN829_c0_g1_i5	1
TRINITY_DN440_c0_g1_i3	1
TRINITY_DN3563_c0_g1_i19	1
TRINITY_DN47924_c0_g1_i19	1
TRINITY_DN488_c0_g1_i2	1
TRINITY_DN7769_c0_g1_i5	1
TRINITY_DN488_c0_g1_i15	1
TRINITY_DN3264_c0_g1_i14	1
TRINITY_DN5404_c0_g1_i4	1
TRINITY_DN4649_c0_g1_i4	1
TRINITY_DN37306_c0_g1_i21	1
TRINITY_DN3999_c0_g1_i9	1
TRINITY_DN3999_c0_g1_i18	1
TRINITY_DN22422_c0_g1_i21	1
TRINITY_DN3898_c0_g1_i10	1
TRINITY_DN3898_c0_g1_i12	1
TRINITY_DN108323_c0_g1_i1	1
TRINITY_DN2423_c0_g1_i2	1
TRINITY_DN7326_c0_g1_i229	1
TRINITY_DN4296_c0_g1_i4	1
TRINITY_DN1598_c0_g1_i41	1
TRINITY_DN1598_c0_g1_i8	1
TRINITY_DN1598_c0_g1_i32	1
TRINITY_DN25479_c0_g1_i3	1
TRINITY_DN3081_c0_g1_i1	1
TRINITY_DN67399_c0_g1_i1	1
TRINITY_DN84331_c0_g1_i1	1
TRINITY_DN319_c2_g1_i43	1
TRINITY_DN319_c2_g1_i27	1
TRINITY_DN7466_c0_g1_i1	1
TRINITY_DN319_c2_g1_i30	1
TRINITY_DN5641_c0_g1_i2	1
TRINITY_DN1698_c0_g2_i4	1
TRINITY_DN4445_c0_g1_i44	1
TRINITY_DN59824_c0_g1_i1	1
TRINITY_DN2885_c0_g1_i10	1
TRINITY_DN2885_c0_g1_i15	1
TRINITY_DN3210_c0_g1_i38	1
TRINITY_DN3210_c0_g1_i109	1
TRINITY_DN3210_c0_g1_i77	1
TRINITY_DN3210_c0_g1_i117	1
TRINITY_DN2249_c0_g1_i61	1
TRINITY_DN5870_c0_g1_i49	1
TRINITY_DN5870_c0_g1_i23	1
TRINITY_DN2487_c0_g1_i2	1
TRINITY_DN1895_c0_g1_i152	1
TRINITY_DN1895_c0_g1_i94	1
TRINITY_DN97012_c0_g1_i1	1
TRINITY_DN168_c0_g1_i10	1
TRINITY_DN168_c0_g1_i9	1
TRINITY_DN1946_c0_g1_i8	1
TRINITY_DN1946_c0_g1_i5	1
TRINITY_DN1946_c0_g1_i16	1
TRINITY_DN1124_c0_g1_i4	1
TRINITY_DN12558_c1_g1_i1	1
TRINITY_DN15527_c0_g1_i2	1
TRINITY_DN90378_c0_g1_i1	1
TRINITY_DN2069_c0_g1_i13	1
TRINITY_DN2069_c0_g1_i1	1
TRINITY_DN5774_c0_g1_i10	1
TRINITY_DN19890_c0_g1_i2	1
TRINITY_DN103157_c0_g1_i1	1
TRINITY_DN126770_c0_g1_i1	1
TRINITY_DN76640_c0_g1_i1	1
TRINITY_DN1447_c0_g1_i7	1
TRINITY_DN2819_c1_g1_i6	1
TRINITY_DN584_c1_g1_i27	1
TRINITY_DN584_c1_g1_i11	1
TRINITY_DN4747_c0_g1_i1	1
TRINITY_DN4747_c0_g1_i17	1
TRINITY_DN131284_c0_g1_i1	1
TRINITY_DN443_c0_g1_i63	1
TRINITY_DN443_c0_g1_i22	1
TRINITY_DN443_c0_g1_i71	1
TRINITY_DN1179_c0_g1_i75	1
TRINITY_DN1311_c0_g1_i39	1
TRINITY_DN8630_c0_g1_i3	1
TRINITY_DN26659_c0_g1_i7	1
TRINITY_DN5_c4_g2_i9	1
TRINITY_DN6628_c0_g2_i2	1
TRINITY_DN81142_c0_g1_i1	1
TRINITY_DN23298_c2_g1_i16	1
TRINITY_DN622_c0_g1_i17	1
TRINITY_DN622_c0_g1_i22	1
TRINITY_DN622_c0_g1_i3	1
TRINITY_DN622_c0_g1_i4	1
TRINITY_DN1892_c0_g1_i14	1
TRINITY_DN1229_c0_g1_i14	1
TRINITY_DN19305_c2_g1_i1	1
TRINITY_DN12265_c0_g1_i4	1
TRINITY_DN12117_c0_g1_i13	1
TRINITY_DN1574_c0_g1_i4	1
TRINITY_DN29272_c0_g1_i7	1
TRINITY_DN19611_c1_g1_i1	1
TRINITY_DN15667_c0_g2_i7	1
TRINITY_DN56405_c1_g1_i4	1
TRINITY_DN13971_c0_g1_i18	1
TRINITY_DN6804_c0_g1_i1	1
TRINITY_DN21460_c0_g1_i1	1
TRINITY_DN8748_c0_g1_i13	1
TRINITY_DN1838_c0_g1_i33	1
TRINITY_DN7989_c0_g1_i9	1
TRINITY_DN11170_c0_g1_i4	1
TRINITY_DN240_c0_g1_i21	1
TRINITY_DN15335_c0_g1_i1	1
TRINITY_DN24737_c0_g3_i2	1
TRINITY_DN35793_c1_g1_i2	1
TRINITY_DN36347_c0_g1_i1	1
TRINITY_DN8748_c0_g1_i2	1
TRINITY_DN42582_c1_g2_i1	1
TRINITY_DN1876_c1_g1_i10	1
TRINITY_DN371_c1_g1_i9	1
TRINITY_DN3778_c0_g1_i2	1
TRINITY_DN12785_c0_g1_i9	1
TRINITY_DN45050_c0_g1_i5	1
TRINITY_DN4297_c0_g1_i19	1
TRINITY_DN3316_c0_g1_i48	1
TRINITY_DN17430_c3_g1_i1	1
TRINITY_DN10047_c1_g1_i3	1
TRINITY_DN19098_c0_g1_i1	1
TRINITY_DN15335_c0_g1_i3	1
TRINITY_DN11246_c2_g1_i1	1
TRINITY_DN859_c0_g1_i65	1
TRINITY_DN47097_c0_g1_i2	1
TRINITY_DN2660_c0_g1_i67	1
TRINITY_DN12117_c0_g1_i2	1
TRINITY_DN4615_c2_g1_i1	1
TRINITY_DN9042_c6_g1_i1	1
TRINITY_DN13116_c0_g1_i3	1
TRINITY_DN15667_c0_g2_i13	1
TRINITY_DN11170_c0_g1_i2	1
TRINITY_DN5848_c0_g1_i6	1
TRINITY_DN8748_c0_g1_i18	1
TRINITY_DN15664_c2_g1_i1	1
TRINITY_DN7820_c0_g1_i15	1
TRINITY_DN56405_c1_g1_i1	1
TRINITY_DN31557_c0_g2_i1	1
TRINITY_DN30860_c0_g1_i10	1
TRINITY_DN43163_c0_g1_i2	1
TRINITY_DN1876_c0_g1_i9	1
TRINITY_DN5016_c0_g1_i22	1
TRINITY_DN7802_c0_g1_i8	1
TRINITY_DN8717_c0_g1_i27	1
TRINITY_DN27168_c0_g1_i1	1
TRINITY_DN5476_c1_g1_i2	1
TRINITY_DN54_c0_g1_i7	1
TRINITY_DN24934_c0_g2_i1	1
TRINITY_DN8748_c0_g1_i7	1
TRINITY_DN3778_c0_g1_i18	1
TRINITY_DN15351_c0_g2_i3	1
TRINITY_DN11170_c0_g1_i1	1
TRINITY_DN15789_c0_g2_i3	1
TRINITY_DN1400_c0_g1_i37	1
TRINITY_DN15351_c0_g2_i2	1
TRINITY_DN14757_c0_g1_i16	1
TRINITY_DN16447_c0_g1_i5	1
TRINITY_DN10215_c0_g1_i1	1
TRINITY_DN1869_c0_g1_i23	1
TRINITY_DN8532_c0_g1_i41	1
TRINITY_DN3021_c0_g1_i3	1
TRINITY_DN1537_c0_g1_i4	1
TRINITY_DN6035_c0_g1_i6	1
TRINITY_DN4375_c0_g1_i5	1
TRINITY_DN20390_c0_g1_i13	1
TRINITY_DN16447_c0_g1_i6	1
TRINITY_DN3316_c0_g1_i1	1
TRINITY_DN8532_c0_g1_i5	1
TRINITY_DN6637_c0_g2_i4	1
TRINITY_DN11224_c0_g1_i11	1
TRINITY_DN8057_c1_g1_i1	1
TRINITY_DN9341_c0_g1_i14	1
TRINITY_DN24390_c0_g1_i16	1
TRINITY_DN2177_c0_g1_i1	1
TRINITY_DN11097_c0_g1_i1	1
TRINITY_DN12785_c0_g1_i18	1
TRINITY_DN859_c1_g1_i6	1
TRINITY_DN9042_c1_g1_i3	1
TRINITY_DN12006_c0_g1_i20	1
TRINITY_DN2553_c2_g1_i7	1
TRINITY_DN7820_c0_g1_i13	1
TRINITY_DN15351_c0_g2_i1	1
TRINITY_DN41535_c0_g1_i11	1
TRINITY_DN41535_c0_g1_i10	1
TRINITY_DN1537_c0_g1_i10	1
TRINITY_DN22684_c0_g1_i9	1
TRINITY_DN422_c0_g1_i1	1
TRINITY_DN2913_c0_g1_i9	1
TRINITY_DN40287_c0_g1_i2	1
TRINITY_DN24827_c0_g1_i9	1
TRINITY_DN7395_c1_g1_i10	1
TRINITY_DN38747_c0_g1_i2	1
TRINITY_DN28924_c0_g2_i1	1
TRINITY_DN9855_c0_g1_i2	1
TRINITY_DN859_c0_g1_i9	1
TRINITY_DN21842_c0_g1_i1	1
TRINITY_DN6035_c0_g1_i4	1
TRINITY_DN998_c0_g1_i24	1
TRINITY_DN9303_c0_g1_i11	1
TRINITY_DN24390_c0_g1_i18	1
TRINITY_DN23146_c0_g1_i1	1
TRINITY_DN11291_c0_g1_i13	1
TRINITY_DN6089_c0_g1_i4	1
TRINITY_DN12877_c1_g1_i1	1
TRINITY_DN21517_c0_g1_i6	1
TRINITY_DN1400_c0_g1_i41	1
TRINITY_DN19485_c4_g1_i1	1
TRINITY_DN11291_c0_g1_i2	1
TRINITY_DN36347_c0_g1_i4	1
TRINITY_DN12785_c0_g1_i7	1
TRINITY_DN1876_c0_g1_i11	1
TRINITY_DN8792_c5_g1_i7	1
TRINITY_DN8748_c0_g1_i3	1
TRINITY_DN42323_c0_g1_i9	1
TRINITY_DN22684_c0_g1_i3	1
TRINITY_DN7750_c0_g1_i37	1
TRINITY_DN18676_c0_g3_i1	1
TRINITY_DN1677_c0_g1_i2	1
TRINITY_DN14432_c0_g1_i5	1
TRINITY_DN1537_c0_g1_i41	1
TRINITY_DN16338_c0_g1_i1	1
TRINITY_DN8532_c0_g1_i16	1
TRINITY_DN2238_c0_g1_i7	1
TRINITY_DN608_c5_g1_i17	1
[truncated: 72,024 more rows]

## Sheet: C1
Contig	Cluster
TRINITY_DN31594_c0_g1_i21	1	ZSWM1	HUMANZinc finger SWIM domain-containing protein 1 OS=Homo sapiens OX=9606 GN=ZSWIM1 PE=2 SV=2
TRINITY_DN15911_c0_g1_i12	1	ZSC9	HUMANZinc finger and SCAN domain-containing protein 9 OS=Homo sapiens OX=9606 GN=ZSCAN9 PE=1 SV=1
TRINITY_DN165_c1_g1_i18	1	ZSC16	HUMANZinc finger and SCAN domain-containing protein 16 OS=Homo sapiens OX=9606 GN=ZSCAN16 PE=1 SV=2
TRINITY_DN22926_c0_g1_i14	1	ZSC16	HUMANZinc finger and SCAN domain-containing protein 16 OS=Homo sapiens OX=9606 GN=ZSCAN16 PE=1 SV=2
TRINITY_DN165_c1_g1_i22	1	ZSC16	HUMANZinc finger and SCAN domain-containing protein 16 OS=Homo sapiens OX=9606 GN=ZSCAN16 PE=1 SV=2
TRINITY_DN165_c1_g1_i27	1	ZSC16	HUMANZinc finger and SCAN domain-containing protein 16 OS=Homo sapiens OX=9606 GN=ZSCAN16 PE=1 SV=2
TRINITY_DN165_c1_g1_i7	1	ZSC16	HUMANZinc finger and SCAN domain-containing protein 16 OS=Homo sapiens OX=9606 GN=ZSCAN16 PE=1 SV=2
TRINITY_DN16653_c0_g1_i7	1	ZRAB2	CHICKZinc finger Ran-binding domain-containing protein 2 OS=Gallus gallus OX=9031 GN=ZRANB2 PE=2 SV=1
TRINITY_DN2590_c0_g1_i27	1	ZPR1	MOUSEZinc finger protein ZPR1 OS=Mus musculus OX=10090 GN=Zpr1 PE=1 SV=1
TRINITY_DN2590_c0_g1_i114	1	ZPR1	MOUSEZinc finger protein ZPR1 OS=Mus musculus OX=10090 GN=Zpr1 PE=1 SV=1
TRINITY_DN2590_c0_g1_i51	1	ZPR1	MOUSEZinc finger protein ZPR1 OS=Mus musculus OX=10090 GN=Zpr1 PE=1 SV=1
TRINITY_DN14644_c0_g1_i7	1	ZP3R	CAVPOZona pellucida sperm-binding protein 3 receptor OS=Cavia porcellus OX=10141 GN=ZP3R PE=1 SV=1
TRINITY_DN14644_c0_g1_i16	1	ZP3R	CAVPOZona pellucida sperm-binding protein 3 receptor OS=Cavia porcellus OX=10141 GN=ZP3R PE=1 SV=1
TRINITY_DN13581_c0_g1_i18	1	ZO3	HUMANTight junction protein ZO-3 OS=Homo sapiens OX=9606 GN=TJP3 PE=1 SV=3
TRINITY_DN32_c2_g1_i5	1	ZO1	MOUSETight junction protein ZO-1 OS=Mus musculus OX=10090 GN=Tjp1 PE=1 SV=2
TRINITY_DN2307_c0_g1_i34	1	ZNT9	DANREZinc transporter 9 OS=Danio rerio OX=7955 GN=slc30a9 PE=2 SV=1
TRINITY_DN2307_c0_g1_i95	1	ZNT9	DANREZinc transporter 9 OS=Danio rerio OX=7955 GN=slc30a9 PE=2 SV=1
TRINITY_DN2307_c0_g1_i117	1	ZNT9	DANREZinc transporter 9 OS=Danio rerio OX=7955 GN=slc30a9 PE=2 SV=1
TRINITY_DN2307_c0_g1_i99	1	ZNT9	DANREZinc transporter 9 OS=Danio rerio OX=7955 GN=slc30a9 PE=2 SV=1
TRINITY_DN9458_c0_g1_i23	1	ZNT6	DANREZinc transporter 6 OS=Danio rerio OX=7955 GN=slc30a6 PE=2 SV=1
TRINITY_DN9458_c0_g1_i29	1	ZNT6	CHICKZinc transporter 6 OS=Gallus gallus OX=9031 GN=SLC30A6 PE=1 SV=1
TRINITY_DN239_c0_g1_i19	1	ZNHI2	MOUSEZinc finger HIT domain-containing protein 2 OS=Mus musculus OX=10090 GN=Znhit2 PE=2 SV=2
TRINITY_DN1266_c0_g1_i7	1	ZNFX1	MOUSENFX1-type zinc finger-containing protein 1 OS=Mus musculus OX=10090 GN=Znfx1 PE=1 SV=3
TRINITY_DN1266_c0_g1_i14	1	ZNFX1	MOUSENFX1-type zinc finger-containing protein 1 OS=Mus musculus OX=10090 GN=Znfx1 PE=1 SV=3
TRINITY_DN30450_c0_g1_i1	1	ZNFX1	HUMANNFX1-type zinc finger-containing protein 1 OS=Homo sapiens OX=9606 GN=ZNFX1 PE=2 SV=2
TRINITY_DN4201_c0_g1_i2	1	ZNFX1	HUMANNFX1-type zinc finger-containing protein 1 OS=Homo sapiens OX=9606 GN=ZNFX1 PE=2 SV=2
TRINITY_DN19071_c0_g1_i3	1	ZNFX1	HUMANNFX1-type zinc finger-containing protein 1 OS=Homo sapiens OX=9606 GN=ZNFX1 PE=2 SV=2
TRINITY_DN1266_c3_g1_i1	1	ZNFX1	HUMANNFX1-type zinc finger-containing protein 1 OS=Homo sapiens OX=9606 GN=ZNFX1 PE=2 SV=2
TRINITY_DN16733_c0_g1_i1	1	ZNFX1	HUMANNFX1-type zinc finger-containing protein 1 OS=Homo sapiens OX=9606 GN=ZNFX1 PE=2 SV=2
TRINITY_DN29038_c0_g1_i1	1	ZN711	DANREZinc finger protein 711 OS=Danio rerio OX=7955 GN=znf711 PE=1 SV=1
TRINITY_DN1427_c0_g1_i5	1	ZN706	CHICKZinc finger protein 706 OS=Gallus gallus OX=9031 GN=ZNF706 PE=3 SV=1
TRINITY_DN1427_c0_g1_i6	1	ZN706	CHICKZinc finger protein 706 OS=Gallus gallus OX=9031 GN=ZNF706 PE=3 SV=1
TRINITY_DN3099_c0_g1_i13	1	ZN609	HUMANZinc finger protein 609 OS=Homo sapiens OX=9606 GN=ZNF609 PE=1 SV=2
TRINITY_DN2224_c1_g1_i5	1	ZN207	XENLABUB3-interacting and GLEBS motif-containing protein ZNF207 OS=Xenopus laevis OX=8355 GN=znf207 PE=1 SV=1
TRINITY_DN5792_c0_g1_i2	1	ZMYM3	MOUSEZinc finger MYM-type protein 3 OS=Mus musculus OX=10090 GN=Zmym3 PE=1 SV=1
TRINITY_DN5792_c0_g1_i11	1	ZMYM3	MOUSEZinc finger MYM-type protein 3 OS=Mus musculus OX=10090 GN=Zmym3 PE=1 SV=1
TRINITY_DN20796_c0_g1_i1	1	ZMYM3	HUMANZinc finger MYM-type protein 3 OS=Homo sapiens OX=9606 GN=ZMYM3 PE=1 SV=2
TRINITY_DN18161_c0_g1_i14	1	ZMYM2	MOUSEZinc finger MYM-type protein 2 OS=Mus musculus OX=10090 GN=Zmym2 PE=1 SV=3
TRINITY_DN13873_c0_g1_i16	1	ZMYM2	HUMANZinc finger MYM-type protein 2 OS=Homo sapiens OX=9606 GN=ZMYM2 PE=1 SV=1
TRINITY_DN20507_c0_g1_i19	1	ZMYM2	HUMANZinc finger MYM-type protein 2 OS=Homo sapiens OX=9606 GN=ZMYM2 PE=1 SV=1
TRINITY_DN105814_c0_g1_i1	1	ZMYM1	HUMANZinc finger MYM-type protein 1 OS=Homo sapiens OX=9606 GN=ZMYM1 PE=1 SV=1
TRINITY_DN3167_c0_g1_i29	1	ZMY12	HUMANZinc finger MYND domain-containing protein 12 OS=Homo sapiens OX=9606 GN=ZMYND12 PE=2 SV=3
TRINITY_DN41_c2_g1_i7	1	ZMIZ1	HUMANZinc finger MIZ domain-containing protein 1 OS=Homo sapiens OX=9606 GN=ZMIZ1 PE=1 SV=3
TRINITY_DN41_c2_g1_i6	1	ZMIZ1	HUMANZinc finger MIZ domain-containing protein 1 OS=Homo sapiens OX=9606 GN=ZMIZ1 PE=1 SV=3
TRINITY_DN13647_c0_g1_i30	1	ZIFL1	ARATHProtein ZINC INDUCED FACILITATOR-LIKE 1 OS=Arabidopsis thaliana OX=3702 GN=ZIFL1 PE=2 SV=1
TRINITY_DN3245_c0_g1_i6	1	ZIFL1	ARATHProtein ZINC INDUCED FACILITATOR-LIKE 1 OS=Arabidopsis thaliana OX=3702 GN=ZIFL1 PE=2 SV=1
TRINITY_DN3245_c0_g1_i35	1	ZIFL1	ARATHProtein ZINC INDUCED FACILITATOR-LIKE 1 OS=Arabidopsis thaliana OX=3702 GN=ZIFL1 PE=2 SV=1
TRINITY_DN1028_c0_g1_i9	1	ZIFL1	ARATHProtein ZINC INDUCED FACILITATOR-LIKE 1 OS=Arabidopsis thaliana OX=3702 GN=ZIFL1 PE=2 SV=1
TRINITY_DN1028_c0_g1_i13	1	ZIF1	ARATHProtein ZINC INDUCED FACILITATOR 1 OS=Arabidopsis thaliana OX=3702 GN=ZIF1 PE=1 SV=2
TRINITY_DN1028_c0_g1_i16	1	ZIF1	ARATHProtein ZINC INDUCED FACILITATOR 1 OS=Arabidopsis thaliana OX=3702 GN=ZIF1 PE=1 SV=2
TRINITY_DN936_c0_g1_i8	1	ZHANG	MOUSECREB/ATF bZIP transcription factor OS=Mus musculus OX=10090 GN=Crebzf PE=1 SV=2
TRINITY_DN3216_c0_g1_i14	1	ZFY21	RATZinc finger FYVE domain-containing protein 21 OS=Rattus norvegicus OX=10116 GN=Zfyve21 PE=3 SV=1
TRINITY_DN3216_c0_g1_i15	1	ZFY21	BOVINZinc finger FYVE domain-containing protein 21 OS=Bos taurus OX=9913 GN=ZFYVE21 PE=2 SV=1
TRINITY_DN39467_c0_g1_i74	1	ZFY	GORGOZinc finger Y-chromosomal protein OS=Gorilla gorilla gorilla OX=9595 GN=ZFY PE=3 SV=1
TRINITY_DN47851_c0_g1_i7	1	ZFR2	HUMANZinc finger RNA-binding protein 2 OS=Homo sapiens OX=9606 GN=ZFR2 PE=2 SV=3
TRINITY_DN47851_c0_g1_i4	1	ZFR	RATZinc finger RNA-binding protein OS=Rattus norvegicus OX=10116 GN=Zfr PE=1 SV=2
TRINITY_DN3549_c0_g1_i2	1	ZFN2B	MOUSEAN1-type zinc finger protein 2B OS=Mus musculus OX=10090 GN=Zfand2b PE=1 SV=1
TRINITY_DN3549_c0_g1_i58	1	ZFN2B	HUMANAN1-type zinc finger protein 2B OS=Homo sapiens OX=9606 GN=ZFAND2B PE=1 SV=1
TRINITY_DN3549_c0_g1_i28	1	ZFN2B	HUMANAN1-type zinc finger protein 2B OS=Homo sapiens OX=9606 GN=ZFAND2B PE=1 SV=1
TRINITY_DN3549_c0_g1_i68	1	ZFN2B	HUMANAN1-type zinc finger protein 2B OS=Homo sapiens OX=9606 GN=ZFAND2B PE=1 SV=1
TRINITY_DN4031_c0_g1_i13	1	ZFAN5	HUMANAN1-type zinc finger protein 5 OS=Homo sapiens OX=9606 GN=ZFAND5 PE=1 SV=1
TRINITY_DN1745_c1_g1_i16	1	ZFAN1	HUMANAN1-type zinc finger protein 1 OS=Homo sapiens OX=9606 GN=ZFAND1 PE=1 SV=1
TRINITY_DN1745_c1_g1_i18	1	ZFAN1	HUMANAN1-type zinc finger protein 1 OS=Homo sapiens OX=9606 GN=ZFAND1 PE=1 SV=1
TRINITY_DN1745_c1_g1_i10	1	ZFAN1	HUMANAN1-type zinc finger protein 1 OS=Homo sapiens OX=9606 GN=ZFAND1 PE=1 SV=1
TRINITY_DN1745_c1_g1_i30	1	ZFAN1	HUMANAN1-type zinc finger protein 1 OS=Homo sapiens OX=9606 GN=ZFAND1 PE=1 SV=1
TRINITY_DN124_c0_g1_i12	1	ZDHC6	HUMANPalmitoyltransferase ZDHHC6 OS=Homo sapiens OX=9606 GN=ZDHHC6 PE=1 SV=1
TRINITY_DN124_c0_g1_i13	1	ZDHC6	HUMANPalmitoyltransferase ZDHHC6 OS=Homo sapiens OX=9606 GN=ZDHHC6 PE=1 SV=1
TRINITY_DN2478_c0_g1_i30	1	ZDHC5	MOUSEPalmitoyltransferase ZDHHC5 OS=Mus musculus OX=10090 GN=Zdhhc5 PE=1 SV=1
TRINITY_DN13595_c0_g1_i2	1	ZDHC3	HUMANPalmitoyltransferase ZDHHC3 OS=Homo sapiens OX=9606 GN=ZDHHC3 PE=1 SV=2
TRINITY_DN124_c1_g1_i6	1	ZDHC2	HUMANPalmitoyltransferase ZDHHC2 OS=Homo sapiens OX=9606 GN=ZDHHC2 PE=1 SV=1
TRINITY_DN1775_c0_g1_i22	1	ZDHC1	MOUSEProbable palmitoyltransferase ZDHHC1 OS=Mus musculus OX=10090 GN=Zdhhc1 PE=2 SV=2
TRINITY_DN4254_c0_g2_i41	1	ZDH17	RATPalmitoyltransferase ZDHHC17 OS=Rattus norvegicus OX=10116 GN=Zdhhc17 PE=1 SV=1
TRINITY_DN21094_c0_g1_i4	1	ZDH13	MOUSEPalmitoyltransferase ZDHHC13 OS=Mus musculus OX=10090 GN=Zdhhc13 PE=1 SV=2
TRINITY_DN22698_c1_g1_i4	1	ZDH13	HUMANPalmitoyltransferase ZDHHC13 OS=Homo sapiens OX=9606 GN=ZDHHC13 PE=1 SV=3
TRINITY_DN22_c0_g1_i22	1	ZD16A	DANREPalmitoyltransferase ZDHHC16A OS=Danio rerio OX=7955 GN=zdhhc16a PE=2 SV=1
TRINITY_DN14087_c0_g1_i9	1	ZCHC4	RATrRNA N6-adenosine-methyltransferase ZCCHC4 OS=Rattus norvegicus OX=10116 GN=Zcchc4 PE=3 SV=1
TRINITY_DN1740_c0_g1_i3	1	ZC3H8	MOUSEZinc finger CCCH domain-containing protein 8 OS=Mus musculus OX=10090 GN=Zc3h8 PE=1 SV=2
TRINITY_DN608_c1_g1_i37	1	ZC3H1	HUMANZinc finger C3H1 domain-containing protein OS=Homo sapiens OX=9606 GN=ZFC3H1 PE=1 SV=3
TRINITY_DN608_c1_g1_i13	1	ZC3H1	HUMANZinc finger C3H1 domain-containing protein OS=Homo sapiens OX=9606 GN=ZFC3H1 PE=1 SV=3
TRINITY_DN3479_c1_g1_i5	1	ZC21A	PONABZinc finger C2HC domain-containing protein 1A OS=Pongo abelii OX=9601 GN=ZC2HC1A PE=2 SV=1
TRINITY_DN1110_c0_g1_i21	1	ZAR1L	BOVINZAR1-like protein OS=Bos taurus OX=9913 GN=ZAR1L PE=2 SV=3
TRINITY_DN1110_c0_g1_i12	1	ZAR1L	BOVINZAR1-like protein OS=Bos taurus OX=9913 GN=ZAR1L PE=2 SV=3
TRINITY_DN114334_c0_g1_i1	1	ZAM	SYNY3Acetazolamide conferring resistance protein zam OS=Synechocystis sp. (strain PCC 6803 / Kazusa) OX=1111708 GN=zam PE=3 SV=1
TRINITY_DN16700_c0_g1_i1	1	ZAK1	DICDIDual specificity protein kinase zakA OS=Dictyostelium discoideum OX=44689 GN=zakA PE=1 SV=1
TRINITY_DN58403_c0_g1_i1	1	YZ37	SYNY3Uncharacterized sugar kinase slr0537 OS=Synechocystis sp. (strain PCC 6803 / Kazusa) OX=1111708 GN=slr0537 PE=3 SV=1
TRINITY_DN123474_c0_g1_i1	1	YYAL	BACSUUncharacterized protein YyaL OS=Bacillus subtilis (strain 168) OX=224308 GN=yyaL PE=4 SV=1
TRINITY_DN7473_c0_g1_i3	1	YY42	CAEELGlycosyltransferase family 92 protein C33H5.2 OS=Caenorhabditis elegans OX=6239 GN=C33H5.2 PE=3 SV=1
TRINITY_DN204_c0_g1_i15	1	YWTG	BACSUPutative metabolite transport protein YwtG OS=Bacillus subtilis (strain 168) OX=224308 GN=ywtG PE=3 SV=1
TRINITY_DN916_c0_g1_i19	1	YWTG	BACSUPutative metabolite transport protein YwtG OS=Bacillus subtilis (strain 168) OX=224308 GN=ywtG PE=3 SV=1
TRINITY_DN916_c0_g1_i1	1	YWTG	BACSUPutative metabolite transport protein YwtG OS=Bacillus subtilis (strain 168) OX=224308 GN=ywtG PE=3 SV=1
TRINITY_DN115220_c0_g1_i1	1	YWQD	BACSUTyrosine-protein kinase YwqD OS=Bacillus subtilis (strain 168) OX=224308 GN=ywqD PE=1 SV=1
TRINITY_DN64567_c0_g1_i1	1	YWPD	BACSUPutative uncharacterized protein YwpD OS=Bacillus subtilis (strain 168) OX=224308 GN=ywpD PE=5 SV=1
TRINITY_DN5591_c0_g1_i9	1	YVDP	BACSUUncharacterized FAD-linked oxidoreductase YvdP OS=Bacillus subtilis (strain 168) OX=224308 GN=yvdP PE=1 SV=1
TRINITY_DN5591_c0_g1_i5	1	YVDP	BACSUUncharacterized FAD-linked oxidoreductase YvdP OS=Bacillus subtilis (strain 168) OX=224308 GN=yvdP PE=1 SV=1
TRINITY_DN69732_c0_g1_i1	1	YUFP	BACSUUncharacterized ABC transporter permease protein YufP OS=Bacillus subtilis (strain 168) OX=224308 GN=yufP PE=3 SV=1
TRINITY_DN17219_c0_g1_i6	1	YUFN	BACSUUncharacterized lipoprotein YufN OS=Bacillus subtilis (strain 168) OX=224308 GN=yufN PE=3 SV=2
TRINITY_DN91176_c0_g1_i1	1	YUFN	BACSUUncharacterized lipoprotein YufN OS=Bacillus subtilis (strain 168) OX=224308 GN=yufN PE=3 SV=2
TRINITY_DN542_c0_g1_i16	1	YTBE	BACSUUncharacterized oxidoreductase YtbE OS=Bacillus subtilis (strain 168) OX=224308 GN=ytbE PE=1 SV=1
TRINITY_DN18130_c0_g1_i4	1	YSMU	CAEELUncharacterized protein F13E9.13, mitochondrial OS=Caenorhabditis elegans OX=6239 GN=F13E9.13 PE=3 SV=1
TRINITY_DN18130_c0_g1_i102	1	YSMU	CAEELUncharacterized protein F13E9.13, mitochondrial OS=Caenorhabditis elegans OX=6239 GN=F13E9.13 PE=3 SV=1
TRINITY_DN18130_c0_g1_i112	1	YSMU	CAEELUncharacterized protein F13E9.13, mitochondrial OS=Caenorhabditis elegans OX=6239 GN=F13E9.13 PE=3 SV=1
TRINITY_DN5297_c0_g1_i12	1	YSDA	BACSUUncharacterized protein YsdA OS=Bacillus subtilis (strain 168) OX=224308 GN=ysdA PE=4 SV=1
TRINITY_DN5297_c0_g1_i1	1	YSDA	BACSUUncharacterized protein YsdA OS=Bacillus subtilis (strain 168) OX=224308 GN=ysdA PE=4 SV=1
TRINITY_DN80267_c0_g1_i1	1	YSCJ	YERENYop proteins translocation lipoprotein J OS=Yersinia enterocolitica OX=630 GN=yscJ PE=2 SV=1
TRINITY_DN2926_c0_g1_i5	1	YS11	DROMEPutative gamma-glutamylcyclotransferase CG2811 OS=Drosophila melanogaster OX=7227 GN=CG2811 PE=2 SV=2
TRINITY_DN3800_c0_g1_i1	1	YRDC	RATYrdC domain-containing protein, mitochondrial OS=Rattus norvegicus OX=10116 GN=Yrdc PE=2 SV=1
TRINITY_DN13065_c0_g2_i2	1	YRD6	CAEELUncharacterized protein K02A2.6 OS=Caenorhabditis elegans OX=6239 GN=K02A2.6 PE=4 SV=1
TRINITY_DN10414_c0_g1_i1	1	YRD6	CAEELUncharacterized protein K02A2.6 OS=Caenorhabditis elegans OX=6239 GN=K02A2.6 PE=4 SV=1
TRINITY_DN12317_c1_g1_i1	1	YRD6	CAEELUncharacterized protein K02A2.6 OS=Caenorhabditis elegans OX=6239 GN=K02A2.6 PE=4 SV=1
TRINITY_DN3546_c0_g1_i10	1	YRD6	CAEELUncharacterized protein K02A2.6 OS=Caenorhabditis elegans OX=6239 GN=K02A2.6 PE=4 SV=1
TRINITY_DN16135_c0_g1_i5	1	YRD6	CAEELUncharacterized protein K02A2.6 OS=Caenorhabditis elegans OX=6239 GN=K02A2.6 PE=4 SV=1
TRINITY_DN743_c1_g1_i18	1	YRD6	CAEELUncharacterized protein K02A2.6 OS=Caenorhabditis elegans OX=6239 GN=K02A2.6 PE=4 SV=1
TRINITY_DN2861_c0_g1_i11	1	YRD6	CAEELUncharacterized protein K02A2.6 OS=Caenorhabditis elegans OX=6239 GN=K02A2.6 PE=4 SV=1
TRINITY_DN3546_c0_g1_i7	1	YRD6	CAEELUncharacterized protein K02A2.6 OS=Caenorhabditis elegans OX=6239 GN=K02A2.6 PE=4 SV=1
TRINITY_DN743_c1_g1_i6	1	YRD6	CAEELUncharacterized protein K02A2.6 OS=Caenorhabditis elegans OX=6239 GN=K02A2.6 PE=4 SV=1
TRINITY_DN9174_c0_g1_i4	1	YRD6	CAEELUncharacterized protein K02A2.6 OS=Caenorhabditis elegans OX=6239 GN=K02A2.6 PE=4 SV=1
TRINITY_DN28842_c0_g2_i2	1	YRD6	CAEELUncharacterized protein K02A2.6 OS=Caenorhabditis elegans OX=6239 GN=K02A2.6 PE=4 SV=1
TRINITY_DN13583_c0_g1_i3	1	YRD6	CAEELUncharacterized protein K02A2.6 OS=Caenorhabditis elegans OX=6239 GN=K02A2.6 PE=4 SV=1
TRINITY_DN207_c0_g1_i16	1	YRD6	CAEELUncharacterized protein K02A2.6 OS=Caenorhabditis elegans OX=6239 GN=K02A2.6 PE=4 SV=1
TRINITY_DN21135_c0_g1_i3	1	YRD6	CAEELUncharacterized protein K02A2.6 OS=Caenorhabditis elegans OX=6239 GN=K02A2.6 PE=4 SV=1
TRINITY_DN207_c0_g1_i30	1	YRD6	CAEELUncharacterized protein K02A2.6 OS=Caenorhabditis elegans OX=6239 GN=K02A2.6 PE=4 SV=1
TRINITY_DN10414_c0_g2_i1	1	YRD6	CAEELUncharacterized protein K02A2.6 OS=Caenorhabditis elegans OX=6239 GN=K02A2.6 PE=4 SV=1
TRINITY_DN306_c0_g1_i2	1	YRD6	CAEELUncharacterized protein K02A2.6 OS=Caenorhabditis elegans OX=6239 GN=K02A2.6 PE=4 SV=1
TRINITY_DN207_c0_g1_i10	1	YRD6	CAEELUncharacterized protein K02A2.6 OS=Caenorhabditis elegans OX=6239 GN=K02A2.6 PE=4 SV=1
TRINITY_DN207_c0_g1_i11	1	YRD6	CAEELUncharacterized protein K02A2.6 OS=Caenorhabditis elegans OX=6239 GN=K02A2.6 PE=4 SV=1
TRINITY_DN34542_c0_g1_i4	1	YRD6	CAEELUncharacterized protein K02A2.6 OS=Caenorhabditis elegans OX=6239 GN=K02A2.6 PE=4 SV=1
TRINITY_DN10610_c0_g1_i74	1	YRD6	CAEELUncharacterized protein K02A2.6 OS=Caenorhabditis elegans OX=6239 GN=K02A2.6 PE=4 SV=1
TRINITY_DN3546_c0_g1_i8	1	YRD6	CAEELUncharacterized protein K02A2.6 OS=Caenorhabditis elegans OX=6239 GN=K02A2.6 PE=4 SV=1
TRINITY_DN20527_c0_g1_i18	1	YRD6	CAEELUncharacterized protein K02A2.6 OS=Caenorhabditis elegans OX=6239 GN=K02A2.6 PE=4 SV=1
TRINITY_DN40552_c0_g2_i2	1	YRD6	CAEELUncharacterized protein K02A2.6 OS=Caenorhabditis elegans OX=6239 GN=K02A2.6 PE=4 SV=1
TRINITY_DN2266_c1_g1_i43	1	YRD6	CAEELUncharacterized protein K02A2.6 OS=Caenorhabditis elegans OX=6239 GN=K02A2.6 PE=4 SV=1
TRINITY_DN14737_c0_g1_i4	1	YRD6	CAEELUncharacterized protein K02A2.6 OS=Caenorhabditis elegans OX=6239 GN=K02A2.6 PE=4 SV=1
TRINITY_DN207_c0_g1_i15	1	YRD6	CAEELUncharacterized protein K02A2.6 OS=Caenorhabditis elegans OX=6239 GN=K02A2.6 PE=4 SV=1
TRINITY_DN743_c1_g1_i16	1	YRD6	CAEELUncharacterized protein K02A2.6 OS=Caenorhabditis elegans OX=6239 GN=K02A2.6 PE=4 SV=1
TRINITY_DN34362_c3_g1_i1	1	YRD6	CAEELUncharacterized protein K02A2.6 OS=Caenorhabditis elegans OX=6239 GN=K02A2.6 PE=4 SV=1
TRINITY_DN37772_c0_g1_i1	1	YRD6	CAEELUncharacterized protein K02A2.6 OS=Caenorhabditis elegans OX=6239 GN=K02A2.6 PE=4 SV=1
TRINITY_DN5574_c0_g1_i10	1	YRD6	CAEELUncharacterized protein K02A2.6 OS=Caenorhabditis elegans OX=6239 GN=K02A2.6 PE=4 SV=1
TRINITY_DN20269_c0_g3_i1	1	YRD6	CAEELUncharacterized protein K02A2.6 OS=Caenorhabditis elegans OX=6239 GN=K02A2.6 PE=4 SV=1
TRINITY_DN12848_c0_g1_i48	1	YRD6	CAEELUncharacterized protein K02A2.6 OS=Caenorhabditis elegans OX=6239 GN=K02A2.6 PE=4 SV=1
TRINITY_DN22651_c0_g1_i10	1	YRD6	CAEELUncharacterized protein K02A2.6 OS=Caenorhabditis elegans OX=6239 GN=K02A2.6 PE=4 SV=1
TRINITY_DN37894_c0_g1_i1	1	YRD6	CAEELUncharacterized protein K02A2.6 OS=Caenorhabditis elegans OX=6239 GN=K02A2.6 PE=4 SV=1
TRINITY_DN21135_c0_g1_i1	1	YRD6	CAEELUncharacterized protein K02A2.6 OS=Caenorhabditis elegans OX=6239 GN=K02A2.6 PE=4 SV=1
TRINITY_DN17170_c0_g1_i14	1	YRD6	CAEELUncharacterized protein K02A2.6 OS=Caenorhabditis elegans OX=6239 GN=K02A2.6 PE=4 SV=1
TRINITY_DN7174_c0_g2_i4	1	YRD6	CAEELUncharacterized protein K02A2.6 OS=Caenorhabditis elegans OX=6239 GN=K02A2.6 PE=4 SV=1
TRINITY_DN28626_c1_g2_i17	1	YRD6	CAEELUncharacterized protein K02A2.6 OS=Caenorhabditis elegans OX=6239 GN=K02A2.6 PE=4 SV=1
TRINITY_DN87843_c0_g1_i1	1	YRBG	ECOLIInner membrane protein YrbG OS=Escherichia coli (strain K12) OX=83333 GN=yrbG PE=1 SV=1
TRINITY_DN574_c1_g1_i22	1	YR831	MIMIVPutative serine/threonine-protein kinase/receptor R831 OS=Acanthamoeba polyphaga mimivirus OX=212035 GN=MIMI
TRINITY_DN9769_c0_g1_i3	1	YR826	MIMIVPutative serine/threonine-protein kinase/receptor R826 OS=Acanthamoeba polyphaga mimivirus OX=212035 GN=MIMI
TRINITY_DN26842_c0_g1_i1	1	YR818	MIMIVPutative serine/threonine-protein kinase/receptor R818 OS=Acanthamoeba polyphaga mimivirus OX=212035 GN=MIMI
TRINITY_DN30336_c0_g1_i18	1	YQMA	SCHPOAnkyrin repeat-containing protein P1E11.10 OS=Schizosaccharomyces pombe (strain 972 / ATCC 24843) OX=284812 GN=SPCP1E11.10 PE=4 SV=1
TRINITY_DN30336_c0_g1_i1	1	YQMA	SCHPOAnkyrin repeat-containing protein P1E11.10 OS=Schizosaccharomyces pombe (strain 972 / ATCC 24843) OX=284812 GN=SPCP1E11.10 PE=4 SV=1
TRINITY_DN1648_c0_g1_i17	1	YQK1	SCHPOUPF0676 protein C1494.01 OS=Schizosaccharomyces pombe (strain 972 / ATCC 24843) OX=284812 GN=SPCC1494.01 PE=3 SV=2
TRINITY_DN1559_c0_g1_i20	1	YQJG	ECOLIGlutathionyl-hydroquinone reductase YqjG OS=Escherichia coli (strain K12) OX=83333 GN=yqjG PE=1 SV=1
TRINITY_DN1428_c0_g1_i2	1	YQJG	ECOLIGlutathionyl-hydroquinone reductase YqjG OS=Escherichia coli (strain K12) OX=83333 GN=yqjG PE=1 SV=1
TRINITY_DN1428_c0_g1_i16	1	YQJG	ECOLIGlutathionyl-hydroquinone reductase YqjG OS=Escherichia coli (strain K12) OX=83333 GN=yqjG PE=1 SV=1
TRINITY_DN1428_c0_g1_i11	1	YQJG	ECOLIGlutathionyl-hydroquinone reductase YqjG OS=Escherichia coli (strain K12) OX=83333 GN=yqjG PE=1 SV=1
TRINITY_DN1428_c0_g1_i22	1	YQJG	ECOLIGlutathionyl-hydroquinone reductase YqjG OS=Escherichia coli (strain K12) OX=83333 GN=yqjG PE=1 SV=1
TRINITY_DN1428_c0_g1_i28	1	YQJG	ECOLIGlutathionyl-hydroquinone reductase YqjG OS=Escherichia coli (strain K12) OX=83333 GN=yqjG PE=1 SV=1
TRINITY_DN1428_c0_g1_i9	1	YQJG	ECOLIGlutathionyl-hydroquinone reductase YqjG OS=Escherichia coli (strain K12) OX=83333 GN=yqjG PE=1 SV=1
TRINITY_DN1428_c0_g1_i12	1	YQJG	ECOLIGlutathionyl-hydroquinone reductase YqjG OS=Escherichia coli (strain K12) OX=83333 GN=yqjG PE=1 SV=1
TRINITY_DN67144_c0_g1_i1	1	YQBE	BACSUUncharacterized protein YqbE OS=Bacillus subtilis (strain 168) OX=224308 GN=yqbE PE=4 SV=2
TRINITY_DN1901_c0_g1_i16	1	YPTC6	CHLRERas-related protein YPTC6 OS=Chlamydomonas reinhardtii OX=3055 GN=YPTC6 PE=3 SV=1
TRINITY_DN21262_c0_g1_i1	1	YPQQ	PSEPHHydrolase in pqqF 5'region OS=Pseudomonas protegens (strain DSM 19095 / LMG 27888 / CHA0) OX=1124983 PE=3 SV=1
TRINITY_DN2257_c1_g1_i1	1	YPQQ	PSEPHHydrolase in pqqF 5'region OS=Pseudomonas protegens (strain DSM 19095 / LMG 27888 / CHA0) OX=1124983 PE=3 SV=1
TRINITY_DN1612_c0_g1_i8	1	YPD1	CAEELUncharacterized protein C05D11.1 OS=Caenorhabditis elegans OX=6239 GN=C05D11.1 PE=4 SV=2
TRINITY_DN3923_c0_g1_i6	1	YOW5	SCHPOPseudouridine-metabolizing bifunctional protein C1861.05 OS=Schizosaccharomyces pombe (strain 972 / ATCC 24843) OX=284812 GN=SPBC1861.05 PE=3 SV=1
TRINITY_DN32395_c0_g1_i4	1	YORF	SCHPOUncharacterized RING finger protein P8B7.15c OS=Schizosaccharomyces pombe (strain 972 / ATCC 24843) OX=284812 GN=SPBP8B7.15c PE=4 SV=1
TRINITY_DN1653_c0_g1_i43	1	YNS9	SCHPOUncharacterized protein C18H10.09 OS=Schizosaccharomyces pombe (strain 972 / ATCC 24843) OX=284812 GN=SPBC18H10.09 PE=4 SV=2
TRINITY_DN146_c2_g1_i11	1	YNG2	KLULAChromatin modification-related protein YNG2 OS=Kluyveromyces lactis (strain ATCC 8585 / CBS 2359 / DSM 70799 / NBRC 1267 / NRRL Y-1140 / WM37) OX=284590 GN=YNG2 PE=3 SV=1
TRINITY_DN136067_c0_g1_i1	1	YMF16	NEPOLUncharacterized tatC-like protein ymf16 OS=Nephroselmis olivacea OX=31312 GN=YMF16 PE=3 SV=1
TRINITY_DN80473_c0_g1_i1	1	YMF16	NEPOLUncharacterized tatC-like protein ymf16 OS=Nephroselmis olivacea OX=31312 GN=YMF16 PE=3 SV=1
TRINITY_DN69188_c0_g1_i1	1	YMC6	SCHPOUncharacterized 91 kDa protein in cob intron OS=Schizosaccharomyces pombe (strain 972 / ATCC 24843) OX=284812 GN=SPMIT.06 PE=4 SV=4
TRINITY_DN2377_c0_g1_i5	1	YLPM1	HUMANYLP motif-containing protein 1 OS=Homo sapiens OX=9606 GN=YLPM1 PE=1 SV=4
TRINITY_DN2377_c0_g1_i104	1	YLPM1	HUMANYLP motif-containing protein 1 OS=Homo sapiens OX=9606 GN=YLPM1 PE=1 SV=4
TRINITY_DN25596_c0_g1_i1	1	YL673	MIMIVPutative serine/threonine-protein kinase L673 OS=Acanthamoeba polyphaga mimivirus OX=212035 GN=MIMI
TRINITY_DN46318_c0_g1_i1	1	YL	DROMEPutative vitellogenin receptor OS=Drosophila melanogaster OX=7227 GN=yl PE=1 SV=2
TRINITY_DN128977_c0_g1_i1	1	YKUD	BACSKPutative L,D-transpeptidase YkuD OS=Bacillus clausii (strain KSM-K16) OX=66692 GN=ABC3535 PE=3 SV=1
TRINITY_DN20336_c0_g1_i13	1	YKU5	SCHPOUncharacterized WD repeat-containing protein C2E1P5.05 OS=Schizosaccharomyces pombe (strain 972 / ATCC 24843) OX=284812 GN=SPAC2E1P5.05 PE=4 SV=1
TRINITY_DN13199_c0_g1_i25	1	YKT6	HUMANSynaptobrevin homolog YKT6 OS=Homo sapiens OX=9606 GN=YKT6 PE=1 SV=1
TRINITY_DN102643_c0_g1_i1	1	YKPA	BACSUUncharacterized ABC transporter ATP-binding protein YkpA OS=Bacillus subtilis (strain 168) OX=224308 GN=ykpA PE=3 SV=1
TRINITY_DN5591_c0_g1_i6	1	YKIC	SCHPOUncharacterized protein C630.12 OS=Schizosaccharomyces pombe (strain 972 / ATCC 24843) OX=284812 GN=SPAC630.12 PE=3 SV=1
TRINITY_DN23952_c0_g1_i1	1	YJU2	MOUSESplicing factor YJU2 OS=Mus musculus OX=10090 GN=Yju2 PE=1 SV=1
TRINITY_DN134486_c0_g1_i1	1	YJCD	SCHPOUncharacterized oxidoreductase C736.13 OS=Schizosaccharomyces pombe (strain 972 / ATCC 24843) OX=284812 GN=SPCC736.13 PE=3 SV=1
TRINITY_DN6895_c0_g1_i3	1	YJ2I	SCHPOUncharacterized protein C4B3.18 OS=Schizosaccharomyces pombe (strain 972 / ATCC 24843) OX=284812 GN=SPCC4B3.18 PE=3 SV=1
TRINITY_DN1166_c0_g1_i51	1	YIPF6	DANREProtein YIPF6 OS=Danio rerio OX=7955 GN=yipf6 PE=2 SV=1
TRINITY_DN1166_c0_g1_i22	1	YIPF6	DANREProtein YIPF6 OS=Danio rerio OX=7955 GN=yipf6 PE=2 SV=1
TRINITY_DN1237_c0_g1_i88	1	YIPF5	RATProtein YIPF5 OS=Rattus norvegicus OX=10116 GN=Yipf5 PE=2 SV=1
TRINITY_DN3717_c0_g1_i1	1	YIF1B	DANREProtein YIF1B OS=Danio rerio OX=7955 GN=yif1b PE=2 SV=2
TRINITY_DN58970_c0_g1_i1	1	YIDC	SYNPXMembrane protein insertase YidC OS=Synechococcus sp. (strain WH8102) OX=84588 GN=yidC PE=3 SV=1
TRINITY_DN21733_c0_g1_i1	1	YI31B	YEASTTransposon Ty3-I Gag-Pol polyprotein OS=Saccharomyces cerevisiae (strain ATCC 204508 / S288c) OX=559292 GN=TY3B-I PE=1 SV=2
TRINITY_DN27532_c0_g1_i14	1	YI31B	YEASTTransposon Ty3-I Gag-Pol polyprotein OS=Saccharomyces cerevisiae (strain ATCC 204508 / S288c) OX=559292 GN=TY3B-I PE=1 SV=2
TRINITY_DN5671_c0_g1_i15	1	YI31B	YEASTTransposon Ty3-I Gag-Pol polyprotein OS=Saccharomyces cerevisiae (strain ATCC 204508 / S288c) OX=559292 GN=TY3B-I PE=1 SV=2
TRINITY_DN9363_c0_g1_i1	1	YI31B	YEASTTransposon Ty3-I Gag-Pol polyprotein OS=Saccharomyces cerevisiae (strain ATCC 204508 / S288c) OX=559292 GN=TY3B-I PE=1 SV=2
TRINITY_DN165_c1_g1_i24	1	YI31B	YEASTTransposon Ty3-I Gag-Pol polyprotein OS=Saccharomyces cerevisiae (strain ATCC 204508 / S288c) OX=559292 GN=TY3B-I PE=1 SV=2
TRINITY_DN5671_c0_g1_i5	1	YI31B	YEASTTransposon Ty3-I Gag-Pol polyprotein OS=Saccharomyces cerevisiae (strain ATCC 204508 / S288c) OX=559292 GN=TY3B-I PE=1 SV=2
TRINITY_DN9363_c0_g1_i6	1	YI31B	YEASTTransposon Ty3-I Gag-Pol polyprotein OS=Saccharomyces cerevisiae (strain ATCC 204508 / S288c) OX=559292 GN=TY3B-I PE=1 SV=2
TRINITY_DN29612_c0_g1_i1	1	YI31B	YEASTTransposon Ty3-I Gag-Pol polyprotein OS=Saccharomyces cerevisiae (strain ATCC 204508 / S288c) OX=559292 GN=TY3B-I PE=1 SV=2
TRINITY_DN165_c1_g1_i13	1	YI31B	YEASTTransposon Ty3-I Gag-Pol polyprotein OS=Saccharomyces cerevisiae (strain ATCC 204508 / S288c) OX=559292 GN=TY3B-I PE=1 SV=2
TRINITY_DN165_c1_g1_i14	1	YI31B	YEASTTransposon Ty3-I Gag-Pol polyprotein OS=Saccharomyces cerevisiae (strain ATCC 204508 / S288c) OX=559292 GN=TY3B-I PE=1 SV=2
TRINITY_DN165_c1_g1_i33	1	YI31B	YEASTTransposon Ty3-I Gag-Pol polyprotein OS=Saccharomyces cerevisiae (strain ATCC 204508 / S288c) OX=559292 GN=TY3B-I PE=1 SV=2
TRINITY_DN2861_c0_g1_i27	1	YI31B	YEASTTransposon Ty3-I Gag-Pol polyprotein OS=Saccharomyces cerevisiae (strain ATCC 204508 / S288c) OX=559292 GN=TY3B-I PE=1 SV=2
TRINITY_DN144222_c0_g1_i1	1	YHDX	ECOLIPutative amino-acid ABC transporter permease protein YhdX OS=Escherichia coli (strain K12) OX=83333 GN=yhdX PE=3 SV=3
TRINITY_DN5671_c0_g1_i21	1	YG31B	YEASTTransposon Ty3-G Gag-Pol polyprotein OS=Saccharomyces cerevisiae (strain ATCC 204508 / S288c) OX=559292 GN=TY3B-G PE=1 SV=3
TRINITY_DN10827_c0_g1_i42	1	YG31B	YEASTTransposon Ty3-G Gag-Pol polyprotein OS=Saccharomyces cerevisiae (strain ATCC 204508 / S288c) OX=559292 GN=TY3B-G PE=1 SV=3
TRINITY_DN11848_c0_g1_i5	1	YFLP	BACSUUPF0065 protein YflP OS=Bacillus subtilis (strain 168) OX=224308 GN=yflP PE=3 SV=2
TRINITY_DN90224_c0_g1_i1	1	YFLP	BACSUUPF0065 protein YflP OS=Bacillus subtilis (strain 168) OX=224308 GN=yflP PE=3 SV=2
TRINITY_DN7397_c1_g1_i6	1	YFEX	ECO57Dye-decolorizing peroxidase YfeX OS=Escherichia coli O157:H7 OX=83334 GN=yfeX PE=1 SV=2
TRINITY_DN114478_c0_g1_i1	1	YFAL	ECOLIProbable autotransporter YfaL OS=Escherichia coli (strain K12) OX=83333 GN=yfaL PE=1 SV=2
TRINITY_DN4580_c0_g1_i1	1	YEY2	YEASTUncharacterized protein YER152C OS=Saccharomyces cerevisiae (strain ATCC 204508 / S288c) OX=559292 GN=YER152C PE=1 SV=2
TRINITY_DN5902_c0_g2_i1	1	YETS2	MOUSEYEATS domain-containing protein 2 OS=Mus musculus OX=10090 GN=Yeats2 PE=1 SV=2
TRINITY_DN24629_c1_g1_i1	1	YEHZ	ECOLIGlycine betaine-binding protein YehZ OS=Escherichia coli (strain K12) OX=83333 GN=yehZ PE=1 SV=1
TRINITY_DN78775_c0_g1_i1	1	YDYA	SCHPOUncharacterized protein C11E3.10 OS=Schizosaccharomyces pombe (strain 972 / ATCC 24843) OX=284812 GN=SPAC11E3.10 PE=4 SV=2
TRINITY_DN105974_c0_g1_i2	1	YCX1	CHLMOUncharacterized 38.5 kDa protein in psbA intron 1 OS=Chlamydomonas moewusii OX=3054 PE=4 SV=1
TRINITY_DN41471_c0_g1_i2	1	YCU1	YEASTAnkyrin repeat-containing protein YCR051W OS=Saccharomyces cerevisiae (strain ATCC 204508 / S288c) OX=559292 GN=YCR051W PE=1 SV=1
TRINITY_DN15313_c1_g2_i1	1	YCU1	YEASTAnkyrin repeat-containing protein YCR051W OS=Saccharomyces cerevisiae (strain ATCC 204508 / S288c) OX=559292 GN=YCR051W PE=1 SV=1
TRINITY_DN29501_c0_g1_i1	1	YCU1	YEASTAnkyrin repeat-containing protein YCR051W OS=Saccharomyces cerevisiae (strain ATCC 204508 / S288c) OX=559292 GN=YCR051W PE=1 SV=1
TRINITY_DN25280_c0_g3_i13	1	YCU1	YEASTAnkyrin repeat-containing protein YCR051W OS=Saccharomyces cerevisiae (strain ATCC 204508 / S288c) OX=559292 GN=YCR051W PE=1 SV=1
TRINITY_DN126740_c0_g1_i1	1	YCF78	CHLVUUncharacterized membrane protein ycf78 OS=Chlorella vulgaris OX=3077 GN=ycf78 PE=3 SV=1
TRINITY_DN80345_c0_g1_i1	1	YCF66	TRICVUncharacterized protein ycf66 OS=Trieres chinensis OX=1514140 GN=ycf66 PE=3 SV=1
TRINITY_DN61685_c0_g1_i1	1	YCF42	PYRYEPutative peroxiredoxin ycf42 OS=Pyropia yezoensis OX=2788 GN=ycf42 PE=3 SV=1
TRINITY_DN136785_c0_g1_i1	1	YCF42	PORPUPutative peroxiredoxin ycf42 OS=Porphyra purpurea OX=2787 GN=ycf42 PE=3 SV=1
TRINITY_DN37904_c0_g1_i1	1	YCF4	THAPSPhotosystem I assembly protein Ycf4 OS=Thalassiosira pseudonana OX=35128 GN=ycf4 PE=3 SV=1
TRINITY_DN2914_c0_g1_i2	1	YCF4	PHATCPhotosystem I assembly protein Ycf4 OS=Phaeodactylum tricornutum (strain CCAP 1055/1) OX=556484 GN=ycf4 PE=3 SV=1
TRINITY_DN2914_c0_g1_i6	1	YCF4	PHATCPhotosystem I assembly protein Ycf4 OS=Phaeodactylum tricornutum (strain CCAP 1055/1) OX=556484 GN=ycf4 PE=3 SV=1
TRINITY_DN133581_c0_g1_i1	1	YCF4	OLTVIPhotosystem I assembly protein Ycf4 OS=Oltmannsiellopsis viridis OX=51324 GN=ycf4 PE=3 SV=1
TRINITY_DN63328_c0_g1_i1	1	YCF39	CYAPAUncharacterized protein ycf39 OS=Cyanophora paradoxa OX=2762 GN=ycf39 PE=3 SV=1
TRINITY_DN125063_c0_g1_i1	1	YCF3	STIHEPhotosystem I assembly protein Ycf3 OS=Stigeoclonium helveticum OX=55999 GN=ycf3 PE=3 SV=1
TRINITY_DN120600_c0_g1_i1	1	YCF23	PYRYEUncharacterized protein ycf23 OS=Pyropia yezoensis OX=2788 GN=ycf23 PE=3 SV=1
TRINITY_DN58265_c0_g1_i1	1	YCF17	CYAPAUncharacterized protein ycf17 OS=Cyanophora paradoxa OX=2762 GN=ycf17 PE=3 SV=1
TRINITY_DN100107_c0_g1_i1	1	YCF17	CYAPAUncharacterized protein ycf17 OS=Cyanophora paradoxa OX=2762 GN=ycf17 PE=3 SV=1
TRINITY_DN41614_c0_g1_i1	1	YCF12	SYNPXPhotosystem II reaction center protein Ycf12 OS=Synechococcus sp. (strain WH8102) OX=84588 GN=ycf12 PE=3 SV=1
TRINITY_DN57714_c0_g1_i1	1	YCCM	ECOLIPutative electron transport protein YccM OS=Escherichia coli (strain K12) OX=83333 GN=yccM PE=1 SV=2
TRINITY_DN61443_c0_g1_i1	1	YCCA	ECOL6Inner membrane protein YccA OS=Escherichia coli O6:H1 (strain CFT073 / ATCC 700928 / UPEC) OX=199310 GN=yccA PE=3 SV=1
TRINITY_DN5185_c0_g1_i8	1	YC91	CAEELUncharacterized MFS-type transporter C09D4.1 OS=Caenorhabditis elegans OX=6239 GN=C09D4.1 PE=3 SV=2
TRINITY_DN2782_c0_g1_i29	1	YC91	CAEELUncharacterized MFS-type transporter C09D4.1 OS=Caenorhabditis elegans OX=6239 GN=C09D4.1 PE=3 SV=2
TRINITY_DN2900_c0_g1_i4	1	YC006	HUMANUncharacterized protein FLJ43738 OS=Homo sapiens OX=9606 PE=2 SV=1
TRINITY_DN17051_c1_g1_i31	1	YBOXH	APLCAY-box factor homolog OS=Aplysia californica OX=6500 PE=2 SV=1
TRINITY_DN17051_c1_g1_i8	1	YBOX1	XENLAY-box-binding protein 1 OS=Xenopus laevis OX=8355 GN=ybx1 PE=2 SV=1
TRINITY_DN15404_c0_g1_i2	1	YBEY	HUMANEndoribonuclease YbeY OS=Homo sapiens OX=9606 GN=YBEY PE=1 SV=2
TRINITY_DN5234_c0_g1_i9	1	YBAI	SCHPOUncharacterized protein C119.18 OS=Schizosaccharomyces pombe (strain 972 / ATCC 24843) OX=284812 GN=SPBC119.18 PE=3 SV=1
TRINITY_DN22688_c0_g1_i35	1	YAJO	ECOLI1-deoxyxylulose-5-phosphate synthase YajO OS=Escherichia coli (strain K12) OX=83333 GN=yajO PE=1 SV=2
TRINITY_DN6397_c1_g1_i13	1	YAHD	ECOLIPutative ankyrin repeat protein YahD OS=Escherichia coli (strain K12) OX=83333 GN=yahD PE=4 SV=1
TRINITY_DN19035_c0_g1_i4	1	Y9963	DICDIProbable serine/threonine-protein kinase DDB
TRINITY_DN19035_c0_g1_i3	1	Y9963	DICDIProbable serine/threonine-protein kinase DDB
TRINITY_DN45648_c0_g1_i6	1	Y9955	DICDIProbable serine/threonine-protein kinase DDB
TRINITY_DN11403_c0_g1_i10	1	Y9899	DICDIUncharacterized protein DDB
TRINITY_DN487_c0_g1_i13	1	Y9871	DICDIProbable serine/threonine-protein kinase DDB
TRINITY_DN18772_c0_g1_i5	1	Y9871	DICDIProbable serine/threonine-protein kinase DDB
TRINITY_DN12095_c0_g3_i1	1	Y9871	DICDIProbable serine/threonine-protein kinase DDB
TRINITY_DN487_c0_g1_i11	1	Y9871	DICDIProbable serine/threonine-protein kinase DDB
TRINITY_DN579_c0_g1_i17	1	Y9871	DICDIProbable serine/threonine-protein kinase DDB
TRINITY_DN967_c2_g1_i6	1	Y9871	DICDIProbable serine/threonine-protein kinase DDB
TRINITY_DN487_c0_g1_i32	1	Y9871	DICDIProbable serine/threonine-protein kinase DDB
TRINITY_DN13625_c0_g1_i2	1	Y9866	DICDIProbable serine/threonine-protein kinase DDB
TRINITY_DN5873_c0_g1_i10	1	Y9863	DICDIProbable serine/threonine-protein kinase DDB
TRINITY_DN8043_c2_g1_i3	1	Y9863	DICDIProbable serine/threonine-protein kinase DDB
TRINITY_DN5873_c0_g1_i9	1	Y9863	DICDIProbable serine/threonine-protein kinase DDB
TRINITY_DN13251_c0_g1_i2	1	Y9863	DICDIProbable serine/threonine-protein kinase DDB
TRINITY_DN851_c1_g1_i2	1	Y9863	DICDIProbable serine/threonine-protein kinase DDB
TRINITY_DN14144_c0_g1_i1	1	Y9863	DICDIProbable serine/threonine-protein kinase DDB
TRINITY_DN945_c1_g1_i1	1	Y9863	DICDIProbable serine/threonine-protein kinase DDB
TRINITY_DN2455_c0_g1_i2	1	Y9863	DICDIProbable serine/threonine-protein kinase DDB
TRINITY_DN22446_c0_g1_i3	1	Y9863	DICDIProbable serine/threonine-protein kinase DDB
TRINITY_DN13251_c0_g1_i12	1	Y9863	DICDIProbable serine/threonine-protein kinase DDB
TRINITY_DN3204_c2_g1_i1	1	Y9863	DICDIProbable serine/threonine-protein kinase DDB
TRINITY_DN14144_c0_g1_i12	1	Y9863	DICDIProbable serine/threonine-protein kinase DDB
TRINITY_DN8043_c2_g1_i8	1	Y9863	DICDIProbable serine/threonine-protein kinase DDB
TRINITY_DN585_c0_g1_i7	1	Y9863	DICDIProbable serine/threonine-protein kinase DDB
TRINITY_DN21820_c0_g1_i11	1	Y9853	DICDIProbable serine/threonine-protein kinase DDB
TRINITY_DN27648_c0_g1_i2	1	Y9851	DICDIProbable serine/threonine-protein kinase DDB
TRINITY_DN31383_c0_g1_i12	1	Y9851	DICDIProbable serine/threonine-protein kinase DDB
TRINITY_DN7025_c0_g1_i10	1	Y9851	DICDIProbable serine/threonine-protein kinase DDB
TRINITY_DN31383_c0_g1_i3	1	Y9851	DICDIProbable serine/threonine-protein kinase DDB
TRINITY_DN15027_c0_g1_i12	1	Y9851	DICDIProbable serine/threonine-protein kinase DDB
TRINITY_DN119387_c0_g1_i1	1	Y980	PASMUProbable transcriptional regulatory protein PM0980 OS=Pasteurella multocida (strain Pm70) OX=272843 GN=PM0980 PE=3 SV=1
TRINITY_DN65694_c0_g1_i1	1	Y955	SYNY3Uncharacterized tRNA/rRNA methyltransferase slr0955 OS=Synechocystis sp. (strain PCC 6803 / Kazusa) OX=1111708 GN=slr0955 PE=3 SV=1
TRINITY_DN110342_c0_g1_i1	1	Y938	SYNP6Uncharacterized serine protease syc0938
TRINITY_DN104684_c0_g1_i1	1	Y927C	MYCTOUncharacterized oxidoreductase MT0954 OS=Mycobacterium tuberculosis (strain CDC 1551 / Oshkosh) OX=83331 GN=MT0954 PE=3 SV=1
TRINITY_DN10682_c0_g1_i1	1	Y8948	DICDIPutative methyltransferase DDB
TRINITY_DN27416_c1_g1_i3	1	Y894	MYCTOUncharacterized protein MT0918 OS=Mycobacterium tuberculosis (strain CDC 1551 / Oshkosh) OX=83331 GN=MT0918 PE=4 SV=1
TRINITY_DN108284_c0_g1_i1	1	Y893	DEIRAUncharacterized protein DR
TRINITY_DN9384_c0_g1_i26	1	Y8923	DICDIPutative uncharacterized transmembrane protein DDB
TRINITY_DN20290_c0_g1_i35	1	Y8923	DICDIPutative uncharacterized transmembrane protein DDB
TRINITY_DN168_c2_g1_i1	1	Y8923	DICDIPutative uncharacterized transmembrane protein DDB
TRINITY_DN11818_c0_g1_i6	1	Y8923	DICDIPutative uncharacterized transmembrane protein DDB
TRINITY_DN20290_c0_g1_i16	1	Y8923	DICDIPutative uncharacterized transmembrane protein DDB
TRINITY_DN9384_c0_g1_i27	1	Y8923	DICDIPutative uncharacterized transmembrane protein DDB
TRINITY_DN20290_c0_g1_i2	1	Y8923	DICDIPutative uncharacterized transmembrane protein DDB
TRINITY_DN18899_c0_g1_i15	1	Y8923	DICDIPutative uncharacterized transmembrane protein DDB
TRINITY_DN11818_c0_g1_i3	1	Y8923	DICDIPutative uncharacterized transmembrane protein DDB
TRINITY_DN84725_c0_g1_i1	1	Y854	PYRHORutC family protein PH0854 OS=Pyrococcus horikoshii (strain ATCC 700860 / DSM 12428 / JCM 9974 / NBRC 100139 / OT-3) OX=70601 GN=PH0854 PE=1 SV=2
TRINITY_DN4706_c0_g1_i5	1	Y8295	DICDIPutative phosphatidylglycerol/phosphatidylinositol transfer protein DDB
TRINITY_DN146984_c0_g1_i1	1	Y816	SYNY3Uncharacterized oxidoreductase sll0816 OS=Synechocystis sp. (strain PCC 6803 / Kazusa) OX=1111708 GN=sll0816 PE=3 SV=1
TRINITY_DN37533_c0_g1_i1	1	Y7754	DICDITNF receptor-associated factor family protein DDB
TRINITY_DN36063_c0_g1_i9	1	Y772	SYNY3Uncharacterized protein sll0772 OS=Synechocystis sp. (strain PCC 6803 / Kazusa) OX=1111708 GN=sll0772 PE=3 SV=3
TRINITY_DN57625_c0_g1_i1	1	Y772	SYNY3Uncharacterized protein sll0772 OS=Synechocystis sp. (strain PCC 6803 / Kazusa) OX=1111708 GN=sll0772 PE=3 SV=3
TRINITY_DN58065_c0_g1_i1	1	Y772	SYNY3Uncharacterized protein sll0772 OS=Synechocystis sp. (strain PCC 6803 / Kazusa) OX=1111708 GN=sll0772 PE=3 SV=3
TRINITY_DN36063_c0_g1_i3	1	Y772	SYNY3Uncharacterized protein sll0772 OS=Synechocystis sp. (strain PCC 6803 / Kazusa) OX=1111708 GN=sll0772 PE=3 SV=3
TRINITY_DN4790_c1_g1_i2	1	Y669	CUPNHPutative tyrosine-protein phosphatase H16
TRINITY_DN4790_c1_g1_i3	1	Y669	CUPNHPutative tyrosine-protein phosphatase H16
TRINITY_DN759_c0_g1_i15	1	Y6373	DICDIProbable serine/threonine-protein kinase DDB
TRINITY_DN114669_c0_g1_i1	1	Y617	SYNY3Uncharacterized protein sll0617 OS=Synechocystis sp. (strain PCC 6803 / Kazusa) OX=1111708 GN=sll0617 PE=3 SV=1
TRINITY_DN23188_c0_g1_i17	1	Y5487	ARATHProbable LRR receptor-like serine/threonine-protein kinase At5g48740 OS=Arabidopsis thaliana OX=3702 GN=At5g48740 PE=1 SV=1
TRINITY_DN521_c0_g1_i9	1	Y5363	DICDIFido domain-containing protein DDB
TRINITY_DN6031_c0_g1_i3	1	Y508	THEMAUncharacterized protein TM
TRINITY_DN26516_c0_g1_i8	1	Y508	THEMAUncharacterized protein TM
TRINITY_DN23345_c0_g1_i1	1	Y508	THEMAUncharacterized protein TM
TRINITY_DN26516_c0_g1_i7	1	Y508	THEMAUncharacterized protein TM
TRINITY_DN6031_c0_g1_i1	1	Y508	THEMAUncharacterized protein TM
TRINITY_DN1445_c0_g1_i23	1	Y508	THEMAUncharacterized protein TM
TRINITY_DN28045_c0_g1_i5	1	Y508	THEMAUncharacterized protein TM
TRINITY_DN411_c0_g1_i7	1	Y4MH	SINFNUncharacterized protein y4mH OS=Sinorhizobium fredii (strain NBRC 101917 / NGR234) OX=394 GN=NGR
TRINITY_DN411_c0_g1_i9	1	Y4MH	SINFNUncharacterized protein y4mH OS=Sinorhizobium fredii (strain NBRC 101917 / NGR234) OX=394 GN=NGR
TRINITY_DN411_c0_g1_i18	1	Y4MH	SINFNUncharacterized protein y4mH OS=Sinorhizobium fredii (strain NBRC 101917 / NGR234) OX=394 GN=NGR
TRINITY_DN411_c0_g1_i6	1	Y4MH	SINFNUncharacterized protein y4mH OS=Sinorhizobium fredii (strain NBRC 101917 / NGR234) OX=394 GN=NGR
TRINITY_DN411_c0_g1_i21	1	Y4MH	SINFNUncharacterized protein y4mH OS=Sinorhizobium fredii (strain NBRC 101917 / NGR234) OX=394 GN=NGR
TRINITY_DN5665_c0_g1_i22	1	Y489	RICBRPutative ankyrin repeat protein RBE
TRINITY_DN43065_c0_g1_i4	1	Y489	RICBRPutative ankyrin repeat protein RBE
TRINITY_DN1453_c0_g1_i78	1	Y489	RICBRPutative ankyrin repeat protein RBE
TRINITY_DN43065_c0_g1_i2	1	Y489	RICBRPutative ankyrin repeat protein RBE
TRINITY_DN2396_c0_g1_i4	1	Y4775	DICDIPH domain-containing protein DDB
TRINITY_DN2396_c0_g1_i1	1	Y4775	DICDIPH domain-containing protein DDB
TRINITY_DN2396_c0_g1_i30	1	Y4775	DICDIPH domain-containing protein DDB
TRINITY_DN60659_c0_g1_i1	1	Y471	RICPRUncharacterized protein RP471 OS=Rickettsia prowazekii (strain Madrid E) OX=272947 GN=RP471 PE=4 SV=1
TRINITY_DN11964_c0_g1_i8	1	Y4550	NOSS1Uncharacterized protein alr4550 OS=Nostoc sp. (strain PCC 7120 / SAG 25.82 / UTEX 2576) OX=103690 GN=alr4550 PE=1 SV=1
TRINITY_DN11964_c0_g1_i9	1	Y4550	NOSS1Uncharacterized protein alr4550 OS=Nostoc sp. (strain PCC 7120 / SAG 25.82 / UTEX 2576) OX=103690 GN=alr4550 PE=1 SV=1
TRINITY_DN36063_c0_g1_i1	1	Y4550	NOSS1Uncharacterized protein alr4550 OS=Nostoc sp. (strain PCC 7120 / SAG 25.82 / UTEX 2576) OX=103690 GN=alr4550 PE=1 SV=1
TRINITY_DN11964_c0_g1_i2	1	Y4550	NOSS1Uncharacterized protein alr4550 OS=Nostoc sp. (strain PCC 7120 / SAG 25.82 / UTEX 2576) OX=103690 GN=alr4550 PE=1 SV=1
TRINITY_DN36063_c0_g1_i8	1	Y4550	NOSS1Uncharacterized protein alr4550 OS=Nostoc sp. (strain PCC 7120 / SAG 25.82 / UTEX 2576) OX=103690 GN=alr4550 PE=1 SV=1
TRINITY_DN36063_c0_g1_i2	1	Y4550	NOSS1Uncharacterized protein alr4550 OS=Nostoc sp. (strain PCC 7120 / SAG 25.82 / UTEX 2576) OX=103690 GN=alr4550 PE=1 SV=1
TRINITY_DN11964_c0_g1_i1	1	Y4550	NOSS1Uncharacterized protein alr4550 OS=Nostoc sp. (strain PCC 7120 / SAG 25.82 / UTEX 2576) OX=103690 GN=alr4550 PE=1 SV=1
TRINITY_DN11964_c1_g1_i1	1	Y4550	NOSS1Uncharacterized protein alr4550 OS=Nostoc sp. (strain PCC 7120 / SAG 25.82 / UTEX 2576) OX=103690 GN=alr4550 PE=1 SV=1
TRINITY_DN11964_c1_g2_i8	1	Y4550	NOSS1Uncharacterized protein alr4550 OS=Nostoc sp. (strain PCC 7120 / SAG 25.82 / UTEX 2576) OX=103690 GN=alr4550 PE=1 SV=1
TRINITY_DN11964_c1_g2_i7	1	Y4550	NOSS1Uncharacterized protein alr4550 OS=Nostoc sp. (strain PCC 7120 / SAG 25.82 / UTEX 2576) OX=103690 GN=alr4550 PE=1 SV=1
TRINITY_DN36063_c0_g1_i7	1	Y4550	NOSS1Uncharacterized protein alr4550 OS=Nostoc sp. (strain PCC 7120 / SAG 25.82 / UTEX 2576) OX=103690 GN=alr4550 PE=1 SV=1
TRINITY_DN11964_c0_g1_i7	1	Y4550	NOSS1Uncharacterized protein alr4550 OS=Nostoc sp. (strain PCC 7120 / SAG 25.82 / UTEX 2576) OX=103690 GN=alr4550 PE=1 SV=1
TRINITY_DN11964_c0_g1_i3	1	Y4550	NOSS1Uncharacterized protein alr4550 OS=Nostoc sp. (strain PCC 7120 / SAG 25.82 / UTEX 2576) OX=103690 GN=alr4550 PE=1 SV=1
TRINITY_DN11964_c0_g1_i13	1	Y4550	NOSS1Uncharacterized protein alr4550 OS=Nostoc sp. (strain PCC 7120 / SAG 25.82 / UTEX 2576) OX=103690 GN=alr4550 PE=1 SV=1
TRINITY_DN74438_c0_g1_i1	1	Y4550	NOSS1Uncharacterized protein alr4550 OS=Nostoc sp. (strain PCC 7120 / SAG 25.82 / UTEX 2576) OX=103690 GN=alr4550 PE=1 SV=1
TRINITY_DN23188_c0_g1_i14	1	Y4291	ARATHProbable LRR receptor-like serine/threonine-protein kinase At4g29180 OS=Arabidopsis thaliana OX=3702 GN=At4g29180 PE=1 SV=2
TRINITY_DN123541_c0_g1_i1	1	Y3971	NOSS1Putative zinc metalloprotease all3971 OS=Nostoc sp. (strain PCC 7120 / SAG 25.82 / UTEX 2576) OX=103690 GN=all3971 PE=3 SV=1
TRINITY_DN646_c1_g1_i5	1	Y381	BACP2Putative hydro-lyase BPUM
TRINITY_DN646_c1_g1_i7	1	Y381	BACP2Putative hydro-lyase BPUM
TRINITY_DN123759_c0_g1_i1	1	Y3691	SHEFNUncharacterized protein Sfri
TRINITY_DN5134_c0_g1_i1	1	Y34F	DROMEUncharacterized protein CG43867 OS=Drosophila melanogaster OX=7227 GN=CG43867 PE=1 SV=4
TRINITY_DN2462_c0_g1_i2	1	Y3136	ARATHClavaminate synthase-like protein At3g21360 OS=Arabidopsis thaliana OX=3702 GN=At3g21360 PE=1 SV=1
TRINITY_DN110866_c0_g1_i1	1	Y3122	SYNY3Uncharacterized protein ssr3122 OS=Synechocystis sp. (strain PCC 6803 / Kazusa) OX=1111708 GN=ssr3122 PE=3 SV=1
TRINITY_DN134529_c0_g1_i1	1	Y3122	SYNY3Uncharacterized protein ssr3122 OS=Synechocystis sp. (strain PCC 6803 / Kazusa) OX=1111708 GN=ssr3122 PE=3 SV=1
TRINITY_DN15888_c0_g1_i52	1	Y2R2	DROMEPutative 115 kDa protein in type-1 retrotransposable element R1DM OS=Drosophila melanogaster OX=7227 GN=R1A1-element\ORF2 PE=4 SV=1
TRINITY_DN6031_c0_g1_i2	1	Y2899	SACS2Uncharacterized protein SSO2899 OS=Saccharolobus solfataricus (strain ATCC 35092 / DSM 1617 / JCM 11322 / P2) OX=273057 GN=SSO2899 PE=4 SV=1
TRINITY_DN142655_c0_g1_i1	1	Y2524	CUPNHUncharacterized symporter H16
TRINITY_DN16036_c1_g1_i1	1	Y2524	CUPNHUncharacterized symporter H16
TRINITY_DN35698_c1_g1_i1	1	Y2524	CUPNHUncharacterized symporter H16
TRINITY_DN1762_c0_g1_i41	1	Y2383	SULTOUncharacterized protein STK
TRINITY_DN1762_c0_g1_i66	1	Y2383	SULTOUncharacterized protein STK
TRINITY_DN1762_c0_g1_i21	1	Y2383	SULTOUncharacterized protein STK
TRINITY_DN14954_c0_g2_i2	1	Y2340	DICDITNF receptor-associated factor family protein DDB
TRINITY_DN5984_c1_g1_i1	1	Y2340	DICDITNF receptor-associated factor family protein DDB
TRINITY_DN47419_c0_g1_i10	1	Y2340	DICDITNF receptor-associated factor family protein DDB
TRINITY_DN41912_c0_g1_i5	1	Y2340	DICDITNF receptor-associated factor family protein DDB
TRINITY_DN37077_c0_g2_i4	1	Y2340	DICDITNF receptor-associated factor family protein DDB
TRINITY_DN9786_c0_g1_i1	1	Y2194	DEIGDProbable transcriptional regulatory protein Dgeo
TRINITY_DN9786_c0_g1_i4	1	Y2194	DEIGDProbable transcriptional regulatory protein Dgeo
TRINITY_DN146602_c0_g1_i1	1	Y2188	CORGLProbable endopeptidase Cgl2188 OS=Corynebacterium glutamicum (strain ATCC 13032 / DSM 20300 / JCM 1318 / LMG 3730 / NCIMB 10025) OX=196627 GN=Cgl2188 PE=3 SV=1
TRINITY_DN90411_c0_g1_i1	1	Y1949	SYNY3Thylakoid membrane protein slr1949 OS=Synechocystis sp. (strain PCC 6803 / Kazusa) OX=1111708 GN=slr1949 PE=4 SV=1
TRINITY_DN92520_c0_g1_i1	1	Y1949	SYNY3Thylakoid membrane protein slr1949 OS=Synechocystis sp. (strain PCC 6803 / Kazusa) OX=1111708 GN=slr1949 PE=4 SV=1
TRINITY_DN32104_c0_g1_i3	1	Y1934	MYCBOUncharacterized protein Mb1934c OS=Mycobacterium bovis (strain ATCC BAA-935 / AF2122/97) OX=233413 GN=lppD PE=4 SV=1
TRINITY_DN32104_c0_g1_i2	1	Y1934	MYCBOUncharacterized protein Mb1934c OS=Mycobacterium bovis (strain ATCC BAA-935 / AF2122/97) OX=233413 GN=lppD PE=4 SV=1
TRINITY_DN69429_c0_g1_i1	1	Y1806	AQUAEUncharacterized lipoprotein aq
TRINITY_DN109891_c0_g1_i1	1	Y175	SYNP2Uncharacterized protein SYNPCC7002
TRINITY_DN80810_c0_g1_i1	1	Y1629	SYNY3Uncharacterized RNA pseudouridine synthase slr1629 OS=Synechocystis sp. (strain PCC 6803 / Kazusa) OX=1111708 GN=slr1629 PE=3 SV=1
TRINITY_DN4511_c0_g1_i12	1	Y1586	HAEINUncharacterized protein HI
TRINITY_DN4511_c0_g1_i16	1	Y1586	HAEINUncharacterized protein HI
TRINITY_DN66346_c0_g1_i1	1	Y1483	SYNY3Uncharacterized protein sll1483 OS=Synechocystis sp. (strain PCC 6803 / Kazusa) OX=1111708 GN=sll1483 PE=3 SV=1
TRINITY_DN84445_c0_g1_i1	1	Y1461	MYCTOUPF0051 protein MT1508 OS=Mycobacterium tuberculosis (strain CDC 1551 / Oshkosh) OX=83331 GN=MT1508 PE=3 SV=1
TRINITY_DN1733_c5_g1_i13	1	Y1420	CLOABProtein CA
TRINITY_DN5707_c0_g1_i15	1	Y1411	RICBRPutative ankyrin repeat protein RBE
TRINITY_DN120462_c0_g1_i1	1	Y1367	MYCTOUncharacterized protein MT1414 OS=Mycobacterium tuberculosis (strain CDC 1551 / Oshkosh) OX=83331 GN=MT1414 PE=4 SV=2
TRINITY_DN188_c1_g3_i1	1	Y132A	HAEINUncharacterized transposase-like protein HI
TRINITY_DN188_c1_g2_i2	1	Y132A	HAEINUncharacterized transposase-like protein HI
TRINITY_DN9727_c0_g1_i1	1	Y1252	SULACUncharacterized protein Saci
TRINITY_DN9727_c0_g1_i2	1	Y1252	SULACUncharacterized protein Saci
TRINITY_DN121153_c0_g1_i1	1	Y1242	SYNY3Uncharacterized methyltransferase sll1242 OS=Synechocystis sp. (strain PCC 6803 / Kazusa) OX=1111708 GN=sll1242 PE=4 SV=2
TRINITY_DN48717_c0_g2_i1	1	Y1242	SYNY3Uncharacterized methyltransferase sll1242 OS=Synechocystis sp. (strain PCC 6803 / Kazusa) OX=1111708 GN=sll1242 PE=4 SV=2
TRINITY_DN119595_c0_g1_i1	1	Y1127	HAEINUncharacterized protein HI
TRINITY_DN133062_c0_g1_i1	1	Y108	SYNY3Putative ammonium transporter sll0108 OS=Synechocystis sp. (strain PCC 6803 / Kazusa) OX=1111708 GN=sll0108 PE=3 SV=1
TRINITY_DN83766_c0_g1_i1	1	Y108	SYNY3Putative ammonium transporter sll0108 OS=Synechocystis sp. (strain PCC 6803 / Kazusa) OX=1111708 GN=sll0108 PE=3 SV=1
TRINITY_DN134082_c0_g1_i1	1	Y108	SYNY3Putative ammonium transporter sll0108 OS=Synechocystis sp. (strain PCC 6803 / Kazusa) OX=1111708 GN=sll0108 PE=3 SV=1
TRINITY_DN53303_c0_g1_i1	1	Y108	SYNY3Putative ammonium transporter sll0108 OS=Synechocystis sp. (strain PCC 6803 / Kazusa) OX=1111708 GN=sll0108 PE=3 SV=1
TRINITY_DN136182_c0_g1_i1	1	Y108	SYNY3Putative ammonium transporter sll0108 OS=Synechocystis sp. (strain PCC 6803 / Kazusa) OX=1111708 GN=sll0108 PE=3 SV=1
TRINITY_DN60607_c0_g1_i1	1	Y108	SYNY3Putative ammonium transporter sll0108 OS=Synechocystis sp. (strain PCC 6803 / Kazusa) OX=1111708 GN=sll0108 PE=3 SV=1
TRINITY_DN34366_c0_g1_i1	1	Y108	SYNY3Putative ammonium transporter sll0108 OS=Synechocystis sp. (strain PCC 6803 / Kazusa) OX=1111708 GN=sll0108 PE=3 SV=1
TRINITY_DN85022_c0_g1_i1	1	Y1048	GEOSLUPF0225 protein GSU1048 OS=Geobacter sulfurreducens (strain ATCC 51573 / DSM 12127 / PCA) OX=243231 GN=GSU1048 PE=3 SV=1
TRINITY_DN6295_c0_g1_i47	1	Y1033	SACS2Kelch domain-containing protein SSO1033 OS=Saccharolobus solfataricus (strain ATCC 35092 / DSM 1617 / JCM 11322 / P2) OX=273057 GN=SSO1033 PE=3 SV=1
TRINITY_DN18547_c0_g1_i3	1	Y1033	SACS2Kelch domain-containing protein SSO1033 OS=Saccharolobus solfataricus (strain ATCC 35092 / DSM 1617 / JCM 11322 / P2) OX=273057 GN=SSO1033 PE=3 SV=1
TRINITY_DN6295_c0_g1_i19	1	Y1033	SACS2Kelch domain-containing protein SSO1033 OS=Saccharolobus solfataricus (strain ATCC 35092 / DSM 1617 / JCM 11322 / P2) OX=273057 GN=SSO1033 PE=3 SV=1
TRINITY_DN122972_c0_g1_i1	1	Y1022	METTHPutative biopolymer transport protein ExbB homolog OS=Methanothermobacter thermautotrophicus (strain ATCC 29096 / DSM 1053 / JCM 10044 / NBRC 100330 / Delta H) OX=187420 GN=MTH
TRINITY_DN14813_c1_g1_i1	1	Y0965	DICDITNF receptor-associated factor family protein DDB
TRINITY_DN14813_c1_g1_i2	1	Y0965	DICDITNF receptor-associated factor family protein DDB
TRINITY_DN130496_c0_g1_i1	1	Y074	SYNY3UPF0051 protein slr0074 OS=Synechocystis sp. (strain PCC 6803 / Kazusa) OX=1111708 GN=slr0074 PE=3 SV=1
TRINITY_DN118820_c0_g1_i1	1	Y074	SYNY3UPF0051 protein slr0074 OS=Synechocystis sp. (strain PCC 6803 / Kazusa) OX=1111708 GN=slr0074 PE=3 SV=1
TRINITY_DN12611_c0_g1_i16	1	Y0436	DICDIProbable serine/threonine-protein kinase DDB
TRINITY_DN3385_c0_g1_i28	1	Y0138	DICDIProbable serine/threonine-protein kinase DDB
TRINITY_DN96058_c0_g1_i1	1	Y002	PSEPKUncharacterized protein PP
TRINITY_DN109197_c0_g1_i1	1	XYLT1	RATXylosyltransferase 1 (Fragment) OS=Rattus norvegicus OX=10116 GN=Xylt1 PE=2 SV=1
TRINITY_DN6235_c0_g1_i1	1	XYLT1	PANTRXylosyltransferase 1 OS=Pan troglodytes OX=9598 GN=XYLT1 PE=2 SV=1
TRINITY_DN17337_c0_g1_i3	1	XYLK	HUMANGlycosaminoglycan xylosylkinase OS=Homo sapiens OX=9606 GN=FAM20B PE=1 SV=1
TRINITY_DN45779_c1_g1_i1	1	XYLB	HUMANXylulose kinase OS=Homo sapiens OX=9606 GN=XYLB PE=1 SV=3
TRINITY_DN1361_c0_g1_i13	1	XYLA	HORVUXylose isomerase OS=Hordeum vulgare OX=4513 GN=XYLA PE=1 SV=1
TRINITY_DN1361_c0_g1_i8	1	XYLA	HORVUXylose isomerase OS=Hordeum vulgare OX=4513 GN=XYLA PE=1 SV=1
TRINITY_DN5320_c0_g1_i1	1	XYL2	MEDSVBeta-xylosidase/alpha-L-arabinofuranosidase 2 OS=Medicago sativa subsp. varia OX=36902 GN=Xyl2 PE=2 SV=1
TRINITY_DN94_c0_g1_i45	1	XRCC6	MOUSEX-ray repair cross-complementing protein 6 OS=Mus musculus OX=10090 GN=Xrcc6 PE=1 SV=5
TRINITY_DN94_c0_g1_i6	1	XRCC6	HUMANX-ray repair cross-complementing protein 6 OS=Homo sapiens OX=9606 GN=XRCC6 PE=1 SV=2
TRINITY_DN94_c0_g1_i18	1	XRCC6	HUMANX-ray repair cross-complementing protein 6 OS=Homo sapiens OX=9606 GN=XRCC6 PE=1 SV=2
TRINITY_DN94_c0_g1_i79	1	XRCC6	CHICKX-ray repair cross-complementing protein 5 OS=Gallus gallus OX=9031 GN=XRCC6 PE=2 SV=1
TRINITY_DN1517_c0_g1_i14	1	XRCC5	MOUSEX-ray repair cross-complementing protein 5 OS=Mus musculus OX=10090 GN=Xrcc5 PE=1 SV=4
TRINITY_DN1517_c0_g1_i11	1	XRCC5	DICDIX-ray repair cross-complementing protein 5 OS=Dictyostelium discoideum OX=44689 GN=ku80 PE=3 SV=1
TRINITY_DN31712_c0_g2_i2	1	XRCC1	HUMANDNA repair protein XRCC1 OS=Homo sapiens OX=9606 GN=XRCC1 PE=1 SV=2
TRINITY_DN2959_c0_g1_i1	1	XPP3	RATXaa-Pro aminopeptidase 3 OS=Rattus norvegicus OX=10116 GN=Xpnpep3 PE=1 SV=1
TRINITY_DN2_c15_g1_i9	1	XPP3	RATXaa-Pro aminopeptidase 3 OS=Rattus norvegicus OX=10116 GN=Xpnpep3 PE=1 SV=1
TRINITY_DN2959_c0_g1_i31	1	XPP3	PONABXaa-Pro aminopeptidase 3 OS=Pongo abelii OX=9601 GN=XPNPEP3 PE=2 SV=1
TRINITY_DN2959_c0_g1_i42	1	XPP3	HUMANXaa-Pro aminopeptidase 3 OS=Homo sapiens OX=9606 GN=XPNPEP3 PE=1 SV=1
TRINITY_DN2588_c0_g1_i71	1	XPOT	MOUSEExportin-T OS=Mus musculus OX=10090 GN=Xpot PE=1 SV=3
TRINITY_DN2568_c0_g1_i26	1	XPO7B	XENLAExportin-7-B OS=Xenopus laevis OX=8355 GN=xpo7-b PE=2 SV=1
TRINITY_DN2568_c0_g1_i10	1	XPO7	CHICKExportin-7 OS=Gallus gallus OX=9031 GN=XPO7 PE=2 SV=1
TRINITY_DN11_c0_g1_i27	1	XPO6	MOUSEExportin-6 OS=Mus musculus OX=10090 GN=Xpo6 PE=1 SV=2
TRINITY_DN797_c1_g1_i4	1	XPO5	HUMANExportin-5 OS=Homo sapiens OX=9606 GN=XPO5 PE=1 SV=1
TRINITY_DN219_c0_g1_i230	1	XPO1	MOUSEExportin-1 OS=Mus musculus OX=10090 GN=Xpo1 PE=1 SV=1
TRINITY_DN219_c0_g1_i168	1	XPO1	MOUSEExportin-1 OS=Mus musculus OX=10090 GN=Xpo1 PE=1 SV=1
TRINITY_DN6012_c0_g2_i1	1	XPO1	HUMANExportin-1 OS=Homo sapiens OX=9606 GN=XPO1 PE=1 SV=1
TRINITY_DN219_c0_g1_i156	1	XPO1	HUMANExportin-1 OS=Homo sapiens OX=9606 GN=XPO1 PE=1 SV=1
TRINITY_DN219_c0_g1_i189	1	XPO1	HUMANExportin-1 OS=Homo sapiens OX=9606 GN=XPO1 PE=1 SV=1
TRINITY_DN219_c0_g2_i1	1	XPO1	HUMANExportin-1 OS=Homo sapiens OX=9606 GN=XPO1 PE=1 SV=1
TRINITY_DN219_c0_g1_i315	1	XPO1	HUMANExportin-1 OS=Homo sapiens OX=9606 GN=XPO1 PE=1 SV=1
TRINITY_DN27922_c0_g1_i13	1	XPC	MOUSEDNA repair protein complementing XP-C cells homolog OS=Mus musculus OX=10090 GN=Xpc PE=1 SV=2
TRINITY_DN6174_c1_g1_i5	1	XPA	MOUSEDNA repair protein complementing XP-A cells homolog OS=Mus musculus OX=10090 GN=Xpa PE=1 SV=2
TRINITY_DN6174_c1_g1_i2	1	XPA	HUMANDNA repair protein complementing XP-A cells OS=Homo sapiens OX=9606 GN=XPA PE=1 SV=1
TRINITY_DN32813_c0_g1_i11	1	XOXF	PARDEPutative dehydrogenase XoxF OS=Paracoccus denitrificans OX=266 GN=xoxF PE=3 SV=2
TRINITY_DN129_c0_g1_i31	1	XDH	ORYSJXanthine dehydrogenase OS=Oryza sativa subsp. japonica OX=39947 GN=XDH PE=2 SV=1
TRINITY_DN16778_c0_g1_i1	1	XDH	ORYSJXanthine dehydrogenase OS=Oryza sativa subsp. japonica OX=39947 GN=XDH PE=2 SV=1
TRINITY_DN33616_c0_g1_i15	1	XDH	HUMANXanthine dehydrogenase/oxidase OS=Homo sapiens OX=9606 GN=XDH PE=1 SV=4
TRINITY_DN30508_c0_g1_i2	1	XDH	FELCAXanthine dehydrogenase/oxidase OS=Felis catus OX=9685 GN=XDH PE=2 SV=3
TRINITY_DN4916_c0_g1_i7	1	XDH	DROSUXanthine dehydrogenase OS=Drosophila subobscura OX=7241 GN=Xdh PE=3 SV=1
TRINITY_DN4916_c0_g1_i2	1	XDH	DROPSXanthine dehydrogenase OS=Drosophila pseudoobscura pseudoobscura OX=46245 GN=ry PE=3 SV=2
TRINITY_DN4916_c0_g1_i9	1	XDH	DROPSXanthine dehydrogenase OS=Drosophila pseudoobscura pseudoobscura OX=46245 GN=ry PE=3 SV=2
TRINITY_DN2064_c1_g1_i29	1	XDH	DROMEXanthine dehydrogenase OS=Drosophila melanogaster OX=7227 GN=ry PE=2 SV=2
TRINITY_DN39725_c0_g1_i2	1	XDH	DICDIXanthine dehydrogenase OS=Dictyostelium discoideum OX=44689 GN=xdh PE=3 SV=1
TRINITY_DN4916_c0_g1_i14	1	XDH	DICDIXanthine dehydrogenase OS=Dictyostelium discoideum OX=44689 GN=xdh PE=3 SV=1
TRINITY_DN4916_c0_g1_i11	1	XDH	DICDIXanthine dehydrogenase OS=Dictyostelium discoideum OX=44689 GN=xdh PE=3 SV=1
TRINITY_DN4916_c0_g1_i20	1	XDH	DICDIXanthine dehydrogenase OS=Dictyostelium discoideum OX=44689 GN=xdh PE=3 SV=1
TRINITY_DN2064_c1_g1_i34	1	XDH	CHICKXanthine dehydrogenase/oxidase OS=Gallus gallus OX=9031 GN=XDH PE=1 SV=1
TRINITY_DN3445_c0_g1_i9	1	XDH	CHICKXanthine dehydrogenase/oxidase OS=Gallus gallus OX=9031 GN=XDH PE=1 SV=1
TRINITY_DN25970_c0_g1_i2	1	XDH	CHICKXanthine dehydrogenase/oxidase OS=Gallus gallus OX=9031 GN=XDH PE=1 SV=1
TRINITY_DN2064_c1_g1_i23	1	XDH	CHICKXanthine dehydrogenase/oxidase OS=Gallus gallus OX=9031 GN=XDH PE=1 SV=1
TRINITY_DN21760_c0_g1_i6	1	XDH	CHICKXanthine dehydrogenase/oxidase OS=Gallus gallus OX=9031 GN=XDH PE=1 SV=1
TRINITY_DN18092_c0_g1_i20	1	XDH	BOVINXanthine dehydrogenase/oxidase OS=Bos taurus OX=9913 GN=XDH PE=1 SV=4
TRINITY_DN10864_c0_g1_i1	1	XB36	ORYSJProbable E3 ubiquitin-protein ligase XBOS36 OS=Oryza sativa subsp. japonica OX=39947 GN=XBOS36 PE=2 SV=1
TRINITY_DN15110_c1_g1_i5	1	XB36	ORYSJProbable E3 ubiquitin-protein ligase XBOS36 OS=Oryza sativa subsp. japonica OX=39947 GN=XBOS36 PE=2 SV=1
TRINITY_DN7852_c0_g1_i7	1	XB36	ORYSJProbable E3 ubiquitin-protein ligase XBOS36 OS=Oryza sativa subsp. japonica OX=39947 GN=XBOS36 PE=2 SV=1
TRINITY_DN38379_c0_g1_i1	1	XB36	ORYSJProbable E3 ubiquitin-protein ligase XBOS36 OS=Oryza sativa subsp. japonica OX=39947 GN=XBOS36 PE=2 SV=1
TRINITY_DN53277_c0_g1_i2	1	XB36	ORYSJProbable E3 ubiquitin-protein ligase XBOS36 OS=Oryza sativa subsp. japonica OX=39947 GN=XBOS36 PE=2 SV=1
TRINITY_DN15258_c0_g1_i23	1	XB36	ORYSJProbable E3 ubiquitin-protein ligase XBOS36 OS=Oryza sativa subsp. japonica OX=39947 GN=XBOS36 PE=2 SV=1
TRINITY_DN29118_c0_g1_i2	1	XB33	ORYSJProbable E3 ubiquitin-protein ligase XBOS33 OS=Oryza sativa subsp. japonica OX=39947 GN=XBOS33 PE=2 SV=1
TRINITY_DN28509_c0_g3_i1	1	XB32	ORYSJProbable E3 ubiquitin-protein ligase XBOS32 OS=Oryza sativa subsp. japonica OX=39947 GN=XBOS32 PE=2 SV=2
TRINITY_DN3986_c0_g1_i4	1	XAF1	HUMANXIAP-associated factor 1 OS=Homo sapiens OX=9606 GN=XAF1 PE=1 SV=1
TRINITY_DN106_c0_g1_i102	1	WWP1	MOUSENEDD4-like E3 ubiquitin-protein ligase WWP1 OS=Mus musculus OX=10090 GN=Wwp1 PE=1 SV=2
TRINITY_DN106_c0_g1_i46	1	WWP1	MOUSENEDD4-like E3 ubiquitin-protein ligase WWP1 OS=Mus musculus OX=10090 GN=Wwp1 PE=1 SV=2
TRINITY_DN106_c0_g1_i86	1	WWP1	MOUSENEDD4-like E3 ubiquitin-protein ligase WWP1 OS=Mus musculus OX=10090 GN=Wwp1 PE=1 SV=2
TRINITY_DN6629_c0_g1_i38	1	WTR25	ARATHWAT1-related protein At3g45870 OS=Arabidopsis thaliana OX=3702 GN=At3g45870 PE=2 SV=1
TRINITY_DN18300_c0_g1_i4	1	WTR25	ARATHWAT1-related protein At3g45870 OS=Arabidopsis thaliana OX=3702 GN=At3g45870 PE=2 SV=1
TRINITY_DN18300_c0_g1_i6	1	WTR25	ARATHWAT1-related protein At3g45870 OS=Arabidopsis thaliana OX=3702 GN=At3g45870 PE=2 SV=1
TRINITY_DN449_c0_g1_i53	1	WSDU1	DANREWD repeat, SAM and U-box domain-containing protein 1 OS=Danio rerio OX=7955 GN=wdsub1 PE=2 SV=1
TRINITY_DN449_c0_g1_i49	1	WSDU1	DANREWD repeat, SAM and U-box domain-containing protein 1 OS=Danio rerio OX=7955 GN=wdsub1 PE=2 SV=1
TRINITY_DN35333_c0_g1_i2	1	WSCD2	DANREWSC domain-containing protein 2 OS=Danio rerio OX=7955 GN=wscd2 PE=3 SV=1
TRINITY_DN28782_c0_g1_i3	1	WSCD	ANOGAWSCD family member AGAP003962 OS=Anopheles gambiae OX=7165 GN=AGAP003962 PE=3 SV=3
TRINITY_DN24571_c0_g1_i1	1	WSCD	AEDAEWSCD family member AAEL009094 OS=Aedes aegypti OX=7159 GN=AAEL009094 PE=3 SV=1
TRINITY_DN75252_c0_g1_i1	1	WSCD	AEDAEWSCD family member AAEL009094 OS=Aedes aegypti OX=7159 GN=AAEL009094 PE=3 SV=1
TRINITY_DN65_c4_g1_i2	1	WRN	XENLAWerner syndrome ATP-dependent helicase homolog OS=Xenopus laevis OX=8355 GN=wrn PE=2 SV=1
TRINITY_DN27802_c0_g1_i7	1	WRN	HUMANWerner syndrome ATP-dependent helicase OS=Homo sapiens OX=9606 GN=WRN PE=1 SV=2
TRINITY_DN25938_c0_g1_i16	1	WRN	HUMANWerner syndrome ATP-dependent helicase OS=Homo sapiens OX=9606 GN=WRN PE=1 SV=2
TRINITY_DN26666_c0_g1_i14	1	WRB	HUMANTail-anchored protein insertion receptor WRB OS=Homo sapiens OX=9606 GN=WRB PE=1 SV=2
TRINITY_DN10834_c0_g1_i1	1	WNT7B	HUMANProtein Wnt-7b OS=Homo sapiens OX=9606 GN=WNT7B PE=1 SV=2
TRINITY_DN18782_c0_g1_i1	1	WNT5A	PLEWAProtein Wnt-5a OS=Pleurodeles waltl OX=8319 GN=WNT5A PE=3 SV=1
TRINITY_DN20855_c0_g1_i22	1	WNK3	MOUSESerine/threonine-protein kinase WNK3 OS=Mus musculus OX=10090 GN=Wnk3 PE=1 SV=3
TRINITY_DN604_c1_g1_i10	1	WNK3	HUMANSerine/threonine-protein kinase WNK3 OS=Homo sapiens OX=9606 GN=WNK3 PE=1 SV=3
TRINITY_DN12893_c0_g1_i13	1	WNK	CAEELSerine/threonine-protein kinase WNK OS=Caenorhabditis elegans OX=6239 GN=wnk-1 PE=1 SV=1
TRINITY_DN2152_c0_g1_i86	1	WIPI3	XENTRWD repeat domain phosphoinositide-interacting protein 3 OS=Xenopus tropicalis OX=8364 GN=wdr45b PE=2 SV=1
TRINITY_DN162_c0_g1_i67	1	WIPI2	MOUSEWD repeat domain phosphoinositide-interacting protein 2 OS=Mus musculus OX=10090 GN=Wipi2 PE=1 SV=1
TRINITY_DN162_c0_g1_i18	1	WIPI2	MOUSEWD repeat domain phosphoinositide-interacting protein 2 OS=Mus musculus OX=10090 GN=Wipi2 PE=1 SV=1
TRINITY_DN162_c0_g1_i4	1	WIPI2	MOUSEWD repeat domain phosphoinositide-interacting protein 2 OS=Mus musculus OX=10090 GN=Wipi2 PE=1 SV=1
TRINITY_DN3633_c0_g1_i1	1	WHRN	RATWhirlin OS=Rattus norvegicus OX=10116 GN=Whrn PE=1 SV=1
TRINITY_DN2611_c0_g1_i5	1	WHRN	HUMANWhirlin OS=Homo sapiens OX=9606 GN=WHRN PE=1 SV=4
TRINITY_DN71241_c0_g1_i1	1	WHIB1	MYCTOTranscriptional regulator WhiB1 OS=Mycobacterium tuberculosis (strain CDC 1551 / Oshkosh) OX=83331 GN=whiB1 PE=2 SV=1
TRINITY_DN15027_c0_g1_i6	1	WEE1	ARATHWee1-like protein kinase OS=Arabidopsis thaliana OX=3702 GN=WEE1 PE=1 SV=1
TRINITY_DN15027_c0_g1_i10	1	WEE1	ARATHWee1-like protein kinase OS=Arabidopsis thaliana OX=3702 GN=WEE1 PE=1 SV=1
TRINITY_DN2747_c0_g1_i111	1	WDY	AEDAEWD repeat-containing protein on Y chromosome OS=Aedes aegypti OX=7159 GN=WDY PE=4 SV=1
TRINITY_DN10736_c1_g1_i12	1	WDTC1	HUMANWD and tetratricopeptide repeats protein 1 OS=Homo sapiens OX=9606 GN=WDTC1 PE=1 SV=2
TRINITY_DN1996_c0_g1_i7	1	WDR93	HUMANWD repeat-containing protein 93 OS=Homo sapiens OX=9606 GN=WDR93 PE=2 SV=1
TRINITY_DN1674_c0_g1_i25	1	WDR92	HUMANWD repeat-containing protein 92 OS=Homo sapiens OX=9606 GN=WDR92 PE=1 SV=1
TRINITY_DN5089_c0_g1_i11	1	WDR90	XENTRWD repeat-containing protein 90 OS=Xenopus tropicalis OX=8364 GN=wdr90 PE=2 SV=1
TRINITY_DN13614_c0_g1_i4	1	WDR89	MOUSEWD repeat-containing protein 89 OS=Mus musculus OX=10090 GN=Wdr89 PE=2 SV=1
TRINITY_DN6982_c0_g1_i6	1	WDR87	HUMANWD repeat-containing protein 87 OS=Homo sapiens OX=9606 GN=WDR87 PE=1 SV=3
TRINITY_DN12570_c0_g1_i17	1	WDR81	RATWD repeat-containing protein 81 OS=Rattus norvegicus OX=10116 GN=Wdr81 PE=3 SV=1
TRINITY_DN12570_c0_g1_i16	1	WDR81	RATWD repeat-containing protein 81 OS=Rattus norvegicus OX=10116 GN=Wdr81 PE=3 SV=1
TRINITY_DN12570_c0_g1_i14	1	WDR81	HUMANWD repeat-containing protein 81 OS=Homo sapiens OX=9606 GN=WDR81 PE=1 SV=2
TRINITY_DN3849_c0_g1_i64	1	WDR78	MOUSEWD repeat-containing protein 78 OS=Mus musculus OX=10090 GN=Wdr78 PE=1 SV=1
TRINITY_DN3660_c0_g1_i3	1	WDR75	MOUSEWD repeat-containing protein 75 OS=Mus musculus OX=10090 GN=Wdr75 PE=1 SV=1
TRINITY_DN3660_c0_g1_i7	1	WDR75	MOUSEWD repeat-containing protein 75 OS=Mus musculus OX=10090 GN=Wdr75 PE=1 SV=1
TRINITY_DN51624_c0_g1_i9	1	WDR74	HUMANWD repeat-containing protein 74 OS=Homo sapiens OX=9606 GN=WDR74 PE=1 SV=1
TRINITY_DN51624_c0_g1_i12	1	WDR74	HUMANWD repeat-containing protein 74 OS=Homo sapiens OX=9606 GN=WDR74 PE=1 SV=1
TRINITY_DN15935_c1_g1_i3	1	WDR7	RATWD repeat-containing protein 7 OS=Rattus norvegicus OX=10116 GN=Wdr7 PE=1 SV=1
TRINITY_DN15935_c1_g1_i7	1	WDR7	RATWD repeat-containing protein 7 OS=Rattus norvegicus OX=10116 GN=Wdr7 PE=1 SV=1
TRINITY_DN228_c1_g1_i9	1	WDR7	RATWD repeat-containing protein 7 OS=Rattus norvegicus OX=10116 GN=Wdr7 PE=1 SV=1
TRINITY_DN15935_c1_g1_i4	1	WDR7	RATWD repeat-containing protein 7 OS=Rattus norvegicus OX=10116 GN=Wdr7 PE=1 SV=1
TRINITY_DN16243_c0_g1_i2	1	WDR7	MOUSEWD repeat-containing protein 7 OS=Mus musculus OX=10090 GN=Wdr7 PE=1 SV=3
TRINITY_DN2747_c0_g1_i138	1	WDR64	HUMANWD repeat-containing protein 64 OS=Homo sapiens OX=9606 GN=WDR64 PE=2 SV=1
TRINITY_DN4099_c0_g1_i8	1	WDR61	CHICKWD repeat-containing protein 61 OS=Gallus gallus OX=9031 GN=WDR61 PE=2 SV=1
TRINITY_DN2495_c0_g1_i129	1	WDR60	HUMANWD repeat-containing protein 60 OS=Homo sapiens OX=9606 GN=WDR60 PE=1 SV=3
TRINITY_DN2495_c0_g1_i84	1	WDR60	HUMANWD repeat-containing protein 60 OS=Homo sapiens OX=9606 GN=WDR60 PE=1 SV=3
TRINITY_DN4102_c0_g1_i22	1	WDR59	CHICKGATOR complex protein WDR59 OS=Gallus gallus OX=9031 GN=WDR59 PE=2 SV=1
TRINITY_DN41854_c0_g1_i18	1	WDR55	ORYLAWD repeat-containing protein 55 OS=Oryzias latipes OX=8090 GN=wdr55 PE=1 SV=1
TRINITY_DN5442_c0_g1_i109	1	WDR54	MOUSEWD repeat-containing protein 54 OS=Mus musculus OX=10090 GN=Wdr54 PE=1 SV=1
TRINITY_DN2747_c0_g1_i143	1	WDR49	HUMANWD repeat-containing protein 49 OS=Homo sapiens OX=9606 GN=WDR49 PE=2 SV=1
TRINITY_DN6369_c0_g1_i6	1	WDR49	HUMANWD repeat-containing protein 49 OS=Homo sapiens OX=9606 GN=WDR49 PE=2 SV=1
TRINITY_DN5623_c0_g1_i32	1	WDR48	XENTRWD repeat-containing protein 48 OS=Xenopus tropicalis OX=8364 GN=wdr48 PE=2 SV=1
TRINITY_DN2445_c0_g1_i11	1	WDR44	XENLAWD repeat-containing protein 44 OS=Xenopus laevis OX=8355 GN=wdr44 PE=2 SV=1
TRINITY_DN2445_c0_g1_i14	1	WDR44	XENLAWD repeat-containing protein 44 OS=Xenopus laevis OX=8355 GN=wdr44 PE=2 SV=1
TRINITY_DN1130_c0_g1_i4	1	WDR43	HUMANWD repeat-containing protein 43 OS=Homo sapiens OX=9606 GN=WDR43 PE=1 SV=3
TRINITY_DN5388_c0_g1_i12	1	WDR41	MOUSEWD repeat-containing protein 41 OS=Mus musculus OX=10090 GN=Wdr41 PE=1 SV=1
TRINITY_DN5388_c0_g1_i10	1	WDR41	MOUSEWD repeat-containing protein 41 OS=Mus musculus OX=10090 GN=Wdr41 PE=1 SV=1
TRINITY_DN7648_c0_g1_i11	1	WDR4	HUMANtRNA (guanine-N(7)-)-methyltransferase non-catalytic subunit WDR4 OS=Homo sapiens OX=9606 GN=WDR4 PE=1 SV=2
TRINITY_DN26837_c1_g1_i5	1	WDR36	HUMANWD repeat-containing protein 36 OS=Homo sapiens OX=9606 GN=WDR36 PE=1 SV=1
TRINITY_DN40_c0_g1_i130	1	WDR36	HUMANWD repeat-containing protein 36 OS=Homo sapiens OX=9606 GN=WDR36 PE=1 SV=1
TRINITY_DN9016_c0_g1_i1	1	WDR36	HUMANWD repeat-containing protein 36 OS=Homo sapiens OX=9606 GN=WDR36 PE=1 SV=1
TRINITY_DN6884_c0_g1_i29	1	WDR35	RATWD repeat-containing protein 35 OS=Rattus norvegicus OX=10116 GN=Wdr35 PE=1 SV=1
TRINITY_DN6884_c0_g1_i10	1	WDR35	RATWD repeat-containing protein 35 OS=Rattus norvegicus OX=10116 GN=Wdr35 PE=1 SV=1
TRINITY_DN6884_c0_g1_i17	1	WDR35	RATWD repeat-containing protein 35 OS=Rattus norvegicus OX=10116 GN=Wdr35 PE=1 SV=1
TRINITY_DN12568_c0_g1_i14	1	WDR34	MOUSEWD repeat-containing protein 34 OS=Mus musculus OX=10090 GN=Wdr34 PE=1 SV=2
TRINITY_DN5056_c0_g1_i4	1	WDR33	MOUSEpre-mRNA 3' end processing protein WDR33 OS=Mus musculus OX=10090 GN=Wdr33 PE=1 SV=1
TRINITY_DN5056_c0_g1_i5	1	WDR33	MOUSEpre-mRNA 3' end processing protein WDR33 OS=Mus musculus OX=10090 GN=Wdr33 PE=1 SV=1
TRINITY_DN9416_c0_g1_i2	1	WDR27	HUMANWD repeat-containing protein 27 OS=Homo sapiens OX=9606 GN=WDR27 PE=1 SV=3
TRINITY_DN131_c1_g1_i85	1	WDR26	XENTRWD repeat-containing protein 26 OS=Xenopus tropicalis OX=8364 GN=wdr26 PE=2 SV=2
TRINITY_DN131_c1_g1_i44	1	WDR26	RATWD repeat-containing protein 26 OS=Rattus norvegicus OX=10116 GN=Wdr26 PE=3 SV=2
TRINITY_DN131_c1_g1_i37	1	WDR26	DANREWD repeat-containing protein 26 OS=Danio rerio OX=7955 GN=wdr26 PE=1 SV=1
TRINITY_DN7639_c0_g1_i120	1	WDR24	XENLAGATOR complex protein WDR24 OS=Xenopus laevis OX=8355 GN=wdr24 PE=2 SV=1
TRINITY_DN1632_c0_g1_i24	1	WDR19	MOUSEWD repeat-containing protein 19 OS=Mus musculus OX=10090 GN=Wdr19 PE=1 SV=1
TRINITY_DN1632_c0_g1_i392	1	WDR19	MOUSEWD repeat-containing protein 19 OS=Mus musculus OX=10090 GN=Wdr19 PE=1 SV=1
TRINITY_DN1632_c0_g1_i126	1	WDR19	MOUSEWD repeat-containing protein 19 OS=Mus musculus OX=10090 GN=Wdr19 PE=1 SV=1
TRINITY_DN1632_c0_g1_i123	1	WDR19	MOUSEWD repeat-containing protein 19 OS=Mus musculus OX=10090 GN=Wdr19 PE=1 SV=1
TRINITY_DN14340_c0_g1_i2	1	WDR13	PONABWD repeat-containing protein 13 OS=Pongo abelii OX=9601 GN=WDR13 PE=2 SV=1
TRINITY_DN561_c1_g1_i185	1	WDR11	MOUSEWD repeat-containing protein 11 OS=Mus musculus OX=10090 GN=Wdr11 PE=1 SV=1
TRINITY_DN561_c1_g1_i142	1	WDR11	DANREWD repeat-containing protein 11 OS=Danio rerio OX=7955 GN=wdr11 PE=2 SV=1
TRINITY_DN561_c1_g1_i26	1	WDR11	DANREWD repeat-containing protein 11 OS=Danio rerio OX=7955 GN=wdr11 PE=2 SV=1
TRINITY_DN133123_c0_g1_i1	1	WDR1	DROMEActin-interacting protein 1 OS=Drosophila melanogaster OX=7227 GN=flr PE=2 SV=1
TRINITY_DN1446_c0_g1_i9	1	WDR1	DROMEActin-interacting protein 1 OS=Drosophila melanogaster OX=7227 GN=flr PE=2 SV=1
TRINITY_DN2112_c0_g1_i41	1	WDHD1	HUMANWD repeat and HMG-box DNA-binding protein 1 OS=Homo sapiens OX=9606 GN=WDHD1 PE=1 SV=1
TRINITY_DN2112_c0_g1_i11	1	WDHD1	HUMANWD repeat and HMG-box DNA-binding protein 1 OS=Homo sapiens OX=9606 GN=WDHD1 PE=1 SV=1
TRINITY_DN2112_c0_g1_i29	1	WDHD1	HUMANWD repeat and HMG-box DNA-binding protein 1 OS=Homo sapiens OX=9606 GN=WDHD1 PE=1 SV=1
TRINITY_DN1013_c0_g1_i4	1	WDFY3	MOUSEWD repeat and FYVE domain-containing protein 3 OS=Mus musculus OX=10090 GN=Wdfy3 PE=1 SV=1
TRINITY_DN1013_c0_g1_i5	1	WDFY3	MOUSEWD repeat and FYVE domain-containing protein 3 OS=Mus musculus OX=10090 GN=Wdfy3 PE=1 SV=1
TRINITY_DN1386_c0_g1_i85	1	WDFY1	MOUSEWD repeat and FYVE domain-containing protein 1 OS=Mus musculus OX=10090 GN=Wdfy1 PE=1 SV=1
TRINITY_DN4150_c0_g1_i9	1	WC11	BOVINAntigen WC1.1 OS=Bos taurus OX=9913 PE=2 SV=1
TRINITY_DN3274_c0_g1_i15	1	WC11	BOVINAntigen WC1.1 OS=Bos taurus OX=9913 PE=2 SV=1
TRINITY_DN3274_c0_g1_i6	1	WC11	BOVINAntigen WC1.1 OS=Bos taurus OX=9913 PE=2 SV=1
TRINITY_DN547_c0_g1_i40	1	WAV3	ARATHE3 ubiquitin-protein ligase WAV3 OS=Arabidopsis thaliana OX=3702 GN=WAV3 PE=1 SV=1
TRINITY_DN547_c0_g1_i23	1	WAV3	ARATHE3 ubiquitin-protein ligase WAV3 OS=Arabidopsis thaliana OX=3702 GN=WAV3 PE=1 SV=1
TRINITY_DN2713_c0_g1_i7	1	WASL	BOVINNeural Wiskott-Aldrich syndrome protein OS=Bos taurus OX=9913 GN=WASL PE=1 SV=1
TRINITY_DN1006_c0_g1_i54	1	WASC5	XENTRWASH complex subunit 5 OS=Xenopus tropicalis OX=8364 GN=washc5 PE=2 SV=1
TRINITY_DN2398_c0_g1_i3	1	WASC4	MOUSEWASH complex subunit 4 OS=Mus musculus OX=10090 GN=Washc4 PE=1 SV=2
TRINITY_DN5186_c0_g1_i10	1	WASC3	XENLAWASH complex subunit 3 OS=Xenopus laevis OX=8355 GN=washc3 PE=2 SV=1
TRINITY_DN31253_c0_g1_i2	1	WAKLR	ARATHWall-associated receptor kinase-like 21 OS=Arabidopsis thaliana OX=3702 GN=WAKL21 PE=2 SV=2
TRINITY_DN22104_c0_g2_i1	1	WAKLA	ARATHWall-associated receptor kinase-like 1 OS=Arabidopsis thaliana OX=3702 GN=WAKL1 PE=2 SV=1
TRINITY_DN26026_c0_g1_i5	1	WAK2	ARATHWall-associated receptor kinase 2 OS=Arabidopsis thaliana OX=3702 GN=WAK2 PE=1 SV=1
TRINITY_DN1548_c0_g1_i7	1	VWKA	DICDIAlpha-protein kinase vwkA OS=Dictyostelium discoideum OX=44689 GN=vwkA PE=1 SV=1
TRINITY_DN4866_c0_g1_i20	1	VWKA	DICDIAlpha-protein kinase vwkA OS=Dictyostelium discoideum OX=44689 GN=vwkA PE=1 SV=1
TRINITY_DN19804_c0_g1_i2	1	VWKA	DICDIAlpha-protein kinase vwkA OS=Dictyostelium discoideum OX=44689 GN=vwkA PE=1 SV=1
TRINITY_DN2151_c0_g1_i12	1	VWKA	DICDIAlpha-protein kinase vwkA OS=Dictyostelium discoideum OX=44689 GN=vwkA PE=1 SV=1
TRINITY_DN4866_c0_g1_i5	1	VWKA	DICDIAlpha-protein kinase vwkA OS=Dictyostelium discoideum OX=44689 GN=vwkA PE=1 SV=1
TRINITY_DN83764_c0_g1_i1	1	VWF	MOUSEvon Willebrand factor OS=Mus musculus OX=10090 GN=Vwf PE=1 SV=2
TRINITY_DN18358_c0_g1_i7	1	VWDE	HUMANvon Willebrand factor D and EGF domain-containing protein OS=Homo sapiens OX=9606 GN=VWDE PE=2 SV=4
TRINITY_DN2080_c0_g1_i6	1	VWA7	MOUSEvon Willebrand factor A domain-containing protein 7 OS=Mus musculus OX=10090 GN=Vwa7 PE=2 SV=1
TRINITY_DN9058_c0_g1_i14	1	VWA3A	MOUSEvon Willebrand factor A domain-containing protein 3A OS=Mus musculus OX=10090 GN=Vwa3a PE=2 SV=1
TRINITY_DN9058_c0_g1_i10	1	VWA3A	MOUSEvon Willebrand factor A domain-containing protein 3A OS=Mus musculus OX=10090 GN=Vwa3a PE=2 SV=1
TRINITY_DN9058_c0_g1_i17	1	VWA3A	HUMANvon Willebrand factor A domain-containing protein 3A OS=Homo sapiens OX=9606 GN=VWA3A PE=2 SV=3
TRINITY_DN8253_c0_g1_i12	1	VWA3A	HUMANvon Willebrand factor A domain-containing protein 3A OS=Homo sapiens OX=9606 GN=VWA3A PE=2 SV=3
TRINITY_DN8253_c0_g1_i3	1	VWA3A	HUMANvon Willebrand factor A domain-containing protein 3A OS=Homo sapiens OX=9606 GN=VWA3A PE=2 SV=3
TRINITY_DN8253_c0_g1_i11	1	VWA3A	HUMANvon Willebrand factor A domain-containing protein 3A OS=Homo sapiens OX=9606 GN=VWA3A PE=2 SV=3
TRINITY_DN9058_c0_g1_i3	1	VWA3A	HUMANvon Willebrand factor A domain-containing protein 3A OS=Homo sapiens OX=9606 GN=VWA3A PE=2 SV=3
TRINITY_DN37499_c0_g2_i2	1	VTI1A	MOUSEVesicle transport through interaction with t-SNAREs homolog 1A OS=Mus musculus OX=10090 GN=Vti1a PE=1 SV=1
TRINITY_DN478_c1_g1_i6	1	VTI1A	HUMANVesicle transport through interaction with t-SNAREs homolog 1A OS=Homo sapiens OX=9606 GN=VTI1A PE=1 SV=2
TRINITY_DN1127_c0_g1_i3	1	VTA1	BOVINVacuolar protein sorting-associated protein VTA1 homolog OS=Bos taurus OX=9913 GN=VTA1 PE=2 SV=1
TRINITY_DN1127_c0_g1_i177	1	VTA1	BOVINVacuolar protein sorting-associated protein VTA1 homolog OS=Bos taurus OX=9913 GN=VTA1 PE=2 SV=1
TRINITY_DN1127_c0_g1_i130	1	VTA1	BOVINVacuolar protein sorting-associated protein VTA1 homolog OS=Bos taurus OX=9913 GN=VTA1 PE=2 SV=1
TRINITY_DN21860_c0_g1_i12	1	VSIG8	MOUSEV-set and immunoglobulin domain-containing protein 8 OS=Mus musculus OX=10090 GN=Vsig8 PE=2 SV=2
TRINITY_DN2157_c0_g2_i7	1	VRK1	DANRESerine/threonine-protein kinase VRK1 OS=Danio rerio OX=7955 GN=vrk1 PE=2 SV=1
TRINITY_DN2727_c0_g1_i11	1	VPS8	MOUSEVacuolar protein sorting-associated protein 8 homolog OS=Mus musculus OX=10090 GN=Vps8 PE=1 SV=1
TRINITY_DN2727_c0_g1_i7	1	VPS8	MOUSEVacuolar protein sorting-associated protein 8 homolog OS=Mus musculus OX=10090 GN=Vps8 PE=1 SV=1
TRINITY_DN2727_c0_g1_i5	1	VPS8	MOUSEVacuolar protein sorting-associated protein 8 homolog OS=Mus musculus OX=10090 GN=Vps8 PE=1 SV=1
TRINITY_DN7868_c1_g1_i23	1	VPS52	CANLFVacuolar protein sorting-associated protein 52 homolog OS=Canis lupus familiaris OX=9615 GN=VPS52 PE=3 SV=1
TRINITY_DN4610_c0_g1_i86	1	VPS50	RATSyndetin OS=Rattus norvegicus OX=10116 GN=Vps50 PE=1 SV=1
TRINITY_DN4610_c0_g1_i9	1	VPS50	HUMANSyndetin OS=Homo sapiens OX=9606 GN=VPS50 PE=1 SV=3
TRINITY_DN3871_c0_g1_i69	1	VPS4B	MOUSEVacuolar protein sorting-associated protein 4B OS=Mus musculus OX=10090 GN=Vps4b PE=1 SV=2
TRINITY_DN3871_c0_g1_i27	1	VPS4B	MOUSEVacuolar protein sorting-associated protein 4B OS=Mus musculus OX=10090 GN=Vps4b PE=1 SV=2
TRINITY_DN105329_c0_g1_i1	1	VPS4	YEASTVacuolar protein sorting-associated protein 4 OS=Saccharomyces cerevisiae (strain ATCC 204508 / S288c) OX=559292 GN=VPS4 PE=1 SV=1
TRINITY_DN17879_c0_g1_i5	1	VPS4	YEASTVacuolar protein sorting-associated protein 4 OS=Saccharomyces cerevisiae (strain ATCC 204508 / S288c) OX=559292 GN=VPS4 PE=1 SV=1
TRINITY_DN2023_c0_g1_i68	1	VPS39	MOUSEVam6/Vps39-like protein OS=Mus musculus OX=10090 GN=Vps39 PE=1 SV=1
TRINITY_DN2023_c0_g1_i70	1	VPS39	MOUSEVam6/Vps39-like protein OS=Mus musculus OX=10090 GN=Vps39 PE=1 SV=1
TRINITY_DN17629_c0_g1_i2	1	VPS35	BOVINVacuolar protein sorting-associated protein 35 OS=Bos taurus OX=9913 GN=VPS35 PE=2 SV=1
TRINITY_DN8153_c0_g1_i5	1	VPS29	XENLAVacuolar protein sorting-associated protein 29 OS=Xenopus laevis OX=8355 GN=vps29 PE=2 SV=1
TRINITY_DN8153_c0_g1_i1	1	VPS29	RATVacuolar protein sorting-associated protein 29 OS=Rattus norvegicus OX=10116 GN=Vps29 PE=1 SV=2
TRINITY_DN1567_c0_g1_i3	1	VPS25	DANREVacuolar protein-sorting-associated protein 25 OS=Danio rerio OX=7955 GN=vps25 PE=2 SV=2
TRINITY_DN1119_c0_g1_i107	1	VPS18	DANREVacuolar protein sorting-associated protein 18 homolog OS=Danio rerio OX=7955 GN=vps18 PE=2 SV=2
TRINITY_DN1119_c0_g1_i28	1	VPS18	DANREVacuolar protein sorting-associated protein 18 homolog OS=Danio rerio OX=7955 GN=vps18 PE=2 SV=2
TRINITY_DN1119_c0_g1_i55	1	VPS18	DANREVacuolar protein sorting-associated protein 18 homolog OS=Danio rerio OX=7955 GN=vps18 PE=2 SV=2
TRINITY_DN1119_c0_g1_i89	1	VPS18	DANREVacuolar protein sorting-associated protein 18 homolog OS=Danio rerio OX=7955 GN=vps18 PE=2 SV=2
TRINITY_DN1119_c0_g1_i100	1	VPS18	DANREVacuolar protein sorting-associated protein 18 homolog OS=Danio rerio OX=7955 GN=vps18 PE=2 SV=2
TRINITY_DN1429_c0_g1_i122	1	VPS16	HUMANVacuolar protein sorting-associated protein 16 homolog OS=Homo sapiens OX=9606 GN=VPS16 PE=1 SV=2
TRINITY_DN1429_c0_g1_i99	1	VPS16	BOVINVacuolar protein sorting-associated protein 16 homolog OS=Bos taurus OX=9913 GN=VPS16 PE=2 SV=1
TRINITY_DN1429_c0_g1_i89	1	VPS16	BOVINVacuolar protein sorting-associated protein 16 homolog OS=Bos taurus OX=9913 GN=VPS16 PE=2 SV=1
TRINITY_DN699_c0_g1_i15	1	VPS11	HUMANVacuolar protein sorting-associated protein 11 homolog OS=Homo sapiens OX=9606 GN=VPS11 PE=1 SV=1
TRINITY_DN699_c0_g1_i13	1	VPS11	HUMANVacuolar protein sorting-associated protein 11 homolog OS=Homo sapiens OX=9606 GN=VPS11 PE=1 SV=1
TRINITY_DN594_c0_g1_i24	1	VPP1	MOUSEV-type proton ATPase 116 kDa subunit a isoform 1 OS=Mus musculus OX=10090 GN=Atp6v0a1 PE=1 SV=3
TRINITY_DN20198_c0_g1_i2	1	VPP1	MOUSEV-type proton ATPase 116 kDa subunit a isoform 1 OS=Mus musculus OX=10090 GN=Atp6v0a1 PE=1 SV=3
TRINITY_DN594_c0_g1_i22	1	VPP1	HUMANV-type proton ATPase 116 kDa subunit a isoform 1 OS=Homo sapiens OX=9606 GN=ATP6V0A1 PE=1 SV=3
TRINITY_DN11028_c0_g1_i1	1	VP13D	HUMANVacuolar protein sorting-associated protein 13D OS=Homo sapiens OX=9606 GN=VPS13D PE=1 SV=2
TRINITY_DN92_c0_g1_i2	1	VP13C	HUMANVacuolar protein sorting-associated protein 13C OS=Homo sapiens OX=9606 GN=VPS13C PE=1 SV=1
TRINITY_DN92_c0_g1_i24	1	VP13C	HUMANVacuolar protein sorting-associated protein 13C OS=Homo sapiens OX=9606 GN=VPS13C PE=1 SV=1
TRINITY_DN92_c3_g1_i1	1	VP13A	MOUSEVacuolar protein sorting-associated protein 13A OS=Mus musculus OX=10090 GN=Vps13a PE=1 SV=1
TRINITY_DN3542_c0_g2_i2	1	VMA5A	HUMANvon Willebrand factor A domain-containing protein 5A OS=Homo sapiens OX=9606 GN=VWA5A PE=2 SV=2
TRINITY_DN31646_c0_g2_i5	1	VMA5A	HUMANvon Willebrand factor A domain-containing protein 5A OS=Homo sapiens OX=9606 GN=VWA5A PE=2 SV=2
TRINITY_DN10927_c0_g1_i10	1	VM3SA	TRISTZinc metalloproteinase-disintegrin-like stejnihagin-A OS=Trimeresurus stejnegeri OX=39682 PE=2 SV=1
TRINITY_DN11192_c0_g1_i1	1	VM3SA	TRISTZinc metalloproteinase-disintegrin-like stejnihagin-A OS=Trimeresurus stejnegeri OX=39682 PE=2 SV=1
TRINITY_DN8843_c0_g1_i9	1	VKT52	ANESUKappaPI-actitoxin-Avd3a OS=Anemonia sulcata OX=6108 PE=1 SV=2
TRINITY_DN9205_c0_g1_i7	1	VKT5	ANEVIU-actitoxin-Avd3h OS=Anemonia viridis OX=51769 PE=3 SV=1
TRINITY_DN9205_c0_g1_i12	1	VKT5	ANEVIU-actitoxin-Avd3h OS=Anemonia viridis OX=51769 PE=3 SV=1
TRINITY_DN9205_c0_g1_i10	1	VKT5	ANEVIU-actitoxin-Avd3h OS=Anemonia viridis OX=51769 PE=3 SV=1
TRINITY_DN9205_c0_g1_i13	1	VKT5	ANEVIU-actitoxin-Avd3h OS=Anemonia viridis OX=51769 PE=3 SV=1
TRINITY_DN9205_c0_g1_i17	1	VKT5	ANEVIU-actitoxin-Avd3h OS=Anemonia viridis OX=51769 PE=3 SV=1
TRINITY_DN13497_c0_g1_i10	1	VKOR1	HUMANVitamin K epoxide reductase complex subunit 1 OS=Homo sapiens OX=9606 GN=VKORC1 PE=1 SV=1
TRINITY_DN72675_c0_g1_i1	1	VIPP1	ARATHMembrane-associated protein VIPP1, chloroplastic OS=Arabidopsis thaliana OX=3702 GN=VIPP1 PE=1 SV=1
TRINITY_DN27045_c0_g1_i4	1	VIP2	XENLAInositol hexakisphosphate and diphosphoinositol-pentakisphosphate kinase 2 OS=Xenopus laevis OX=8355 GN=ppip5k2 PE=2 SV=1
TRINITY_DN6_c0_g1_i26	1	VIP2	HUMANInositol hexakisphosphate and diphosphoinositol-pentakisphosphate kinase 2 OS=Homo sapiens OX=9606 GN=PPIP5K2 PE=1 SV=3
TRINITY_DN27045_c0_g1_i1	1	VIP2	HUMANInositol hexakisphosphate and diphosphoinositol-pentakisphosphate kinase 2 OS=Homo sapiens OX=9606 GN=PPIP5K2 PE=1 SV=3
TRINITY_DN6_c0_g1_i11	1	VIP2	HUMANInositol hexakisphosphate and diphosphoinositol-pentakisphosphate kinase 2 OS=Homo sapiens OX=9606 GN=PPIP5K2 PE=1 SV=3
TRINITY_DN2692_c0_g1_i1	1	VINC	MOUSEVinculin OS=Mus musculus OX=10090 GN=Vcl PE=1 SV=4
TRINITY_DN383_c0_g1_i156	1	VIGLN	HUMANVigilin OS=Homo sapiens OX=9606 GN=HDLBP PE=1 SV=2
TRINITY_DN383_c0_g1_i23	1	VIGLN	HUMANVigilin OS=Homo sapiens OX=9606 GN=HDLBP PE=1 SV=2
TRINITY_DN383_c0_g1_i18	1	VIGLN	HUMANVigilin OS=Homo sapiens OX=9606 GN=HDLBP PE=1 SV=2
TRINITY_DN383_c0_g1_i25	1	VIGLN	HUMANVigilin OS=Homo sapiens OX=9606 GN=HDLBP PE=1 SV=2
TRINITY_DN583_c0_g1_i9	1	VDE	TOBACViolaxanthin de-epoxidase, chloroplastic OS=Nicotiana tabacum OX=4097 GN=VDE1 PE=2 SV=1
TRINITY_DN583_c0_g1_i35	1	VDE	TOBACViolaxanthin de-epoxidase, chloroplastic OS=Nicotiana tabacum OX=4097 GN=VDE1 PE=2 SV=1
TRINITY_DN7541_c0_g1_i9	1	VDAC2	XENLAVoltage-dependent anion-selective channel protein 2 OS=Xenopus laevis OX=8355 GN=vdac2 PE=1 SV=1
TRINITY_DN708_c0_g1_i3	1	VCP	VACCCComplement control protein C3 OS=Vaccinia virus (strain Copenhagen) OX=10249 GN=C3L PE=1 SV=1
TRINITY_DN5501_c0_g1_i15	1	VCP	VACCCComplement control protein C3 OS=Vaccinia virus (strain Copenhagen) OX=10249 GN=C3L PE=1 SV=1
TRINITY_DN59118_c0_g1_i1	1	VCP	VACCCComplement control protein C3 OS=Vaccinia virus (strain Copenhagen) OX=10249 GN=C3L PE=1 SV=1
TRINITY_DN15997_c0_g1_i2	1	VCP	VACCCComplement control protein C3 OS=Vaccinia virus (strain Copenhagen) OX=10249 GN=C3L PE=1 SV=1
TRINITY_DN34830_c1_g1_i6	1	VCP	VACCCComplement control protein C3 OS=Vaccinia virus (strain Copenhagen) OX=10249 GN=C3L PE=1 SV=1
TRINITY_DN40893_c0_g1_i12	1	VCP	VACCCComplement control protein C3 OS=Vaccinia virus (strain Copenhagen) OX=10249 GN=C3L PE=1 SV=1
TRINITY_DN19485_c0_g1_i5	1	VCP	VACCCComplement control protein C3 OS=Vaccinia virus (strain Copenhagen) OX=10249 GN=C3L PE=1 SV=1
TRINITY_DN3821_c0_g1_i13	1	VCAM1	HUMANVascular cell adhesion protein 1 OS=Homo sapiens OX=9606 GN=VCAM1 PE=1 SV=1
TRINITY_DN2040_c0_g1_i5	1	VAV2	HUMANGuanine nucleotide exchange factor VAV2 OS=Homo sapiens OX=9606 GN=VAV2 PE=1 SV=2
TRINITY_DN2040_c0_g1_i1	1	VAV2	HUMANGuanine nucleotide exchange factor VAV2 OS=Homo sapiens OX=9606 GN=VAV2 PE=1 SV=2
TRINITY_DN4173_c0_g1_i12	1	VATH	PIGV-type proton ATPase subunit H OS=Sus scrofa OX=9823 GN=ATP6V1H PE=2 SV=1
TRINITY_DN4173_c0_g1_i1	1	VATH	MANSEV-type proton ATPase subunit H OS=Manduca sexta OX=7130 PE=2 SV=1
TRINITY_DN13_c5_g1_i2	1	VATC2	RATV-type proton ATPase subunit C 2 OS=Rattus norvegicus OX=10116 GN=Atp6v1c2 PE=2 SV=1
TRINITY_DN13_c5_g1_i18	1	VATC1	BOVINV-type proton ATPase subunit C 1 OS=Bos taurus OX=9913 GN=ATP6V1C1 PE=1 SV=3
TRINITY_DN3240_c0_g1_i8	1	VATB	MANSEV-type proton ATPase subunit B OS=Manduca sexta OX=7130 GN=VHA55 PE=2 SV=1
TRINITY_DN3240_c0_g1_i1	1	VATB	MANSEV-type proton ATPase subunit B OS=Manduca sexta OX=7130 GN=VHA55 PE=2 SV=1
TRINITY_DN4906_c0_g1_i4	1	VASH2	HUMANTubulinyl-Tyr carboxypeptidase 2 OS=Homo sapiens OX=9606 GN=VASH2 PE=1 SV=2
TRINITY_DN1311_c0_g1_i9	1	VAMP3	MOUSEVesicle-associated membrane protein 3 OS=Mus musculus OX=10090 GN=Vamp3 PE=1 SV=1
TRINITY_DN867_c0_g1_i38	1	VAC14	CHICKProtein VAC14 homolog OS=Gallus gallus OX=9031 GN=VAC14 PE=2 SV=1
TRINITY_DN867_c0_g1_i27	1	VAC14	CHICKProtein VAC14 homolog OS=Gallus gallus OX=9031 GN=VAC14 PE=2 SV=1
TRINITY_DN20171_c0_g1_i98	1	VA0D1	DROMEV-type proton ATPase subunit d 1 OS=Drosophila melanogaster OX=7227 GN=VhaAC39-1 PE=2 SV=1
TRINITY_DN20171_c0_g1_i1	1	VA0D1	DROMEV-type proton ATPase subunit d 1 OS=Drosophila melanogaster OX=7227 GN=VhaAC39-1 PE=2 SV=1
TRINITY_DN20171_c0_g1_i13	1	VA0D1	DROMEV-type proton ATPase subunit d 1 OS=Drosophila melanogaster OX=7227 GN=VhaAC39-1 PE=2 SV=1
TRINITY_DN34552_c0_g1_i2	1	V244	FOWPNPutative ankyrin repeat protein FPV244 OS=Fowlpox virus (strain NVSL) OX=928301 GN=FPV244 PE=4 SV=1
TRINITY_DN31102_c0_g1_i15	1	V212	FOWPNProbable serine/threonine-protein kinase FPV212 OS=Fowlpox virus (strain NVSL) OX=928301 GN=FPV212 PE=3 SV=1
TRINITY_DN234_c18_g1_i2	1	V031	FOWPNPutative ankyrin repeat protein FPV031 OS=Fowlpox virus (strain NVSL) OX=928301 GN=ANK3 PE=4 SV=1
TRINITY_DN130885_c0_g1_i1	1	UXS1	HUMANUDP-glucuronic acid decarboxylase 1 OS=Homo sapiens OX=9606 GN=UXS1 PE=1 SV=1
TRINITY_DN4616_c0_g1_i30	1	UVSSA	MOUSEUV-stimulated scaffold protein A OS=Mus musculus OX=10090 GN=Uvssa PE=1 SV=2
TRINITY_DN3976_c0_g1_i56	1	UVS2	XENLAEmbryonic protein UVS.2 OS=Xenopus laevis OX=8355 PE=2 SV=2
TRINITY_DN1954_c0_g1_i16	1	UVR8	ARATHUltraviolet-B receptor UVR8 OS=Arabidopsis thaliana OX=3702 GN=UVR8 PE=1 SV=1
TRINITY_DN131438_c0_g1_i1	1	UVR8	ARATHUltraviolet-B receptor UVR8 OS=Arabidopsis thaliana OX=3702 GN=UVR8 PE=1 SV=1
TRINITY_DN1954_c0_g1_i13	1	UVR8	ARATHUltraviolet-B receptor UVR8 OS=Arabidopsis thaliana OX=3702 GN=UVR8 PE=1 SV=1
TRINITY_DN27949_c0_g1_i13	1	UTP7	SCHPOProbable U3 small nucleolar RNA-associated protein 7 OS=Schizosaccharomyces pombe (strain 972 / ATCC 24843) OX=284812 GN=utp7 PE=3 SV=1
TRINITY_DN19025_c0_g1_i11	1	UTP23	MOUSErRNA-processing protein UTP23 homolog OS=Mus musculus OX=10090 GN=Utp23 PE=2 SV=1
TRINITY_DN19025_c0_g1_i15	1	UTP23	HUMANrRNA-processing protein UTP23 homolog OS=Homo sapiens OX=9606 GN=UTP23 PE=1 SV=2
TRINITY_DN11823_c0_g1_i2	1	UTP18	HUMANU3 small nucleolar RNA-associated protein 18 homolog OS=Homo sapiens OX=9606 GN=UTP18 PE=1 SV=3
TRINITY_DN6082_c0_g1_i11	1	UTP15	SCHPOU3 small nucleolar RNA-associated protein 15 OS=Schizosaccharomyces pombe (strain 972 / ATCC 24843) OX=284812 GN=utp15 PE=3 SV=1
TRINITY_DN9365_c0_g1_i5	1	UT14C	HUMANU3 small nucleolar RNA-associated protein 14 homolog C OS=Homo sapiens OX=9606 GN=UTP14C PE=1 SV=1
TRINITY_DN53_c0_g1_i3	1	USP9X	MOUSEProbable ubiquitin carboxyl-terminal hydrolase FAF-X OS=Mus musculus OX=10090 GN=Usp9x PE=1 SV=2
TRINITY_DN53_c0_g1_i12	1	USP9X	MOUSEProbable ubiquitin carboxyl-terminal hydrolase FAF-X OS=Mus musculus OX=10090 GN=Usp9x PE=1 SV=2
TRINITY_DN53_c0_g1_i18	1	USP9X	MOUSEProbable ubiquitin carboxyl-terminal hydrolase FAF-X OS=Mus musculus OX=10090 GN=Usp9x PE=1 SV=2
TRINITY_DN53_c0_g1_i16	1	USP9X	MOUSEProbable ubiquitin carboxyl-terminal hydrolase FAF-X OS=Mus musculus OX=10090 GN=Usp9x PE=1 SV=2
TRINITY_DN23943_c0_g1_i1	1	USH2A	RATUsherin OS=Rattus norvegicus OX=10116 GN=Ush2a PE=1 SV=2
TRINITY_DN35388_c0_g1_i1	1	USH2A	RATUsherin OS=Rattus norvegicus OX=10116 GN=Ush2a PE=1 SV=2
TRINITY_DN1711_c0_g1_i3	1	USH2A	MOUSEUsherin OS=Mus musculus OX=10090 GN=Ush2A PE=1 SV=2
TRINITY_DN5088_c0_g1_i5	1	USH2A	MOUSEUsherin OS=Mus musculus OX=10090 GN=Ush2A PE=1 SV=2
TRINITY_DN10205_c0_g1_i13	1	USH2A	HUMANUsherin OS=Homo sapiens OX=9606 GN=USH2A PE=1 SV=3
TRINITY_DN42598_c0_g1_i2	1	USH2A	HUMANUsherin OS=Homo sapiens OX=9606 GN=USH2A PE=1 SV=3
TRINITY_DN42598_c0_g1_i1	1	USH2A	HUMANUsherin OS=Homo sapiens OX=9606 GN=USH2A PE=1 SV=3
TRINITY_DN28759_c0_g1_i1	1	USH2A	HUMANUsherin OS=Homo sapiens OX=9606 GN=USH2A PE=1 SV=3
TRINITY_DN9448_c0_g1_i9	1	USH2A	HUMANUsherin OS=Homo sapiens OX=9606 GN=USH2A PE=1 SV=3
TRINITY_DN20444_c0_g1_i6	1	USF	STRPUUpstream stimulatory factor OS=Strongylocentrotus purpuratus OX=7668 PE=2 SV=1
TRINITY_DN15876_c1_g1_i5	1	US6NL	MOUSEUSP6 N-terminal-like protein OS=Mus musculus OX=10090 GN=Usp6nl PE=1 SV=2
TRINITY_DN1374_c0_g1_i5	1	US6NL	MOUSEUSP6 N-terminal-like protein OS=Mus musculus OX=10090 GN=Usp6nl PE=1 SV=2
TRINITY_DN15522_c0_g1_i2	1	US6NL	HUMANUSP6 N-terminal-like protein OS=Homo sapiens OX=9606 GN=USP6NL PE=1 SV=3
TRINITY_DN23000_c0_g1_i3	1	UROM	HUMANUromodulin OS=Homo sapiens OX=9606 GN=UMOD PE=1 SV=1
TRINITY_DN55825_c0_g1_i18	1	UROK	CHICKUrokinase-type plasminogen activator OS=Gallus gallus OX=9031 GN=PLAU PE=2 SV=1
TRINITY_DN4764_c0_g1_i20	1	URIC	DROPSUricase OS=Drosophila pseudoobscura pseudoobscura OX=46245 GN=Uro PE=2 SV=2
TRINITY_DN4764_c0_g1_i21	1	URIC	CANLFUricase OS=Canis lupus familiaris OX=9615 GN=UOX PE=1 SV=3
TRINITY_DN12169_c0_g1_i19	1	UPL1	ARATHE3 ubiquitin-protein ligase UPL1 OS=Arabidopsis thaliana OX=3702 GN=UPL1 PE=1 SV=3
TRINITY_DN2860_c0_g1_i3	1	UNK	MOUSERING finger protein unkempt homolog OS=Mus musculus OX=10090 GN=Unk PE=1 SV=1
TRINITY_DN2860_c0_g1_i6	1	UNK	MOUSERING finger protein unkempt homolog OS=Mus musculus OX=10090 GN=Unk PE=1 SV=1
TRINITY_DN19538_c1_g1_i4	1	UNC89	CAEELMuscle M-line assembly protein unc-89 OS=Caenorhabditis elegans OX=6239 GN=unc-89 PE=1 SV=3
TRINITY_DN22798_c0_g1_i1	1	UNC89	CAEELMuscle M-line assembly protein unc-89 OS=Caenorhabditis elegans OX=6239 GN=unc-89 PE=1 SV=3
TRINITY_DN3224_c0_g1_i34	1	UNC89	CAEELMuscle M-line assembly protein unc-89 OS=Caenorhabditis elegans OX=6239 GN=unc-89 PE=1 SV=3
TRINITY_DN1293_c2_g1_i2	1	UNC89	CAEELMuscle M-line assembly protein unc-89 OS=Caenorhabditis elegans OX=6239 GN=unc-89 PE=1 SV=3
TRINITY_DN1967_c0_g1_i19	1	UNC89	CAEELMuscle M-line assembly protein unc-89 OS=Caenorhabditis elegans OX=6239 GN=unc-89 PE=1 SV=3
TRINITY_DN1293_c2_g1_i5	1	UNC89	CAEELMuscle M-line assembly protein unc-89 OS=Caenorhabditis elegans OX=6239 GN=unc-89 PE=1 SV=3
TRINITY_DN19538_c1_g1_i2	1	UNC89	CAEELMuscle M-line assembly protein unc-89 OS=Caenorhabditis elegans OX=6239 GN=unc-89 PE=1 SV=3
TRINITY_DN21681_c0_g1_i20	1	UNC89	CAEELMuscle M-line assembly protein unc-89 OS=Caenorhabditis elegans OX=6239 GN=unc-89 PE=1 SV=3
TRINITY_DN3224_c0_g1_i39	1	UNC89	CAEELMuscle M-line assembly protein unc-89 OS=Caenorhabditis elegans OX=6239 GN=unc-89 PE=1 SV=3
TRINITY_DN15991_c0_g1_i10	1	UNC89	CAEELMuscle M-line assembly protein unc-89 OS=Caenorhabditis elegans OX=6239 GN=unc-89 PE=1 SV=3
TRINITY_DN19538_c0_g1_i1	1	UNC89	CAEELMuscle M-line assembly protein unc-89 OS=Caenorhabditis elegans OX=6239 GN=unc-89 PE=1 SV=3
TRINITY_DN73_c3_g1_i8	1	UNC89	CAEELMuscle M-line assembly protein unc-89 OS=Caenorhabditis elegans OX=6239 GN=unc-89 PE=1 SV=3
TRINITY_DN15991_c0_g1_i5	1	UNC89	CAEELMuscle M-line assembly protein unc-89 OS=Caenorhabditis elegans OX=6239 GN=unc-89 PE=1 SV=3
TRINITY_DN243_c8_g1_i22	1	UNC89	CAEELMuscle M-line assembly protein unc-89 OS=Caenorhabditis elegans OX=6239 GN=unc-89 PE=1 SV=3
TRINITY_DN10927_c0_g1_i6	1	UNC71	CAEELDisintegrin and metalloproteinase domain-containing protein unc-71 OS=Caenorhabditis elegans OX=6239 GN=unc-71 PE=1 SV=1
TRINITY_DN11278_c0_g1_i11	1	UNC22	CAEELTwitchin OS=Caenorhabditis elegans OX=6239 GN=unc-22 PE=1 SV=3
TRINITY_DN98309_c0_g1_i1	1	UNC22	CAEELTwitchin OS=Caenorhabditis elegans OX=6239 GN=unc-22 PE=1 SV=3
TRINITY_DN1528_c0_g1_i54	1	UN13D	MOUSEProtein unc-13 homolog D OS=Mus musculus OX=10090 GN=Unc13d PE=1 SV=2
TRINITY_DN1451_c0_g1_i10	1	UN13B	MOUSEProtein unc-13 homolog B OS=Mus musculus OX=10090 GN=Unc13b PE=1 SV=2
TRINITY_DN1451_c0_g1_i14	1	UN13B	MOUSEProtein unc-13 homolog B OS=Mus musculus OX=10090 GN=Unc13b PE=1 SV=2
TRINITY_DN19692_c0_g1_i8	1	UN13B	DROMEProtein unc-13 homolog 4B OS=Drosophila melanogaster OX=7227 GN=stac PE=1 SV=5
TRINITY_DN1528_c0_g1_i51	1	UN13B	DROMEProtein unc-13 homolog 4B OS=Drosophila melanogaster OX=7227 GN=stac PE=1 SV=5
TRINITY_DN8390_c0_g1_i5	1	UN13B	DROMEProtein unc-13 homolog 4B OS=Drosophila melanogaster OX=7227 GN=stac PE=1 SV=5
TRINITY_DN19692_c0_g1_i4	1	UN13B	DROMEProtein unc-13 homolog 4B OS=Drosophila melanogaster OX=7227 GN=stac PE=1 SV=5
TRINITY_DN19692_c0_g1_i7	1	UN13B	DROMEProtein unc-13 homolog 4B OS=Drosophila melanogaster OX=7227 GN=stac PE=1 SV=5
TRINITY_DN7506_c0_g1_i17	1	UMPS	PONABUridine 5'-monophosphate synthase OS=Pongo abelii OX=9601 GN=UMPS PE=2 SV=1
TRINITY_DN1103_c0_g1_i44	1	ULK1	MOUSESerine/threonine-protein kinase ULK1 OS=Mus musculus OX=10090 GN=Ulk1 PE=1 SV=1
TRINITY_DN414_c0_g1_i40	1	ULK1	HUMANSerine/threonine-protein kinase ULK1 OS=Homo sapiens OX=9606 GN=ULK1 PE=1 SV=2
TRINITY_DN414_c0_g1_i5	1	ULK1	HUMANSerine/threonine-protein kinase ULK1 OS=Homo sapiens OX=9606 GN=ULK1 PE=1 SV=2
TRINITY_DN414_c0_g1_i3	1	ULK1	HUMANSerine/threonine-protein kinase ULK1 OS=Homo sapiens OX=9606 GN=ULK1 PE=1 SV=2
TRINITY_DN42672_c0_g1_i4	1	UHRF1	XENLAE3 ubiquitin-protein ligase UHRF1 OS=Xenopus laevis OX=8355 GN=uhrf1 PE=2 SV=1
TRINITY_DN42672_c0_g1_i2	1	UHRF1	XENLAE3 ubiquitin-protein ligase UHRF1 OS=Xenopus laevis OX=8355 GN=uhrf1 PE=2 SV=1
TRINITY_DN113_c4_g1_i3	1	UHRF1	XENLAE3 ubiquitin-protein ligase UHRF1 OS=Xenopus laevis OX=8355 GN=uhrf1 PE=2 SV=1
TRINITY_DN18454_c0_g1_i1	1	UHRF1	DANREE3 ubiquitin-protein ligase UHRF1 OS=Danio rerio OX=7955 GN=uhrf1 PE=1 SV=1
TRINITY_DN117001_c0_g1_i1	1	UGPC	RHOS1sn-glycerol-3-phosphate import ATP-binding protein UgpC OS=Rhodobacter sphaeroides (strain ATCC 17029 / ATH 2.4.9) OX=349101 GN=ugpC PE=3 SV=1
TRINITY_DN1433_c0_g1_i25	1	UFSP2	PONABUfm1-specific protease 2 OS=Pongo abelii OX=9601 GN=UFSP2 PE=2 SV=3
TRINITY_DN1433_c0_g1_i18	1	UFSP2	PONABUfm1-specific protease 2 OS=Pongo abelii OX=9601 GN=UFSP2 PE=2 SV=3
TRINITY_DN4103_c0_g1_i3	1	UFO	HUMANTyrosine-protein kinase receptor UFO OS=Homo sapiens OX=9606 GN=AXL PE=1 SV=4
TRINITY_DN20826_c0_g1_i7	1	UFO	HUMANTyrosine-protein kinase receptor UFO OS=Homo sapiens OX=9606 GN=AXL PE=1 SV=4
TRINITY_DN847_c0_g1_i179	1	UFL1	TRIADE3 UFM1-protein ligase 1 homolog OS=Trichoplax adhaerens OX=10228 GN=TRIADDRAFT
TRINITY_DN847_c0_g1_i205	1	UFL1	TRIADE3 UFM1-protein ligase 1 homolog OS=Trichoplax adhaerens OX=10228 GN=TRIADDRAFT
TRINITY_DN847_c0_g1_i156	1	UFL1	TRIADE3 UFM1-protein ligase 1 homolog OS=Trichoplax adhaerens OX=10228 GN=TRIADDRAFT
TRINITY_DN847_c0_g1_i39	1	UFL1	TRIADE3 UFM1-protein ligase 1 homolog OS=Trichoplax adhaerens OX=10228 GN=TRIADDRAFT
TRINITY_DN847_c0_g1_i184	1	UFL1	NEMVEE3 UFM1-protein ligase 1 homolog OS=Nematostella vectensis OX=45351 GN=v1g184952 PE=3 SV=1
TRINITY_DN847_c0_g1_i141	1	UFL1	NEMVEE3 UFM1-protein ligase 1 homolog OS=Nematostella vectensis OX=45351 GN=v1g184952 PE=3 SV=1
TRINITY_DN847_c0_g1_i38	1	UFL1	NEMVEE3 UFM1-protein ligase 1 homolog OS=Nematostella vectensis OX=45351 GN=v1g184952 PE=3 SV=1
TRINITY_DN5559_c0_g1_i1	1	UFD4	DROMEE3 ubiquitin-protein ligase Ufd4 OS=Drosophila melanogaster OX=7227 GN=Ufd4 PE=2 SV=1
TRINITY_DN1963_c1_g1_i27	1	UFD1	DICDIUbiquitin fusion degradation protein 1 homolog OS=Dictyostelium discoideum OX=44689 GN=ufd1 PE=3 SV=1
TRINITY_DN2364_c0_g1_i7	1	UD2A3	MOUSEUDP-glucuronosyltransferase 2A3 OS=Mus musculus OX=10090 GN=Ugt2a3 PE=1 SV=1
TRINITY_DN24027_c0_g1_i1	1	UCRI	SYNPXCytochrome b6-f complex iron-sulfur subunit OS=Synechococcus sp. (strain WH8102) OX=84588 GN=petC PE=3 SV=1
TRINITY_DN24027_c0_g1_i2	1	UCRI	SYNPXCytochrome b6-f complex iron-sulfur subunit OS=Synechococcus sp. (strain WH8102) OX=84588 GN=petC PE=3 SV=1
TRINITY_DN65029_c0_g1_i1	1	UCRI	RHOSHUbiquinol-cytochrome c reductase iron-sulfur subunit OS=Rhodobacter sphaeroides OX=1063 GN=petA PE=1 SV=1
TRINITY_DN2417_c1_g1_i7	1	UCRI	AOTAZCytochrome b-c1 complex subunit Rieske, mitochondrial OS=Aotus azarae OX=30591 GN=UQCRFS1 PE=3 SV=1
TRINITY_DN2417_c1_g1_i4	1	UCRI	AOTAZCytochrome b-c1 complex subunit Rieske, mitochondrial OS=Aotus azarae OX=30591 GN=UQCRFS1 PE=3 SV=1
TRINITY_DN55314_c0_g1_i1	1	UCRI	ALLVDUbiquinol-cytochrome c reductase iron-sulfur subunit OS=Allochromatium vinosum (strain ATCC 17899 / DSM 180 / NBRC 103801 / NCIMB 10441 / D) OX=572477 GN=petA PE=3 SV=2
TRINITY_DN65861_c0_g1_i1	1	UCRI	ALLVDUbiquinol-cytochrome c reductase iron-sulfur subunit OS=Allochromatium vinosum (strain ATCC 17899 / DSM 180 / NBRC 103801 / NCIMB 10441 / D) OX=572477 GN=petA PE=3 SV=2
TRINITY_DN8999_c0_g2_i2	1	UCP4	HUMANMitochondrial uncoupling protein 4 OS=Homo sapiens OX=9606 GN=SLC25A27 PE=2 SV=1
TRINITY_DN8999_c0_g2_i3	1	UCP4	HUMANMitochondrial uncoupling protein 4 OS=Homo sapiens OX=9606 GN=SLC25A27 PE=2 SV=1
TRINITY_DN6950_c0_g1_i14	1	UCKL1	MOUSEUridine-cytidine kinase-like 1 OS=Mus musculus OX=10090 GN=Uckl1 PE=1 SV=1
TRINITY_DN1924_c0_g1_i6	1	UCHL5	MOUSEUbiquitin carboxyl-terminal hydrolase isozyme L5 OS=Mus musculus OX=10090 GN=Uchl5 PE=1 SV=2
TRINITY_DN1924_c0_g1_i14	1	UCHL5	MOUSEUbiquitin carboxyl-terminal hydrolase isozyme L5 OS=Mus musculus OX=10090 GN=Uchl5 PE=1 SV=2
TRINITY_DN33155_c0_g1_i6	1	UCHL3	HUMANUbiquitin carboxyl-terminal hydrolase isozyme L3 OS=Homo sapiens OX=9606 GN=UCHL3 PE=1 SV=1
TRINITY_DN7524_c0_g1_i7	1	UBXN7	HUMANUBX domain-containing protein 7 OS=Homo sapiens OX=9606 GN=UBXN7 PE=1 SV=2
TRINITY_DN4362_c0_g1_i1	1	UBXN6	BOVINUBX domain-containing protein 6 OS=Bos taurus OX=9913 GN=UBXN6 PE=2 SV=1
TRINITY_DN3464_c0_g1_i5	1	UBXN4	CAEELUBX domain-containing protein 4 OS=Caenorhabditis elegans OX=6239 GN=ubxn-4 PE=1 SV=1
TRINITY_DN3464_c0_g1_i3	1	UBXN4	CAEELUBX domain-containing protein 4 OS=Caenorhabditis elegans OX=6239 GN=ubxn-4 PE=1 SV=1
TRINITY_DN4520_c0_g1_i107	1	UBX1B	XENLAUBX domain-containing protein 1-B OS=Xenopus laevis OX=8355 GN=ubxn1-b PE=2 SV=1
TRINITY_DN4520_c0_g1_i3	1	UBX1A	XENLAUBX domain-containing protein 1-A OS=Xenopus laevis OX=8355 GN=ubxn1-a PE=2 SV=1
TRINITY_DN6805_c0_g1_i41	1	UBX11	MOUSEUBX domain-containing protein 11 OS=Mus musculus OX=10090 GN=Ubxn11 PE=1 SV=1
TRINITY_DN6782_c0_g1_i11	1	UBTD1	XENLAUbiquitin domain-containing protein 1 OS=Xenopus laevis OX=8355 GN=ubtd1 PE=2 SV=1
TRINITY_DN20476_c0_g1_i1	1	UBR4	RATE3 ubiquitin-protein ligase UBR4 OS=Rattus norvegicus OX=10116 GN=Ubr4 PE=1 SV=2
TRINITY_DN27793_c0_g1_i2	1	UBR4	MOUSEE3 ubiquitin-protein ligase UBR4 OS=Mus musculus OX=10090 GN=Ubr4 PE=1 SV=1
TRINITY_DN23454_c0_g1_i14	1	UBR4	MOUSEE3 ubiquitin-protein ligase UBR4 OS=Mus musculus OX=10090 GN=Ubr4 PE=1 SV=1
TRINITY_DN15025_c0_g1_i1	1	UBR4	MOUSEE3 ubiquitin-protein ligase UBR4 OS=Mus musculus OX=10090 GN=Ubr4 PE=1 SV=1
TRINITY_DN15567_c0_g3_i6	1	UBR4	MOUSEE3 ubiquitin-protein ligase UBR4 OS=Mus musculus OX=10090 GN=Ubr4 PE=1 SV=1
TRINITY_DN26863_c0_g1_i3	1	UBR4	MOUSEE3 ubiquitin-protein ligase UBR4 OS=Mus musculus OX=10090 GN=Ubr4 PE=1 SV=1
TRINITY_DN23454_c0_g1_i13	1	UBR4	MOUSEE3 ubiquitin-protein ligase UBR4 OS=Mus musculus OX=10090 GN=Ubr4 PE=1 SV=1
TRINITY_DN15567_c0_g3_i5	1	UBR4	MOUSEE3 ubiquitin-protein ligase UBR4 OS=Mus musculus OX=10090 GN=Ubr4 PE=1 SV=1
TRINITY_DN26863_c0_g1_i8	1	UBR4	MOUSEE3 ubiquitin-protein ligase UBR4 OS=Mus musculus OX=10090 GN=Ubr4 PE=1 SV=1
TRINITY_DN16587_c0_g1_i2	1	UBR4	MOUSEE3 ubiquitin-protein ligase UBR4 OS=Mus musculus OX=10090 GN=Ubr4 PE=1 SV=1
TRINITY_DN27793_c0_g1_i3	1	UBR4	MOUSEE3 ubiquitin-protein ligase UBR4 OS=Mus musculus OX=10090 GN=Ubr4 PE=1 SV=1
TRINITY_DN26863_c0_g1_i1	1	UBR4	MOUSEE3 ubiquitin-protein ligase UBR4 OS=Mus musculus OX=10090 GN=Ubr4 PE=1 SV=1
TRINITY_DN15567_c0_g3_i7	1	UBR4	MOUSEE3 ubiquitin-protein ligase UBR4 OS=Mus musculus OX=10090 GN=Ubr4 PE=1 SV=1
TRINITY_DN12857_c0_g1_i3	1	UBR4	HUMANE3 ubiquitin-protein ligase UBR4 OS=Homo sapiens OX=9606 GN=UBR4 PE=1 SV=1
TRINITY_DN891_c1_g1_i28	1	UBR4	HUMANE3 ubiquitin-protein ligase UBR4 OS=Homo sapiens OX=9606 GN=UBR4 PE=1 SV=1
TRINITY_DN22911_c0_g1_i7	1	UBR4	HUMANE3 ubiquitin-protein ligase UBR4 OS=Homo sapiens OX=9606 GN=UBR4 PE=1 SV=1
TRINITY_DN891_c1_g1_i42	1	UBR4	HUMANE3 ubiquitin-protein ligase UBR4 OS=Homo sapiens OX=9606 GN=UBR4 PE=1 SV=1
TRINITY_DN10388_c0_g1_i1	1	UBR4	HUMANE3 ubiquitin-protein ligase UBR4 OS=Homo sapiens OX=9606 GN=UBR4 PE=1 SV=1
TRINITY_DN891_c1_g1_i13	1	UBR4	HUMANE3 ubiquitin-protein ligase UBR4 OS=Homo sapiens OX=9606 GN=UBR4 PE=1 SV=1
TRINITY_DN22911_c0_g1_i8	1	UBR4	HUMANE3 ubiquitin-protein ligase UBR4 OS=Homo sapiens OX=9606 GN=UBR4 PE=1 SV=1
TRINITY_DN10388_c0_g1_i15	1	UBR4	HUMANE3 ubiquitin-protein ligase UBR4 OS=Homo sapiens OX=9606 GN=UBR4 PE=1 SV=1
TRINITY_DN1324_c0_g1_i24	1	UBR2	HUMANE3 ubiquitin-protein ligase UBR2 OS=Homo sapiens OX=9606 GN=UBR2 PE=1 SV=1
TRINITY_DN1324_c0_g1_i50	1	UBR2	HUMANE3 ubiquitin-protein ligase UBR2 OS=Homo sapiens OX=9606 GN=UBR2 PE=1 SV=1
TRINITY_DN1670_c1_g1_i16	1	UBQ8	ARATHPolyubiquitin 8 OS=Arabidopsis thaliana OX=3702 GN=UBQ8 PE=3 SV=1
TRINITY_DN2915_c1_g1_i4	1	UBP8	HUMANUbiquitin carboxyl-terminal hydrolase 8 OS=Homo sapiens OX=9606 GN=USP8 PE=1 SV=1
TRINITY_DN8291_c0_g1_i1	1	UBP5	HUMANUbiquitin carboxyl-terminal hydrolase 5 OS=Homo sapiens OX=9606 GN=USP5 PE=1 SV=2
TRINITY_DN3724_c0_g1_i1	1	UBP5	HUMANUbiquitin carboxyl-terminal hydrolase 5 OS=Homo sapiens OX=9606 GN=USP5 PE=1 SV=2
TRINITY_DN9383_c0_g1_i7	1	UBP5	HUMANUbiquitin carboxyl-terminal hydrolase 5 OS=Homo sapiens OX=9606 GN=USP5 PE=1 SV=2
TRINITY_DN34375_c1_g1_i2	1	UBP5	HUMANUbiquitin carboxyl-terminal hydrolase 5 OS=Homo sapiens OX=9606 GN=USP5 PE=1 SV=2
TRINITY_DN7214_c0_g1_i104	1	UBP48	HUMANUbiquitin carboxyl-terminal hydrolase 48 OS=Homo sapiens OX=9606 GN=USP48 PE=1 SV=1
TRINITY_DN16253_c0_g1_i27	1	UBP47	CHICKUbiquitin carboxyl-terminal hydrolase 47 OS=Gallus gallus OX=9031 GN=USP47 PE=3 SV=1
TRINITY_DN16253_c0_g1_i28	1	UBP47	CHICKUbiquitin carboxyl-terminal hydrolase 47 OS=Gallus gallus OX=9031 GN=USP47 PE=3 SV=1
TRINITY_DN16253_c0_g1_i75	1	UBP47	CHICKUbiquitin carboxyl-terminal hydrolase 47 OS=Gallus gallus OX=9031 GN=USP47 PE=3 SV=1
TRINITY_DN3739_c1_g1_i35	1	UBP46	RATUbiquitin carboxyl-terminal hydrolase 46 OS=Rattus norvegicus OX=10116 GN=Usp46 PE=1 SV=2
TRINITY_DN3739_c1_g1_i9	1	UBP46	RATUbiquitin carboxyl-terminal hydrolase 46 OS=Rattus norvegicus OX=10116 GN=Usp46 PE=1 SV=2
TRINITY_DN2915_c0_g1_i72	1	UBP44	MOUSEUbiquitin carboxyl-terminal hydrolase 44 OS=Mus musculus OX=10090 GN=Usp44 PE=2 SV=3
TRINITY_DN3789_c0_g1_i7	1	UBP42	MOUSEUbiquitin carboxyl-terminal hydrolase 42 OS=Mus musculus OX=10090 GN=Usp42 PE=1 SV=1
TRINITY_DN23809_c0_g1_i3	1	UBP40	MOUSEUbiquitin carboxyl-terminal hydrolase 40 OS=Mus musculus OX=10090 GN=Usp40 PE=1 SV=2
TRINITY_DN53561_c0_g1_i4	1	UBP40	HUMANUbiquitin carboxyl-terminal hydrolase 40 OS=Homo sapiens OX=9606 GN=USP40 PE=1 SV=3
TRINITY_DN22144_c0_g1_i2	1	UBP4	RATUbiquitin carboxyl-terminal hydrolase 4 OS=Rattus norvegicus OX=10116 GN=Usp4 PE=1 SV=1
TRINITY_DN3649_c0_g1_i3	1	UBP37	CHICKUbiquitin carboxyl-terminal hydrolase 37 OS=Gallus gallus OX=9031 GN=USP37 PE=3 SV=1
TRINITY_DN2283_c0_g1_i11	1	UBP24	MOUSEUbiquitin carboxyl-terminal hydrolase 24 OS=Mus musculus OX=10090 GN=Usp24 PE=1 SV=1
TRINITY_DN2283_c0_g1_i10	1	UBP24	MOUSEUbiquitin carboxyl-terminal hydrolase 24 OS=Mus musculus OX=10090 GN=Usp24 PE=1 SV=1
TRINITY_DN14971_c0_g1_i13	1	UBP22	DANREUbiquitin carboxyl-terminal hydrolase 22 OS=Danio rerio OX=7955 GN=usp22 PE=2 SV=1
TRINITY_DN2884_c0_g1_i94	1	UBP2	HUMANUbiquitin carboxyl-terminal hydrolase 2 OS=Homo sapiens OX=9606 GN=USP2 PE=1 SV=2
TRINITY_DN6384_c1_g1_i11	1	UBP19	HUMANUbiquitin carboxyl-terminal hydrolase 19 OS=Homo sapiens OX=9606 GN=USP19 PE=1 SV=2
TRINITY_DN19452_c2_g1_i2	1	UBP15	XENTRUbiquitin carboxyl-terminal hydrolase 15 OS=Xenopus tropicalis OX=8364 GN=usp15 PE=2 SV=2
TRINITY_DN5141_c0_g1_i10	1	UBP15	RATUbiquitin carboxyl-terminal hydrolase 15 OS=Rattus norvegicus OX=10116 GN=Usp15 PE=1 SV=1
TRINITY_DN25498_c0_g1_i18	1	UBP15	RATUbiquitin carboxyl-terminal hydrolase 15 OS=Rattus norvegicus OX=10116 GN=Usp15 PE=1 SV=1
TRINITY_DN5141_c0_g1_i7	1	UBP15	RATUbiquitin carboxyl-terminal hydrolase 15 OS=Rattus norvegicus OX=10116 GN=Usp15 PE=1 SV=1
TRINITY_DN739_c0_g1_i6	1	UBP15	RATUbiquitin carboxyl-terminal hydrolase 15 OS=Rattus norvegicus OX=10116 GN=Usp15 PE=1 SV=1
TRINITY_DN9489_c0_g1_i23	1	UBP15	RATUbiquitin carboxyl-terminal hydrolase 15 OS=Rattus norvegicus OX=10116 GN=Usp15 PE=1 SV=1
TRINITY_DN7717_c0_g1_i3	1	UBP15	RATUbiquitin carboxyl-terminal hydrolase 15 OS=Rattus norvegicus OX=10116 GN=Usp15 PE=1 SV=1
TRINITY_DN9383_c0_g1_i2	1	UBP14	ARATHUbiquitin carboxyl-terminal hydrolase 14 OS=Arabidopsis thaliana OX=3702 GN=UBP14 PE=1 SV=1
TRINITY_DN5013_c0_g1_i3	1	UBP13	ARATHUbiquitin carboxyl-terminal hydrolase 13 OS=Arabidopsis thaliana OX=3702 GN=UBP13 PE=1 SV=1
TRINITY_DN5013_c0_g1_i4	1	UBP12	ARATHUbiquitin carboxyl-terminal hydrolase 12 OS=Arabidopsis thaliana OX=3702 GN=UBP12 PE=1 SV=2
TRINITY_DN35612_c0_g1_i3	1	UBP1	MOUSEUbiquitin carboxyl-terminal hydrolase 1 OS=Mus musculus OX=10090 GN=Usp1 PE=1 SV=1
TRINITY_DN11307_c0_g1_i25	1	UBL7	BOVINUbiquitin-like protein 7 OS=Bos taurus OX=9913 GN=UBL7 PE=2 SV=1
TRINITY_DN459_c0_g2_i5	1	UBL5	BOVINUbiquitin-like protein 5 OS=Bos taurus OX=9913 GN=UBL5 PE=3 SV=1
TRINITY_DN1372_c0_g1_i5	1	UBIQP	XENLAPolyubiquitin (Fragment) OS=Xenopus laevis OX=8355 PE=1 SV=2
TRINITY_DN18047_c1_g1_i4	1	UBIQP	XENLAPolyubiquitin (Fragment) OS=Xenopus laevis OX=8355 PE=1 SV=2
TRINITY_DN31453_c0_g1_i1	1	UBIQP	XENLAPolyubiquitin (Fragment) OS=Xenopus laevis OX=8355 PE=1 SV=2
TRINITY_DN24884_c0_g1_i1	1	UBIQP	XENLAPolyubiquitin (Fragment) OS=Xenopus laevis OX=8355 PE=1 SV=2
TRINITY_DN18047_c1_g1_i3	1	UBIQP	XENLAPolyubiquitin (Fragment) OS=Xenopus laevis OX=8355 PE=1 SV=2
TRINITY_DN516_c1_g1_i1	1	UBIQP	XENLAPolyubiquitin (Fragment) OS=Xenopus laevis OX=8355 PE=1 SV=2
TRINITY_DN26032_c0_g1_i9	1	UBIQP	XENLAPolyubiquitin (Fragment) OS=Xenopus laevis OX=8355 PE=1 SV=2
TRINITY_DN1372_c3_g1_i12	1	UBIQP	XENLAPolyubiquitin (Fragment) OS=Xenopus laevis OX=8355 PE=1 SV=2
TRINITY_DN40092_c0_g1_i4	1	UBIQP	XENLAPolyubiquitin (Fragment) OS=Xenopus laevis OX=8355 PE=1 SV=2
TRINITY_DN33904_c0_g1_i2	1	UBIQP	TETPYPolyubiquitin OS=Tetrahymena pyriformis OX=5908 GN=TU20 PE=3 SV=1
TRINITY_DN52712_c1_g1_i1	1	UBIQP	STRPUPolyubiquitin (Fragment) OS=Strongylocentrotus purpuratus OX=7668 PE=2 SV=2
TRINITY_DN26032_c0_g1_i8	1	UBIQP	STRPUPolyubiquitin (Fragment) OS=Strongylocentrotus purpuratus OX=7668 PE=2 SV=2
TRINITY_DN23980_c0_g1_i2	1	UBIQP	GEOCYPolyubiquitin OS=Geodia cydonium OX=6047 PE=2 SV=2
TRINITY_DN23980_c0_g1_i7	1	UBIQP	GEOCYPolyubiquitin OS=Geodia cydonium OX=6047 PE=2 SV=2
TRINITY_DN33904_c0_g1_i1	1	UBIQP	GEOCYPolyubiquitin OS=Geodia cydonium OX=6047 PE=2 SV=2
TRINITY_DN17089_c0_g1_i27	1	UBIQA	DICDIPolyubiquitin-A OS=Dictyostelium discoideum OX=44689 GN=ubqA PE=1 SV=1
TRINITY_DN18801_c3_g1_i1	1	UBIQ	AVESAUbiquitin OS=Avena sativa OX=4498 PE=1 SV=1
TRINITY_DN32846_c0_g1_i1	1	UBIL	NPVOPUbiquitin-like protein OS=Orgyia pseudotsugata multicapsid polyhedrosis virus OX=262177 GN=V-UBI PE=3 SV=1
TRINITY_DN121939_c0_g1_i1	1	UBIL	NPVACviral Ubiquitin OS=Autographa californica nuclear polyhedrosis virus OX=46015 GN=vUbi PE=1 SV=2
TRINITY_DN32670_c0_g1_i2	1	UBI4P	CANAXPolyubiquitin OS=Candida albicans OX=5476 GN=UBI4 PE=1 SV=1
TRINITY_DN1048_c0_g1_i1	1	UBFD1	HUMANUbiquitin domain-containing protein UBFD1 OS=Homo sapiens OX=9606 GN=UBFD1 PE=1 SV=2
TRINITY_DN1048_c0_g1_i19	1	UBFD1	HUMANUbiquitin domain-containing protein UBFD1 OS=Homo sapiens OX=9606 GN=UBFD1 PE=1 SV=2
TRINITY_DN1676_c0_g1_i40	1	UBE4B	MOUSEUbiquitin conjugation factor E4 B OS=Mus musculus OX=10090 GN=Ube4b PE=1 SV=3
TRINITY_DN3505_c0_g1_i1	1	UBE3C	HUMANUbiquitin-protein ligase E3C OS=Homo sapiens OX=9606 GN=UBE3C PE=1 SV=3
TRINITY_DN2669_c0_g1_i227	1	UBE3B	XENTRUbiquitin-protein ligase E3B OS=Xenopus tropicalis OX=8364 GN=ube3b PE=2 SV=1
TRINITY_DN2669_c0_g1_i168	1	UBE3B	XENTRUbiquitin-protein ligase E3B OS=Xenopus tropicalis OX=8364 GN=ube3b PE=2 SV=1
TRINITY_DN2669_c0_g1_i223	1	UBE3B	MOUSEUbiquitin-protein ligase E3B OS=Mus musculus OX=10090 GN=Ube3b PE=1 SV=3
TRINITY_DN4058_c1_g1_i100	1	UBE3A	MOUSEUbiquitin-protein ligase E3A OS=Mus musculus OX=10090 GN=Ube3a PE=1 SV=2
TRINITY_DN4058_c1_g1_i31	1	UBE3A	HUMANUbiquitin-protein ligase E3A OS=Homo sapiens OX=9606 GN=UBE3A PE=1 SV=4
TRINITY_DN31551_c0_g1_i6	1	UBE2W	XENTRUbiquitin-conjugating enzyme E2 W OS=Xenopus tropicalis OX=8364 GN=ube2w PE=2 SV=1
TRINITY_DN3836_c0_g1_i16	1	UBE2U	MACFAUbiquitin-conjugating enzyme E2 U OS=Macaca fascicularis OX=9541 GN=UBE2U PE=2 SV=1
TRINITY_DN488_c0_g1_i11	1	UBE2S	NEMVEUbiquitin-conjugating enzyme E2 S OS=Nematostella vectensis OX=45351 GN=v1g237158 PE=3 SV=1
TRINITY_DN2690_c0_g1_i60	1	UBE2H	BOVINUbiquitin-conjugating enzyme E2 H OS=Bos taurus OX=9913 GN=UBE2H PE=2 SV=1
TRINITY_DN8337_c0_g1_i14	1	UBE2A	HUMANUbiquitin-conjugating enzyme E2 A OS=Homo sapiens OX=9606 GN=UBE2A PE=1 SV=2
TRINITY_DN155_c0_g1_i62	1	UBC9	CHICKSUMO-conjugating enzyme UBC9 OS=Gallus gallus OX=9031 GN=UBE2I PE=1 SV=1
TRINITY_DN155_c0_g1_i13	1	UBC9	CHICKSUMO-conjugating enzyme UBC9 OS=Gallus gallus OX=9031 GN=UBE2I PE=1 SV=1
TRINITY_DN3358_c0_g1_i1	1	UBC12	BOVINNEDD8-conjugating enzyme Ubc12 OS=Bos taurus OX=9913 GN=UBE2M PE=2 SV=1
TRINITY_DN16897_c0_g1_i1	1	UBC	PIGPolyubiquitin-C OS=Sus scrofa OX=9823 GN=UBC PE=2 SV=1
TRINITY_DN16897_c1_g1_i3	1	UBC	PIGPolyubiquitin-C OS=Sus scrofa OX=9823 GN=UBC PE=2 SV=1
TRINITY_DN35779_c1_g1_i3	1	UBC	HUMANPolyubiquitin-C OS=Homo sapiens OX=9606 GN=UBC PE=1 SV=3
TRINITY_DN3412_c0_g1_i21	1	UBC	GORGOPolyubiquitin-C OS=Gorilla gorilla gorilla OX=9595 GN=UBC PE=3 SV=1
TRINITY_DN3412_c0_g1_i25	1	UBC	GORGOPolyubiquitin-C OS=Gorilla gorilla gorilla OX=9595 GN=UBC PE=3 SV=1
TRINITY_DN3412_c0_g1_i27	1	UBC	GORGOPolyubiquitin-C OS=Gorilla gorilla gorilla OX=9595 GN=UBC PE=3 SV=1
TRINITY_DN9819_c0_g1_i2	1	UBC	BOVINPolyubiquitin-C OS=Bos taurus OX=9913 GN=UBC PE=1 SV=1
TRINITY_DN16897_c0_g1_i10	1	UBB	SHEEPPolyubiquitin-B OS=Ovis aries OX=9940 GN=UBB PE=2 SV=1
TRINITY_DN16897_c0_g1_i3	1	UBB	SHEEPPolyubiquitin-B OS=Ovis aries OX=9940 GN=UBB PE=2 SV=1
TRINITY_DN1372_c3_g1_i10	1	UBB	GORGOPolyubiquitin-B OS=Gorilla gorilla gorilla OX=9595 GN=UBB PE=3 SV=1
TRINITY_DN1372_c3_g1_i3	1	UBB	GORGOPolyubiquitin-B OS=Gorilla gorilla gorilla OX=9595 GN=UBB PE=3 SV=1
TRINITY_DN3016_c0_g1_i14	1	UBA3	RATNEDD8-activating enzyme E1 catalytic subunit OS=Rattus norvegicus OX=10116 GN=Uba3 PE=1 SV=1
TRINITY_DN467_c0_g1_i28	1	UBA1	RABITUbiquitin-like modifier-activating enzyme 1 OS=Oryctolagus cuniculus OX=9986 GN=UBA1 PE=1 SV=1
TRINITY_DN467_c0_g1_i19	1	UBA1	RABITUbiquitin-like modifier-activating enzyme 1 OS=Oryctolagus cuniculus OX=9986 GN=UBA1 PE=1 SV=1
TRINITY_DN467_c0_g1_i23	1	UBA1	RABITUbiquitin-like modifier-activating enzyme 1 OS=Oryctolagus cuniculus OX=9986 GN=UBA1 PE=1 SV=1
TRINITY_DN16958_c0_g1_i2	1	UBA1	MOUSEUbiquitin-like modifier-activating enzyme 1 OS=Mus musculus OX=10090 GN=Uba1 PE=1 SV=1
TRINITY_DN461_c0_g1_i1	1	UB2V1	BOVINUbiquitin-conjugating enzyme E2 variant 1 OS=Bos taurus OX=9913 GN=UBE2V1 PE=2 SV=1
TRINITY_DN844_c0_g1_i2	1	UB2Q2	RABITUbiquitin-conjugating enzyme E2 Q2 OS=Oryctolagus cuniculus OX=9986 GN=UBE2Q2 PE=2 SV=1
TRINITY_DN844_c0_g1_i1	1	UB2Q2	RABITUbiquitin-conjugating enzyme E2 Q2 OS=Oryctolagus cuniculus OX=9986 GN=UBE2Q2 PE=2 SV=1
TRINITY_DN844_c0_g1_i10	1	UB2Q2	BOVINUbiquitin-conjugating enzyme E2 Q2 OS=Bos taurus OX=9913 GN=UBE2Q2 PE=2 SV=1
TRINITY_DN7619_c0_g1_i18	1	UB2J2	HUMANUbiquitin-conjugating enzyme E2 J2 OS=Homo sapiens OX=9606 GN=UBE2J2 PE=1 SV=3
TRINITY_DN8337_c0_g1_i16	1	UB2J2	BOVINUbiquitin-conjugating enzyme E2 J2 OS=Bos taurus OX=9913 GN=UBE2J2 PE=2 SV=1
TRINITY_DN3829_c0_g1_i10	1	UB2J1	HUMANUbiquitin-conjugating enzyme E2 J1 OS=Homo sapiens OX=9606 GN=UBE2J1 PE=1 SV=2
TRINITY_DN3829_c0_g1_i15	1	UB2J1	HUMANUbiquitin-conjugating enzyme E2 J1 OS=Homo sapiens OX=9606 GN=UBE2J1 PE=1 SV=2
TRINITY_DN1232_c0_g1_i1	1	UB2G2	HUMANUbiquitin-conjugating enzyme E2 G2 OS=Homo sapiens OX=9606 GN=UBE2G2 PE=1 SV=1
TRINITY_DN1232_c0_g1_i4	1	UB2G2	HUMANUbiquitin-conjugating enzyme E2 G2 OS=Homo sapiens OX=9606 GN=UBE2G2 PE=1 SV=1
TRINITY_DN14971_c0_g1_i1	1	UB22A	XENLAUbiquitin carboxyl-terminal hydrolase 22-A OS=Xenopus laevis OX=8355 GN=usp22-a PE=2 SV=1
TRINITY_DN1994_c1_g1_i1	1	UAP1L	DANREUDP-N-acetylhexosamine pyrophosphorylase-like protein 1 OS=Danio rerio OX=7955 GN=uap1l1 PE=2 SV=1
TRINITY_DN1994_c1_g1_i8	1	UAP1L	DANREUDP-N-acetylhexosamine pyrophosphorylase-like protein 1 OS=Danio rerio OX=7955 GN=uap1l1 PE=2 SV=1
TRINITY_DN1994_c1_g1_i7	1	UAP1L	DANREUDP-N-acetylhexosamine pyrophosphorylase-like protein 1 OS=Danio rerio OX=7955 GN=uap1l1 PE=2 SV=1
TRINITY_DN1994_c1_g1_i6	1	UAP1	MOUSEUDP-N-acetylhexosamine pyrophosphorylase OS=Mus musculus OX=10090 GN=Uap1 PE=1 SV=1
TRINITY_DN11494_c2_g1_i4	1	U5S1	MOUSE116 kDa U5 small nuclear ribonucleoprotein component OS=Mus musculus OX=10090 GN=Eftud2 PE=1 SV=1
TRINITY_DN7209_c1_g1_i1	1	U5S1	MOUSE116 kDa U5 small nuclear ribonucleoprotein component OS=Mus musculus OX=10090 GN=Eftud2 PE=1 SV=1
TRINITY_DN330_c0_g1_i5	1	U5S1	HUMAN116 kDa U5 small nuclear ribonucleoprotein component OS=Homo sapiens OX=9606 GN=EFTUD2 PE=1 SV=1
TRINITY_DN330_c0_g1_i3	1	U5S1	HUMAN116 kDa U5 small nuclear ribonucleoprotein component OS=Homo sapiens OX=9606 GN=EFTUD2 PE=1 SV=1
TRINITY_DN22895_c0_g1_i5	1	U5S1	CHICK116 kDa U5 small nuclear ribonucleoprotein component OS=Gallus gallus OX=9031 GN=EFTUD2 PE=2 SV=1
TRINITY_DN10839_c0_g1_i6	1	U5S1	CHICK116 kDa U5 small nuclear ribonucleoprotein component OS=Gallus gallus OX=9031 GN=EFTUD2 PE=2 SV=1
TRINITY_DN6184_c0_g1_i2	1	U5S1	CHICK116 kDa U5 small nuclear ribonucleoprotein component OS=Gallus gallus OX=9031 GN=EFTUD2 PE=2 SV=1
TRINITY_DN9625_c0_g1_i14	1	U5S1	CHICK116 kDa U5 small nuclear ribonucleoprotein component OS=Gallus gallus OX=9031 GN=EFTUD2 PE=2 SV=1
TRINITY_DN134340_c0_g1_i1	1	U520	HUMANU5 small nuclear ribonucleoprotein 200 kDa helicase OS=Homo sapiens OX=9606 GN=SNRNP200 PE=1 SV=2
TRINITY_DN19132_c0_g1_i1	1	U520	HUMANU5 small nuclear ribonucleoprotein 200 kDa helicase OS=Homo sapiens OX=9606 GN=SNRNP200 PE=1 SV=2
TRINITY_DN8039_c0_g1_i4	1	U428	DROMEUPF0428 protein CG16865 OS=Drosophila melanogaster OX=7227 GN=CG16865 PE=1 SV=1
TRINITY_DN8039_c0_g1_i6	1	U428	DROMEUPF0428 protein CG16865 OS=Drosophila melanogaster OX=7227 GN=CG16865 PE=1 SV=1
TRINITY_DN43212_c0_g1_i42	1	U2QL1	MOUSEUbiquitin-conjugating enzyme E2Q-like protein 1 OS=Mus musculus OX=10090 GN=Ube2ql1 PE=2 SV=2
TRINITY_DN6549_c0_g1_i6	1	U2AF2	HUMANSplicing factor U2AF 65 kDa subunit OS=Homo sapiens OX=9606 GN=U2AF2 PE=1 SV=4
TRINITY_DN4228_c0_g1_i3	1	U2AF1	BOVINSplicing factor U2AF 35 kDa subunit OS=Bos taurus OX=9913 GN=U2AF1 PE=2 SV=1
TRINITY_DN4228_c0_g1_i2	1	U2AF1	BOVINSplicing factor U2AF 35 kDa subunit OS=Bos taurus OX=9913 GN=U2AF1 PE=2 SV=1
TRINITY_DN666_c0_g1_i5	1	U1SBP	BOVINU11/U12 small nuclear ribonucleoprotein 35 kDa protein OS=Bos taurus OX=9913 GN=SNRNP35 PE=2 SV=1
TRINITY_DN666_c0_g1_i7	1	U1SBP	BOVINU11/U12 small nuclear ribonucleoprotein 35 kDa protein OS=Bos taurus OX=9913 GN=SNRNP35 PE=2 SV=1
TRINITY_DN666_c0_g1_i6	1	U1SBP	BOVINU11/U12 small nuclear ribonucleoprotein 35 kDa protein OS=Bos taurus OX=9913 GN=SNRNP35 PE=2 SV=1
TRINITY_DN11566_c0_g1_i4	1	U183	DROMEUPF0183 protein CG7083 OS=Drosophila melanogaster OX=7227 GN=CG7083 PE=2 SV=1
TRINITY_DN11566_c0_g1_i18	1	U183	DROMEUPF0183 protein CG7083 OS=Drosophila melanogaster OX=7227 GN=CG7083 PE=2 SV=1
TRINITY_DN16941_c0_g1_i2	1	U17PA	MOUSEUbiquitin carboxyl-terminal hydrolase 17-like protein A OS=Mus musculus OX=10090 GN=Usp17la PE=1 SV=1
TRINITY_DN7783_c0_g1_i1	1	U119A	BOVINProtein unc-119 homolog A OS=Bos taurus OX=9913 GN=UNC119 PE=2 SV=1
TRINITY_DN6297_c0_g2_i10	1	TYY1	HUMANTranscriptional repressor protein YY1 OS=Homo sapiens OX=9606 GN=YY1 PE=1 SV=2
TRINITY_DN31021_c0_g1_i9	1	TYW4	GIBZEtRNA wybutosine-synthesizing protein 4 OS=Gibberella zeae (strain PH-1 / ATCC MYA-4620 / FGSC 9075 / NRRL 31084) OX=229533 GN=PPM2 PE=3 SV=1
TRINITY_DN2035_c0_g1_i22	1	TYW1	XENLAS-adenosyl-L-methionine-dependent tRNA 4-demethylwyosine synthase TYW1 OS=Xenopus laevis OX=8355 GN=tyw1 PE=2 SV=1
TRINITY_DN2035_c0_g1_i24	1	TYW1	XENLAS-adenosyl-L-methionine-dependent tRNA 4-demethylwyosine synthase TYW1 OS=Xenopus laevis OX=8355 GN=tyw1 PE=2 SV=1
TRINITY_DN12678_c0_g1_i1	1	TYW1	MOUSES-adenosyl-L-methionine-dependent tRNA 4-demethylwyosine synthase TYW1 OS=Mus musculus OX=10090 GN=Tyw1 PE=1 SV=1
TRINITY_DN357_c0_g1_i38	1	TYW1	DANRES-adenosyl-L-methionine-dependent tRNA 4-demethylwyosine synthase TYW1 OS=Danio rerio OX=7955 GN=tyw1 PE=2 SV=1
TRINITY_DN357_c0_g1_i62	1	TYW1	DANRES-adenosyl-L-methionine-dependent tRNA 4-demethylwyosine synthase TYW1 OS=Danio rerio OX=7955 GN=tyw1 PE=2 SV=1
TRINITY_DN357_c0_g1_i54	1	TYW1	DANRES-adenosyl-L-methionine-dependent tRNA 4-demethylwyosine synthase TYW1 OS=Danio rerio OX=7955 GN=tyw1 PE=2 SV=1
TRINITY_DN357_c0_g1_i17	1	TYW1	DANRES-adenosyl-L-methionine-dependent tRNA 4-demethylwyosine synthase TYW1 OS=Danio rerio OX=7955 GN=tyw1 PE=2 SV=1
TRINITY_DN36111_c0_g1_i1	1	TYRP2	HUMANL-dopachrome tautomerase OS=Homo sapiens OX=9606 GN=DCT PE=1 SV=1
TRINITY_DN21147_c0_g1_i25	1	TYRO	STRGATyrosinase OS=Streptomyces glaucescens OX=1907 GN=melC2 PE=1 SV=3
TRINITY_DN407_c0_g1_i16	1	TYRO	PELNITyrosinase OS=Pelophylax nigromaculatus OX=8409 GN=TYR PE=2 SV=1
TRINITY_DN14417_c1_g1_i9	1	TYRO	PELESTyrosinase OS=Pelophylax esculentus OX=8401 GN=Tyr PE=1 SV=1
TRINITY_DN14417_c1_g1_i3	1	TYRO	PELESTyrosinase OS=Pelophylax esculentus OX=8401 GN=Tyr PE=1 SV=1
TRINITY_DN49789_c0_g1_i2	1	TYPA	SYNY3GTP-binding protein TypA/BipA homolog OS=Synechocystis sp. (strain PCC 6803 / Kazusa) OX=1111708 GN=typA PE=3 SV=1
TRINITY_DN86628_c0_g1_i1	1	TYPA	SYNY3GTP-binding protein TypA/BipA homolog OS=Synechocystis sp. (strain PCC 6803 / Kazusa) OX=1111708 GN=typA PE=3 SV=1
TRINITY_DN118741_c0_g1_i1	1	TYPA	HELPJGTP-binding protein TypA/BipA homolog OS=Helicobacter pylori (strain J99 / ATCC 700824) OX=85963 GN=typA PE=3 SV=1
TRINITY_DN92829_c0_g1_i1	1	TYPA	HAEINGTP-binding protein TypA/BipA homolog OS=Haemophilus influenzae (strain ATCC 51907 / DSM 11121 / KW20 / Rd) OX=71421 GN=typA PE=1 SV=1
TRINITY_DN80408_c0_g1_i1	1	TYPA	BACSUGTP-binding protein TypA/BipA homolog OS=Bacillus subtilis (strain 168) OX=224308 GN=typA PE=3 SV=1
TRINITY_DN9490_c0_g1_i1	1	TYDP2	XENLATyrosyl-DNA phosphodiesterase 2 OS=Xenopus laevis OX=8355 GN=tdp2 PE=2 SV=1
TRINITY_DN1813_c0_g2_i28	1	TYDP1	MOUSETyrosyl-DNA phosphodiesterase 1 OS=Mus musculus OX=10090 GN=Tdp1 PE=1 SV=2
TRINITY_DN1971_c0_g1_i4	1	TYDP1	MOUSETyrosyl-DNA phosphodiesterase 1 OS=Mus musculus OX=10090 GN=Tdp1 PE=1 SV=2
TRINITY_DN1813_c0_g2_i17	1	TYDP1	MOUSETyrosyl-DNA phosphodiesterase 1 OS=Mus musculus OX=10090 GN=Tdp1 PE=1 SV=2
TRINITY_DN73_c4_g1_i1	1	TYDP1	MOUSETyrosyl-DNA phosphodiesterase 1 OS=Mus musculus OX=10090 GN=Tdp1 PE=1 SV=2
TRINITY_DN1971_c0_g1_i1	1	TYDP1	HUMANTyrosyl-DNA phosphodiesterase 1 OS=Homo sapiens OX=9606 GN=TDP1 PE=1 SV=2
TRINITY_DN1971_c0_g1_i5	1	TYDP1	HUMANTyrosyl-DNA phosphodiesterase 1 OS=Homo sapiens OX=9606 GN=TDP1 PE=1 SV=2
TRINITY_DN73_c4_g1_i3	1	TYDP1	HUMANTyrosyl-DNA phosphodiesterase 1 OS=Homo sapiens OX=9606 GN=TDP1 PE=1 SV=2
TRINITY_DN1971_c0_g1_i10	1	TYDP1	HUMANTyrosyl-DNA phosphodiesterase 1 OS=Homo sapiens OX=9606 GN=TDP1 PE=1 SV=2
TRINITY_DN1971_c0_g1_i7	1	TYDP1	CAEELProbable tyrosyl-DNA phosphodiesterase OS=Caenorhabditis elegans OX=6239 GN=F52C12.1 PE=3 SV=1
TRINITY_DN105_c1_g1_i16	1	TXNL1	HUMANThioredoxin-like protein 1 OS=Homo sapiens OX=9606 GN=TXNL1 PE=1 SV=3
TRINITY_DN1604_c0_g1_i9	1	TXND5	DROMEThioredoxin domain-containing protein 5 homolog OS=Drosophila melanogaster OX=7227 GN=prtp PE=1 SV=2
TRINITY_DN6694_c0_g1_i2	1	TXND3	HELCRThioredoxin domain-containing protein 3 homolog OS=Heliocidaris crassispina OX=1043166 GN=NME8 PE=1 SV=1
TRINITY_DN1337_c1_g1_i85	1	TXLNB	HUMANBeta-taxilin OS=Homo sapiens OX=9606 GN=TXLNB PE=1 SV=3
TRINITY_DN3757_c0_g1_i5	1	TXIP1	MOUSETranslin-associated factor X-interacting protein 1 OS=Mus musculus OX=10090 GN=Tsnaxip1 PE=1 SV=2
TRINITY_DN3376_c0_g1_i10	1	TWF2	HUMANTwinfilin-2 OS=Homo sapiens OX=9606 GN=TWF2 PE=1 SV=2
TRINITY_DN3376_c0_g1_i32	1	TWF2	DANRETwinfilin-2 OS=Danio rerio OX=7955 GN=twf2 PE=2 SV=1
TRINITY_DN3376_c0_g1_i16	1	TWF2	DANRETwinfilin-2 OS=Danio rerio OX=7955 GN=twf2 PE=2 SV=1
TRINITY_DN3376_c0_g1_i23	1	TWF1	RATTwinfilin-1 OS=Rattus norvegicus OX=10116 GN=Twf1 PE=1 SV=1
TRINITY_DN1100_c1_g1_i29	1	TULP4	HUMANTubby-related protein 4 OS=Homo sapiens OX=9606 GN=TULP4 PE=1 SV=2
TRINITY_DN3849_c2_g1_i1	1	TULP3	MOUSETubby-related protein 3 OS=Mus musculus OX=10090 GN=Tulp3 PE=1 SV=1
TRINITY_DN96476_c0_g1_i1	1	TUBE2	BPT7Tail tubular protein gp12 OS=Enterobacteria phage T7 OX=10760 GN=12 PE=1 SV=1
TRINITY_DN8574_c0_g1_i2	1	TTLL6	DANRETubulin polyglutamylase ttll6 OS=Danio rerio OX=7955 GN=ttll6 PE=2 SV=1
TRINITY_DN4440_c1_g1_i11	1	TTLL3	DANRETubulin monoglycylase TTLL3 OS=Danio rerio OX=7955 GN=ttll3 PE=2 SV=1
TRINITY_DN4440_c1_g1_i6	1	TTLL3	DANRETubulin monoglycylase TTLL3 OS=Danio rerio OX=7955 GN=ttll3 PE=2 SV=1
TRINITY_DN461_c1_g1_i214	1	TTLL1	BOVINProbable tubulin polyglutamylase TTLL1 OS=Bos taurus OX=9913 GN=TTLL1 PE=2 SV=1
TRINITY_DN461_c1_g1_i102	1	TTLL1	BOVINProbable tubulin polyglutamylase TTLL1 OS=Bos taurus OX=9913 GN=TTLL1 PE=2 SV=1
TRINITY_DN461_c1_g1_i110	1	TTLL1	BOVINProbable tubulin polyglutamylase TTLL1 OS=Bos taurus OX=9913 GN=TTLL1 PE=2 SV=1
TRINITY_DN8609_c0_g1_i8	1	TTL3A	DROMETubulin glycylase 3A OS=Drosophila melanogaster OX=7227 GN=TTLL3A PE=1 SV=1
TRINITY_DN17564_c0_g1_i12	1	TTL12	MOUSETubulin--tyrosine ligase-like protein 12 OS=Mus musculus OX=10090 GN=Ttll12 PE=1 SV=1
TRINITY_DN17564_c0_g1_i3	1	TTL12	MOUSETubulin--tyrosine ligase-like protein 12 OS=Mus musculus OX=10090 GN=Ttll12 PE=1 SV=1
TRINITY_DN7780_c0_g1_i6	1	TTI2	MOUSETELO2-interacting protein 2 OS=Mus musculus OX=10090 GN=Tti2 PE=2 SV=1
TRINITY_DN21216_c0_g1_i1	1	TTF2	MOUSETranscription termination factor 2 OS=Mus musculus OX=10090 GN=Ttf2 PE=1 SV=2
TRINITY_DN2783_c2_g1_i176	1	TTC9C	RATTetratricopeptide repeat protein 9C OS=Rattus norvegicus OX=10116 GN=Ttc9c PE=2 SV=1
TRINITY_DN29675_c0_g1_i26	1	TTC7B	MOUSETetratricopeptide repeat protein 7B OS=Mus musculus OX=10090 GN=Ttc7b PE=1 SV=1
TRINITY_DN10657_c0_g1_i13	1	TTC6	HUMANTetratricopeptide repeat protein 6 OS=Homo sapiens OX=9606 GN=TTC6 PE=2 SV=1
TRINITY_DN10657_c0_g1_i14	1	TTC6	HUMANTetratricopeptide repeat protein 6 OS=Homo sapiens OX=9606 GN=TTC6 PE=2 SV=1
TRINITY_DN10657_c0_g1_i19	1	TTC6	HUMANTetratricopeptide repeat protein 6 OS=Homo sapiens OX=9606 GN=TTC6 PE=2 SV=1
TRINITY_DN6746_c0_g1_i24	1	TTC5	RATTetratricopeptide repeat protein 5 OS=Rattus norvegicus OX=10116 GN=Ttc5 PE=2 SV=1
TRINITY_DN56773_c0_g1_i1	1	TTC38	XENTRTetratricopeptide repeat protein 38 OS=Xenopus tropicalis OX=8364 GN=ttc38 PE=2 SV=1
TRINITY_DN933_c0_g1_i23	1	TTC37	XENLATetratricopeptide repeat protein 37 OS=Xenopus laevis OX=8355 GN=ttc37 PE=2 SV=1
TRINITY_DN933_c0_g1_i15	1	TTC37	XENLATetratricopeptide repeat protein 37 OS=Xenopus laevis OX=8355 GN=ttc37 PE=2 SV=1
TRINITY_DN1268_c1_g2_i17	1	TTC36	MOUSETetratricopeptide repeat protein 36 OS=Mus musculus OX=10090 GN=Ttc36 PE=1 SV=1
TRINITY_DN5276_c0_g1_i6	1	TTC27	BOVINTetratricopeptide repeat protein 27 OS=Bos taurus OX=9913 GN=TTC27 PE=2 SV=1
TRINITY_DN4374_c0_g1_i1	1	TTC16	HUMANTetratricopeptide repeat protein 16 OS=Homo sapiens OX=9606 GN=TTC16 PE=2 SV=2
TRINITY_DN105_c2_g1_i12	1	TTC13	HUMANTetratricopeptide repeat protein 13 OS=Homo sapiens OX=9606 GN=TTC13 PE=2 SV=3
TRINITY_DN8318_c0_g1_i12	1	TTC1	HUMANTetratricopeptide repeat protein 1 OS=Homo sapiens OX=9606 GN=TTC1 PE=1 SV=1
TRINITY_DN14473_c0_g1_i17	1	TTBK2	MOUSETau-tubulin kinase 2 OS=Mus musculus OX=10090 GN=Ttbk2 PE=1 SV=1
TRINITY_DN2348_c0_g1_i2	1	TT39A	MOUSETetratricopeptide repeat protein 39A OS=Mus musculus OX=10090 GN=Ttc39a PE=2 SV=1
TRINITY_DN17937_c0_g1_i29	1	TT30A	XENTRTetratricopeptide repeat protein 30A OS=Xenopus tropicalis OX=8364 GN=ttc30a PE=2 SV=1
TRINITY_DN17937_c0_g1_i13	1	TT30A	XENLATetratricopeptide repeat protein 30A OS=Xenopus laevis OX=8355 GN=ttc30a PE=2 SV=1
TRINITY_DN17937_c0_g1_i17	1	TT30A	XENLATetratricopeptide repeat protein 30A OS=Xenopus laevis OX=8355 GN=ttc30a PE=2 SV=1
TRINITY_DN6486_c0_g1_i6	1	TT21B	HUMANTetratricopeptide repeat protein 21B OS=Homo sapiens OX=9606 GN=TTC21B PE=1 SV=2
TRINITY_DN24888_c0_g1_i8	1	TSUA	DICDIProbable serine/threonine-protein kinase tsuA OS=Dictyostelium discoideum OX=44689 GN=tsuA PE=1 SV=1
TRINITY_DN15920_c0_g1_i2	1	TSTD3	MOUSEThiosulfate sulfurtransferase/rhodanese-like domain-containing protein 3 OS=Mus musculus OX=10090 GN=Tstd3 PE=1 SV=1
TRINITY_DN10674_c0_g2_i1	1	TSSK2	MOUSETestis-specific serine/threonine-protein kinase 2 OS=Mus musculus OX=10090 GN=Tssk2 PE=1 SV=2
TRINITY_DN11852_c0_g1_i9	1	TSR2	DANREPre-rRNA-processing protein TSR2 homolog OS=Danio rerio OX=7955 GN=tsr2 PE=2 SV=1
TRINITY_DN11852_c0_g1_i3	1	TSR2	DANREPre-rRNA-processing protein TSR2 homolog OS=Danio rerio OX=7955 GN=tsr2 PE=2 SV=1
TRINITY_DN458_c0_g1_i16	1	TSR1	MOUSEPre-rRNA-processing protein TSR1 homolog OS=Mus musculus OX=10090 GN=Tsr1 PE=1 SV=1
TRINITY_DN458_c0_g1_i12	1	TSR1	MOUSEPre-rRNA-processing protein TSR1 homolog OS=Mus musculus OX=10090 GN=Tsr1 PE=1 SV=1
TRINITY_DN57996_c0_g1_i1	1	TSPO	BOVINTranslocator protein OS=Bos taurus OX=9913 GN=TSPO PE=2 SV=1
TRINITY_DN52883_c0_g1_i8	1	TSP4B	DANREThrombospondin-4-B OS=Danio rerio OX=7955 GN=thbs4b PE=2 SV=1
TRINITY_DN2077_c0_g1_i3	1	TSP3A	DANREThrombospondin-3a OS=Danio rerio OX=7955 GN=thbs3a PE=2 SV=2
TRINITY_DN28684_c0_g2_i1	1	TSNAX	MOUSETranslin-associated protein X OS=Mus musculus OX=10090 GN=Tsnax PE=1 SV=1
TRINITY_DN5300_c0_g1_i11	1	TSN7	MOUSETetraspanin-7 OS=Mus musculus OX=10090 GN=Tspan7 PE=1 SV=2
TRINITY_DN139_c0_g1_i90	1	TSN7	MOUSETetraspanin-7 OS=Mus musculus OX=10090 GN=Tspan7 PE=1 SV=2
TRINITY_DN139_c0_g1_i94	1	TSN6	BOVINTetraspanin-6 OS=Bos taurus OX=9913 GN=TSPAN6 PE=2 SV=1
TRINITY_DN40067_c0_g1_i3	1	TSN18	BOVINTetraspanin-18 OS=Bos taurus OX=9913 GN=TSPAN18 PE=2 SV=1
TRINITY_DN78954_c0_g1_i1	1	TSGDD	HALVDGlucose import ATP-binding protein TsgD13 OS=Haloferax volcanii (strain ATCC 29605 / DSM 3757 / JCM 8879 / NBRC 14742 / NCIMB 2012 / VKM B-1768 / DS2) OX=309800 GN=tsgD13 PE=3 SV=1
TRINITY_DN383_c3_g1_i2	1	TSC2	HUMANTuberin OS=Homo sapiens OX=9606 GN=TSC2 PE=1 SV=2
TRINITY_DN1302_c0_g1_i5	1	TSC1	MOUSEHamartin OS=Mus musculus OX=10090 GN=Tsc1 PE=1 SV=1
TRINITY_DN129166_c0_g1_i1	1	TSAC	PSEA7Threonylcarbamoyl-AMP synthase OS=Pseudomonas aeruginosa (strain PA7) OX=381754 GN=tsaC PE=3 SV=1
TRINITY_DN1606_c0_g1_i30	1	TS101	HUMANTumor susceptibility gene 101 protein OS=Homo sapiens OX=9606 GN=TSG101 PE=1 SV=2
TRINITY_DN1606_c0_g1_i58	1	TS101	HUMANTumor susceptibility gene 101 protein OS=Homo sapiens OX=9606 GN=TSG101 PE=1 SV=2
TRINITY_DN456_c0_g1_i7	1	TRY3	CANALTranscriptional regulator of yeast form adherence 3 OS=Candida albicans (strain SC5314 / ATCC MYA-2876) OX=237561 GN=TRY3 PE=2 SV=2
TRINITY_DN6954_c0_g1_i10	1	TRXR2	BOVINThioredoxin reductase 2, mitochondrial OS=Bos taurus OX=9913 GN=TXNRD2 PE=1 SV=2
TRINITY_DN7272_c0_g1_i40	1	TRXR1	RATThioredoxin reductase 1, cytoplasmic OS=Rattus norvegicus OX=10116 GN=Txnrd1 PE=1 SV=5
TRINITY_DN123586_c0_g1_i1	1	TRXB3	ARATHNADPH-dependent thioredoxin reductase 3 OS=Arabidopsis thaliana OX=3702 GN=NTRC PE=1 SV=2
TRINITY_DN5548_c0_g1_i1	1	TRXB	PEPLIThioredoxin reductase OS=Peptoclostridium litorale OX=1557 GN=trxB PE=3 SV=1
TRINITY_DN118163_c0_g1_i1	1	TRUB	PSEU5tRNA pseudouridine synthase B OS=Pseudomonas stutzeri (strain A1501) OX=379731 GN=truB PE=3 SV=1
TRINITY_DN65268_c0_g1_i1	1	TRUA	SYNSCtRNA pseudouridine synthase A OS=Synechococcus sp. (strain CC9605) OX=110662 GN=truA PE=3 SV=1
TRINITY_DN3808_c0_g1_i15	1	TRUA	RATtRNA pseudouridine synthase A OS=Rattus norvegicus OX=10116 GN=Pus1 PE=1 SV=2
TRINITY_DN3808_c0_g1_i1	1	TRUA	RATtRNA pseudouridine synthase A OS=Rattus norvegicus OX=10116 GN=Pus1 PE=1 SV=2
TRINITY_DN1026_c0_g1_i2	1	TRRAP	HUMANTransformation/transcription domain-associated protein OS=Homo sapiens OX=9606 GN=TRRAP PE=1 SV=3
TRINITY_DN18237_c0_g1_i11	1	TRPF	ERYLHN-(5'-phosphoribosyl)anthranilate isomerase OS=Erythrobacter litoralis (strain HTCC2594) OX=314225 GN=trpF PE=3 SV=1
TRINITY_DN115722_c0_g1_i1	1	TRPE	ARTGOAnthranilate synthase component 1 OS=Arthrobacter globiformis OX=1665 GN=trpE PE=3 SV=1
TRINITY_DN86335_c0_g1_i1	1	TRPC1	RALSOIndole-3-glycerol phosphate synthase 1 OS=Ralstonia solanacearum (strain GMI1000) OX=267608 GN=trpC1 PE=3 SV=1
TRINITY_DN109562_c0_g1_i1	1	TRPB	LEGPATryptophan synthase beta chain OS=Legionella pneumophila (strain Paris) OX=297246 GN=trpB PE=3 SV=1
TRINITY_DN9655_c0_g3_i1	1	TRPA1	RATTransient receptor potential cation channel subfamily A member 1 OS=Rattus norvegicus OX=10116 GN=Trpa1 PE=2 SV=1
TRINITY_DN445_c0_g1_i15	1	TRPA1	RATTransient receptor potential cation channel subfamily A member 1 OS=Rattus norvegicus OX=10116 GN=Trpa1 PE=2 SV=1
TRINITY_DN7448_c0_g1_i2	1	TRPA1	HUMANTransient receptor potential cation channel subfamily A member 1 OS=Homo sapiens OX=9606 GN=TRPA1 PE=1 SV=3
TRINITY_DN3258_c0_g1_i1	1	TRPA1	DROMETransient receptor potential cation channel subfamily A member 1 OS=Drosophila melanogaster OX=7227 GN=TrpA1 PE=2 SV=4
TRINITY_DN3258_c0_g1_i2	1	TRPA1	DROMETransient receptor potential cation channel subfamily A member 1 OS=Drosophila melanogaster OX=7227 GN=TrpA1 PE=2 SV=4
TRINITY_DN3201_c0_g1_i29	1	TRPA1	DROMETransient receptor potential cation channel subfamily A member 1 OS=Drosophila melanogaster OX=7227 GN=TrpA1 PE=2 SV=4
TRINITY_DN10308_c0_g1_i28	1	TRPA1	DROMETransient receptor potential cation channel subfamily A member 1 OS=Drosophila melanogaster OX=7227 GN=TrpA1 PE=2 SV=4
TRINITY_DN3201_c0_g1_i24	1	TRPA1	DROMETransient receptor potential cation channel subfamily A member 1 OS=Drosophila melanogaster OX=7227 GN=TrpA1 PE=2 SV=4
TRINITY_DN23855_c0_g1_i1	1	TRPA1	CAEELTransient receptor potential cation channel subfamily A member 1 homolog OS=Caenorhabditis elegans OX=6239 GN=trpa-1 PE=2 SV=5
TRINITY_DN2235_c0_g1_i16	1	TRNK1	MOUSETPR and ankyrin repeat-containing protein 1 OS=Mus musculus OX=10090 GN=Trank1 PE=2 SV=3
TRINITY_DN131_c4_g1_i3	1	TRNK1	MOUSETPR and ankyrin repeat-containing protein 1 OS=Mus musculus OX=10090 GN=Trank1 PE=2 SV=3
TRINITY_DN30189_c0_g1_i1	1	TRNK1	MOUSETPR and ankyrin repeat-containing protein 1 OS=Mus musculus OX=10090 GN=Trank1 PE=2 SV=3
TRINITY_DN511_c0_g1_i12	1	TRNK1	HUMANTPR and ankyrin repeat-containing protein 1 OS=Homo sapiens OX=9606 GN=TRANK1 PE=2 SV=4
TRINITY_DN75719_c0_g1_i1	1	TRMD	CHRSDtRNA (guanine-N(1)-)-methyltransferase OS=Chromohalobacter salexigens (strain DSM 3043 / ATCC BAA-138 / NCIMB 13768) OX=290398 GN=trmD PE=3 SV=1
TRINITY_DN0_c0_g1_i34	1	TRM61	MOUSEtRNA (adenine(58)-N(1))-methyltransferase catalytic subunit TRMT61A OS=Mus musculus OX=10090 GN=Trmt61a PE=1 SV=1
TRINITY_DN0_c0_g1_i39	1	TRM61	MOUSEtRNA (adenine(58)-N(1))-methyltransferase catalytic subunit TRMT61A OS=Mus musculus OX=10090 GN=Trmt61a PE=1 SV=1
TRINITY_DN0_c0_g1_i11	1	TRM61	MOUSEtRNA (adenine(58)-N(1))-methyltransferase catalytic subunit TRMT61A OS=Mus musculus OX=10090 GN=Trmt61a PE=1 SV=1
TRINITY_DN0_c0_g1_i48	1	TRM61	MOUSEtRNA (adenine(58)-N(1))-methyltransferase catalytic subunit TRMT61A OS=Mus musculus OX=10090 GN=Trmt61a PE=1 SV=1
TRINITY_DN0_c0_g1_i56	1	TRM61	MOUSEtRNA (adenine(58)-N(1))-methyltransferase catalytic subunit TRMT61A OS=Mus musculus OX=10090 GN=Trmt61a PE=1 SV=1
TRINITY_DN3746_c0_g1_i116	1	TRM6	MOUSEtRNA (adenine(58)-N(1))-methyltransferase non-catalytic subunit TRM6 OS=Mus musculus OX=10090 GN=Trmt6 PE=1 SV=1
TRINITY_DN3746_c0_g1_i141	1	TRM6	MOUSEtRNA (adenine(58)-N(1))-methyltransferase non-catalytic subunit TRM6 OS=Mus musculus OX=10090 GN=Trmt6 PE=1 SV=1
TRINITY_DN75472_c0_g1_i1	1	TRM5	DANREtRNA (guanine(37)-N1)-methyltransferase OS=Danio rerio OX=7955 GN=trmt5 PE=3 SV=1
TRINITY_DN1306_c0_g1_i30	1	TRM44	XENLAProbable tRNA (uracil-O(2)-)-methyltransferase OS=Xenopus laevis OX=8355 GN=trmt44 PE=2 SV=1
TRINITY_DN379_c0_g1_i12	1	TRM2A	HUMANtRNA (uracil-5-)-methyltransferase homolog A OS=Homo sapiens OX=9606 GN=TRMT2A PE=1 SV=2
TRINITY_DN20694_c0_g1_i2	1	TRM10	CANALtRNA (guanine(9)-N1)-methyltransferase OS=Candida albicans (strain SC5314 / ATCC MYA-2876) OX=237561 GN=TRM10 PE=3 SV=1
TRINITY_DN15279_c0_g1_i22	1	TRM1	MOUSEtRNA (guanine(26)-N(2))-dimethyltransferase OS=Mus musculus OX=10090 GN=Trmt1 PE=1 SV=2
TRINITY_DN1582_c0_g1_i45	1	TRIPC	XENTRE3 ubiquitin-protein ligase TRIP12 OS=Xenopus tropicalis OX=8364 GN=trip12 PE=2 SV=1
TRINITY_DN1582_c0_g1_i101	1	TRIPC	XENTRE3 ubiquitin-protein ligase TRIP12 OS=Xenopus tropicalis OX=8364 GN=trip12 PE=2 SV=1
TRINITY_DN13641_c0_g1_i3	1	TRIP4	HUMANActivating signal cointegrator 1 OS=Homo sapiens OX=9606 GN=TRIP4 PE=1 SV=4
TRINITY_DN11403_c0_g1_i7	1	TRIM9	DROMEE3 ubiquitin-protein ligase TRIM9 OS=Drosophila melanogaster OX=7227 GN=Trim9 PE=1 SV=1
TRINITY_DN1721_c0_g1_i61	1	TRIM3	MOUSETripartite motif-containing protein 3 OS=Mus musculus OX=10090 GN=Trim3 PE=1 SV=1
TRINITY_DN21_c0_g1_i11	1	TRIM3	MOUSETripartite motif-containing protein 3 OS=Mus musculus OX=10090 GN=Trim3 PE=1 SV=1
TRINITY_DN415_c0_g1_i14	1	TRIM2	MOUSETripartite motif-containing protein 2 OS=Mus musculus OX=10090 GN=Trim2 PE=1 SV=1
TRINITY_DN415_c0_g1_i6	1	TRIM2	HUMANTripartite motif-containing protein 2 OS=Homo sapiens OX=9606 GN=TRIM2 PE=1 SV=1
TRINITY_DN37453_c0_g1_i13	1	TRIM2	HUMANTripartite motif-containing protein 2 OS=Homo sapiens OX=9606 GN=TRIM2 PE=1 SV=1
TRINITY_DN43295_c0_g1_i11	1	TRIM2	CALJATripartite motif-containing protein 2 OS=Callithrix jacchus OX=9483 GN=TRIM2 PE=3 SV=1
TRINITY_DN43295_c0_g1_i5	1	TRIM2	CALJATripartite motif-containing protein 2 OS=Callithrix jacchus OX=9483 GN=TRIM2 PE=3 SV=1
TRINITY_DN46017_c0_g1_i1	1	TRIM2	BOVINTripartite motif-containing protein 2 OS=Bos taurus OX=9913 GN=TRIM2 PE=2 SV=1
TRINITY_DN15941_c0_g1_i21	1	TRIM2	AILMETripartite motif-containing protein 2 OS=Ailuropoda melanoleuca OX=9646 GN=TRIM2 PE=3 SV=1
TRINITY_DN15941_c0_g1_i12	1	TRIM2	AILMETripartite motif-containing protein 2 OS=Ailuropoda melanoleuca OX=9646 GN=TRIM2 PE=3 SV=1
TRINITY_DN3284_c0_g1_i12	1	TRIM2	AILMETripartite motif-containing protein 2 OS=Ailuropoda melanoleuca OX=9646 GN=TRIM2 PE=3 SV=1
TRINITY_DN15941_c0_g1_i14	1	TRIM2	AILMETripartite motif-containing protein 2 OS=Ailuropoda melanoleuca OX=9646 GN=TRIM2 PE=3 SV=1
TRINITY_DN15941_c0_g1_i24	1	TRIM2	AILMETripartite motif-containing protein 2 OS=Ailuropoda melanoleuca OX=9646 GN=TRIM2 PE=3 SV=1
TRINITY_DN929_c0_g1_i11	1	TRIB1	HUMANTribbles homolog 1 OS=Homo sapiens OX=9606 GN=TRIB1 PE=1 SV=2
TRINITY_DN7563_c0_g1_i27	1	TRI59	HUMANTripartite motif-containing protein 59 OS=Homo sapiens OX=9606 GN=TRIM59 PE=1 SV=1
TRINITY_DN50686_c0_g1_i4	1	TRI59	HUMANTripartite motif-containing protein 59 OS=Homo sapiens OX=9606 GN=TRIM59 PE=1 SV=1
TRINITY_DN7563_c0_g1_i37	1	TRI59	HUMANTripartite motif-containing protein 59 OS=Homo sapiens OX=9606 GN=TRIM59 PE=1 SV=1
TRINITY_DN46017_c0_g1_i2	1	TRI56	MOUSEE3 ubiquitin-protein ligase TRIM56 OS=Mus musculus OX=10090 GN=Trim56 PE=1 SV=1
TRINITY_DN415_c0_g1_i12	1	TRI56	BOVINE3 ubiquitin-protein ligase TRIM56 OS=Bos taurus OX=9913 GN=TRIM56 PE=2 SV=1
TRINITY_DN11579_c0_g1_i1	1	TRI45	MOUSETripartite motif-containing protein 45 OS=Mus musculus OX=10090 GN=Trim45 PE=2 SV=2
TRINITY_DN1279_c0_g1_i8	1	TRI45	BOVINTripartite motif-containing protein 45 OS=Bos taurus OX=9913 GN=TRIM45 PE=2 SV=1
TRINITY_DN11364_c0_g2_i8	1	TRI33	XENLAE3 ubiquitin-protein ligase TRIM33 OS=Xenopus laevis OX=8355 GN=trim33 PE=1 SV=1
TRINITY_DN33375_c0_g1_i1	1	TRI33	HUMANE3 ubiquitin-protein ligase TRIM33 OS=Homo sapiens OX=9606 GN=TRIM33 PE=1 SV=3
TRINITY_DN33375_c0_g1_i5	1	TRI33	HUMANE3 ubiquitin-protein ligase TRIM33 OS=Homo sapiens OX=9606 GN=TRIM33 PE=1 SV=3
TRINITY_DN17470_c0_g1_i5	1	TRI33	DANREE3 ubiquitin-protein ligase TRIM33 OS=Danio rerio OX=7955 GN=trim33 PE=2 SV=1
TRINITY_DN11897_c0_g1_i23	1	TRI33	DANREE3 ubiquitin-protein ligase TRIM33 OS=Danio rerio OX=7955 GN=trim33 PE=2 SV=1
TRINITY_DN11897_c0_g1_i28	1	TRI33	DANREE3 ubiquitin-protein ligase TRIM33 OS=Danio rerio OX=7955 GN=trim33 PE=2 SV=1
TRINITY_DN16730_c0_g1_i17	1	TRI33	DANREE3 ubiquitin-protein ligase TRIM33 OS=Danio rerio OX=7955 GN=trim33 PE=2 SV=1
TRINITY_DN11897_c0_g1_i20	1	TRI33	DANREE3 ubiquitin-protein ligase TRIM33 OS=Danio rerio OX=7955 GN=trim33 PE=2 SV=1
TRINITY_DN17470_c0_g1_i10	1	TRI33	DANREE3 ubiquitin-protein ligase TRIM33 OS=Danio rerio OX=7955 GN=trim33 PE=2 SV=1
TRINITY_DN16730_c0_g1_i10	1	TRI33	DANREE3 ubiquitin-protein ligase TRIM33 OS=Danio rerio OX=7955 GN=trim33 PE=2 SV=1
TRINITY_DN1520_c1_g1_i10	1	TRI23	HUMANE3 ubiquitin-protein ligase TRIM23 OS=Homo sapiens OX=9606 GN=TRIM23 PE=1 SV=1
TRINITY_DN1520_c1_g1_i4	1	TRI23	HUMANE3 ubiquitin-protein ligase TRIM23 OS=Homo sapiens OX=9606 GN=TRIM23 PE=1 SV=1
TRINITY_DN1520_c1_g1_i1	1	TRI23	HUMANE3 ubiquitin-protein ligase TRIM23 OS=Homo sapiens OX=9606 GN=TRIM23 PE=1 SV=1
TRINITY_DN8321_c0_g1_i2	1	TRI13	XENTRTripartite motif containing 13 OS=Xenopus tropicalis OX=8364 GN=trim13 PE=3 SV=1
TRINITY_DN98420_c0_g1_i1	1	TRHBN	SYNY3Group 1 truncated hemoglobin GlbN OS=Synechocystis sp. (strain PCC 6803 / Kazusa) OX=1111708 GN=glbN PE=1 SV=1
TRINITY_DN7692_c0_g1_i13	1	TRF6B	XENLATNF receptor-associated factor 6-B OS=Xenopus laevis OX=8355 GN=traf6-b PE=2 SV=1
TRINITY_DN7692_c0_g1_i2	1	TRF6B	XENLATNF receptor-associated factor 6-B OS=Xenopus laevis OX=8355 GN=traf6-b PE=2 SV=1
TRINITY_DN7692_c0_g1_i11	1	TRF6B	XENLATNF receptor-associated factor 6-B OS=Xenopus laevis OX=8355 GN=traf6-b PE=2 SV=1
TRINITY_DN447_c0_g1_i17	1	TRF6B	XENLATNF receptor-associated factor 6-B OS=Xenopus laevis OX=8355 GN=traf6-b PE=2 SV=1
TRINITY_DN56799_c0_g1_i9	1	TRF6B	XENLATNF receptor-associated factor 6-B OS=Xenopus laevis OX=8355 GN=traf6-b PE=2 SV=1
TRINITY_DN27890_c0_g1_i14	1	TRF6A	XENLATNF receptor-associated factor 6-A OS=Xenopus laevis OX=8355 GN=traf6-a PE=1 SV=1
TRINITY_DN20235_c0_g1_i4	1	TRDMT	HUMANtRNA (cytosine(38)-C(5))-methyltransferase OS=Homo sapiens OX=9606 GN=TRDMT1 PE=1 SV=1
TRINITY_DN22742_c0_g1_i5	1	TRD7B	DANRETudor domain-containing protein 7B OS=Danio rerio OX=7955 GN=tdrd7b PE=3 SV=2
TRINITY_DN1623_c0_g1_i26	1	TRCB	XENLABeta-TrCP OS=Xenopus laevis OX=8355 GN=fbxw1 PE=1 SV=1
TRINITY_DN7467_c0_g1_i4	1	TRBM	MOUSEThrombomodulin OS=Mus musculus OX=10090 GN=Thbd PE=1 SV=1
TRINITY_DN8688_c0_g1_i1	1	TRBM	MOUSEThrombomodulin OS=Mus musculus OX=10090 GN=Thbd PE=1 SV=1
TRINITY_DN54616_c0_g1_i1	1	TRBM	MOUSEThrombomodulin OS=Mus musculus OX=10090 GN=Thbd PE=1 SV=1
TRINITY_DN14927_c0_g1_i17	1	TRAF7	MOUSEE3 ubiquitin-protein ligase TRAF7 OS=Mus musculus OX=10090 GN=Traf7 PE=1 SV=1
TRINITY_DN14927_c0_g1_i79	1	TRAF7	MOUSEE3 ubiquitin-protein ligase TRAF7 OS=Mus musculus OX=10090 GN=Traf7 PE=1 SV=1
TRINITY_DN10194_c0_g1_i12	1	TRAF6	XENTRTNF receptor-associated factor 6 OS=Xenopus tropicalis OX=8364 GN=traf6 PE=2 SV=1
TRINITY_DN37347_c0_g1_i4	1	TRAF6	XENTRTNF receptor-associated factor 6 OS=Xenopus tropicalis OX=8364 GN=traf6 PE=2 SV=1
TRINITY_DN34486_c0_g1_i1	1	TRAF6	XENTRTNF receptor-associated factor 6 OS=Xenopus tropicalis OX=8364 GN=traf6 PE=2 SV=1
TRINITY_DN30936_c0_g1_i10	1	TRAF6	XENTRTNF receptor-associated factor 6 OS=Xenopus tropicalis OX=8364 GN=traf6 PE=2 SV=1
TRINITY_DN12050_c0_g1_i3	1	TRAF6	XENTRTNF receptor-associated factor 6 OS=Xenopus tropicalis OX=8364 GN=traf6 PE=2 SV=1
TRINITY_DN1093_c0_g1_i5	1	TRAF6	RATTNF receptor-associated factor 6 OS=Rattus norvegicus OX=10116 GN=Traf6 PE=2 SV=1
TRINITY_DN7692_c0_g1_i12	1	TRAF6	RATTNF receptor-associated factor 6 OS=Rattus norvegicus OX=10116 GN=Traf6 PE=2 SV=1
TRINITY_DN15358_c0_g2_i14	1	TRAF6	RATTNF receptor-associated factor 6 OS=Rattus norvegicus OX=10116 GN=Traf6 PE=2 SV=1
TRINITY_DN6600_c0_g1_i12	1	TRAF6	MOUSETNF receptor-associated factor 6 OS=Mus musculus OX=10090 GN=Traf6 PE=1 SV=2
TRINITY_DN4851_c0_g1_i3	1	TRAF6	MOUSETNF receptor-associated factor 6 OS=Mus musculus OX=10090 GN=Traf6 PE=1 SV=2
TRINITY_DN6651_c0_g1_i3	1	TRAF6	MOUSETNF receptor-associated factor 6 OS=Mus musculus OX=10090 GN=Traf6 PE=1 SV=2
TRINITY_DN12050_c0_g1_i8	1	TRAF6	MOUSETNF receptor-associated factor 6 OS=Mus musculus OX=10090 GN=Traf6 PE=1 SV=2
TRINITY_DN30936_c0_g1_i4	1	TRAF6	MOUSETNF receptor-associated factor 6 OS=Mus musculus OX=10090 GN=Traf6 PE=1 SV=2
TRINITY_DN3779_c0_g1_i1	1	TRAF6	MOUSETNF receptor-associated factor 6 OS=Mus musculus OX=10090 GN=Traf6 PE=1 SV=2
TRINITY_DN6600_c0_g1_i16	1	TRAF6	MOUSETNF receptor-associated factor 6 OS=Mus musculus OX=10090 GN=Traf6 PE=1 SV=2
TRINITY_DN4851_c0_g1_i10	1	TRAF6	MOUSETNF receptor-associated factor 6 OS=Mus musculus OX=10090 GN=Traf6 PE=1 SV=2
TRINITY_DN1861_c0_g1_i2	1	TRAF6	MACMUTNF receptor-associated factor 6 OS=Macaca mulatta OX=9544 GN=TRAF6 PE=2 SV=1
TRINITY_DN7385_c0_g1_i1	1	TRAF6	HUMANTNF receptor-associated factor 6 OS=Homo sapiens OX=9606 GN=TRAF6 PE=1 SV=1
TRINITY_DN2736_c0_g1_i18	1	TRAF6	DANRETNF receptor-associated factor 6 OS=Danio rerio OX=7955 GN=traf6 PE=1 SV=2
TRINITY_DN2736_c0_g1_i6	1	TRAF6	DANRETNF receptor-associated factor 6 OS=Danio rerio OX=7955 GN=traf6 PE=1 SV=2
TRINITY_DN15358_c0_g1_i3	1	TRAF6	DANRETNF receptor-associated factor 6 OS=Danio rerio OX=7955 GN=traf6 PE=1 SV=2
TRINITY_DN17508_c1_g1_i4	1	TRAF6	DANRETNF receptor-associated factor 6 OS=Danio rerio OX=7955 GN=traf6 PE=1 SV=2
TRINITY_DN17508_c1_g1_i3	1	TRAF6	DANRETNF receptor-associated factor 6 OS=Danio rerio OX=7955 GN=traf6 PE=1 SV=2
TRINITY_DN35678_c0_g1_i1	1	TRAF6	DANRETNF receptor-associated factor 6 OS=Danio rerio OX=7955 GN=traf6 PE=1 SV=2
TRINITY_DN2736_c0_g1_i2	1	TRAF6	DANRETNF receptor-associated factor 6 OS=Danio rerio OX=7955 GN=traf6 PE=1 SV=2
TRINITY_DN2736_c0_g1_i14	1	TRAF6	DANRETNF receptor-associated factor 6 OS=Danio rerio OX=7955 GN=traf6 PE=1 SV=2
TRINITY_DN1360_c1_g1_i3	1	TRAF6	DANRETNF receptor-associated factor 6 OS=Danio rerio OX=7955 GN=traf6 PE=1 SV=2
TRINITY_DN30_c38_g1_i12	1	TRAF6	DANRETNF receptor-associated factor 6 OS=Danio rerio OX=7955 GN=traf6 PE=1 SV=2
TRINITY_DN24572_c0_g1_i2	1	TRAF6	DANRETNF receptor-associated factor 6 OS=Danio rerio OX=7955 GN=traf6 PE=1 SV=2
TRINITY_DN14043_c0_g1_i12	1	TRAF6	DANRETNF receptor-associated factor 6 OS=Danio rerio OX=7955 GN=traf6 PE=1 SV=2
TRINITY_DN2736_c0_g1_i13	1	TRAF6	DANRETNF receptor-associated factor 6 OS=Danio rerio OX=7955 GN=traf6 PE=1 SV=2
TRINITY_DN28219_c0_g1_i2	1	TRAF6	CERATTNF receptor-associated factor 6 OS=Cercocebus atys OX=9531 GN=TRAF6 PE=2 SV=1
TRINITY_DN14043_c0_g1_i1	1	TRAF6	BOVINTNF receptor-associated factor 6 OS=Bos taurus OX=9913 GN=TRAF6 PE=2 SV=1
TRINITY_DN2165_c0_g1_i11	1	TRAF5	MOUSETNF receptor-associated factor 5 OS=Mus musculus OX=10090 GN=Traf5 PE=1 SV=1
TRINITY_DN12838_c1_g1_i1	1	TRAF5	MOUSETNF receptor-associated factor 5 OS=Mus musculus OX=10090 GN=Traf5 PE=1 SV=1
TRINITY_DN7079_c3_g3_i2	1	TRAF5	MOUSETNF receptor-associated factor 5 OS=Mus musculus OX=10090 GN=Traf5 PE=1 SV=1
TRINITY_DN18439_c0_g2_i2	1	TRAF5	MOUSETNF receptor-associated factor 5 OS=Mus musculus OX=10090 GN=Traf5 PE=1 SV=1
TRINITY_DN24572_c0_g1_i3	1	TRAF5	MOUSETNF receptor-associated factor 5 OS=Mus musculus OX=10090 GN=Traf5 PE=1 SV=1
TRINITY_DN8108_c2_g1_i1	1	TRAF5	MOUSETNF receptor-associated factor 5 OS=Mus musculus OX=10090 GN=Traf5 PE=1 SV=1
TRINITY_DN13161_c0_g1_i16	1	TRAF5	MOUSETNF receptor-associated factor 5 OS=Mus musculus OX=10090 GN=Traf5 PE=1 SV=1
TRINITY_DN24261_c0_g1_i11	1	TRAF5	MOUSETNF receptor-associated factor 5 OS=Mus musculus OX=10090 GN=Traf5 PE=1 SV=1
TRINITY_DN31472_c0_g1_i2	1	TRAF5	MOUSETNF receptor-associated factor 5 OS=Mus musculus OX=10090 GN=Traf5 PE=1 SV=1
TRINITY_DN24261_c0_g1_i8	1	TRAF5	MOUSETNF receptor-associated factor 5 OS=Mus musculus OX=10090 GN=Traf5 PE=1 SV=1
TRINITY_DN10583_c0_g4_i4	1	TRAF5	MOUSETNF receptor-associated factor 5 OS=Mus musculus OX=10090 GN=Traf5 PE=1 SV=1
TRINITY_DN4187_c0_g1_i26	1	TRAF5	MOUSETNF receptor-associated factor 5 OS=Mus musculus OX=10090 GN=Traf5 PE=1 SV=1
TRINITY_DN39940_c0_g2_i2	1	TRAF5	MOUSETNF receptor-associated factor 5 OS=Mus musculus OX=10090 GN=Traf5 PE=1 SV=1
TRINITY_DN12619_c0_g1_i5	1	TRAF5	MOUSETNF receptor-associated factor 5 OS=Mus musculus OX=10090 GN=Traf5 PE=1 SV=1
TRINITY_DN17508_c0_g1_i9	1	TRAF5	MOUSETNF receptor-associated factor 5 OS=Mus musculus OX=10090 GN=Traf5 PE=1 SV=1
TRINITY_DN105_c2_g1_i24	1	TRAF5	MOUSETNF receptor-associated factor 5 OS=Mus musculus OX=10090 GN=Traf5 PE=1 SV=1
TRINITY_DN14253_c0_g1_i2	1	TRAF5	MOUSETNF receptor-associated factor 5 OS=Mus musculus OX=10090 GN=Traf5 PE=1 SV=1
TRINITY_DN2716_c0_g1_i4	1	TRAF5	MOUSETNF receptor-associated factor 5 OS=Mus musculus OX=10090 GN=Traf5 PE=1 SV=1
TRINITY_DN24118_c0_g2_i2	1	TRAF5	MOUSETNF receptor-associated factor 5 OS=Mus musculus OX=10090 GN=Traf5 PE=1 SV=1
TRINITY_DN27382_c0_g1_i13	1	TRAF5	MOUSETNF receptor-associated factor 5 OS=Mus musculus OX=10090 GN=Traf5 PE=1 SV=1
TRINITY_DN12017_c0_g2_i42	1	TRAF5	MOUSETNF receptor-associated factor 5 OS=Mus musculus OX=10090 GN=Traf5 PE=1 SV=1
TRINITY_DN2165_c0_g1_i14	1	TRAF5	MOUSETNF receptor-associated factor 5 OS=Mus musculus OX=10090 GN=Traf5 PE=1 SV=1
TRINITY_DN18439_c0_g2_i7	1	TRAF5	MOUSETNF receptor-associated factor 5 OS=Mus musculus OX=10090 GN=Traf5 PE=1 SV=1
TRINITY_DN12838_c0_g1_i26	1	TRAF5	MOUSETNF receptor-associated factor 5 OS=Mus musculus OX=10090 GN=Traf5 PE=1 SV=1
TRINITY_DN58311_c0_g1_i2	1	TRAF5	MOUSETNF receptor-associated factor 5 OS=Mus musculus OX=10090 GN=Traf5 PE=1 SV=1
TRINITY_DN140_c0_g1_i57	1	TRAF5	MOUSETNF receptor-associated factor 5 OS=Mus musculus OX=10090 GN=Traf5 PE=1 SV=1
TRINITY_DN44838_c1_g1_i1	1	TRAF5	MOUSETNF receptor-associated factor 5 OS=Mus musculus OX=10090 GN=Traf5 PE=1 SV=1
TRINITY_DN12241_c0_g2_i5	1	TRAF5	MOUSETNF receptor-associated factor 5 OS=Mus musculus OX=10090 GN=Traf5 PE=1 SV=1
TRINITY_DN17508_c0_g1_i6	1	TRAF5	MOUSETNF receptor-associated factor 5 OS=Mus musculus OX=10090 GN=Traf5 PE=1 SV=1
TRINITY_DN1346_c1_g1_i13	1	TRAF5	HUMANTNF receptor-associated factor 5 OS=Homo sapiens OX=9606 GN=TRAF5 PE=1 SV=2
TRINITY_DN439_c0_g1_i6	1	TRAF5	HUMANTNF receptor-associated factor 5 OS=Homo sapiens OX=9606 GN=TRAF5 PE=1 SV=2
TRINITY_DN12050_c0_g1_i9	1	TRAF5	HUMANTNF receptor-associated factor 5 OS=Homo sapiens OX=9606 GN=TRAF5 PE=1 SV=2
TRINITY_DN4722_c1_g1_i3	1	TRAF5	HUMANTNF receptor-associated factor 5 OS=Homo sapiens OX=9606 GN=TRAF5 PE=1 SV=2
TRINITY_DN439_c0_g1_i4	1	TRAF5	HUMANTNF receptor-associated factor 5 OS=Homo sapiens OX=9606 GN=TRAF5 PE=1 SV=2
TRINITY_DN4081_c0_g2_i1	1	TRAF5	HUMANTNF receptor-associated factor 5 OS=Homo sapiens OX=9606 GN=TRAF5 PE=1 SV=2
TRINITY_DN40296_c0_g1_i1	1	TRAF5	HUMANTNF receptor-associated factor 5 OS=Homo sapiens OX=9606 GN=TRAF5 PE=1 SV=2
TRINITY_DN439_c0_g1_i11	1	TRAF5	HUMANTNF receptor-associated factor 5 OS=Homo sapiens OX=9606 GN=TRAF5 PE=1 SV=2
TRINITY_DN4586_c0_g2_i1	1	TRAF5	HUMANTNF receptor-associated factor 5 OS=Homo sapiens OX=9606 GN=TRAF5 PE=1 SV=2
TRINITY_DN19120_c0_g1_i6	1	TRAF5	HUMANTNF receptor-associated factor 5 OS=Homo sapiens OX=9606 GN=TRAF5 PE=1 SV=2
TRINITY_DN4868_c0_g1_i16	1	TRAF5	HUMANTNF receptor-associated factor 5 OS=Homo sapiens OX=9606 GN=TRAF5 PE=1 SV=2
TRINITY_DN439_c0_g1_i8	1	TRAF5	HUMANTNF receptor-associated factor 5 OS=Homo sapiens OX=9606 GN=TRAF5 PE=1 SV=2
TRINITY_DN13095_c0_g1_i7	1	TRAF5	HUMANTNF receptor-associated factor 5 OS=Homo sapiens OX=9606 GN=TRAF5 PE=1 SV=2
TRINITY_DN4187_c0_g1_i5	1	TRAF5	HUMANTNF receptor-associated factor 5 OS=Homo sapiens OX=9606 GN=TRAF5 PE=1 SV=2
TRINITY_DN104412_c0_g1_i1	1	TRAF5	HUMANTNF receptor-associated factor 5 OS=Homo sapiens OX=9606 GN=TRAF5 PE=1 SV=2
TRINITY_DN13095_c0_g1_i16	1	TRAF5	HUMANTNF receptor-associated factor 5 OS=Homo sapiens OX=9606 GN=TRAF5 PE=1 SV=2
TRINITY_DN4081_c0_g1_i1	1	TRAF5	HUMANTNF receptor-associated factor 5 OS=Homo sapiens OX=9606 GN=TRAF5 PE=1 SV=2
TRINITY_DN909_c0_g1_i1	1	TRAF5	HUMANTNF receptor-associated factor 5 OS=Homo sapiens OX=9606 GN=TRAF5 PE=1 SV=2
TRINITY_DN18133_c0_g1_i4	1	TRAF5	HUMANTNF receptor-associated factor 5 OS=Homo sapiens OX=9606 GN=TRAF5 PE=1 SV=2
TRINITY_DN1346_c1_g1_i16	1	TRAF5	HUMANTNF receptor-associated factor 5 OS=Homo sapiens OX=9606 GN=TRAF5 PE=1 SV=2
TRINITY_DN11725_c0_g3_i1	1	TRAF5	HUMANTNF receptor-associated factor 5 OS=Homo sapiens OX=9606 GN=TRAF5 PE=1 SV=2
TRINITY_DN1346_c1_g1_i6	1	TRAF5	HUMANTNF receptor-associated factor 5 OS=Homo sapiens OX=9606 GN=TRAF5 PE=1 SV=2
TRINITY_DN4868_c0_g1_i1	1	TRAF5	HUMANTNF receptor-associated factor 5 OS=Homo sapiens OX=9606 GN=TRAF5 PE=1 SV=2
TRINITY_DN439_c0_g1_i3	1	TRAF5	HUMANTNF receptor-associated factor 5 OS=Homo sapiens OX=9606 GN=TRAF5 PE=1 SV=2
TRINITY_DN909_c0_g2_i10	1	TRAF5	HUMANTNF receptor-associated factor 5 OS=Homo sapiens OX=9606 GN=TRAF5 PE=1 SV=2
TRINITY_DN16133_c0_g1_i9	1	TRAF5	HUMANTNF receptor-associated factor 5 OS=Homo sapiens OX=9606 GN=TRAF5 PE=1 SV=2
TRINITY_DN57751_c0_g1_i3	1	TRAF5	HUMANTNF receptor-associated factor 5 OS=Homo sapiens OX=9606 GN=TRAF5 PE=1 SV=2
TRINITY_DN439_c0_g1_i5	1	TRAF5	HUMANTNF receptor-associated factor 5 OS=Homo sapiens OX=9606 GN=TRAF5 PE=1 SV=2
TRINITY_DN22107_c0_g2_i1	1	TRAF5	HUMANTNF receptor-associated factor 5 OS=Homo sapiens OX=9606 GN=TRAF5 PE=1 SV=2
TRINITY_DN25402_c0_g1_i8	1	TRAF5	HUMANTNF receptor-associated factor 5 OS=Homo sapiens OX=9606 GN=TRAF5 PE=1 SV=2
TRINITY_DN1346_c1_g1_i25	1	TRAF5	HUMANTNF receptor-associated factor 5 OS=Homo sapiens OX=9606 GN=TRAF5 PE=1 SV=2
TRINITY_DN2165_c0_g1_i4	1	TRAF4	MOUSETNF receptor-associated factor 4 OS=Mus musculus OX=10090 GN=Traf4 PE=1 SV=2
TRINITY_DN2952_c0_g1_i13	1	TRAF4	MOUSETNF receptor-associated factor 4 OS=Mus musculus OX=10090 GN=Traf4 PE=1 SV=2
TRINITY_DN37077_c0_g2_i1	1	TRAF4	MOUSETNF receptor-associated factor 4 OS=Mus musculus OX=10090 GN=Traf4 PE=1 SV=2
TRINITY_DN37077_c0_g2_i6	1	TRAF4	MOUSETNF receptor-associated factor 4 OS=Mus musculus OX=10090 GN=Traf4 PE=1 SV=2
TRINITY_DN5140_c0_g2_i27	1	TRAF4	MOUSETNF receptor-associated factor 4 OS=Mus musculus OX=10090 GN=Traf4 PE=1 SV=2
TRINITY_DN1934_c0_g1_i3	1	TRAF4	MOUSETNF receptor-associated factor 4 OS=Mus musculus OX=10090 GN=Traf4 PE=1 SV=2
TRINITY_DN57751_c0_g1_i2	1	TRAF4	MOUSETNF receptor-associated factor 4 OS=Mus musculus OX=10090 GN=Traf4 PE=1 SV=2
TRINITY_DN14063_c1_g1_i1	1	TRAF4	MOUSETNF receptor-associated factor 4 OS=Mus musculus OX=10090 GN=Traf4 PE=1 SV=2
TRINITY_DN37077_c0_g2_i5	1	TRAF4	MOUSETNF receptor-associated factor 4 OS=Mus musculus OX=10090 GN=Traf4 PE=1 SV=2
TRINITY_DN1174_c0_g1_i10	1	TRAF4	MOUSETNF receptor-associated factor 4 OS=Mus musculus OX=10090 GN=Traf4 PE=1 SV=2
TRINITY_DN1174_c0_g1_i12	1	TRAF4	MOUSETNF receptor-associated factor 4 OS=Mus musculus OX=10090 GN=Traf4 PE=1 SV=2
TRINITY_DN11857_c0_g1_i6	1	TRAF4	MOUSETNF receptor-associated factor 4 OS=Mus musculus OX=10090 GN=Traf4 PE=1 SV=2
TRINITY_DN1065_c1_g1_i20	1	TRAF4	MOUSETNF receptor-associated factor 4 OS=Mus musculus OX=10090 GN=Traf4 PE=1 SV=2
TRINITY_DN11857_c0_g1_i16	1	TRAF4	MOUSETNF receptor-associated factor 4 OS=Mus musculus OX=10090 GN=Traf4 PE=1 SV=2
TRINITY_DN27868_c0_g1_i7	1	TRAF4	MOUSETNF receptor-associated factor 4 OS=Mus musculus OX=10090 GN=Traf4 PE=1 SV=2
TRINITY_DN2952_c0_g1_i8	1	TRAF4	MOUSETNF receptor-associated factor 4 OS=Mus musculus OX=10090 GN=Traf4 PE=1 SV=2
TRINITY_DN2165_c0_g1_i18	1	TRAF4	MOUSETNF receptor-associated factor 4 OS=Mus musculus OX=10090 GN=Traf4 PE=1 SV=2
TRINITY_DN2952_c0_g1_i14	1	TRAF4	MOUSETNF receptor-associated factor 4 OS=Mus musculus OX=10090 GN=Traf4 PE=1 SV=2
TRINITY_DN53_c0_g1_i7	1	TRAF4	MOUSETNF receptor-associated factor 4 OS=Mus musculus OX=10090 GN=Traf4 PE=1 SV=2
TRINITY_DN21535_c0_g1_i18	1	TRAF4	MOUSETNF receptor-associated factor 4 OS=Mus musculus OX=10090 GN=Traf4 PE=1 SV=2
TRINITY_DN13267_c0_g1_i35	1	TRAF4	MOUSETNF receptor-associated factor 4 OS=Mus musculus OX=10090 GN=Traf4 PE=1 SV=2
TRINITY_DN37077_c0_g2_i14	1	TRAF4	MOUSETNF receptor-associated factor 4 OS=Mus musculus OX=10090 GN=Traf4 PE=1 SV=2
TRINITY_DN37077_c0_g2_i3	1	TRAF4	MOUSETNF receptor-associated factor 4 OS=Mus musculus OX=10090 GN=Traf4 PE=1 SV=2
TRINITY_DN26586_c0_g1_i31	1	TRAF4	MOUSETNF receptor-associated factor 4 OS=Mus musculus OX=10090 GN=Traf4 PE=1 SV=2
TRINITY_DN4482_c0_g1_i6	1	TRAF4	MOUSETNF receptor-associated factor 4 OS=Mus musculus OX=10090 GN=Traf4 PE=1 SV=2
TRINITY_DN1174_c0_g1_i13	1	TRAF4	MOUSETNF receptor-associated factor 4 OS=Mus musculus OX=10090 GN=Traf4 PE=1 SV=2
TRINITY_DN5165_c0_g1_i7	1	TRAF4	MOUSETNF receptor-associated factor 4 OS=Mus musculus OX=10090 GN=Traf4 PE=1 SV=2
TRINITY_DN7879_c0_g1_i21	1	TRAF4	MOUSETNF receptor-associated factor 4 OS=Mus musculus OX=10090 GN=Traf4 PE=1 SV=2
TRINITY_DN7079_c1_g1_i3	1	TRAF4	MOUSETNF receptor-associated factor 4 OS=Mus musculus OX=10090 GN=Traf4 PE=1 SV=2
TRINITY_DN5051_c0_g1_i26	1	TRAF4	MOUSETNF receptor-associated factor 4 OS=Mus musculus OX=10090 GN=Traf4 PE=1 SV=2
TRINITY_DN25042_c0_g2_i1	1	TRAF4	MOUSETNF receptor-associated factor 4 OS=Mus musculus OX=10090 GN=Traf4 PE=1 SV=2
TRINITY_DN37310_c1_g1_i1	1	TRAF4	MOUSETNF receptor-associated factor 4 OS=Mus musculus OX=10090 GN=Traf4 PE=1 SV=2
TRINITY_DN544_c0_g1_i15	1	TRAF4	MOUSETNF receptor-associated factor 4 OS=Mus musculus OX=10090 GN=Traf4 PE=1 SV=2
TRINITY_DN22464_c0_g1_i18	1	TRAF4	MOUSETNF receptor-associated factor 4 OS=Mus musculus OX=10090 GN=Traf4 PE=1 SV=2
TRINITY_DN56798_c0_g1_i1	1	TRAF4	MOUSETNF receptor-associated factor 4 OS=Mus musculus OX=10090 GN=Traf4 PE=1 SV=2
TRINITY_DN19229_c1_g1_i4	1	TRAF4	HUMANTNF receptor-associated factor 4 OS=Homo sapiens OX=9606 GN=TRAF4 PE=1 SV=1
TRINITY_DN6310_c0_g1_i6	1	TRAF4	HUMANTNF receptor-associated factor 4 OS=Homo sapiens OX=9606 GN=TRAF4 PE=1 SV=1
TRINITY_DN3723_c0_g3_i1	1	TRAF4	HUMANTNF receptor-associated factor 4 OS=Homo sapiens OX=9606 GN=TRAF4 PE=1 SV=1
TRINITY_DN18014_c0_g1_i4	1	TRAF4	HUMANTNF receptor-associated factor 4 OS=Homo sapiens OX=9606 GN=TRAF4 PE=1 SV=1
TRINITY_DN3723_c0_g2_i2	1	TRAF4	HUMANTNF receptor-associated factor 4 OS=Homo sapiens OX=9606 GN=TRAF4 PE=1 SV=1
TRINITY_DN13988_c0_g1_i5	1	TRAF4	HUMANTNF receptor-associated factor 4 OS=Homo sapiens OX=9606 GN=TRAF4 PE=1 SV=1
TRINITY_DN57751_c0_g1_i13	1	TRAF4	HUMANTNF receptor-associated factor 4 OS=Homo sapiens OX=9606 GN=TRAF4 PE=1 SV=1
TRINITY_DN22563_c0_g1_i2	1	TRAF4	HUMANTNF receptor-associated factor 4 OS=Homo sapiens OX=9606 GN=TRAF4 PE=1 SV=1
TRINITY_DN42537_c0_g1_i2	1	TRAF4	HUMANTNF receptor-associated factor 4 OS=Homo sapiens OX=9606 GN=TRAF4 PE=1 SV=1
TRINITY_DN6651_c0_g2_i2	1	TRAF4	HUMANTNF receptor-associated factor 4 OS=Homo sapiens OX=9606 GN=TRAF4 PE=1 SV=1
TRINITY_DN23194_c0_g1_i3	1	TRAF4	HUMANTNF receptor-associated factor 4 OS=Homo sapiens OX=9606 GN=TRAF4 PE=1 SV=1
TRINITY_DN1750_c0_g1_i14	1	TRAF4	HUMANTNF receptor-associated factor 4 OS=Homo sapiens OX=9606 GN=TRAF4 PE=1 SV=1
TRINITY_DN22563_c0_g1_i1	1	TRAF4	HUMANTNF receptor-associated factor 4 OS=Homo sapiens OX=9606 GN=TRAF4 PE=1 SV=1
TRINITY_DN22430_c1_g1_i2	1	TRAF4	HUMANTNF receptor-associated factor 4 OS=Homo sapiens OX=9606 GN=TRAF4 PE=1 SV=1
TRINITY_DN18014_c0_g1_i2	1	TRAF4	HUMANTNF receptor-associated factor 4 OS=Homo sapiens OX=9606 GN=TRAF4 PE=1 SV=1
TRINITY_DN15549_c1_g1_i8	1	TRAF4	HUMANTNF receptor-associated factor 4 OS=Homo sapiens OX=9606 GN=TRAF4 PE=1 SV=1
TRINITY_DN33164_c0_g1_i1	1	TRAF4	HUMANTNF receptor-associated factor 4 OS=Homo sapiens OX=9606 GN=TRAF4 PE=1 SV=1
TRINITY_DN5810_c0_g1_i4	1	TRAF4	HUMANTNF receptor-associated factor 4 OS=Homo sapiens OX=9606 GN=TRAF4 PE=1 SV=1
TRINITY_DN15387_c0_g1_i7	1	TRAF4	HUMANTNF receptor-associated factor 4 OS=Homo sapiens OX=9606 GN=TRAF4 PE=1 SV=1
TRINITY_DN57046_c0_g1_i3	1	TRAF4	HUMANTNF receptor-associated factor 4 OS=Homo sapiens OX=9606 GN=TRAF4 PE=1 SV=1
TRINITY_DN28699_c0_g2_i5	1	TRAF4	HUMANTNF receptor-associated factor 4 OS=Homo sapiens OX=9606 GN=TRAF4 PE=1 SV=1
TRINITY_DN38611_c0_g2_i1	1	TRAF4	HUMANTNF receptor-associated factor 4 OS=Homo sapiens OX=9606 GN=TRAF4 PE=1 SV=1
TRINITY_DN11725_c0_g1_i9	1	TRAF4	HUMANTNF receptor-associated factor 4 OS=Homo sapiens OX=9606 GN=TRAF4 PE=1 SV=1
TRINITY_DN7370_c0_g1_i1	1	TRAF4	HUMANTNF receptor-associated factor 4 OS=Homo sapiens OX=9606 GN=TRAF4 PE=1 SV=1
TRINITY_DN44078_c0_g1_i9	1	TRAF3	MOUSETNF receptor-associated factor 3 OS=Mus musculus OX=10090 GN=Traf3 PE=1 SV=2
TRINITY_DN3968_c0_g1_i9	1	TRAF3	MOUSETNF receptor-associated factor 3 OS=Mus musculus OX=10090 GN=Traf3 PE=1 SV=2
TRINITY_DN1093_c0_g1_i14	1	TRAF3	MOUSETNF receptor-associated factor 3 OS=Mus musculus OX=10090 GN=Traf3 PE=1 SV=2
TRINITY_DN16712_c0_g1_i4	1	TRAF3	MOUSETNF receptor-associated factor 3 OS=Mus musculus OX=10090 GN=Traf3 PE=1 SV=2
TRINITY_DN13296_c0_g1_i1	1	TRAF3	MOUSETNF receptor-associated factor 3 OS=Mus musculus OX=10090 GN=Traf3 PE=1 SV=2
TRINITY_DN1093_c0_g1_i23	1	TRAF3	MOUSETNF receptor-associated factor 3 OS=Mus musculus OX=10090 GN=Traf3 PE=1 SV=2
TRINITY_DN10264_c0_g1_i3	1	TRAF3	MOUSETNF receptor-associated factor 3 OS=Mus musculus OX=10090 GN=Traf3 PE=1 SV=2
TRINITY_DN2887_c3_g1_i1	1	TRAF3	MOUSETNF receptor-associated factor 3 OS=Mus musculus OX=10090 GN=Traf3 PE=1 SV=2
TRINITY_DN1093_c0_g1_i1	1	TRAF3	MOUSETNF receptor-associated factor 3 OS=Mus musculus OX=10090 GN=Traf3 PE=1 SV=2
TRINITY_DN1093_c0_g1_i17	1	TRAF3	MOUSETNF receptor-associated factor 3 OS=Mus musculus OX=10090 GN=Traf3 PE=1 SV=2
TRINITY_DN1065_c1_g1_i22	1	TRAF3	MOUSETNF receptor-associated factor 3 OS=Mus musculus OX=10090 GN=Traf3 PE=1 SV=2
TRINITY_DN13095_c0_g1_i19	1	TRAF3	MOUSETNF receptor-associated factor 3 OS=Mus musculus OX=10090 GN=Traf3 PE=1 SV=2
TRINITY_DN909_c0_g3_i1	1	TRAF3	MOUSETNF receptor-associated factor 3 OS=Mus musculus OX=10090 GN=Traf3 PE=1 SV=2
TRINITY_DN2736_c0_g1_i3	1	TRAF3	MOUSETNF receptor-associated factor 3 OS=Mus musculus OX=10090 GN=Traf3 PE=1 SV=2
TRINITY_DN1065_c1_g1_i11	1	TRAF3	MOUSETNF receptor-associated factor 3 OS=Mus musculus OX=10090 GN=Traf3 PE=1 SV=2
TRINITY_DN1463_c0_g1_i18	1	TRAF3	MOUSETNF receptor-associated factor 3 OS=Mus musculus OX=10090 GN=Traf3 PE=1 SV=2
TRINITY_DN544_c0_g1_i14	1	TRAF3	MOUSETNF receptor-associated factor 3 OS=Mus musculus OX=10090 GN=Traf3 PE=1 SV=2
TRINITY_DN909_c0_g2_i3	1	TRAF3	MOUSETNF receptor-associated factor 3 OS=Mus musculus OX=10090 GN=Traf3 PE=1 SV=2
TRINITY_DN10264_c0_g1_i1	1	TRAF3	MOUSETNF receptor-associated factor 3 OS=Mus musculus OX=10090 GN=Traf3 PE=1 SV=2
TRINITY_DN1463_c0_g1_i1	1	TRAF3	MOUSETNF receptor-associated factor 3 OS=Mus musculus OX=10090 GN=Traf3 PE=1 SV=2
TRINITY_DN7826_c0_g2_i9	1	TRAF3	MOUSETNF receptor-associated factor 3 OS=Mus musculus OX=10090 GN=Traf3 PE=1 SV=2
TRINITY_DN1065_c1_g1_i8	1	TRAF3	MOUSETNF receptor-associated factor 3 OS=Mus musculus OX=10090 GN=Traf3 PE=1 SV=2
TRINITY_DN23362_c0_g1_i3	1	TRAF3	MOUSETNF receptor-associated factor 3 OS=Mus musculus OX=10090 GN=Traf3 PE=1 SV=2
TRINITY_DN14999_c0_g1_i5	1	TRAF3	MOUSETNF receptor-associated factor 3 OS=Mus musculus OX=10090 GN=Traf3 PE=1 SV=2
TRINITY_DN10264_c0_g1_i2	1	TRAF3	MOUSETNF receptor-associated factor 3 OS=Mus musculus OX=10090 GN=Traf3 PE=1 SV=2
TRINITY_DN16133_c0_g2_i1	1	TRAF3	MOUSETNF receptor-associated factor 3 OS=Mus musculus OX=10090 GN=Traf3 PE=1 SV=2
TRINITY_DN1180_c5_g1_i1	1	TRAF3	MOUSETNF receptor-associated factor 3 OS=Mus musculus OX=10090 GN=Traf3 PE=1 SV=2
TRINITY_DN1093_c0_g1_i20	1	TRAF3	MOUSETNF receptor-associated factor 3 OS=Mus musculus OX=10090 GN=Traf3 PE=1 SV=2
TRINITY_DN23830_c0_g1_i10	1	TRAF3	MOUSETNF receptor-associated factor 3 OS=Mus musculus OX=10090 GN=Traf3 PE=1 SV=2
TRINITY_DN544_c1_g1_i11	1	TRAF3	MOUSETNF receptor-associated factor 3 OS=Mus musculus OX=10090 GN=Traf3 PE=1 SV=2
TRINITY_DN13505_c0_g1_i1	1	TRAF3	MOUSETNF receptor-associated factor 3 OS=Mus musculus OX=10090 GN=Traf3 PE=1 SV=2
TRINITY_DN37402_c0_g1_i1	1	TRAF3	MOUSETNF receptor-associated factor 3 OS=Mus musculus OX=10090 GN=Traf3 PE=1 SV=2
TRINITY_DN7692_c0_g1_i24	1	TRAF3	HUMANTNF receptor-associated factor 3 OS=Homo sapiens OX=9606 GN=TRAF3 PE=1 SV=2
TRINITY_DN509_c2_g1_i5	1	TRAF3	HUMANTNF receptor-associated factor 3 OS=Homo sapiens OX=9606 GN=TRAF3 PE=1 SV=2
TRINITY_DN7763_c0_g1_i1	1	TRAF3	HUMANTNF receptor-associated factor 3 OS=Homo sapiens OX=9606 GN=TRAF3 PE=1 SV=2
TRINITY_DN910_c0_g1_i5	1	TRAF3	HUMANTNF receptor-associated factor 3 OS=Homo sapiens OX=9606 GN=TRAF3 PE=1 SV=2
TRINITY_DN11725_c0_g1_i6	1	TRAF3	HUMANTNF receptor-associated factor 3 OS=Homo sapiens OX=9606 GN=TRAF3 PE=1 SV=2
TRINITY_DN15720_c0_g1_i16	1	TRAF3	HUMANTNF receptor-associated factor 3 OS=Homo sapiens OX=9606 GN=TRAF3 PE=1 SV=2
TRINITY_DN28745_c0_g1_i4	1	TRAF3	HUMANTNF receptor-associated factor 3 OS=Homo sapiens OX=9606 GN=TRAF3 PE=1 SV=2
TRINITY_DN7692_c0_g1_i18	1	TRAF3	HUMANTNF receptor-associated factor 3 OS=Homo sapiens OX=9606 GN=TRAF3 PE=1 SV=2
TRINITY_DN15720_c0_g1_i2	1	TRAF3	HUMANTNF receptor-associated factor 3 OS=Homo sapiens OX=9606 GN=TRAF3 PE=1 SV=2
TRINITY_DN7692_c0_g1_i21	1	TRAF3	HUMANTNF receptor-associated factor 3 OS=Homo sapiens OX=9606 GN=TRAF3 PE=1 SV=2
TRINITY_DN9331_c0_g1_i1	1	TRAF2	MOUSETNF receptor-associated factor 2 OS=Mus musculus OX=10090 GN=Traf2 PE=1 SV=1
TRINITY_DN544_c0_g1_i16	1	TRAF2	MOUSETNF receptor-associated factor 2 OS=Mus musculus OX=10090 GN=Traf2 PE=1 SV=1
TRINITY_DN14692_c0_g1_i18	1	TRAF2	MOUSETNF receptor-associated factor 2 OS=Mus musculus OX=10090 GN=Traf2 PE=1 SV=1
TRINITY_DN9331_c0_g1_i17	1	TRAF2	MOUSETNF receptor-associated factor 2 OS=Mus musculus OX=10090 GN=Traf2 PE=1 SV=1
TRINITY_DN2887_c1_g1_i29	1	TRAF2	MOUSETNF receptor-associated factor 2 OS=Mus musculus OX=10090 GN=Traf2 PE=1 SV=1
TRINITY_DN45000_c0_g1_i1	1	TRAF2	MOUSETNF receptor-associated factor 2 OS=Mus musculus OX=10090 GN=Traf2 PE=1 SV=1
TRINITY_DN544_c0_g1_i10	1	TRAF2	MOUSETNF receptor-associated factor 2 OS=Mus musculus OX=10090 GN=Traf2 PE=1 SV=1
TRINITY_DN3968_c0_g1_i6	1	TRAF2	MOUSETNF receptor-associated factor 2 OS=Mus musculus OX=10090 GN=Traf2 PE=1 SV=1
TRINITY_DN544_c0_g1_i3	1	TRAF2	MOUSETNF receptor-associated factor 2 OS=Mus musculus OX=10090 GN=Traf2 PE=1 SV=1
TRINITY_DN9331_c0_g1_i8	1	TRAF2	MOUSETNF receptor-associated factor 2 OS=Mus musculus OX=10090 GN=Traf2 PE=1 SV=1
TRINITY_DN14692_c0_g1_i9	1	TRAF2	MOUSETNF receptor-associated factor 2 OS=Mus musculus OX=10090 GN=Traf2 PE=1 SV=1
TRINITY_DN2887_c1_g1_i44	1	TRAF2	MOUSETNF receptor-associated factor 2 OS=Mus musculus OX=10090 GN=Traf2 PE=1 SV=1
TRINITY_DN544_c0_g1_i4	1	TRAF2	MOUSETNF receptor-associated factor 2 OS=Mus musculus OX=10090 GN=Traf2 PE=1 SV=1
TRINITY_DN2887_c1_g1_i31	1	TRAF2	MOUSETNF receptor-associated factor 2 OS=Mus musculus OX=10090 GN=Traf2 PE=1 SV=1
TRINITY_DN14692_c0_g1_i11	1	TRAF2	MOUSETNF receptor-associated factor 2 OS=Mus musculus OX=10090 GN=Traf2 PE=1 SV=1
TRINITY_DN1757_c0_g1_i1	1	TRAF2	MOUSETNF receptor-associated factor 2 OS=Mus musculus OX=10090 GN=Traf2 PE=1 SV=1
TRINITY_DN11762_c0_g1_i9	1	TRAF2	MOUSETNF receptor-associated factor 2 OS=Mus musculus OX=10090 GN=Traf2 PE=1 SV=1
TRINITY_DN2887_c1_g1_i32	1	TRAF2	MOUSETNF receptor-associated factor 2 OS=Mus musculus OX=10090 GN=Traf2 PE=1 SV=1
TRINITY_DN8649_c0_g1_i45	1	TRAF2	MOUSETNF receptor-associated factor 2 OS=Mus musculus OX=10090 GN=Traf2 PE=1 SV=1
TRINITY_DN544_c1_g1_i8	1	TRAF2	MOUSETNF receptor-associated factor 2 OS=Mus musculus OX=10090 GN=Traf2 PE=1 SV=1
TRINITY_DN2887_c1_g1_i40	1	TRAF2	MOUSETNF receptor-associated factor 2 OS=Mus musculus OX=10090 GN=Traf2 PE=1 SV=1
TRINITY_DN140_c0_g1_i84	1	TRAF2	HUMANTNF receptor-associated factor 2 OS=Homo sapiens OX=9606 GN=TRAF2 PE=1 SV=2
TRINITY_DN140_c0_g1_i55	1	TRAF2	HUMANTNF receptor-associated factor 2 OS=Homo sapiens OX=9606 GN=TRAF2 PE=1 SV=2
TRINITY_DN802_c0_g1_i16	1	TRAF2	HUMANTNF receptor-associated factor 2 OS=Homo sapiens OX=9606 GN=TRAF2 PE=1 SV=2
TRINITY_DN802_c0_g1_i2	1	TRAF2	HUMANTNF receptor-associated factor 2 OS=Homo sapiens OX=9606 GN=TRAF2 PE=1 SV=2
TRINITY_DN2887_c1_g1_i18	1	TRAF2	HUMANTNF receptor-associated factor 2 OS=Homo sapiens OX=9606 GN=TRAF2 PE=1 SV=2
TRINITY_DN140_c0_g1_i18	1	TRAF2	HUMANTNF receptor-associated factor 2 OS=Homo sapiens OX=9606 GN=TRAF2 PE=1 SV=2
TRINITY_DN9331_c0_g1_i14	1	TRAF2	HUMANTNF receptor-associated factor 2 OS=Homo sapiens OX=9606 GN=TRAF2 PE=1 SV=2
TRINITY_DN18160_c1_g1_i5	1	TRAF2	HUMANTNF receptor-associated factor 2 OS=Homo sapiens OX=9606 GN=TRAF2 PE=1 SV=2
TRINITY_DN9331_c0_g1_i15	1	TRAF2	HUMANTNF receptor-associated factor 2 OS=Homo sapiens OX=9606 GN=TRAF2 PE=1 SV=2
TRINITY_DN9331_c0_g1_i3	1	TRAF2	HUMANTNF receptor-associated factor 2 OS=Homo sapiens OX=9606 GN=TRAF2 PE=1 SV=2
TRINITY_DN6383_c1_g1_i2	1	TRAF2	HUMANTNF receptor-associated factor 2 OS=Homo sapiens OX=9606 GN=TRAF2 PE=1 SV=2
TRINITY_DN9331_c0_g1_i4	1	TRAF2	HUMANTNF receptor-associated factor 2 OS=Homo sapiens OX=9606 GN=TRAF2 PE=1 SV=2
TRINITY_DN1073_c0_g1_i13	1	TRAF2	HUMANTNF receptor-associated factor 2 OS=Homo sapiens OX=9606 GN=TRAF2 PE=1 SV=2
TRINITY_DN802_c0_g1_i11	1	TRAF2	HUMANTNF receptor-associated factor 2 OS=Homo sapiens OX=9606 GN=TRAF2 PE=1 SV=2
TRINITY_DN9331_c0_g1_i9	1	TRAF2	HUMANTNF receptor-associated factor 2 OS=Homo sapiens OX=9606 GN=TRAF2 PE=1 SV=2
TRINITY_DN1463_c0_g1_i35	1	TRAF1	MOUSETNF receptor-associated factor 1 OS=Mus musculus OX=10090 GN=Traf1 PE=1 SV=2
TRINITY_DN1463_c0_g1_i8	1	TRAF1	MOUSETNF receptor-associated factor 1 OS=Mus musculus OX=10090 GN=Traf1 PE=1 SV=2
TRINITY_DN24572_c0_g2_i1	1	TRAF1	MOUSETNF receptor-associated factor 1 OS=Mus musculus OX=10090 GN=Traf1 PE=1 SV=2
TRINITY_DN3968_c0_g1_i12	1	TRAF1	HUMANTNF receptor-associated factor 1 OS=Homo sapiens OX=9606 GN=TRAF1 PE=1 SV=1
TRINITY_DN9331_c0_g1_i5	1	TRAF1	HUMANTNF receptor-associated factor 1 OS=Homo sapiens OX=9606 GN=TRAF1 PE=1 SV=1
TRINITY_DN10583_c0_g2_i2	1	TRAF1	HUMANTNF receptor-associated factor 1 OS=Homo sapiens OX=9606 GN=TRAF1 PE=1 SV=1
TRINITY_DN447_c0_g1_i10	1	TRAF1	HUMANTNF receptor-associated factor 1 OS=Homo sapiens OX=9606 GN=TRAF1 PE=1 SV=1
TRINITY_DN9331_c0_g1_i10	1	TRAF1	HUMANTNF receptor-associated factor 1 OS=Homo sapiens OX=9606 GN=TRAF1 PE=1 SV=1
TRINITY_DN1963_c1_g1_i19	1	TRAD1	RATTRAF-type zinc finger domain-containing protein 1 OS=Rattus norvegicus OX=10116 GN=Trafd1 PE=1 SV=2
TRINITY_DN738_c0_g1_i41	1	TRAD1	RATTRAF-type zinc finger domain-containing protein 1 OS=Rattus norvegicus OX=10116 GN=Trafd1 PE=1 SV=2
TRINITY_DN27023_c0_g1_i4	1	TRABD	HUMANTraB domain-containing protein OS=Homo sapiens OX=9606 GN=TRABD PE=1 SV=1
TRINITY_DN27023_c0_g1_i2	1	TRABD	HUMANTraB domain-containing protein OS=Homo sapiens OX=9606 GN=TRABD PE=1 SV=1
TRINITY_DN11842_c0_g1_i1	1	TPRKB	RATEKC/KEOPS complex subunit Tprkb OS=Rattus norvegicus OX=10116 GN=Tprkb PE=2 SV=1
TRINITY_DN2401_c0_g1_i11	1	TPRKB	DANREEKC/KEOPS complex subunit TPRKB OS=Danio rerio OX=7955 GN=tprkb PE=2 SV=1
TRINITY_DN3425_c0_g1_i24	1	TPRGL	MOUSETumor protein p63-regulated gene 1-like protein OS=Mus musculus OX=10090 GN=Tprg1l PE=1 SV=1
TRINITY_DN2034_c0_g1_i90	1	TPRA1	HUMANTransmembrane protein adipocyte-associated 1 OS=Homo sapiens OX=9606 GN=TPRA1 PE=1 SV=1
TRINITY_DN2034_c0_g1_i142	1	TPRA1	HUMANTransmembrane protein adipocyte-associated 1 OS=Homo sapiens OX=9606 GN=TPRA1 PE=1 SV=1
TRINITY_DN2034_c0_g1_i86	1	TPRA1	DANRETransmembrane protein adipocyte-associated 1 homolog OS=Danio rerio OX=7955 GN=tpra1 PE=2 SV=1
TRINITY_DN2460_c0_g1_i6	1	TPR	RATNucleoprotein TPR OS=Rattus norvegicus OX=10116 GN=Tpr PE=1 SV=1
TRINITY_DN3589_c0_g2_i1	1	TPPC5	CHICKTrafficking protein particle complex subunit 5 OS=Gallus gallus OX=9031 GN=TRAPPC5 PE=2 SV=1
TRINITY_DN4350_c0_g1_i4	1	TPP2	RATTripeptidyl-peptidase 2 OS=Rattus norvegicus OX=10116 GN=Tpp2 PE=2 SV=3
TRINITY_DN1462_c0_g1_i7	1	TPP1	MOUSETripeptidyl-peptidase 1 OS=Mus musculus OX=10090 GN=Tpp1 PE=1 SV=2
TRINITY_DN1462_c0_g1_i5	1	TPP1	MOUSETripeptidyl-peptidase 1 OS=Mus musculus OX=10090 GN=Tpp1 PE=1 SV=2
TRINITY_DN1462_c0_g1_i13	1	TPP1	MOUSETripeptidyl-peptidase 1 OS=Mus musculus OX=10090 GN=Tpp1 PE=1 SV=2
TRINITY_DN1462_c0_g2_i2	1	TPP1	DANRETripeptidyl-peptidase 1 OS=Danio rerio OX=7955 GN=tpp1 PE=1 SV=2
TRINITY_DN19_c0_g1_i13	1	TPMT	PSEPKThiopurine S-methyltransferase OS=Pseudomonas putida (strain ATCC 47054 / DSM 6125 / NCIMB 11950 / KT2440) OX=160488 GN=tpm PE=3 SV=1
TRINITY_DN19_c0_g1_i3	1	TPMT	PSEPKThiopurine S-methyltransferase OS=Pseudomonas putida (strain ATCC 47054 / DSM 6125 / NCIMB 11950 / KT2440) OX=160488 GN=tpm PE=3 SV=1
TRINITY_DN19_c0_g1_i10	1	TPMT	PSEPKThiopurine S-methyltransferase OS=Pseudomonas putida (strain ATCC 47054 / DSM 6125 / NCIMB 11950 / KT2440) OX=160488 GN=tpm PE=3 SV=1
TRINITY_DN23298_c2_g1_i25	1	TPMT	BOVINThiopurine S-methyltransferase OS=Bos taurus OX=9913 GN=TPMT PE=2 SV=1
TRINITY_DN135500_c0_g1_i1	1	TPM	CORAPTropomyosin OS=Cornu aspersum OX=6535 PE=1 SV=1
TRINITY_DN4295_c0_g1_i42	1	TPK1	HUMANThiamin pyrophosphokinase 1 OS=Homo sapiens OX=9606 GN=TPK1 PE=1 SV=1
TRINITY_DN4295_c0_g1_i6	1	TPK1	HUMANThiamin pyrophosphokinase 1 OS=Homo sapiens OX=9606 GN=TPK1 PE=1 SV=1
TRINITY_DN2444_c0_g1_i5	1	TPIS	CHICKTriosephosphate isomerase OS=Gallus gallus OX=9031 GN=TPI1 PE=1 SV=2
TRINITY_DN50168_c0_g2_i1	1	TPIS	CALS4Triosephosphate isomerase OS=Caldanaerobacter subterraneus subsp. tengcongensis (strain DSM 15242 / JCM 11007 / NBRC 100824 / MB4) OX=273068 GN=tpiA PE=3 SV=1
TRINITY_DN1509_c0_g1_i6	1	TPH1	CHICKTryptophan 5-hydroxylase 1 OS=Gallus gallus OX=9031 GN=TPH1 PE=1 SV=1
TRINITY_DN1474_c0_g1_i61	1	TPD54	RATTumor protein D54 OS=Rattus norvegicus OX=10116 GN=Tpd52l2 PE=1 SV=1
TRINITY_DN1474_c0_g1_i62	1	TPD54	RATTumor protein D54 OS=Rattus norvegicus OX=10116 GN=Tpd52l2 PE=1 SV=1
TRINITY_DN8_c1_g1_i24	1	TPC6B	DANRETrafficking protein particle complex subunit 6b OS=Danio rerio OX=7955 GN=trappc6b PE=2 SV=1
TRINITY_DN8_c1_g1_i60	1	TPC6B	DANRETrafficking protein particle complex subunit 6b OS=Danio rerio OX=7955 GN=trappc6b PE=2 SV=1
TRINITY_DN8_c1_g1_i3	1	TPC6B	DANRETrafficking protein particle complex subunit 6b OS=Danio rerio OX=7955 GN=trappc6b PE=2 SV=1
TRINITY_DN8_c1_g1_i20	1	TPC6B	DANRETrafficking protein particle complex subunit 6b OS=Danio rerio OX=7955 GN=trappc6b PE=2 SV=1
TRINITY_DN8_c1_g1_i19	1	TPC6B	DANRETrafficking protein particle complex subunit 6b OS=Danio rerio OX=7955 GN=trappc6b PE=2 SV=1
TRINITY_DN4298_c0_g1_i6	1	TPC12	MOUSETrafficking protein particle complex subunit 12 OS=Mus musculus OX=10090 GN=Trappc12 PE=1 SV=2
TRINITY_DN4298_c0_g1_i1	1	TPC12	MOUSETrafficking protein particle complex subunit 12 OS=Mus musculus OX=10090 GN=Trappc12 PE=1 SV=2
TRINITY_DN3992_c0_g1_i30	1	TPC1	HUMANTwo pore calcium channel protein 1 OS=Homo sapiens OX=9606 GN=TPCN1 PE=1 SV=3
TRINITY_DN2827_c1_g1_i27	1	TPC1	HUMANTwo pore calcium channel protein 1 OS=Homo sapiens OX=9606 GN=TPCN1 PE=1 SV=3
TRINITY_DN3992_c0_g1_i18	1	TPC1	HUMANTwo pore calcium channel protein 1 OS=Homo sapiens OX=9606 GN=TPCN1 PE=1 SV=3
TRINITY_DN3992_c0_g1_i12	1	TPC1	HUMANTwo pore calcium channel protein 1 OS=Homo sapiens OX=9606 GN=TPCN1 PE=1 SV=3
TRINITY_DN2827_c1_g1_i15	1	TPC1	HUMANTwo pore calcium channel protein 1 OS=Homo sapiens OX=9606 GN=TPCN1 PE=1 SV=3
TRINITY_DN12871_c0_g1_i3	1	TPC	BOVINMitochondrial thiamine pyrophosphate carrier OS=Bos taurus OX=9913 GN=SLC25A19 PE=2 SV=1
TRINITY_DN52_c0_g1_i14	1	TORSO	BOMMOTyrosine-protein kinase receptor torso OS=Bombyx mori OX=7091 GN=tor PE=1 SV=1
TRINITY_DN52_c0_g1_i124	1	TORSO	BOMMOTyrosine-protein kinase receptor torso OS=Bombyx mori OX=7091 GN=tor PE=1 SV=1
TRINITY_DN52_c0_g1_i254	1	TORSO	BOMMOTyrosine-protein kinase receptor torso OS=Bombyx mori OX=7091 GN=tor PE=1 SV=1
TRINITY_DN3051_c0_g1_i39	1	TORSO	BOMMOTyrosine-protein kinase receptor torso OS=Bombyx mori OX=7091 GN=tor PE=1 SV=1
TRINITY_DN6319_c0_g1_i5	1	TOPRS	MOUSEE3 ubiquitin-protein ligase Topors OS=Mus musculus OX=10090 GN=Topors PE=1 SV=1
TRINITY_DN44562_c0_g1_i1	1	TOPB1	MOUSEDNA topoisomerase 2-binding protein 1 OS=Mus musculus OX=10090 GN=Topbp1 PE=1 SV=2
TRINITY_DN44562_c0_g1_i6	1	TOPB1	MOUSEDNA topoisomerase 2-binding protein 1 OS=Mus musculus OX=10090 GN=Topbp1 PE=1 SV=2
TRINITY_DN198_c2_g1_i4	1	TOPB1	MOUSEDNA topoisomerase 2-binding protein 1 OS=Mus musculus OX=10090 GN=Topbp1 PE=1 SV=2
TRINITY_DN9604_c0_g1_i2	1	TOPB1	MOUSEDNA topoisomerase 2-binding protein 1 OS=Mus musculus OX=10090 GN=Topbp1 PE=1 SV=2
TRINITY_DN198_c2_g1_i6	1	TOPB1	MOUSEDNA topoisomerase 2-binding protein 1 OS=Mus musculus OX=10090 GN=Topbp1 PE=1 SV=2
TRINITY_DN9604_c0_g1_i1	1	TOPB1	MOUSEDNA topoisomerase 2-binding protein 1 OS=Mus musculus OX=10090 GN=Topbp1 PE=1 SV=2
TRINITY_DN44562_c0_g1_i10	1	TOPB1	MOUSEDNA topoisomerase 2-binding protein 1 OS=Mus musculus OX=10090 GN=Topbp1 PE=1 SV=2
TRINITY_DN1332_c0_g1_i13	1	TOPB1	HUMANDNA topoisomerase 2-binding protein 1 OS=Homo sapiens OX=9606 GN=TOPBP1 PE=1 SV=3
TRINITY_DN5249_c0_g1_i7	1	TOP3A	HUMANDNA topoisomerase 3-alpha OS=Homo sapiens OX=9606 GN=TOP3A PE=1 SV=1
TRINITY_DN17408_c0_g1_i1	1	TOP1	HUMANDNA topoisomerase 1 OS=Homo sapiens OX=9606 GN=TOP1 PE=1 SV=2
TRINITY_DN17408_c0_g1_i19	1	TOP1	HUMANDNA topoisomerase 1 OS=Homo sapiens OX=9606 GN=TOP1 PE=1 SV=2
TRINITY_DN3100_c0_g1_i28	1	TONSL	DANRETonsoku-like protein OS=Danio rerio OX=7955 GN=tonsl PE=2 SV=1
TRINITY_DN3100_c0_g1_i29	1	TONSL	BOVINTonsoku-like protein OS=Bos taurus OX=9913 GN=TONSL PE=2 SV=1
TRINITY_DN1041_c0_g1_i28	1	TONS	ARATHProtein TONSOKU OS=Arabidopsis thaliana OX=3702 GN=TSK PE=1 SV=2
TRINITY_DN78164_c0_g1_i1	1	TOLR	PSEAETol-Pal system protein TolR OS=Pseudomonas aeruginosa (strain ATCC 15692 / DSM 22644 / CIP 104116 / JCM 14847 / LMG 12228 / 1C / PRS 101 / PAO1) OX=208964 GN=tolR PE=3 SV=1
TRINITY_DN5136_c0_g1_i16	1	TOLIP	MOUSEToll-interacting protein OS=Mus musculus OX=10090 GN=Tollip PE=1 SV=1
TRINITY_DN80712_c0_g1_i1	1	TOLB	SACD2Tol-Pal system protein TolB OS=Saccharophagus degradans (strain 2-40 / ATCC 43961 / DSM 17024) OX=203122 GN=tolB PE=3 SV=1
TRINITY_DN83250_c0_g1_i1	1	TOLB	SACD2Tol-Pal system protein TolB OS=Saccharophagus degradans (strain 2-40 / ATCC 43961 / DSM 17024) OX=203122 GN=tolB PE=3 SV=1
TRINITY_DN2779_c0_g1_i8	1	TOC90	ARATHTranslocase of chloroplast 90, chloroplastic OS=Arabidopsis thaliana OX=3702 GN=TOC90 PE=1 SV=1
TRINITY_DN14821_c1_g1_i2	1	TOC90	ARATHTranslocase of chloroplast 90, chloroplastic OS=Arabidopsis thaliana OX=3702 GN=TOC90 PE=1 SV=1
TRINITY_DN4086_c1_g1_i6	1	TOC34	PEATranslocase of chloroplast 34 OS=Pisum sativum OX=3888 GN=TOC34 PE=1 SV=1
TRINITY_DN4086_c1_g1_i5	1	TOC34	PEATranslocase of chloroplast 34 OS=Pisum sativum OX=3888 GN=TOC34 PE=1 SV=1
TRINITY_DN4086_c1_g1_i2	1	TOC34	PEATranslocase of chloroplast 34 OS=Pisum sativum OX=3888 GN=TOC34 PE=1 SV=1
TRINITY_DN1555_c0_g2_i6	1	TOC34	CHLRETranslocase of chloroplast 34 homolog, chloroplastic OS=Chlamydomonas reinhardtii OX=3055 GN=TOC34 PE=1 SV=1
TRINITY_DN108_c7_g1_i2	1	TOC34	CHLRETranslocase of chloroplast 34 homolog, chloroplastic OS=Chlamydomonas reinhardtii OX=3055 GN=TOC34 PE=1 SV=1
TRINITY_DN1332_c0_g1_i7	1	TOB1B	XENLADNA topoisomerase 2-binding protein 1-B OS=Xenopus laevis OX=8355 GN=topbp1-B PE=2 SV=1
TRINITY_DN1332_c0_g1_i22	1	TOB1A	XENLADNA topoisomerase 2-binding protein 1-A OS=Xenopus laevis OX=8355 GN=topbp1-A PE=1 SV=2
TRINITY_DN11411_c0_g1_i21	1	TNKS2	MOUSEPoly
TRINITY_DN1473_c0_g1_i5	1	TNKS2	MOUSEPoly
TRINITY_DN4848_c0_g1_i24	1	TNKS2	HUMANPoly
TRINITY_DN1473_c0_g1_i1	1	TNKS1	MOUSEPoly
TRINITY_DN280_c0_g1_i26	1	TNI3K	MOUSESerine/threonine-protein kinase TNNI3K OS=Mus musculus OX=10090 GN=Tnni3k PE=2 SV=4
TRINITY_DN11111_c0_g1_i15	1	TNI3K	MOUSESerine/threonine-protein kinase TNNI3K OS=Mus musculus OX=10090 GN=Tnni3k PE=2 SV=4
TRINITY_DN14665_c0_g1_i4	1	TNI3K	MOUSESerine/threonine-protein kinase TNNI3K OS=Mus musculus OX=10090 GN=Tnni3k PE=2 SV=4
TRINITY_DN31830_c0_g1_i1	1	TNI3K	MOUSESerine/threonine-protein kinase TNNI3K OS=Mus musculus OX=10090 GN=Tnni3k PE=2 SV=4
TRINITY_DN10975_c0_g1_i31	1	TNG2	BOVINTransport and Golgi organization protein 2 homolog OS=Bos taurus OX=9913 GN=TANGO2 PE=2 SV=1
TRINITY_DN10975_c0_g1_i28	1	TNG2	BOVINTransport and Golgi organization protein 2 homolog OS=Bos taurus OX=9913 GN=TANGO2 PE=2 SV=1
TRINITY_DN9437_c0_g1_i1	1	TMX1	MOUSEThioredoxin-related transmembrane protein 1 OS=Mus musculus OX=10090 GN=Tmx1 PE=1 SV=1
TRINITY_DN9437_c0_g1_i3	1	TMX1	MOUSEThioredoxin-related transmembrane protein 1 OS=Mus musculus OX=10090 GN=Tmx1 PE=1 SV=1
TRINITY_DN1895_c0_g1_i193	1	TMX1	BOVINThioredoxin-related transmembrane protein 1 OS=Bos taurus OX=9913 GN=TMX1 PE=2 SV=1
TRINITY_DN3663_c0_g1_i1	1	TMTC3	MOUSEProtein O-mannosyl-transferase TMTC3 OS=Mus musculus OX=10090 GN=Tmtc3 PE=1 SV=2
TRINITY_DN10798_c0_g1_i6	1	TMPPE	DANRETransmembrane protein with metallophosphoesterase domain OS=Danio rerio OX=7955 GN=tmppe PE=2 SV=1
TRINITY_DN10798_c0_g1_i3	1	TMPPE	DANRETransmembrane protein with metallophosphoesterase domain OS=Danio rerio OX=7955 GN=tmppe PE=2 SV=1
TRINITY_DN10041_c0_g1_i1	1	TMM70	BOVINTransmembrane protein 70, mitochondrial OS=Bos taurus OX=9913 GN=TMEM70 PE=2 SV=1
TRINITY_DN1626_c0_g1_i53	1	TMM33	HUMANTransmembrane protein 33 OS=Homo sapiens OX=9606 GN=TMEM33 PE=1 SV=2
TRINITY_DN1626_c0_g1_i18	1	TMM33	HUMANTransmembrane protein 33 OS=Homo sapiens OX=9606 GN=TMEM33 PE=1 SV=2
TRINITY_DN8732_c0_g1_i7	1	TMF1	HUMANTATA element modulatory factor OS=Homo sapiens OX=9606 GN=TMF1 PE=1 SV=2
TRINITY_DN1050_c0_g1_i18	1	TMED7	HUMANTransmembrane emp24 domain-containing protein 7 OS=Homo sapiens OX=9606 GN=TMED7 PE=1 SV=2
TRINITY_DN1050_c0_g1_i20	1	TMED7	HUMANTransmembrane emp24 domain-containing protein 7 OS=Homo sapiens OX=9606 GN=TMED7 PE=1 SV=2
TRINITY_DN16028_c0_g1_i10	1	TMED2	RATTransmembrane emp24 domain-containing protein 2 OS=Rattus norvegicus OX=10116 GN=Tmed2 PE=1 SV=1
TRINITY_DN2870_c0_g1_i4	1	TMED1	XENTRTransmembrane emp24 domain-containing protein 1 OS=Xenopus tropicalis OX=8364 GN=tmed1 PE=2 SV=1
TRINITY_DN53853_c0_g1_i2	1	TMCO3	MOUSETransmembrane and coiled-coil domain-containing protein 3 OS=Mus musculus OX=10090 GN=Tmco3 PE=2 SV=1
TRINITY_DN234_c2_g1_i9	1	TMCO3	MOUSETransmembrane and coiled-coil domain-containing protein 3 OS=Mus musculus OX=10090 GN=Tmco3 PE=2 SV=1
TRINITY_DN5395_c0_g1_i1	1	TMCO1	BOVINCalcium load-activated calcium channel OS=Bos taurus OX=9913 GN=TMCO1 PE=2 SV=1
TRINITY_DN3728_c0_g1_i33	1	TMC7	CHICKTransmembrane channel-like protein 7 OS=Gallus gallus OX=9031 GN=Tmc7 PE=2 SV=1
TRINITY_DN115766_c0_g1_i1	1	TMBP	NOSS1Monocarboxylate 2-oxoacid-binding periplasmic protein all3028 OS=Nostoc sp. (strain PCC 7120 / SAG 25.82 / UTEX 2576) OX=103690 GN=all3028 PE=1 SV=1
TRINITY_DN929_c0_g1_i12	1	TM9S1	BOVINTransmembrane 9 superfamily member 1 OS=Bos taurus OX=9913 GN=TM9SF1 PE=2 SV=1
TRINITY_DN929_c0_g1_i28	1	TM9S1	BOVINTransmembrane 9 superfamily member 1 OS=Bos taurus OX=9913 GN=TM9SF1 PE=2 SV=1
TRINITY_DN929_c0_g1_i42	1	TM9S1	BOVINTransmembrane 9 superfamily member 1 OS=Bos taurus OX=9913 GN=TM9SF1 PE=2 SV=1
TRINITY_DN15588_c1_g1_i2	1	TM41A	MOUSETransmembrane protein 41A OS=Mus musculus OX=10090 GN=Tmem41a PE=2 SV=1
TRINITY_DN11117_c0_g1_i4	1	TM35B	HUMANTransmembrane protein 35B OS=Homo sapiens OX=9606 GN=TMEM35B PE=1 SV=1
TRINITY_DN4063_c0_g1_i60	1	TM1L2	XENLATOM1-like protein 2 OS=Xenopus laevis OX=8355 GN=tom1l2 PE=2 SV=1
TRINITY_DN1488_c0_g1_i16	1	TM175	DANREEndosomal/lysosomal potassium channel TMEM175 OS=Danio rerio OX=7955 GN=tmem175 PE=3 SV=1
TRINITY_DN14881_c0_g2_i1	1	TM175	CHICKEndosomal/lysosomal potassium channel TMEM175 OS=Gallus gallus OX=9031 GN=TMEM175 PE=2 SV=2
TRINITY_DN3275_c0_g1_i2	1	TM165	MOUSETransmembrane protein 165 OS=Mus musculus OX=10090 GN=Tmem165 PE=1 SV=2
TRINITY_DN3275_c0_g1_i17	1	TM165	MOUSETransmembrane protein 165 OS=Mus musculus OX=10090 GN=Tmem165 PE=1 SV=2
TRINITY_DN73_c1_g2_i1	1	TM147	XENLATransmembrane protein 147 OS=Xenopus laevis OX=8355 GN=tmem147 PE=2 SV=1
TRINITY_DN73_c1_g2_i12	1	TM147	XENLATransmembrane protein 147 OS=Xenopus laevis OX=8355 GN=tmem147 PE=2 SV=1
TRINITY_DN73_c1_g2_i17	1	TM147	XENLATransmembrane protein 147 OS=Xenopus laevis OX=8355 GN=tmem147 PE=2 SV=1
TRINITY_DN10923_c0_g1_i11	1	TM144	MOUSETransmembrane protein 144 OS=Mus musculus OX=10090 GN=Tmem144 PE=2 SV=1
TRINITY_DN1337_c1_g1_i95	1	TM135	XENLATransmembrane protein 135 OS=Xenopus laevis OX=8355 GN=tmem135 PE=2 SV=1
TRINITY_DN1782_c0_g1_i81	1	TM129	CHICKTransmembrane protein 129 OS=Gallus gallus OX=9031 GN=TMEM129 PE=2 SV=1
TRINITY_DN7775_c0_g1_i17	1	TM128	MOUSETransmembrane protein 128 OS=Mus musculus OX=10090 GN=Tmem128 PE=1 SV=2
TRINITY_DN4168_c0_g1_i9	1	TM116	DANRETransmembrane protein 116 OS=Danio rerio OX=7955 GN=tmem116 PE=2 SV=1
TRINITY_DN3140_c0_g1_i14	1	TM116	DANRETransmembrane protein 116 OS=Danio rerio OX=7955 GN=tmem116 PE=2 SV=1
TRINITY_DN3140_c0_g1_i4	1	TM116	DANRETransmembrane protein 116 OS=Danio rerio OX=7955 GN=tmem116 PE=2 SV=1
TRINITY_DN5325_c0_g1_i1	1	TM115	MOUSETransmembrane protein 115 OS=Mus musculus OX=10090 GN=Tmem115 PE=1 SV=1
TRINITY_DN2721_c0_g1_i32	1	TM10A	RATtRNA methyltransferase 10 homolog A OS=Rattus norvegicus OX=10116 GN=Trmt10a PE=1 SV=1
TRINITY_DN1097_c0_g1_i5	1	TM104	CHICKTransmembrane protein 104 OS=Gallus gallus OX=9031 GN=TMEM104 PE=2 SV=1
TRINITY_DN1097_c0_g1_i4	1	TM104	CHICKTransmembrane protein 104 OS=Gallus gallus OX=9031 GN=TMEM104 PE=2 SV=1
TRINITY_DN8364_c0_g1_i13	1	TLRN1	MOUSETalin rod domain-containing protein 1 OS=Mus musculus OX=10090 GN=Tlnrd1 PE=1 SV=1
TRINITY_DN68404_c0_g1_i1	1	TLR8	MOUSEToll-like receptor 8 OS=Mus musculus OX=10090 GN=Tlr8 PE=1 SV=2
TRINITY_DN8715_c0_g1_i7	1	TLN1	MOUSETalin-1 OS=Mus musculus OX=10090 GN=Tln1 PE=1 SV=2
TRINITY_DN2941_c0_g1_i21	1	TLN1	CHICKTalin-1 OS=Gallus gallus OX=9031 GN=TLN1 PE=1 SV=2
TRINITY_DN658_c0_g1_i13	1	TLN1	CHICKTalin-1 OS=Gallus gallus OX=9031 GN=TLN1 PE=1 SV=2
TRINITY_DN721_c0_g1_i36	1	TLL2	XENLATolloid-like protein 2 OS=Xenopus laevis OX=8355 GN=tll2 PE=2 SV=1
TRINITY_DN721_c0_g1_i33	1	TLL2	XENLATolloid-like protein 2 OS=Xenopus laevis OX=8355 GN=tll2 PE=2 SV=1
TRINITY_DN39961_c1_g1_i2	1	TLL2	MOUSETolloid-like protein 2 OS=Mus musculus OX=10090 GN=Tll2 PE=1 SV=1
TRINITY_DN3976_c0_g1_i16	1	TLL2	MOUSETolloid-like protein 2 OS=Mus musculus OX=10090 GN=Tll2 PE=1 SV=1
TRINITY_DN10172_c0_g2_i1	1	TLL2	MOUSETolloid-like protein 2 OS=Mus musculus OX=10090 GN=Tll2 PE=1 SV=1
TRINITY_DN282_c0_g1_i1	1	TLL1	XENLATolloid-like protein 1 OS=Xenopus laevis OX=8355 GN=tll1 PE=1 SV=1
TRINITY_DN282_c0_g1_i3	1	TLL1	XENLATolloid-like protein 1 OS=Xenopus laevis OX=8355 GN=tll1 PE=1 SV=1
TRINITY_DN282_c0_g1_i13	1	TLL1	XENLATolloid-like protein 1 OS=Xenopus laevis OX=8355 GN=tll1 PE=1 SV=1
TRINITY_DN282_c0_g1_i8	1	TLL1	XENLATolloid-like protein 1 OS=Xenopus laevis OX=8355 GN=tll1 PE=1 SV=1
TRINITY_DN282_c0_g1_i11	1	TLL1	XENLATolloid-like protein 1 OS=Xenopus laevis OX=8355 GN=tll1 PE=1 SV=1
TRINITY_DN282_c0_g1_i6	1	TLL1	XENLATolloid-like protein 1 OS=Xenopus laevis OX=8355 GN=tll1 PE=1 SV=1
TRINITY_DN3976_c0_g1_i40	1	TLL1	MOUSETolloid-like protein 1 OS=Mus musculus OX=10090 GN=Tll1 PE=1 SV=1
TRINITY_DN3976_c0_g1_i19	1	TLL1	HUMANTolloid-like protein 1 OS=Homo sapiens OX=9606 GN=TLL1 PE=1 SV=1
TRINITY_DN46602_c0_g1_i1	1	TLL1	DANREDorsal-ventral patterning tolloid-like protein 1 OS=Danio rerio OX=7955 GN=tll1 PE=2 SV=1
TRINITY_DN745_c0_g1_i39	1	TLK2	DANRESerine/threonine-protein kinase tousled-like 2 OS=Danio rerio OX=7955 GN=tlk2 PE=2 SV=2
TRINITY_DN745_c0_g1_i48	1	TLK2	DANRESerine/threonine-protein kinase tousled-like 2 OS=Danio rerio OX=7955 GN=tlk2 PE=2 SV=2
TRINITY_DN29156_c0_g1_i4	1	TLH1	SCHPOATP-dependent DNA helicase tlh1 (Fragment) OS=Schizosaccharomyces pombe (strain 972 / ATCC 24843) OX=284812 GN=tlh1 PE=3 SV=1
TRINITY_DN789_c0_g1_i57	1	TLH1	SCHPOATP-dependent DNA helicase tlh1 (Fragment) OS=Schizosaccharomyces pombe (strain 972 / ATCC 24843) OX=284812 GN=tlh1 PE=3 SV=1
TRINITY_DN17648_c1_g1_i7	1	TLH1	SCHPOATP-dependent DNA helicase tlh1 (Fragment) OS=Schizosaccharomyces pombe (strain 972 / ATCC 24843) OX=284812 GN=tlh1 PE=3 SV=1
TRINITY_DN17648_c1_g1_i55	1	TLH1	SCHPOATP-dependent DNA helicase tlh1 (Fragment) OS=Schizosaccharomyces pombe (strain 972 / ATCC 24843) OX=284812 GN=tlh1 PE=3 SV=1
TRINITY_DN789_c0_g1_i6	1	TLH1	SCHPOATP-dependent DNA helicase tlh1 (Fragment) OS=Schizosaccharomyces pombe (strain 972 / ATCC 24843) OX=284812 GN=tlh1 PE=3 SV=1
TRINITY_DN1248_c0_g1_i3	1	TLE3	RATTransducin-like enhancer protein 3 OS=Rattus norvegicus OX=10116 GN=Tle3 PE=1 SV=1
TRINITY_DN14463_c0_g1_i1	1	TLD	DROMEDorsal-ventral patterning protein tolloid OS=Drosophila melanogaster OX=7227 GN=tld PE=2 SV=2
TRINITY_DN36790_c1_g1_i2	1	TLD	DROMEDorsal-ventral patterning protein tolloid OS=Drosophila melanogaster OX=7227 GN=tld PE=2 SV=2
TRINITY_DN14463_c0_g1_i2	1	TLD	DROMEDorsal-ventral patterning protein tolloid OS=Drosophila melanogaster OX=7227 GN=tld PE=2 SV=2
TRINITY_DN10636_c0_g1_i7	1	TLD	DROMEDorsal-ventral patterning protein tolloid OS=Drosophila melanogaster OX=7227 GN=tld PE=2 SV=2
TRINITY_DN3502_c0_g1_i1	1	TLD	DROMEDorsal-ventral patterning protein tolloid OS=Drosophila melanogaster OX=7227 GN=tld PE=2 SV=2
TRINITY_DN7399_c0_g1_i1	1	TLD	DROMEDorsal-ventral patterning protein tolloid OS=Drosophila melanogaster OX=7227 GN=tld PE=2 SV=2
TRINITY_DN41384_c0_g1_i5	1	TKTL2	MOUSETransketolase-like protein 2 OS=Mus musculus OX=10090 GN=Tktl2 PE=1 SV=1
TRINITY_DN45744_c0_g1_i1	1	TKTC	SOLTUTransketolase, chloroplastic OS=Solanum tuberosum OX=4113 PE=2 SV=1
TRINITY_DN53962_c1_g1_i1	1	TKTC	CRAPLTransketolase, chloroplastic (Fragment) OS=Craterostigma plantagineum OX=4153 GN=TKT3 PE=1 SV=1
TRINITY_DN139417_c0_g1_i1	1	TKT1	VIBVUTransketolase 1 OS=Vibrio vulnificus (strain CMCP6) OX=216895 GN=tkt1 PE=3 SV=2
TRINITY_DN121157_c0_g1_i1	1	TKT	NOSS1Transketolase OS=Nostoc sp. (strain PCC 7120 / SAG 25.82 / UTEX 2576) OX=103690 GN=tkt PE=1 SV=1
TRINITY_DN142140_c0_g1_i1	1	TKT	NOSS1Transketolase OS=Nostoc sp. (strain PCC 7120 / SAG 25.82 / UTEX 2576) OX=103690 GN=tkt PE=1 SV=1
TRINITY_DN46130_c2_g1_i1	1	TKT	NOSS1Transketolase OS=Nostoc sp. (strain PCC 7120 / SAG 25.82 / UTEX 2576) OX=103690 GN=tkt PE=1 SV=1
TRINITY_DN59456_c1_g1_i1	1	TKT	NOSS1Transketolase OS=Nostoc sp. (strain PCC 7120 / SAG 25.82 / UTEX 2576) OX=103690 GN=tkt PE=1 SV=1
TRINITY_DN46130_c0_g1_i1	1	TKT	NOSS1Transketolase OS=Nostoc sp. (strain PCC 7120 / SAG 25.82 / UTEX 2576) OX=103690 GN=tkt PE=1 SV=1
TRINITY_DN490_c1_g1_i9	1	TKPR2	ARATHTetraketide alpha-pyrone reductase 2 OS=Arabidopsis thaliana OX=3702 GN=TKPR2 PE=1 SV=1
TRINITY_DN1916_c0_g1_i7	1	TKFC	MOUSETriokinase/FMN cyclase OS=Mus musculus OX=10090 GN=Tkfc PE=1 SV=1
TRINITY_DN40096_c0_g1_i1	1	TITIN	MOUSETitin OS=Mus musculus OX=10090 GN=Ttn PE=1 SV=1
TRINITY_DN1743_c0_g1_i10	1	TITIN	HUMANTitin OS=Homo sapiens OX=9606 GN=TTN PE=1 SV=4
TRINITY_DN25568_c0_g2_i2	1	TITIN	HUMANTitin OS=Homo sapiens OX=9606 GN=TTN PE=1 SV=4
TRINITY_DN135927_c0_g1_i1	1	TITIN	HUMANTitin OS=Homo sapiens OX=9606 GN=TTN PE=1 SV=4
TRINITY_DN1738_c0_g1_i67	1	TITIN	HUMANTitin OS=Homo sapiens OX=9606 GN=TTN PE=1 SV=4
TRINITY_DN665_c0_g1_i6	1	TITIN	HUMANTitin OS=Homo sapiens OX=9606 GN=TTN PE=1 SV=4
TRINITY_DN16796_c0_g1_i3	1	TITIN	HUMANTitin OS=Homo sapiens OX=9606 GN=TTN PE=1 SV=4
TRINITY_DN136308_c0_g1_i1	1	TITIN	DROMETitin OS=Drosophila melanogaster OX=7227 GN=sls PE=1 SV=3
TRINITY_DN1164_c3_g1_i4	1	TIR	BRADITIR-only protein OS=Brachypodium distachyon OX=15368 GN=BRADI
TRINITY_DN1164_c3_g1_i2	1	TIR	BRADITIR-only protein OS=Brachypodium distachyon OX=15368 GN=BRADI
TRINITY_DN10767_c0_g1_i54	1	TIPRL	MOUSETIP41-like protein OS=Mus musculus OX=10090 GN=Tiprl PE=1 SV=1
TRINITY_DN10767_c0_g1_i67	1	TIPRL	MOUSETIP41-like protein OS=Mus musculus OX=10090 GN=Tiprl PE=1 SV=1
TRINITY_DN18222_c0_g1_i2	1	TIPIN	CHICKTIMELESS-interacting protein OS=Gallus gallus OX=9031 GN=TIPIN PE=2 SV=1
TRINITY_DN8704_c0_g1_i68	1	TIP	RATT-cell immunomodulatory protein OS=Rattus norvegicus OX=10116 GN=Itfg1 PE=1 SV=1
TRINITY_DN57737_c0_g1_i10	1	TIM9	DANREMitochondrial import inner membrane translocase subunit Tim9 OS=Danio rerio OX=7955 GN=timm9 PE=3 SV=2
TRINITY_DN7895_c0_g1_i6	1	TIM22	RATMitochondrial import inner membrane translocase subunit Tim22 OS=Rattus norvegicus OX=10116 GN=Timm22 PE=2 SV=2
TRINITY_DN8018_c0_g1_i9	1	TIM21	XENLAMitochondrial import inner membrane translocase subunit Tim21 OS=Xenopus laevis OX=8355 GN=timm21 PE=2 SV=1
TRINITY_DN10709_c0_g1_i11	1	TILS	ORITItRNA(Ile)-lysidine synthase OS=Orientia tsutsugamushi (strain Ikeda) OX=334380 GN=tilS PE=3 SV=1
TRINITY_DN10709_c0_g1_i3	1	TILS	GLUOXtRNA(Ile)-lysidine synthase OS=Gluconobacter oxydans (strain 621H) OX=290633 GN=tilS PE=3 SV=1
TRINITY_DN10121_c0_g1_i23	1	TIKI1	AMPQEMetalloprotease TIKI homolog OS=Amphimedon queenslandica OX=400682 PE=2 SV=2
TRINITY_DN10121_c0_g1_i56	1	TIKI1	AMPQEMetalloprotease TIKI homolog OS=Amphimedon queenslandica OX=400682 PE=2 SV=2
TRINITY_DN3906_c0_g1_i65	1	TIGD6	HUMANTigger transposable element-derived protein 6 OS=Homo sapiens OX=9606 GN=TIGD6 PE=2 SV=2
TRINITY_DN20589_c0_g1_i4	1	TIGD6	HUMANTigger transposable element-derived protein 6 OS=Homo sapiens OX=9606 GN=TIGD6 PE=2 SV=2
TRINITY_DN10821_c1_g3_i3	1	TIGD6	HUMANTigger transposable element-derived protein 6 OS=Homo sapiens OX=9606 GN=TIGD6 PE=2 SV=2
TRINITY_DN11200_c0_g5_i2	1	TIGD6	HUMANTigger transposable element-derived protein 6 OS=Homo sapiens OX=9606 GN=TIGD6 PE=2 SV=2
TRINITY_DN3906_c0_g1_i17	1	TIGD6	HUMANTigger transposable element-derived protein 6 OS=Homo sapiens OX=9606 GN=TIGD6 PE=2 SV=2
TRINITY_DN14763_c1_g1_i2	1	TIGD6	HUMANTigger transposable element-derived protein 6 OS=Homo sapiens OX=9606 GN=TIGD6 PE=2 SV=2
TRINITY_DN1942_c0_g1_i34	1	TIGD6	HUMANTigger transposable element-derived protein 6 OS=Homo sapiens OX=9606 GN=TIGD6 PE=2 SV=2
TRINITY_DN3906_c0_g1_i16	1	TIGD6	HUMANTigger transposable element-derived protein 6 OS=Homo sapiens OX=9606 GN=TIGD6 PE=2 SV=2
TRINITY_DN1942_c0_g1_i105	1	TIGD2	HUMANTigger transposable element-derived protein 2 OS=Homo sapiens OX=9606 GN=TIGD2 PE=3 SV=1
TRINITY_DN1942_c0_g1_i28	1	TIGD2	HUMANTigger transposable element-derived protein 2 OS=Homo sapiens OX=9606 GN=TIGD2 PE=3 SV=1
TRINITY_DN2956_c0_g1_i28	1	TIGD1	HUMANTigger transposable element-derived protein 1 OS=Homo sapiens OX=9606 GN=TIGD1 PE=1 SV=1
TRINITY_DN2956_c0_g1_i20	1	TIGD1	HUMANTigger transposable element-derived protein 1 OS=Homo sapiens OX=9606 GN=TIGD1 PE=1 SV=1
TRINITY_DN2956_c0_g1_i29	1	TIGD1	HUMANTigger transposable element-derived protein 1 OS=Homo sapiens OX=9606 GN=TIGD1 PE=1 SV=1
TRINITY_DN83085_c0_g1_i1	1	TIG	SYNS3Trigger factor OS=Synechococcus sp. (strain CC9311) OX=64471 GN=tig PE=3 SV=1
TRINITY_DN102870_c0_g1_i1	1	TIG	SYNPWTrigger factor OS=Synechococcus sp. (strain WH7803) OX=32051 GN=tig PE=3 SV=1
TRINITY_DN71152_c0_g1_i1	1	TIG	STRAWTrigger factor OS=Streptomyces avermitilis (strain ATCC 31267 / DSM 46492 / JCM 5070 / NBRC 14893 / NCIMB 12804 / NRRL 8165 / MA-4680) OX=227882 GN=tig PE=3 SV=1
TRINITY_DN64111_c0_g1_i1	1	TIG	PSEFSTrigger factor OS=Pseudomonas fluorescens (strain SBW25) OX=216595 GN=tig PE=3 SV=1
TRINITY_DN17470_c0_g1_i6	1	TIF1B	MOUSETranscription intermediary factor 1-beta OS=Mus musculus OX=10090 GN=Trim28 PE=1 SV=3
TRINITY_DN11403_c0_g1_i6	1	TIF1B	HUMANTranscription intermediary factor 1-beta OS=Homo sapiens OX=9606 GN=TRIM28 PE=1 SV=5
TRINITY_DN4831_c1_g1_i12	1	TIF1B	HUMANTranscription intermediary factor 1-beta OS=Homo sapiens OX=9606 GN=TRIM28 PE=1 SV=5
TRINITY_DN19125_c0_g1_i5	1	TIF1A	HUMANTranscription intermediary factor 1-alpha OS=Homo sapiens OX=9606 GN=TRIM24 PE=1 SV=3
TRINITY_DN19125_c0_g1_i6	1	TIF1A	HUMANTranscription intermediary factor 1-alpha OS=Homo sapiens OX=9606 GN=TRIM24 PE=1 SV=3
TRINITY_DN21971_c0_g2_i4	1	TIF1A	HUMANTranscription intermediary factor 1-alpha OS=Homo sapiens OX=9606 GN=TRIM24 PE=1 SV=3
TRINITY_DN19125_c0_g1_i9	1	TIF1A	HUMANTranscription intermediary factor 1-alpha OS=Homo sapiens OX=9606 GN=TRIM24 PE=1 SV=3
TRINITY_DN21971_c0_g2_i1	1	TIF1A	HUMANTranscription intermediary factor 1-alpha OS=Homo sapiens OX=9606 GN=TRIM24 PE=1 SV=3
TRINITY_DN35355_c0_g1_i10	1	TIF1A	HUMANTranscription intermediary factor 1-alpha OS=Homo sapiens OX=9606 GN=TRIM24 PE=1 SV=3
TRINITY_DN35355_c0_g1_i2	1	TIF1A	HUMANTranscription intermediary factor 1-alpha OS=Homo sapiens OX=9606 GN=TRIM24 PE=1 SV=3
TRINITY_DN18333_c0_g1_i19	1	TIF1A	HUMANTranscription intermediary factor 1-alpha OS=Homo sapiens OX=9606 GN=TRIM24 PE=1 SV=3
TRINITY_DN18333_c0_g1_i8	1	TIF1A	HUMANTranscription intermediary factor 1-alpha OS=Homo sapiens OX=9606 GN=TRIM24 PE=1 SV=3
TRINITY_DN26213_c0_g1_i1	1	TICRR	MOUSETreslin OS=Mus musculus OX=10090 GN=Ticrr PE=1 SV=2
TRINITY_DN2384_c0_g1_i13	1	TI50C	DROMEMitochondrial import inner membrane translocase subunit TIM50-C OS=Drosophila melanogaster OX=7227 GN=ttm50 PE=2 SV=2
TRINITY_DN8979_c0_g2_i10	1	TI16A	XENLAMitochondrial import inner membrane translocase subunit tim16-A OS=Xenopus laevis OX=8355 GN=pam16-a PE=2 SV=1
TRINITY_DN17247_c0_g1_i4	1	THUM1	BOVINTHUMP domain-containing protein 1 OS=Bos taurus OX=9913 GN=THUMPD1 PE=2 SV=1
TRINITY_DN17247_c0_g1_i6	1	THUM1	BOVINTHUMP domain-containing protein 1 OS=Bos taurus OX=9913 GN=THUMPD1 PE=2 SV=1
TRINITY_DN52234_c0_g1_i3	1	THTR	MOUSEThiosulfate sulfurtransferase OS=Mus musculus OX=10090 GN=Tst PE=1 SV=3
TRINITY_DN1653_c0_g1_i152	1	THSD4	HUMANThrombospondin type-1 domain-containing protein 4 OS=Homo sapiens OX=9606 GN=THSD4 PE=2 SV=2
TRINITY_DN1653_c0_g1_i6	1	THSD4	HUMANThrombospondin type-1 domain-containing protein 4 OS=Homo sapiens OX=9606 GN=THSD4 PE=2 SV=2
TRINITY_DN27491_c1_g2_i5	1	THOC5	XENTRTHO complex subunit 5 homolog OS=Xenopus tropicalis OX=8364 GN=thoc5 PE=2 SV=1
TRINITY_DN1118_c0_g1_i7	1	THOC4	BOVINTHO complex subunit 4 OS=Bos taurus OX=9913 GN=ALYREF PE=2 SV=1
TRINITY_DN1993_c0_g1_i11	1	THOC3	HUMANTHO complex subunit 3 OS=Homo sapiens OX=9606 GN=THOC3 PE=1 SV=1
TRINITY_DN7617_c0_g1_i13	1	THOC2	MOUSETHO complex subunit 2 OS=Mus musculus OX=10090 GN=Thoc2 PE=1 SV=1
TRINITY_DN7617_c0_g1_i61	1	THOC2	MOUSETHO complex subunit 2 OS=Mus musculus OX=10090 GN=Thoc2 PE=1 SV=1
TRINITY_DN7617_c0_g1_i70	1	THOC2	DASNOTHO complex subunit 2 OS=Dasypus novemcinctus OX=9361 GN=THOC2 PE=3 SV=1
TRINITY_DN6086_c0_g1_i18	1	THIOM	MOUSEThioredoxin, mitochondrial OS=Mus musculus OX=10090 GN=Txn2 PE=1 SV=1
TRINITY_DN136457_c0_g1_i1	1	THIO1	NOSS1Thioredoxin 1 OS=Nostoc sp. (strain PCC 7120 / SAG 25.82 / UTEX 2576) OX=103690 GN=trxA PE=3 SV=2
TRINITY_DN15853_c0_g1_i7	1	THIO	GEOCYThioredoxin OS=Geodia cydonium OX=6047 GN=THIO PE=3 SV=1
TRINITY_DN15853_c0_g1_i2	1	THIO	GEOCYThioredoxin OS=Geodia cydonium OX=6047 GN=THIO PE=3 SV=1
TRINITY_DN60279_c0_g1_i1	1	THIO	ECO57Thioredoxin 1 OS=Escherichia coli O157:H7 OX=83334 GN=trxA PE=1 SV=2
TRINITY_DN2651_c0_g1_i7	1	THIL	DANREAcetyl-CoA acetyltransferase, mitochondrial OS=Danio rerio OX=7955 GN=acat1 PE=2 SV=1
TRINITY_DN41011_c0_g1_i1	1	THIC	SYNS3Phosphomethylpyrimidine synthase OS=Synechococcus sp. (strain CC9311) OX=64471 GN=thiC PE=3 SV=1
TRINITY_DN1066_c0_g2_i58	1	THIC	RATAcetyl-CoA acetyltransferase, cytosolic OS=Rattus norvegicus OX=10116 GN=Acat2 PE=1 SV=1
TRINITY_DN1066_c0_g2_i35	1	THIC	MOUSEAcetyl-CoA acetyltransferase, cytosolic OS=Mus musculus OX=10090 GN=Acat2 PE=1 SV=2
TRINITY_DN8973_c0_g1_i4	1	THG1	HUMANProbable tRNA(His) guanylyltransferase OS=Homo sapiens OX=9606 GN=THG1L PE=1 SV=2
TRINITY_DN2183_c0_g1_i6	1	THA2	ARATHProbable low-specificity L-threonine aldolase 2 OS=Arabidopsis thaliana OX=3702 GN=THA2 PE=1 SV=1
TRINITY_DN27020_c0_g1_i1	1	TGTP1	MOUSET-cell-specific guanine nucleotide triphosphate-binding protein 1 OS=Mus musculus OX=10090 GN=Tgtp1 PE=1 SV=1
TRINITY_DN33138_c0_g1_i3	1	TGT	XENTRQueuine tRNA-ribosyltransferase catalytic subunit 1 OS=Xenopus tropicalis OX=8364 GN=qtrt1 PE=2 SV=2
TRINITY_DN698_c0_g1_i13	1	TGS1	MOUSETrimethylguanosine synthase OS=Mus musculus OX=10090 GN=Tgs1 PE=1 SV=2
TRINITY_DN698_c0_g1_i60	1	TGS1	MOUSETrimethylguanosine synthase OS=Mus musculus OX=10090 GN=Tgs1 PE=1 SV=2
TRINITY_DN13190_c0_g1_i20	1	TGRM1	MOUSETOG array regulator of axonemal microtubules protein 1 OS=Mus musculus OX=10090 GN=Togaram1 PE=1 SV=3
TRINITY_DN13190_c0_g1_i17	1	TGRM1	MOUSETOG array regulator of axonemal microtubules protein 1 OS=Mus musculus OX=10090 GN=Togaram1 PE=1 SV=3
TRINITY_DN4190_c0_g1_i7	1	TGM1	RABITProtein-glutamine gamma-glutamyltransferase K OS=Oryctolagus cuniculus OX=9986 GN=TGM1 PE=2 SV=2
TRINITY_DN15131_c0_g1_i7	1	TGFB1	XENLATransforming growth factor beta-1 proprotein OS=Xenopus laevis OX=8355 GN=tgfb1 PE=2 SV=1
TRINITY_DN6796_c0_g1_i48	1	TFP11	PIGTuftelin-interacting protein 11 OS=Sus scrofa OX=9823 GN=TFIP11 PE=2 SV=1
TRINITY_DN12757_c0_g1_i2	1	TF3C5	MOUSEGeneral transcription factor 3C polypeptide 5 OS=Mus musculus OX=10090 GN=Gtf3c5 PE=2 SV=2
TRINITY_DN12757_c0_g1_i31	1	TF3C5	HUMANGeneral transcription factor 3C polypeptide 5 OS=Homo sapiens OX=9606 GN=GTF3C5 PE=1 SV=2
TRINITY_DN12757_c0_g1_i22	1	TF3C5	HUMANGeneral transcription factor 3C polypeptide 5 OS=Homo sapiens OX=9606 GN=GTF3C5 PE=1 SV=2
TRINITY_DN14086_c0_g1_i13	1	TF3C4	MOUSEGeneral transcription factor 3C polypeptide 4 OS=Mus musculus OX=10090 GN=Gtf3c4 PE=1 SV=2
TRINITY_DN3651_c0_g1_i184	1	TF3C3	HUMANGeneral transcription factor 3C polypeptide 3 OS=Homo sapiens OX=9606 GN=GTF3C3 PE=1 SV=1
TRINITY_DN799_c1_g2_i7	1	TF3C2	MOUSEGeneral transcription factor 3C polypeptide 2 OS=Mus musculus OX=10090 GN=Gtf3c2 PE=2 SV=2
TRINITY_DN5965_c0_g1_i9	1	TF3B	MOUSETranscription factor IIIB 90 kDa subunit OS=Mus musculus OX=10090 GN=Brf1 PE=1 SV=1
TRINITY_DN5965_c0_g1_i12	1	TF3B	MOUSETranscription factor IIIB 90 kDa subunit OS=Mus musculus OX=10090 GN=Brf1 PE=1 SV=1
TRINITY_DN5965_c0_g1_i10	1	TF3B	MOUSETranscription factor IIIB 90 kDa subunit OS=Mus musculus OX=10090 GN=Brf1 PE=1 SV=1
TRINITY_DN6945_c0_g1_i3	1	TF3B	HUMANTranscription factor IIIB 90 kDa subunit OS=Homo sapiens OX=9606 GN=BRF1 PE=1 SV=1
TRINITY_DN3341_c0_g1_i13	1	TF2H2	BOVINGeneral transcription factor IIH subunit 2 OS=Bos taurus OX=9913 GN=GTF2H2 PE=2 SV=1
TRINITY_DN2799_c0_g1_i12	1	TF2B	MOUSETranscription initiation factor IIB OS=Mus musculus OX=10090 GN=Gtf2b PE=1 SV=1
TRINITY_DN2799_c0_g1_i19	1	TF2B	DROMETranscription initiation factor IIB OS=Drosophila melanogaster OX=7227 GN=TfIIB PE=2 SV=1
TRINITY_DN18177_c0_g1_i2	1	TF2AA	HUMANTranscription initiation factor IIA subunit 1 OS=Homo sapiens OX=9606 GN=GTF2A1 PE=1 SV=1
TRINITY_DN18177_c0_g1_i8	1	TF2AA	DROMETranscription initiation factor IIA subunit 1 OS=Drosophila melanogaster OX=7227 GN=TfIIA-L PE=1 SV=2
TRINITY_DN9553_c0_g1_i12	1	TF211	SCHPOTransposon Tf2-11 polyprotein OS=Schizosaccharomyces pombe (strain 972 / ATCC 24843) OX=284812 GN=Tf2-11 PE=3 SV=1
TRINITY_DN34362_c0_g1_i2	1	TF211	SCHPOTransposon Tf2-11 polyprotein OS=Schizosaccharomyces pombe (strain 972 / ATCC 24843) OX=284812 GN=Tf2-11 PE=3 SV=1
TRINITY_DN2266_c1_g1_i7	1	TF211	SCHPOTransposon Tf2-11 polyprotein OS=Schizosaccharomyces pombe (strain 972 / ATCC 24843) OX=284812 GN=Tf2-11 PE=3 SV=1
TRINITY_DN10610_c0_g1_i21	1	TF211	SCHPOTransposon Tf2-11 polyprotein OS=Schizosaccharomyces pombe (strain 972 / ATCC 24843) OX=284812 GN=Tf2-11 PE=3 SV=1
TRINITY_DN4698_c0_g1_i4	1	TEX9	HUMANTestis-expressed protein 9 OS=Homo sapiens OX=9606 GN=TEX9 PE=1 SV=1
TRINITY_DN3512_c0_g1_i5	1	TEX2	HUMANTestis-expressed protein 2 OS=Homo sapiens OX=9606 GN=TEX2 PE=1 SV=2
TRINITY_DN15276_c0_g1_i2	1	TEX14	BOVINInactive serine/threonine-protein kinase TEX14 OS=Bos taurus OX=9913 GN=TEX14 PE=3 SV=2
TRINITY_DN58209_c0_g1_i1	1	TEX14	BOVINInactive serine/threonine-protein kinase TEX14 OS=Bos taurus OX=9913 GN=TEX14 PE=3 SV=2
TRINITY_DN2596_c1_g1_i3	1	TET2	HUMANMethylcytosine dioxygenase TET2 OS=Homo sapiens OX=9606 GN=TET2 PE=1 SV=3
TRINITY_DN8491_c0_g1_i7	1	TESK2	MOUSEDual specificity testis-specific protein kinase 2 OS=Mus musculus OX=10090 GN=Tesk2 PE=1 SV=1
TRINITY_DN11827_c1_g1_i6	1	TES	MONDOTestin OS=Monodelphis domestica OX=13616 GN=TES PE=3 SV=1
TRINITY_DN3735_c0_g1_i1	1	TERT	RATTelomerase reverse transcriptase OS=Rattus norvegicus OX=10116 GN=Tert PE=2 SV=1
TRINITY_DN1161_c1_g1_i10	1	TERT	RATTelomerase reverse transcriptase OS=Rattus norvegicus OX=10116 GN=Tert PE=2 SV=1
TRINITY_DN18605_c0_g1_i1	1	TERT	MOUSETelomerase reverse transcriptase OS=Mus musculus OX=10090 GN=Tert PE=1 SV=1
TRINITY_DN18605_c0_g1_i12	1	TERT	MOUSETelomerase reverse transcriptase OS=Mus musculus OX=10090 GN=Tert PE=1 SV=1
TRINITY_DN23461_c0_g1_i1	1	TERT	MOUSETelomerase reverse transcriptase OS=Mus musculus OX=10090 GN=Tert PE=1 SV=1
TRINITY_DN1161_c1_g1_i20	1	TERT	BOVINTelomerase reverse transcriptase OS=Bos taurus OX=9913 GN=TERT PE=3 SV=2
TRINITY_DN16687_c0_g1_i14	1	TERF	ASPTNKelch-like protein terF OS=Aspergillus terreus (strain NIH 2624 / FGSC A1156) OX=341663 GN=terF PE=1 SV=1
TRINITY_DN26977_c0_g1_i16	1	TERF	ASPTNKelch-like protein terF OS=Aspergillus terreus (strain NIH 2624 / FGSC A1156) OX=341663 GN=terF PE=1 SV=1
TRINITY_DN26977_c0_g1_i6	1	TERF	ASPTNKelch-like protein terF OS=Aspergillus terreus (strain NIH 2624 / FGSC A1156) OX=341663 GN=terF PE=1 SV=1
TRINITY_DN26977_c0_g1_i1	1	TERF	ASPTNKelch-like protein terF OS=Aspergillus terreus (strain NIH 2624 / FGSC A1156) OX=341663 GN=terF PE=1 SV=1
TRINITY_DN128_c0_g1_i8	1	TERF	ASPTNKelch-like protein terF OS=Aspergillus terreus (strain NIH 2624 / FGSC A1156) OX=341663 GN=terF PE=1 SV=1
TRINITY_DN34219_c0_g1_i1	1	TERA2	CAEELTransitional endoplasmic reticulum ATPase homolog 2 OS=Caenorhabditis elegans OX=6239 GN=cdc-48.2 PE=1 SV=2
TRINITY_DN30900_c0_g1_i1	1	TERA	XENLATransitional endoplasmic reticulum ATPase OS=Xenopus laevis OX=8355 GN=vcp PE=1 SV=3
TRINITY_DN14450_c0_g1_i8	1	TERA	XENLATransitional endoplasmic reticulum ATPase OS=Xenopus laevis OX=8355 GN=vcp PE=1 SV=3
TRINITY_DN125881_c0_g1_i1	1	TERA	BOVINTransitional endoplasmic reticulum ATPase OS=Bos taurus OX=9913 GN=VCP PE=2 SV=1
TRINITY_DN17209_c0_g1_i7	1	TENN	MOUSETenascin-N OS=Mus musculus OX=10090 GN=Tnn PE=1 SV=2
TRINITY_DN22106_c0_g1_i1	1	TENA	CHICKTenascin OS=Gallus gallus OX=9031 GN=TNC PE=1 SV=2
TRINITY_DN22106_c0_g1_i8	1	TENA	CHICKTenascin OS=Gallus gallus OX=9031 GN=TNC PE=1 SV=2
TRINITY_DN8157_c0_g1_i12	1	TELO2	DANRETelomere length regulation protein TEL2 homolog OS=Danio rerio OX=7955 GN=telo2 PE=2 SV=2
TRINITY_DN4021_c0_g1_i7	1	TEKT1	HUMANTektin-1 OS=Homo sapiens OX=9606 GN=TEKT1 PE=1 SV=1
TRINITY_DN39164_c0_g1_i1	1	TECTA	MOUSEAlpha-tectorin OS=Mus musculus OX=10090 GN=Tecta PE=1 SV=2
TRINITY_DN19111_c0_g1_i2	1	TECTA	CHICKAlpha-tectorin OS=Gallus gallus OX=9031 GN=TECTA PE=1 SV=1
TRINITY_DN42885_c2_g1_i2	1	TECR	DICDIVery-long-chain enoyl-CoA reductase OS=Dictyostelium discoideum OX=44689 GN=gpsn2 PE=3 SV=1
TRINITY_DN3849_c0_g1_i79	1	TECR	CAEELProbable very-long-chain enoyl-CoA reductase art-1 OS=Caenorhabditis elegans OX=6239 GN=art-1 PE=3 SV=1
TRINITY_DN10051_c0_g1_i3	1	TEB1	SCHPOTelobox protein 1 OS=Schizosaccharomyces pombe (strain 972 / ATCC 24843) OX=284812 GN=teb1 PE=1 SV=1
TRINITY_DN3307_c1_g1_i12	1	TEAD4	HUMANTranscriptional enhancer factor TEF-3 OS=Homo sapiens OX=9606 GN=TEAD4 PE=1 SV=3
TRINITY_DN3307_c1_g1_i19	1	TEAD4	HUMANTranscriptional enhancer factor TEF-3 OS=Homo sapiens OX=9606 GN=TEAD4 PE=1 SV=3
TRINITY_DN3307_c1_g1_i16	1	TEAD3	HUMANTranscriptional enhancer factor TEF-5 OS=Homo sapiens OX=9606 GN=TEAD3 PE=1 SV=2
TRINITY_DN547_c1_g1_i102	1	TDT	XENLADNA nucleotidylexotransferase OS=Xenopus laevis OX=8355 GN=dntt PE=2 SV=1
TRINITY_DN15955_c0_g1_i10	1	TDRKH	HUMANTudor and KH domain-containing protein OS=Homo sapiens OX=9606 GN=TDRKH PE=1 SV=2
TRINITY_DN5310_c0_g1_i76	1	TDRD1	MOUSETudor domain-containing protein 1 OS=Mus musculus OX=10090 GN=Tdrd1 PE=1 SV=2
TRINITY_DN5310_c0_g1_i70	1	TDRD1	MOUSETudor domain-containing protein 1 OS=Mus musculus OX=10090 GN=Tdrd1 PE=1 SV=2
TRINITY_DN3893_c0_g1_i1	1	TDIF2	HUMANDeoxynucleotidyltransferase terminal-interacting protein 2 OS=Homo sapiens OX=9606 GN=DNTTIP2 PE=1 SV=2
TRINITY_DN3532_c0_g1_i15	1	TDIF1	MOUSEDeoxynucleotidyltransferase terminal-interacting protein 1 OS=Mus musculus OX=10090 GN=Dnttip1 PE=1 SV=1
TRINITY_DN3532_c0_g1_i16	1	TDIF1	MOUSEDeoxynucleotidyltransferase terminal-interacting protein 1 OS=Mus musculus OX=10090 GN=Dnttip1 PE=1 SV=1
TRINITY_DN7758_c0_g1_i28	1	TDH	BOVINL-threonine 3-dehydrogenase, mitochondrial OS=Bos taurus OX=9913 GN=TDH PE=2 SV=1
TRINITY_DN141254_c0_g1_i1	1	TCSA	LISINCD4+ T-cell-stimulating antigen OS=Listeria innocua serovar 6a (strain ATCC BAA-680 / CLIP 11262) OX=272626 GN=tcsA PE=3 SV=1
TRINITY_DN7024_c0_g1_i94	1	TCRG1	HUMANTranscription elongation regulator 1 OS=Homo sapiens OX=9606 GN=TCERG1 PE=1 SV=2
TRINITY_DN7024_c0_g1_i7	1	TCRG1	HUMANTranscription elongation regulator 1 OS=Homo sapiens OX=9606 GN=TCERG1 PE=1 SV=2
TRINITY_DN7024_c0_g1_i14	1	TCRG1	HUMANTranscription elongation regulator 1 OS=Homo sapiens OX=9606 GN=TCERG1 PE=1 SV=2
TRINITY_DN1159_c0_g1_i1	1	TCPZ	MOUSET-complex protein 1 subunit zeta OS=Mus musculus OX=10090 GN=Cct6a PE=1 SV=3
TRINITY_DN101703_c0_g1_i1	1	TCPH	BOVINT-complex protein 1 subunit eta OS=Bos taurus OX=9913 GN=CCT7 PE=1 SV=1
TRINITY_DN568_c0_g1_i18	1	TCPB	MOUSET-complex protein 1 subunit beta OS=Mus musculus OX=10090 GN=Cct2 PE=1 SV=4
TRINITY_DN568_c0_g1_i14	1	TCPB	MOUSET-complex protein 1 subunit beta OS=Mus musculus OX=10090 GN=Cct2 PE=1 SV=4
TRINITY_DN106_c0_g2_i1	1	TCF25	HUMANTranscription factor 25 OS=Homo sapiens OX=9606 GN=TCF25 PE=1 SV=1
TRINITY_DN918_c1_g1_i2	1	TCF19	PANTRTranscription factor 19 OS=Pan troglodytes OX=9598 GN=TCF19 PE=3 SV=1
TRINITY_DN64_c0_g1_i67	1	TCB2	CAEBRTransposable element Tcb2 transposase OS=Caenorhabditis briggsae OX=6238 PE=3 SV=1
TRINITY_DN15248_c0_g2_i12	1	TCB1	CAEBRTransposable element Tcb1 transposase OS=Caenorhabditis briggsae OX=6238 PE=3 SV=1
TRINITY_DN15248_c0_g2_i10	1	TCB1	CAEBRTransposable element Tcb1 transposase OS=Caenorhabditis briggsae OX=6238 PE=3 SV=1
TRINITY_DN15248_c0_g1_i20	1	TCB1	CAEBRTransposable element Tcb1 transposase OS=Caenorhabditis briggsae OX=6238 PE=3 SV=1
TRINITY_DN10887_c0_g1_i9	1	TCAB1	MOUSETelomerase Cajal body protein 1 OS=Mus musculus OX=10090 GN=Wrap53 PE=1 SV=1
TRINITY_DN429_c0_g1_i1	1	TC32A	BRANAShort-chain dehydrogenase TIC 32 A, chloroplastic OS=Brassica napus OX=3708 GN=TIC32A PE=2 SV=1
TRINITY_DN9191_c0_g1_i9	1	TC1A	CAEELTransposable element Tc1 transposase OS=Caenorhabditis elegans OX=6239 GN=tc1a PE=3 SV=1
TRINITY_DN89812_c0_g1_i1	1	TC159	ARATHTranslocase of chloroplast 159, chloroplastic OS=Arabidopsis thaliana OX=3702 GN=TOC159 PE=1 SV=1
TRINITY_DN14855_c1_g1_i1	1	TC159	ARATHTranslocase of chloroplast 159, chloroplastic OS=Arabidopsis thaliana OX=3702 GN=TOC159 PE=1 SV=1
TRINITY_DN3780_c0_g1_i5	1	TBX5A	DANRET-box transcription factor TBX5-A OS=Danio rerio OX=7955 GN=tbx5a PE=2 SV=2
TRINITY_DN3140_c0_g1_i15	1	TBX3	CHICKT-box transcription factor TBX3 (Fragment) OS=Gallus gallus OX=9031 GN=TBX3 PE=2 SV=1
TRINITY_DN12822_c0_g1_i1	1	TBPL2	XENLATATA box-binding protein-like protein 2 OS=Xenopus laevis OX=8355 GN=tbpl2 PE=2 SV=1
TRINITY_DN1035_c1_g1_i18	1	TBL3	BOVINTransducin beta-like protein 3 OS=Bos taurus OX=9913 GN=TBL3 PE=2 SV=1
TRINITY_DN6476_c0_g1_i1	1	TBL2	HUMANTransducin beta-like protein 2 OS=Homo sapiens OX=9606 GN=TBL2 PE=1 SV=1
TRINITY_DN842_c0_g1_i17	1	TBL1R	MOUSEF-box-like/WD repeat-containing protein TBL1XR1 OS=Mus musculus OX=10090 GN=Tbl1xr1 PE=1 SV=1
TRINITY_DN842_c0_g1_i3	1	TBL1R	MOUSEF-box-like/WD repeat-containing protein TBL1XR1 OS=Mus musculus OX=10090 GN=Tbl1xr1 PE=1 SV=1
TRINITY_DN842_c0_g1_i31	1	TBL1R	MOUSEF-box-like/WD repeat-containing protein TBL1XR1 OS=Mus musculus OX=10090 GN=Tbl1xr1 PE=1 SV=1
TRINITY_DN4547_c0_g1_i7	1	TBH1	DROMETyramine beta-hydroxylase OS=Drosophila melanogaster OX=7227 GN=Tbh PE=1 SV=1
TRINITY_DN171_c0_g1_i83	1	TBG1	BOVINTubulin gamma-1 chain OS=Bos taurus OX=9913 GN=TUBG1 PE=2 SV=1
TRINITY_DN463_c0_g1_i31	1	TBD2B	MOUSETBC1 domain family member 2B OS=Mus musculus OX=10090 GN=Tbc1d2b PE=1 SV=2
TRINITY_DN361_c0_g1_i29	1	TBD	MACFATubulin delta chain OS=Macaca fascicularis OX=9541 GN=TUBD1 PE=2 SV=1
TRINITY_DN361_c0_g1_i10	1	TBD	MACFATubulin delta chain OS=Macaca fascicularis OX=9541 GN=TUBD1 PE=2 SV=1
TRINITY_DN361_c0_g1_i9	1	TBD	MACFATubulin delta chain OS=Macaca fascicularis OX=9541 GN=TUBD1 PE=2 SV=1
TRINITY_DN4229_c0_g1_i13	1	TBCK	MOUSETBC domain-containing protein kinase-like protein OS=Mus musculus OX=10090 GN=Tbck PE=1 SV=1
TRINITY_DN6548_c0_g1_i84	1	TBCEL	HUMANTubulin-specific chaperone cofactor E-like protein OS=Homo sapiens OX=9606 GN=TBCEL PE=1 SV=2
TRINITY_DN2505_c0_g1_i46	1	TBCD9	HUMANTBC1 domain family member 9 OS=Homo sapiens OX=9606 GN=TBC1D9 PE=2 SV=2
TRINITY_DN3417_c0_g1_i3	1	TBCD4	HUMANTBC1 domain family member 4 OS=Homo sapiens OX=9606 GN=TBC1D4 PE=1 SV=2
TRINITY_DN3427_c0_g1_i3	1	TBCD	HUMANTubulin-specific chaperone D OS=Homo sapiens OX=9606 GN=TBCD PE=1 SV=2
TRINITY_DN1898_c0_g1_i19	1	TBCC1	MOUSETBCC domain-containing protein 1 OS=Mus musculus OX=10090 GN=Tbccd1 PE=1 SV=1
TRINITY_DN3718_c0_g1_i25	1	TBCB	DICDITubulin-specific chaperone B OS=Dictyostelium discoideum OX=44689 GN=tbcb PE=3 SV=1
TRINITY_DN2458_c0_g1_i1	1	TBCB	BOVINTubulin-folding cofactor B OS=Bos taurus OX=9913 GN=TBCB PE=2 SV=1
TRINITY_DN318_c3_g1_i2	1	TBC9B	MOUSETBC1 domain family member 9B OS=Mus musculus OX=10090 GN=Tbc1d9b PE=1 SV=1
TRINITY_DN2355_c1_g1_i7	1	TBC31	XENLATBC1 domain family member 31 OS=Xenopus laevis OX=8355 GN=tbc1d31 PE=2 SV=1
TRINITY_DN2355_c1_g1_i6	1	TBC31	XENLATBC1 domain family member 31 OS=Xenopus laevis OX=8355 GN=tbc1d31 PE=2 SV=1
TRINITY_DN21379_c0_g1_i12	1	TBC20	HUMANTBC1 domain family member 20 OS=Homo sapiens OX=9606 GN=TBC1D20 PE=1 SV=1
TRINITY_DN11986_c0_g1_i23	1	TBC19	HUMANTBC1 domain family member 19 OS=Homo sapiens OX=9606 GN=TBC1D19 PE=1 SV=2
TRINITY_DN11986_c0_g1_i15	1	TBC19	HUMANTBC1 domain family member 19 OS=Homo sapiens OX=9606 GN=TBC1D19 PE=1 SV=2
TRINITY_DN4006_c0_g1_i12	1	TBC16	HUMANTBC1 domain family member 16 OS=Homo sapiens OX=9606 GN=TBC1D16 PE=2 SV=1
TRINITY_DN10622_c0_g1_i21	1	TBC16	HUMANTBC1 domain family member 16 OS=Homo sapiens OX=9606 GN=TBC1D16 PE=2 SV=1
TRINITY_DN424_c0_g1_i41	1	TBC15	HUMANTBC1 domain family member 15 OS=Homo sapiens OX=9606 GN=TBC1D15 PE=1 SV=2
TRINITY_DN4006_c0_g1_i34	1	TBC15	HUMANTBC1 domain family member 15 OS=Homo sapiens OX=9606 GN=TBC1D15 PE=1 SV=2
TRINITY_DN4006_c0_g1_i27	1	TBC15	HUMANTBC1 domain family member 15 OS=Homo sapiens OX=9606 GN=TBC1D15 PE=1 SV=2
TRINITY_DN17353_c1_g1_i1	1	TBB4B	MESAUTubulin beta-4B chain (Fragments) OS=Mesocricetus auratus OX=10036 GN=TUBB4B PE=1 SV=1
TRINITY_DN30631_c0_g2_i1	1	TBB4B	BOVINTubulin beta-4B chain OS=Bos taurus OX=9913 GN=TUBB4B PE=2 SV=1
TRINITY_DN56016_c0_g1_i1	1	TBB	STRPUTubulin beta chain (Fragment) OS=Strongylocentrotus purpuratus OX=7668 PE=2 SV=1
TRINITY_DN30631_c1_g1_i1	1	TBB	LYTPITubulin beta chain (Fragment) OS=Lytechinus pictus OX=7653 PE=2 SV=1
TRINITY_DN28669_c0_g1_i1	1	TBB	COPC7Tubulin beta chain OS=Coprinopsis cinerea (strain Okayama-7 / 130 / ATCC MYA-4618 / FGSC 9003) OX=240176 GN=CC1G
TRINITY_DN2359_c0_g1_i15	1	TBATA	BOVINProtein TBATA OS=Bos taurus OX=9913 GN=TBATA PE=2 SV=1
TRINITY_DN74288_c0_g1_i1	1	TBAN	PHYPOTubulin alpha-1B chain OS=Physarum polycephalum OX=5791 GN=ALTBN PE=2 SV=2
TRINITY_DN58264_c0_g1_i1	1	TBA3C	HUMANTubulin alpha-3C chain OS=Homo sapiens OX=9606 GN=TUBA3C PE=1 SV=1
TRINITY_DN58264_c1_g1_i1	1	TBA3	DROMETubulin alpha-3 chain OS=Drosophila melanogaster OX=7227 GN=alphaTub84D PE=2 SV=1
TRINITY_DN16480_c0_g1_i1	1	TBA2	PATVUTubulin alpha-2/alpha-4 chain OS=Patella vulgata OX=6465 GN=TUB2 PE=2 SV=1
TRINITY_DN86_c0_g1_i6	1	TBA1D	BOVINTubulin alpha-1D chain OS=Bos taurus OX=9913 GN=TUBA1D PE=1 SV=1
TRINITY_DN8780_c2_g1_i12	1	TBA1A	CRIGRTubulin alpha-1A chain OS=Cricetulus griseus OX=10029 GN=TUBA1A PE=2 SV=1
TRINITY_DN2378_c0_g2_i3	1	TBA1	PARLITubulin alpha-1 chain OS=Paracentrotus lividus OX=7656 PE=2 SV=1
TRINITY_DN8673_c0_g2_i4	1	TBA1	DROMETubulin alpha-1 chain OS=Drosophila melanogaster OX=7227 GN=alphaTub84B PE=1 SV=1
TRINITY_DN8780_c2_g1_i8	1	TBA1	DROMETubulin alpha-1 chain OS=Drosophila melanogaster OX=7227 GN=alphaTub84B PE=1 SV=1
TRINITY_DN8673_c0_g2_i2	1	TBA1	DROMETubulin alpha-1 chain OS=Drosophila melanogaster OX=7227 GN=alphaTub84B PE=1 SV=1
TRINITY_DN41917_c0_g1_i3	1	TBA1	CHLRETubulin alpha-1 chain OS=Chlamydomonas reinhardtii OX=3055 GN=TUBA1 PE=1 SV=1
TRINITY_DN136466_c0_g1_i1	1	TBA	LYTPITubulin alpha chain (Fragment) OS=Lytechinus pictus OX=7653 PE=3 SV=1
TRINITY_DN19376_c0_g1_i1	1	TAXB1	RATTax1-binding protein 1 homolog OS=Rattus norvegicus OX=10116 GN=Tax1bp1 PE=2 SV=1
TRINITY_DN15678_c0_g1_i55	1	TARB1	HUMANProbable methyltransferase TARBP1 OS=Homo sapiens OX=9606 GN=TARBP1 PE=1 SV=1
TRINITY_DN15678_c0_g1_i57	1	TARB1	HUMANProbable methyltransferase TARBP1 OS=Homo sapiens OX=9606 GN=TARBP1 PE=1 SV=1
TRINITY_DN15678_c0_g1_i36	1	TARB1	HUMANProbable methyltransferase TARBP1 OS=Homo sapiens OX=9606 GN=TARBP1 PE=1 SV=1
TRINITY_DN15678_c0_g1_i12	1	TARB1	HUMANProbable methyltransferase TARBP1 OS=Homo sapiens OX=9606 GN=TARBP1 PE=1 SV=1
TRINITY_DN15678_c0_g1_i1	1	TARB1	HUMANProbable methyltransferase TARBP1 OS=Homo sapiens OX=9606 GN=TARBP1 PE=1 SV=1
TRINITY_DN15871_c0_g1_i1	1	TAPT1	XENLATransmembrane anterior posterior transformation protein 1 homolog OS=Xenopus laevis OX=8355 GN=tapt1 PE=2 SV=1
TRINITY_DN15871_c0_g1_i40	1	TAPT1	XENLATransmembrane anterior posterior transformation protein 1 homolog OS=Xenopus laevis OX=8355 GN=tapt1 PE=2 SV=1
TRINITY_DN15871_c0_g1_i19	1	TAPT1	XENLATransmembrane anterior posterior transformation protein 1 homolog OS=Xenopus laevis OX=8355 GN=tapt1 PE=2 SV=1
TRINITY_DN1415_c0_g1_i36	1	TAPT1	MOUSETransmembrane anterior posterior transformation protein 1 OS=Mus musculus OX=10090 GN=Tapt1 PE=1 SV=2
TRINITY_DN7688_c0_g1_i17	1	TAPT1	MOUSETransmembrane anterior posterior transformation protein 1 OS=Mus musculus OX=10090 GN=Tapt1 PE=1 SV=2
TRINITY_DN12196_c0_g1_i1	1	TAPT1	DANRETransmembrane anterior posterior transformation protein 1 homolog OS=Danio rerio OX=7955 GN=tapt1 PE=2 SV=1
TRINITY_DN1415_c0_g1_i9	1	TAPT1	DANRETransmembrane anterior posterior transformation protein 1 homolog OS=Danio rerio OX=7955 GN=tapt1 PE=2 SV=1
TRINITY_DN1415_c0_g1_i20	1	TAPT1	DANRETransmembrane anterior posterior transformation protein 1 homolog OS=Danio rerio OX=7955 GN=tapt1 PE=2 SV=1
TRINITY_DN1415_c0_g1_i33	1	TAPT1	DANRETransmembrane anterior posterior transformation protein 1 homolog OS=Danio rerio OX=7955 GN=tapt1 PE=2 SV=1
TRINITY_DN7_c0_g1_i4	1	TAPT1	CHICKTransmembrane anterior posterior transformation protein 1 homolog OS=Gallus gallus OX=9031 GN=TAPT1 PE=2 SV=2
TRINITY_DN7_c0_g1_i35	1	TAPT1	CHICKTransmembrane anterior posterior transformation protein 1 homolog OS=Gallus gallus OX=9031 GN=TAPT1 PE=2 SV=2
TRINITY_DN1415_c0_g1_i15	1	TAPT1	CHICKTransmembrane anterior posterior transformation protein 1 homolog OS=Gallus gallus OX=9031 GN=TAPT1 PE=2 SV=2
TRINITY_DN2814_c0_g1_i2	1	TAOK3	XENLASerine/threonine-protein kinase TAO3 OS=Xenopus laevis OX=8355 GN=taok3 PE=2 SV=1
TRINITY_DN1346_c21_g1_i3	1	TAM41	DANREPhosphatidate cytidylyltransferase, mitochondrial OS=Danio rerio OX=7955 GN=tamm41 PE=2 SV=1
TRINITY_DN1346_c21_g1_i6	1	TAM41	DANREPhosphatidate cytidylyltransferase, mitochondrial OS=Danio rerio OX=7955 GN=tamm41 PE=2 SV=1
TRINITY_DN27441_c0_g1_i1	1	TAM	ACIACTrans-aconitate 2-methyltransferase OS=Acidovorax citrulli (strain AAC00-1) OX=397945 GN=tam PE=3 SV=1
TRINITY_DN5166_c0_g1_i2	1	TALDO	RATTransaldolase OS=Rattus norvegicus OX=10116 GN=Taldo1 PE=1 SV=2
TRINITY_DN121086_c0_g1_i1	1	TAKP	RHOS4Alpha-keto acid-binding periplasmic protein TakP OS=Rhodobacter sphaeroides (strain ATCC 17023 / 2.4.1 / NCIB 8253 / DSM 158) OX=272943 GN=takP PE=1 SV=1
TRINITY_DN107613_c0_g1_i1	1	TAKP	RHOS4Alpha-keto acid-binding periplasmic protein TakP OS=Rhodobacter sphaeroides (strain ATCC 17023 / 2.4.1 / NCIB 8253 / DSM 158) OX=272943 GN=takP PE=1 SV=1
TRINITY_DN5802_c0_g1_i1	1	TAF7	CRIGRTranscription initiation factor TFIID subunit 7 OS=Cricetulus griseus OX=10029 GN=TAF7 PE=1 SV=1
TRINITY_DN552_c3_g1_i2	1	TAF4	DROMETranscription initiation factor TFIID subunit 4 OS=Drosophila melanogaster OX=7227 GN=Taf4 PE=1 SV=1
TRINITY_DN4331_c0_g1_i3	1	TAF2	HUMANTranscription initiation factor TFIID subunit 2 OS=Homo sapiens OX=9606 GN=TAF2 PE=1 SV=3
TRINITY_DN4331_c0_g1_i10	1	TAF2	DANRETranscription initiation factor TFIID subunit 2 OS=Danio rerio OX=7955 GN=taf2 PE=2 SV=2
TRINITY_DN1884_c0_g1_i3	1	TAF10	HUMANTranscription initiation factor TFIID subunit 10 OS=Homo sapiens OX=9606 GN=TAF10 PE=1 SV=1
TRINITY_DN829_c0_g1_i5	1	TAF1	MESAUTranscription initiation factor TFIID subunit 1 OS=Mesocricetus auratus OX=10036 GN=TAF1 PE=2 SV=1
TRINITY_DN440_c0_g1_i3	1	TADBP	XENTRTAR DNA-binding protein 43 OS=Xenopus tropicalis OX=8364 GN=tardbp PE=2 SV=1
TRINITY_DN3563_c0_g1_i19	1	TAD2B	HUMANTranscriptional adapter 2-beta OS=Homo sapiens OX=9606 GN=TADA2B PE=1 SV=2
TRINITY_DN47924_c0_g1_i19	1	TAD2A	BOVINTranscriptional adapter 2-alpha OS=Bos taurus OX=9913 GN=TADA2A PE=2 SV=1
TRINITY_DN488_c0_g1_i2	1	TAB1	HUMANTGF-beta-activated kinase 1 and MAP3K7-binding protein 1 OS=Homo sapiens OX=9606 GN=TAB1 PE=1 SV=1
TRINITY_DN7769_c0_g1_i5	1	TAB1	HUMANTGF-beta-activated kinase 1 and MAP3K7-binding protein 1 OS=Homo sapiens OX=9606 GN=TAB1 PE=1 SV=1
TRINITY_DN488_c0_g1_i15	1	TAB1	HUMANTGF-beta-activated kinase 1 and MAP3K7-binding protein 1 OS=Homo sapiens OX=9606 GN=TAB1 PE=1 SV=1
TRINITY_DN3264_c0_g1_i14	1	T7L1C	XENLATranscription factor 7-like 1-C OS=Xenopus laevis OX=8355 GN=tcf7l1-c PE=2 SV=1
TRINITY_DN5404_c0_g1_i4	1	T3HPD	XENTRTrans-L-3-hydroxyproline dehydratase OS=Xenopus tropicalis OX=8364 GN=l3hypdh PE=2 SV=1
TRINITY_DN4649_c0_g1_i4	1	T38B2	CAEELTrimeric intracellular cation channel type 1B.2 OS=Caenorhabditis elegans OX=6239 GN=tric-1B.2 PE=1 SV=2
TRINITY_DN37306_c0_g1_i21	1	T2EA	MOUSEGeneral transcription factor IIE subunit 1 OS=Mus musculus OX=10090 GN=Gtf2e1 PE=1 SV=1
TRINITY_DN3999_c0_g1_i9	1	T185B	MOUSETransmembrane protein 185B OS=Mus musculus OX=10090 GN=Tmem185b PE=2 SV=1
TRINITY_DN3999_c0_g1_i18	1	T185A	HUMANTransmembrane protein 185A OS=Homo sapiens OX=9606 GN=TMEM185A PE=1 SV=2
TRINITY_DN22422_c0_g1_i21	1	T120B	XENTRTransmembrane protein 120B OS=Xenopus tropicalis OX=8364 GN=tmem120b PE=2 SV=1
TRINITY_DN3898_c0_g1_i10	1	SYWC	RABITTryptophan--tRNA ligase, cytoplasmic OS=Oryctolagus cuniculus OX=9986 GN=WARS PE=2 SV=3
TRINITY_DN3898_c0_g1_i12	1	SYWC	HUMANTryptophan--tRNA ligase, cytoplasmic OS=Homo sapiens OX=9606 GN=WARS PE=1 SV=2
TRINITY_DN108323_c0_g1_i1	1	SYW	SYNPXTryptophan--tRNA ligase OS=Synechococcus sp. (strain WH8102) OX=84588 GN=trpS PE=3 SV=1
TRINITY_DN2423_c0_g1_i2	1	SYVNB	XENLAE3 ubiquitin-protein ligase synoviolin B OS=Xenopus laevis OX=8355 GN=syvn1-b PE=2 SV=1
TRINITY_DN7326_c0_g1_i229	1	SYVC	TAKRUValine--tRNA ligase OS=Takifugu rubripes OX=31033 GN=vars PE=3 SV=1
TRINITY_DN4296_c0_g1_i4	1	SYTL5	HUMANSynaptotagmin-like protein 5 OS=Homo sapiens OX=9606 GN=SYTL5 PE=1 SV=1
TRINITY_DN1598_c0_g1_i41	1	SYTL5	HUMANSynaptotagmin-like protein 5 OS=Homo sapiens OX=9606 GN=SYTL5 PE=1 SV=1
TRINITY_DN1598_c0_g1_i8	1	SYTL5	HUMANSynaptotagmin-like protein 5 OS=Homo sapiens OX=9606 GN=SYTL5 PE=1 SV=1
TRINITY_DN1598_c0_g1_i32	1	SYTL5	HUMANSynaptotagmin-like protein 5 OS=Homo sapiens OX=9606 GN=SYTL5 PE=1 SV=1
TRINITY_DN25479_c0_g1_i3	1	SYT7	MOUSESynaptotagmin-7 OS=Mus musculus OX=10090 GN=Syt7 PE=1 SV=1
TRINITY_DN3081_c0_g1_i1	1	SYT1	ANSCYSynaptotagmin-1 OS=Anser cygnoid OX=8845 GN=SYT1 PE=2 SV=1
TRINITY_DN67399_c0_g1_i1	1	SYT	SYNS3Threonine--tRNA ligase OS=Synechococcus sp. (strain CC9311) OX=64471 GN=thrS PE=3 SV=1
TRINITY_DN84331_c0_g1_i1	1	SYT	FLAPJThreonine--tRNA ligase OS=Flavobacterium psychrophilum (strain JIP02/86 / ATCC 49511) OX=402612 GN=thrS PE=3 SV=1
TRINITY_DN319_c2_g1_i43	1	SYSM	BOVINSerine--tRNA ligase, mitochondrial OS=Bos taurus OX=9913 GN=SARS2 PE=1 SV=1
TRINITY_DN319_c2_g1_i27	1	SYSM	ARATHSerine--tRNA ligase, chloroplastic/mitochondrial OS=Arabidopsis thaliana OX=3702 GN=OVA7 PE=2 SV=1
TRINITY_DN7466_c0_g1_i1	1	SYSM	ARATHSerine--tRNA ligase, chloroplastic/mitochondrial OS=Arabidopsis thaliana OX=3702 GN=OVA7 PE=2 SV=1
TRINITY_DN319_c2_g1_i30	1	SYS	THEFYSerine--tRNA ligase OS=Thermobifida fusca (strain YX) OX=269800 GN=serS PE=3 SV=1
TRINITY_DN5641_c0_g1_i2	1	SYQ	BOVINGlutamine--tRNA ligase OS=Bos taurus OX=9913 GN=QARS PE=2 SV=1
TRINITY_DN1698_c0_g2_i4	1	SYQ	BOVINGlutamine--tRNA ligase OS=Bos taurus OX=9913 GN=QARS PE=2 SV=1
TRINITY_DN4445_c0_g1_i44	1	SYPM	HUMANProbable proline--tRNA ligase, mitochondrial OS=Homo sapiens OX=9606 GN=PARS2 PE=1 SV=1
TRINITY_DN59824_c0_g1_i1	1	SYP	FLAJ1Proline--tRNA ligase OS=Flavobacterium johnsoniae (strain ATCC 17061 / DSM 2064 / UW101) OX=376686 GN=proS PE=3 SV=1
TRINITY_DN2885_c0_g1_i10	1	SYNRG	HUMANSynergin gamma OS=Homo sapiens OX=9606 GN=SYNRG PE=1 SV=2
TRINITY_DN2885_c0_g1_i15	1	SYNRG	HUMANSynergin gamma OS=Homo sapiens OX=9606 GN=SYNRG PE=1 SV=2
TRINITY_DN3210_c0_g1_i38	1	SYNC	HUMANAsparagine--tRNA ligase, cytoplasmic OS=Homo sapiens OX=9606 GN=NARS1 PE=1 SV=1
TRINITY_DN3210_c0_g1_i109	1	SYNC	HUMANAsparagine--tRNA ligase, cytoplasmic OS=Homo sapiens OX=9606 GN=NARS1 PE=1 SV=1
TRINITY_DN3210_c0_g1_i77	1	SYNC	BOVINAsparagine--tRNA ligase, cytoplasmic OS=Bos taurus OX=9913 GN=NARS PE=2 SV=3
TRINITY_DN3210_c0_g1_i117	1	SYNC	BOVINAsparagine--tRNA ligase, cytoplasmic OS=Bos taurus OX=9913 GN=NARS PE=2 SV=3
TRINITY_DN2249_c0_g1_i61	1	SYMM	HUMANMethionine--tRNA ligase, mitochondrial OS=Homo sapiens OX=9606 GN=MARS2 PE=1 SV=2
TRINITY_DN5870_c0_g1_i49	1	SYMC	XENLAMethionine--tRNA ligase, cytoplasmic OS=Xenopus laevis OX=8355 GN=mars PE=2 SV=1
TRINITY_DN5870_c0_g1_i23	1	SYMC	XENLAMethionine--tRNA ligase, cytoplasmic OS=Xenopus laevis OX=8355 GN=mars PE=2 SV=1
TRINITY_DN2487_c0_g1_i2	1	SYLC	MOUSELeucine--tRNA ligase, cytoplasmic OS=Mus musculus OX=10090 GN=Lars PE=1 SV=2
TRINITY_DN1895_c0_g1_i152	1	SYL	THEEBLeucine--tRNA ligase OS=Thermosynechococcus elongatus (strain BP-1) OX=197221 GN=leuS PE=3 SV=1
TRINITY_DN1895_c0_g1_i94	1	SYL	THEEBLeucine--tRNA ligase OS=Thermosynechococcus elongatus (strain BP-1) OX=197221 GN=leuS PE=3 SV=1
TRINITY_DN97012_c0_g1_i1	1	SYK	SHELPLysine--tRNA ligase OS=Shewanella loihica (strain ATCC BAA-1088 / PV-4) OX=323850 GN=lysS PE=3 SV=1
TRINITY_DN168_c0_g1_i10	1	SYK	MOUSELysine--tRNA ligase OS=Mus musculus OX=10090 GN=Kars1 PE=1 SV=1
TRINITY_DN168_c0_g1_i9	1	SYK	HUMANLysine--tRNA ligase OS=Homo sapiens OX=9606 GN=KARS1 PE=1 SV=3
TRINITY_DN1946_c0_g1_i8	1	SYJ2B	BOVINSynaptojanin-2-binding protein OS=Bos taurus OX=9913 GN=SYNJ2BP PE=2 SV=1
TRINITY_DN1946_c0_g1_i5	1	SYJ2B	BOVINSynaptojanin-2-binding protein OS=Bos taurus OX=9913 GN=SYNJ2BP PE=2 SV=1
TRINITY_DN1946_c0_g1_i16	1	SYJ2B	BOVINSynaptojanin-2-binding protein OS=Bos taurus OX=9913 GN=SYNJ2BP PE=2 SV=1
TRINITY_DN1124_c0_g1_i4	1	SYIC	MOUSEIsoleucine--tRNA ligase, cytoplasmic OS=Mus musculus OX=10090 GN=Iars PE=1 SV=2
TRINITY_DN12558_c1_g1_i1	1	SYIC	HUMANIsoleucine--tRNA ligase, cytoplasmic OS=Homo sapiens OX=9606 GN=IARS PE=1 SV=2
TRINITY_DN15527_c0_g1_i2	1	SYIC	CAEELIsoleucine--tRNA ligase, cytoplasmic OS=Caenorhabditis elegans OX=6239 GN=iars-1 PE=3 SV=1
TRINITY_DN90378_c0_g1_i1	1	SYI	MARMSIsoleucine--tRNA ligase OS=Marinomonas sp. (strain MWYL1) OX=400668 GN=ileS PE=3 SV=1
TRINITY_DN2069_c0_g1_i13	1	SYI	CROS5Isoleucine--tRNA ligase OS=Crocosphaera subtropica (strain ATCC 51142 / BH68) OX=43989 GN=ileS PE=3 SV=1
TRINITY_DN2069_c0_g1_i1	1	SYI	CROS5Isoleucine--tRNA ligase OS=Crocosphaera subtropica (strain ATCC 51142 / BH68) OX=43989 GN=ileS PE=3 SV=1
TRINITY_DN5774_c0_g1_i10	1	SYHC	BOVINHistidine--tRNA ligase, cytoplasmic OS=Bos taurus OX=9913 GN=HARS PE=2 SV=1
TRINITY_DN19890_c0_g1_i2	1	SYG1	CAEELSynaptogenesis protein syg-1 OS=Caenorhabditis elegans OX=6239 GN=syg-1 PE=1 SV=1
TRINITY_DN103157_c0_g1_i1	1	SYFB	SYNPXPhenylalanine--tRNA ligase beta subunit OS=Synechococcus sp. (strain WH8102) OX=84588 GN=pheT PE=3 SV=1
TRINITY_DN126770_c0_g1_i1	1	SYFB	PSESMPhenylalanine--tRNA ligase beta subunit OS=Pseudomonas syringae pv. tomato (strain ATCC BAA-871 / DC3000) OX=223283 GN=pheT PE=3 SV=1
TRINITY_DN76640_c0_g1_i1	1	SYFB	METCAPhenylalanine--tRNA ligase beta subunit OS=Methylococcus capsulatus (strain ATCC 33009 / NCIMB 11132 / Bath) OX=243233 GN=pheT PE=3 SV=1
TRINITY_DN1447_c0_g1_i7	1	SYFAA	XENLAPhenylalanine--tRNA ligase alpha subunit A OS=Xenopus laevis OX=8355 GN=farsa-a PE=2 SV=1
TRINITY_DN2819_c1_g1_i6	1	SYF1	MOUSEPre-mRNA-splicing factor SYF1 OS=Mus musculus OX=10090 GN=Xab2 PE=1 SV=1
TRINITY_DN584_c1_g1_i27	1	SYEP	HUMANBifunctional glutamate/proline--tRNA ligase OS=Homo sapiens OX=9606 GN=EPRS PE=1 SV=5
TRINITY_DN584_c1_g1_i11	1	SYEP	CRIGRBifunctional glutamate/proline--tRNA ligase OS=Cricetulus griseus OX=10029 GN=EPRS PE=1 SV=3
TRINITY_DN4747_c0_g1_i1	1	SYE	SALRDGlutamate--tRNA ligase OS=Salinibacter ruber (strain DSM 13855 / M31) OX=309807 GN=gltX PE=3 SV=2
TRINITY_DN4747_c0_g1_i17	1	SYE	CHLCVGlutamate--tRNA ligase OS=Chlamydophila caviae (strain ATCC VR-813 / DSM 19441 / GPIC) OX=227941 GN=gltX PE=3 SV=1
TRINITY_DN131284_c0_g1_i1	1	SYDC	CAEELAspartate--tRNA ligase, cytoplasmic OS=Caenorhabditis elegans OX=6239 GN=dars-1 PE=3 SV=1
TRINITY_DN443_c0_g1_i63	1	SYDC	BOVINAspartate--tRNA ligase, cytoplasmic OS=Bos taurus OX=9913 GN=DARS PE=2 SV=1
TRINITY_DN443_c0_g1_i22	1	SYDC	BOVINAspartate--tRNA ligase, cytoplasmic OS=Bos taurus OX=9913 GN=DARS PE=2 SV=1
TRINITY_DN443_c0_g1_i71	1	SYDC	BOVINAspartate--tRNA ligase, cytoplasmic OS=Bos taurus OX=9913 GN=DARS PE=2 SV=1
TRINITY_DN1179_c0_g1_i75	1	SYCC	HUMANCysteine--tRNA ligase, cytoplasmic OS=Homo sapiens OX=9606 GN=CARS PE=1 SV=3
TRINITY_DN1311_c0_g1_i39	1	SYB1	SCHPOSynaptobrevin homolog 1 OS=Schizosaccharomyces pombe (strain 972 / ATCC 24843) OX=284812 GN=syb1 PE=3 SV=1
TRINITY_DN8630_c0_g1_i3	1	SYAM	MOUSEAlanine--tRNA ligase, mitochondrial OS=Mus musculus OX=10090 GN=Aars2 PE=1 SV=1
TRINITY_DN26659_c0_g1_i7	1	SYAC	BOMMOAlanine--tRNA ligase, cytoplasmic OS=Bombyx mori OX=7091 PE=1 SV=1
TRINITY_DN5_c4_g2_i9	1	SYAC	BOMMOAlanine--tRNA ligase, cytoplasmic OS=Bombyx mori OX=7091 PE=1 SV=1
TRINITY_DN6628_c0_g2_i2	1	SWT1	MOUSETranscriptional protein SWT1 OS=Mus musculus OX=10090 GN=Swt1 PE=2 SV=3
TRINITY_DN81142_c0_g1_i1	1	SWI5	ANOFIDNA repair protein SWI5 homolog OS=Anoplopoma fimbria OX=229290 GN=swi5 PE=2 SV=1
TRINITY_DN23298_c2_g1_i16	1	SWET1	DROMESugar transporter SWEET1 OS=Drosophila melanogaster OX=7227 GN=slv PE=2 SV=1
TRINITY_DN622_c0_g1_i17	1	SVOP	XENLASynaptic vesicle 2-related protein OS=Xenopus laevis OX=8355 GN=svop PE=2 SV=1
TRINITY_DN622_c0_g1_i22	1	SVOP	CAEELPutative transporter svop-1 OS=Caenorhabditis elegans OX=6239 GN=svop-1 PE=3 SV=5
TRINITY_DN622_c0_g1_i3	1	SVOP	CAEELPutative transporter svop-1 OS=Caenorhabditis elegans OX=6239 GN=svop-1 PE=3 SV=5
TRINITY_DN622_c0_g1_i4	1	SVOP	BOVINSynaptic vesicle 2-related protein OS=Bos taurus OX=9913 GN=SVOP PE=2 SV=1
TRINITY_DN1892_c0_g1_i14	1	SVKA	DICDISerine/threonine-protein kinase svkA OS=Dictyostelium discoideum OX=44689 GN=svkA PE=1 SV=1
TRINITY_DN1229_c0_g1_i14	1	SVEP1	RATSushi, von Willebrand factor type A, EGF and pentraxin domain-containing protein 1 OS=Rattus norvegicus OX=10116 GN=Svep1 PE=1 SV=1
TRINITY_DN19305_c2_g1_i1	1	SVEP1	RATSushi, von Willebrand factor type A, EGF and pentraxin domain-containing protein 1 OS=Rattus norvegicus OX=10116 GN=Svep1 PE=1 SV=1
TRINITY_DN12265_c0_g1_i4	1	SVEP1	RATSushi, von Willebrand factor type A, EGF and pentraxin domain-containing protein 1 OS=Rattus norvegicus OX=10116 GN=Svep1 PE=1 SV=1
TRINITY_DN12117_c0_g1_i13	1	SVEP1	RATSushi, von Willebrand factor type A, EGF and pentraxin domain-containing protein 1 OS=Rattus norvegicus OX=10116 GN=Svep1 PE=1 SV=1
TRINITY_DN1574_c0_g1_i4	1	SVEP1	RATSushi, von Willebrand factor type A, EGF and pentraxin domain-containing protein 1 OS=Rattus norvegicus OX=10116 GN=Svep1 PE=1 SV=1
TRINITY_DN29272_c0_g1_i7	1	SVEP1	RATSushi, von Willebrand factor type A, EGF and pentraxin domain-containing protein 1 OS=Rattus norvegicus OX=10116 GN=Svep1 PE=1 SV=1
TRINITY_DN19611_c1_g1_i1	1	SVEP1	RATSushi, von Willebrand factor type A, EGF and pentraxin domain-containing protein 1 OS=Rattus norvegicus OX=10116 GN=Svep1 PE=1 SV=1
TRINITY_DN15667_c0_g2_i7	1	SVEP1	RATSushi, von Willebrand factor type A, EGF and pentraxin domain-containing protein 1 OS=Rattus norvegicus OX=10116 GN=Svep1 PE=1 SV=1
TRINITY_DN56405_c1_g1_i4	1	SVEP1	RATSushi, von Willebrand factor type A, EGF and pentraxin domain-containing protein 1 OS=Rattus norvegicus OX=10116 GN=Svep1 PE=1 SV=1
TRINITY_DN13971_c0_g1_i18	1	SVEP1	RATSushi, von Willebrand factor type A, EGF and pentraxin domain-containing protein 1 OS=Rattus norvegicus OX=10116 GN=Svep1 PE=1 SV=1
TRINITY_DN6804_c0_g1_i1	1	SVEP1	RATSushi, von Willebrand factor type A, EGF and pentraxin domain-containing protein 1 OS=Rattus norvegicus OX=10116 GN=Svep1 PE=1 SV=1
TRINITY_DN21460_c0_g1_i1	1	SVEP1	RATSushi, von Willebrand factor type A, EGF and pentraxin domain-containing protein 1 OS=Rattus norvegicus OX=10116 GN=Svep1 PE=1 SV=1
TRINITY_DN8748_c0_g1_i13	1	SVEP1	RATSushi, von Willebrand factor type A, EGF and pentraxin domain-containing protein 1 OS=Rattus norvegicus OX=10116 GN=Svep1 PE=1 SV=1
TRINITY_DN1838_c0_g1_i33	1	SVEP1	RATSushi, von Willebrand factor type A, EGF and pentraxin domain-containing protein 1 OS=Rattus norvegicus OX=10116 GN=Svep1 PE=1 SV=1
TRINITY_DN7989_c0_g1_i9	1	SVEP1	RATSushi, von Willebrand factor type A, EGF and pentraxin domain-containing protein 1 OS=Rattus norvegicus OX=10116 GN=Svep1 PE=1 SV=1
TRINITY_DN11170_c0_g1_i4	1	SVEP1	RATSushi, von Willebrand factor type A, EGF and pentraxin domain-containing protein 1 OS=Rattus norvegicus OX=10116 GN=Svep1 PE=1 SV=1
TRINITY_DN240_c0_g1_i21	1	SVEP1	RATSushi, von Willebrand factor type A, EGF and pentraxin domain-containing protein 1 OS=Rattus norvegicus OX=10116 GN=Svep1 PE=1 SV=1
TRINITY_DN15335_c0_g1_i1	1	SVEP1	RATSushi, von Willebrand factor type A, EGF and pentraxin domain-containing protein 1 OS=Rattus norvegicus OX=10116 GN=Svep1 PE=1 SV=1
TRINITY_DN24737_c0_g3_i2	1	SVEP1	RATSushi, von Willebrand factor type A, EGF and pentraxin domain-containing protein 1 OS=Rattus norvegicus OX=10116 GN=Svep1 PE=1 SV=1
TRINITY_DN35793_c1_g1_i2	1	SVEP1	RATSushi, von Willebrand factor type A, EGF and pentraxin domain-containing protein 1 OS=Rattus norvegicus OX=10116 GN=Svep1 PE=1 SV=1
TRINITY_DN36347_c0_g1_i1	1	SVEP1	RATSushi, von Willebrand factor type A, EGF and pentraxin domain-containing protein 1 OS=Rattus norvegicus OX=10116 GN=Svep1 PE=1 SV=1
TRINITY_DN8748_c0_g1_i2	1	SVEP1	RATSushi, von Willebrand factor type A, EGF and pentraxin domain-containing protein 1 OS=Rattus norvegicus OX=10116 GN=Svep1 PE=1 SV=1
TRINITY_DN42582_c1_g2_i1	1	SVEP1	RATSushi, von Willebrand factor type A, EGF and pentraxin domain-containing protein 1 OS=Rattus norvegicus OX=10116 GN=Svep1 PE=1 SV=1
TRINITY_DN1876_c1_g1_i10	1	SVEP1	RATSushi, von Willebrand factor type A, EGF and pentraxin domain-containing protein 1 OS=Rattus norvegicus OX=10116 GN=Svep1 PE=1 SV=1
TRINITY_DN371_c1_g1_i9	1	SVEP1	RATSushi, von Willebrand factor type A, EGF and pentraxin domain-containing protein 1 OS=Rattus norvegicus OX=10116 GN=Svep1 PE=1 SV=1
TRINITY_DN3778_c0_g1_i2	1	SVEP1	RATSushi, von Willebrand factor type A, EGF and pentraxin domain-containing protein 1 OS=Rattus norvegicus OX=10116 GN=Svep1 PE=1 SV=1
TRINITY_DN12785_c0_g1_i9	1	SVEP1	RATSushi, von Willebrand factor type A, EGF and pentraxin domain-containing protein 1 OS=Rattus norvegicus OX=10116 GN=Svep1 PE=1 SV=1
TRINITY_DN45050_c0_g1_i5	1	SVEP1	RATSushi, von Willebrand factor type A, EGF and pentraxin domain-containing protein 1 OS=Rattus norvegicus OX=10116 GN=Svep1 PE=1 SV=1
TRINITY_DN4297_c0_g1_i19	1	SVEP1	RATSushi, von Willebrand factor type A, EGF and pentraxin domain-containing protein 1 OS=Rattus norvegicus OX=10116 GN=Svep1 PE=1 SV=1
TRINITY_DN3316_c0_g1_i48	1	SVEP1	RATSushi, von Willebrand factor type A, EGF and pentraxin domain-containing protein 1 OS=Rattus norvegicus OX=10116 GN=Svep1 PE=1 SV=1
TRINITY_DN17430_c3_g1_i1	1	SVEP1	RATSushi, von Willebrand factor type A, EGF and pentraxin domain-containing protein 1 OS=Rattus norvegicus OX=10116 GN=Svep1 PE=1 SV=1
TRINITY_DN10047_c1_g1_i3	1	SVEP1	RATSushi, von Willebrand factor type A, EGF and pentraxin domain-containing protein 1 OS=Rattus norvegicus OX=10116 GN=Svep1 PE=1 SV=1
TRINITY_DN19098_c0_g1_i1	1	SVEP1	RATSushi, von Willebrand factor type A, EGF and pentraxin domain-containing protein 1 OS=Rattus norvegicus OX=10116 GN=Svep1 PE=1 SV=1
TRINITY_DN15335_c0_g1_i3	1	SVEP1	RATSushi, von Willebrand factor type A, EGF and pentraxin domain-containing protein 1 OS=Rattus norvegicus OX=10116 GN=Svep1 PE=1 SV=1
TRINITY_DN11246_c2_g1_i1	1	SVEP1	RATSushi, von Willebrand factor type A, EGF and pentraxin domain-containing protein 1 OS=Rattus norvegicus OX=10116 GN=Svep1 PE=1 SV=1
TRINITY_DN859_c0_g1_i65	1	SVEP1	RATSushi, von Willebrand factor type A, EGF and pentraxin domain-containing protein 1 OS=Rattus norvegicus OX=10116 GN=Svep1 PE=1 SV=1
TRINITY_DN47097_c0_g1_i2	1	SVEP1	RATSushi, von Willebrand factor type A, EGF and pentraxin domain-containing protein 1 OS=Rattus norvegicus OX=10116 GN=Svep1 PE=1 SV=1
TRINITY_DN2660_c0_g1_i67	1	SVEP1	RATSushi, von Willebrand factor type A, EGF and pentraxin domain-containing protein 1 OS=Rattus norvegicus OX=10116 GN=Svep1 PE=1 SV=1
TRINITY_DN12117_c0_g1_i2	1	SVEP1	RATSushi, von Willebrand factor type A, EGF and pentraxin domain-containing protein 1 OS=Rattus norvegicus OX=10116 GN=Svep1 PE=1 SV=1
TRINITY_DN4615_c2_g1_i1	1	SVEP1	RATSushi, von Willebrand factor type A, EGF and pentraxin domain-containing protein 1 OS=Rattus norvegicus OX=10116 GN=Svep1 PE=1 SV=1
TRINITY_DN9042_c6_g1_i1	1	SVEP1	RATSushi, von Willebrand factor type A, EGF and pentraxin domain-containing protein 1 OS=Rattus norvegicus OX=10116 GN=Svep1 PE=1 SV=1
TRINITY_DN13116_c0_g1_i3	1	SVEP1	RATSushi, von Willebrand factor type A, EGF and pentraxin domain-containing protein 1 OS=Rattus norvegicus OX=10116 GN=Svep1 PE=1 SV=1
TRINITY_DN15667_c0_g2_i13	1	SVEP1	RATSushi, von Willebrand factor type A, EGF and pentraxin domain-containing protein 1 OS=Rattus norvegicus OX=10116 GN=Svep1 PE=1 SV=1
TRINITY_DN11170_c0_g1_i2	1	SVEP1	RATSushi, von Willebrand factor type A, EGF and pentraxin domain-containing protein 1 OS=Rattus norvegicus OX=10116 GN=Svep1 PE=1 SV=1
TRINITY_DN5848_c0_g1_i6	1	SVEP1	RATSushi, von Willebrand factor type A, EGF and pentraxin domain-containing protein 1 OS=Rattus norvegicus OX=10116 GN=Svep1 PE=1 SV=1
TRINITY_DN8748_c0_g1_i18	1	SVEP1	RATSushi, von Willebrand factor type A, EGF and pentraxin domain-containing protein 1 OS=Rattus norvegicus OX=10116 GN=Svep1 PE=1 SV=1
TRINITY_DN15664_c2_g1_i1	1	SVEP1	RATSushi, von Willebrand factor type A, EGF and pentraxin domain-containing protein 1 OS=Rattus norvegicus OX=10116 GN=Svep1 PE=1 SV=1
TRINITY_DN7820_c0_g1_i15	1	SVEP1	RATSushi, von Willebrand factor type A, EGF and pentraxin domain-containing protein 1 OS=Rattus norvegicus OX=10116 GN=Svep1 PE=1 SV=1
TRINITY_DN56405_c1_g1_i1	1	SVEP1	RATSushi, von Willebrand factor type A, EGF and pentraxin domain-containing protein 1 OS=Rattus norvegicus OX=10116 GN=Svep1 PE=1 SV=1
TRINITY_DN31557_c0_g2_i1	1	SVEP1	RATSushi, von Willebrand factor type A, EGF and pentraxin domain-containing protein 1 OS=Rattus norvegicus OX=10116 GN=Svep1 PE=1 SV=1
TRINITY_DN30860_c0_g1_i10	1	SVEP1	RATSushi, von Willebrand factor type A, EGF and pentraxin domain-containing protein 1 OS=Rattus norvegicus OX=10116 GN=Svep1 PE=1 SV=1
TRINITY_DN43163_c0_g1_i2	1	SVEP1	RATSushi, von Willebrand factor type A, EGF and pentraxin domain-containing protein 1 OS=Rattus norvegicus OX=10116 GN=Svep1 PE=1 SV=1
TRINITY_DN1876_c0_g1_i9	1	SVEP1	RATSushi, von Willebrand factor type A, EGF and pentraxin domain-containing protein 1 OS=Rattus norvegicus OX=10116 GN=Svep1 PE=1 SV=1
TRINITY_DN5016_c0_g1_i22	1	SVEP1	RATSushi, von Willebrand factor type A, EGF and pentraxin domain-containing protein 1 OS=Rattus norvegicus OX=10116 GN=Svep1 PE=1 SV=1
TRINITY_DN7802_c0_g1_i8	1	SVEP1	RATSushi, von Willebrand factor type A, EGF and pentraxin domain-containing protein 1 OS=Rattus norvegicus OX=10116 GN=Svep1 PE=1 SV=1
TRINITY_DN8717_c0_g1_i27	1	SVEP1	RATSushi, von Willebrand factor type A, EGF and pentraxin domain-containing protein 1 OS=Rattus norvegicus OX=10116 GN=Svep1 PE=1 SV=1
TRINITY_DN27168_c0_g1_i1	1	SVEP1	RATSushi, von Willebrand factor type A, EGF and pentraxin domain-containing protein 1 OS=Rattus norvegicus OX=10116 GN=Svep1 PE=1 SV=1
TRINITY_DN5476_c1_g1_i2	1	SVEP1	RATSushi, von Willebrand factor type A, EGF and pentraxin domain-containing protein 1 OS=Rattus norvegicus OX=10116 GN=Svep1 PE=1 SV=1
TRINITY_DN54_c0_g1_i7	1	SVEP1	RATSushi, von Willebrand factor type A, EGF and pentraxin domain-containing protein 1 OS=Rattus norvegicus OX=10116 GN=Svep1 PE=1 SV=1
TRINITY_DN24934_c0_g2_i1	1	SVEP1	RATSushi, von Willebrand factor type A, EGF and pentraxin domain-containing protein 1 OS=Rattus norvegicus OX=10116 GN=Svep1 PE=1 SV=1
TRINITY_DN8748_c0_g1_i7	1	SVEP1	RATSushi, von Willebrand factor type A, EGF and pentraxin domain-containing protein 1 OS=Rattus norvegicus OX=10116 GN=Svep1 PE=1 SV=1
TRINITY_DN3778_c0_g1_i18	1	SVEP1	RATSushi, von Willebrand factor type A, EGF and pentraxin domain-containing protein 1 OS=Rattus norvegicus OX=10116 GN=Svep1 PE=1 SV=1
TRINITY_DN15351_c0_g2_i3	1	SVEP1	RATSushi, von Willebrand factor type A, EGF and pentraxin domain-containing protein 1 OS=Rattus norvegicus OX=10116 GN=Svep1 PE=1 SV=1
TRINITY_DN11170_c0_g1_i1	1	SVEP1	RATSushi, von Willebrand factor type A, EGF and pentraxin domain-containing protein 1 OS=Rattus norvegicus OX=10116 GN=Svep1 PE=1 SV=1
TRINITY_DN15789_c0_g2_i3	1	SVEP1	MOUSESushi, von Willebrand factor type A, EGF and pentraxin domain-containing protein 1 OS=Mus musculus OX=10090 GN=Svep1 PE=1 SV=1
TRINITY_DN1400_c0_g1_i37	1	SVEP1	MOUSESushi, von Willebrand factor type A, EGF and pentraxin domain-containing protein 1 OS=Mus musculus OX=10090 GN=Svep1 PE=1 SV=1
TRINITY_DN15351_c0_g2_i2	1	SVEP1	MOUSESushi, von Willebrand factor type A, EGF and pentraxin domain-containing protein 1 OS=Mus musculus OX=10090 GN=Svep1 PE=1 SV=1
TRINITY_DN14757_c0_g1_i16	1	SVEP1	MOUSESushi, von Willebrand factor type A, EGF and pentraxin domain-containing protein 1 OS=Mus musculus OX=10090 GN=Svep1 PE=1 SV=1
TRINITY_DN16447_c0_g1_i5	1	SVEP1	MOUSESushi, von Willebrand factor type A, EGF and pentraxin domain-containing protein 1 OS=Mus musculus OX=10090 GN=Svep1 PE=1 SV=1
TRINITY_DN10215_c0_g1_i1	1	SVEP1	MOUSESushi, von Willebrand factor type A, EGF and pentraxin domain-containing protein 1 OS=Mus musculus OX=10090 GN=Svep1 PE=1 SV=1
TRINITY_DN1869_c0_g1_i23	1	SVEP1	MOUSESushi, von Willebrand factor type A, EGF and pentraxin domain-containing protein 1 OS=Mus musculus OX=10090 GN=Svep1 PE=1 SV=1
TRINITY_DN8532_c0_g1_i41	1	SVEP1	MOUSESushi, von Willebrand factor type A, EGF and pentraxin domain-containing protein 1 OS=Mus musculus OX=10090 GN=Svep1 PE=1 SV=1
TRINITY_DN3021_c0_g1_i3	1	SVEP1	MOUSESushi, von Willebrand factor type A, EGF and pentraxin domain-containing protein 1 OS=Mus musculus OX=10090 GN=Svep1 PE=1 SV=1
TRINITY_DN1537_c0_g1_i4	1	SVEP1	MOUSESushi, von Willebrand factor type A, EGF and pentraxin domain-containing protein 1 OS=Mus musculus OX=10090 GN=Svep1 PE=1 SV=1
TRINITY_DN6035_c0_g1_i6	1	SVEP1	MOUSESushi, von Willebrand factor type A, EGF and pentraxin domain-containing protein 1 OS=Mus musculus OX=10090 GN=Svep1 PE=1 SV=1
TRINITY_DN4375_c0_g1_i5	1	SVEP1	MOUSESushi, von Willebrand factor type A, EGF and pentraxin domain-containing protein 1 OS=Mus musculus OX=10090 GN=Svep1 PE=1 SV=1
TRINITY_DN20390_c0_g1_i13	1	SVEP1	MOUSESushi, von Willebrand factor type A, EGF and pentraxin domain-containing protein 1 OS=Mus musculus OX=10090 GN=Svep1 PE=1 SV=1
TRINITY_DN16447_c0_g1_i6	1	SVEP1	MOUSESushi, von Willebrand factor type A, EGF and pentraxin domain-containing protein 1 OS=Mus musculus OX=10090 GN=Svep1 PE=1 SV=1
TRINITY_DN3316_c0_g1_i1	1	SVEP1	MOUSESushi, von Willebrand factor type A, EGF and pentraxin domain-containing protein 1 OS=Mus musculus OX=10090 GN=Svep1 PE=1 SV=1
TRINITY_DN8532_c0_g1_i5	1	SVEP1	MOUSESushi, von Willebrand factor type A, EGF and pentraxin domain-containing protein 1 OS=Mus musculus OX=10090 GN=Svep1 PE=1 SV=1
TRINITY_DN6637_c0_g2_i4	1	SVEP1	MOUSESushi, von Willebrand factor type A, EGF and pentraxin domain-containing protein 1 OS=Mus musculus OX=10090 GN=Svep1 PE=1 SV=1
TRINITY_DN11224_c0_g1_i11	1	SVEP1	MOUSESushi, von Willebrand factor type A, EGF and pentraxin domain-containing protein 1 OS=Mus musculus OX=10090 GN=Svep1 PE=1 SV=1
TRINITY_DN8057_c1_g1_i1	1	SVEP1	MOUSESushi, von Willebrand factor type A, EGF and pentraxin domain-containing protein 1 OS=Mus musculus OX=10090 GN=Svep1 PE=1 SV=1
TRINITY_DN9341_c0_g1_i14	1	SVEP1	MOUSESushi, von Willebrand factor type A, EGF and pentraxin domain-containing protein 1 OS=Mus musculus OX=10090 GN=Svep1 PE=1 SV=1
TRINITY_DN24390_c0_g1_i16	1	SVEP1	MOUSESushi, von Willebrand factor type A, EGF and pentraxin domain-containing protein 1 OS=Mus musculus OX=10090 GN=Svep1 PE=1 SV=1
TRINITY_DN2177_c0_g1_i1	1	SVEP1	MOUSESushi, von Willebrand factor type A, EGF and pentraxin domain-containing protein 1 OS=Mus musculus OX=10090 GN=Svep1 PE=1 SV=1
TRINITY_DN11097_c0_g1_i1	1	SVEP1	MOUSESushi, von Willebrand factor type A, EGF and pentraxin domain-containing protein 1 OS=Mus musculus OX=10090 GN=Svep1 PE=1 SV=1
TRINITY_DN12785_c0_g1_i18	1	SVEP1	MOUSESushi, von Willebrand factor type A, EGF and pentraxin domain-containing protein 1 OS=Mus musculus OX=10090 GN=Svep1 PE=1 SV=1
TRINITY_DN859_c1_g1_i6	1	SVEP1	MOUSESushi, von Willebrand factor type A, EGF and pentraxin domain-containing protein 1 OS=Mus musculus OX=10090 GN=Svep1 PE=1 SV=1
TRINITY_DN9042_c1_g1_i3	1	SVEP1	MOUSESushi, von Willebrand factor type A, EGF and pentraxin domain-containing protein 1 OS=Mus musculus OX=10090 GN=Svep1 PE=1 SV=1
TRINITY_DN12006_c0_g1_i20	1	SVEP1	MOUSESushi, von Willebrand factor type A, EGF and pentraxin domain-containing protein 1 OS=Mus musculus OX=10090 GN=Svep1 PE=1 SV=1
TRINITY_DN2553_c2_g1_i7	1	SVEP1	MOUSESushi, von Willebrand factor type A, EGF and pentraxin domain-containing protein 1 OS=Mus musculus OX=10090 GN=Svep1 PE=1 SV=1
TRINITY_DN7820_c0_g1_i13	1	SVEP1	MOUSESushi, von Willebrand factor type A, EGF and pentraxin domain-containing protein 1 OS=Mus musculus OX=10090 GN=Svep1 PE=1 SV=1
TRINITY_DN15351_c0_g2_i1	1	SVEP1	MOUSESushi, von Willebrand factor type A, EGF and pentraxin domain-containing protein 1 OS=Mus musculus OX=10090 GN=Svep1 PE=1 SV=1
TRINITY_DN41535_c0_g1_i11	1	SVEP1	MOUSESushi, von Willebrand factor type A, EGF and pentraxin domain-containing protein 1 OS=Mus musculus OX=10090 GN=Svep1 PE=1 SV=1
TRINITY_DN41535_c0_g1_i10	1	SVEP1	MOUSESushi, von Willebrand factor type A, EGF and pentraxin domain-containing protein 1 OS=Mus musculus OX=10090 GN=Svep1 PE=1 SV=1
TRINITY_DN1537_c0_g1_i10	1	SVEP1	MOUSESushi, von Willebrand factor type A, EGF and pentraxin domain-containing protein 1 OS=Mus musculus OX=10090 GN=Svep1 PE=1 SV=1
TRINITY_DN22684_c0_g1_i9	1	SVEP1	MOUSESushi, von Willebrand factor type A, EGF and pentraxin domain-containing protein 1 OS=Mus musculus OX=10090 GN=Svep1 PE=1 SV=1
TRINITY_DN422_c0_g1_i1	1	SVEP1	MOUSESushi, von Willebrand factor type A, EGF and pentraxin domain-containing protein 1 OS=Mus musculus OX=10090 GN=Svep1 PE=1 SV=1
TRINITY_DN2913_c0_g1_i9	1	SVEP1	MOUSESushi, von Willebrand factor type A, EGF and pentraxin domain-containing protein 1 OS=Mus musculus OX=10090 GN=Svep1 PE=1 SV=1
TRINITY_DN40287_c0_g1_i2	1	SVEP1	MOUSESushi, von Willebrand factor type A, EGF and pentraxin domain-containing protein 1 OS=Mus musculus OX=10090 GN=Svep1 PE=1 SV=1
TRINITY_DN24827_c0_g1_i9	1	SVEP1	MOUSESushi, von Willebrand factor type A, EGF and pentraxin domain-containing protein 1 OS=Mus musculus OX=10090 GN=Svep1 PE=1 SV=1
TRINITY_DN7395_c1_g1_i10	1	SVEP1	MOUSESushi, von Willebrand factor type A, EGF and pentraxin domain-containing protein 1 OS=Mus musculus OX=10090 GN=Svep1 PE=1 SV=1
TRINITY_DN38747_c0_g1_i2	1	SVEP1	MOUSESushi, von Willebrand factor type A, EGF and pentraxin domain-containing protein 1 OS=Mus musculus OX=10090 GN=Svep1 PE=1 SV=1
TRINITY_DN28924_c0_g2_i1	1	SVEP1	MOUSESushi, von Willebrand factor type A, EGF and pentraxin domain-containing protein 1 OS=Mus musculus OX=10090 GN=Svep1 PE=1 SV=1
TRINITY_DN9855_c0_g1_i2	1	SVEP1	MOUSESushi, von Willebrand factor type A, EGF and pentraxin domain-containing protein 1 OS=Mus musculus OX=10090 GN=Svep1 PE=1 SV=1
TRINITY_DN859_c0_g1_i9	1	SVEP1	MOUSESushi, von Willebrand factor type A, EGF and pentraxin domain-containing protein 1 OS=Mus musculus OX=10090 GN=Svep1 PE=1 SV=1
TRINITY_DN21842_c0_g1_i1	1	SVEP1	MOUSESushi, von Willebrand factor type A, EGF and pentraxin domain-containing protein 1 OS=Mus musculus OX=10090 GN=Svep1 PE=1 SV=1
TRINITY_DN6035_c0_g1_i4	1	SVEP1	MOUSESushi, von Willebrand factor type A, EGF and pentraxin domain-containing protein 1 OS=Mus musculus OX=10090 GN=Svep1 PE=1 SV=1
TRINITY_DN998_c0_g1_i24	1	SVEP1	MOUSESushi, von Willebrand factor type A, EGF and pentraxin domain-containing protein 1 OS=Mus musculus OX=10090 GN=Svep1 PE=1 SV=1
TRINITY_DN9303_c0_g1_i11	1	SVEP1	MOUSESushi, von Willebrand factor type A, EGF and pentraxin domain-containing protein 1 OS=Mus musculus OX=10090 GN=Svep1 PE=1 SV=1
TRINITY_DN24390_c0_g1_i18	1	SVEP1	MOUSESushi, von Willebrand factor type A, EGF and pentraxin domain-containing protein 1 OS=Mus musculus OX=10090 GN=Svep1 PE=1 SV=1
TRINITY_DN23146_c0_g1_i1	1	SVEP1	MOUSESushi, von Willebrand factor type A, EGF and pentraxin domain-containing protein 1 OS=Mus musculus OX=10090 GN=Svep1 PE=1 SV=1
TRINITY_DN11291_c0_g1_i13	1	SVEP1	MOUSESushi, von Willebrand factor type A, EGF and pentraxin domain-containing protein 1 OS=Mus musculus OX=10090 GN=Svep1 PE=1 SV=1
TRINITY_DN6089_c0_g1_i4	1	SVEP1	MOUSESushi, von Willebrand factor type A, EGF and pentraxin domain-containing protein 1 OS=Mus musculus OX=10090 GN=Svep1 PE=1 SV=1
TRINITY_DN12877_c1_g1_i1	1	SVEP1	MOUSESushi, von Willebrand factor type A, EGF and pentraxin domain-containing protein 1 OS=Mus musculus OX=10090 GN=Svep1 PE=1 SV=1
TRINITY_DN21517_c0_g1_i6	1	SVEP1	MOUSESushi, von Willebrand factor type A, EGF and pentraxin domain-containing protein 1 OS=Mus musculus OX=10090 GN=Svep1 PE=1 SV=1
TRINITY_DN1400_c0_g1_i41	1	SVEP1	MOUSESushi, von Willebrand factor type A, EGF and pentraxin domain-containing protein 1 OS=Mus musculus OX=10090 GN=Svep1 PE=1 SV=1
TRINITY_DN19485_c4_g1_i1	1	SVEP1	MOUSESushi, von Willebrand factor type A, EGF and pentraxin domain-containing protein 1 OS=Mus musculus OX=10090 GN=Svep1 PE=1 SV=1
TRINITY_DN11291_c0_g1_i2	1	SVEP1	MOUSESushi, von Willebrand factor type A, EGF and pentraxin domain-containing protein 1 OS=Mus musculus OX=10090 GN=Svep1 PE=1 SV=1
TRINITY_DN36347_c0_g1_i4	1	SVEP1	MOUSESushi, von Willebrand factor type A, EGF and pentraxin domain-containing protein 1 OS=Mus musculus OX=10090 GN=Svep1 PE=1 SV=1
TRINITY_DN12785_c0_g1_i7	1	SVEP1	MOUSESushi, von Willebrand factor type A, EGF and pentraxin domain-containing protein 1 OS=Mus musculus OX=10090 GN=Svep1 PE=1 SV=1
TRINITY_DN1876_c0_g1_i11	1	SVEP1	MOUSESushi, von Willebrand factor type A, EGF and pentraxin domain-containing protein 1 OS=Mus musculus OX=10090 GN=Svep1 PE=1 SV=1
TRINITY_DN8792_c5_g1_i7	1	SVEP1	MOUSESushi, von Willebrand factor type A, EGF and pentraxin domain-containing protein 1 OS=Mus musculus OX=10090 GN=Svep1 PE=1 SV=1
TRINITY_DN8748_c0_g1_i3	1	SVEP1	MOUSESushi, von Willebrand factor type A, EGF and pentraxin domain-containing protein 1 OS=Mus musculus OX=10090 GN=Svep1 PE=1 SV=1
TRINITY_DN42323_c0_g1_i9	1	SVEP1	MOUSESushi, von Willebrand factor type A, EGF and pentraxin domain-containing protein 1 OS=Mus musculus OX=10090 GN=Svep1 PE=1 SV=1
TRINITY_DN22684_c0_g1_i3	1	SVEP1	MOUSESushi, von Willebrand factor type A, EGF and pentraxin domain-containing protein 1 OS=Mus musculus OX=10090 GN=Svep1 PE=1 SV=1
TRINITY_DN7750_c0_g1_i37	1	SVEP1	MOUSESushi, von Willebrand factor type A, EGF and pentraxin domain-containing protein 1 OS=Mus musculus OX=10090 GN=Svep1 PE=1 SV=1
TRINITY_DN18676_c0_g3_i1	1	SVEP1	MOUSESushi, von Willebrand factor type A, EGF and pentraxin domain-containing protein 1 OS=Mus musculus OX=10090 GN=Svep1 PE=1 SV=1
TRINITY_DN1677_c0_g1_i2	1	SVEP1	MOUSESushi, von Willebrand factor type A, EGF and pentraxin domain-containing protein 1 OS=Mus musculus OX=10090 GN=Svep1 PE=1 SV=1
TRINITY_DN14432_c0_g1_i5	1	SVEP1	MOUSESushi, von Willebrand factor type A, EGF and pentraxin domain-containing protein 1 OS=Mus musculus OX=10090 GN=Svep1 PE=1 SV=1
TRINITY_DN1537_c0_g1_i41	1	SVEP1	MOUSESushi, von Willebrand factor type A, EGF and pentraxin domain-containing protein 1 OS=Mus musculus OX=10090 GN=Svep1 PE=1 SV=1
TRINITY_DN16338_c0_g1_i1	1	SVEP1	MOUSESushi, von Willebrand factor type A, EGF and pentraxin domain-containing protein 1 OS=Mus musculus OX=10090 GN=Svep1 PE=1 SV=1
TRINITY_DN8532_c0_g1_i16	1	SVEP1	MOUSESushi, von Willebrand factor type A, EGF and pentraxin domain-containing protein 1 OS=Mus musculus OX=10090 GN=Svep1 PE=1 SV=1
TRINITY_DN2238_c0_g1_i7	1	SVEP1	MOUSESushi, von Willebrand factor type A, EGF and pentraxin domain-containing protein 1 OS=Mus musculus OX=10090 GN=Svep1 PE=1 SV=1
TRINITY_DN608_c5_g1_i17	1	SVEP1	MOUSESushi, von Willebrand factor type A, EGF and pentraxin domain-containing protein 1 OS=Mus musculus OX=10090 GN=Svep1 PE=1 SV=1
[truncated: 8,891 more rows]

## Sheet: C2
Contig	Cluster
TRINITY_DN1526_c0_g1_i19	2	ZZEF1	HUMANZinc finger ZZ-type and EF-hand domain-containing protein 1 OS=Homo sapiens OX=9606 GN=ZZEF1 PE=1 SV=6
TRINITY_DN13611_c0_g1_i70	2	ZSWM3	MOUSEZinc finger SWIM domain-containing protein 3 OS=Mus musculus OX=10090 GN=Zswim3 PE=2 SV=1
TRINITY_DN3567_c0_g2_i4	2	ZSWM2	MOUSEE3 ubiquitin-protein ligase Zswim2 OS=Mus musculus OX=10090 GN=Zswim2 PE=1 SV=1
TRINITY_DN6790_c0_g2_i6	2	ZSC16	HUMANZinc finger and SCAN domain-containing protein 16 OS=Homo sapiens OX=9606 GN=ZSCAN16 PE=1 SV=2
TRINITY_DN165_c1_g1_i11	2	ZSC16	HUMANZinc finger and SCAN domain-containing protein 16 OS=Homo sapiens OX=9606 GN=ZSCAN16 PE=1 SV=2
TRINITY_DN45695_c0_g1_i1	2	ZRAN1	BOVINUbiquitin thioesterase ZRANB1 OS=Bos taurus OX=9913 GN=ZRANB1 PE=1 SV=1
TRINITY_DN16653_c0_g1_i15	2	ZRAB2	CHICKZinc finger Ran-binding domain-containing protein 2 OS=Gallus gallus OX=9031 GN=ZRANB2 PE=2 SV=1
TRINITY_DN2590_c0_g1_i17	2	ZPR1	BOVINZinc finger protein ZPR1 OS=Bos taurus OX=9913 GN=ZNF259 PE=2 SV=1
TRINITY_DN1378_c0_g1_i23	2	ZP3R	CAVPOZona pellucida sperm-binding protein 3 receptor OS=Cavia porcellus OX=10141 GN=ZP3R PE=1 SV=1
TRINITY_DN33489_c0_g1_i2	2	ZP3R	CAVPOZona pellucida sperm-binding protein 3 receptor OS=Cavia porcellus OX=10141 GN=ZP3R PE=1 SV=1
TRINITY_DN33489_c0_g1_i1	2	ZP3R	CAVPOZona pellucida sperm-binding protein 3 receptor OS=Cavia porcellus OX=10141 GN=ZP3R PE=1 SV=1
TRINITY_DN1378_c0_g1_i13	2	ZP3R	CAVPOZona pellucida sperm-binding protein 3 receptor OS=Cavia porcellus OX=10141 GN=ZP3R PE=1 SV=1
TRINITY_DN34645_c0_g1_i1	2	ZP3R	CAVPOZona pellucida sperm-binding protein 3 receptor OS=Cavia porcellus OX=10141 GN=ZP3R PE=1 SV=1
TRINITY_DN34645_c0_g1_i5	2	ZP3R	CAVPOZona pellucida sperm-binding protein 3 receptor OS=Cavia porcellus OX=10141 GN=ZP3R PE=1 SV=1
TRINITY_DN34645_c0_g1_i2	2	ZP3R	CAVPOZona pellucida sperm-binding protein 3 receptor OS=Cavia porcellus OX=10141 GN=ZP3R PE=1 SV=1
TRINITY_DN13581_c0_g1_i24	2	ZO3	HUMANTight junction protein ZO-3 OS=Homo sapiens OX=9606 GN=TJP3 PE=1 SV=3
TRINITY_DN2307_c0_g1_i104	2	ZNT9	DANREZinc transporter 9 OS=Danio rerio OX=7955 GN=slc30a9 PE=2 SV=1
TRINITY_DN9458_c0_g1_i8	2	ZNT6	CHICKZinc transporter 6 OS=Gallus gallus OX=9031 GN=SLC30A6 PE=1 SV=1
TRINITY_DN24243_c0_g1_i40	2	ZNT2	MOUSEZinc transporter 2 OS=Mus musculus OX=10090 GN=Slc30a2 PE=1 SV=1
TRINITY_DN20532_c0_g1_i3	2	ZNRF2	MOUSEE3 ubiquitin-protein ligase ZNRF2 OS=Mus musculus OX=10090 GN=Znrf2 PE=1 SV=1
TRINITY_DN20532_c0_g1_i8	2	ZNRF2	HUMANE3 ubiquitin-protein ligase ZNRF2 OS=Homo sapiens OX=9606 GN=ZNRF2 PE=1 SV=1
TRINITY_DN239_c0_g1_i23	2	ZNHI2	MOUSEZinc finger HIT domain-containing protein 2 OS=Mus musculus OX=10090 GN=Znhit2 PE=2 SV=2
TRINITY_DN239_c0_g1_i8	2	ZNHI2	MOUSEZinc finger HIT domain-containing protein 2 OS=Mus musculus OX=10090 GN=Znhit2 PE=2 SV=2
TRINITY_DN239_c0_g1_i4	2	ZNHI2	MOUSEZinc finger HIT domain-containing protein 2 OS=Mus musculus OX=10090 GN=Znhit2 PE=2 SV=2
TRINITY_DN27326_c0_g1_i1	2	ZNFX1	MOUSENFX1-type zinc finger-containing protein 1 OS=Mus musculus OX=10090 GN=Znfx1 PE=1 SV=3
TRINITY_DN1266_c0_g1_i26	2	ZNFX1	MOUSENFX1-type zinc finger-containing protein 1 OS=Mus musculus OX=10090 GN=Znfx1 PE=1 SV=3
TRINITY_DN1266_c0_g1_i6	2	ZNFX1	MOUSENFX1-type zinc finger-containing protein 1 OS=Mus musculus OX=10090 GN=Znfx1 PE=1 SV=3
TRINITY_DN23900_c0_g1_i14	2	ZNFX1	MOUSENFX1-type zinc finger-containing protein 1 OS=Mus musculus OX=10090 GN=Znfx1 PE=1 SV=3
TRINITY_DN23900_c0_g1_i11	2	ZNFX1	MOUSENFX1-type zinc finger-containing protein 1 OS=Mus musculus OX=10090 GN=Znfx1 PE=1 SV=3
TRINITY_DN36666_c0_g1_i8	2	ZNFX1	MOUSENFX1-type zinc finger-containing protein 1 OS=Mus musculus OX=10090 GN=Znfx1 PE=1 SV=3
TRINITY_DN41304_c0_g1_i1	2	ZNFX1	MOUSENFX1-type zinc finger-containing protein 1 OS=Mus musculus OX=10090 GN=Znfx1 PE=1 SV=3
TRINITY_DN23900_c0_g1_i6	2	ZNFX1	MOUSENFX1-type zinc finger-containing protein 1 OS=Mus musculus OX=10090 GN=Znfx1 PE=1 SV=3
TRINITY_DN4201_c0_g1_i5	2	ZNFX1	HUMANNFX1-type zinc finger-containing protein 1 OS=Homo sapiens OX=9606 GN=ZNFX1 PE=2 SV=2
TRINITY_DN5170_c0_g1_i4	2	ZNFX1	HUMANNFX1-type zinc finger-containing protein 1 OS=Homo sapiens OX=9606 GN=ZNFX1 PE=2 SV=2
TRINITY_DN4201_c0_g1_i7	2	ZNFX1	HUMANNFX1-type zinc finger-containing protein 1 OS=Homo sapiens OX=9606 GN=ZNFX1 PE=2 SV=2
TRINITY_DN10077_c0_g2_i1	2	ZNFX1	HUMANNFX1-type zinc finger-containing protein 1 OS=Homo sapiens OX=9606 GN=ZNFX1 PE=2 SV=2
TRINITY_DN4071_c0_g1_i8	2	ZNFX1	CAEELNFX1-type zinc finger-containing protein 1 homolog OS=Caenorhabditis elegans OX=6239 GN=znfx-1 PE=1 SV=1
TRINITY_DN43149_c0_g1_i7	2	ZN862	HUMANZinc finger protein 862 OS=Homo sapiens OX=9606 GN=ZNF862 PE=2 SV=2
TRINITY_DN2863_c0_g1_i3	2	ZN830	XENLAZinc finger protein 830 OS=Xenopus laevis OX=8355 GN=znf830 PE=2 SV=1
TRINITY_DN11997_c0_g2_i6	2	ZN608	MOUSEZinc finger protein 608 OS=Mus musculus OX=10090 GN=Znf608 PE=1 SV=1
TRINITY_DN514_c0_g1_i15	2	ZN598	HUMANE3 ubiquitin-protein ligase ZNF598 OS=Homo sapiens OX=9606 GN=ZNF598 PE=1 SV=1
TRINITY_DN22926_c0_g2_i1	2	ZN397	BOVINZinc finger protein 397 OS=Bos taurus OX=9913 GN=ZNF397 PE=2 SV=1
TRINITY_DN8786_c0_g1_i9	2	ZN330	MOUSEZinc finger protein 330 OS=Mus musculus OX=10090 GN=Znf330 PE=1 SV=1
TRINITY_DN6790_c0_g2_i3	2	ZN232	HUMANZinc finger protein 232 OS=Homo sapiens OX=9606 GN=ZNF232 PE=1 SV=1
TRINITY_DN2224_c1_g1_i26	2	ZN207	XENLABUB3-interacting and GLEBS motif-containing protein ZNF207 OS=Xenopus laevis OX=8355 GN=znf207 PE=1 SV=1
TRINITY_DN2224_c1_g1_i12	2	ZN207	XENLABUB3-interacting and GLEBS motif-containing protein ZNF207 OS=Xenopus laevis OX=8355 GN=znf207 PE=1 SV=1
TRINITY_DN10064_c4_g1_i3	2	ZMYM4	HUMANZinc finger MYM-type protein 4 OS=Homo sapiens OX=9606 GN=ZMYM4 PE=1 SV=1
TRINITY_DN5792_c0_g1_i14	2	ZMYM3	MOUSEZinc finger MYM-type protein 3 OS=Mus musculus OX=10090 GN=Zmym3 PE=1 SV=1
TRINITY_DN5792_c0_g1_i10	2	ZMYM3	MOUSEZinc finger MYM-type protein 3 OS=Mus musculus OX=10090 GN=Zmym3 PE=1 SV=1
TRINITY_DN18161_c0_g1_i3	2	ZMYM2	MOUSEZinc finger MYM-type protein 2 OS=Mus musculus OX=10090 GN=Zmym2 PE=1 SV=3
TRINITY_DN18161_c0_g1_i4	2	ZMYM2	MOUSEZinc finger MYM-type protein 2 OS=Mus musculus OX=10090 GN=Zmym2 PE=1 SV=3
TRINITY_DN20507_c0_g1_i10	2	ZMYM2	HUMANZinc finger MYM-type protein 2 OS=Homo sapiens OX=9606 GN=ZMYM2 PE=1 SV=1
TRINITY_DN18075_c3_g1_i1	2	ZMYM1	HUMANZinc finger MYM-type protein 1 OS=Homo sapiens OX=9606 GN=ZMYM1 PE=1 SV=1
TRINITY_DN8644_c1_g1_i1	2	ZMYM1	HUMANZinc finger MYM-type protein 1 OS=Homo sapiens OX=9606 GN=ZMYM1 PE=1 SV=1
TRINITY_DN17554_c0_g1_i8	2	ZMIZ1	HUMANZinc finger MIZ domain-containing protein 1 OS=Homo sapiens OX=9606 GN=ZMIZ1 PE=1 SV=3
TRINITY_DN3245_c0_g1_i36	2	ZIFL1	ARATHProtein ZINC INDUCED FACILITATOR-LIKE 1 OS=Arabidopsis thaliana OX=3702 GN=ZIFL1 PE=2 SV=1
TRINITY_DN1028_c0_g1_i10	2	ZIFL1	ARATHProtein ZINC INDUCED FACILITATOR-LIKE 1 OS=Arabidopsis thaliana OX=3702 GN=ZIFL1 PE=2 SV=1
TRINITY_DN1028_c0_g1_i11	2	ZIF1	ARATHProtein ZINC INDUCED FACILITATOR 1 OS=Arabidopsis thaliana OX=3702 GN=ZIF1 PE=1 SV=2
TRINITY_DN3245_c0_g1_i17	2	ZIF1	ARATHProtein ZINC INDUCED FACILITATOR 1 OS=Arabidopsis thaliana OX=3702 GN=ZIF1 PE=1 SV=2
TRINITY_DN1028_c0_g1_i18	2	ZIF1	ARATHProtein ZINC INDUCED FACILITATOR 1 OS=Arabidopsis thaliana OX=3702 GN=ZIF1 PE=1 SV=2
TRINITY_DN3245_c0_g1_i23	2	ZIF1	ARATHProtein ZINC INDUCED FACILITATOR 1 OS=Arabidopsis thaliana OX=3702 GN=ZIF1 PE=1 SV=2
TRINITY_DN1674_c0_g1_i3	2	ZFY26	BOVINZinc finger FYVE domain-containing protein 26 OS=Bos taurus OX=9913 GN=ZFYVE26 PE=3 SV=1
TRINITY_DN3216_c0_g1_i20	2	ZFY21	BOVINZinc finger FYVE domain-containing protein 21 OS=Bos taurus OX=9913 GN=ZFYVE21 PE=2 SV=1
TRINITY_DN791_c0_g1_i31	2	ZFPL1	NEMVEZinc finger protein-like 1 homolog OS=Nematostella vectensis OX=45351 GN=zfpl1 PE=3 SV=1
TRINITY_DN3549_c0_g1_i53	2	ZFN2B	MOUSEAN1-type zinc finger protein 2B OS=Mus musculus OX=10090 GN=Zfand2b PE=1 SV=1
TRINITY_DN3607_c3_g1_i12	2	ZFAN3	XENLAAN1-type zinc finger protein 3 homolog OS=Xenopus laevis OX=8355 GN=zfand3 PE=2 SV=1
TRINITY_DN1745_c1_g1_i14	2	ZFAN1	HUMANAN1-type zinc finger protein 1 OS=Homo sapiens OX=9606 GN=ZFAND1 PE=1 SV=1
TRINITY_DN2478_c0_g1_i16	2	ZDHC8	CANLFProbable palmitoyltransferase ZDHHC8 OS=Canis lupus familiaris OX=9615 GN=ZDHHC8 PE=2 SV=1
TRINITY_DN2478_c0_g1_i19	2	ZDHC8	CANLFProbable palmitoyltransferase ZDHHC8 OS=Canis lupus familiaris OX=9615 GN=ZDHHC8 PE=2 SV=1
TRINITY_DN2478_c0_g1_i2	2	ZDHC8	CANLFProbable palmitoyltransferase ZDHHC8 OS=Canis lupus familiaris OX=9615 GN=ZDHHC8 PE=2 SV=1
TRINITY_DN124_c0_g1_i10	2	ZDHC6	MOUSEPalmitoyltransferase ZDHHC6 OS=Mus musculus OX=10090 GN=Zdhhc6 PE=1 SV=1
TRINITY_DN2478_c0_g1_i3	2	ZDHC5	MOUSEPalmitoyltransferase ZDHHC5 OS=Mus musculus OX=10090 GN=Zdhhc5 PE=1 SV=1
TRINITY_DN2478_c0_g1_i17	2	ZDHC5	MOUSEPalmitoyltransferase ZDHHC5 OS=Mus musculus OX=10090 GN=Zdhhc5 PE=1 SV=1
TRINITY_DN2478_c0_g1_i13	2	ZDHC5	MOUSEPalmitoyltransferase ZDHHC5 OS=Mus musculus OX=10090 GN=Zdhhc5 PE=1 SV=1
TRINITY_DN2478_c0_g1_i5	2	ZDHC5	HUMANPalmitoyltransferase ZDHHC5 OS=Homo sapiens OX=9606 GN=ZDHHC5 PE=1 SV=2
TRINITY_DN1775_c0_g1_i10	2	ZDHC1	MOUSEProbable palmitoyltransferase ZDHHC1 OS=Mus musculus OX=10090 GN=Zdhhc1 PE=2 SV=2
TRINITY_DN4254_c0_g2_i32	2	ZDH22	ARATHProtein S-acyltransferase 24 OS=Arabidopsis thaliana OX=3702 GN=PAT24 PE=2 SV=1
TRINITY_DN3784_c1_g1_i50	2	ZDH17	RATPalmitoyltransferase ZDHHC17 OS=Rattus norvegicus OX=10116 GN=Zdhhc17 PE=1 SV=1
TRINITY_DN3784_c1_g1_i9	2	ZDH17	RATPalmitoyltransferase ZDHHC17 OS=Rattus norvegicus OX=10116 GN=Zdhhc17 PE=1 SV=1
TRINITY_DN1130_c0_g1_i10	2	ZDH17	HUMANPalmitoyltransferase ZDHHC17 OS=Homo sapiens OX=9606 GN=ZDHHC17 PE=1 SV=2
TRINITY_DN5064_c0_g1_i5	2	ZCPW1	MOUSEZinc finger CW-type PWWP domain protein 1 OS=Mus musculus OX=10090 GN=Zcwpw1 PE=1 SV=2
TRINITY_DN428_c0_g1_i12	2	ZCHC9	HUMANZinc finger CCHC domain-containing protein 9 OS=Homo sapiens OX=9606 GN=ZCCHC9 PE=1 SV=2
TRINITY_DN1740_c0_g1_i14	2	ZC3H8	MOUSEZinc finger CCCH domain-containing protein 8 OS=Mus musculus OX=10090 GN=Zc3h8 PE=1 SV=2
TRINITY_DN2004_c1_g1_i10	2	ZC3H3	MOUSEZinc finger CCCH domain-containing protein 3 OS=Mus musculus OX=10090 GN=Zc3h3 PE=1 SV=1
TRINITY_DN2004_c1_g1_i3	2	ZC3H3	MOUSEZinc finger CCCH domain-containing protein 3 OS=Mus musculus OX=10090 GN=Zc3h3 PE=1 SV=1
TRINITY_DN7850_c0_g1_i11	2	ZAP70	MOUSETyrosine-protein kinase ZAP-70 OS=Mus musculus OX=10090 GN=Zap70 PE=1 SV=3
TRINITY_DN13325_c0_g1_i1	2	ZAK1	DICDIDual specificity protein kinase zakA OS=Dictyostelium discoideum OX=44689 GN=zakA PE=1 SV=1
TRINITY_DN97091_c0_g1_i1	2	Z804A	MOUSEZinc finger protein 804A OS=Mus musculus OX=10090 GN=Znf804a PE=2 SV=1
TRINITY_DN7473_c0_g1_i6	2	YY42	CAEELGlycosyltransferase family 92 protein C33H5.2 OS=Caenorhabditis elegans OX=6239 GN=C33H5.2 PE=3 SV=1
TRINITY_DN916_c0_g1_i4	2	YWTG	BACSUPutative metabolite transport protein YwtG OS=Bacillus subtilis (strain 168) OX=224308 GN=ywtG PE=3 SV=1
TRINITY_DN204_c0_g1_i16	2	YWTG	BACSUPutative metabolite transport protein YwtG OS=Bacillus subtilis (strain 168) OX=224308 GN=ywtG PE=3 SV=1
TRINITY_DN3301_c0_g1_i1	2	YWBO	BACSUUncharacterized protein YwbO OS=Bacillus subtilis (strain 168) OX=224308 GN=ywbO PE=4 SV=1
TRINITY_DN5591_c0_g1_i15	2	YVDP	BACSUUncharacterized FAD-linked oxidoreductase YvdP OS=Bacillus subtilis (strain 168) OX=224308 GN=yvdP PE=1 SV=1
TRINITY_DN49377_c0_g2_i1	2	YUGP	BACSUPutative membrane protease YugP OS=Bacillus subtilis (strain 168) OX=224308 GN=yugP PE=4 SV=1
TRINITY_DN73945_c0_g1_i1	2	YUFO	BACSUUncharacterized ABC transporter ATP-binding protein YufO OS=Bacillus subtilis (strain 168) OX=224308 GN=yufO PE=3 SV=1
TRINITY_DN97785_c0_g1_i1	2	YUFO	BACSUUncharacterized ABC transporter ATP-binding protein YufO OS=Bacillus subtilis (strain 168) OX=224308 GN=yufO PE=3 SV=1
TRINITY_DN542_c0_g1_i75	2	YTBE	BACSUUncharacterized oxidoreductase YtbE OS=Bacillus subtilis (strain 168) OX=224308 GN=ytbE PE=1 SV=1
TRINITY_DN542_c0_g1_i46	2	YTBE	BACSUUncharacterized oxidoreductase YtbE OS=Bacillus subtilis (strain 168) OX=224308 GN=ytbE PE=1 SV=1
TRINITY_DN1044_c2_g1_i11	2	YT45	CAEELUncharacterized protein B0416.5 OS=Caenorhabditis elegans OX=6239 GN=B0416.5 PE=4 SV=1
TRINITY_DN5297_c0_g1_i7	2	YSDA	BACSUUncharacterized protein YsdA OS=Bacillus subtilis (strain 168) OX=224308 GN=ysdA PE=4 SV=1
TRINITY_DN69851_c0_g1_i1	2	YSCN	YERENProbable ATP synthase YscN OS=Yersinia enterocolitica OX=630 GN=yscN PE=1 SV=1
TRINITY_DN2926_c0_g1_i6	2	YS11	DROMEPutative gamma-glutamylcyclotransferase CG2811 OS=Drosophila melanogaster OX=7227 GN=CG2811 PE=2 SV=2
TRINITY_DN742_c1_g1_i1	2	YRKH	BACSUUncharacterized protein YrkH OS=Bacillus subtilis (strain 168) OX=224308 GN=yrkH PE=4 SV=2
TRINITY_DN101204_c0_g1_i1	2	YRHP	BACSUUncharacterized membrane protein YrhP OS=Bacillus subtilis (strain 168) OX=224308 GN=yrhP PE=3 SV=2
TRINITY_DN4936_c0_g1_i3	2	YRD6	CAEELUncharacterized protein K02A2.6 OS=Caenorhabditis elegans OX=6239 GN=K02A2.6 PE=4 SV=1
TRINITY_DN10651_c0_g1_i5	2	YRD6	CAEELUncharacterized protein K02A2.6 OS=Caenorhabditis elegans OX=6239 GN=K02A2.6 PE=4 SV=1
TRINITY_DN2861_c0_g1_i16	2	YRD6	CAEELUncharacterized protein K02A2.6 OS=Caenorhabditis elegans OX=6239 GN=K02A2.6 PE=4 SV=1
TRINITY_DN78654_c0_g1_i1	2	YRD6	CAEELUncharacterized protein K02A2.6 OS=Caenorhabditis elegans OX=6239 GN=K02A2.6 PE=4 SV=1
TRINITY_DN28395_c4_g1_i1	2	YRD6	CAEELUncharacterized protein K02A2.6 OS=Caenorhabditis elegans OX=6239 GN=K02A2.6 PE=4 SV=1
TRINITY_DN207_c0_g1_i24	2	YRD6	CAEELUncharacterized protein K02A2.6 OS=Caenorhabditis elegans OX=6239 GN=K02A2.6 PE=4 SV=1
TRINITY_DN9174_c0_g1_i21	2	YRD6	CAEELUncharacterized protein K02A2.6 OS=Caenorhabditis elegans OX=6239 GN=K02A2.6 PE=4 SV=1
TRINITY_DN2861_c0_g1_i25	2	YRD6	CAEELUncharacterized protein K02A2.6 OS=Caenorhabditis elegans OX=6239 GN=K02A2.6 PE=4 SV=1
TRINITY_DN4936_c0_g1_i18	2	YRD6	CAEELUncharacterized protein K02A2.6 OS=Caenorhabditis elegans OX=6239 GN=K02A2.6 PE=4 SV=1
TRINITY_DN2861_c0_g1_i18	2	YRD6	CAEELUncharacterized protein K02A2.6 OS=Caenorhabditis elegans OX=6239 GN=K02A2.6 PE=4 SV=1
TRINITY_DN2224_c0_g1_i63	2	YRD6	CAEELUncharacterized protein K02A2.6 OS=Caenorhabditis elegans OX=6239 GN=K02A2.6 PE=4 SV=1
TRINITY_DN50880_c0_g1_i1	2	YRD6	CAEELUncharacterized protein K02A2.6 OS=Caenorhabditis elegans OX=6239 GN=K02A2.6 PE=4 SV=1
TRINITY_DN48044_c2_g1_i18	2	YRD6	CAEELUncharacterized protein K02A2.6 OS=Caenorhabditis elegans OX=6239 GN=K02A2.6 PE=4 SV=1
TRINITY_DN20527_c0_g1_i9	2	YRD6	CAEELUncharacterized protein K02A2.6 OS=Caenorhabditis elegans OX=6239 GN=K02A2.6 PE=4 SV=1
TRINITY_DN5574_c0_g1_i12	2	YRD6	CAEELUncharacterized protein K02A2.6 OS=Caenorhabditis elegans OX=6239 GN=K02A2.6 PE=4 SV=1
TRINITY_DN24020_c0_g1_i22	2	YRD6	CAEELUncharacterized protein K02A2.6 OS=Caenorhabditis elegans OX=6239 GN=K02A2.6 PE=4 SV=1
TRINITY_DN28842_c0_g2_i7	2	YRD6	CAEELUncharacterized protein K02A2.6 OS=Caenorhabditis elegans OX=6239 GN=K02A2.6 PE=4 SV=1
TRINITY_DN2266_c1_g1_i12	2	YRD6	CAEELUncharacterized protein K02A2.6 OS=Caenorhabditis elegans OX=6239 GN=K02A2.6 PE=4 SV=1
TRINITY_DN13065_c0_g2_i3	2	YRD6	CAEELUncharacterized protein K02A2.6 OS=Caenorhabditis elegans OX=6239 GN=K02A2.6 PE=4 SV=1
TRINITY_DN24020_c0_g1_i15	2	YRD6	CAEELUncharacterized protein K02A2.6 OS=Caenorhabditis elegans OX=6239 GN=K02A2.6 PE=4 SV=1
TRINITY_DN89449_c0_g1_i1	2	YRBF	BACSUSec translocon accessory complex subunit YrbF OS=Bacillus subtilis (strain 168) OX=224308 GN=yrbF PE=3 SV=1
TRINITY_DN3573_c0_g2_i11	2	YR826	MIMIVPutative serine/threonine-protein kinase/receptor R826 OS=Acanthamoeba polyphaga mimivirus OX=212035 GN=MIMI
TRINITY_DN22104_c0_g1_i1	2	YR818	MIMIVPutative serine/threonine-protein kinase/receptor R818 OS=Acanthamoeba polyphaga mimivirus OX=212035 GN=MIMI
TRINITY_DN3342_c0_g1_i10	2	YR354	MIMIVUncharacterized protein R354 OS=Acanthamoeba polyphaga mimivirus OX=212035 GN=MIMI
TRINITY_DN10408_c0_g1_i3	2	YR260	MIMIVDnaJ-like protein R260 OS=Acanthamoeba polyphaga mimivirus OX=212035 GN=MIMI
TRINITY_DN30336_c0_g1_i26	2	YQMA	SCHPOAnkyrin repeat-containing protein P1E11.10 OS=Schizosaccharomyces pombe (strain 972 / ATCC 24843) OX=284812 GN=SPCP1E11.10 PE=4 SV=1
TRINITY_DN27689_c0_g1_i34	2	YQMA	SCHPOAnkyrin repeat-containing protein P1E11.10 OS=Schizosaccharomyces pombe (strain 972 / ATCC 24843) OX=284812 GN=SPCP1E11.10 PE=4 SV=1
TRINITY_DN15176_c0_g1_i2	2	YPTC4	CHLREGTP-binding protein YPTC4 OS=Chlamydomonas reinhardtii OX=3055 GN=YPTC4 PE=3 SV=1
TRINITY_DN3044_c1_g1_i15	2	YPQ1	YEASTProbable vacuolar amino acid transporter YPQ1 OS=Saccharomyces cerevisiae (strain ATCC 204508 / S288c) OX=559292 GN=YPQ1 PE=1 SV=1
TRINITY_DN3044_c1_g1_i6	2	YPQ1	YEASTProbable vacuolar amino acid transporter YPQ1 OS=Saccharomyces cerevisiae (strain ATCC 204508 / S288c) OX=559292 GN=YPQ1 PE=1 SV=1
TRINITY_DN3923_c0_g1_i10	2	YOW5	SCHPOPseudouridine-metabolizing bifunctional protein C1861.05 OS=Schizosaccharomyces pombe (strain 972 / ATCC 24843) OX=284812 GN=SPBC1861.05 PE=3 SV=1
TRINITY_DN32395_c0_g1_i6	2	YORF	SCHPOUncharacterized RING finger protein P8B7.15c OS=Schizosaccharomyces pombe (strain 972 / ATCC 24843) OX=284812 GN=SPBP8B7.15c PE=4 SV=1
TRINITY_DN114441_c0_g1_i1	2	YOGA	BACSUUncharacterized zinc-type alcohol dehydrogenase-like protein YogA OS=Bacillus subtilis (strain 168) OX=224308 GN=yogA PE=3 SV=1
TRINITY_DN77667_c0_g1_i1	2	YOCR	BACSUUncharacterized sodium-dependent transporter YocR OS=Bacillus subtilis (strain 168) OX=224308 GN=yocR PE=3 SV=1
TRINITY_DN139216_c0_g1_i1	2	YOCE	SCHPOUncharacterized RNA-binding protein C4F6.14 OS=Schizosaccharomyces pombe (strain 972 / ATCC 24843) OX=284812 GN=SPBC4F6.14 PE=1 SV=1
TRINITY_DN1132_c0_g1_i1	2	YOBN	BACSUPutative L-amino-acid oxidase YobN OS=Bacillus subtilis (strain 168) OX=224308 GN=yobN PE=3 SV=3
TRINITY_DN1554_c0_g1_i3	2	YOBN	BACSUPutative L-amino-acid oxidase YobN OS=Bacillus subtilis (strain 168) OX=224308 GN=yobN PE=3 SV=3
TRINITY_DN1132_c0_g1_i2	2	YOBN	BACSUPutative L-amino-acid oxidase YobN OS=Bacillus subtilis (strain 168) OX=224308 GN=yobN PE=3 SV=3
TRINITY_DN1653_c0_g1_i105	2	YNS9	SCHPOUncharacterized protein C18H10.09 OS=Schizosaccharomyces pombe (strain 972 / ATCC 24843) OX=284812 GN=SPBC18H10.09 PE=4 SV=2
TRINITY_DN146_c2_g1_i3	2	YNG2	KLULAChromatin modification-related protein YNG2 OS=Kluyveromyces lactis (strain ATCC 8585 / CBS 2359 / DSM 70799 / NBRC 1267 / NRRL Y-1140 / WM37) OX=284590 GN=YNG2 PE=3 SV=1
TRINITY_DN146_c2_g1_i10	2	YNG2	KLULAChromatin modification-related protein YNG2 OS=Kluyveromyces lactis (strain ATCC 8585 / CBS 2359 / DSM 70799 / NBRC 1267 / NRRL Y-1140 / WM37) OX=284590 GN=YNG2 PE=3 SV=1
TRINITY_DN44736_c0_g3_i1	2	YNF8	RHIMLUncharacterized protein ORF8 in nfe locus (Fragment) OS=Rhizobium meliloti OX=382 PE=4 SV=1
TRINITY_DN44736_c0_g3_i2	2	YNF8	RHIMLUncharacterized protein ORF8 in nfe locus (Fragment) OS=Rhizobium meliloti OX=382 PE=4 SV=1
TRINITY_DN2377_c0_g1_i84	2	YLPM1	RATYLP motif-containing protein 1 OS=Rattus norvegicus OX=10116 GN=Ylpm1 PE=1 SV=1
TRINITY_DN4194_c0_g1_i98	2	YLAT1	HUMANY+L amino acid transporter 1 OS=Homo sapiens OX=9606 GN=SLC7A7 PE=1 SV=2
TRINITY_DN49491_c0_g1_i3	2	YL662	MIMIVUncharacterized protein L662 OS=Acanthamoeba polyphaga mimivirus OX=212035 GN=MIMI
TRINITY_DN92032_c0_g1_i1	2	YL233	MIMIVPutative zinc protease L233 OS=Acanthamoeba polyphaga mimivirus OX=212035 GN=MIMI
TRINITY_DN347_c1_g1_i1	2	YL	DROMEPutative vitellogenin receptor OS=Drosophila melanogaster OX=7227 GN=yl PE=1 SV=2
TRINITY_DN13199_c0_g1_i14	2	YKT6	BOVINSynaptobrevin homolog YKT6 OS=Bos taurus OX=9913 GN=YKT6 PE=2 SV=1
TRINITY_DN80870_c0_g1_i1	2	YK86	CAEELUncharacterized protein C30A5.10 OS=Caenorhabditis elegans OX=6239 GN=C30A5.10 PE=3 SV=4
TRINITY_DN112183_c0_g1_i1	2	YJV3	YEASTUncharacterized protein YJL213W OS=Saccharomyces cerevisiae (strain ATCC 204508 / S288c) OX=559292 GN=YJL213W PE=3 SV=1
TRINITY_DN39955_c1_g1_i1	2	YJ95	SCHPOUncharacterized RING finger protein C548.05c OS=Schizosaccharomyces pombe (strain 972 / ATCC 24843) OX=284812 GN=SPCC548.05c PE=4 SV=1
TRINITY_DN6895_c0_g1_i4	2	YJ2I	SCHPOUncharacterized protein C4B3.18 OS=Schizosaccharomyces pombe (strain 972 / ATCC 24843) OX=284812 GN=SPCC4B3.18 PE=3 SV=1
TRINITY_DN6895_c0_g1_i12	2	YJ2I	SCHPOUncharacterized protein C4B3.18 OS=Schizosaccharomyces pombe (strain 972 / ATCC 24843) OX=284812 GN=SPCC4B3.18 PE=3 SV=1
TRINITY_DN1166_c0_g1_i86	2	YIPF6	DANREProtein YIPF6 OS=Danio rerio OX=7955 GN=yipf6 PE=2 SV=1
TRINITY_DN1237_c0_g1_i105	2	YIPF5	RATProtein YIPF5 OS=Rattus norvegicus OX=10116 GN=Yipf5 PE=2 SV=1
TRINITY_DN1237_c0_g1_i4	2	YIPF5	RATProtein YIPF5 OS=Rattus norvegicus OX=10116 GN=Yipf5 PE=2 SV=1
TRINITY_DN17284_c0_g1_i43	2	YIHR	ECOLIUncharacterized protein YihR OS=Escherichia coli (strain K12) OX=83333 GN=yihR PE=1 SV=1
TRINITY_DN17284_c0_g1_i35	2	YIHR	ECOLIUncharacterized protein YihR OS=Escherichia coli (strain K12) OX=83333 GN=yihR PE=1 SV=1
TRINITY_DN118309_c0_g1_i1	2	YIDC	PSEMYMembrane protein insertase YidC OS=Pseudomonas mendocina (strain ymp) OX=399739 GN=yidC PE=3 SV=1
TRINITY_DN104896_c0_g1_i1	2	YIAD	ECOLIProbable lipoprotein YiaD OS=Escherichia coli (strain K12) OX=83333 GN=yiaD PE=1 SV=2
TRINITY_DN15623_c0_g1_i25	2	YI31B	YEASTTransposon Ty3-I Gag-Pol polyprotein OS=Saccharomyces cerevisiae (strain ATCC 204508 / S288c) OX=559292 GN=TY3B-I PE=1 SV=2
TRINITY_DN30402_c0_g1_i5	2	YI31B	YEASTTransposon Ty3-I Gag-Pol polyprotein OS=Saccharomyces cerevisiae (strain ATCC 204508 / S288c) OX=559292 GN=TY3B-I PE=1 SV=2
TRINITY_DN27532_c0_g1_i9	2	YI31B	YEASTTransposon Ty3-I Gag-Pol polyprotein OS=Saccharomyces cerevisiae (strain ATCC 204508 / S288c) OX=559292 GN=TY3B-I PE=1 SV=2
TRINITY_DN20728_c0_g1_i4	2	YI31B	YEASTTransposon Ty3-I Gag-Pol polyprotein OS=Saccharomyces cerevisiae (strain ATCC 204508 / S288c) OX=559292 GN=TY3B-I PE=1 SV=2
TRINITY_DN6790_c0_g2_i1	2	YI31B	YEASTTransposon Ty3-I Gag-Pol polyprotein OS=Saccharomyces cerevisiae (strain ATCC 204508 / S288c) OX=559292 GN=TY3B-I PE=1 SV=2
TRINITY_DN98489_c0_g1_i1	2	YHFA	ECO57Protein YhfA OS=Escherichia coli O157:H7 OX=83334 GN=yhfA PE=4 SV=1
TRINITY_DN49333_c0_g1_i1	2	YHAA	BACSUPutative amidohydrolase YhaA OS=Bacillus subtilis (strain 168) OX=224308 GN=yhaA PE=3 SV=3
TRINITY_DN10400_c0_g1_i2	2	YGAK	BACSUUncharacterized FAD-linked oxidoreductase YgaK OS=Bacillus subtilis (strain 168) OX=224308 GN=ygaK PE=3 SV=4
TRINITY_DN29124_c0_g1_i15	2	YG31B	YEASTTransposon Ty3-G Gag-Pol polyprotein OS=Saccharomyces cerevisiae (strain ATCC 204508 / S288c) OX=559292 GN=TY3B-G PE=1 SV=3
TRINITY_DN6569_c0_g1_i8	2	YG31B	YEASTTransposon Ty3-G Gag-Pol polyprotein OS=Saccharomyces cerevisiae (strain ATCC 204508 / S288c) OX=559292 GN=TY3B-G PE=1 SV=3
TRINITY_DN2025_c0_g1_i1	2	YFMJ	BACSUPutative NADP-dependent oxidoreductase YfmJ OS=Bacillus subtilis (strain 168) OX=224308 GN=yfmJ PE=2 SV=1
TRINITY_DN11848_c0_g1_i1	2	YFLP	BACSUUPF0065 protein YflP OS=Bacillus subtilis (strain 168) OX=224308 GN=yflP PE=3 SV=2
TRINITY_DN38933_c0_g1_i1	2	YFLP	BACSUUPF0065 protein YflP OS=Bacillus subtilis (strain 168) OX=224308 GN=yflP PE=3 SV=2
TRINITY_DN7397_c1_g1_i18	2	YFEX	ECO57Dye-decolorizing peroxidase YfeX OS=Escherichia coli O157:H7 OX=83334 GN=yfeX PE=1 SV=2
TRINITY_DN108894_c0_g1_i1	2	YFEB	YERPEChelated iron transport system membrane protein YfeB OS=Yersinia pestis OX=632 GN=yfeB PE=3 SV=1
TRINITY_DN9095_c0_g1_i11	2	YETS4	HUMANYEATS domain-containing protein 4 OS=Homo sapiens OX=9606 GN=YEATS4 PE=1 SV=1
TRINITY_DN105821_c0_g1_i1	2	YEAG	ECO57Uncharacterized protein YeaG OS=Escherichia coli O157:H7 OX=83334 GN=yeaG PE=3 SV=1
TRINITY_DN118302_c0_g1_i1	2	YEAC	BACSUUncharacterized protein YeaC OS=Bacillus subtilis (strain 168) OX=224308 GN=yeaC PE=3 SV=2
TRINITY_DN75027_c0_g1_i1	2	YDFJ	BACSUMembrane protein YdfJ OS=Bacillus subtilis (strain 168) OX=224308 GN=ydfJ PE=2 SV=1
TRINITY_DN91917_c0_g1_i1	2	YDFG	ECOL6NADP-dependent 3-hydroxy acid dehydrogenase YdfG OS=Escherichia coli O6:H1 (strain CFT073 / ATCC 700928 / UPEC) OX=199310 GN=ydfG PE=3 SV=2
TRINITY_DN61243_c0_g1_i1	2	YDAP	BACSUPutative thiamine pyrophosphate-containing protein YdaP OS=Bacillus subtilis (strain 168) OX=224308 GN=ydaP PE=2 SV=1
TRINITY_DN124184_c0_g1_i1	2	YDAP	BACSUPutative thiamine pyrophosphate-containing protein YdaP OS=Bacillus subtilis (strain 168) OX=224308 GN=ydaP PE=2 SV=1
TRINITY_DN15313_c3_g1_i2	2	YCU1	YEASTAnkyrin repeat-containing protein YCR051W OS=Saccharomyces cerevisiae (strain ATCC 204508 / S288c) OX=559292 GN=YCR051W PE=1 SV=1
TRINITY_DN1579_c3_g1_i20	2	YCU1	YEASTAnkyrin repeat-containing protein YCR051W OS=Saccharomyces cerevisiae (strain ATCC 204508 / S288c) OX=559292 GN=YCR051W PE=1 SV=1
TRINITY_DN76503_c0_g1_i1	2	YCF78	CHLVUUncharacterized membrane protein ycf78 OS=Chlorella vulgaris OX=3077 GN=ycf78 PE=3 SV=1
TRINITY_DN30156_c1_g1_i1	2	YCF66	TRICVUncharacterized protein ycf66 OS=Trieres chinensis OX=1514140 GN=ycf66 PE=3 SV=1
TRINITY_DN30156_c0_g1_i1	2	YCF66	TRICVUncharacterized protein ycf66 OS=Trieres chinensis OX=1514140 GN=ycf66 PE=3 SV=1
TRINITY_DN21037_c0_g1_i1	2	YCF4	PHATCPhotosystem I assembly protein Ycf4 OS=Phaeodactylum tricornutum (strain CCAP 1055/1) OX=556484 GN=ycf4 PE=3 SV=1
TRINITY_DN84627_c0_g1_i1	2	YCF24	TRICVUPF0051 protein ycf24 OS=Trieres chinensis OX=1514140 GN=ycf24 PE=3 SV=1
TRINITY_DN141148_c0_g1_i1	2	YCF24	CYAPAUPF0051 protein ycf24 OS=Cyanophora paradoxa OX=2762 GN=ycf24 PE=3 SV=1
TRINITY_DN5185_c0_g1_i9	2	YC91	CAEELUncharacterized MFS-type transporter C09D4.1 OS=Caenorhabditis elegans OX=6239 GN=C09D4.1 PE=3 SV=2
TRINITY_DN2900_c0_g1_i2	2	YC006	HUMANUncharacterized protein FLJ43738 OS=Homo sapiens OX=9606 PE=2 SV=1
TRINITY_DN17051_c1_g1_i12	2	YBOX1	XENLAY-box-binding protein 1 OS=Xenopus laevis OX=8355 GN=ybx1 PE=2 SV=1
TRINITY_DN57822_c0_g2_i1	2	YBAC	BACSUProbable aminopeptidase YbaC OS=Bacillus subtilis (strain 168) OX=224308 GN=ybaC PE=3 SV=2
TRINITY_DN16245_c0_g2_i4	2	YB35	SCHPOOxysterol-binding protein homolog C2F12.05c OS=Schizosaccharomyces pombe (strain 972 / ATCC 24843) OX=284812 GN=SPBC2F12.05c PE=1 SV=2
TRINITY_DN3605_c0_g1_i6	2	YAP1	DANRETranscriptional coactivator YAP1 OS=Danio rerio OX=7955 GN=yap1 PE=2 SV=2
TRINITY_DN3605_c0_g1_i5	2	YAP1	DANRETranscriptional coactivator YAP1 OS=Danio rerio OX=7955 GN=yap1 PE=2 SV=2
TRINITY_DN22688_c0_g1_i10	2	YAJO	ECOLI1-deoxyxylulose-5-phosphate synthase YajO OS=Escherichia coli (strain K12) OX=83333 GN=yajO PE=1 SV=2
TRINITY_DN15613_c0_g1_i7	2	YAHD	ECOLIPutative ankyrin repeat protein YahD OS=Escherichia coli (strain K12) OX=83333 GN=yahD PE=4 SV=1
TRINITY_DN42249_c0_g3_i1	2	YAHD	ECOLIPutative ankyrin repeat protein YahD OS=Escherichia coli (strain K12) OX=83333 GN=yahD PE=4 SV=1
TRINITY_DN85198_c0_g1_i1	2	YAF2	MOUSEYY1-associated factor 2 OS=Mus musculus OX=10090 GN=Yaf2 PE=1 SV=1
TRINITY_DN19035_c0_g1_i1	2	Y9963	DICDIProbable serine/threonine-protein kinase DDB
TRINITY_DN5873_c0_g1_i1	2	Y9963	DICDIProbable serine/threonine-protein kinase DDB
TRINITY_DN12893_c0_g1_i15	2	Y9963	DICDIProbable serine/threonine-protein kinase DDB
TRINITY_DN28101_c0_g1_i1	2	Y9963	DICDIProbable serine/threonine-protein kinase DDB
TRINITY_DN7350_c0_g1_i2	2	Y9955	DICDIProbable serine/threonine-protein kinase DDB
TRINITY_DN34995_c0_g1_i6	2	Y9880	DICDICaiB/baiF CoA-transferase family protein DDB
TRINITY_DN487_c0_g1_i26	2	Y9871	DICDIProbable serine/threonine-protein kinase DDB
TRINITY_DN4310_c0_g1_i2	2	Y9871	DICDIProbable serine/threonine-protein kinase DDB
TRINITY_DN654_c0_g1_i11	2	Y9871	DICDIProbable serine/threonine-protein kinase DDB
TRINITY_DN14392_c0_g1_i2	2	Y9871	DICDIProbable serine/threonine-protein kinase DDB
TRINITY_DN13738_c0_g1_i3	2	Y9863	DICDIProbable serine/threonine-protein kinase DDB
TRINITY_DN5873_c0_g1_i18	2	Y9863	DICDIProbable serine/threonine-protein kinase DDB
TRINITY_DN851_c1_g1_i9	2	Y9863	DICDIProbable serine/threonine-protein kinase DDB
TRINITY_DN17930_c0_g3_i1	2	Y9853	DICDIProbable serine/threonine-protein kinase DDB
TRINITY_DN1825_c1_g1_i7	2	Y9853	DICDIProbable serine/threonine-protein kinase DDB
TRINITY_DN21820_c0_g1_i2	2	Y9853	DICDIProbable serine/threonine-protein kinase DDB
TRINITY_DN10537_c0_g1_i3	2	Y9851	DICDIProbable serine/threonine-protein kinase DDB
TRINITY_DN31383_c0_g1_i8	2	Y9851	DICDIProbable serine/threonine-protein kinase DDB
TRINITY_DN12611_c0_g1_i4	2	Y9851	DICDIProbable serine/threonine-protein kinase DDB
TRINITY_DN3798_c0_g1_i1	2	Y9801	DROMEPP2C-like domain-containing protein CG9801 OS=Drosophila melanogaster OX=7227 GN=CG9801 PE=2 SV=1
TRINITY_DN104651_c0_g1_i1	2	Y972	CYTH3UPF0403 protein CHU
TRINITY_DN3989_c0_g1_i1	2	Y964	METJAUncharacterized protein MJ0964 OS=Methanocaldococcus jannaschii (strain ATCC 43067 / DSM 2661 / JAL-1 / JCM 10045 / NBRC 100440) OX=243232 GN=MJ0964 PE=3 SV=1
TRINITY_DN132944_c0_g1_i1	2	Y963	METJAUncharacterized protein MJ0963 OS=Methanocaldococcus jannaschii (strain ATCC 43067 / DSM 2661 / JAL-1 / JCM 10045 / NBRC 100440) OX=243232 GN=MJ0963 PE=3 SV=1
TRINITY_DN140125_c0_g1_i1	2	Y927C	MYCTOUncharacterized oxidoreductase MT0954 OS=Mycobacterium tuberculosis (strain CDC 1551 / Oshkosh) OX=83331 GN=MT0954 PE=3 SV=1
TRINITY_DN29318_c0_g1_i1	2	Y912	HAEINUncharacterized protein HI
TRINITY_DN11818_c0_g1_i11	2	Y8923	DICDIPutative uncharacterized transmembrane protein DDB
TRINITY_DN9384_c0_g1_i15	2	Y8923	DICDIPutative uncharacterized transmembrane protein DDB
TRINITY_DN9384_c0_g1_i3	2	Y8923	DICDIPutative uncharacterized transmembrane protein DDB
TRINITY_DN20290_c0_g1_i6	2	Y8923	DICDIPutative uncharacterized transmembrane protein DDB
TRINITY_DN20290_c0_g1_i19	2	Y8923	DICDIPutative uncharacterized transmembrane protein DDB
TRINITY_DN18899_c0_g1_i9	2	Y8923	DICDIPutative uncharacterized transmembrane protein DDB
TRINITY_DN98765_c0_g1_i1	2	Y877	MYCTOUncharacterized protein MT0900 OS=Mycobacterium tuberculosis (strain CDC 1551 / Oshkosh) OX=83331 GN=MT0900 PE=4 SV=1
TRINITY_DN4706_c0_g1_i8	2	Y8295	DICDIPutative phosphatidylglycerol/phosphatidylinositol transfer protein DDB
TRINITY_DN4706_c0_g1_i1	2	Y8295	DICDIPutative phosphatidylglycerol/phosphatidylinositol transfer protein DDB
TRINITY_DN6917_c0_g1_i9	2	Y8045	DICDIProbable poly
TRINITY_DN135461_c0_g1_i1	2	Y796	METJAUncharacterized ABC transporter ATP-binding protein MJ0796 OS=Methanocaldococcus jannaschii (strain ATCC 43067 / DSM 2661 / JAL-1 / JCM 10045 / NBRC 100440) OX=243232 GN=MJ0796 PE=1 SV=1
TRINITY_DN11303_c0_g2_i8	2	Y7754	DICDITNF receptor-associated factor family protein DDB
TRINITY_DN4790_c1_g1_i1	2	Y669	CUPNHPutative tyrosine-protein phosphatase H16
TRINITY_DN280_c0_g1_i32	2	Y5977	ARATHProbable leucine-rich repeat receptor-like protein kinase At5g49770 OS=Arabidopsis thaliana OX=3702 GN=At5g49770 PE=1 SV=1
TRINITY_DN79735_c0_g1_i1	2	Y561	HAEINPutative oligopeptide transporter HI
TRINITY_DN107681_c0_g1_i1	2	Y531	METJAUniversal stress protein MJ0531 OS=Methanocaldococcus jannaschii (strain ATCC 43067 / DSM 2661 / JAL-1 / JCM 10045 / NBRC 100440) OX=243232 GN=MJ0531 PE=3 SV=1
TRINITY_DN126859_c0_g1_i1	2	Y525	MYCTUUncharacterized protein Rv0525 OS=Mycobacterium tuberculosis (strain ATCC 25618 / H37Rv) OX=83332 GN=Rv0525 PE=1 SV=1
TRINITY_DN2512_c1_g1_i5	2	Y5224	ARATHUncharacterized protein At5g02240 OS=Arabidopsis thaliana OX=3702 GN=At5g02240 PE=1 SV=1
TRINITY_DN2512_c1_g1_i1	2	Y5224	ARATHUncharacterized protein At5g02240 OS=Arabidopsis thaliana OX=3702 GN=At5g02240 PE=1 SV=1
TRINITY_DN13406_c0_g1_i17	2	Y5182	ARATHProbable LRR receptor-like serine/threonine-protein kinase At1g51820 OS=Arabidopsis thaliana OX=3702 GN=At1g51820 PE=1 SV=1
TRINITY_DN13888_c0_g1_i1	2	Y5182	ARATHProbable LRR receptor-like serine/threonine-protein kinase At1g51820 OS=Arabidopsis thaliana OX=3702 GN=At1g51820 PE=1 SV=1
TRINITY_DN1445_c0_g1_i12	2	Y508	THEMAUncharacterized protein TM
TRINITY_DN28045_c0_g1_i11	2	Y508	THEMAUncharacterized protein TM
TRINITY_DN1445_c0_g1_i11	2	Y508	THEMAUncharacterized protein TM
TRINITY_DN1445_c0_g1_i48	2	Y508	THEMAUncharacterized protein TM
TRINITY_DN1445_c0_g1_i54	2	Y508	THEMAUncharacterized protein TM
TRINITY_DN134855_c0_g1_i1	2	Y5073	MYCS2Putative O-methyltransferase MSMEG
TRINITY_DN36520_c0_g1_i10	2	Y502	TREPAPutative ankyrin repeat-containing protein TP
TRINITY_DN43118_c0_g2_i1	2	Y4OS	SINFNUncharacterized ABC transporter ATP-binding protein y4oS OS=Sinorhizobium fredii (strain NBRC 101917 / NGR234) OX=394 GN=NGR
TRINITY_DN411_c0_g1_i25	2	Y4MH	SINFNUncharacterized protein y4mH OS=Sinorhizobium fredii (strain NBRC 101917 / NGR234) OX=394 GN=NGR
TRINITY_DN5792_c0_g1_i12	2	Y4GC	SINFNPutative integrase/recombinase y4gC OS=Sinorhizobium fredii (strain NBRC 101917 / NGR234) OX=394 GN=NGR
TRINITY_DN1453_c0_g1_i69	2	Y489	RICBRPutative ankyrin repeat protein RBE
TRINITY_DN2396_c0_g1_i8	2	Y4775	DICDIPH domain-containing protein DDB
TRINITY_DN94105_c0_g1_i1	2	Y474	MYCTOUncharacterized HTH-type transcriptional regulator MT0491 OS=Mycobacterium tuberculosis (strain CDC 1551 / Oshkosh) OX=83331 GN=MT0491 PE=4 SV=1
TRINITY_DN132753_c0_g1_i1	2	Y4614	STRCOUPF0234 protein SCO4614 OS=Streptomyces coelicolor (strain ATCC BAA-471 / A3(2) / M145) OX=100226 GN=SCO4614 PE=3 SV=1
TRINITY_DN133646_c0_g1_i1	2	Y4555	BACTNUPF0365 protein BT
TRINITY_DN125162_c0_g1_i1	2	Y449	BUCAIUPF0056 membrane protein BU449 OS=Buchnera aphidicola subsp. Acyrthosiphon pisum (strain APS) OX=107806 GN=BU449 PE=3 SV=2
TRINITY_DN581_c0_g1_i8	2	Y4423	ARATHDUF21 domain-containing protein At4g14230 OS=Arabidopsis thaliana OX=3702 GN=CBSDUF2 PE=2 SV=1
TRINITY_DN581_c0_g1_i15	2	Y4423	ARATHDUF21 domain-containing protein At4g14230 OS=Arabidopsis thaliana OX=3702 GN=CBSDUF2 PE=2 SV=1
TRINITY_DN4088_c1_g1_i38	2	Y4399	DICDIProbable helicase DDB
TRINITY_DN62672_c0_g1_i1	2	Y434	BUCAPUPF0056 membrane protein BUsg
TRINITY_DN59332_c0_g1_i1	2	Y4291	ARATHProbable LRR receptor-like serine/threonine-protein kinase At4g29180 OS=Arabidopsis thaliana OX=3702 GN=At4g29180 PE=1 SV=2
TRINITY_DN8705_c0_g1_i3	2	Y4245	ARATHProbable LRR receptor-like serine/threonine-protein kinase At4g20450 OS=Arabidopsis thaliana OX=3702 GN=At4g20450 PE=1 SV=1
TRINITY_DN75594_c0_g1_i1	2	Y3758	AGRFCUPF0335 protein Atu3758 OS=Agrobacterium fabrum (strain C58 / ATCC 33970) OX=176299 GN=Atu3758 PE=3 SV=1
TRINITY_DN63907_c0_g1_i1	2	Y3691	BRUMEPutative binding protein BMEII0691 OS=Brucella melitensis biotype 1 (strain 16M / ATCC 23456 / NCTC 10094) OX=224914 GN=BMEII0691 PE=3 SV=1
TRINITY_DN111270_c0_g1_i1	2	Y3524	METJAUncharacterized protein MJECL24 OS=Methanocaldococcus jannaschii (strain ATCC 43067 / DSM 2661 / JAL-1 / JCM 10045 / NBRC 100440) OX=243232 GN=MJECL24 PE=3 SV=1
TRINITY_DN108674_c0_g1_i1	2	Y352	THEMAUncharacterized ABC transporter ATP-binding protein TM
TRINITY_DN64205_c0_g1_i1	2	Y344	CHLPNPutative zinc metalloprotease CPn
TRINITY_DN26005_c0_g1_i5	2	Y3435	DICDITNF receptor-associated factor family protein DDB
TRINITY_DN30466_c0_g1_i1	2	Y3430	PSEAEPutative aldolase class 2 protein PA3430 OS=Pseudomonas aeruginosa (strain ATCC 15692 / DSM 22644 / CIP 104116 / JCM 14847 / LMG 12228 / 1C / PRS 101 / PAO1) OX=208964 GN=PA3430 PE=3 SV=1
TRINITY_DN121937_c0_g1_i1	2	Y3402	METJAUncharacterized adenine-specific methylase MJECS02 OS=Methanocaldococcus jannaschii (strain ATCC 43067 / DSM 2661 / JAL-1 / JCM 10045 / NBRC 100440) OX=243232 GN=MJECS02 PE=3 SV=1
TRINITY_DN106571_c0_g1_i1	2	Y3329	MYCTUProbable aminotransferase Rv3329 OS=Mycobacterium tuberculosis (strain ATCC 25618 / H37Rv) OX=83332 GN=Rv3329 PE=1 SV=2
TRINITY_DN94630_c0_g1_i1	2	Y3329	MYCTUProbable aminotransferase Rv3329 OS=Mycobacterium tuberculosis (strain ATCC 25618 / H37Rv) OX=83332 GN=Rv3329 PE=1 SV=2
TRINITY_DN22104_c0_g2_i8	2	Y3174	ARATHProbable receptor-like protein kinase At3g17420 OS=Arabidopsis thaliana OX=3702 GN=At3g17420 PE=1 SV=1
TRINITY_DN75927_c0_g1_i1	2	Y3055	STRAWUPF0182 protein SAV
TRINITY_DN93263_c0_g1_i1	2	Y2987	NOSS1UPF0187 protein alr2987 OS=Nostoc sp. (strain PCC 7120 / SAG 25.82 / UTEX 2576) OX=103690 GN=alr2987 PE=3 SV=1
TRINITY_DN119318_c0_g1_i1	2	Y296	BUCBPUncharacterized metalloprotease bbp
TRINITY_DN81756_c0_g1_i1	2	Y2691	CYTH3UPF0176 protein CHU
TRINITY_DN49863_c0_g1_i1	2	Y2620	STAA3UPF0312 protein SAUSA300
TRINITY_DN94308_c0_g1_i1	2	Y2604	PSEAEUncharacterized protein PA2604 OS=Pseudomonas aeruginosa (strain ATCC 15692 / DSM 22644 / CIP 104116 / JCM 14847 / LMG 12228 / 1C / PRS 101 / PAO1) OX=208964 GN=PA2604 PE=3 SV=1
TRINITY_DN15885_c0_g1_i12	2	Y2552	BRUO2Putative ABC transporter peptide-binding protein BOV
TRINITY_DN97114_c0_g1_i1	2	Y2524	CUPNHUncharacterized symporter H16
TRINITY_DN16036_c0_g1_i1	2	Y2524	CUPNHUncharacterized symporter H16
TRINITY_DN130099_c0_g1_i1	2	Y2524	CUPNHUncharacterized symporter H16
TRINITY_DN34466_c0_g2_i6	2	Y2454	DICDISET and MYND domain-containing protein DDB
TRINITY_DN74981_c0_g1_i1	2	Y2453	MYCLEUncharacterized protein ML2453 OS=Mycobacterium leprae (strain TN) OX=272631 GN=ML2453 PE=3 SV=2
TRINITY_DN34121_c0_g2_i3	2	Y2340	DICDITNF receptor-associated factor family protein DDB
TRINITY_DN47419_c0_g1_i8	2	Y2340	DICDITNF receptor-associated factor family protein DDB
TRINITY_DN18133_c0_g1_i3	2	Y2340	DICDITNF receptor-associated factor family protein DDB
TRINITY_DN34121_c0_g2_i5	2	Y2340	DICDITNF receptor-associated factor family protein DDB
TRINITY_DN9097_c1_g1_i8	2	Y2289	ARATHProbable LRR receptor-like serine/threonine-protein kinase At2g28960 OS=Arabidopsis thaliana OX=3702 GN=At2g28960 PE=1 SV=1
TRINITY_DN143832_c0_g1_i1	2	Y2281	MYCTOPutative phosphate permease MT2339 OS=Mycobacterium tuberculosis (strain CDC 1551 / Oshkosh) OX=83331 GN=MT2339 PE=3 SV=1
TRINITY_DN78297_c0_g1_i1	2	Y2279	BACPEUncharacterized ABC transporter ATP-binding protein BpOF4
TRINITY_DN9786_c0_g1_i2	2	Y2194	DEIGDProbable transcriptional regulatory protein Dgeo
TRINITY_DN129928_c0_g1_i1	2	Y2124	NOSS1Uncharacterized WD repeat-containing protein all2124 OS=Nostoc sp. (strain PCC 7120 / SAG 25.82 / UTEX 2576) OX=103690 GN=all2124 PE=4 SV=1
TRINITY_DN78356_c0_g1_i1	2	Y2124	NOSS1Uncharacterized WD repeat-containing protein all2124 OS=Nostoc sp. (strain PCC 7120 / SAG 25.82 / UTEX 2576) OX=103690 GN=all2124 PE=4 SV=1
TRINITY_DN143397_c0_g1_i1	2	Y208	STRP3Probable ABC transporter ATP-binding protein SpyM3
TRINITY_DN114281_c0_g1_i1	2	Y1893	XYLFTUPF0394 membrane protein PD
TRINITY_DN78738_c0_g1_i1	2	Y1736	HAEINUncharacterized protein HI
TRINITY_DN96891_c0_g1_i1	2	Y1714	MYCTOUncharacterized oxidoreductase MT1753.1 OS=Mycobacterium tuberculosis (strain CDC 1551 / Oshkosh) OX=83331 GN=MT1753.1 PE=3 SV=1
TRINITY_DN70984_c0_g1_i1	2	Y1693	CLOPEPutative zinc metalloprotease CPE1693 OS=Clostridium perfringens (strain 13 / Type A) OX=195102 GN=CPE1693 PE=3 SV=1
TRINITY_DN47001_c0_g1_i1	2	Y1608	SYNY3Uncharacterized protein slr1608 OS=Synechocystis sp. (strain PCC 6803 / Kazusa) OX=1111708 GN=slr1608 PE=3 SV=1
TRINITY_DN646_c1_g1_i2	2	Y1581	CORU7Putative hydro-lyase cu1581 OS=Corynebacterium urealyticum (strain ATCC 43042 / DSM 7109) OX=504474 GN=cu1581 PE=3 SV=1
TRINITY_DN752_c0_g1_i5	2	Y1571	ARATHProbable leucine-rich repeat receptor-like protein kinase At1g35710 OS=Arabidopsis thaliana OX=3702 GN=At1g35710 PE=1 SV=1
TRINITY_DN132213_c0_g1_i1	2	Y1533	SACS2Putative dioxygenase SSO1533 OS=Saccharolobus solfataricus (strain ATCC 35092 / DSM 1617 / JCM 11322 / P2) OX=273057 GN=SSO1533 PE=3 SV=1
TRINITY_DN13402_c1_g1_i6	2	Y150	RICBRPutative ankyrin repeat protein RBE
TRINITY_DN32118_c0_g1_i2	2	Y1498	MYCTOUncharacterized protein MT1546 OS=Mycobacterium tuberculosis (strain CDC 1551 / Oshkosh) OX=83331 GN=MT1546 PE=4 SV=2
TRINITY_DN105018_c0_g1_i1	2	Y1495	METJAUncharacterized protein MJ1495 OS=Methanocaldococcus jannaschii (strain ATCC 43067 / DSM 2661 / JAL-1 / JCM 10045 / NBRC 100440) OX=243232 GN=MJ1495 PE=4 SV=1
TRINITY_DN141884_c0_g1_i1	2	Y1488	MYCTOUncharacterized protein MT1533.2 OS=Mycobacterium tuberculosis (strain CDC 1551 / Oshkosh) OX=83331 GN=MT1533.2 PE=3 SV=1
TRINITY_DN114527_c0_g1_i1	2	Y147	RICPRUncharacterized protein RP147 OS=Rickettsia prowazekii (strain Madrid E) OX=272947 GN=RP147 PE=3 SV=1
TRINITY_DN113614_c0_g1_i1	2	Y147	RICPRUncharacterized protein RP147 OS=Rickettsia prowazekii (strain Madrid E) OX=272947 GN=RP147 PE=3 SV=1
TRINITY_DN134842_c0_g1_i1	2	Y147	RICPRUncharacterized protein RP147 OS=Rickettsia prowazekii (strain Madrid E) OX=272947 GN=RP147 PE=3 SV=1
TRINITY_DN127318_c0_g1_i1	2	Y1461	MYCTOUPF0051 protein MT1508 OS=Mycobacterium tuberculosis (strain CDC 1551 / Oshkosh) OX=83331 GN=MT1508 PE=3 SV=1
TRINITY_DN66362_c0_g1_i1	2	Y1461	MYCTOUPF0051 protein MT1508 OS=Mycobacterium tuberculosis (strain CDC 1551 / Oshkosh) OX=83331 GN=MT1508 PE=3 SV=1
TRINITY_DN1733_c5_g1_i14	2	Y1420	CLOABProtein CA
TRINITY_DN136166_c0_g1_i1	2	Y1342	ARATHPHD finger protein At1g33420 OS=Arabidopsis thaliana OX=3702 GN=At1g33420 PE=1 SV=1
TRINITY_DN80834_c0_g1_i1	2	Y1337	AMOA5UPF0365 protein Aasi
TRINITY_DN8644_c0_g1_i14	2	Y132A	HAEINUncharacterized transposase-like protein HI
TRINITY_DN8644_c0_g1_i4	2	Y132A	HAEINUncharacterized transposase-like protein HI
TRINITY_DN145712_c0_g1_i1	2	Y1215	PYRHOProbable ABC transporter permease protein PH1215 OS=Pyrococcus horikoshii (strain ATCC 700860 / DSM 12428 / JCM 9974 / NBRC 100139 / OT-3) OX=70601 GN=PH1215 PE=3 SV=1
TRINITY_DN30756_c0_g1_i2	2	Y1214	PYRHOUncharacterized ABC transporter extracellular-binding protein PH1214 OS=Pyrococcus horikoshii (strain ATCC 700860 / DSM 12428 / JCM 9974 / NBRC 100139 / OT-3) OX=70601 GN=PH1214 PE=3 SV=1
TRINITY_DN13738_c0_g1_i5	2	Y1199	DICDIProbable serine/threonine-protein kinase DDB
TRINITY_DN122443_c0_g1_i1	2	Y1163	HAEINUncharacterized protein HI
TRINITY_DN24209_c0_g1_i1	2	Y1129	METJAUncharacterized protein MJ1129 OS=Methanocaldococcus jannaschii (strain ATCC 43067 / DSM 2661 / JAL-1 / JCM 10045 / NBRC 100440) OX=243232 GN=MJ1129 PE=4 SV=1
TRINITY_DN80293_c0_g1_i1	2	Y1080	HAEINProbable amino-acid ABC transporter-binding protein HI
TRINITY_DN138350_c0_g1_i1	2	Y1057	METJAUncharacterized glycosyltransferase MJ1057 OS=Methanocaldococcus jannaschii (strain ATCC 43067 / DSM 2661 / JAL-1 / JCM 10045 / NBRC 100440) OX=243232 GN=MJ1057 PE=3 SV=2
TRINITY_DN7202_c0_g1_i17	2	Y103	SYNY3Uncharacterized protein sll0103 OS=Synechocystis sp. (strain PCC 6803 / Kazusa) OX=1111708 GN=sll0103 PE=4 SV=1
TRINITY_DN51194_c0_g2_i1	2	Y1022	METTHPutative biopolymer transport protein ExbB homolog OS=Methanothermobacter thermautotrophicus (strain ATCC 29096 / DSM 1053 / JCM 10044 / NBRC 100330 / Delta H) OX=187420 GN=MTH
TRINITY_DN83478_c0_g1_i1	2	Y1022	METTHPutative biopolymer transport protein ExbB homolog OS=Methanothermobacter thermautotrophicus (strain ATCC 29096 / DSM 1053 / JCM 10044 / NBRC 100330 / Delta H) OX=187420 GN=MTH
TRINITY_DN921_c0_g1_i8	2	Y1017	SYNY3Putative ammonium transporter sll1017 OS=Synechocystis sp. (strain PCC 6803 / Kazusa) OX=1111708 GN=sll1017 PE=3 SV=1
TRINITY_DN26005_c0_g1_i2	2	Y0931	DICDITNF receptor-associated factor family protein DDB
TRINITY_DN371_c0_g1_i8	2	Y0931	DICDITNF receptor-associated factor family protein DDB
TRINITY_DN36289_c0_g1_i2	2	Y0931	DICDITNF receptor-associated factor family protein DDB
TRINITY_DN106766_c0_g1_i1	2	Y093	RHIMEUncharacterized transporter R00093 OS=Rhizobium meliloti (strain 1021) OX=266834 GN=R00093 PE=3 SV=1
TRINITY_DN63084_c0_g1_i1	2	Y0859	MYCTUPutative acyltransferase Rv0859 OS=Mycobacterium tuberculosis (strain ATCC 25618 / H37Rv) OX=83332 GN=fadA PE=1 SV=1
TRINITY_DN122826_c0_g1_i1	2	Y082	RICBRUncharacterized membrane protein RBE
TRINITY_DN921_c0_g1_i9	2	Y058	METJAPutative ammonium transporter MJ0058 OS=Methanocaldococcus jannaschii (strain ATCC 43067 / DSM 2661 / JAL-1 / JCM 10045 / NBRC 100440) OX=243232 GN=MJ0058 PE=3 SV=1
TRINITY_DN41445_c0_g1_i1	2	Y0019	DICDIProbable serine/threonine-protein kinase DDB
TRINITY_DN108959_c0_g1_i1	2	XYPA	MYCS2Xylitol-binding protein OS=Mycolicibacterium smegmatis (strain ATCC 700084 / mc(2)155) OX=246196 GN=xypA PE=1 SV=1
TRINITY_DN10756_c0_g1_i29	2	XYLT	LACBRD-xylose transporter OS=Lactobacillus brevis OX=1580 GN=xylT PE=1 SV=1
TRINITY_DN14100_c0_g1_i1	2	XYLF	HAEIND-xylose-binding periplasmic protein OS=Haemophilus influenzae (strain ATCC 51907 / DSM 11121 / KW20 / Rd) OX=71421 GN=xylF PE=3 SV=1
TRINITY_DN40834_c0_g1_i3	2	XYLF	ECOLID-xylose-binding periplasmic protein OS=Escherichia coli (strain K12) OX=83333 GN=xylF PE=1 SV=1
TRINITY_DN40834_c0_g1_i7	2	XYLF	ECOLID-xylose-binding periplasmic protein OS=Escherichia coli (strain K12) OX=83333 GN=xylF PE=1 SV=1
TRINITY_DN40834_c0_g1_i2	2	XYLF	ECOLID-xylose-binding periplasmic protein OS=Escherichia coli (strain K12) OX=83333 GN=xylF PE=1 SV=1
TRINITY_DN62955_c0_g1_i1	2	XYLE	ECO57D-xylose-proton symporter OS=Escherichia coli O157:H7 OX=83334 GN=xylE PE=3 SV=1
TRINITY_DN61232_c0_g1_i1	2	XYLE	ECO57D-xylose-proton symporter OS=Escherichia coli O157:H7 OX=83334 GN=xylE PE=3 SV=1
TRINITY_DN105404_c0_g1_i1	2	XYLD	CAUVCD-xylonate dehydratase OS=Caulobacter vibrioides (strain ATCC 19089 / CB15) OX=190650 GN=xylD PE=1 SV=1
TRINITY_DN5320_c0_g1_i2	2	XYL2	MEDSVBeta-xylosidase/alpha-L-arabinofuranosidase 2 OS=Medicago sativa subsp. varia OX=36902 GN=Xyl2 PE=2 SV=1
TRINITY_DN5320_c0_g2_i4	2	XYL1	MEDSVBeta-xylosidase/alpha-L-arabinofuranosidase 1 (Fragment) OS=Medicago sativa subsp. varia OX=36902 GN=Xyl1 PE=1 SV=1
TRINITY_DN90368_c0_g1_i1	2	XS20E	NEOPABifunctional acetylxylan esterase/xylanase XynS20E OS=Neocallimastix patriciarum OX=4758 GN=xynS20E PE=1 SV=1
TRINITY_DN94_c0_g1_i39	2	XRCC6	CHICKX-ray repair cross-complementing protein 5 OS=Gallus gallus OX=9031 GN=XRCC6 PE=2 SV=1
TRINITY_DN1517_c0_g1_i1	2	XRCC5	MOUSEX-ray repair cross-complementing protein 5 OS=Mus musculus OX=10090 GN=Xrcc5 PE=1 SV=4
TRINITY_DN1517_c0_g1_i6	2	XRCC5	DICDIX-ray repair cross-complementing protein 5 OS=Dictyostelium discoideum OX=44689 GN=ku80 PE=3 SV=1
TRINITY_DN9352_c0_g1_i10	2	XPR1	XENTRXenotropic and polytropic retrovirus receptor 1 homolog OS=Xenopus tropicalis OX=8364 GN=xpr1 PE=2 SV=1
TRINITY_DN9352_c0_g1_i1	2	XPR1	XENTRXenotropic and polytropic retrovirus receptor 1 homolog OS=Xenopus tropicalis OX=8364 GN=xpr1 PE=2 SV=1
TRINITY_DN9352_c0_g1_i13	2	XPR1	XENTRXenotropic and polytropic retrovirus receptor 1 homolog OS=Xenopus tropicalis OX=8364 GN=xpr1 PE=2 SV=1
TRINITY_DN2959_c0_g1_i16	2	XPP3	PONABXaa-Pro aminopeptidase 3 OS=Pongo abelii OX=9601 GN=XPNPEP3 PE=2 SV=1
TRINITY_DN2568_c0_g1_i8	2	XPO7A	XENLAExportin-7-A OS=Xenopus laevis OX=8355 GN=xpo7-a PE=1 SV=1
TRINITY_DN2568_c0_g1_i32	2	XPO7	CHICKExportin-7 OS=Gallus gallus OX=9031 GN=XPO7 PE=2 SV=1
TRINITY_DN11_c0_g1_i5	2	XPO6	MOUSEExportin-6 OS=Mus musculus OX=10090 GN=Xpo6 PE=1 SV=2
TRINITY_DN11_c0_g1_i14	2	XPO6	HUMANExportin-6 OS=Homo sapiens OX=9606 GN=XPO6 PE=1 SV=1
TRINITY_DN797_c1_g1_i30	2	XPO5	HUMANExportin-5 OS=Homo sapiens OX=9606 GN=XPO5 PE=1 SV=1
TRINITY_DN797_c1_g1_i32	2	XPO5	HUMANExportin-5 OS=Homo sapiens OX=9606 GN=XPO5 PE=1 SV=1
TRINITY_DN8977_c0_g1_i16	2	XPO4	HUMANExportin-4 OS=Homo sapiens OX=9606 GN=XPO4 PE=1 SV=2
TRINITY_DN7165_c0_g1_i1	2	XPO2	DROMEExportin-2 OS=Drosophila melanogaster OX=7227 GN=Cse1 PE=2 SV=2
TRINITY_DN9960_c0_g1_i1	2	XPO2	BOVINExportin-2 OS=Bos taurus OX=9913 GN=CSE1L PE=2 SV=1
TRINITY_DN219_c0_g1_i320	2	XPO1	HUMANExportin-1 OS=Homo sapiens OX=9606 GN=XPO1 PE=1 SV=1
TRINITY_DN1366_c0_g2_i18	2	XPO1	HUMANExportin-1 OS=Homo sapiens OX=9606 GN=XPO1 PE=1 SV=1
TRINITY_DN32813_c0_g1_i12	2	XOXF	PARDEPutative dehydrogenase XoxF OS=Paracoccus denitrificans OX=266 GN=xoxF PE=3 SV=2
TRINITY_DN32813_c0_g1_i13	2	XOXF	PARDEPutative dehydrogenase XoxF OS=Paracoccus denitrificans OX=266 GN=xoxF PE=3 SV=2
TRINITY_DN11117_c0_g1_i12	2	XIAP	XENTRE3 ubiquitin-protein ligase XIAP OS=Xenopus tropicalis OX=8364 GN=xiap PE=2 SV=1
TRINITY_DN81486_c0_g1_i1	2	XGCA	EMENIOligoxyloglucan-reducing end-specific xyloglucanase OS=Emericella nidulans (strain FGSC A4 / ATCC 38163 / CBS 112.46 / NRRL 194 / M139) OX=227321 GN=xgcA PE=1 SV=1
TRINITY_DN30354_c0_g1_i1	2	XG74	PAESPXyloglucanase OS=Paenibacillus sp. OX=58172 GN=xeg74 PE=1 SV=1
TRINITY_DN49828_c0_g1_i1	2	XG74	PAESPXyloglucanase OS=Paenibacillus sp. OX=58172 GN=xeg74 PE=1 SV=1
TRINITY_DN7533_c0_g1_i14	2	XG113	ARATHArabinosyltransferase XEG113 OS=Arabidopsis thaliana OX=3702 GN=XEG113 PE=2 SV=1
TRINITY_DN1482_c1_g1_i3	2	XDH1	HALVDD-xylose 1-dehydrogenase (NADP(+)) 1 OS=Haloferax volcanii (strain ATCC 29605 / DSM 3757 / JCM 8879 / NBRC 14742 / NCIMB 2012 / VKM B-1768 / DS2) OX=309800 GN=HVO
TRINITY_DN18092_c0_g1_i94	2	XDH1	ARATHXanthine dehydrogenase 1 OS=Arabidopsis thaliana OX=3702 GN=XDH1 PE=1 SV=1
TRINITY_DN129_c0_g1_i4	2	XDH	ORYSJXanthine dehydrogenase OS=Oryza sativa subsp. japonica OX=39947 GN=XDH PE=2 SV=1
TRINITY_DN25970_c0_g2_i1	2	XDH	FELCAXanthine dehydrogenase/oxidase OS=Felis catus OX=9685 GN=XDH PE=2 SV=3
TRINITY_DN129_c0_g1_i39	2	XDH	EMENIXanthine dehydrogenase OS=Emericella nidulans (strain FGSC A4 / ATCC 38163 / CBS 112.46 / NRRL 194 / M139) OX=227321 GN=hxA PE=2 SV=2
TRINITY_DN4916_c0_g1_i12	2	XDH	DROSUXanthine dehydrogenase OS=Drosophila subobscura OX=7241 GN=Xdh PE=3 SV=1
TRINITY_DN21760_c0_g1_i2	2	XDH	DROPSXanthine dehydrogenase OS=Drosophila pseudoobscura pseudoobscura OX=46245 GN=ry PE=3 SV=2
TRINITY_DN3445_c0_g1_i7	2	XDH	DICDIXanthine dehydrogenase OS=Dictyostelium discoideum OX=44689 GN=xdh PE=3 SV=1
TRINITY_DN39725_c0_g1_i1	2	XDH	CHICKXanthine dehydrogenase/oxidase OS=Gallus gallus OX=9031 GN=XDH PE=1 SV=1
TRINITY_DN2064_c1_g1_i30	2	XDH	CHICKXanthine dehydrogenase/oxidase OS=Gallus gallus OX=9031 GN=XDH PE=1 SV=1
TRINITY_DN39725_c0_g1_i4	2	XDH	CHICKXanthine dehydrogenase/oxidase OS=Gallus gallus OX=9031 GN=XDH PE=1 SV=1
TRINITY_DN3445_c0_g1_i5	2	XDH	CHICKXanthine dehydrogenase/oxidase OS=Gallus gallus OX=9031 GN=XDH PE=1 SV=1
TRINITY_DN39725_c0_g1_i7	2	XDH	CHICKXanthine dehydrogenase/oxidase OS=Gallus gallus OX=9031 GN=XDH PE=1 SV=1
TRINITY_DN33616_c0_g1_i2	2	XDH	CALVIXanthine dehydrogenase OS=Calliphora vicina OX=7373 GN=XDH PE=2 SV=1
TRINITY_DN9333_c0_g1_i16	2	XB36	ORYSJProbable E3 ubiquitin-protein ligase XBOS36 OS=Oryza sativa subsp. japonica OX=39947 GN=XBOS36 PE=2 SV=1
TRINITY_DN34795_c0_g1_i1	2	XB36	ORYSJProbable E3 ubiquitin-protein ligase XBOS36 OS=Oryza sativa subsp. japonica OX=39947 GN=XBOS36 PE=2 SV=1
TRINITY_DN6899_c1_g2_i1	2	XB36	ORYSJProbable E3 ubiquitin-protein ligase XBOS36 OS=Oryza sativa subsp. japonica OX=39947 GN=XBOS36 PE=2 SV=1
TRINITY_DN8110_c1_g1_i1	2	XB34	ARATHPutative E3 ubiquitin-protein ligase XBAT34 OS=Arabidopsis thaliana OX=3702 GN=XBAT34 PE=2 SV=1
TRINITY_DN25725_c0_g1_i63	2	XB33	ORYSJProbable E3 ubiquitin-protein ligase XBOS33 OS=Oryza sativa subsp. japonica OX=39947 GN=XBOS33 PE=2 SV=1
TRINITY_DN31329_c0_g1_i6	2	XB33	ORYSJProbable E3 ubiquitin-protein ligase XBOS33 OS=Oryza sativa subsp. japonica OX=39947 GN=XBOS33 PE=2 SV=1
TRINITY_DN16535_c0_g1_i9	2	XB33	ORYSJProbable E3 ubiquitin-protein ligase XBOS33 OS=Oryza sativa subsp. japonica OX=39947 GN=XBOS33 PE=2 SV=1
TRINITY_DN29118_c0_g1_i8	2	XB33	ORYSJProbable E3 ubiquitin-protein ligase XBOS33 OS=Oryza sativa subsp. japonica OX=39947 GN=XBOS33 PE=2 SV=1
TRINITY_DN31508_c2_g1_i1	2	XB33	ORYSJProbable E3 ubiquitin-protein ligase XBOS33 OS=Oryza sativa subsp. japonica OX=39947 GN=XBOS33 PE=2 SV=1
TRINITY_DN6070_c0_g1_i2	2	XB33	ARATHE3 ubiquitin-protein ligase XBAT33 OS=Arabidopsis thaliana OX=3702 GN=XBAT33 PE=2 SV=1
TRINITY_DN19410_c0_g1_i3	2	XB33	ARATHE3 ubiquitin-protein ligase XBAT33 OS=Arabidopsis thaliana OX=3702 GN=XBAT33 PE=2 SV=1
TRINITY_DN6070_c0_g1_i5	2	XB32	ORYSJProbable E3 ubiquitin-protein ligase XBOS32 OS=Oryza sativa subsp. japonica OX=39947 GN=XBOS32 PE=2 SV=2
TRINITY_DN6070_c0_g1_i14	2	XB32	ORYSJProbable E3 ubiquitin-protein ligase XBOS32 OS=Oryza sativa subsp. japonica OX=39947 GN=XBOS32 PE=2 SV=2
TRINITY_DN1947_c0_g1_i6	2	XB32	ARATHE3 ubiquitin-protein ligase XBAT32 OS=Arabidopsis thaliana OX=3702 GN=XBAT32 PE=1 SV=1
TRINITY_DN40998_c0_g1_i1	2	XANB	XANCBXanthan biosynthesis protein XanB OS=Xanthomonas campestris pv. campestris (strain B100) OX=509169 GN=xanB PE=3 SV=1
TRINITY_DN6629_c0_g1_i65	2	WTR43	ARATHWAT1-related protein At5g45370 OS=Arabidopsis thaliana OX=3702 GN=At5g45370 PE=2 SV=1
TRINITY_DN43410_c0_g1_i9	2	WTR25	ARATHWAT1-related protein At3g45870 OS=Arabidopsis thaliana OX=3702 GN=At3g45870 PE=2 SV=1
TRINITY_DN6629_c0_g1_i69	2	WTR25	ARATHWAT1-related protein At3g45870 OS=Arabidopsis thaliana OX=3702 GN=At3g45870 PE=2 SV=1
TRINITY_DN18300_c0_g1_i1	2	WTR25	ARATHWAT1-related protein At3g45870 OS=Arabidopsis thaliana OX=3702 GN=At3g45870 PE=2 SV=1
TRINITY_DN6629_c0_g1_i4	2	WTR25	ARATHWAT1-related protein At3g45870 OS=Arabidopsis thaliana OX=3702 GN=At3g45870 PE=2 SV=1
TRINITY_DN449_c0_g1_i5	2	WSDU1	DANREWD repeat, SAM and U-box domain-containing protein 1 OS=Danio rerio OX=7955 GN=wdsub1 PE=2 SV=1
TRINITY_DN1618_c0_g1_i19	2	WSDU1	DANREWD repeat, SAM and U-box domain-containing protein 1 OS=Danio rerio OX=7955 GN=wdsub1 PE=2 SV=1
TRINITY_DN28782_c0_g1_i1	2	WSCD	ANOGAWSCD family member AGAP003962 OS=Anopheles gambiae OX=7165 GN=AGAP003962 PE=3 SV=3
TRINITY_DN13934_c0_g1_i20	2	WRN	XENLAWerner syndrome ATP-dependent helicase homolog OS=Xenopus laevis OX=8355 GN=wrn PE=2 SV=1
TRINITY_DN2178_c0_g1_i16	2	WRN	MOUSEWerner syndrome ATP-dependent helicase homolog OS=Mus musculus OX=10090 GN=Wrn PE=1 SV=3
TRINITY_DN16311_c0_g1_i10	2	WRN	HUMANWerner syndrome ATP-dependent helicase OS=Homo sapiens OX=9606 GN=WRN PE=1 SV=2
TRINITY_DN16311_c0_g2_i1	2	WRN	HUMANWerner syndrome ATP-dependent helicase OS=Homo sapiens OX=9606 GN=WRN PE=1 SV=2
TRINITY_DN27802_c0_g1_i1	2	WRN	CAEELProbable Werner syndrome ATP-dependent helicase homolog 1 OS=Caenorhabditis elegans OX=6239 GN=wrn-1 PE=3 SV=2
TRINITY_DN5_c11_g1_i1	2	WRB	HUMANTail-anchored protein insertion receptor WRB OS=Homo sapiens OX=9606 GN=WRB PE=1 SV=2
TRINITY_DN5_c11_g1_i12	2	WRB	HUMANTail-anchored protein insertion receptor WRB OS=Homo sapiens OX=9606 GN=WRB PE=1 SV=2
TRINITY_DN10834_c0_g1_i3	2	WNT7B	HUMANProtein Wnt-7b OS=Homo sapiens OX=9606 GN=WNT7B PE=1 SV=2
TRINITY_DN12893_c0_g1_i12	2	WNK	CAEELSerine/threonine-protein kinase WNK OS=Caenorhabditis elegans OX=6239 GN=wnk-1 PE=1 SV=1
TRINITY_DN2152_c0_g1_i9	2	WIPI3	XENTRWD repeat domain phosphoinositide-interacting protein 3 OS=Xenopus tropicalis OX=8364 GN=wdr45b PE=2 SV=1
TRINITY_DN2152_c0_g1_i41	2	WIPI3	XENTRWD repeat domain phosphoinositide-interacting protein 3 OS=Xenopus tropicalis OX=8364 GN=wdr45b PE=2 SV=1
TRINITY_DN585_c0_g1_i21	2	WIPI2	MOUSEWD repeat domain phosphoinositide-interacting protein 2 OS=Mus musculus OX=10090 GN=Wipi2 PE=1 SV=1
TRINITY_DN162_c0_g1_i49	2	WIPI2	MOUSEWD repeat domain phosphoinositide-interacting protein 2 OS=Mus musculus OX=10090 GN=Wipi2 PE=1 SV=1
TRINITY_DN162_c0_g1_i68	2	WIPI2	MOUSEWD repeat domain phosphoinositide-interacting protein 2 OS=Mus musculus OX=10090 GN=Wipi2 PE=1 SV=1
TRINITY_DN585_c0_g1_i16	2	WIPI2	MOUSEWD repeat domain phosphoinositide-interacting protein 2 OS=Mus musculus OX=10090 GN=Wipi2 PE=1 SV=1
TRINITY_DN162_c0_g1_i57	2	WIPI2	MOUSEWD repeat domain phosphoinositide-interacting protein 2 OS=Mus musculus OX=10090 GN=Wipi2 PE=1 SV=1
TRINITY_DN3633_c0_g1_i12	2	WHRN	RATWhirlin OS=Rattus norvegicus OX=10116 GN=Whrn PE=1 SV=1
TRINITY_DN3633_c0_g1_i10	2	WHRN	RATWhirlin OS=Rattus norvegicus OX=10116 GN=Whrn PE=1 SV=1
TRINITY_DN40557_c0_g1_i2	2	WDR97	HUMANWD repeat-containing protein 97 OS=Homo sapiens OX=9606 GN=WDR97 PE=2 SV=2
TRINITY_DN1674_c0_g1_i20	2	WDR92	HUMANWD repeat-containing protein 92 OS=Homo sapiens OX=9606 GN=WDR92 PE=1 SV=1
TRINITY_DN5089_c0_g1_i13	2	WDR90	XENTRWD repeat-containing protein 90 OS=Xenopus tropicalis OX=8364 GN=wdr90 PE=2 SV=1
TRINITY_DN5089_c0_g1_i20	2	WDR90	XENTRWD repeat-containing protein 90 OS=Xenopus tropicalis OX=8364 GN=wdr90 PE=2 SV=1
TRINITY_DN12570_c0_g1_i11	2	WDR81	RATWD repeat-containing protein 81 OS=Rattus norvegicus OX=10116 GN=Wdr81 PE=3 SV=1
TRINITY_DN3849_c0_g1_i10	2	WDR78	HUMANWD repeat-containing protein 78 OS=Homo sapiens OX=9606 GN=WDR78 PE=2 SV=1
TRINITY_DN3849_c0_g1_i29	2	WDR78	HUMANWD repeat-containing protein 78 OS=Homo sapiens OX=9606 GN=WDR78 PE=2 SV=1
TRINITY_DN3849_c0_g1_i27	2	WDR78	HUMANWD repeat-containing protein 78 OS=Homo sapiens OX=9606 GN=WDR78 PE=2 SV=1
TRINITY_DN3660_c0_g1_i2	2	WDR75	MOUSEWD repeat-containing protein 75 OS=Mus musculus OX=10090 GN=Wdr75 PE=1 SV=1
TRINITY_DN9896_c0_g1_i2	2	WDR7	RATWD repeat-containing protein 7 OS=Rattus norvegicus OX=10116 GN=Wdr7 PE=1 SV=1
TRINITY_DN4126_c0_g1_i12	2	WDR62	PIGWD repeat-containing protein 62 OS=Sus scrofa OX=9823 GN=WDR62 PE=3 SV=1
TRINITY_DN4126_c0_g1_i5	2	WDR62	HUMANWD repeat-containing protein 62 OS=Homo sapiens OX=9606 GN=WDR62 PE=1 SV=4
TRINITY_DN4126_c0_g1_i4	2	WDR62	HUMANWD repeat-containing protein 62 OS=Homo sapiens OX=9606 GN=WDR62 PE=1 SV=4
TRINITY_DN2495_c0_g1_i17	2	WDR60	MOUSEWD repeat-containing protein 60 OS=Mus musculus OX=10090 GN=Wdr60 PE=1 SV=1
TRINITY_DN2495_c0_g1_i28	2	WDR60	HUMANWD repeat-containing protein 60 OS=Homo sapiens OX=9606 GN=WDR60 PE=1 SV=3
TRINITY_DN2495_c0_g1_i115	2	WDR60	HUMANWD repeat-containing protein 60 OS=Homo sapiens OX=9606 GN=WDR60 PE=1 SV=3
TRINITY_DN2747_c0_g1_i106	2	WDR49	HUMANWD repeat-containing protein 49 OS=Homo sapiens OX=9606 GN=WDR49 PE=2 SV=1
TRINITY_DN6369_c0_g1_i4	2	WDR49	HUMANWD repeat-containing protein 49 OS=Homo sapiens OX=9606 GN=WDR49 PE=2 SV=1
TRINITY_DN5623_c0_g1_i9	2	WDR48	XENTRWD repeat-containing protein 48 OS=Xenopus tropicalis OX=8364 GN=wdr48 PE=2 SV=1
TRINITY_DN2445_c0_g1_i12	2	WDR44	XENLAWD repeat-containing protein 44 OS=Xenopus laevis OX=8355 GN=wdr44 PE=2 SV=1
TRINITY_DN5388_c0_g1_i20	2	WDR41	MOUSEWD repeat-containing protein 41 OS=Mus musculus OX=10090 GN=Wdr41 PE=1 SV=1
TRINITY_DN5388_c0_g1_i11	2	WDR41	MOUSEWD repeat-containing protein 41 OS=Mus musculus OX=10090 GN=Wdr41 PE=1 SV=1
TRINITY_DN40_c0_g1_i102	2	WDR36	HUMANWD repeat-containing protein 36 OS=Homo sapiens OX=9606 GN=WDR36 PE=1 SV=1
TRINITY_DN15123_c1_g1_i1	2	WDR36	HUMANWD repeat-containing protein 36 OS=Homo sapiens OX=9606 GN=WDR36 PE=1 SV=1
TRINITY_DN23380_c2_g1_i2	2	WDR36	HUMANWD repeat-containing protein 36 OS=Homo sapiens OX=9606 GN=WDR36 PE=1 SV=1
TRINITY_DN15123_c1_g1_i2	2	WDR36	HUMANWD repeat-containing protein 36 OS=Homo sapiens OX=9606 GN=WDR36 PE=1 SV=1
TRINITY_DN23001_c0_g1_i15	2	WDR36	HUMANWD repeat-containing protein 36 OS=Homo sapiens OX=9606 GN=WDR36 PE=1 SV=1
TRINITY_DN23001_c0_g1_i9	2	WDR36	HUMANWD repeat-containing protein 36 OS=Homo sapiens OX=9606 GN=WDR36 PE=1 SV=1
TRINITY_DN23001_c0_g1_i12	2	WDR36	HUMANWD repeat-containing protein 36 OS=Homo sapiens OX=9606 GN=WDR36 PE=1 SV=1
TRINITY_DN23001_c0_g1_i3	2	WDR36	HUMANWD repeat-containing protein 36 OS=Homo sapiens OX=9606 GN=WDR36 PE=1 SV=1
TRINITY_DN40_c0_g1_i56	2	WDR36	HUMANWD repeat-containing protein 36 OS=Homo sapiens OX=9606 GN=WDR36 PE=1 SV=1
TRINITY_DN40_c0_g3_i1	2	WDR36	HUMANWD repeat-containing protein 36 OS=Homo sapiens OX=9606 GN=WDR36 PE=1 SV=1
TRINITY_DN40_c0_g1_i71	2	WDR36	HUMANWD repeat-containing protein 36 OS=Homo sapiens OX=9606 GN=WDR36 PE=1 SV=1
TRINITY_DN12568_c0_g1_i8	2	WDR34	MOUSEWD repeat-containing protein 34 OS=Mus musculus OX=10090 GN=Wdr34 PE=1 SV=2
TRINITY_DN2183_c0_g1_i3	2	WDR31	HUMANWD repeat-containing protein 31 OS=Homo sapiens OX=9606 GN=WDR31 PE=2 SV=1
TRINITY_DN2374_c0_g1_i34	2	WDR3	HUMANWD repeat-containing protein 3 OS=Homo sapiens OX=9606 GN=WDR3 PE=1 SV=1
TRINITY_DN2374_c0_g1_i14	2	WDR3	HUMANWD repeat-containing protein 3 OS=Homo sapiens OX=9606 GN=WDR3 PE=1 SV=1
TRINITY_DN6609_c0_g1_i2	2	WDR26	XENTRWD repeat-containing protein 26 OS=Xenopus tropicalis OX=8364 GN=wdr26 PE=2 SV=2
TRINITY_DN131_c1_g1_i40	2	WDR26	RATWD repeat-containing protein 26 OS=Rattus norvegicus OX=10116 GN=Wdr26 PE=3 SV=2
TRINITY_DN131_c1_g1_i65	2	WDR26	RATWD repeat-containing protein 26 OS=Rattus norvegicus OX=10116 GN=Wdr26 PE=3 SV=2
TRINITY_DN131_c1_g1_i64	2	WDR26	DANREWD repeat-containing protein 26 OS=Danio rerio OX=7955 GN=wdr26 PE=1 SV=1
TRINITY_DN7639_c0_g1_i74	2	WDR24	XENLAGATOR complex protein WDR24 OS=Xenopus laevis OX=8355 GN=wdr24 PE=2 SV=1
TRINITY_DN1632_c0_g1_i31	2	WDR19	MOUSEWD repeat-containing protein 19 OS=Mus musculus OX=10090 GN=Wdr19 PE=1 SV=1
TRINITY_DN1632_c0_g1_i327	2	WDR19	MOUSEWD repeat-containing protein 19 OS=Mus musculus OX=10090 GN=Wdr19 PE=1 SV=1
TRINITY_DN1632_c0_g1_i90	2	WDR19	MOUSEWD repeat-containing protein 19 OS=Mus musculus OX=10090 GN=Wdr19 PE=1 SV=1
TRINITY_DN1632_c0_g1_i117	2	WDR19	MOUSEWD repeat-containing protein 19 OS=Mus musculus OX=10090 GN=Wdr19 PE=1 SV=1
TRINITY_DN1632_c0_g1_i296	2	WDR19	MOUSEWD repeat-containing protein 19 OS=Mus musculus OX=10090 GN=Wdr19 PE=1 SV=1
TRINITY_DN1632_c0_g1_i393	2	WDR19	MOUSEWD repeat-containing protein 19 OS=Mus musculus OX=10090 GN=Wdr19 PE=1 SV=1
TRINITY_DN1632_c0_g1_i352	2	WDR19	MOUSEWD repeat-containing protein 19 OS=Mus musculus OX=10090 GN=Wdr19 PE=1 SV=1
TRINITY_DN1632_c0_g1_i281	2	WDR19	MOUSEWD repeat-containing protein 19 OS=Mus musculus OX=10090 GN=Wdr19 PE=1 SV=1
TRINITY_DN1632_c0_g1_i244	2	WDR19	MOUSEWD repeat-containing protein 19 OS=Mus musculus OX=10090 GN=Wdr19 PE=1 SV=1
TRINITY_DN16351_c0_g1_i1	2	WDR19	MOUSEWD repeat-containing protein 19 OS=Mus musculus OX=10090 GN=Wdr19 PE=1 SV=1
TRINITY_DN561_c1_g1_i45	2	WDR11	MOUSEWD repeat-containing protein 11 OS=Mus musculus OX=10090 GN=Wdr11 PE=1 SV=1
TRINITY_DN561_c1_g1_i201	2	WDR11	DANREWD repeat-containing protein 11 OS=Danio rerio OX=7955 GN=wdr11 PE=2 SV=1
TRINITY_DN22581_c0_g1_i2	2	WC11	BOVINAntigen WC1.1 OS=Bos taurus OX=9913 PE=2 SV=1
TRINITY_DN4464_c0_g1_i25	2	WC11	BOVINAntigen WC1.1 OS=Bos taurus OX=9913 PE=2 SV=1
TRINITY_DN40110_c0_g1_i1	2	WC11	BOVINAntigen WC1.1 OS=Bos taurus OX=9913 PE=2 SV=1
TRINITY_DN71294_c0_g1_i1	2	WBPE	PSEAEUDP-2-acetamido-2-deoxy-3-oxo-D-glucuronate aminotransferase OS=Pseudomonas aeruginosa (strain ATCC 15692 / DSM 22644 / CIP 104116 / JCM 14847 / LMG 12228 / 1C / PRS 101 / PAO1) OX=208964 GN=wbpE PE=1 SV=1
TRINITY_DN8341_c0_g1_i7	2	WASP	MOUSEWiskott-Aldrich syndrome protein homolog OS=Mus musculus OX=10090 GN=Was PE=1 SV=1
TRINITY_DN2713_c0_g1_i5	2	WASL	MOUSENeural Wiskott-Aldrich syndrome protein OS=Mus musculus OX=10090 GN=Wasl PE=1 SV=1
TRINITY_DN2713_c0_g1_i14	2	WASL	MOUSENeural Wiskott-Aldrich syndrome protein OS=Mus musculus OX=10090 GN=Wasl PE=1 SV=1
TRINITY_DN1006_c0_g1_i46	2	WASC5	XENTRWASH complex subunit 5 OS=Xenopus tropicalis OX=8364 GN=washc5 PE=2 SV=1
TRINITY_DN1006_c0_g1_i11	2	WASC5	XENTRWASH complex subunit 5 OS=Xenopus tropicalis OX=8364 GN=washc5 PE=2 SV=1
TRINITY_DN2398_c0_g1_i10	2	WASC4	MOUSEWASH complex subunit 4 OS=Mus musculus OX=10090 GN=Washc4 PE=1 SV=2
TRINITY_DN2398_c0_g1_i13	2	WASC4	HUMANWASH complex subunit 4 OS=Homo sapiens OX=9606 GN=WASHC4 PE=1 SV=2
TRINITY_DN31253_c0_g1_i18	2	WAKLR	ARATHWall-associated receptor kinase-like 21 OS=Arabidopsis thaliana OX=3702 GN=WAKL21 PE=2 SV=2
TRINITY_DN14070_c0_g1_i2	2	WAKLR	ARATHWall-associated receptor kinase-like 21 OS=Arabidopsis thaliana OX=3702 GN=WAKL21 PE=2 SV=2
TRINITY_DN15508_c0_g2_i3	2	WAKLI	ARATHWall-associated receptor kinase-like 22 OS=Arabidopsis thaliana OX=3702 GN=WAKL22 PE=2 SV=1
TRINITY_DN146559_c0_g1_i1	2	WAC	MOUSEWW domain-containing adapter protein with coiled-coil OS=Mus musculus OX=10090 GN=Wac PE=1 SV=2
TRINITY_DN1548_c0_g1_i6	2	VWKA	DICDIAlpha-protein kinase vwkA OS=Dictyostelium discoideum OX=44689 GN=vwkA PE=1 SV=1
TRINITY_DN1548_c0_g1_i11	2	VWKA	DICDIAlpha-protein kinase vwkA OS=Dictyostelium discoideum OX=44689 GN=vwkA PE=1 SV=1
TRINITY_DN4866_c0_g1_i22	2	VWKA	DICDIAlpha-protein kinase vwkA OS=Dictyostelium discoideum OX=44689 GN=vwkA PE=1 SV=1
TRINITY_DN2151_c0_g2_i1	2	VWKA	DICDIAlpha-protein kinase vwkA OS=Dictyostelium discoideum OX=44689 GN=vwkA PE=1 SV=1
TRINITY_DN3602_c0_g1_i9	2	VWKA	DICDIAlpha-protein kinase vwkA OS=Dictyostelium discoideum OX=44689 GN=vwkA PE=1 SV=1
TRINITY_DN2151_c1_g1_i1	2	VWKA	DICDIAlpha-protein kinase vwkA OS=Dictyostelium discoideum OX=44689 GN=vwkA PE=1 SV=1
TRINITY_DN3602_c0_g1_i7	2	VWKA	DICDIAlpha-protein kinase vwkA OS=Dictyostelium discoideum OX=44689 GN=vwkA PE=1 SV=1
TRINITY_DN2151_c0_g1_i34	2	VWKA	DICDIAlpha-protein kinase vwkA OS=Dictyostelium discoideum OX=44689 GN=vwkA PE=1 SV=1
TRINITY_DN2151_c0_g1_i26	2	VWKA	DICDIAlpha-protein kinase vwkA OS=Dictyostelium discoideum OX=44689 GN=vwkA PE=1 SV=1
TRINITY_DN18358_c0_g1_i14	2	VWDE	HUMANvon Willebrand factor D and EGF domain-containing protein OS=Homo sapiens OX=9606 GN=VWDE PE=2 SV=4
TRINITY_DN545_c0_g1_i9	2	VWA7	RATvon Willebrand factor A domain-containing protein 7 OS=Rattus norvegicus OX=10116 GN=Vwa7 PE=3 SV=1
TRINITY_DN2080_c0_g1_i3	2	VWA7	MOUSEvon Willebrand factor A domain-containing protein 7 OS=Mus musculus OX=10090 GN=Vwa7 PE=2 SV=1
TRINITY_DN9058_c0_g1_i1	2	VWA3A	MOUSEvon Willebrand factor A domain-containing protein 3A OS=Mus musculus OX=10090 GN=Vwa3a PE=2 SV=1
TRINITY_DN5715_c0_g2_i1	2	VW5B1	HUMANvon Willebrand factor A domain-containing protein 5B1 OS=Homo sapiens OX=9606 GN=VWA5B1 PE=1 SV=2
TRINITY_DN8272_c0_g1_i2	2	VTI1B	RATVesicle transport through interaction with t-SNAREs homolog 1B OS=Rattus norvegicus OX=10116 GN=Vti1b PE=1 SV=2
TRINITY_DN8272_c0_g1_i9	2	VTI1B	RATVesicle transport through interaction with t-SNAREs homolog 1B OS=Rattus norvegicus OX=10116 GN=Vti1b PE=1 SV=2
TRINITY_DN478_c1_g1_i2	2	VTI1A	HUMANVesicle transport through interaction with t-SNAREs homolog 1A OS=Homo sapiens OX=9606 GN=VTI1A PE=1 SV=2
TRINITY_DN1127_c0_g1_i56	2	VTA1	BOVINVacuolar protein sorting-associated protein VTA1 homolog OS=Bos taurus OX=9913 GN=VTA1 PE=2 SV=1
TRINITY_DN1127_c0_g1_i251	2	VTA1	BOVINVacuolar protein sorting-associated protein VTA1 homolog OS=Bos taurus OX=9913 GN=VTA1 PE=2 SV=1
TRINITY_DN2727_c0_g1_i12	2	VPS8	MOUSEVacuolar protein sorting-associated protein 8 homolog OS=Mus musculus OX=10090 GN=Vps8 PE=1 SV=1
TRINITY_DN12013_c0_g1_i7	2	VPS54	HUMANVacuolar protein sorting-associated protein 54 OS=Homo sapiens OX=9606 GN=VPS54 PE=1 SV=2
TRINITY_DN7868_c1_g1_i10	2	VPS52	CANLFVacuolar protein sorting-associated protein 52 homolog OS=Canis lupus familiaris OX=9615 GN=VPS52 PE=3 SV=1
TRINITY_DN30559_c0_g1_i12	2	VPS51	XENTRVacuolar protein sorting-associated protein 51 homolog OS=Xenopus tropicalis OX=8364 GN=vps51 PE=2 SV=1
TRINITY_DN4610_c0_g1_i60	2	VPS50	RATSyndetin OS=Rattus norvegicus OX=10116 GN=Vps50 PE=1 SV=1
TRINITY_DN4610_c0_g1_i72	2	VPS50	RATSyndetin OS=Rattus norvegicus OX=10116 GN=Vps50 PE=1 SV=1
TRINITY_DN11019_c0_g1_i1	2	VPS50	RATSyndetin OS=Rattus norvegicus OX=10116 GN=Vps50 PE=1 SV=1
TRINITY_DN4610_c0_g1_i13	2	VPS50	MOUSESyndetin OS=Mus musculus OX=10090 GN=Vps50 PE=1 SV=2
TRINITY_DN3871_c0_g1_i17	2	VPS4B	MOUSEVacuolar protein sorting-associated protein 4B OS=Mus musculus OX=10090 GN=Vps4b PE=1 SV=2
TRINITY_DN3871_c0_g1_i23	2	VPS4B	MOUSEVacuolar protein sorting-associated protein 4B OS=Mus musculus OX=10090 GN=Vps4b PE=1 SV=2
TRINITY_DN23506_c0_g1_i1	2	VPS4A	MOUSEVacuolar protein sorting-associated protein 4A OS=Mus musculus OX=10090 GN=Vps4a PE=1 SV=1
TRINITY_DN1939_c0_g1_i45	2	VPS41	MOUSEVacuolar protein sorting-associated protein 41 homolog OS=Mus musculus OX=10090 GN=Vps41 PE=1 SV=1
TRINITY_DN1939_c0_g1_i62	2	VPS41	HUMANVacuolar protein sorting-associated protein 41 homolog OS=Homo sapiens OX=9606 GN=VPS41 PE=1 SV=3
TRINITY_DN2023_c0_g1_i48	2	VPS39	MOUSEVam6/Vps39-like protein OS=Mus musculus OX=10090 GN=Vps39 PE=1 SV=1
TRINITY_DN2023_c0_g1_i35	2	VPS39	MOUSEVam6/Vps39-like protein OS=Mus musculus OX=10090 GN=Vps39 PE=1 SV=1
TRINITY_DN2023_c0_g1_i82	2	VPS39	MOUSEVam6/Vps39-like protein OS=Mus musculus OX=10090 GN=Vps39 PE=1 SV=1
TRINITY_DN17629_c0_g1_i1	2	VPS35	BOVINVacuolar protein sorting-associated protein 35 OS=Bos taurus OX=9913 GN=VPS35 PE=2 SV=1
TRINITY_DN3853_c0_g1_i2	2	VPS28	DROMEVacuolar protein sorting-associated protein 28 homolog OS=Drosophila melanogaster OX=7227 GN=Vps28 PE=1 SV=1
TRINITY_DN1119_c0_g1_i80	2	VPS18	DANREVacuolar protein sorting-associated protein 18 homolog OS=Danio rerio OX=7955 GN=vps18 PE=2 SV=2
TRINITY_DN1429_c0_g1_i108	2	VPS16	DICDIVacuolar protein sorting-associated protein 16 homolog OS=Dictyostelium discoideum OX=44689 GN=vps16 PE=3 SV=2
TRINITY_DN1429_c0_g1_i43	2	VPS16	BOVINVacuolar protein sorting-associated protein 16 homolog OS=Bos taurus OX=9913 GN=VPS16 PE=2 SV=1
TRINITY_DN1429_c0_g1_i155	2	VPS16	BOVINVacuolar protein sorting-associated protein 16 homolog OS=Bos taurus OX=9913 GN=VPS16 PE=2 SV=1
TRINITY_DN27012_c0_g1_i3	2	VPP1	RATV-type proton ATPase 116 kDa subunit a isoform 1 OS=Rattus norvegicus OX=10116 GN=Atp6v0a1 PE=2 SV=1
TRINITY_DN594_c0_g1_i19	2	VPP1	MOUSEV-type proton ATPase 116 kDa subunit a isoform 1 OS=Mus musculus OX=10090 GN=Atp6v0a1 PE=1 SV=3
TRINITY_DN594_c0_g1_i30	2	VPP1	MOUSEV-type proton ATPase 116 kDa subunit a isoform 1 OS=Mus musculus OX=10090 GN=Atp6v0a1 PE=1 SV=3
TRINITY_DN6998_c0_g1_i1	2	VP35L	RATVPS35 endosomal protein sorting factor-like OS=Rattus norvegicus OX=10116 GN=Vps35l PE=2 SV=1
TRINITY_DN4241_c0_g1_i9	2	VP35L	DANREVPS35 endosomal protein sorting factor-like OS=Danio rerio OX=7955 GN=vps35l PE=2 SV=1
TRINITY_DN4241_c0_g1_i6	2	VP35L	DANREVPS35 endosomal protein sorting factor-like OS=Danio rerio OX=7955 GN=vps35l PE=2 SV=1
TRINITY_DN9302_c0_g1_i11	2	VP26B	DANREVacuolar protein sorting-associated protein 26B OS=Danio rerio OX=7955 GN=vps26b PE=2 SV=1
TRINITY_DN22283_c0_g1_i2	2	VP13D	HUMANVacuolar protein sorting-associated protein 13D OS=Homo sapiens OX=9606 GN=VPS13D PE=1 SV=2
TRINITY_DN1150_c0_g1_i12	2	VP13D	HUMANVacuolar protein sorting-associated protein 13D OS=Homo sapiens OX=9606 GN=VPS13D PE=1 SV=2
TRINITY_DN1150_c0_g1_i3	2	VP13D	HUMANVacuolar protein sorting-associated protein 13D OS=Homo sapiens OX=9606 GN=VPS13D PE=1 SV=2
TRINITY_DN3359_c0_g1_i23	2	VP13C	MOUSEVacuolar protein sorting-associated protein 13C OS=Mus musculus OX=10090 GN=Vps13c PE=1 SV=2
TRINITY_DN23318_c0_g1_i4	2	VP13C	HUMANVacuolar protein sorting-associated protein 13C OS=Homo sapiens OX=9606 GN=VPS13C PE=1 SV=1
TRINITY_DN92_c0_g1_i10	2	VP13C	HUMANVacuolar protein sorting-associated protein 13C OS=Homo sapiens OX=9606 GN=VPS13C PE=1 SV=1
TRINITY_DN3359_c0_g1_i20	2	VP13C	HUMANVacuolar protein sorting-associated protein 13C OS=Homo sapiens OX=9606 GN=VPS13C PE=1 SV=1
TRINITY_DN92_c0_g1_i18	2	VP13C	HUMANVacuolar protein sorting-associated protein 13C OS=Homo sapiens OX=9606 GN=VPS13C PE=1 SV=1
TRINITY_DN92_c0_g1_i6	2	VP13C	HUMANVacuolar protein sorting-associated protein 13C OS=Homo sapiens OX=9606 GN=VPS13C PE=1 SV=1
TRINITY_DN3359_c0_g1_i1	2	VP13C	HUMANVacuolar protein sorting-associated protein 13C OS=Homo sapiens OX=9606 GN=VPS13C PE=1 SV=1
TRINITY_DN12436_c0_g1_i4	2	VP13B	HUMANVacuolar protein sorting-associated protein 13B OS=Homo sapiens OX=9606 GN=VPS13B PE=1 SV=2
TRINITY_DN24780_c0_g1_i26	2	VP13A	HUMANVacuolar protein sorting-associated protein 13A OS=Homo sapiens OX=9606 GN=VPS13A PE=1 SV=2
TRINITY_DN24780_c0_g1_i2	2	VP13A	HUMANVacuolar protein sorting-associated protein 13A OS=Homo sapiens OX=9606 GN=VPS13A PE=1 SV=2
TRINITY_DN24780_c0_g1_i28	2	VP13A	HUMANVacuolar protein sorting-associated protein 13A OS=Homo sapiens OX=9606 GN=VPS13A PE=1 SV=2
TRINITY_DN24780_c0_g1_i24	2	VP13A	HUMANVacuolar protein sorting-associated protein 13A OS=Homo sapiens OX=9606 GN=VPS13A PE=1 SV=2
TRINITY_DN5680_c0_g2_i6	2	VP13A	HUMANVacuolar protein sorting-associated protein 13A OS=Homo sapiens OX=9606 GN=VPS13A PE=1 SV=2
TRINITY_DN24780_c0_g1_i16	2	VP13A	HUMANVacuolar protein sorting-associated protein 13A OS=Homo sapiens OX=9606 GN=VPS13A PE=1 SV=2
TRINITY_DN3955_c0_g1_i15	2	VMA5A	HUMANvon Willebrand factor A domain-containing protein 5A OS=Homo sapiens OX=9606 GN=VWA5A PE=2 SV=2
TRINITY_DN3955_c0_g1_i14	2	VMA5A	HUMANvon Willebrand factor A domain-containing protein 5A OS=Homo sapiens OX=9606 GN=VWA5A PE=2 SV=2
TRINITY_DN3955_c0_g1_i1	2	VMA5A	HUMANvon Willebrand factor A domain-containing protein 5A OS=Homo sapiens OX=9606 GN=VWA5A PE=2 SV=2
TRINITY_DN11192_c0_g2_i1	2	VM3H1	PROFLZinc metalloproteinase-disintegrin-like HV1 OS=Protobothrops flavoviridis OX=88087 PE=1 SV=1
TRINITY_DN139647_c0_g1_i1	2	VM3	OPHHAZinc metalloproteinase-disintegrin-like ohanin OS=Ophiophagus hannah OX=8665 PE=1 SV=1
TRINITY_DN13272_c0_g1_i23	2	VLDLR	RABITVery low-density lipoprotein receptor OS=Oryctolagus cuniculus OX=9986 GN=VLDLR PE=2 SV=1
TRINITY_DN13272_c0_g1_i27	2	VLDLR	RABITVery low-density lipoprotein receptor OS=Oryctolagus cuniculus OX=9986 GN=VLDLR PE=2 SV=1
TRINITY_DN9205_c0_g1_i26	2	VKT5	ANEVIU-actitoxin-Avd3h OS=Anemonia viridis OX=51769 PE=3 SV=1
TRINITY_DN10256_c0_g2_i2	2	VITRN	MOUSEVitrin OS=Mus musculus OX=10090 GN=Vit PE=1 SV=2
TRINITY_DN383_c0_g1_i210	2	VIGLN	HUMANVigilin OS=Homo sapiens OX=9606 GN=HDLBP PE=1 SV=2
TRINITY_DN383_c0_g1_i139	2	VIGLN	HUMANVigilin OS=Homo sapiens OX=9606 GN=HDLBP PE=1 SV=2
TRINITY_DN383_c0_g1_i21	2	VIGLN	HUMANVigilin OS=Homo sapiens OX=9606 GN=HDLBP PE=1 SV=2
TRINITY_DN3157_c0_g1_i16	2	VGFR1	HUMANVascular endothelial growth factor receptor 1 OS=Homo sapiens OX=9606 GN=FLT1 PE=1 SV=2
TRINITY_DN583_c0_g1_i44	2	VDE	TOBACViolaxanthin de-epoxidase, chloroplastic OS=Nicotiana tabacum OX=4097 GN=VDE1 PE=2 SV=1
TRINITY_DN7541_c0_g1_i5	2	VDAC2	XENLAVoltage-dependent anion-selective channel protein 2 OS=Xenopus laevis OX=8355 GN=vdac2 PE=1 SV=1
TRINITY_DN708_c0_g1_i1	2	VCP	VACCCComplement control protein C3 OS=Vaccinia virus (strain Copenhagen) OX=10249 GN=C3L PE=1 SV=1
TRINITY_DN2553_c0_g1_i9	2	VCP	VACCCComplement control protein C3 OS=Vaccinia virus (strain Copenhagen) OX=10249 GN=C3L PE=1 SV=1
TRINITY_DN30195_c0_g1_i2	2	VCP	VACCCComplement control protein C3 OS=Vaccinia virus (strain Copenhagen) OX=10249 GN=C3L PE=1 SV=1
TRINITY_DN5501_c0_g1_i12	2	VCP	VACCCComplement control protein C3 OS=Vaccinia virus (strain Copenhagen) OX=10249 GN=C3L PE=1 SV=1
TRINITY_DN6624_c1_g1_i5	2	VCP	VACCCComplement control protein C3 OS=Vaccinia virus (strain Copenhagen) OX=10249 GN=C3L PE=1 SV=1
TRINITY_DN3778_c0_g1_i23	2	VCP	VACCCComplement control protein C3 OS=Vaccinia virus (strain Copenhagen) OX=10249 GN=C3L PE=1 SV=1
TRINITY_DN1378_c0_g1_i29	2	VCP	VACCCComplement control protein C3 OS=Vaccinia virus (strain Copenhagen) OX=10249 GN=C3L PE=1 SV=1
TRINITY_DN717_c0_g1_i3	2	VCP	VACCCComplement control protein C3 OS=Vaccinia virus (strain Copenhagen) OX=10249 GN=C3L PE=1 SV=1
TRINITY_DN24891_c0_g1_i10	2	VCAM1	HUMANVascular cell adhesion protein 1 OS=Homo sapiens OX=9606 GN=VCAM1 PE=1 SV=1
TRINITY_DN2040_c0_g1_i12	2	VAV3	MOUSEGuanine nucleotide exchange factor VAV3 OS=Mus musculus OX=10090 GN=Vav3 PE=1 SV=2
TRINITY_DN2040_c0_g1_i10	2	VAV2	HUMANGuanine nucleotide exchange factor VAV2 OS=Homo sapiens OX=9606 GN=VAV2 PE=1 SV=2
TRINITY_DN2040_c0_g1_i15	2	VAV2	HUMANGuanine nucleotide exchange factor VAV2 OS=Homo sapiens OX=9606 GN=VAV2 PE=1 SV=2
TRINITY_DN2415_c0_g1_i22	2	VATO	YEASTV-type proton ATPase subunit c'' OS=Saccharomyces cerevisiae (strain ATCC 204508 / S288c) OX=559292 GN=VMA16 PE=1 SV=1
TRINITY_DN46101_c0_g1_i1	2	VATL	TORMAV-type proton ATPase 16 kDa proteolipid subunit OS=Torpedo marmorata OX=7788 PE=1 SV=1
TRINITY_DN259_c0_g1_i3	2	VATL	MOUSEV-type proton ATPase 16 kDa proteolipid subunit OS=Mus musculus OX=10090 GN=Atp6v0c PE=1 SV=1
TRINITY_DN838_c0_g1_i18	2	VATF	ANOGAV-type proton ATPase subunit F OS=Anopheles gambiae OX=7165 GN=Vha14 PE=2 SV=2
TRINITY_DN4824_c0_g1_i11	2	VATD	SUBDOV-type proton ATPase subunit D OS=Suberites domuncula OX=55567 GN=VATPD PE=2 SV=1
TRINITY_DN4824_c0_g1_i39	2	VATD	SUBDOV-type proton ATPase subunit D OS=Suberites domuncula OX=55567 GN=VATPD PE=2 SV=1
TRINITY_DN13_c5_g1_i12	2	VATC1	XENLAV-type proton ATPase subunit C 1 OS=Xenopus laevis OX=8355 GN=atp6v1c1 PE=2 SV=1
TRINITY_DN13_c5_g1_i20	2	VATC	MANSEV-type proton ATPase subunit C OS=Manduca sexta OX=7130 PE=2 SV=1
TRINITY_DN9828_c0_g1_i2	2	VATA2	DROMEV-type proton ATPase catalytic subunit A isoform 2 OS=Drosophila melanogaster OX=7227 GN=Vha68-2 PE=1 SV=2
TRINITY_DN8061_c0_g1_i1	2	VAS1	DROMEV-type proton ATPase subunit S1 OS=Drosophila melanogaster OX=7227 GN=VhaAC45 PE=1 SV=1
TRINITY_DN2834_c0_g1_i49	2	VAMP7	MOUSEVesicle-associated membrane protein 7 OS=Mus musculus OX=10090 GN=Vamp7 PE=1 SV=1
TRINITY_DN2834_c0_g1_i39	2	VAMP7	MOUSEVesicle-associated membrane protein 7 OS=Mus musculus OX=10090 GN=Vamp7 PE=1 SV=1
TRINITY_DN2834_c0_g1_i4	2	VAMP7	MOUSEVesicle-associated membrane protein 7 OS=Mus musculus OX=10090 GN=Vamp7 PE=1 SV=1
TRINITY_DN62290_c0_g1_i1	2	VAFNB	MOUSEProtein ATP6V1FNB OS=Mus musculus OX=10090 GN=ATp6v1fnb PE=2 SV=1
TRINITY_DN867_c0_g1_i21	2	VAC14	CHICKProtein VAC14 homolog OS=Gallus gallus OX=9031 GN=VAC14 PE=2 SV=1
TRINITY_DN2526_c0_g1_i27	2	VA0E2	BOVINV-type proton ATPase subunit e 2 OS=Bos taurus OX=9913 GN=ATP6V0E2 PE=3 SV=1
TRINITY_DN11309_c2_g1_i1	2	V223	FOWPNPutative ankyrin repeat protein FPV223 OS=Fowlpox virus (strain NVSL) OX=928301 GN=FPV223 PE=4 SV=1
TRINITY_DN4616_c0_g1_i91	2	UVSSA	XENTRUV-stimulated scaffold protein A OS=Xenopus tropicalis OX=8364 GN=uvssa PE=2 SV=1
TRINITY_DN4616_c0_g1_i80	2	UVSSA	MOUSEUV-stimulated scaffold protein A OS=Mus musculus OX=10090 GN=Uvssa PE=1 SV=2
TRINITY_DN4616_c0_g1_i87	2	UVSSA	CHICKUV-stimulated scaffold protein A OS=Gallus gallus OX=9031 GN=UVSSA PE=3 SV=1
TRINITY_DN106568_c0_g1_i1	2	UVRA	CLOPEUvrABC system protein A OS=Clostridium perfringens (strain 13 / Type A) OX=195102 GN=uvrA PE=3 SV=1
TRINITY_DN9365_c0_g1_i8	2	UT14C	HUMANU3 small nucleolar RNA-associated protein 14 homolog C OS=Homo sapiens OX=9606 GN=UTP14C PE=1 SV=1
TRINITY_DN40921_c0_g1_i2	2	USO1	HUMANGeneral vesicular transport factor p115 OS=Homo sapiens OX=9606 GN=USO1 PE=1 SV=2
TRINITY_DN42598_c1_g1_i1	2	USH2A	RATUsherin OS=Rattus norvegicus OX=10116 GN=Ush2a PE=1 SV=2
TRINITY_DN973_c0_g1_i14	2	USH2A	RATUsherin OS=Rattus norvegicus OX=10116 GN=Ush2a PE=1 SV=2
TRINITY_DN387_c0_g1_i40	2	USH2A	MOUSEUsherin OS=Mus musculus OX=10090 GN=Ush2A PE=1 SV=2
TRINITY_DN20233_c0_g1_i6	2	USH2A	MOUSEUsherin OS=Mus musculus OX=10090 GN=Ush2A PE=1 SV=2
TRINITY_DN973_c0_g1_i21	2	USH2A	MOUSEUsherin OS=Mus musculus OX=10090 GN=Ush2A PE=1 SV=2
TRINITY_DN5088_c0_g1_i6	2	USH2A	MOUSEUsherin OS=Mus musculus OX=10090 GN=Ush2A PE=1 SV=2
TRINITY_DN13514_c0_g1_i1	2	USH2A	MOUSEUsherin OS=Mus musculus OX=10090 GN=Ush2A PE=1 SV=2
TRINITY_DN16179_c0_g1_i1	2	USH2A	HUMANUsherin OS=Homo sapiens OX=9606 GN=USH2A PE=1 SV=3
TRINITY_DN34889_c1_g1_i8	2	US6NL	MOUSEUSP6 N-terminal-like protein OS=Mus musculus OX=10090 GN=Usp6nl PE=1 SV=2
TRINITY_DN34889_c1_g1_i7	2	US6NL	MOUSEUSP6 N-terminal-like protein OS=Mus musculus OX=10090 GN=Usp6nl PE=1 SV=2
TRINITY_DN3382_c0_g1_i32	2	UROM	RATUromodulin OS=Rattus norvegicus OX=10116 GN=Umod PE=2 SV=1
TRINITY_DN1580_c0_g1_i37	2	UROM	RATUromodulin OS=Rattus norvegicus OX=10116 GN=Umod PE=2 SV=1
TRINITY_DN1580_c0_g1_i23	2	UROM	RATUromodulin OS=Rattus norvegicus OX=10116 GN=Umod PE=2 SV=1
TRINITY_DN16956_c1_g1_i3	2	UROM	RATUromodulin OS=Rattus norvegicus OX=10116 GN=Umod PE=2 SV=1
TRINITY_DN18576_c0_g1_i2	2	UROM	MOUSEUromodulin OS=Mus musculus OX=10090 GN=Umod PE=1 SV=1
TRINITY_DN4248_c0_g1_i15	2	UROM	CANLFUromodulin OS=Canis lupus familiaris OX=9615 GN=UMOD PE=2 SV=1
TRINITY_DN5186_c0_g1_i2	2	URM1	CHICKUbiquitin-related modifier 1 OS=Gallus gallus OX=9031 GN=URM1 PE=3 SV=1
TRINITY_DN4764_c0_g1_i22	2	URIC	DANREUricase OS=Danio rerio OX=7955 GN=uox PE=1 SV=1
TRINITY_DN905_c0_g1_i19	2	URFB1	HUMANUHRF1-binding protein 1 OS=Homo sapiens OX=9606 GN=UHRF1BP1 PE=1 SV=1
TRINITY_DN9552_c0_g1_i32	2	UPP1	HUMANUridine phosphorylase 1 OS=Homo sapiens OX=9606 GN=UPP1 PE=1 SV=1
TRINITY_DN110_c0_g1_i222	2	UPP	DANREUracil phosphoribosyltransferase homolog OS=Danio rerio OX=7955 GN=uprt PE=2 SV=1
TRINITY_DN1293_c2_g1_i8	2	UNC89	CAEELMuscle M-line assembly protein unc-89 OS=Caenorhabditis elegans OX=6239 GN=unc-89 PE=1 SV=3
TRINITY_DN22798_c0_g1_i2	2	UNC89	CAEELMuscle M-line assembly protein unc-89 OS=Caenorhabditis elegans OX=6239 GN=unc-89 PE=1 SV=3
TRINITY_DN1967_c0_g1_i15	2	UNC89	CAEELMuscle M-line assembly protein unc-89 OS=Caenorhabditis elegans OX=6239 GN=unc-89 PE=1 SV=3
TRINITY_DN73_c3_g1_i21	2	UNC89	CAEELMuscle M-line assembly protein unc-89 OS=Caenorhabditis elegans OX=6239 GN=unc-89 PE=1 SV=3
TRINITY_DN243_c8_g1_i18	2	UNC89	CAEELMuscle M-line assembly protein unc-89 OS=Caenorhabditis elegans OX=6239 GN=unc-89 PE=1 SV=3
TRINITY_DN44343_c0_g1_i10	2	UNC89	CAEELMuscle M-line assembly protein unc-89 OS=Caenorhabditis elegans OX=6239 GN=unc-89 PE=1 SV=3
TRINITY_DN3224_c0_g1_i17	2	UNC89	CAEELMuscle M-line assembly protein unc-89 OS=Caenorhabditis elegans OX=6239 GN=unc-89 PE=1 SV=3
TRINITY_DN1451_c0_g1_i9	2	UN13B	MOUSEProtein unc-13 homolog B OS=Mus musculus OX=10090 GN=Unc13b PE=1 SV=2
TRINITY_DN1451_c0_g1_i8	2	UN13B	MOUSEProtein unc-13 homolog B OS=Mus musculus OX=10090 GN=Unc13b PE=1 SV=2
TRINITY_DN7506_c0_g1_i15	2	UMPS	PONABUridine 5'-monophosphate synthase OS=Pongo abelii OX=9601 GN=UMPS PE=2 SV=1
TRINITY_DN7506_c0_g1_i11	2	UMPS	PONABUridine 5'-monophosphate synthase OS=Pongo abelii OX=9601 GN=UMPS PE=2 SV=1
TRINITY_DN3619_c0_g1_i1	2	ULK4	PONABSerine/threonine-protein kinase ULK4 OS=Pongo abelii OX=9601 GN=ULK4 PE=2 SV=1
TRINITY_DN414_c0_g1_i53	2	ULK1	HUMANSerine/threonine-protein kinase ULK1 OS=Homo sapiens OX=9606 GN=ULK1 PE=1 SV=2
TRINITY_DN414_c0_g1_i59	2	ULK1	HUMANSerine/threonine-protein kinase ULK1 OS=Homo sapiens OX=9606 GN=ULK1 PE=1 SV=2
TRINITY_DN10204_c0_g1_i1	2	ULA1	XENLANEDD8-activating enzyme E1 regulatory subunit OS=Xenopus laevis OX=8355 GN=nae1 PE=2 SV=1
TRINITY_DN56514_c0_g1_i1	2	UHRF1	XENLAE3 ubiquitin-protein ligase UHRF1 OS=Xenopus laevis OX=8355 GN=uhrf1 PE=2 SV=1
TRINITY_DN18336_c0_g2_i3	2	UHRF1	HUMANE3 ubiquitin-protein ligase UHRF1 OS=Homo sapiens OX=9606 GN=UHRF1 PE=1 SV=1
TRINITY_DN26054_c1_g1_i1	2	UHRF1	DANREE3 ubiquitin-protein ligase UHRF1 OS=Danio rerio OX=7955 GN=uhrf1 PE=1 SV=1
TRINITY_DN905_c0_g1_i2	2	UH1BL	MOUSEUHRF1-binding protein 1-like OS=Mus musculus OX=10090 GN=Uhrf1bp1l PE=1 SV=2
TRINITY_DN6079_c0_g1_i17	2	UGPA	BOVINUTP--glucose-1-phosphate uridylyltransferase OS=Bos taurus OX=9913 GN=UGP2 PE=1 SV=2
TRINITY_DN1409_c1_g1_i5	2	UGGG1	RATUDP-glucose:glycoprotein glucosyltransferase 1 OS=Rattus norvegicus OX=10116 GN=Uggt1 PE=1 SV=2
TRINITY_DN1433_c0_g1_i29	2	UFSP2	PONABUfm1-specific protease 2 OS=Pongo abelii OX=9601 GN=UFSP2 PE=2 SV=3
TRINITY_DN4381_c0_g1_i98	2	UFSP1	DROMEProbable Ufm1-specific protease 1 OS=Drosophila melanogaster OX=7227 GN=UFSP1 PE=1 SV=1
TRINITY_DN3109_c0_g1_i2	2	UFD1	HUMANUbiquitin recognition factor in ER-associated degradation protein 1 OS=Homo sapiens OX=9606 GN=UFD1 PE=1 SV=3
TRINITY_DN2753_c0_g1_i69	2	UFC1	NEMVEUbiquitin-fold modifier-conjugating enzyme 1 OS=Nematostella vectensis OX=45351 GN=v1g214407 PE=3 SV=1
TRINITY_DN2055_c0_g1_i6	2	UD16	HUMANUDP-glucuronosyltransferase 1-6 OS=Homo sapiens OX=9606 GN=UGT1A6 PE=1 SV=2
TRINITY_DN2364_c0_g1_i13	2	UD16	HUMANUDP-glucuronosyltransferase 1-6 OS=Homo sapiens OX=9606 GN=UGT1A6 PE=1 SV=2
TRINITY_DN2364_c0_g1_i11	2	UD110	HUMANUDP-glucuronosyltransferase 1-10 OS=Homo sapiens OX=9606 GN=UGT1A10 PE=1 SV=1
TRINITY_DN2364_c0_g1_i24	2	UD11	HUMANUDP-glucuronosyltransferase 1-1 OS=Homo sapiens OX=9606 GN=UGT1A1 PE=1 SV=1
TRINITY_DN2417_c1_g1_i8	2	UCRI	AOTAZCytochrome b-c1 complex subunit Rieske, mitochondrial OS=Aotus azarae OX=30591 GN=UQCRFS1 PE=3 SV=1
TRINITY_DN6950_c0_g1_i11	2	UCKL1	HUMANUridine-cytidine kinase-like 1 OS=Homo sapiens OX=9606 GN=UCKL1 PE=1 SV=2
TRINITY_DN1924_c0_g1_i11	2	UCHL5	MOUSEUbiquitin carboxyl-terminal hydrolase isozyme L5 OS=Mus musculus OX=10090 GN=Uchl5 PE=1 SV=2
TRINITY_DN33155_c0_g1_i7	2	UCHL3	HUMANUbiquitin carboxyl-terminal hydrolase isozyme L3 OS=Homo sapiens OX=9606 GN=UCHL3 PE=1 SV=1
TRINITY_DN6805_c0_g1_i36	2	UBX11	MOUSEUBX domain-containing protein 11 OS=Mus musculus OX=10090 GN=Ubxn11 PE=1 SV=1
TRINITY_DN5814_c0_g1_i10	2	UBR5	RATE3 ubiquitin-protein ligase UBR5 OS=Rattus norvegicus OX=10116 GN=Ubr5 PE=1 SV=3
TRINITY_DN5814_c0_g1_i7	2	UBR5	MOUSEE3 ubiquitin-protein ligase UBR5 OS=Mus musculus OX=10090 GN=Ubr5 PE=1 SV=2
TRINITY_DN23454_c0_g1_i12	2	UBR4	MOUSEE3 ubiquitin-protein ligase UBR4 OS=Mus musculus OX=10090 GN=Ubr4 PE=1 SV=1
TRINITY_DN17253_c0_g1_i1	2	UBR4	MOUSEE3 ubiquitin-protein ligase UBR4 OS=Mus musculus OX=10090 GN=Ubr4 PE=1 SV=1
TRINITY_DN891_c1_g1_i19	2	UBR4	HUMANE3 ubiquitin-protein ligase UBR4 OS=Homo sapiens OX=9606 GN=UBR4 PE=1 SV=1
TRINITY_DN13198_c0_g1_i16	2	UBR4	HUMANE3 ubiquitin-protein ligase UBR4 OS=Homo sapiens OX=9606 GN=UBR4 PE=1 SV=1
TRINITY_DN891_c1_g1_i23	2	UBR4	HUMANE3 ubiquitin-protein ligase UBR4 OS=Homo sapiens OX=9606 GN=UBR4 PE=1 SV=1
TRINITY_DN26863_c1_g1_i1	2	UBR4	HUMANE3 ubiquitin-protein ligase UBR4 OS=Homo sapiens OX=9606 GN=UBR4 PE=1 SV=1
TRINITY_DN6488_c0_g1_i8	2	UBQL1	HUMANUbiquilin-1 OS=Homo sapiens OX=9606 GN=UBQLN1 PE=1 SV=2
TRINITY_DN1670_c1_g1_i13	2	UBQ9	ARATHPolyubiquitin 9 OS=Arabidopsis thaliana OX=3702 GN=UBQ9 PE=3 SV=1
TRINITY_DN1670_c1_g1_i5	2	UBQ9	ARATHPolyubiquitin 9 OS=Arabidopsis thaliana OX=3702 GN=UBQ9 PE=3 SV=1
TRINITY_DN2915_c1_g1_i3	2	UBP8	HUMANUbiquitin carboxyl-terminal hydrolase 8 OS=Homo sapiens OX=9606 GN=USP8 PE=1 SV=1
TRINITY_DN1508_c0_g1_i12	2	UBP7	CHICKUbiquitin carboxyl-terminal hydrolase 7 OS=Gallus gallus OX=9031 GN=USP7 PE=2 SV=1
TRINITY_DN2820_c0_g1_i1	2	UBP54	MOUSEInactive ubiquitin carboxyl-terminal hydrolase 54 OS=Mus musculus OX=10090 GN=Usp54 PE=1 SV=2
TRINITY_DN34375_c1_g1_i1	2	UBP5	HUMANUbiquitin carboxyl-terminal hydrolase 5 OS=Homo sapiens OX=9606 GN=USP5 PE=1 SV=2
TRINITY_DN1732_c0_g1_i36	2	UBP5	HUMANUbiquitin carboxyl-terminal hydrolase 5 OS=Homo sapiens OX=9606 GN=USP5 PE=1 SV=2
TRINITY_DN16253_c0_g1_i84	2	UBP47	CHICKUbiquitin carboxyl-terminal hydrolase 47 OS=Gallus gallus OX=9031 GN=USP47 PE=3 SV=1
TRINITY_DN3739_c1_g1_i16	2	UBP46	RATUbiquitin carboxyl-terminal hydrolase 46 OS=Rattus norvegicus OX=10116 GN=Usp46 PE=1 SV=2
TRINITY_DN28955_c0_g1_i1	2	UBP43	MOUSEUbiquitin carboxyl-terminal hydrolase 43 OS=Mus musculus OX=10090 GN=Usp43 PE=1 SV=2
TRINITY_DN3789_c0_g1_i5	2	UBP42	MOUSEUbiquitin carboxyl-terminal hydrolase 42 OS=Mus musculus OX=10090 GN=Usp42 PE=1 SV=1
TRINITY_DN32974_c0_g1_i3	2	UBP40	MOUSEUbiquitin carboxyl-terminal hydrolase 40 OS=Mus musculus OX=10090 GN=Usp40 PE=1 SV=2
TRINITY_DN23809_c0_g1_i8	2	UBP40	MOUSEUbiquitin carboxyl-terminal hydrolase 40 OS=Mus musculus OX=10090 GN=Usp40 PE=1 SV=2
TRINITY_DN23809_c0_g1_i12	2	UBP40	MOUSEUbiquitin carboxyl-terminal hydrolase 40 OS=Mus musculus OX=10090 GN=Usp40 PE=1 SV=2
TRINITY_DN202_c5_g1_i6	2	UBP40	MOUSEUbiquitin carboxyl-terminal hydrolase 40 OS=Mus musculus OX=10090 GN=Usp40 PE=1 SV=2
TRINITY_DN32312_c0_g1_i5	2	UBP40	HUMANUbiquitin carboxyl-terminal hydrolase 40 OS=Homo sapiens OX=9606 GN=USP40 PE=1 SV=3
TRINITY_DN32312_c0_g1_i1	2	UBP40	HUMANUbiquitin carboxyl-terminal hydrolase 40 OS=Homo sapiens OX=9606 GN=USP40 PE=1 SV=3
TRINITY_DN53561_c0_g1_i12	2	UBP40	HUMANUbiquitin carboxyl-terminal hydrolase 40 OS=Homo sapiens OX=9606 GN=USP40 PE=1 SV=3
TRINITY_DN12609_c0_g2_i1	2	UBP40	HUMANUbiquitin carboxyl-terminal hydrolase 40 OS=Homo sapiens OX=9606 GN=USP40 PE=1 SV=3
TRINITY_DN53561_c0_g1_i3	2	UBP40	HUMANUbiquitin carboxyl-terminal hydrolase 40 OS=Homo sapiens OX=9606 GN=USP40 PE=1 SV=3
TRINITY_DN22144_c0_g1_i3	2	UBP4	RATUbiquitin carboxyl-terminal hydrolase 4 OS=Rattus norvegicus OX=10116 GN=Usp4 PE=1 SV=1
TRINITY_DN52738_c0_g1_i1	2	UBP4	HUMANUbiquitin carboxyl-terminal hydrolase 4 OS=Homo sapiens OX=9606 GN=USP4 PE=1 SV=3
TRINITY_DN96_c0_g1_i30	2	UBP4	BOVINUbiquitin carboxyl-terminal hydrolase 4 OS=Bos taurus OX=9913 GN=USP4 PE=2 SV=1
TRINITY_DN22144_c0_g1_i5	2	UBP4	BOVINUbiquitin carboxyl-terminal hydrolase 4 OS=Bos taurus OX=9913 GN=USP4 PE=2 SV=1
TRINITY_DN7069_c0_g1_i59	2	UBP36	HUMANUbiquitin carboxyl-terminal hydrolase 36 OS=Homo sapiens OX=9606 GN=USP36 PE=1 SV=4
TRINITY_DN96_c0_g1_i8	2	UBP32	HUMANUbiquitin carboxyl-terminal hydrolase 32 OS=Homo sapiens OX=9606 GN=USP32 PE=1 SV=1
TRINITY_DN96_c0_g1_i29	2	UBP32	HUMANUbiquitin carboxyl-terminal hydrolase 32 OS=Homo sapiens OX=9606 GN=USP32 PE=1 SV=1
TRINITY_DN2283_c0_g1_i1	2	UBP24	MOUSEUbiquitin carboxyl-terminal hydrolase 24 OS=Mus musculus OX=10090 GN=Usp24 PE=1 SV=1
TRINITY_DN2884_c0_g1_i93	2	UBP2	HUMANUbiquitin carboxyl-terminal hydrolase 2 OS=Homo sapiens OX=9606 GN=USP2 PE=1 SV=2
TRINITY_DN2884_c0_g1_i112	2	UBP2	HUMANUbiquitin carboxyl-terminal hydrolase 2 OS=Homo sapiens OX=9606 GN=USP2 PE=1 SV=2
TRINITY_DN2884_c0_g1_i42	2	UBP2	HUMANUbiquitin carboxyl-terminal hydrolase 2 OS=Homo sapiens OX=9606 GN=USP2 PE=1 SV=2
TRINITY_DN6384_c1_g1_i5	2	UBP19	HUMANUbiquitin carboxyl-terminal hydrolase 19 OS=Homo sapiens OX=9606 GN=USP19 PE=1 SV=2
TRINITY_DN19452_c2_g1_i1	2	UBP15	XENTRUbiquitin carboxyl-terminal hydrolase 15 OS=Xenopus tropicalis OX=8364 GN=usp15 PE=2 SV=2
TRINITY_DN52738_c1_g2_i1	2	UBP15	XENTRUbiquitin carboxyl-terminal hydrolase 15 OS=Xenopus tropicalis OX=8364 GN=usp15 PE=2 SV=2
TRINITY_DN23042_c0_g1_i3	2	UBP15	RATUbiquitin carboxyl-terminal hydrolase 15 OS=Rattus norvegicus OX=10116 GN=Usp15 PE=1 SV=1
TRINITY_DN5141_c0_g1_i4	2	UBP15	RATUbiquitin carboxyl-terminal hydrolase 15 OS=Rattus norvegicus OX=10116 GN=Usp15 PE=1 SV=1
TRINITY_DN7717_c0_g1_i5	2	UBP15	RATUbiquitin carboxyl-terminal hydrolase 15 OS=Rattus norvegicus OX=10116 GN=Usp15 PE=1 SV=1
TRINITY_DN19128_c0_g1_i1	2	UBP15	RATUbiquitin carboxyl-terminal hydrolase 15 OS=Rattus norvegicus OX=10116 GN=Usp15 PE=1 SV=1
TRINITY_DN25498_c0_g1_i7	2	UBP15	RATUbiquitin carboxyl-terminal hydrolase 15 OS=Rattus norvegicus OX=10116 GN=Usp15 PE=1 SV=1
TRINITY_DN7717_c0_g1_i8	2	UBP15	HUMANUbiquitin carboxyl-terminal hydrolase 15 OS=Homo sapiens OX=9606 GN=USP15 PE=1 SV=3
TRINITY_DN6312_c0_g1_i1	2	UBP15	BOVINUbiquitin carboxyl-terminal hydrolase 15 OS=Bos taurus OX=9913 GN=USP15 PE=2 SV=1
TRINITY_DN16209_c0_g1_i1	2	UBP15	BOVINUbiquitin carboxyl-terminal hydrolase 15 OS=Bos taurus OX=9913 GN=USP15 PE=2 SV=1
TRINITY_DN5013_c0_g1_i8	2	UBP13	ARATHUbiquitin carboxyl-terminal hydrolase 13 OS=Arabidopsis thaliana OX=3702 GN=UBP13 PE=1 SV=1
TRINITY_DN14888_c0_g1_i28	2	UBP10	XENTRUbiquitin carboxyl-terminal hydrolase 10 OS=Xenopus tropicalis OX=8364 GN=usp10 PE=2 SV=1
TRINITY_DN14888_c0_g1_i19	2	UBP10	XENTRUbiquitin carboxyl-terminal hydrolase 10 OS=Xenopus tropicalis OX=8364 GN=usp10 PE=2 SV=1
TRINITY_DN11307_c0_g1_i21	2	UBL7	BOVINUbiquitin-like protein 7 OS=Bos taurus OX=9913 GN=UBL7 PE=2 SV=1
TRINITY_DN40092_c0_g1_i12	2	UBIQP	XENLAPolyubiquitin (Fragment) OS=Xenopus laevis OX=8355 PE=1 SV=2
TRINITY_DN3412_c0_g1_i10	2	UBIQP	XENLAPolyubiquitin (Fragment) OS=Xenopus laevis OX=8355 PE=1 SV=2
TRINITY_DN17089_c0_g1_i22	2	UBIQD	DICDIPolyubiquitin-D OS=Dictyostelium discoideum OX=44689 GN=ubqD PE=1 SV=1
TRINITY_DN17089_c0_g1_i32	2	UBIQD	DICDIPolyubiquitin-D OS=Dictyostelium discoideum OX=44689 GN=ubqD PE=1 SV=1
TRINITY_DN1670_c0_g1_i17	2	UBIQ	ENCCUUbiquitin OS=Encephalitozoon cuniculi (strain GB-M1) OX=284813 GN=ECU02
TRINITY_DN28040_c0_g2_i1	2	UBIQ	ENCCUUbiquitin OS=Encephalitozoon cuniculi (strain GB-M1) OX=284813 GN=ECU02
TRINITY_DN2030_c0_g1_i1	2	UBIQ	ENCCUUbiquitin OS=Encephalitozoon cuniculi (strain GB-M1) OX=284813 GN=ECU02
TRINITY_DN134348_c0_g1_i1	2	UBID	MARHV3-octaprenyl-4-hydroxybenzoate carboxy-lyase OS=Marinobacter hydrocarbonoclasticus (strain ATCC 700491 / DSM 11845 / VT8) OX=351348 GN=ubiD PE=3 SV=1
TRINITY_DN5984_c0_g1_i7	2	UBIA1	CHICKUbiA prenyltransferase domain-containing protein 1 OS=Gallus gallus OX=9031 GN=UBIAD1 PE=2 SV=1
TRINITY_DN8252_c0_g1_i15	2	UBI1P	CANAXPolyubiquitin OS=Candida albicans OX=5476 GN=UBI1 PE=1 SV=1
TRINITY_DN17089_c0_g1_i23	2	UBI1P	CANAXPolyubiquitin OS=Candida albicans OX=5476 GN=UBI1 PE=1 SV=1
TRINITY_DN1065_c3_g1_i6	2	UBE4A	HUMANUbiquitin conjugation factor E4 A OS=Homo sapiens OX=9606 GN=UBE4A PE=1 SV=2
TRINITY_DN1316_c0_g1_i13	2	UBE4A	BOVINUbiquitin conjugation factor E4 A OS=Bos taurus OX=9913 GN=UBE4A PE=2 SV=1
TRINITY_DN2669_c0_g1_i116	2	UBE3B	XENTRUbiquitin-protein ligase E3B OS=Xenopus tropicalis OX=8364 GN=ube3b PE=2 SV=1
TRINITY_DN2669_c0_g1_i211	2	UBE3B	XENTRUbiquitin-protein ligase E3B OS=Xenopus tropicalis OX=8364 GN=ube3b PE=2 SV=1
TRINITY_DN2669_c0_g1_i220	2	UBE3B	XENTRUbiquitin-protein ligase E3B OS=Xenopus tropicalis OX=8364 GN=ube3b PE=2 SV=1
TRINITY_DN4058_c1_g1_i112	2	UBE3A	MOUSEUbiquitin-protein ligase E3A OS=Mus musculus OX=10090 GN=Ube3a PE=1 SV=2
TRINITY_DN4058_c1_g1_i37	2	UBE3A	MOUSEUbiquitin-protein ligase E3A OS=Mus musculus OX=10090 GN=Ube3a PE=1 SV=2
TRINITY_DN14661_c2_g1_i30	2	UBE3A	MOUSEUbiquitin-protein ligase E3A OS=Mus musculus OX=10090 GN=Ube3a PE=1 SV=2
TRINITY_DN4058_c1_g1_i27	2	UBE3A	HUMANUbiquitin-protein ligase E3A OS=Homo sapiens OX=9606 GN=UBE3A PE=1 SV=4
TRINITY_DN4058_c1_g1_i73	2	UBE3A	HUMANUbiquitin-protein ligase E3A OS=Homo sapiens OX=9606 GN=UBE3A PE=1 SV=4
TRINITY_DN7838_c0_g1_i7	2	UBE2Z	DANREUbiquitin-conjugating enzyme E2 Z OS=Danio rerio OX=7955 GN=ube2z PE=2 SV=2
TRINITY_DN3836_c0_g1_i23	2	UBE2U	MACFAUbiquitin-conjugating enzyme E2 U OS=Macaca fascicularis OX=9541 GN=UBE2U PE=2 SV=1
TRINITY_DN2690_c0_g1_i15	2	UBE2H	BOVINUbiquitin-conjugating enzyme E2 H OS=Bos taurus OX=9913 GN=UBE2H PE=2 SV=1
TRINITY_DN2690_c0_g1_i42	2	UBE2H	BOVINUbiquitin-conjugating enzyme E2 H OS=Bos taurus OX=9913 GN=UBE2H PE=2 SV=1
TRINITY_DN8337_c0_g1_i13	2	UBE2A	HUMANUbiquitin-conjugating enzyme E2 A OS=Homo sapiens OX=9606 GN=UBE2A PE=1 SV=2
TRINITY_DN40929_c0_g1_i1	2	UBCD1	DROMEUbiquitin-conjugating enzyme E2-17 kDa OS=Drosophila melanogaster OX=7227 GN=eff PE=2 SV=1
TRINITY_DN155_c0_g1_i10	2	UBC9	CHICKSUMO-conjugating enzyme UBC9 OS=Gallus gallus OX=9031 GN=UBE2I PE=1 SV=1
TRINITY_DN155_c0_g1_i12	2	UBC9	CHICKSUMO-conjugating enzyme UBC9 OS=Gallus gallus OX=9031 GN=UBE2I PE=1 SV=1
TRINITY_DN114037_c0_g1_i1	2	UBC5A	ORYSJUbiquitin-conjugating enzyme E2 5A OS=Oryza sativa subsp. japonica OX=39947 GN=UBC5A PE=2 SV=1
TRINITY_DN3358_c0_g1_i2	2	UBC12	BOVINNEDD8-conjugating enzyme Ubc12 OS=Bos taurus OX=9913 GN=UBE2M PE=2 SV=1
TRINITY_DN35779_c1_g1_i1	2	UBC	HUMANPolyubiquitin-C OS=Homo sapiens OX=9606 GN=UBC PE=1 SV=3
TRINITY_DN3412_c0_g1_i20	2	UBC	GORGOPolyubiquitin-C OS=Gorilla gorilla gorilla OX=9595 GN=UBC PE=3 SV=1
TRINITY_DN3412_c0_g1_i14	2	UBC	GORGOPolyubiquitin-C OS=Gorilla gorilla gorilla OX=9595 GN=UBC PE=3 SV=1
TRINITY_DN8252_c0_g1_i4	2	UBB	GORGOPolyubiquitin-B OS=Gorilla gorilla gorilla OX=9595 GN=UBB PE=3 SV=1
TRINITY_DN32670_c0_g2_i1	2	UBB	BOVINPolyubiquitin-B OS=Bos taurus OX=9913 GN=UBB PE=1 SV=1
TRINITY_DN34917_c0_g1_i6	2	UBB	BOVINPolyubiquitin-B OS=Bos taurus OX=9913 GN=UBB PE=1 SV=1
TRINITY_DN16490_c0_g1_i2	2	UBB	BOVINPolyubiquitin-B OS=Bos taurus OX=9913 GN=UBB PE=1 SV=1
TRINITY_DN4109_c0_g1_i10	2	UBA6	MOUSEUbiquitin-like modifier-activating enzyme 6 OS=Mus musculus OX=10090 GN=Uba6 PE=1 SV=1
TRINITY_DN3016_c0_g1_i22	2	UBA3	RATNEDD8-activating enzyme E1 catalytic subunit OS=Rattus norvegicus OX=10116 GN=Uba3 PE=1 SV=1
TRINITY_DN9652_c0_g1_i2	2	UBA1Y	MOUSEUbiquitin-like modifier-activating enzyme 1 Y OS=Mus musculus OX=10090 GN=Uba1y PE=1 SV=2
TRINITY_DN467_c0_g1_i16	2	UBA1	RABITUbiquitin-like modifier-activating enzyme 1 OS=Oryctolagus cuniculus OX=9986 GN=UBA1 PE=1 SV=1
TRINITY_DN467_c0_g1_i3	2	UBA1	RABITUbiquitin-like modifier-activating enzyme 1 OS=Oryctolagus cuniculus OX=9986 GN=UBA1 PE=1 SV=1
TRINITY_DN467_c0_g1_i13	2	UBA1	RABITUbiquitin-like modifier-activating enzyme 1 OS=Oryctolagus cuniculus OX=9986 GN=UBA1 PE=1 SV=1
TRINITY_DN844_c0_g1_i4	2	UB2Q1	HUMANUbiquitin-conjugating enzyme E2 Q1 OS=Homo sapiens OX=9606 GN=UBE2Q1 PE=1 SV=1
TRINITY_DN982_c3_g1_i4	2	UB2L5	HUMANUbiquitin-conjugating enzyme E2 L5 OS=Homo sapiens OX=9606 GN=UBE2L5 PE=2 SV=1
TRINITY_DN3829_c0_g1_i1	2	UB2J1	HUMANUbiquitin-conjugating enzyme E2 J1 OS=Homo sapiens OX=9606 GN=UBE2J1 PE=1 SV=2
TRINITY_DN1232_c0_g1_i9	2	UB2G2	HUMANUbiquitin-conjugating enzyme E2 G2 OS=Homo sapiens OX=9606 GN=UBE2G2 PE=1 SV=1
TRINITY_DN14971_c0_g1_i3	2	UB22A	XENLAUbiquitin carboxyl-terminal hydrolase 22-A OS=Xenopus laevis OX=8355 GN=usp22-a PE=2 SV=1
TRINITY_DN9625_c0_g1_i16	2	U5S1	MOUSE116 kDa U5 small nuclear ribonucleoprotein component OS=Mus musculus OX=10090 GN=Eftud2 PE=1 SV=1
TRINITY_DN9625_c0_g1_i6	2	U5S1	MOUSE116 kDa U5 small nuclear ribonucleoprotein component OS=Mus musculus OX=10090 GN=Eftud2 PE=1 SV=1
TRINITY_DN23927_c0_g1_i4	2	U5S1	MOUSE116 kDa U5 small nuclear ribonucleoprotein component OS=Mus musculus OX=10090 GN=Eftud2 PE=1 SV=1
TRINITY_DN31493_c0_g3_i1	2	U5S1	MOUSE116 kDa U5 small nuclear ribonucleoprotein component OS=Mus musculus OX=10090 GN=Eftud2 PE=1 SV=1
TRINITY_DN330_c0_g1_i9	2	U5S1	CHICK116 kDa U5 small nuclear ribonucleoprotein component OS=Gallus gallus OX=9031 GN=EFTUD2 PE=2 SV=1
TRINITY_DN7783_c0_g1_i4	2	U19BA	XENLAProtein unc-119 homolog B-A OS=Xenopus laevis OX=8355 GN=unc119b-a PE=2 SV=1
TRINITY_DN11566_c0_g1_i1	2	U183	DROMEUPF0183 protein CG7083 OS=Drosophila melanogaster OX=7227 GN=CG7083 PE=2 SV=1
[truncated: 8,941 more rows]

## Sheet: C3
Contig	Cluster
[truncated: 5,843 more rows]

## Sheet: C4
Contig	Cluster
[truncated: 7,509 more rows]

## Sheet: C5
Contig	Cluster
[truncated: 16,774 more rows]

## Sheet: C5_unique_enrichment
source	term_name	term_id	highlighted	adjusted_p_value	negative_log10_of_adjusted_p_value	term_size	query_size	intersection_size	effective_domain_size	intersections
[truncated: 2,798 more rows]

[truncated: 2 more sheets: C6, C7]
