# Supplementary material for: Phagocytosis of microbial symbionts supports embryonic nutrition in the sponge Halichondria panicea
Source: Research Square preprint supplement (doi:10.21203/rs.3.rs-7749905/v1), 2025-12-02
Supplement: Supplementary file 10 [file ead6110aad3a0f547917a6ba.xlsx]

## Sheet: March_enrichment_in_females
Enrichment FDR	nGenes	Pathway Genes	Fold Enrichment	Pathway	URL	Genes
0.07206622	2	25	1431261538	GO:0150105 Protein localization to cell-cell junction	https://amigo.geneontology.org/amigo/term/GO:0150105	JAK1 SCRIB
0.090803527	1	17	105239819	GO:0001767 Establishment of lymphocyte polarity	https://amigo.geneontology.org/amigo/term/GO:0001767	SCRIB
0.090803527	1	16	1118173077	GO:0001768 Establishment of t cell polarity	https://amigo.geneontology.org/amigo/term/GO:0001768	SCRIB
0.090803527	1	17	105239819	GO:0001921 Positive regulation of receptor recycling	https://amigo.geneontology.org/amigo/term/GO:0001921	SCRIB
0.090803527	2	152	2354048583	GO:0007259 Cell surface receptor signaling pathway via jak-stat	https://amigo.geneontology.org/amigo/term/GO:0007259	JAK1 FGFR3
0.090803527	3	779	6889898292	GO:0008285 Negative regulation of cell population proliferation	https://amigo.geneontology.org/amigo/term/GO:0008285	RNF41 PDX1 SCRIB
0.090803527	1	17	105239819	GO:0009757 Hexose mediated signaling	https://amigo.geneontology.org/amigo/term/GO:0009757	PDX1
0.090803527	4	1197	5978536084	GO:0009790 Embryo development	https://amigo.geneontology.org/amigo/term/GO:0009790	PDX1 TAPT1 SCRIB MYO3B
0.090803527	4	1086	6589601927	GO:0009887 Animal organ morphogenesis	https://amigo.geneontology.org/amigo/term/GO:0009887	SCRIB FGFR3 MYO3B PDX1
0.090803527	5	2165	4131817374	GO:0009888 Tissue development	https://amigo.geneontology.org/amigo/term/GO:0009888	PDX1 NOM1 TAPT1 SCRIB FGFR3
0.090803527	1	6	2981794872	GO:0010040 Response to iron(ii) ion	https://amigo.geneontology.org/amigo/term/GO:0010040	PDX1
0.090803527	1	3	5963589744	GO:0010157 Response to chlorate	https://amigo.geneontology.org/amigo/term/GO:0010157	PDX1
0.090803527	1	17	105239819	GO:0010182 Sugar mediated signaling pathway	https://amigo.geneontology.org/amigo/term/GO:0010182	PDX1
0.090803527	1	17	105239819	GO:0010255 Glucose mediated signaling pathway	https://amigo.geneontology.org/amigo/term/GO:0010255	PDX1
0.090803527	1	13	1376213018	GO:0010518 Positive regulation of phospholipase activity	https://amigo.geneontology.org/amigo/term/GO:0010518	FGFR3
0.090803527	6	3659	293371455	GO:0010604 Positive regulation of macromolecule metabolic process	https://amigo.geneontology.org/amigo/term/GO:0010604	UBE2S PDX1 SCRIB FGFR3 STX5 RNF41
0.090803527	1	14	1277912088	GO:0010992 Ubiquitin recycling	https://amigo.geneontology.org/amigo/term/GO:0010992	UBE2S
0.090803527	1	10	1789076923	GO:0010994 Free ubiquitin chain polymerization	https://amigo.geneontology.org/amigo/term/GO:0010994	UBE2S
0.090803527	1	4	4472692308	GO:0016080 Synaptic vesicle targeting	https://amigo.geneontology.org/amigo/term/GO:0016080	SCRIB
0.090803527	2	153	2338662645	GO:0016331 Morphogenesis of embryonic epithelium	https://amigo.geneontology.org/amigo/term/GO:0016331	PDX1 SCRIB
0.090803527	1	11	1626433566	GO:0021548 Pons development	https://amigo.geneontology.org/amigo/term/GO:0021548	SCRIB
0.090803527	1	3	5963589744	GO:0021747 Cochlear nucleus development	https://amigo.geneontology.org/amigo/term/GO:0021747	SCRIB
0.090803527	1	7	2555824176	GO:0031017 Exocrine pancreas development	https://amigo.geneontology.org/amigo/term/GO:0031017	PDX1
0.090803527	1	16	1118173077	GO:0034342 Response to type iii interferon	https://amigo.geneontology.org/amigo/term/GO:0034342	JAK1
0.090803527	1	14	1277912088	GO:0034498 Early endosome to golgi transport	https://amigo.geneontology.org/amigo/term/GO:0034498	STX5
0.090803527	1	12	1490897436	GO:0035519 Protein k29-linked ubiquitination	https://amigo.geneontology.org/amigo/term/GO:0035519	UBE2S
0.090803527	1	11	1626433566	GO:0035723 Interleukin-15-mediated signaling pathway	https://amigo.geneontology.org/amigo/term/GO:0035723	JAK1
0.090803527	1	10	1789076923	GO:0035771 Interleukin-4-mediated signaling pathway	https://amigo.geneontology.org/amigo/term/GO:0035771	JAK1
0.090803527	1	9	1987863248	GO:0038110 Interleukin-2-mediated signaling pathway	https://amigo.geneontology.org/amigo/term/GO:0038110	JAK1
0.090803527	1	8	2236346154	GO:0038111 Interleukin-7-mediated signaling pathway	https://amigo.geneontology.org/amigo/term/GO:0038111	JAK1
0.090803527	1	9	1987863248	GO:0038113 Interleukin-9-mediated signaling pathway	https://amigo.geneontology.org/amigo/term/GO:0038113	JAK1
0.090803527	1	6	2981794872	GO:0038154 Interleukin-11-mediated signaling pathway	https://amigo.geneontology.org/amigo/term/GO:0038154	JAK1
0.090803527	1	15	1192717949	GO:0038196 Type iii interferon-mediated signaling pathway	https://amigo.geneontology.org/amigo/term/GO:0038196	JAK1
0.090803527	2	138	2592865106	GO:0042471 Ear morphogenesis	https://amigo.geneontology.org/amigo/term/GO:0042471	SCRIB MYO3B
0.090803527	2	117	3058251151	GO:0042472 Inner ear morphogenesis	https://amigo.geneontology.org/amigo/term/GO:0042472	SCRIB MYO3B
0.090803527	3	713	7527672888	GO:0043085 Positive regulation of catalytic activity	https://amigo.geneontology.org/amigo/term/GO:0043085	UBE2S FGFR3 SCRIB
0.090803527	1	17	105239819	GO:0043201 Response to l-leucine	https://amigo.geneontology.org/amigo/term/GO:0043201	PDX1
0.090803527	2	242	1478575969	GO:0043583 Ear development	https://amigo.geneontology.org/amigo/term/GO:0043583	SCRIB MYO3B
0.090803527	1	11	1626433566	GO:0043615 Astrocyte cell migration	https://amigo.geneontology.org/amigo/term/GO:0043615	SCRIB
0.090803527	1	12	1490897436	GO:0044314 Protein k27-linked ubiquitination	https://amigo.geneontology.org/amigo/term/GO:0044314	UBE2S
0.090803527	2	238	1503425986	GO:0045732 Positive regulation of protein catabolic process	https://amigo.geneontology.org/amigo/term/GO:0045732	STX5 RNF41
0.090803527	1	17	105239819	GO:0046007 Negative regulation of activated t cell proliferation	https://amigo.geneontology.org/amigo/term/GO:0046007	SCRIB
0.090803527	1	9	1987863248	GO:0048280 Vesicle fusion with golgi apparatus	https://amigo.geneontology.org/amigo/term/GO:0048280	STX5
0.090803527	1	16	1118173077	GO:0048308 Organelle inheritance	https://amigo.geneontology.org/amigo/term/GO:0048308	STX5
0.090803527	1	16	1118173077	GO:0048313 Golgi inheritance	https://amigo.geneontology.org/amigo/term/GO:0048313	STX5
0.090803527	6	3229	3324391929	GO:0048513 Animal organ development	https://amigo.geneontology.org/amigo/term/GO:0048513	PDX1 NOM1 TAPT1 SCRIB FGFR3 MYO3B
0.090803527	3	648	8282763533	GO:0048598 Embryonic morphogenesis	https://amigo.geneontology.org/amigo/term/GO:0048598	PDX1 SCRIB MYO3B
0.090803527	1	15	1192717949	GO:0048820 Hair follicle maturation	https://amigo.geneontology.org/amigo/term/GO:0048820	NOM1
0.090803527	2	214	1672034508	GO:0048839 Inner ear development	https://amigo.geneontology.org/amigo/term/GO:0048839	SCRIB MYO3B
0.090803527	2	256	1397716346	GO:0048863 Stem cell differentiation	https://amigo.geneontology.org/amigo/term/GO:0048863	PDX1 TAPT1
0.090803527	2	222	1611781012	GO:0051216 Cartilage development	https://amigo.geneontology.org/amigo/term/GO:0051216	TAPT1 FGFR3
0.090803527	4	1205	5938844558	GO:0051247 Positive regulation of protein metabolic process	https://amigo.geneontology.org/amigo/term/GO:0051247	UBE2S FGFR3 STX5 RNF41
0.090803527	1	7	2555824176	GO:0060290 Transdifferentiation	https://amigo.geneontology.org/amigo/term/GO:0060290	PDX1
0.090803527	2	228	1569365722	GO:0060348 Bone development	https://amigo.geneontology.org/amigo/term/GO:0060348	FGFR3 TAPT1
0.090803527	1	11	1626433566	GO:0060397 Growth hormone receptor signaling pathway via jak-stat	https://amigo.geneontology.org/amigo/term/GO:0060397	JAK1
0.090803527	2	214	1672034508	GO:0060491 Regulation of cell projection assembly	https://amigo.geneontology.org/amigo/term/GO:0060491	MYO3B TAPT1
0.090803527	1	15	1192717949	GO:0061469 Regulation of type b pancreatic cell proliferation	https://amigo.geneontology.org/amigo/term/GO:0061469	PDX1
0.090803527	1	11	1626433566	GO:0070669 Response to interleukin-2	https://amigo.geneontology.org/amigo/term/GO:0070669	JAK1
0.090803527	1	12	1490897436	GO:0070672 Response to interleukin-15	https://amigo.geneontology.org/amigo/term/GO:0070672	JAK1
0.090803527	1	10	1789076923	GO:0071104 Response to interleukin-9	https://amigo.geneontology.org/amigo/term/GO:0071104	JAK1
0.090803527	1	11	1626433566	GO:0071350 Cellular response to interleukin-15	https://amigo.geneontology.org/amigo/term/GO:0071350	JAK1
0.090803527	1	9	1987863248	GO:0071352 Cellular response to interleukin-2	https://amigo.geneontology.org/amigo/term/GO:0071352	JAK1
0.090803527	1	9	1987863248	GO:0071355 Cellular response to interleukin-9	https://amigo.geneontology.org/amigo/term/GO:0071355	JAK1
0.090803527	1	15	1192717949	GO:0071358 Cellular response to type iii interferon	https://amigo.geneontology.org/amigo/term/GO:0071358	JAK1
0.090803527	1	8	2236346154	GO:0071896 Protein localization to adherens junction	https://amigo.geneontology.org/amigo/term/GO:0071896	SCRIB
0.090803527	1	17	105239819	GO:0085020 Protein k6-linked ubiquitination	https://amigo.geneontology.org/amigo/term/GO:0085020	UBE2S
0.090803527	1	6	2981794872	GO:0090166 Golgi disassembly	https://amigo.geneontology.org/amigo/term/GO:0090166	STX5
0.090803527	1	10	1789076923	GO:0097050 Type b pancreatic cell apoptotic process	https://amigo.geneontology.org/amigo/term/GO:0097050	PDX1
0.090803527	3	675	7951452991	GO:0097190 Apoptotic signaling pathway	https://amigo.geneontology.org/amigo/term/GO:0097190	RNF41 PDX1 FGFR3
0.090803527	2	260	1376213018	GO:0097191 Extrinsic apoptotic signaling pathway	https://amigo.geneontology.org/amigo/term/GO:0097191	RNF41 FGFR3
0.090803527	2	163	2195186409	GO:0097696 Cell surface receptor signaling pathway via stat	https://amigo.geneontology.org/amigo/term/GO:0097696	JAK1 FGFR3
0.090803527	1	12	1490897436	GO:0098887 Neurotransmitter receptor transport endosome to postsynaptic membrane	https://amigo.geneontology.org/amigo/term/GO:0098887	SCRIB
0.090803527	1	4	4472692308	GO:0098968 Neurotransmitter receptor transport postsynaptic membrane to endosome	https://amigo.geneontology.org/amigo/term/GO:0098968	SCRIB
0.090803527	1	17	105239819	GO:0098969 Neurotransmitter receptor transport to postsynaptic membrane	https://amigo.geneontology.org/amigo/term/GO:0098969	SCRIB
0.090803527	1	12	1490897436	GO:0099639 Neurotransmitter receptor transport endosome to plasma membrane	https://amigo.geneontology.org/amigo/term/GO:0099639	SCRIB
0.090803527	2	212	1687808418	GO:0120032 Regulation of plasma membrane bounded cell projection assembly	https://amigo.geneontology.org/amigo/term/GO:0120032	MYO3B TAPT1
0.090803527	2	121	2957151939	GO:0120034 Positive regulation of plasma membrane bounded cell projection assembly	https://amigo.geneontology.org/amigo/term/GO:0120034	MYO3B TAPT1
0.090803527	1	8	2236346154	GO:1901525 Negative regulation of mitophagy	https://amigo.geneontology.org/amigo/term/GO:1901525	RNF41
0.090803527	2	129	2773762671	GO:1902414 Protein localization to cell junction	https://amigo.geneontology.org/amigo/term/GO:1902414	SCRIB JAK1
0.090803527	1	16	1118173077	GO:1902946 Protein localization to early endosome	https://amigo.geneontology.org/amigo/term/GO:1902946	SCRIB
0.090803527	1	10	1789076923	GO:1903010 Regulation of bone development	https://amigo.geneontology.org/amigo/term/GO:1903010	TAPT1
0.090803527	1	3	5963589744	GO:1903012 Positive regulation of bone development	https://amigo.geneontology.org/amigo/term/GO:1903012	TAPT1
0.090803527	1	8	2236346154	GO:1903147 Negative regulation of autophagy of mitochondrion	https://amigo.geneontology.org/amigo/term/GO:1903147	RNF41
0.090803527	1	16	1118173077	GO:1903358 Regulation of golgi organization	https://amigo.geneontology.org/amigo/term/GO:1903358	STX5
0.090803527	1	11	1626433566	GO:1904668 Positive regulation of ubiquitin protein ligase activity	https://amigo.geneontology.org/amigo/term/GO:1904668	UBE2S
0.090803527	1	5	3578153846	GO:1904692 Positive regulation of type b pancreatic cell proliferation	https://amigo.geneontology.org/amigo/term/GO:1904692	PDX1
0.090803527	1	9	1987863248	GO:2000674 Regulation of type b pancreatic cell apoptotic process	https://amigo.geneontology.org/amigo/term/GO:2000674	PDX1
0.090803527	1	6	2981794872	GO:2000675 Negative regulation of type b pancreatic cell apoptotic process	https://amigo.geneontology.org/amigo/term/GO:2000675	PDX1
0.093381072	1	18	9939316239	GO:0098877 Neurotransmitter receptor transport to plasma membrane	https://amigo.geneontology.org/amigo/term/GO:0098877	SCRIB
0.093381072	1	18	9939316239	GO:1903540 Establishment of protein localization to postsynaptic membrane	https://amigo.geneontology.org/amigo/term/GO:1903540	SCRIB
0.094275701	1	19	9416194332	GO:0009756 Carbohydrate mediated signaling	https://amigo.geneontology.org/amigo/term/GO:0009756	PDX1
0.094275701	1	19	9416194332	GO:0010517 Regulation of phospholipase activity	https://amigo.geneontology.org/amigo/term/GO:0010517	FGFR3
0.094275701	1	20	8945384615	GO:0036342 Post-anal tail morphogenesis	https://amigo.geneontology.org/amigo/term/GO:0036342	SCRIB
0.094275701	2	286	1251102743	GO:0051896 Regulation of phosphatidylinositol 3-kinase/protein kinase b signal transduction	https://amigo.geneontology.org/amigo/term/GO:0051896	RNF41 FGFR3
0.094275701	1	20	8945384615	GO:0060088 Auditory receptor cell stereocilium organization	https://amigo.geneontology.org/amigo/term/GO:0060088	SCRIB
0.094275701	1	20	8945384615	GO:0070102 Interleukin-6-mediated signaling pathway	https://amigo.geneontology.org/amigo/term/GO:0070102	JAK1
0.094275701	2	289	1238115518	GO:0071695 Anatomical structure maturation	https://amigo.geneontology.org/amigo/term/GO:0071695	NOM1 FGFR3
0.094275701	1	20	8945384615	GO:0098761 Cellular response to interleukin-7	https://amigo.geneontology.org/amigo/term/GO:0098761	JAK1
0.094275701	1	19	9416194332	GO:0099638 Endosome to plasma membrane protein transport	https://amigo.geneontology.org/amigo/term/GO:0099638	SCRIB
0.095687252	3	874	6140996303	GO:0019725 Cellular homeostasis	https://amigo.geneontology.org/amigo/term/GO:0019725	DMXL1 UBE2S PDX1
0.095921652	2	300	1192717949	GO:0090596 Sensory organ morphogenesis	https://amigo.geneontology.org/amigo/term/GO:0090596	SCRIB MYO3B
0.095921652	1	21	8519413919	GO:0098760 Response to interleukin-7	https://amigo.geneontology.org/amigo/term/GO:0098760	JAK1
0.095921652	1	21	8519413919	GO:1904666 Regulation of ubiquitin protein ligase activity	https://amigo.geneontology.org/amigo/term/GO:1904666	UBE2S
0.096211782	2	302	1184819154	GO:0061448 Connective tissue development	https://amigo.geneontology.org/amigo/term/GO:0061448	TAPT1 FGFR3
0.097142031	2	317	1128755157	GO:0000209 Protein polyubiquitination	https://amigo.geneontology.org/amigo/term/GO:0000209	UBE2S RNF41
0.097142031	1	28	638956044	GO:0001919 Regulation of receptor recycling	https://amigo.geneontology.org/amigo/term/GO:0001919	SCRIB
0.097142031	1	32	5590865385	GO:0001958 Endochondral ossification	https://amigo.geneontology.org/amigo/term/GO:0001958	FGFR3
0.097142031	1	23	7778595318	GO:0002093 Auditory receptor cell morphogenesis	https://amigo.geneontology.org/amigo/term/GO:0002093	SCRIB
0.097142031	1	32	5590865385	GO:0002295 T-helper cell lineage commitment	https://amigo.geneontology.org/amigo/term/GO:0002295	JAK1
0.097142031	1	30	5963589744	GO:0003309 Type b pancreatic cell differentiation	https://amigo.geneontology.org/amigo/term/GO:0003309	PDX1
0.097142031	1	28	638956044	GO:0003416 Endochondral bone growth	https://amigo.geneontology.org/amigo/term/GO:0003416	FGFR3
0.097142031	1	32	5590865385	GO:0006541 Glutamine metabolic process	https://amigo.geneontology.org/amigo/term/GO:0006541	GGH
0.097142031	1	27	6626210826	GO:0006760 Folic acid-containing compound metabolic process	https://amigo.geneontology.org/amigo/term/GO:0006760	GGH
0.097142031	5	2868	3119032293	GO:0009653 Anatomical structure morphogenesis	https://amigo.geneontology.org/amigo/term/GO:0009653	PDX1 SCRIB JAK1 FGFR3 MYO3B
0.097142031	6	3988	2691690456	GO:0009893 Positive regulation of metabolic process	https://amigo.geneontology.org/amigo/term/GO:0009893	UBE2S PDX1 SCRIB FGFR3 STX5 RNF41
0.097142031	1	30	5963589744	GO:0010039 Response to iron ion	https://amigo.geneontology.org/amigo/term/GO:0010039	PDX1
0.097142031	1	32	5590865385	GO:0010458 Exit from mitosis	https://amigo.geneontology.org/amigo/term/GO:0010458	UBE2S
0.097142031	2	313	1143180143	GO:0016197 Endosomal transport	https://amigo.geneontology.org/amigo/term/GO:0016197	SCRIB STX5
0.097142031	2	372	9618693135	GO:0021700 Developmental maturation	https://amigo.geneontology.org/amigo/term/GO:0021700	NOM1 FGFR3
0.097142031	1	26	6881065089	GO:0030859 Polarized epithelial cell differentiation	https://amigo.geneontology.org/amigo/term/GO:0030859	SCRIB
0.097142031	1	25	7156307692	GO:0031145 Anaphase-promoting complex-dependent catabolic process	https://amigo.geneontology.org/amigo/term/GO:0031145	UBE2S
0.097142031	2	376	9516366612	GO:0031346 Positive regulation of cell projection organization	https://amigo.geneontology.org/amigo/term/GO:0031346	MYO3B TAPT1
0.097142031	1	27	6626210826	GO:0034112 Positive regulation of homotypic cell-cell adhesion	https://amigo.geneontology.org/amigo/term/GO:0034112	JAK1
0.097142031	1	23	7778595318	GO:0035089 Establishment of apical/basal cell polarity	https://amigo.geneontology.org/amigo/term/GO:0035089	SCRIB
0.097142031	1	33	5421445221	GO:0035774 Positive regulation of insulin secretion involved in cellular response to glucose stimulus	https://amigo.geneontology.org/amigo/term/GO:0035774	PDX1
0.097142031	1	29	6169230769	GO:0035988 Chondrocyte proliferation	https://amigo.geneontology.org/amigo/term/GO:0035988	FGFR3
0.097142031	1	33	5421445221	GO:0036010 Protein localization to endosome	https://amigo.geneontology.org/amigo/term/GO:0036010	SCRIB
0.097142031	1	32	5590865385	GO:0036075 Replacement ossification	https://amigo.geneontology.org/amigo/term/GO:0036075	FGFR3
0.097142031	4	1851	3866184599	GO:0042127 Regulation of cell population proliferation	https://amigo.geneontology.org/amigo/term/GO:0042127	RNF41 FGFR3 PDX1 SCRIB
0.097142031	1	33	5421445221	GO:0042558 Pteridine-containing compound metabolic process	https://amigo.geneontology.org/amigo/term/GO:0042558	GGH
0.097142031	4	1853	3862011707	GO:0042592 Homeostatic process	https://amigo.geneontology.org/amigo/term/GO:0042592	DMXL1 UBE2S PDX1 SCRIB
0.097142031	2	322	1111227903	GO:0043491 Phosphatidylinositol 3-kinase/protein kinase b signal transduction	https://amigo.geneontology.org/amigo/term/GO:0043491	RNF41 FGFR3
0.097142031	1	29	6169230769	GO:0044342 Type b pancreatic cell proliferation	https://amigo.geneontology.org/amigo/term/GO:0044342	PDX1
0.097142031	1	32	5590865385	GO:0045724 Positive regulation of cilium assembly	https://amigo.geneontology.org/amigo/term/GO:0045724	TAPT1
0.097142031	3	987	5437923778	GO:0046649 Lymphocyte activation	https://amigo.geneontology.org/amigo/term/GO:0046649	SCRIB RNF41 JAK1
0.097142031	2	317	1128755157	GO:0048562 Embryonic organ morphogenesis	https://amigo.geneontology.org/amigo/term/GO:0048562	SCRIB MYO3B
0.097142031	2	350	102232967	GO:0051345 Positive regulation of hydrolase activity	https://amigo.geneontology.org/amigo/term/GO:0051345	FGFR3 SCRIB
0.097142031	1	24	7454487179	GO:0051443 Positive regulation of ubiquitin-protein transferase activity	https://amigo.geneontology.org/amigo/term/GO:0051443	UBE2S
0.097142031	1	31	5771215881	GO:0051491 Positive regulation of filopodium assembly	https://amigo.geneontology.org/amigo/term/GO:0051491	MYO3B
0.097142031	1	31	5771215881	GO:0060117 Auditory receptor cell development	https://amigo.geneontology.org/amigo/term/GO:0060117	SCRIB
0.097142031	1	23	7778595318	GO:0060193 Positive regulation of lipase activity	https://amigo.geneontology.org/amigo/term/GO:0060193	FGFR3
0.097142031	1	29	6169230769	GO:0060333 Type ii interferon-mediated signaling pathway	https://amigo.geneontology.org/amigo/term/GO:0060333	JAK1
0.097142031	1	26	6881065089	GO:0060396 Growth hormone receptor signaling pathway	https://amigo.geneontology.org/amigo/term/GO:0060396	JAK1
0.097142031	1	27	6626210826	GO:0060561 Apoptotic process involved in morphogenesis	https://amigo.geneontology.org/amigo/term/GO:0060561	SCRIB
0.097142031	1	32	5590865385	GO:0061036 Positive regulation of cartilage development	https://amigo.geneontology.org/amigo/term/GO:0061036	TAPT1
0.097142031	1	25	7156307692	GO:0061162 Establishment of monopolar cell polarity	https://amigo.geneontology.org/amigo/term/GO:0061162	SCRIB
0.097142031	1	26	6881065089	GO:0061339 Establishment or maintenance of monopolar cell polarity	https://amigo.geneontology.org/amigo/term/GO:0061339	SCRIB
0.097142031	1	33	5421445221	GO:0070977 Bone maturation	https://amigo.geneontology.org/amigo/term/GO:0070977	FGFR3
0.097142031	1	27	6626210826	GO:0071378 Cellular response to growth hormone stimulus	https://amigo.geneontology.org/amigo/term/GO:0071378	JAK1
0.097142031	1	28	638956044	GO:0072540 T-helper 17 cell lineage commitment	https://amigo.geneontology.org/amigo/term/GO:0072540	JAK1
0.097142031	1	25	7156307692	GO:0090103 Cochlea morphogenesis	https://amigo.geneontology.org/amigo/term/GO:0090103	MYO3B
0.097142031	1	31	5771215881	GO:0098868 Bone growth	https://amigo.geneontology.org/amigo/term/GO:0098868	FGFR3
0.097142031	1	26	6881065089	GO:0099149 Regulation of postsynaptic neurotransmitter receptor internalization	https://amigo.geneontology.org/amigo/term/GO:0099149	SCRIB
0.097142031	1	30	5963589744	GO:0099637 Neurotransmitter receptor transport	https://amigo.geneontology.org/amigo/term/GO:0099637	SCRIB
0.097142031	1	26	6881065089	GO:0140105 Interleukin-10-mediated signaling pathway	https://amigo.geneontology.org/amigo/term/GO:0140105	JAK1
0.097142031	1	25	7156307692	GO:1902236 Negative regulation of endoplasmic reticulum stress-induced intrinsic apoptotic signaling pathway	https://amigo.geneontology.org/amigo/term/GO:1902236	PDX1
0.097142031	1	25	7156307692	GO:1903672 Positive regulation of sprouting angiogenesis	https://amigo.geneontology.org/amigo/term/GO:1903672	JAK1
0.097142031	1	30	5963589744	GO:1904036 Negative regulation of epithelial cell apoptotic process	https://amigo.geneontology.org/amigo/term/GO:1904036	PDX1
0.097589339	1	34	526199095	GO:0060191 Regulation of lipase activity	https://amigo.geneontology.org/amigo/term/GO:0060191	FGFR3
0.097589339	1	34	526199095	GO:0071353 Cellular response to interleukin-4	https://amigo.geneontology.org/amigo/term/GO:0071353	JAK1
0.097589339	1	34	526199095	GO:0098884 Postsynaptic neurotransmitter receptor internalization	https://amigo.geneontology.org/amigo/term/GO:0098884	SCRIB
0.097589339	1	34	526199095	GO:0140239 Postsynaptic endocytosis	https://amigo.geneontology.org/amigo/term/GO:0140239	SCRIB
0.099208944	1	35	5111648352	GO:0043373 Cd4-positive alpha-beta t cell lineage commitment	https://amigo.geneontology.org/amigo/term/GO:0043373	JAK1
0.099208944	1	35	5111648352	GO:0060603 Mammary gland duct morphogenesis	https://amigo.geneontology.org/amigo/term/GO:0060603	SCRIB
0.099370754	1	37	4835343035	GO:0002363 Alpha-beta t cell lineage commitment	https://amigo.geneontology.org/amigo/term/GO:0002363	JAK1
0.099370754	1	36	496965812	GO:0007035 Vacuolar acidification	https://amigo.geneontology.org/amigo/term/GO:0007035	DMXL1
0.099370754	1	36	496965812	GO:0010669 Epithelial structure maintenance	https://amigo.geneontology.org/amigo/term/GO:0010669	SCRIB
0.099370754	1	37	4835343035	GO:0016242 Negative regulation of macroautophagy	https://amigo.geneontology.org/amigo/term/GO:0016242	RNF41
0.099370754	1	37	4835343035	GO:0035883 Enteroendocrine cell differentiation	https://amigo.geneontology.org/amigo/term/GO:0035883	PDX1
0.099370754	3	1072	5006745121	GO:0044093 Positive regulation of molecular function	https://amigo.geneontology.org/amigo/term/GO:0044093	UBE2S FGFR3 SCRIB
0.099370754	1	37	4835343035	GO:0048799 Animal organ maturation	https://amigo.geneontology.org/amigo/term/GO:0048799	FGFR3
0.099370754	1	37	4835343035	GO:0070670 Response to interleukin-4	https://amigo.geneontology.org/amigo/term/GO:0070670	JAK1
0.099370754	1	37	4835343035	GO:1901524 Regulation of mitophagy	https://amigo.geneontology.org/amigo/term/GO:1901524	RNF41
0.102075998	2	414	8642883686	GO:0008544 Epidermis development	https://amigo.geneontology.org/amigo/term/GO:0008544	NOM1 SCRIB
0.102075998	1	39	4587376726	GO:0043369 Cd4-positive or cd8-positive alpha-beta t cell lineage commitment	https://amigo.geneontology.org/amigo/term/GO:0043369	JAK1
0.102075998	1	39	4587376726	GO:0046677 Response to antibiotic	https://amigo.geneontology.org/amigo/term/GO:0046677	JAK1
0.102075998	1	39	4587376726	GO:0060416 Response to growth hormone	https://amigo.geneontology.org/amigo/term/GO:0060416	JAK1
0.102075998	1	39	4587376726	GO:1902235 Regulation of endoplasmic reticulum stress-induced intrinsic apoptotic signaling pathway	https://amigo.geneontology.org/amigo/term/GO:1902235	PDX1
0.102557226	5	3125	2862523077	GO:0036211 Protein modification process	https://amigo.geneontology.org/amigo/term/GO:0036211	UBE2S RNF41 FGFR3 MYO3B JAK1
0.102557226	2	420	8519413919	GO:0042176 Regulation of protein catabolic process	https://amigo.geneontology.org/amigo/term/GO:0042176	STX5 RNF41
0.102557226	1	40	4472692308	GO:0060122 Inner ear receptor cell stereocilium organization	https://amigo.geneontology.org/amigo/term/GO:0060122	SCRIB
0.102557226	1	40	4472692308	GO:0099590 Neurotransmitter receptor internalization	https://amigo.geneontology.org/amigo/term/GO:0099590	SCRIB
0.103989256	1	41	4363602251	GO:0051438 Regulation of ubiquitin-protein transferase activity	https://amigo.geneontology.org/amigo/term/GO:0051438	UBE2S
0.105346829	1	42	425970696	GO:0090630 Activation of gtpase activity	https://amigo.geneontology.org/amigo/term/GO:0090630	SCRIB
0.105346829	1	42	425970696	GO:1902742 Apoptotic process involved in development	https://amigo.geneontology.org/amigo/term/GO:1902742	SCRIB
0.107264388	3	1153	4655013677	GO:0030163 Protein catabolic process	https://amigo.geneontology.org/amigo/term/GO:0030163	UBE2S RNF41 STX5
0.107264388	3	1155	4646953047	GO:0035295 Tube development	https://amigo.geneontology.org/amigo/term/GO:0035295	PDX1 SCRIB JAK1
0.107264388	3	1154	4650979869	GO:0050790 Regulation of catalytic activity	https://amigo.geneontology.org/amigo/term/GO:0050790	UBE2S FGFR3 SCRIB
0.107972013	1	44	4066083916	GO:1903146 Regulation of autophagy of mitochondrion	https://amigo.geneontology.org/amigo/term/GO:1903146	RNF41
0.108109473	1	45	3975726496	GO:0002360 T cell lineage commitment	https://amigo.geneontology.org/amigo/term/GO:0002360	JAK1
0.108109473	1	45	3975726496	GO:0071354 Cellular response to interleukin-6	https://amigo.geneontology.org/amigo/term/GO:0071354	JAK1
0.108109473	1	45	3975726496	GO:0072539 T-helper 17 cell differentiation	https://amigo.geneontology.org/amigo/term/GO:0072539	JAK1
0.108109473	1	45	3975726496	GO:1903670 Regulation of sprouting angiogenesis	https://amigo.geneontology.org/amigo/term/GO:1903670	JAK1
0.108792394	4	2120	3375616836	GO:0006915 Apoptotic process	https://amigo.geneontology.org/amigo/term/GO:0006915	RNF41 FGFR3 PDX1 SCRIB
0.108792394	1	46	3889297659	GO:0034110 Regulation of homotypic cell-cell adhesion	https://amigo.geneontology.org/amigo/term/GO:0034110	JAK1
0.108792394	1	46	3889297659	GO:0070979 Protein k11-linked ubiquitination	https://amigo.geneontology.org/amigo/term/GO:0070979	UBE2S
0.108999294	2	454	7881396137	GO:0001503 Ossification	https://amigo.geneontology.org/amigo/term/GO:0001503	TAPT1 FGFR3
0.108999294	3	1185	4529308666	GO:0045321 Leukocyte activation	https://amigo.geneontology.org/amigo/term/GO:0045321	SCRIB RNF41 JAK1
0.109656335	4	2141	3342507096	GO:0051246 Regulation of protein metabolic process	https://amigo.geneontology.org/amigo/term/GO:0051246	UBE2S FGFR3 STX5 RNF41
0.111194803	1	48	372724359	GO:0031018 Endocrine pancreas development	https://amigo.geneontology.org/amigo/term/GO:0031018	PDX1
0.112228229	4	2201	3251389229	GO:0008219 Cell death	https://amigo.geneontology.org/amigo/term/GO:0008219	RNF41 FGFR3 PDX1 SCRIB
0.112228229	4	2185	3275198029	GO:0008283 Cell population proliferation	https://amigo.geneontology.org/amigo/term/GO:0008283	SCRIB RNF41 FGFR3 PDX1
0.112228229	4	2197	3257308918	GO:0012501 Programmed cell death	https://amigo.geneontology.org/amigo/term/GO:0012501	RNF41 FGFR3 PDX1 SCRIB
0.112228229	2	478	7485677502	GO:0030098 Lymphocyte differentiation	https://amigo.geneontology.org/amigo/term/GO:0030098	RNF41 JAK1
0.112228229	1	50	3578153846	GO:0035272 Exocrine system development	https://amigo.geneontology.org/amigo/term/GO:0035272	PDX1
0.112228229	1	51	3507993967	GO:0042491 Inner ear auditory receptor cell differentiation	https://amigo.geneontology.org/amigo/term/GO:0042491	SCRIB
0.112228229	5	3331	2685495231	GO:0043412 Macromolecule modification	https://amigo.geneontology.org/amigo/term/GO:0043412	UBE2S RNF41 FGFR3 MYO3B JAK1
0.112228229	1	51	3507993967	GO:0046006 Regulation of activated t cell proliferation	https://amigo.geneontology.org/amigo/term/GO:0046006	SCRIB
0.112228229	2	475	7532955466	GO:0048732 Gland development	https://amigo.geneontology.org/amigo/term/GO:0048732	PDX1 SCRIB
0.112228229	1	50	3578153846	GO:0051489 Regulation of filopodium assembly	https://amigo.geneontology.org/amigo/term/GO:0051489	MYO3B
0.112228229	1	49	3651177394	GO:0060443 Mammary gland morphogenesis	https://amigo.geneontology.org/amigo/term/GO:0060443	SCRIB
0.112228229	1	50	3578153846	GO:0070741 Response to interleukin-6	https://amigo.geneontology.org/amigo/term/GO:0070741	JAK1
0.112228229	1	51	3507993967	GO:0090102 Cochlea development	https://amigo.geneontology.org/amigo/term/GO:0090102	MYO3B
0.1124646	1	52	3440532544	GO:0001881 Receptor recycling	https://amigo.geneontology.org/amigo/term/GO:0001881	SCRIB
0.114329964	2	487	7347338493	GO:0048568 Embryonic organ development	https://amigo.geneontology.org/amigo/term/GO:0048568	SCRIB MYO3B
0.115649253	1	54	3313105413	GO:0045197 Establishment or maintenance of epithelial cell apical/basal polarity	https://amigo.geneontology.org/amigo/term/GO:0045197	SCRIB
0.115723394	3	1263	4249588891	GO:0033043 Regulation of organelle organization	https://amigo.geneontology.org/amigo/term/GO:0033043	MYO3B TAPT1 STX5
0.115723394	1	55	3252867133	GO:0050798 Activated t cell proliferation	https://amigo.geneontology.org/amigo/term/GO:0050798	SCRIB
0.115723394	1	55	3252867133	GO:0060119 Inner ear receptor cell development	https://amigo.geneontology.org/amigo/term/GO:0060119	SCRIB
0.115723394	1	55	3252867133	GO:1903573 Negative regulation of response to endoplasmic reticulum stress	https://amigo.geneontology.org/amigo/term/GO:1903573	PDX1
0.116631122	1	56	319478022	GO:0042531 Positive regulation of tyrosine phosphorylation of stat protein	https://amigo.geneontology.org/amigo/term/GO:0042531	FGFR3
0.116631122	1	56	319478022	GO:0043368 Positive t cell selection	https://amigo.geneontology.org/amigo/term/GO:0043368	JAK1
0.118151079	1	57	3138731444	GO:0051452 Intracellular ph reduction	https://amigo.geneontology.org/amigo/term/GO:0051452	DMXL1
0.118597507	1	58	3084615385	GO:0048278 Vesicle docking	https://amigo.geneontology.org/amigo/term/GO:0048278	STX5
0.118597507	1	58	3084615385	GO:1903539 Protein localization to postsynaptic membrane	https://amigo.geneontology.org/amigo/term/GO:1903539	SCRIB
0.118597507	1	58	3084615385	GO:1904035 Regulation of epithelial cell apoptotic process	https://amigo.geneontology.org/amigo/term/GO:1904035	PDX1
0.118763759	1	60	2981794872	GO:0001738 Morphogenesis of a polarized epithelium	https://amigo.geneontology.org/amigo/term/GO:0001738	SCRIB
0.118763759	1	59	3032333768	GO:0006890 Retrograde vesicle-mediated transport golgi to endoplasmic reticulum	https://amigo.geneontology.org/amigo/term/GO:0006890	STX5
0.118763759	6	4782	2244764019	GO:0030154 Cell differentiation	https://amigo.geneontology.org/amigo/term/GO:0030154	PDX1 JAK1 TAPT1 SCRIB RNF41 FGFR3
0.118763759	1	59	3032333768	GO:0035088 Establishment or maintenance of apical/basal cell polarity	https://amigo.geneontology.org/amigo/term/GO:0035088	SCRIB
0.118763759	1	62	288560794	GO:0035094 Response to nicotine	https://amigo.geneontology.org/amigo/term/GO:0035094	PDX1
0.118763759	1	62	288560794	GO:0043113 Receptor clustering	https://amigo.geneontology.org/amigo/term/GO:0043113	SCRIB
0.118763759	6	4783	2244294698	GO:0048869 Cellular developmental process	https://amigo.geneontology.org/amigo/term/GO:0048869	PDX1 JAK1 TAPT1 SCRIB RNF41 FGFR3
0.118763759	1	61	2932912989	GO:0060350 Endochondral bone morphogenesis	https://amigo.geneontology.org/amigo/term/GO:0060350	FGFR3
0.118763759	3	1314	4084650509	GO:0060429 Epithelium development	https://amigo.geneontology.org/amigo/term/GO:0060429	PDX1 NOM1 SCRIB
0.118763759	1	61	2932912989	GO:0061178 Regulation of insulin secretion involved in cellular response to glucose stimulus	https://amigo.geneontology.org/amigo/term/GO:0061178	PDX1
0.118763759	1	59	3032333768	GO:0061245 Establishment or maintenance of bipolar cell polarity	https://amigo.geneontology.org/amigo/term/GO:0061245	SCRIB
0.118763759	1	61	2932912989	GO:0062237 Protein localization to postsynapse	https://amigo.geneontology.org/amigo/term/GO:0062237	SCRIB
0.118763759	1	60	2981794872	GO:0070542 Response to fatty acid	https://amigo.geneontology.org/amigo/term/GO:0070542	PDX1
0.118763759	1	61	2932912989	GO:0072538 T-helper 17 type immune response	https://amigo.geneontology.org/amigo/term/GO:0072538	JAK1
0.118763759	2	525	6815531136	GO:1903829 Positive regulation of protein localization	https://amigo.geneontology.org/amigo/term/GO:1903829	JAK1 PDX1
0.119676348	2	533	6713234233	GO:0002009 Morphogenesis of an epithelium	https://amigo.geneontology.org/amigo/term/GO:0002009	PDX1 SCRIB
0.119676348	3	1332	4029452529	GO:0006468 Protein phosphorylation	https://amigo.geneontology.org/amigo/term/GO:0006468	FGFR3 MYO3B JAK1
0.119676348	2	534	6700662633	GO:0023061 Signal release	https://amigo.geneontology.org/amigo/term/GO:0023061	PDX1 SCRIB
0.12238314	1	65	2752426036	GO:0042509 Regulation of tyrosine phosphorylation of stat protein	https://amigo.geneontology.org/amigo/term/GO:0042509	FGFR3
0.123729001	1	66	2710722611	GO:0035315 Hair cell differentiation	https://amigo.geneontology.org/amigo/term/GO:0035315	SCRIB
0.125163586	3	1362	3940698068	GO:0001775 Cell activation	https://amigo.geneontology.org/amigo/term/GO:0001775	SCRIB RNF41 JAK1
0.125445136	2	556	64355285	GO:0001501 Skeletal system development	https://amigo.geneontology.org/amigo/term/GO:0001501	TAPT1 FGFR3
0.125445136	1	68	2630995475	GO:0006903 Vesicle targeting	https://amigo.geneontology.org/amigo/term/GO:0006903	SCRIB
0.125445136	1	68	2630995475	GO:0031100 Animal organ regeneration	https://amigo.geneontology.org/amigo/term/GO:0031100	PDX1
0.125972063	1	70	2555824176	GO:0007260 Tyrosine phosphorylation of stat protein	https://amigo.geneontology.org/amigo/term/GO:0007260	FGFR3
0.125972063	2	559	640099078	GO:0044089 Positive regulation of cellular component biogenesis	https://amigo.geneontology.org/amigo/term/GO:0044089	MYO3B TAPT1
0.125972063	1	69	2592865106	GO:0045058 T cell selection	https://amigo.geneontology.org/amigo/term/GO:0045058	JAK1
0.125972063	1	70	2555824176	GO:0046847 Filopodium assembly	https://amigo.geneontology.org/amigo/term/GO:0046847	MYO3B
0.125972063	2	563	6355513048	GO:0051336 Regulation of hydrolase activity	https://amigo.geneontology.org/amigo/term/GO:0051336	FGFR3 SCRIB
0.125972063	1	70	2555824176	GO:0061951 Establishment of protein localization to plasma membrane	https://amigo.geneontology.org/amigo/term/GO:0061951	SCRIB
0.127241794	1	71	2519826652	GO:0035773 Insulin secretion involved in cellular response to glucose stimulus	https://amigo.geneontology.org/amigo/term/GO:0035773	PDX1
0.128500774	1	72	248482906	GO:0000423 Mitophagy	https://amigo.geneontology.org/amigo/term/GO:0000423	RNF41
0.128754883	1	73	2450790306	GO:0002067 Glandular epithelial cell differentiation	https://amigo.geneontology.org/amigo/term/GO:0002067	PDX1
0.128754883	1	73	2450790306	GO:0060113 Inner ear receptor cell differentiation	https://amigo.geneontology.org/amigo/term/GO:0060113	SCRIB
0.128754883	1	73	2450790306	GO:2000379 Positive regulation of reactive oxygen species metabolic process	https://amigo.geneontology.org/amigo/term/GO:2000379	RNF41
0.12972922	1	75	2385435897	GO:0008347 Glial cell migration	https://amigo.geneontology.org/amigo/term/GO:0008347	SCRIB
0.12972922	1	75	2385435897	GO:0048857 Neural nucleus development	https://amigo.geneontology.org/amigo/term/GO:0048857	SCRIB
0.12972922	1	75	2385435897	GO:0061035 Regulation of cartilage development	https://amigo.geneontology.org/amigo/term/GO:0061035	TAPT1
0.12972922	1	75	2385435897	GO:0061180 Mammary gland epithelium development	https://amigo.geneontology.org/amigo/term/GO:0061180	SCRIB
0.12972922	2	583	6137485156	GO:1903131 Mononuclear cell differentiation	https://amigo.geneontology.org/amigo/term/GO:1903131	RNF41 JAK1
0.130816972	3	1431	3750685373	GO:0016310 Phosphorylation	https://amigo.geneontology.org/amigo/term/GO:0016310	FGFR3 MYO3B JAK1
0.130816972	1	76	2354048583	GO:0140056 Organelle localization by membrane tethering	https://amigo.geneontology.org/amigo/term/GO:0140056	STX5
0.131148096	1	77	2323476523	GO:0043112 Receptor metabolic process	https://amigo.geneontology.org/amigo/term/GO:0043112	SCRIB
0.131148096	1	77	2323476523	GO:1902017 Regulation of cilium assembly	https://amigo.geneontology.org/amigo/term/GO:1902017	TAPT1
0.131357665	1	78	2293688363	GO:0002090 Regulation of receptor internalization	https://amigo.geneontology.org/amigo/term/GO:0002090	SCRIB
0.131357665	1	78	2293688363	GO:0070059 Intrinsic apoptotic signaling pathway in response to endoplasmic reticulum stress	https://amigo.geneontology.org/amigo/term/GO:0070059	PDX1
0.131357665	1	78	2293688363	GO:1903008 Organelle disassembly	https://amigo.geneontology.org/amigo/term/GO:1903008	STX5
0.132522138	1	79	2264654333	GO:0051865 Protein autoubiquitination	https://amigo.geneontology.org/amigo/term/GO:0051865	RNF41
0.133385595	2	606	5904544301	GO:0009896 Positive regulation of catabolic process	https://amigo.geneontology.org/amigo/term/GO:0009896	STX5 RNF41
0.133635855	3	1460	3676185458	GO:0007267 Cell-cell signaling	https://amigo.geneontology.org/amigo/term/GO:0007267	PDX1 FGFR3 SCRIB
0.133853284	1	81	2208736942	GO:0014032 Neural crest cell development	https://amigo.geneontology.org/amigo/term/GO:0014032	TAPT1
0.133853284	1	81	2208736942	GO:0140029 Exocytic process	https://amigo.geneontology.org/amigo/term/GO:0140029	SCRIB
0.134503346	1	82	2181801126	GO:0031016 Pancreas development	https://amigo.geneontology.org/amigo/term/GO:0031016	PDX1
0.134503346	1	82	2181801126	GO:0097120 Receptor localization to synapse	https://amigo.geneontology.org/amigo/term/GO:0097120	SCRIB
0.135918859	1	84	212985348	GO:0008543 Fibroblast growth factor receptor signaling pathway	https://amigo.geneontology.org/amigo/term/GO:0008543	FGFR3
0.135918859	1	84	212985348	GO:0009064 Glutamine family amino acid metabolic process	https://amigo.geneontology.org/amigo/term/GO:0009064	GGH
0.135918859	2	624	5734220907	GO:0010498 Proteasomal protein catabolic process	https://amigo.geneontology.org/amigo/term/GO:0010498	UBE2S RNF41
0.135918859	1	84	212985348	GO:0042490 Mechanoreceptor differentiation	https://amigo.geneontology.org/amigo/term/GO:0042490	SCRIB
0.135918859	1	85	210479638	GO:0098586 Cellular response to virus	https://amigo.geneontology.org/amigo/term/GO:0098586	JAK1
0.135918859	2	625	5725046154	GO:0120031 Plasma membrane bounded cell projection assembly	https://amigo.geneontology.org/amigo/term/GO:0120031	MYO3B TAPT1
0.135918859	1	85	210479638	GO:1904019 Epithelial cell apoptotic process	https://amigo.geneontology.org/amigo/term/GO:1904019	PDX1
0.13610223	1	89	201019879	GO:0001843 Neural tube closure	https://amigo.geneontology.org/amigo/term/GO:0001843	SCRIB
0.13610223	1	99	1807148407	GO:0001942 Hair follicle development	https://amigo.geneontology.org/amigo/term/GO:0001942	NOM1
0.13610223	1	95	1883238866	GO:0002287 Alpha-beta t cell activation involved in immune response	https://amigo.geneontology.org/amigo/term/GO:0002287	JAK1
0.13610223	1	95	1883238866	GO:0002293 Alpha-beta t cell differentiation involved in immune response	https://amigo.geneontology.org/amigo/term/GO:0002293	JAK1
0.13610223	1	94	1903273322	GO:0002294 Cd4-positive alpha-beta t cell differentiation involved in immune response	https://amigo.geneontology.org/amigo/term/GO:0002294	JAK1
0.13610223	2	653	5479561786	GO:0007169 Cell surface receptor protein tyrosine kinase signaling pathway	https://amigo.geneontology.org/amigo/term/GO:0007169	JAK1 FGFR3
0.13610223	2	645	5547525343	GO:0007423 Sensory organ development	https://amigo.geneontology.org/amigo/term/GO:0007423	SCRIB MYO3B
0.13610223	3	1581	3394832871	GO:0009057 Macromolecule catabolic process	https://amigo.geneontology.org/amigo/term/GO:0009057	UBE2S RNF41 STX5
0.13610223	3	1566	3427350427	GO:0009719 Response to endogenous stimulus	https://amigo.geneontology.org/amigo/term/GO:0009719	JAK1 FGFR3 PDX1
0.13610223	1	95	1883238866	GO:0014020 Primary neural tube formation	https://amigo.geneontology.org/amigo/term/GO:0014020	SCRIB
0.13610223	1	96	1863621795	GO:0014033 Neural crest cell differentiation	https://amigo.geneontology.org/amigo/term/GO:0014033	TAPT1
0.13610223	3	1549	346496499	GO:0015031 Protein transport	https://amigo.geneontology.org/amigo/term/GO:0015031	STX5 SCRIB PDX1
0.13610223	1	100	1789076923	GO:0016079 Synaptic vesicle exocytosis	https://amigo.geneontology.org/amigo/term/GO:0016079	SCRIB
0.13610223	1	86	2080322004	GO:0022406 Membrane docking	https://amigo.geneontology.org/amigo/term/GO:0022406	STX5
0.13610223	2	653	5479561786	GO:0022407 Regulation of cell-cell adhesion	https://amigo.geneontology.org/amigo/term/GO:0022407	SCRIB JAK1
0.13610223	2	638	5608391608	GO:0030031 Cell projection assembly	https://amigo.geneontology.org/amigo/term/GO:0030031	MYO3B TAPT1
0.13610223	1	95	1883238866	GO:0030641 Regulation of cellular ph	https://amigo.geneontology.org/amigo/term/GO:0030641	DMXL1
0.13610223	2	682	5246559892	GO:0031344 Regulation of cell projection organization	https://amigo.geneontology.org/amigo/term/GO:0031344	MYO3B TAPT1
0.13610223	2	685	5223582257	GO:0031401 Positive regulation of protein modification process	https://amigo.geneontology.org/amigo/term/GO:0031401	UBE2S FGFR3
0.13610223	1	91	1966018597	GO:0032024 Positive regulation of insulin secretion	https://amigo.geneontology.org/amigo/term/GO:0032024	PDX1
0.13610223	1	95	1883238866	GO:0032456 Endocytic recycling	https://amigo.geneontology.org/amigo/term/GO:0032456	SCRIB
0.13610223	1	95	1883238866	GO:0032729 Positive regulation of type ii interferon production	https://amigo.geneontology.org/amigo/term/GO:0032729	SCRIB
0.13610223	1	100	1789076923	GO:0033273 Response to vitamin	https://amigo.geneontology.org/amigo/term/GO:0033273	PDX1
0.13610223	1	93	1923738627	GO:0034340 Response to type i interferon	https://amigo.geneontology.org/amigo/term/GO:0034340	JAK1
0.13610223	1	97	1844409199	GO:0035418 Protein localization to synapse	https://amigo.geneontology.org/amigo/term/GO:0035418	SCRIB
0.13610223	1	100	1789076923	GO:0036465 Synaptic vesicle recycling	https://amigo.geneontology.org/amigo/term/GO:0036465	SCRIB
0.13610223	1	92	1944648829	GO:0042093 T-helper cell differentiation	https://amigo.geneontology.org/amigo/term/GO:0042093	JAK1
0.13610223	1	96	1863621795	GO:0042130 Negative regulation of t cell proliferation	https://amigo.geneontology.org/amigo/term/GO:0042130	SCRIB
0.13610223	2	685	5223582257	GO:0043009 Chordate embryonic development	https://amigo.geneontology.org/amigo/term/GO:0043009	TAPT1 SCRIB
0.13610223	2	674	53088336	GO:0043408 Regulation of mapk cascade	https://amigo.geneontology.org/amigo/term/GO:0043408	FGFR3 RNF41
0.13610223	1	87	2056410256	GO:0048488 Synaptic vesicle endocytosis	https://amigo.geneontology.org/amigo/term/GO:0048488	SCRIB
0.13610223	1	96	1863621795	GO:0048640 Negative regulation of developmental growth	https://amigo.geneontology.org/amigo/term/GO:0048640	FGFR3
0.13610223	2	651	5496396077	GO:0048729 Tissue morphogenesis	https://amigo.geneontology.org/amigo/term/GO:0048729	PDX1 SCRIB
0.13610223	1	88	2033041958	GO:0048864 Stem cell development	https://amigo.geneontology.org/amigo/term/GO:0048864	TAPT1
0.13610223	4	2666	2684286456	GO:0050793 Regulation of developmental process	https://amigo.geneontology.org/amigo/term/GO:0050793	RNF41 JAK1 FGFR3 TAPT1
0.13610223	1	89	201019879	GO:0050918 Positive chemotaxis	https://amigo.geneontology.org/amigo/term/GO:0050918	SCRIB
0.13610223	4	2629	2722064546	GO:0051128 Regulation of cellular component organization	https://amigo.geneontology.org/amigo/term/GO:0051128	MYO3B TAPT1 STX5 SCRIB
0.13610223	2	645	5547525343	GO:0051249 Regulation of lymphocyte activation	https://amigo.geneontology.org/amigo/term/GO:0051249	SCRIB RNF41
0.13610223	1	91	1966018597	GO:0051453 Regulation of intracellular ph	https://amigo.geneontology.org/amigo/term/GO:0051453	DMXL1
0.13610223	2	644	5556139513	GO:0051640 Organelle localization	https://amigo.geneontology.org/amigo/term/GO:0051640	STX5 SCRIB
0.13610223	1	86	2080322004	GO:0060337 Type i interferon-mediated signaling pathway	https://amigo.geneontology.org/amigo/term/GO:0060337	JAK1
0.13610223	1	90	1987863248	GO:0060606 Tube closure	https://amigo.geneontology.org/amigo/term/GO:0060606	SCRIB
0.13610223	1	88	2033041958	GO:0070534 Protein k63-linked ubiquitination	https://amigo.geneontology.org/amigo/term/GO:0070534	UBE2S
0.13610223	1	87	2056410256	GO:0071357 Cellular response to type i interferon	https://amigo.geneontology.org/amigo/term/GO:0071357	JAK1
0.13610223	2	665	5380682475	GO:0120035 Regulation of plasma membrane bounded cell projection organization	https://amigo.geneontology.org/amigo/term/GO:0120035	MYO3B TAPT1
0.13610223	1	91	1966018597	GO:0140238 Presynaptic endocytosis	https://amigo.geneontology.org/amigo/term/GO:0140238	SCRIB
0.13610223	1	98	1825588697	GO:1900182 Positive regulation of protein localization to nucleus	https://amigo.geneontology.org/amigo/term/GO:1900182	JAK1
0.13610223	1	99	1807148407	GO:1902117 Positive regulation of organelle assembly	https://amigo.geneontology.org/amigo/term/GO:1902117	TAPT1
0.13610223	3	1531	3505702658	GO:2000026 Regulation of multicellular organismal development	https://amigo.geneontology.org/amigo/term/GO:2000026	RNF41 JAK1 TAPT1
0.136676436	1	102	1753996983	GO:0001841 Neural tube formation	https://amigo.geneontology.org/amigo/term/GO:0001841	SCRIB
0.136676436	1	102	1753996983	GO:0010507 Negative regulation of autophagy	https://amigo.geneontology.org/amigo/term/GO:0010507	RNF41
0.136676436	1	102	1753996983	GO:0022404 Molting cycle process	https://amigo.geneontology.org/amigo/term/GO:0022404	NOM1
0.136676436	1	102	1753996983	GO:0022405 Hair cycle process	https://amigo.geneontology.org/amigo/term/GO:0022405	NOM1
0.136676436	1	102	1753996983	GO:1905897 Regulation of response to endoplasmic reticulum stress	https://amigo.geneontology.org/amigo/term/GO:1905897	PDX1
0.137577549	1	103	1736967886	GO:0060349 Bone morphogenesis	https://amigo.geneontology.org/amigo/term/GO:0060349	FGFR3
0.138070199	1	104	1720266272	GO:0002292 T cell differentiation involved in immune response	https://amigo.geneontology.org/amigo/term/GO:0002292	JAK1
0.138070199	1	104	1720266272	GO:0043279 Response to alkaloid	https://amigo.geneontology.org/amigo/term/GO:0043279	PDX1
0.139437207	2	707	5061037972	GO:0002521 Leukocyte differentiation	https://amigo.geneontology.org/amigo/term/GO:0002521	RNF41 JAK1
0.139437207	1	106	1687808418	GO:0006885 Regulation of ph	https://amigo.geneontology.org/amigo/term/GO:0006885	DMXL1
0.139437207	2	706	5068206581	GO:0009792 Embryo development ending in birth or egg hatching	https://amigo.geneontology.org/amigo/term/GO:0009792	TAPT1 SCRIB
0.140312202	1	107	1672034508	GO:0000422 Autophagy of mitochondrion	https://amigo.geneontology.org/amigo/term/GO:0000422	RNF41
0.141434319	2	715	5004410974	GO:0002694 Regulation of leukocyte activation	https://amigo.geneontology.org/amigo/term/GO:0002694	SCRIB RNF41
0.141908605	4	2767	2586305635	GO:0008104 Protein localization	https://amigo.geneontology.org/amigo/term/GO:0008104	STX5 SCRIB PDX1 JAK1
0.14300335	4	2779	2575137709	GO:0070727 Cellular macromolecule localization	https://amigo.geneontology.org/amigo/term/GO:0070727	STX5 SCRIB PDX1 JAK1
0.14300335	3	1654	3245000465	GO:0120036 Plasma membrane bounded cell projection organization	https://amigo.geneontology.org/amigo/term/GO:0120036	MYO3B TAPT1 SCRIB
0.143969386	2	728	4915046492	GO:0006886 Intracellular protein transport	https://amigo.geneontology.org/amigo/term/GO:0006886	STX5 SCRIB
0.143969386	2	728	4915046492	GO:0042110 T cell activation	https://amigo.geneontology.org/amigo/term/GO:0042110	SCRIB JAK1
0.144627618	1	113	1583253914	GO:0031398 Positive regulation of protein ubiquitination	https://amigo.geneontology.org/amigo/term/GO:0031398	UBE2S
0.144627618	1	113	1583253914	GO:0044344 Cellular response to fibroblast growth factor stimulus	https://amigo.geneontology.org/amigo/term/GO:0044344	FGFR3
0.14546151	1	114	1569365722	GO:0043367 Cd4-positive alpha-beta t cell differentiation	https://amigo.geneontology.org/amigo/term/GO:0043367	JAK1
0.146290104	1	115	1555719064	GO:2001243 Negative regulation of intrinsic apoptotic signaling pathway	https://amigo.geneontology.org/amigo/term/GO:2001243	PDX1
0.147113442	1	116	1542307692	GO:0042147 Retrograde transport endosome to golgi	https://amigo.geneontology.org/amigo/term/GO:0042147	STX5
0.14793157	1	117	1529125575	GO:0140888 Interferon-mediated signaling pathway	https://amigo.geneontology.org/amigo/term/GO:0140888	JAK1
0.148730652	3	1699	3159052837	GO:0030030 Cell projection organization	https://amigo.geneontology.org/amigo/term/GO:0030030	MYO3B TAPT1 SCRIB
0.148730652	1	119	1503425986	GO:0034109 Homotypic cell-cell adhesion	https://amigo.geneontology.org/amigo/term/GO:0034109	JAK1
0.148730652	1	119	1503425986	GO:0050672 Negative regulation of lymphocyte proliferation	https://amigo.geneontology.org/amigo/term/GO:0050672	SCRIB
0.148730652	1	119	1503425986	GO:0090277 Positive regulation of peptide hormone secretion	https://amigo.geneontology.org/amigo/term/GO:0090277	PDX1
0.149379798	1	121	1478575969	GO:0002793 Positive regulation of peptide secretion	https://amigo.geneontology.org/amigo/term/GO:0002793	PDX1
0.149379798	1	121	1478575969	GO:0022037 Metencephalon development	https://amigo.geneontology.org/amigo/term/GO:0022037	SCRIB
0.149379798	1	121	1478575969	GO:0032945 Negative regulation of mononuclear cell proliferation	https://amigo.geneontology.org/amigo/term/GO:0032945	SCRIB
0.149379798	2	761	4701910442	GO:0055082 Intracellular chemical homeostasis	https://amigo.geneontology.org/amigo/term/GO:0055082	DMXL1 PDX1
0.149379798	1	121	1478575969	GO:0071774 Response to fibroblast growth factor	https://amigo.geneontology.org/amigo/term/GO:0071774	FGFR3
0.151452783	1	124	144280397	GO:0001838 Embryonic epithelial tube formation	https://amigo.geneontology.org/amigo/term/GO:0001838	SCRIB
0.151452783	1	124	144280397	GO:0002062 Chondrocyte differentiation	https://amigo.geneontology.org/amigo/term/GO:0002062	FGFR3
0.151452783	1	124	144280397	GO:0099072 Regulation of postsynaptic membrane neurotransmitter receptor levels	https://amigo.geneontology.org/amigo/term/GO:0099072	SCRIB
0.152994193	1	126	141990232	GO:0043200 Response to amino acid	https://amigo.geneontology.org/amigo/term/GO:0043200	PDX1
0.152994193	1	126	141990232	GO:0048259 Regulation of receptor-mediated endocytosis	https://amigo.geneontology.org/amigo/term/GO:0048259	SCRIB
0.153583015	2	788	4540804373	GO:0000165 Mapk cascade	https://amigo.geneontology.org/amigo/term/GO:0000165	FGFR3 RNF41
0.153583015	1	128	1397716346	GO:0006906 Vesicle fusion	https://amigo.geneontology.org/amigo/term/GO:0006906	STX5
0.153583015	1	128	1397716346	GO:0031330 Negative regulation of cellular catabolic process	https://amigo.geneontology.org/amigo/term/GO:0031330	RNF41
0.153583015	1	129	1386881336	GO:0042274 Ribosomal small subunit biogenesis	https://amigo.geneontology.org/amigo/term/GO:0042274	NOM1
0.153583015	1	130	1376213018	GO:0042303 Molting cycle	https://amigo.geneontology.org/amigo/term/GO:0042303	NOM1
0.153583015	1	130	1376213018	GO:0042633 Hair cycle	https://amigo.geneontology.org/amigo/term/GO:0042633	NOM1
0.153583015	2	788	4540804373	GO:0050865 Regulation of cell activation	https://amigo.geneontology.org/amigo/term/GO:0050865	SCRIB RNF41
0.153583015	1	130	1376213018	GO:0070664 Negative regulation of leukocyte proliferation	https://amigo.geneontology.org/amigo/term/GO:0070664	SCRIB
0.153583015	1	127	1408721987	GO:0071346 Cellular response to type ii interferon	https://amigo.geneontology.org/amigo/term/GO:0071346	JAK1
0.153583015	1	130	1376213018	GO:0090174 Organelle membrane fusion	https://amigo.geneontology.org/amigo/term/GO:0090174	STX5
0.155121869	1	132	1355361305	GO:0048706 Embryonic skeletal system development	https://amigo.geneontology.org/amigo/term/GO:0048706	TAPT1
0.155121869	3	1776	3022089397	GO:0065009 Regulation of molecular function	https://amigo.geneontology.org/amigo/term/GO:0065009	UBE2S FGFR3 SCRIB
0.155387951	1	133	1345170619	GO:0022612 Gland morphogenesis	https://amigo.geneontology.org/amigo/term/GO:0022612	SCRIB
0.155387951	2	800	4472692308	GO:0030855 Epithelial cell differentiation	https://amigo.geneontology.org/amigo/term/GO:0030855	PDX1 SCRIB
0.158248296	5	4287	2086630421	GO:0048731 System development	https://amigo.geneontology.org/amigo/term/GO:0048731	PDX1 TAPT1 SCRIB JAK1 FGFR3
0.158248296	1	137	1305895564	GO:0072175 Epithelial tube formation	https://amigo.geneontology.org/amigo/term/GO:0072175	SCRIB
0.158248296	1	137	1305895564	GO:0098773 Skin epidermis development	https://amigo.geneontology.org/amigo/term/GO:0098773	NOM1
0.158248296	1	137	1305895564	GO:1901875 Positive regulation of post-translational protein modification	https://amigo.geneontology.org/amigo/term/GO:1901875	UBE2S
0.158248296	1	136	1315497738	GO:1903322 Positive regulation of protein modification by small protein conjugation or removal	https://amigo.geneontology.org/amigo/term/GO:1903322	UBE2S
0.159572003	1	140	1277912088	GO:0001101 Response to acid chemical	https://amigo.geneontology.org/amigo/term/GO:0001101	PDX1
0.159572003	1	139	12871057	GO:0002040 Sprouting angiogenesis	https://amigo.geneontology.org/amigo/term/GO:0002040	JAK1
0.159572003	1	140	1277912088	GO:0002065 Columnar/cuboidal epithelial cell differentiation	https://amigo.geneontology.org/amigo/term/GO:0002065	PDX1
0.159572003	1	140	1277912088	GO:0030282 Bone mineralization	https://amigo.geneontology.org/amigo/term/GO:0030282	FGFR3
0.160266981	1	141	1268848882	GO:0050680 Negative regulation of epithelial cell proliferation	https://amigo.geneontology.org/amigo/term/GO:0050680	PDX1
0.162049938	1	143	1251102743	GO:0032649 Regulation of type ii interferon production	https://amigo.geneontology.org/amigo/term/GO:0032649	SCRIB
0.162327729	1	144	124241453	GO:0032609 Type ii interferon production	https://amigo.geneontology.org/amigo/term/GO:0032609	SCRIB
0.162327729	1	144	124241453	GO:0051384 Response to glucocorticoid	https://amigo.geneontology.org/amigo/term/GO:0051384	PDX1
0.163006685	1	145	1233846154	GO:0048565 Digestive tract development	https://amigo.geneontology.org/amigo/term/GO:0048565	PDX1
0.163276558	1	146	1225395153	GO:0035270 Endocrine system development	https://amigo.geneontology.org/amigo/term/GO:0035270	PDX1
0.163276558	1	146	1225395153	GO:0043547 Positive regulation of gtpase activity	https://amigo.geneontology.org/amigo/term/GO:0043547	SCRIB
0.163947026	1	147	1217059131	GO:0046632 Alpha-beta t cell differentiation	https://amigo.geneontology.org/amigo/term/GO:0046632	JAK1
0.164007898	1	148	1208835759	GO:0006888 Endoplasmic reticulum to golgi vesicle-mediated transport	https://amigo.geneontology.org/amigo/term/GO:0006888	STX5
0.164007898	1	148	1208835759	GO:0031623 Receptor internalization	https://amigo.geneontology.org/amigo/term/GO:0031623	SCRIB
0.164007898	3	1860	288560794	GO:0045184 Establishment of protein localization	https://amigo.geneontology.org/amigo/term/GO:0045184	STX5 SCRIB PDX1
0.164019559	4	3054	2343257267	GO:0048468 Cell development	https://amigo.geneontology.org/amigo/term/GO:0048468	SCRIB RNF41 TAPT1 JAK1
0.164067075	1	149	1200722767	GO:0030879 Mammary gland development	https://amigo.geneontology.org/amigo/term/GO:0030879	SCRIB
0.164641088	1	152	1177024291	GO:0001889 Liver development	https://amigo.geneontology.org/amigo/term/GO:0001889	PDX1
0.164641088	1	156	1146844181	GO:0002286 T cell activation involved in immune response	https://amigo.geneontology.org/amigo/term/GO:0002286	JAK1
0.164641088	4	3099	2309231266	GO:0007166 Cell surface receptor signaling pathway	https://amigo.geneontology.org/amigo/term/GO:0007166	JAK1 FGFR3 RNF41 PDX1
0.164641088	1	154	1161738262	GO:0007224 Smoothened signaling pathway	https://amigo.geneontology.org/amigo/term/GO:0007224	PDX1
0.164641088	1	152	1177024291	GO:0007269 Neurotransmitter secretion	https://amigo.geneontology.org/amigo/term/GO:0007269	SCRIB
0.164641088	1	156	1146844181	GO:0016482 Cytosolic transport	https://amigo.geneontology.org/amigo/term/GO:0016482	STX5
0.164641088	1	153	1169331322	GO:0034341 Response to type ii interferon	https://amigo.geneontology.org/amigo/term/GO:0034341	JAK1
0.164641088	1	150	1192717949	GO:0035148 Tube formation	https://amigo.geneontology.org/amigo/term/GO:0035148	SCRIB
0.164641088	1	154	1161738262	GO:0046887 Positive regulation of hormone secretion	https://amigo.geneontology.org/amigo/term/GO:0046887	PDX1
0.164641088	1	152	1177024291	GO:0050714 Positive regulation of protein secretion	https://amigo.geneontology.org/amigo/term/GO:0050714	PDX1
0.164641088	1	156	1146844181	GO:0055123 Digestive system development	https://amigo.geneontology.org/amigo/term/GO:0055123	PDX1
0.164641088	1	155	1154243176	GO:0061008 Hepaticobiliary system development	https://amigo.geneontology.org/amigo/term/GO:0061008	PDX1
0.164641088	1	156	1146844181	GO:0071326 Cellular response to monosaccharide stimulus	https://amigo.geneontology.org/amigo/term/GO:0071326	PDX1
0.164641088	1	154	1161738262	GO:0071331 Cellular response to hexose stimulus	https://amigo.geneontology.org/amigo/term/GO:0071331	PDX1
0.164641088	1	151	1184819154	GO:0071333 Cellular response to glucose stimulus	https://amigo.geneontology.org/amigo/term/GO:0071333	PDX1
0.164641088	1	152	1177024291	GO:0099643 Signal release from synapse	https://amigo.geneontology.org/amigo/term/GO:0099643	SCRIB
0.164641088	1	154	1161738262	GO:1900180 Regulation of protein localization to nucleus	https://amigo.geneontology.org/amigo/term/GO:1900180	JAK1
0.164881836	1	157	1139539441	GO:0007030 Golgi organization	https://amigo.geneontology.org/amigo/term/GO:0007030	STX5
0.164881836	1	157	1139539441	GO:2000377 Regulation of reactive oxygen species metabolic process	https://amigo.geneontology.org/amigo/term/GO:2000377	RNF41
0.165503829	1	158	1132327167	GO:0035710 Cd4-positive alpha-beta t cell activation	https://amigo.geneontology.org/amigo/term/GO:0035710	JAK1
0.167063892	2	887	4033995317	GO:0016567 Protein ubiquitination	https://amigo.geneontology.org/amigo/term/GO:0016567	UBE2S RNF41
0.168056934	1	163	1097593204	GO:0021915 Neural tube development	https://amigo.geneontology.org/amigo/term/GO:0021915	SCRIB
0.168056934	3	1938	2769468921	GO:0023056 Positive regulation of signaling	https://amigo.geneontology.org/amigo/term/GO:0023056	FGFR3 PDX1 SCRIB
0.168056934	1	164	1090900563	GO:0030010 Establishment of cell polarity	https://amigo.geneontology.org/amigo/term/GO:0030010	SCRIB
0.168056934	1	163	1097593204	GO:0030832 Regulation of actin filament length	https://amigo.geneontology.org/amigo/term/GO:0030832	MYO3B
0.168056934	1	166	1077757183	GO:0030902 Hindbrain development	https://amigo.geneontology.org/amigo/term/GO:0030902	SCRIB
0.168056934	1	166	1077757183	GO:0031960 Response to corticosteroid	https://amigo.geneontology.org/amigo/term/GO:0031960	PDX1
0.168056934	1	166	1077757183	GO:0035265 Organ growth	https://amigo.geneontology.org/amigo/term/GO:0035265	FGFR3
0.168056934	1	162	1104368471	GO:0050731 Positive regulation of peptidyl-tyrosine phosphorylation	https://amigo.geneontology.org/amigo/term/GO:0050731	FGFR3
0.168056934	1	166	1077757183	GO:0050868 Negative regulation of t cell activation	https://amigo.geneontology.org/amigo/term/GO:0050868	SCRIB
0.168056934	3	1931	2779508425	GO:0051240 Positive regulation of multicellular organismal process	https://amigo.geneontology.org/amigo/term/GO:0051240	SCRIB JAK1 TAPT1
0.168056934	2	896	3993475275	GO:0051603 Proteolysis involved in protein catabolic process	https://amigo.geneontology.org/amigo/term/GO:0051603	UBE2S RNF41
0.168056934	1	166	1077757183	GO:0071322 Cellular response to carbohydrate stimulus	https://amigo.geneontology.org/amigo/term/GO:0071322	PDX1
0.168056934	1	166	1077757183	GO:0098876 Vesicle-mediated transport to the plasma membrane	https://amigo.geneontology.org/amigo/term/GO:0098876	SCRIB
0.170051104	2	913	3919117028	GO:0032940 Secretion by cell	https://amigo.geneontology.org/amigo/term/GO:0032940	PDX1 SCRIB
0.170413889	4	3185	2246878396	GO:0065008 Regulation of biological quality	https://amigo.geneontology.org/amigo/term/GO:0065008	MYO3B DMXL1 SCRIB PDX1
0.170776783	1	170	105239819	GO:0007605 Sensory perception of sound	https://amigo.geneontology.org/amigo/term/GO:0007605	MYO3B
0.171546341	1	172	1040161002	GO:0001678 Intracellular glucose homeostasis	https://amigo.geneontology.org/amigo/term/GO:0001678	PDX1
0.171546341	2	923	3876656388	GO:0035239 Tube morphogenesis	https://amigo.geneontology.org/amigo/term/GO:0035239	SCRIB JAK1
0.171546341	1	172	1040161002	GO:0045766 Positive regulation of angiogenesis	https://amigo.geneontology.org/amigo/term/GO:0045766	JAK1
0.173633025	1	175	102232967	GO:0048284 Organelle fusion	https://amigo.geneontology.org/amigo/term/GO:0048284	STX5
0.173633025	1	175	102232967	GO:1904018 Positive regulation of vasculature development	https://amigo.geneontology.org/amigo/term/GO:1904018	JAK1
0.174754469	1	177	1010777923	GO:0007584 Response to nutrient	https://amigo.geneontology.org/amigo/term/GO:0007584	PDX1
0.174754469	1	177	1010777923	GO:1903038 Negative regulation of leukocyte cell-cell adhesion	https://amigo.geneontology.org/amigo/term/GO:1903038	SCRIB
0.175825538	4	3241	2208055443	GO:0035556 Intracellular signal transduction	https://amigo.geneontology.org/amigo/term/GO:0035556	FGFR3 JAK1 RNF41 PDX1
0.178252567	2	952	3758564964	GO:0032880 Regulation of protein localization	https://amigo.geneontology.org/amigo/term/GO:0032880	JAK1 PDX1
0.181054491	2	962	3719494643	GO:0009725 Response to hormone	https://amigo.geneontology.org/amigo/term/GO:0009725	JAK1 PDX1
0.182501744	4	3290	2175169511	GO:0033036 Macromolecule localization	https://amigo.geneontology.org/amigo/term/GO:0033036	STX5 SCRIB PDX1 JAK1
0.182984244	2	972	3681228237	GO:0030155 Regulation of cell adhesion	https://amigo.geneontology.org/amigo/term/GO:0030155	JAK1 SCRIB
0.182984244	2	973	3677444857	GO:0032446 Protein modification by small protein conjugation	https://amigo.geneontology.org/amigo/term/GO:0032446	UBE2S RNF41
0.182984244	1	188	9516366612	GO:2001242 Regulation of intrinsic apoptotic signaling pathway	https://amigo.geneontology.org/amigo/term/GO:2001242	PDX1
0.183854444	2	979	3654906891	GO:0000278 Mitotic cell cycle	https://amigo.geneontology.org/amigo/term/GO:0000278	UBE2S SCRIB
0.183854444	1	191	9366894885	GO:0006006 Glucose metabolic process	https://amigo.geneontology.org/amigo/term/GO:0006006	PDX1
0.183854444	1	191	9366894885	GO:0050796 Regulation of insulin secretion	https://amigo.geneontology.org/amigo/term/GO:0050796	PDX1
0.184950727	3	2069	2594118303	GO:0071705 Nitrogen compound transport	https://amigo.geneontology.org/amigo/term/GO:0071705	STX5 SCRIB PDX1
0.185798468	1	194	9222045995	GO:0006575 Cellular modified amino acid metabolic process	https://amigo.geneontology.org/amigo/term/GO:0006575	GGH
0.185933794	2	991	3610649693	GO:0140352 Export from cell	https://amigo.geneontology.org/amigo/term/GO:0140352	PDX1 SCRIB
0.185933794	1	195	9174753452	GO:0170039 Proteinogenic amino acid metabolic process	https://amigo.geneontology.org/amigo/term/GO:0170039	GGH
0.186922815	1	197	9081608747	GO:0031214 Biomineral tissue development	https://amigo.geneontology.org/amigo/term/GO:0031214	FGFR3
0.186922815	1	197	9081608747	GO:0050954 Sensory perception of mechanical stimulus	https://amigo.geneontology.org/amigo/term/GO:0050954	MYO3B
0.18742497	1	198	9035742036	GO:0016241 Regulation of macroautophagy	https://amigo.geneontology.org/amigo/term/GO:0016241	RNF41
0.187432277	4	3355	2133027628	GO:0051239 Regulation of multicellular organismal process	https://amigo.geneontology.org/amigo/term/GO:0051239	JAK1 SCRIB RNF41 TAPT1
0.189009895	4	3374	2121015914	GO:0031325 Positive regulation of cellular metabolic process	https://amigo.geneontology.org/amigo/term/GO:0031325	PDX1 SCRIB FGFR3 RNF41
0.189009895	1	201	8900880214	GO:0051897 Positive regulation of phosphatidylinositol 3-kinase/protein kinase b signal transduction	https://amigo.geneontology.org/amigo/term/GO:0051897	FGFR3
0.189009895	1	202	8856816451	GO:0061025 Membrane fusion	https://amigo.geneontology.org/amigo/term/GO:0061025	STX5
0.189009895	1	202	8856816451	GO:0170033 L-amino acid metabolic process	https://amigo.geneontology.org/amigo/term/GO:0170033	GGH
0.191268474	1	205	8727204503	GO:0031099 Regeneration	https://amigo.geneontology.org/amigo/term/GO:0031099	PDX1
0.191750503	1	206	8684839432	GO:0051650 Establishment of vesicle localization	https://amigo.geneontology.org/amigo/term/GO:0051650	SCRIB
0.192781033	2	1028	3480694403	GO:0007167 Enzyme-linked receptor protein signaling pathway	https://amigo.geneontology.org/amigo/term/GO:0007167	JAK1 FGFR3
0.192781033	1	209	8560176665	GO:0009749 Response to glucose	https://amigo.geneontology.org/amigo/term/GO:0009749	PDX1
0.192781033	1	208	8601331361	GO:0051250 Negative regulation of lymphocyte activation	https://amigo.geneontology.org/amigo/term/GO:0051250	SCRIB
0.192781033	1	209	8560176665	GO:0070374 Positive regulation of erk1 and erk2 cascade	https://amigo.geneontology.org/amigo/term/GO:0070374	FGFR3
0.195389547	3	2154	2491750589	GO:1902531 Regulation of intracellular signal transduction	https://amigo.geneontology.org/amigo/term/GO:1902531	FGFR3 RNF41 PDX1
0.195459393	1	213	8399422174	GO:0050679 Positive regulation of epithelial cell proliferation	https://amigo.geneontology.org/amigo/term/GO:0050679	PDX1
0.195519077	1	214	8360172538	GO:0009746 Response to hexose	https://amigo.geneontology.org/amigo/term/GO:0009746	PDX1
0.195519077	3	2160	248482906	GO:0051649 Establishment of localization in cell	https://amigo.geneontology.org/amigo/term/GO:0051649	STX5 SCRIB PDX1
0.197430145	1	218	8206774876	GO:0031396 Regulation of protein ubiquitination	https://amigo.geneontology.org/amigo/term/GO:0031396	UBE2S
0.197430145	1	219	8169301019	GO:0031503 Protein-containing complex localization	https://amigo.geneontology.org/amigo/term/GO:0031503	SCRIB
0.197430145	3	2174	2468827401	GO:0032879 Regulation of localization	https://amigo.geneontology.org/amigo/term/GO:0032879	JAK1 PDX1 SCRIB
0.197430145	1	218	8206774876	GO:0043087 Regulation of gtpase activity	https://amigo.geneontology.org/amigo/term/GO:0043087	SCRIB
0.197430145	2	1058	3381997964	GO:0046903 Secretion	https://amigo.geneontology.org/amigo/term/GO:0046903	PDX1 SCRIB
0.197430145	1	219	8169301019	GO:0050730 Regulation of peptidyl-tyrosine phosphorylation	https://amigo.geneontology.org/amigo/term/GO:0050730	FGFR3
0.197491187	1	221	8095370693	GO:0006836 Neurotransmitter transport	https://amigo.geneontology.org/amigo/term/GO:0006836	SCRIB
0.197491187	2	1063	3366090166	GO:0008284 Positive regulation of cell population proliferation	https://amigo.geneontology.org/amigo/term/GO:0008284	FGFR3 PDX1
0.197491187	1	221	8095370693	GO:0034284 Response to monosaccharide	https://amigo.geneontology.org/amigo/term/GO:0034284	PDX1
0.197491187	2	1062	3369259742	GO:0060341 Regulation of cellular localization	https://amigo.geneontology.org/amigo/term/GO:0060341	JAK1 PDX1
0.197829706	2	1067	3353471271	GO:0030097 Hemopoiesis	https://amigo.geneontology.org/amigo/term/GO:0030097	RNF41 JAK1
0.197829706	2	1067	3353471271	GO:0034097 Response to cytokine	https://amigo.geneontology.org/amigo/term/GO:0034097	JAK1 PDX1
0.199254071	1	225	7951452991	GO:0030073 Insulin secretion	https://amigo.geneontology.org/amigo/term/GO:0030073	PDX1
0.199254071	1	225	7951452991	GO:0090276 Regulation of peptide hormone secretion	https://amigo.geneontology.org/amigo/term/GO:0090276	PDX1
0.199726443	2	1077	3322334119	GO:0033365 Protein localization to organelle	https://amigo.geneontology.org/amigo/term/GO:0033365	SCRIB JAK1
0.199759023	1	228	784682861	GO:0002791 Regulation of peptide secretion	https://amigo.geneontology.org/amigo/term/GO:0002791	PDX1
0.199759023	1	227	7881396137	GO:0051648 Vesicle localization	https://amigo.geneontology.org/amigo/term/GO:0051648	SCRIB
0.199759023	1	228	784682861	GO:0090087 Regulation of peptide transport	https://amigo.geneontology.org/amigo/term/GO:0090087	PDX1
0.199759023	2	1082	3306981374	GO:1901652 Response to peptide	https://amigo.geneontology.org/amigo/term/GO:1901652	JAK1 PDX1

## Sheet: March_enrichment_in_NR
Enrichment FDR	nGenes	Pathway Genes	Fold Enrichment	Pathway	URL	Genes
0.021032917993547	3	64	545109375	GO:0042255 Ribosome assembly	https://amigo.geneontology.org/amigo/term/GO:0042255	MCAT DHX37 EIF2A
0.0719284865598638	4	360	129211111111111	GO:0042254 Ribosome biogenesis	https://amigo.geneontology.org/amigo/term/GO:0042254	DHX37 MCAT ERCC2 EIF2A
0.0719284865598638	3	129	270441860465116	GO:0042274 Ribosomal small subunit biogenesis	https://amigo.geneontology.org/amigo/term/GO:0042274	DHX37 MCAT ERCC2
0.0782819943854192	2	43	540883720930233	GO:0000462 Maturation of ssu-rrna from tricistronic rrna transcript (ssu-rrna 5.8s rrna lsu-rrna)	https://amigo.geneontology.org/amigo/term/GO:0000462	DHX37 ERCC2
0.0782819943854192	10	3920	296658163265306	GO:0006996 Organelle organization	https://amigo.geneontology.org/amigo/term/GO:0006996	FHOD3 MYO7A MCAT DHX37 ERCC2 TDRD9 TPP1 PARP1 EIF2A RFC1
0.0782819943854192	5	800	7268125	GO:0030855 Epithelial cell differentiation	https://amigo.geneontology.org/amigo/term/GO:0030855	GATA1 ERCC2 MYO7A TPP1 DMBT1
0.0782819943854192	2	44	528590909090909	GO:0048821 Erythrocyte development	https://amigo.geneontology.org/amigo/term/GO:0048821	ERCC2 GATA1
0.0782819943854192	4	466	998197424892704	GO:0140694 Non-membrane-bounded organelle assembly	https://amigo.geneontology.org/amigo/term/GO:0140694	FHOD3 MCAT DHX37 EIF2A
0.0951155336112542	4	533	872720450281426	GO:0022613 Ribonucleoprotein complex biogenesis	https://amigo.geneontology.org/amigo/term/GO:0022613	DHX37 MCAT ERCC2 EIF2A
0.0951155336112542	2	56	415321428571429	GO:0050885 Neuromuscular process controlling balance	https://amigo.geneontology.org/amigo/term/GO:0050885	TPP1 MYO7A
0.0951155336112542	2	57	408035087719298	GO:1990928 Response to amino acid starvation	https://amigo.geneontology.org/amigo/term/GO:1990928	NPRL2 EIF2A
0.102811722312268	2	145	16.04	GO:0000018 Regulation of dna recombination	https://amigo.geneontology.org/amigo/term/GO:0000018	ERCC2 PARP1
0.102811722312268	1	7	166128571428571	GO:0000019 Regulation of mitotic recombination	https://amigo.geneontology.org/amigo/term/GO:0000019	ERCC2
0.102811722312268	3	419	832625298329356	GO:0001701 In utero embryonic development	https://amigo.geneontology.org/amigo/term/GO:0001701	HM13 GATA1 ERCC2
0.102811722312268	1	10	116.29	GO:0006283 Transcription-coupled nucleotide-excision repair	https://amigo.geneontology.org/amigo/term/GO:0006283	ERCC2
0.102811722312268	2	144	161513888888889	GO:0006354 Dna-templated transcription elongation	https://amigo.geneontology.org/amigo/term/GO:0006354	PARP1 ERCC2
0.102811722312268	1	7	166128571428571	GO:0006362 Transcription elongation by rna polymerase i	https://amigo.geneontology.org/amigo/term/GO:0006362	ERCC2
0.102811722312268	6	1787	390453273642977	GO:0006508 Proteolysis	https://amigo.geneontology.org/amigo/term/GO:0006508	HM13 PSMD3 UBC WDR26 TPP1 PARP1
0.102811722312268	9	4545	230277227722772	GO:0006950 Response to stress	https://amigo.geneontology.org/amigo/term/GO:0006950	NPRL2 PARP1 DMBT1 ERCC2 RFC1 GATA1 EIF2A DGKE HM13
0.102811722312268	3	438	796506849315069	GO:0006979 Response to oxidative stress	https://amigo.geneontology.org/amigo/term/GO:0006979	ERCC2 PARP1 HM13
0.102811722312268	2	117	198786324786325	GO:0007040 Lysosome organization	https://amigo.geneontology.org/amigo/term/GO:0007040	MYO7A TPP1
0.102811722312268	2	156	149089743589744	GO:0008584 Male gonad development	https://amigo.geneontology.org/amigo/term/GO:0008584	DHX37 GATA1
0.102811722312268	7	2888	281866343490305	GO:0009056 Catabolic process	https://amigo.geneontology.org/amigo/term/GO:0009056	PSMD3 NPRL2 UBC WDR26 TPP1 HM13 MCAT
0.102811722312268	2	161	144459627329193	GO:0009411 Response to uv	https://amigo.geneontology.org/amigo/term/GO:0009411	ERCC2 PARP1
0.102811722312268	7	2165	375995381062356	GO:0009888 Tissue development	https://amigo.geneontology.org/amigo/term/GO:0009888	FHOD3 GATA1 ERCC2 MYO7A TPP1 PARP1 DMBT1
0.102811722312268	1	3	387633333333333	GO:0010724 Regulation of definitive erythrocyte differentiation	https://amigo.geneontology.org/amigo/term/GO:0010724	GATA1
0.102811722312268	2	78	298179487179487	GO:0010833 Telomere maintenance via telomere lengthening	https://amigo.geneontology.org/amigo/term/GO:0010833	PARP1 RFC1
0.102811722312268	2	142	163788732394366	GO:0010927 Cellular component assembly involved in morphogenesis	https://amigo.geneontology.org/amigo/term/GO:0010927	FHOD3 ERCC2
0.102811722312268	3	488	714897540983607	GO:0030099 Myeloid cell differentiation	https://amigo.geneontology.org/amigo/term/GO:0030099	GATA1 ERCC2 PARP1
0.102811722312268	5	1153	50429314830876	GO:0030163 Protein catabolic process	https://amigo.geneontology.org/amigo/term/GO:0030163	PSMD3 UBC WDR26 TPP1 HM13
0.102811722312268	2	160	1453625	GO:0030168 Platelet activation	https://amigo.geneontology.org/amigo/term/GO:0030168	GATA1 DGKE
0.102811722312268	2	150	155053333333333	GO:0030218 Erythrocyte differentiation	https://amigo.geneontology.org/amigo/term/GO:0030218	GATA1 ERCC2
0.102811722312268	1	7	166128571428571	GO:0030222 Eosinophil differentiation	https://amigo.geneontology.org/amigo/term/GO:0030222	GATA1
0.102811722312268	2	140	166128571428571	GO:0030282 Bone mineralization	https://amigo.geneontology.org/amigo/term/GO:0030282	GATA1 ERCC2
0.102811722312268	2	62	375129032258065	GO:0030490 Maturation of ssu-rrna	https://amigo.geneontology.org/amigo/term/GO:0030490	DHX37 ERCC2
0.102811722312268	1	4	290725	GO:0030592 Dna adp-ribosylation	https://amigo.geneontology.org/amigo/term/GO:0030592	PARP1
0.102811722312268	1	5	232.58	GO:0030809 Negative regulation of nucleotide biosynthetic process	https://amigo.geneontology.org/amigo/term/GO:0030809	PARP1
0.102811722312268	1	8	1453625	GO:0032289 Central nervous system myelin formation	https://amigo.geneontology.org/amigo/term/GO:0032289	ERCC2
0.102811722312268	2	142	163788732394366	GO:0032989 Cellular anatomical entity morphogenesis	https://amigo.geneontology.org/amigo/term/GO:0032989	FHOD3 ERCC2
0.102811722312268	1	10	116.29	GO:0033148 Positive regulation of intracellular estrogen receptor signaling pathway	https://amigo.geneontology.org/amigo/term/GO:0033148	PARP1
0.102811722312268	6	2047	34085979482169	GO:0033554 Cellular response to stress	https://amigo.geneontology.org/amigo/term/GO:0033554	NPRL2 PARP1 ERCC2 RFC1 EIF2A HM13
0.102811722312268	2	162	143567901234568	GO:0034101 Erythrocyte homeostasis	https://amigo.geneontology.org/amigo/term/GO:0034101	GATA1 ERCC2
0.102811722312268	2	143	162643356643357	GO:0034502 Protein localization to chromosome	https://amigo.geneontology.org/amigo/term/GO:0034502	PARP1 TPP1
0.102811722312268	2	66	352393939393939	GO:0035315 Hair cell differentiation	https://amigo.geneontology.org/amigo/term/GO:0035315	ERCC2 MYO7A
0.102811722312268	1	10	116.29	GO:0036446 Myofibroblast differentiation	https://amigo.geneontology.org/amigo/term/GO:0036446	PARP1
0.102811722312268	1	9	129211111111111	GO:0040016 Embryonic cleavage	https://amigo.geneontology.org/amigo/term/GO:0040016	ERCC2
0.102811722312268	1	6	193816666666667	GO:0042748 Circadian sleep/wake cycle non-rem sleep	https://amigo.geneontology.org/amigo/term/GO:0042748	PARP1
0.102811722312268	1	5	232.58	GO:0043152 Induction of bacterial agglutination	https://amigo.geneontology.org/amigo/term/GO:0043152	DMBT1
0.102811722312268	1	8	1453625	GO:0043504 Mitochondrial dna repair	https://amigo.geneontology.org/amigo/term/GO:0043504	PARP1
0.102811722312268	1	5	232.58	GO:0045188 Regulation of circadian sleep/wake cycle non-rem sleep	https://amigo.geneontology.org/amigo/term/GO:0045188	PARP1
0.102811722312268	2	79	294405063291139	GO:0045911 Positive regulation of dna recombination	https://amigo.geneontology.org/amigo/term/GO:0045911	ERCC2 PARP1
0.102811722312268	2	157	148140127388535	GO:0046546 Development of primary male sexual characteristics	https://amigo.geneontology.org/amigo/term/GO:0046546	DHX37 GATA1
0.102811722312268	3	487	716365503080082	GO:0048568 Embryonic organ development	https://amigo.geneontology.org/amigo/term/GO:0048568	GATA1 ERCC2 MYO7A
0.102811722312268	1	8	1453625	GO:0050957 Equilibrioception	https://amigo.geneontology.org/amigo/term/GO:0050957	MYO7A
0.102811722312268	4	896	519151785714286	GO:0051603 Proteolysis involved in protein catabolic process	https://amigo.geneontology.org/amigo/term/GO:0051603	PSMD3 UBC WDR26 HM13
0.102811722312268	1	9	129211111111111	GO:0051901 Positive regulation of mitochondrial depolarization	https://amigo.geneontology.org/amigo/term/GO:0051901	PARP1
0.102811722312268	1	9	129211111111111	GO:0060215 Primitive hemopoiesis	https://amigo.geneontology.org/amigo/term/GO:0060215	GATA1
0.102811722312268	1	5	232.58	GO:0060318 Definitive erythrocyte differentiation	https://amigo.geneontology.org/amigo/term/GO:0060318	GATA1
0.102811722312268	1	5	232.58	GO:0060319 Primitive erythrocyte differentiation	https://amigo.geneontology.org/amigo/term/GO:0060319	GATA1
0.102811722312268	5	1314	442503805175038	GO:0060429 Epithelium development	https://amigo.geneontology.org/amigo/term/GO:0060429	GATA1 ERCC2 MYO7A TPP1 DMBT1
0.102811722312268	1	7	166128571428571	GO:0060545 Positive regulation of necroptotic process	https://amigo.geneontology.org/amigo/term/GO:0060545	PARP1
0.102811722312268	2	98	237326530612245	GO:0061515 Myeloid cell development	https://amigo.geneontology.org/amigo/term/GO:0061515	ERCC2 GATA1
0.102811722312268	1	9	129211111111111	GO:0062100 Positive regulation of programmed necrotic cell death	https://amigo.geneontology.org/amigo/term/GO:0062100	PARP1
0.102811722312268	1	8	1453625	GO:0070212 Protein poly-adp-ribosylation	https://amigo.geneontology.org/amigo/term/GO:0070212	PARP1
0.102811722312268	5	1105	526199095022624	GO:0070925 Organelle assembly	https://amigo.geneontology.org/amigo/term/GO:0070925	FHOD3 MCAT DHX37 MYO7A EIF2A
0.102811722312268	1	10	116.29	GO:0071372 Cellular response to follicle-stimulating hormone stimulus	https://amigo.geneontology.org/amigo/term/GO:0071372	GATA1
0.102811722312268	1	4	290725	GO:0071932 Replication fork reversal	https://amigo.geneontology.org/amigo/term/GO:0071932	PARP1
0.102811722312268	2	117	198786324786325	GO:0080171 Lytic vacuole organization	https://amigo.geneontology.org/amigo/term/GO:0080171	MYO7A TPP1
0.102811722312268	1	6	193816666666667	GO:0141006 Pirna-mediated retrotransposon silencing by heterochromatin formation	https://amigo.geneontology.org/amigo/term/GO:0141006	TDRD9
0.102811722312268	1	5	232.58	GO:1900372 Negative regulation of purine nucleotide biosynthetic process	https://amigo.geneontology.org/amigo/term/GO:1900372	PARP1
0.102811722312268	1	3	387633333333333	GO:1903516 Regulation of single strand break repair	https://amigo.geneontology.org/amigo/term/GO:1903516	PARP1
0.102811722312268	1	4	290725	GO:1904178 Negative regulation of adipose tissue development	https://amigo.geneontology.org/amigo/term/GO:1904178	PARP1
0.102811722312268	1	6	193816666666667	GO:1904760 Regulation of myofibroblast differentiation	https://amigo.geneontology.org/amigo/term/GO:1904760	PARP1
0.102811722312268	1	3	387633333333333	GO:1905051 Regulation of base-excision repair	https://amigo.geneontology.org/amigo/term/GO:1905051	PARP1
0.102811722312268	1	9	129211111111111	GO:1905941 Positive regulation of gonad development	https://amigo.geneontology.org/amigo/term/GO:1905941	DHX37
0.102811722312268	1	4	290725	GO:1990966 Atp generation from poly-adp-d-ribose	https://amigo.geneontology.org/amigo/term/GO:1990966	PARP1
0.102811722312268	1	9	129211111111111	GO:2000018 Regulation of male gonad development	https://amigo.geneontology.org/amigo/term/GO:2000018	DHX37
0.102811722312268	1	8	1453625	GO:2000020 Positive regulation of male gonad development	https://amigo.geneontology.org/amigo/term/GO:2000020	DHX37
0.102811722312268	1	9	129211111111111	GO:2000678 Negative regulation of transcription regulatory region dna binding	https://amigo.geneontology.org/amigo/term/GO:2000678	GATA1
0.102811722312268	1	4	290725	GO:2001170 Negative regulation of atp biosynthetic process	https://amigo.geneontology.org/amigo/term/GO:2001170	PARP1
0.104795822825224	2	166	14010843373494	GO:0006261 Dna-templated dna replication	https://amigo.geneontology.org/amigo/term/GO:0006261	RFC1 PARP1
0.105568038705895	5	1581	367773561037318	GO:0009057 Macromolecule catabolic process	https://amigo.geneontology.org/amigo/term/GO:0009057	PSMD3 UBC WDR26 TPP1 HM13
0.105568038705895	1	11	105718181818182	GO:0009650 Uv protection	https://amigo.geneontology.org/amigo/term/GO:0009650	ERCC2
0.105568038705895	1	11	105718181818182	GO:0033145 Positive regulation of intracellular steroid hormone receptor signaling pathway	https://amigo.geneontology.org/amigo/term/GO:0033145	PARP1
0.105568038705895	1	11	105718181818182	GO:0046834 Lipid phosphorylation	https://amigo.geneontology.org/amigo/term/GO:0046834	DGKE
0.105568038705895	1	11	105718181818182	GO:1904181 Positive regulation of membrane depolarization	https://amigo.geneontology.org/amigo/term/GO:1904181	PARP1
0.112414059705044	1	13	894538461538462	GO:0006465 Signal peptide processing	https://amigo.geneontology.org/amigo/term/GO:0006465	HM13
0.112414059705044	1	13	894538461538462	GO:0033690 Positive regulation of osteoblast proliferation	https://amigo.geneontology.org/amigo/term/GO:0033690	GATA1
0.112414059705044	2	179	129932960893855	GO:0046661 Male sex differentiation	https://amigo.geneontology.org/amigo/term/GO:0046661	DHX37 GATA1
0.112414059705044	2	180	129211111111111	GO:0050905 Neuromuscular process	https://amigo.geneontology.org/amigo/term/GO:0050905	TPP1 MYO7A
0.112414059705044	1	13	894538461538462	GO:0061668 Mitochondrial ribosome assembly	https://amigo.geneontology.org/amigo/term/GO:0061668	MCAT
0.112414059705044	1	13	894538461538462	GO:0070213 Protein auto-adp-ribosylation	https://amigo.geneontology.org/amigo/term/GO:0070213	PARP1
0.112414059705044	1	13	894538461538462	GO:0141176 Gene silencing by pirna-directed dna methylation	https://amigo.geneontology.org/amigo/term/GO:0141176	TDRD9
0.112414059705044	1	13	894538461538462	GO:0141196 Retrotransposon silencing by pirna-directed dna methylation	https://amigo.geneontology.org/amigo/term/GO:0141196	TDRD9
0.112414059705044	1	13	894538461538462	GO:1905939 Regulation of gonad development	https://amigo.geneontology.org/amigo/term/GO:1905939	DHX37
0.11382308171531	2	190	122410526315789	GO:0000723 Telomere maintenance	https://amigo.geneontology.org/amigo/term/GO:0000723	PARP1 RFC1
0.11382308171531	9	4782	218864491844417	GO:0030154 Cell differentiation	https://amigo.geneontology.org/amigo/term/GO:0030154	GATA1 FHOD3 MYO7A ERCC2 PARP1 TDRD9 DMBT1 TPP1 SPRY3
0.11382308171531	1	14	830642857142857	GO:0032933 Srebp signaling pathway	https://amigo.geneontology.org/amigo/term/GO:0032933	EIF2A
0.11382308171531	1	14	830642857142857	GO:0048251 Elastic fiber assembly	https://amigo.geneontology.org/amigo/term/GO:0048251	THSD4
0.11382308171531	9	4783	218818733012754	GO:0048869 Cellular developmental process	https://amigo.geneontology.org/amigo/term/GO:0048869	GATA1 FHOD3 MYO7A ERCC2 PARP1 TDRD9 DMBT1 TPP1 SPRY3
0.11382308171531	1	14	830642857142857	GO:0160049 Negative regulation of cgas/sting signaling pathway	https://amigo.geneontology.org/amigo/term/GO:0160049	PARP1
0.114002399753261	4	1092	425970695970696	GO:0003006 Developmental process involved in reproduction	https://amigo.geneontology.org/amigo/term/GO:0003006	DHX37 GATA1 TDRD9 PARP1
0.114002399753261	2	197	118060913705584	GO:0031214 Biomineral tissue development	https://amigo.geneontology.org/amigo/term/GO:0031214	GATA1 ERCC2
0.114002399753261	1	15	775266666666667	GO:0048820 Hair follicle maturation	https://amigo.geneontology.org/amigo/term/GO:0048820	ERCC2
0.114002399753261	1	15	775266666666667	GO:0060009 Sertoli cell development	https://amigo.geneontology.org/amigo/term/GO:0060009	GATA1
0.114002399753261	1	15	775266666666667	GO:0071501 Cellular response to sterol depletion	https://amigo.geneontology.org/amigo/term/GO:0071501	EIF2A
0.114002399753261	1	15	775266666666667	GO:0150011 Regulation of neuron projection arborization	https://amigo.geneontology.org/amigo/term/GO:0150011	SPRY3
0.114002399753261	1	15	775266666666667	GO:1904177 Regulation of adipose tissue development	https://amigo.geneontology.org/amigo/term/GO:1904177	PARP1
0.115155438152202	1	16	7268125	GO:0000012 Single strand break repair	https://amigo.geneontology.org/amigo/term/GO:0000012	PARP1
0.115155438152202	2	206	112902912621359	GO:0002262 Myeloid cell homeostasis	https://amigo.geneontology.org/amigo/term/GO:0002262	GATA1 ERCC2
0.115155438152202	1	16	7268125	GO:0032354 Response to follicle-stimulating hormone	https://amigo.geneontology.org/amigo/term/GO:0032354	GATA1
0.115155438152202	1	16	7268125	GO:0043306 Positive regulation of mast cell degranulation	https://amigo.geneontology.org/amigo/term/GO:0043306	GATA1
0.115155438152202	1	16	7268125	GO:0045187 Regulation of circadian sleep/wake cycle sleep	https://amigo.geneontology.org/amigo/term/GO:0045187	PARP1
0.115155438152202	1	16	7268125	GO:0140966 Pirna-mediated heterochromatin formation	https://amigo.geneontology.org/amigo/term/GO:0140966	TDRD9
0.115465468449426	1	19	612052631578947	GO:0000028 Ribosomal small subunit assembly	https://amigo.geneontology.org/amigo/term/GO:0000028	MCAT
0.115465468449426	1	19	612052631578947	GO:0001845 Phagolysosome assembly	https://amigo.geneontology.org/amigo/term/GO:0001845	MYO7A
0.115465468449426	1	23	505608695652174	GO:0002093 Auditory receptor cell morphogenesis	https://amigo.geneontology.org/amigo/term/GO:0002093	MYO7A
0.115465468449426	2	271	858228782287823	GO:0002573 Myeloid leukocyte differentiation	https://amigo.geneontology.org/amigo/term/GO:0002573	GATA1 PARP1
0.115465468449426	3	681	512290748898678	GO:0006281 Dna repair	https://amigo.geneontology.org/amigo/term/GO:0006281	PARP1 ERCC2 RFC1
0.115465468449426	1	26	447269230769231	GO:0006312 Mitotic recombination	https://amigo.geneontology.org/amigo/term/GO:0006312	ERCC2
0.115465468449426	2	248	937822580645161	GO:0006364 Rrna processing	https://amigo.geneontology.org/amigo/term/GO:0006364	DHX37 ERCC2
0.115465468449426	1	18	646055555555556	GO:0006991 Response to sterol depletion	https://amigo.geneontology.org/amigo/term/GO:0006991	EIF2A
0.115465468449426	2	249	934056224899598	GO:0007033 Vacuole organization	https://amigo.geneontology.org/amigo/term/GO:0007033	MYO7A TPP1
0.115465468449426	1	26	447269230769231	GO:0007039 Protein catabolic process in the vacuole	https://amigo.geneontology.org/amigo/term/GO:0007039	TPP1
0.115465468449426	2	261	891111111111111	GO:0007596 Blood coagulation	https://amigo.geneontology.org/amigo/term/GO:0007596	GATA1 DGKE
0.115465468449426	2	268	867835820895522	GO:0007599 Hemostasis	https://amigo.geneontology.org/amigo/term/GO:0007599	GATA1 DGKE
0.115465468449426	2	244	953196721311475	GO:0008406 Gonad development	https://amigo.geneontology.org/amigo/term/GO:0008406	DHX37 GATA1
0.115465468449426	4	1197	388604845446951	GO:0009790 Embryo development	https://amigo.geneontology.org/amigo/term/GO:0009790	HM13 GATA1 ERCC2 MYO7A
0.115465468449426	3	706	494150141643059	GO:0009792 Embryo development ending in birth or egg hatching	https://amigo.geneontology.org/amigo/term/GO:0009792	HM13 GATA1 ERCC2
0.115465468449426	2	266	874360902255639	GO:0009913 Epidermal cell differentiation	https://amigo.geneontology.org/amigo/term/GO:0009913	ERCC2 MYO7A
0.115465468449426	3	624	559086538461538	GO:0010498 Proteasomal protein catabolic process	https://amigo.geneontology.org/amigo/term/GO:0010498	WDR26 HM13 PSMD3
0.115465468449426	1	26	447269230769231	GO:0010613 Positive regulation of cardiac muscle hypertrophy	https://amigo.geneontology.org/amigo/term/GO:0010613	PARP1
0.115465468449426	1	27	430703703703704	GO:0014742 Positive regulation of muscle hypertrophy	https://amigo.geneontology.org/amigo/term/GO:0014742	PARP1
0.115465468449426	2	262	887709923664122	GO:0016485 Protein processing	https://amigo.geneontology.org/amigo/term/GO:0016485	HM13 PARP1
0.115465468449426	1	27	430703703703704	GO:0016540 Protein autoprocessing	https://amigo.geneontology.org/amigo/term/GO:0016540	PARP1
0.115465468449426	1	27	430703703703704	GO:0022010 Central nervous system myelination	https://amigo.geneontology.org/amigo/term/GO:0022010	ERCC2
0.115465468449426	1	21	553761904761905	GO:0022410 Circadian sleep/wake cycle process	https://amigo.geneontology.org/amigo/term/GO:0022410	PARP1
0.115465468449426	7	3468	234726066897347	GO:0022607 Cellular component assembly	https://amigo.geneontology.org/amigo/term/GO:0022607	FHOD3 MCAT DHX37 ERCC2 MYO7A THSD4 EIF2A
0.115465468449426	1	24	484541666666667	GO:0023019 Signal transduction involved in regulation of gene expression	https://amigo.geneontology.org/amigo/term/GO:0023019	PARP1
0.115465468449426	2	217	107179723502304	GO:0030258 Lipid modification	https://amigo.geneontology.org/amigo/term/GO:0030258	DGKE MCAT
0.115465468449426	1	25	46516	GO:0030431 Sleep	https://amigo.geneontology.org/amigo/term/GO:0030431	PARP1
0.115465468449426	1	25	46516	GO:0030502 Negative regulation of bone mineralization	https://amigo.geneontology.org/amigo/term/GO:0030502	GATA1
0.115465468449426	1	22	528590909090909	GO:0030808 Regulation of nucleotide biosynthetic process	https://amigo.geneontology.org/amigo/term/GO:0030808	PARP1
0.115465468449426	1	23	505608695652174	GO:0031048 Regulatory ncrna-mediated heterochromatin formation	https://amigo.geneontology.org/amigo/term/GO:0031048	TDRD9
0.115465468449426	1	24	484541666666667	GO:0032042 Mitochondrial dna metabolic process	https://amigo.geneontology.org/amigo/term/GO:0032042	PARP1
0.115465468449426	2	223	104295964125561	GO:0032200 Telomere organization	https://amigo.geneontology.org/amigo/term/GO:0032200	PARP1 RFC1
0.115465468449426	1	24	484541666666667	GO:0032288 Myelin assembly	https://amigo.geneontology.org/amigo/term/GO:0032288	ERCC2
0.115465468449426	1	27	430703703703704	GO:0032291 Axon ensheathment in central nervous system	https://amigo.geneontology.org/amigo/term/GO:0032291	ERCC2
0.115465468449426	1	27	430703703703704	GO:0032785 Negative regulation of dna-templated transcription elongation	https://amigo.geneontology.org/amigo/term/GO:0032785	PARP1
0.115465468449426	1	20	58145	GO:0033033 Negative regulation of myeloid cell apoptotic process	https://amigo.geneontology.org/amigo/term/GO:0033033	GATA1
0.115465468449426	1	24	484541666666667	GO:0034244 Negative regulation of transcription elongation by rna polymerase ii	https://amigo.geneontology.org/amigo/term/GO:0034244	PARP1
0.115465468449426	1	21	553761904761905	GO:0034587 Pirna processing	https://amigo.geneontology.org/amigo/term/GO:0034587	TDRD9
0.115465468449426	2	274	848832116788321	GO:0034599 Cellular response to oxidative stress	https://amigo.geneontology.org/amigo/term/GO:0034599	PARP1 HM13
0.115465468449426	1	24	484541666666667	GO:0035162 Embryonic hemopoiesis	https://amigo.geneontology.org/amigo/term/GO:0035162	GATA1
0.115465468449426	1	26	447269230769231	GO:0036480 Neuron intrinsic apoptotic signaling pathway in response to oxidative stress	https://amigo.geneontology.org/amigo/term/GO:0036480	PARP1
0.115465468449426	1	19	612052631578947	GO:0040037 Negative regulation of fibroblast growth factor receptor signaling pathway	https://amigo.geneontology.org/amigo/term/GO:0040037	SPRY3
0.115465468449426	2	232	10025	GO:0042594 Response to starvation	https://amigo.geneontology.org/amigo/term/GO:0042594	NPRL2 EIF2A
0.115465468449426	1	24	484541666666667	GO:0042745 Circadian sleep/wake cycle	https://amigo.geneontology.org/amigo/term/GO:0042745	PARP1
0.115465468449426	1	20	58145	GO:0042749 Regulation of circadian sleep/wake cycle	https://amigo.geneontology.org/amigo/term/GO:0042749	PARP1
0.115465468449426	1	25	46516	GO:0042790 Nucleolar large rrna transcription by rna polymerase i	https://amigo.geneontology.org/amigo/term/GO:0042790	ERCC2
0.115465468449426	3	685	509299270072993	GO:0043009 Chordate embryonic development	https://amigo.geneontology.org/amigo/term/GO:0043009	HM13 GATA1 ERCC2
0.115465468449426	1	20	58145	GO:0043171 Peptide catabolic process	https://amigo.geneontology.org/amigo/term/GO:0043171	TPP1
0.115465468449426	1	22	528590909090909	GO:0043249 Erythrocyte maturation	https://amigo.geneontology.org/amigo/term/GO:0043249	ERCC2
0.115465468449426	2	249	934056224899598	GO:0045137 Development of primary sexual characteristics	https://amigo.geneontology.org/amigo/term/GO:0045137	DHX37 GATA1
0.115465468449426	1	27	430703703703704	GO:0046339 Diacylglycerol metabolic process	https://amigo.geneontology.org/amigo/term/GO:0046339	DGKE
0.115465468449426	1	27	430703703703704	GO:0046580 Negative regulation of ras protein signal transduction	https://amigo.geneontology.org/amigo/term/GO:0046580	SPRY3
0.115465468449426	1	26	447269230769231	GO:0046697 Decidualization	https://amigo.geneontology.org/amigo/term/GO:0046697	PARP1
0.115465468449426	7	3229	252099721275937	GO:0048513 Animal organ development	https://amigo.geneontology.org/amigo/term/GO:0048513	FHOD3 MYO7A SPRY3 DHX37 GATA1 ERCC2 PARP1
0.115465468449426	1	18	646055555555556	GO:0050802 Circadian sleep/wake cycle sleep	https://amigo.geneontology.org/amigo/term/GO:0050802	PARP1
0.115465468449426	2	268	867835820895522	GO:0050817 Coagulation	https://amigo.geneontology.org/amigo/term/GO:0050817	GATA1 DGKE
0.115465468449426	3	706	494150141643059	GO:0051276 Chromosome organization	https://amigo.geneontology.org/amigo/term/GO:0051276	ERCC2 PARP1 RFC1
0.115465468449426	1	26	447269230769231	GO:0051875 Pigment granule localization	https://amigo.geneontology.org/amigo/term/GO:0051875	MYO7A
0.115465468449426	1	27	430703703703704	GO:0051882 Mitochondrial depolarization	https://amigo.geneontology.org/amigo/term/GO:0051882	PARP1
0.115465468449426	1	21	553761904761905	GO:0051900 Regulation of mitochondrial depolarization	https://amigo.geneontology.org/amigo/term/GO:0051900	PARP1
0.115465468449426	1	23	505608695652174	GO:0051904 Pigment granule transport	https://amigo.geneontology.org/amigo/term/GO:0051904	MYO7A
0.115465468449426	1	24	484541666666667	GO:0051905 Establishment of pigment granule localization	https://amigo.geneontology.org/amigo/term/GO:0051905	MYO7A
0.115465468449426	1	19	612052631578947	GO:0055003 Cardiac myofibril assembly	https://amigo.geneontology.org/amigo/term/GO:0055003	FHOD3
0.115465468449426	1	22	528590909090909	GO:0060008 Sertoli cell differentiation	https://amigo.geneontology.org/amigo/term/GO:0060008	GATA1
0.115465468449426	1	20	58145	GO:0060088 Auditory receptor cell stereocilium organization	https://amigo.geneontology.org/amigo/term/GO:0060088	MYO7A
0.115465468449426	1	21	553761904761905	GO:0060216 Definitive hemopoiesis	https://amigo.geneontology.org/amigo/term/GO:0060216	GATA1
0.115465468449426	1	23	505608695652174	GO:0071294 Cellular response to zinc ion	https://amigo.geneontology.org/amigo/term/GO:0071294	PARP1
0.115465468449426	1	18	646055555555556	GO:0071371 Cellular response to gonadotropin stimulus	https://amigo.geneontology.org/amigo/term/GO:0071371	GATA1
0.115465468449426	3	675	516844444444444	GO:0097190 Apoptotic signaling pathway	https://amigo.geneontology.org/amigo/term/GO:0097190	ERCC2 PARP1 GATA1
0.115465468449426	1	22	528590909090909	GO:0140896 Cgas/sting signaling pathway	https://amigo.geneontology.org/amigo/term/GO:0140896	PARP1
0.115465468449426	1	19	612052631578947	GO:0141005 Retrotransposon silencing by heterochromatin formation	https://amigo.geneontology.org/amigo/term/GO:0141005	TDRD9
0.115465468449426	1	22	528590909090909	GO:1900371 Regulation of purine nucleotide biosynthetic process	https://amigo.geneontology.org/amigo/term/GO:1900371	PARP1
0.115465468449426	1	20	58145	GO:1903376 Regulation of oxidative stress-induced neuron intrinsic apoptotic signaling pathway	https://amigo.geneontology.org/amigo/term/GO:1903376	PARP1
0.115465468449426	1	25	46516	GO:1903579 Negative regulation of atp metabolic process	https://amigo.geneontology.org/amigo/term/GO:1903579	PARP1
0.115465468449426	1	19	612052631578947	GO:1904044 Response to aldosterone	https://amigo.geneontology.org/amigo/term/GO:1904044	PARP1
0.115465468449426	1	22	528590909090909	GO:1905146 Lysosomal protein catabolic process	https://amigo.geneontology.org/amigo/term/GO:1905146	TPP1
0.115465468449426	1	18	646055555555556	GO:2001169 Regulation of atp biosynthetic process	https://amigo.geneontology.org/amigo/term/GO:2001169	PARP1
0.116047714281287	2	277	839638989169675	GO:0001894 Tissue homeostasis	https://amigo.geneontology.org/amigo/term/GO:0001894	GATA1 TPP1
0.116047714281287	1	28	415321428571429	GO:0007141 Male meiosis i	https://amigo.geneontology.org/amigo/term/GO:0007141	TDRD9
0.116047714281287	1	28	415321428571429	GO:0034698 Response to gonadotropin	https://amigo.geneontology.org/amigo/term/GO:0034698	GATA1
0.116047714281287	2	278	836618705035971	GO:0060249 Anatomical structure homeostasis	https://amigo.geneontology.org/amigo/term/GO:0060249	GATA1 TPP1
0.116047714281287	1	28	415321428571429	GO:0060544 Regulation of necroptotic process	https://amigo.geneontology.org/amigo/term/GO:0060544	PARP1
0.116047714281287	1	28	415321428571429	GO:1900543 Negative regulation of purine nucleotide metabolic process	https://amigo.geneontology.org/amigo/term/GO:1900543	PARP1
0.116789129341913	3	736	474008152173913	GO:0019941 Modification-dependent protein catabolic process	https://amigo.geneontology.org/amigo/term/GO:0019941	PSMD3 UBC WDR26
0.117752410429199	3	741	47080971659919	GO:0043632 Modification-dependent macromolecule catabolic process	https://amigo.geneontology.org/amigo/term/GO:0043632	PSMD3 UBC WDR26
0.117752410429199	1	29	40.1	GO:0045980 Negative regulation of nucleotide metabolic process	https://amigo.geneontology.org/amigo/term/GO:0045980	PARP1
0.117752410429199	1	29	40.1	GO:0070198 Protein localization to chromosome telomeric region	https://amigo.geneontology.org/amigo/term/GO:0070198	TPP1
0.118807812301894	1	30	387633333333333	GO:0030970 Retrograde protein transport er to cytosol	https://amigo.geneontology.org/amigo/term/GO:0030970	HM13
0.118807812301894	1	30	387633333333333	GO:0033688 Regulation of osteoblast proliferation	https://amigo.geneontology.org/amigo/term/GO:0033688	GATA1
0.118807812301894	1	30	387633333333333	GO:0043392 Negative regulation of dna binding	https://amigo.geneontology.org/amigo/term/GO:0043392	GATA1
0.118807812301894	3	750	46516	GO:1902532 Negative regulation of intracellular signal transduction	https://amigo.geneontology.org/amigo/term/GO:1902532	NPRL2 SPRY3 PARP1
0.118807812301894	1	30	387633333333333	GO:1903513 Endoplasmic reticulum to cytosol transport	https://amigo.geneontology.org/amigo/term/GO:1903513	HM13
0.119266006548504	2	292	796506849315069	GO:0016072 Rrna metabolic process	https://amigo.geneontology.org/amigo/term/GO:0016072	DHX37 ERCC2
0.12038059399327	1	31	375129032258065	GO:0030220 Platelet formation	https://amigo.geneontology.org/amigo/term/GO:0030220	GATA1
0.12038059399327	1	31	375129032258065	GO:0060117 Auditory receptor cell development	https://amigo.geneontology.org/amigo/term/GO:0060117	MYO7A
0.12038059399327	1	31	375129032258065	GO:0090382 Phagosome maturation	https://amigo.geneontology.org/amigo/term/GO:0090382	MYO7A
0.122609009444068	2	301	772691029900332	GO:0006260 Dna replication	https://amigo.geneontology.org/amigo/term/GO:0006260	RFC1 PARP1
0.122609009444068	1	32	36340625	GO:0043302 Positive regulation of leukocyte degranulation	https://amigo.geneontology.org/amigo/term/GO:0043302	GATA1
0.122609009444068	1	32	36340625	GO:0043304 Regulation of mast cell degranulation	https://amigo.geneontology.org/amigo/term/GO:0043304	GATA1
0.122780727354196	1	33	352393939393939	GO:0000002 Mitochondrial genome maintenance	https://amigo.geneontology.org/amigo/term/GO:0000002	PARP1
0.122780727354196	2	302	770132450331126	GO:0007548 Sex differentiation	https://amigo.geneontology.org/amigo/term/GO:0007548	DHX37 GATA1
0.122780727354196	1	33	352393939393939	GO:0033146 Regulation of intracellular estrogen receptor signaling pathway	https://amigo.geneontology.org/amigo/term/GO:0033146	PARP1
0.122780727354196	1	33	352393939393939	GO:0036344 Platelet morphogenesis	https://amigo.geneontology.org/amigo/term/GO:0036344	GATA1
0.122780727354196	1	33	352393939393939	GO:0062098 Regulation of programmed necrotic cell death	https://amigo.geneontology.org/amigo/term/GO:0062098	PARP1
0.122780727354196	1	33	352393939393939	GO:1904357 Negative regulation of telomere maintenance via telomere lengthening	https://amigo.geneontology.org/amigo/term/GO:1904357	PARP1
0.123627319013848	1	34	342029411764706	GO:0006304 Dna modification	https://amigo.geneontology.org/amigo/term/GO:0006304	PARP1
0.123627319013848	1	34	342029411764706	GO:0040036 Regulation of fibroblast growth factor receptor signaling pathway	https://amigo.geneontology.org/amigo/term/GO:0040036	SPRY3
0.123627319013848	1	34	342029411764706	GO:0070168 Negative regulation of biomineral tissue development	https://amigo.geneontology.org/amigo/term/GO:0070168	GATA1
0.123627319013848	1	34	342029411764706	GO:0071425 Hematopoietic stem cell proliferation	https://amigo.geneontology.org/amigo/term/GO:0071425	ERCC2
0.123627319013848	1	34	342029411764706	GO:2000677 Regulation of transcription regulatory region dna binding	https://amigo.geneontology.org/amigo/term/GO:2000677	GATA1
0.126085850601797	1	35	332257142857143	GO:0033687 Osteoblast proliferation	https://amigo.geneontology.org/amigo/term/GO:0033687	GATA1
0.126085850601797	1	35	332257142857143	GO:0140058 Neuron projection arborization	https://amigo.geneontology.org/amigo/term/GO:0140058	SPRY3
0.127322328039025	2	318	731383647798742	GO:0051054 Positive regulation of dna metabolic process	https://amigo.geneontology.org/amigo/term/GO:0051054	ERCC2 PARP1
0.128498368994826	1	36	323027777777778	GO:0001893 Maternal placenta development	https://amigo.geneontology.org/amigo/term/GO:0001893	PARP1
0.128585014184942	2	322	722298136645963	GO:0010563 Negative regulation of phosphorus metabolic process	https://amigo.geneontology.org/amigo/term/GO:0010563	NPRL2 PARP1
0.128585014184942	2	322	722298136645963	GO:0045936 Negative regulation of phosphate metabolic process	https://amigo.geneontology.org/amigo/term/GO:0045936	NPRL2 PARP1
0.128760316237048	2	323	720061919504644	GO:0048608 Reproductive structure development	https://amigo.geneontology.org/amigo/term/GO:0048608	DHX37 GATA1
0.129181105805636	1	37	314297297297297	GO:0008340 Determination of adult lifespan	https://amigo.geneontology.org/amigo/term/GO:0008340	ERCC2
0.129181105805636	1	37	314297297297297	GO:0060218 Hematopoietic stem cell differentiation	https://amigo.geneontology.org/amigo/term/GO:0060218	ERCC2
0.130016516137738	2	327	711253822629969	GO:0061458 Reproductive system development	https://amigo.geneontology.org/amigo/term/GO:0061458	DHX37 GATA1
0.130380216499904	1	38	306026315789474	GO:0010526 Retrotransposon silencing	https://amigo.geneontology.org/amigo/term/GO:0010526	TDRD9
0.130380216499904	1	38	306026315789474	GO:0045648 Positive regulation of erythrocyte differentiation	https://amigo.geneontology.org/amigo/term/GO:0045648	GATA1
0.130380216499904	1	38	306026315789474	GO:0048873 Homeostasis of number of cells within a tissue	https://amigo.geneontology.org/amigo/term/GO:0048873	GATA1
0.130890809569618	2	332	700542168674699	GO:0009416 Response to light stimulus	https://amigo.geneontology.org/amigo/term/GO:0009416	ERCC2 PARP1
0.130890809569618	7	3775	215637086092715	GO:0044085 Cellular component biogenesis	https://amigo.geneontology.org/amigo/term/GO:0044085	FHOD3 DHX37 MCAT ERCC2 MYO7A THSD4 EIF2A
0.132652951293622	4	1465	317515358361775	GO:0009968 Negative regulation of signal transduction	https://amigo.geneontology.org/amigo/term/GO:0009968	NPRL2 SPRY3 PARP1 GATA1
0.132652951293622	1	40	290725	GO:0032197 Retrotransposition	https://amigo.geneontology.org/amigo/term/GO:0032197	TDRD9
0.132652951293622	1	40	290725	GO:0042462 Eye photoreceptor cell development	https://amigo.geneontology.org/amigo/term/GO:0042462	MYO7A
0.132652951293622	1	40	290725	GO:0051385 Response to mineralocorticoid	https://amigo.geneontology.org/amigo/term/GO:0051385	PARP1
0.132652951293622	1	40	290725	GO:0060122 Inner ear receptor cell stereocilium organization	https://amigo.geneontology.org/amigo/term/GO:0060122	MYO7A
0.132652951293622	2	337	690148367952522	GO:0097193 Intrinsic apoptotic signaling pathway	https://amigo.geneontology.org/amigo/term/GO:0097193	ERCC2 PARP1
0.134611878107961	1	41	283634146341463	GO:0009303 Rrna transcription	https://amigo.geneontology.org/amigo/term/GO:0009303	ERCC2
0.134611878107961	1	41	283634146341463	GO:0010559 Regulation of glycoprotein biosynthetic process	https://amigo.geneontology.org/amigo/term/GO:0010559	GATA1
0.134611878107961	2	344	676104651162791	GO:0062197 Cellular response to chemical stress	https://amigo.geneontology.org/amigo/term/GO:0062197	PARP1 HM13
0.136388869852436	1	42	276880952380952	GO:0006654 Phosphatidic acid biosynthetic process	https://amigo.geneontology.org/amigo/term/GO:0006654	DGKE
0.136388869852436	1	42	276880952380952	GO:0032196 Transposition	https://amigo.geneontology.org/amigo/term/GO:0032196	TDRD9
0.137924345530117	1	43	270441860465116	GO:0030851 Granulocyte differentiation	https://amigo.geneontology.org/amigo/term/GO:0030851	GATA1
0.137924345530117	1	43	270441860465116	GO:0032205 Negative regulation of telomere maintenance	https://amigo.geneontology.org/amigo/term/GO:0032205	PARP1
0.137924345530117	1	43	270441860465116	GO:0033032 Regulation of myeloid cell apoptotic process	https://amigo.geneontology.org/amigo/term/GO:0033032	GATA1
0.139968033552761	1	44	264295454545455	GO:1902175 Regulation of oxidative stress-induced intrinsic apoptotic signaling pathway	https://amigo.geneontology.org/amigo/term/GO:1902175	PARP1
0.139968033552761	1	44	264295454545455	GO:1905168 Positive regulation of double-strand break repair via homologous recombination	https://amigo.geneontology.org/amigo/term/GO:1905168	PARP1
0.140412396826765	2	359	647855153203343	GO:0030198 Extracellular matrix organization	https://amigo.geneontology.org/amigo/term/GO:0030198	THSD4 ERCC2
0.140412396826765	2	359	647855153203343	GO:0048872 Homeostasis of number of cells	https://amigo.geneontology.org/amigo/term/GO:0048872	GATA1 ERCC2
0.140577878410704	2	360	646055555555556	GO:0043062 Extracellular structure organization	https://amigo.geneontology.org/amigo/term/GO:0043062	THSD4 ERCC2
0.140881024632452	1	45	258422222222222	GO:0030279 Negative regulation of ossification	https://amigo.geneontology.org/amigo/term/GO:0030279	GATA1
0.140909239789193	2	362	642486187845304	GO:0045229 External encapsulating structure organization	https://amigo.geneontology.org/amigo/term/GO:0045229	THSD4 ERCC2
0.141226781804904	6	3054	228467583497053	GO:0048468 Cell development	https://amigo.geneontology.org/amigo/term/GO:0048468	FHOD3 MYO7A GATA1 ERCC2 SPRY3 PARP1
0.141226781804904	3	886	393758465011287	GO:0048871 Multicellular organismal-level homeostasis	https://amigo.geneontology.org/amigo/term/GO:0048871	GATA1 ERCC2 TPP1
0.141226781804904	1	46	252804347826087	GO:0060391 Positive regulation of smad protein signal transduction	https://amigo.geneontology.org/amigo/term/GO:0060391	PARP1
0.141226781804904	1	46	252804347826087	GO:1903018 Regulation of glycoprotein metabolic process	https://amigo.geneontology.org/amigo/term/GO:1903018	GATA1
0.143153774855159	1	47	247425531914894	GO:0046473 Phosphatidic acid metabolic process	https://amigo.geneontology.org/amigo/term/GO:0046473	DGKE
0.143153774855159	1	47	247425531914894	GO:1904646 Cellular response to amyloid-beta	https://amigo.geneontology.org/amigo/term/GO:1904646	PARP1
0.143472846336676	2	371	626900269541779	GO:0006310 Dna recombination	https://amigo.geneontology.org/amigo/term/GO:0006310	ERCC2 PARP1
0.14373705940886	1	48	242270833333333	GO:0003254 Regulation of membrane depolarization	https://amigo.geneontology.org/amigo/term/GO:0003254	PARP1
0.14373705940886	1	48	242270833333333	GO:0006284 Base-excision repair	https://amigo.geneontology.org/amigo/term/GO:0006284	PARP1
0.14373705940886	1	50	23258	GO:0006984 Er-nucleus signaling pathway	https://amigo.geneontology.org/amigo/term/GO:0006984	EIF2A
0.14373705940886	1	50	23258	GO:0007622 Rhythmic behavior	https://amigo.geneontology.org/amigo/term/GO:0007622	PARP1
0.14373705940886	1	50	23258	GO:0010043 Response to zinc ion	https://amigo.geneontology.org/amigo/term/GO:0010043	PARP1
0.14373705940886	1	50	23258	GO:0014003 Oligodendrocyte development	https://amigo.geneontology.org/amigo/term/GO:0014003	ERCC2
0.14373705940886	1	50	23258	GO:0030866 Cortical actin cytoskeleton organization	https://amigo.geneontology.org/amigo/term/GO:0030866	FHOD3
0.14373705940886	1	51	228019607843137	GO:0031297 Replication fork processing	https://amigo.geneontology.org/amigo/term/GO:0031297	PARP1
0.14373705940886	1	49	237326530612245	GO:0032527 Protein exit from endoplasmic reticulum	https://amigo.geneontology.org/amigo/term/GO:0032527	HM13
0.14373705940886	1	50	23258	GO:0033028 Myeloid cell apoptotic process	https://amigo.geneontology.org/amigo/term/GO:0033028	GATA1
0.14373705940886	1	51	228019607843137	GO:0042491 Inner ear auditory receptor cell differentiation	https://amigo.geneontology.org/amigo/term/GO:0042491	MYO7A
0.14373705940886	1	48	242270833333333	GO:0048512 Circadian behavior	https://amigo.geneontology.org/amigo/term/GO:0048512	PARP1
0.14373705940886	1	49	237326530612245	GO:0070266 Necroptotic process	https://amigo.geneontology.org/amigo/term/GO:0070266	PARP1
0.14373705940886	1	51	228019607843137	GO:0071320 Cellular response to camp	https://amigo.geneontology.org/amigo/term/GO:0071320	GATA1
0.14373705940886	1	51	228019607843137	GO:0085029 Extracellular matrix assembly	https://amigo.geneontology.org/amigo/term/GO:0085029	THSD4
0.14373705940886	1	51	228019607843137	GO:0090102 Cochlea development	https://amigo.geneontology.org/amigo/term/GO:0090102	MYO7A
0.14373705940886	1	51	228019607843137	GO:1901099 Negative regulation of signal transduction in absence of ligand	https://amigo.geneontology.org/amigo/term/GO:1901099	GATA1
0.14373705940886	1	51	228019607843137	GO:1903307 Positive regulation of regulated secretory pathway	https://amigo.geneontology.org/amigo/term/GO:1903307	GATA1
0.14373705940886	1	50	23258	GO:1904262 Negative regulation of torc1 signaling	https://amigo.geneontology.org/amigo/term/GO:1904262	NPRL2
0.14373705940886	1	51	228019607843137	GO:2001240 Negative regulation of extrinsic apoptotic signaling pathway in absence of ligand	https://amigo.geneontology.org/amigo/term/GO:2001240	GATA1
0.145482078981254	1	52	223634615384615	GO:0045646 Regulation of erythrocyte differentiation	https://amigo.geneontology.org/amigo/term/GO:0045646	GATA1
0.145482078981254	1	52	223634615384615	GO:0048009 Insulin-like growth factor receptor signaling pathway	https://amigo.geneontology.org/amigo/term/GO:0048009	ERCC2
0.145665722711171	4	1595	291636363636364	GO:0010648 Negative regulation of cell communication	https://amigo.geneontology.org/amigo/term/GO:0010648	NPRL2 SPRY3 PARP1 GATA1
0.145665722711171	4	1594	291819322459222	GO:0023057 Negative regulation of signaling	https://amigo.geneontology.org/amigo/term/GO:0023057	NPRL2 SPRY3 PARP1 GATA1
0.146196100082088	1	53	219415094339623	GO:0045214 Sarcomere organization	https://amigo.geneontology.org/amigo/term/GO:0045214	FHOD3
0.146196100082088	1	53	219415094339623	GO:1990090 Cellular response to nerve growth factor stimulus	https://amigo.geneontology.org/amigo/term/GO:1990090	PARP1
0.147384952866949	1	54	215351851851852	GO:0010332 Response to gamma radiation	https://amigo.geneontology.org/amigo/term/GO:0010332	PARP1
0.147384952866949	1	54	215351851851852	GO:0010611 Regulation of cardiac muscle hypertrophy	https://amigo.geneontology.org/amigo/term/GO:0010611	PARP1
0.147384952866949	1	54	215351851851852	GO:0034198 Cellular response to amino acid starvation	https://amigo.geneontology.org/amigo/term/GO:0034198	NPRL2
0.148052625005909	1	55	211436363636364	GO:0042461 Photoreceptor cell development	https://amigo.geneontology.org/amigo/term/GO:0042461	MYO7A
0.148052625005909	1	55	211436363636364	GO:0043300 Regulation of leukocyte degranulation	https://amigo.geneontology.org/amigo/term/GO:0043300	GATA1
0.148052625005909	1	55	211436363636364	GO:0060119 Inner ear receptor cell development	https://amigo.geneontology.org/amigo/term/GO:0060119	MYO7A
0.148052625005909	1	55	211436363636364	GO:1990089 Response to nerve growth factor	https://amigo.geneontology.org/amigo/term/GO:1990089	PARP1
0.148700599294896	1	56	207660714285714	GO:0001754 Eye photoreceptor cell differentiation	https://amigo.geneontology.org/amigo/term/GO:0001754	MYO7A
0.148700599294896	1	56	207660714285714	GO:0007140 Male meiotic nuclear division	https://amigo.geneontology.org/amigo/term/GO:0007140	TDRD9
0.148700599294896	1	56	207660714285714	GO:0030520 Estrogen receptor signaling pathway	https://amigo.geneontology.org/amigo/term/GO:0030520	PARP1
0.148700599294896	3	956	364926778242678	GO:0097435 Supramolecular fiber organization	https://amigo.geneontology.org/amigo/term/GO:0097435	FHOD3 MYO7A THSD4
0.150305655562103	1	57	204017543859649	GO:0006346 Dna methylation-dependent heterochromatin formation	https://amigo.geneontology.org/amigo/term/GO:0006346	TDRD9
0.150305655562103	1	57	204017543859649	GO:0014743 Regulation of muscle hypertrophy	https://amigo.geneontology.org/amigo/term/GO:0014743	PARP1
0.151396224117259	2	414	561787439613527	GO:0008544 Epidermis development	https://amigo.geneontology.org/amigo/term/GO:0008544	ERCC2 MYO7A
0.151396224117259	2	414	561787439613527	GO:0050878 Regulation of body fluid levels	https://amigo.geneontology.org/amigo/term/GO:0050878	GATA1 DGKE
0.151396224117259	1	58	20.05	GO:1904645 Response to amyloid-beta	https://amigo.geneontology.org/amigo/term/GO:1904645	PARP1
0.151492645341912	1	59	197101694915254	GO:0043303 Mast cell degranulation	https://amigo.geneontology.org/amigo/term/GO:0043303	GATA1
0.151492645341912	1	59	197101694915254	GO:0045005 Dna-templated dna replication maintenance of fidelity	https://amigo.geneontology.org/amigo/term/GO:0045005	PARP1
0.151492645341912	1	59	197101694915254	GO:0046578 Regulation of ras protein signal transduction	https://amigo.geneontology.org/amigo/term/GO:0046578	SPRY3
0.151492645341912	1	59	197101694915254	GO:0060135 Maternal process involved in female pregnancy	https://amigo.geneontology.org/amigo/term/GO:0060135	PARP1
0.151492645341912	2	418	556411483253589	GO:2001233 Regulation of apoptotic signaling pathway	https://amigo.geneontology.org/amigo/term/GO:2001233	PARP1 GATA1
0.152540388826638	1	60	193816666666667	GO:0051058 Negative regulation of small gtpase mediated signal transduction	https://amigo.geneontology.org/amigo/term/GO:0051058	SPRY3
0.152540388826638	1	60	193816666666667	GO:0060612 Adipose tissue development	https://amigo.geneontology.org/amigo/term/GO:0060612	PARP1
0.152540388826638	1	60	193816666666667	GO:1904356 Regulation of telomere maintenance via telomere lengthening	https://amigo.geneontology.org/amigo/term/GO:1904356	PARP1
0.153088073565659	1	61	190639344262295	GO:0002279 Mast cell activation involved in immune response	https://amigo.geneontology.org/amigo/term/GO:0002279	GATA1
0.153088073565659	1	61	190639344262295	GO:0032786 Positive regulation of dna-templated transcription elongation	https://amigo.geneontology.org/amigo/term/GO:0032786	PARP1
0.153088073565659	1	61	190639344262295	GO:0097300 Programmed necrotic cell death	https://amigo.geneontology.org/amigo/term/GO:0097300	PARP1
0.153088073565659	1	61	190639344262295	GO:2001239 Regulation of extrinsic apoptotic signaling pathway in absence of ligand	https://amigo.geneontology.org/amigo/term/GO:2001239	GATA1
0.155051541015161	1	62	187564516129032	GO:0002448 Mast cell mediated immunity	https://amigo.geneontology.org/amigo/term/GO:0002448	GATA1
0.155268114893839	3	999	349219219219219	GO:0000122 Negative regulation of transcription by rna polymerase ii	https://amigo.geneontology.org/amigo/term/GO:0000122	GATA1 PARP1 RFC1
0.155933927345577	3	1002	348173652694611	GO:0051093 Negative regulation of developmental process	https://amigo.geneontology.org/amigo/term/GO:0051093	GATA1 PARP1 SPRY3
0.157466001181294	1	65	178907692307692	GO:0007004 Telomere maintenance via telomerase	https://amigo.geneontology.org/amigo/term/GO:0007004	RFC1
0.157466001181294	1	65	178907692307692	GO:0008631 Intrinsic apoptotic signaling pathway in response to oxidative stress	https://amigo.geneontology.org/amigo/term/GO:0008631	PARP1
0.157466001181294	4	1701	273462669018225	GO:0022414 Reproductive process	https://amigo.geneontology.org/amigo/term/GO:0022414	DHX37 GATA1 TDRD9 PARP1
0.157466001181294	1	65	178907692307692	GO:0030225 Macrophage differentiation	https://amigo.geneontology.org/amigo/term/GO:0030225	PARP1
0.157466001181294	1	65	178907692307692	GO:0030865 Cortical cytoskeleton organization	https://amigo.geneontology.org/amigo/term/GO:0030865	FHOD3
0.157466001181294	1	65	178907692307692	GO:0033059 Cellular pigmentation	https://amigo.geneontology.org/amigo/term/GO:0033059	MYO7A
0.157466001181294	1	64	181703125	GO:0039532 Negative regulation of cytoplasmic pattern recognition receptor signaling pathway	https://amigo.geneontology.org/amigo/term/GO:0039532	PARP1
0.157466001181294	1	65	178907692307692	GO:0071168 Protein localization to chromatin	https://amigo.geneontology.org/amigo/term/GO:0071168	PARP1
0.15773874753741	1	66	17619696969697	GO:0002886 Regulation of myeloid leukocyte mediated immunity	https://amigo.geneontology.org/amigo/term/GO:0002886	GATA1
0.15773874753741	3	1023	341026392961877	GO:0006974 Dna damage response	https://amigo.geneontology.org/amigo/term/GO:0006974	PARP1 ERCC2 RFC1
0.15773874753741	3	1021	341694417238002	GO:0019220 Regulation of phosphate metabolic process	https://amigo.geneontology.org/amigo/term/GO:0019220	NPRL2 GATA1 PARP1
0.15773874753741	3	1022	341360078277886	GO:0051174 Regulation of phosphorus metabolic process	https://amigo.geneontology.org/amigo/term/GO:0051174	NPRL2 GATA1 PARP1
0.15773874753741	1	66	17619696969697	GO:0097028 Dendritic cell differentiation	https://amigo.geneontology.org/amigo/term/GO:0097028	GATA1
0.158830619990375	3	1028	339367704280156	GO:0007167 Enzyme-linked receptor protein signaling pathway	https://amigo.geneontology.org/amigo/term/GO:0007167	SPRY3 ERCC2 PARP1
0.158830619990375	1	67	173567164179104	GO:0140719 Constitutive heterochromatin formation	https://amigo.geneontology.org/amigo/term/GO:0140719	TDRD9
0.160661919592944	1	68	171014705882353	GO:0031100 Animal organ regeneration	https://amigo.geneontology.org/amigo/term/GO:0031100	GATA1
0.161063618812401	3	1039	335774783445621	GO:0000902 Cell morphogenesis	https://amigo.geneontology.org/amigo/term/GO:0000902	GATA1 MYO7A SPRY3
0.161063618812401	2	454	512290748898678	GO:0001503 Ossification	https://amigo.geneontology.org/amigo/term/GO:0001503	GATA1 ERCC2
0.161063618812401	1	69	168536231884058	GO:0006278 Rna-templated dna biosynthetic process	https://amigo.geneontology.org/amigo/term/GO:0006278	RFC1
0.161063618812401	1	69	168536231884058	GO:0006518 Peptide metabolic process	https://amigo.geneontology.org/amigo/term/GO:0006518	TPP1
0.162387506657032	1	70	166128571428571	GO:0033619 Membrane protein proteolysis	https://amigo.geneontology.org/amigo/term/GO:0033619	HM13
0.162387506657032	1	70	166128571428571	GO:0070373 Negative regulation of erk1 and erk2 cascade	https://amigo.geneontology.org/amigo/term/GO:0070373	SPRY3
0.162912952292337	2	461	504511930585683	GO:0009314 Response to radiation	https://amigo.geneontology.org/amigo/term/GO:0009314	ERCC2 PARP1
0.163120183105244	1	72	161513888888889	GO:0030219 Megakaryocyte differentiation	https://amigo.geneontology.org/amigo/term/GO:0030219	GATA1
0.163120183105244	1	71	163788732394366	GO:0032007 Negative regulation of tor signaling	https://amigo.geneontology.org/amigo/term/GO:0032007	NPRL2
0.163120183105244	1	71	163788732394366	GO:0033143 Regulation of intracellular steroid hormone receptor signaling pathway	https://amigo.geneontology.org/amigo/term/GO:0033143	PARP1
0.163120183105244	1	72	161513888888889	GO:0045453 Bone resorption	https://amigo.geneontology.org/amigo/term/GO:0045453	TPP1
0.163120183105244	7	4287	189883368322836	GO:0048731 System development	https://amigo.geneontology.org/amigo/term/GO:0048731	FHOD3 TPP1 MYO7A DHX37 GATA1 ERCC2 SPRY3
0.163120183105244	1	72	161513888888889	GO:0060390 Regulation of smad protein signal transduction	https://amigo.geneontology.org/amigo/term/GO:0060390	PARP1
0.163120183105244	1	72	161513888888889	GO:0070918 Regulatory ncrna processing	https://amigo.geneontology.org/amigo/term/GO:0070918	TDRD9
0.164853016607019	1	73	159301369863014	GO:0060113 Inner ear receptor cell differentiation	https://amigo.geneontology.org/amigo/term/GO:0060113	MYO7A
0.165436953572711	3	1067	326963448922212	GO:0030097 Hemopoiesis	https://amigo.geneontology.org/amigo/term/GO:0030097	GATA1 ERCC2 PARP1
0.166107728790175	1	74	157148648648649	GO:0046530 Photoreceptor cell differentiation	https://amigo.geneontology.org/amigo/term/GO:0046530	MYO7A
0.167346685688687	1	75	155053333333333	GO:0019731 Antibacterial humoral response	https://amigo.geneontology.org/amigo/term/GO:0019731	DMBT1
0.167346685688687	1	75	155053333333333	GO:0045576 Mast cell activation	https://amigo.geneontology.org/amigo/term/GO:0045576	GATA1
0.167840978164353	2	481	483534303534304	GO:0042060 Wound healing	https://amigo.geneontology.org/amigo/term/GO:0042060	GATA1 DGKE
0.167840978164353	2	481	483534303534304	GO:0043161 Proteasome-mediated ubiquitin-dependent protein catabolic process	https://amigo.geneontology.org/amigo/term/GO:0043161	WDR26 PSMD3
0.167840978164353	1	76	153013157894737	GO:0051881 Regulation of mitochondrial membrane potential	https://amigo.geneontology.org/amigo/term/GO:0051881	PARP1
0.167840978164353	1	76	153013157894737	GO:1903578 Regulation of atp metabolic process	https://amigo.geneontology.org/amigo/term/GO:1903578	PARP1
0.169513571696436	3	1089	320358126721763	GO:0006259 Dna metabolic process	https://amigo.geneontology.org/amigo/term/GO:0006259	ERCC2 PARP1 RFC1
0.169513571696436	3	1088	320652573529412	GO:0006396 Rna processing	https://amigo.geneontology.org/amigo/term/GO:0006396	DHX37 ERCC2 TDRD9
0.170504492541852	1	78	149089743589744	GO:0006635 Fatty acid beta-oxidation	https://amigo.geneontology.org/amigo/term/GO:0006635	MCAT
0.171682339688046	1	79	14720253164557	GO:0032508 Dna duplex unwinding	https://amigo.geneontology.org/amigo/term/GO:0032508	ERCC2
0.171682339688046	1	79	14720253164557	GO:0043502 Regulation of muscle adaptation	https://amigo.geneontology.org/amigo/term/GO:0043502	PARP1
0.17331415423332	1	80	1453625	GO:0030239 Myofibril assembly	https://amigo.geneontology.org/amigo/term/GO:0030239	FHOD3
0.174463909660396	1	81	143567901234568	GO:0006360 Transcription by rna polymerase i	https://amigo.geneontology.org/amigo/term/GO:0006360	ERCC2
0.174463909660396	1	81	143567901234568	GO:0050795 Regulation of behavior	https://amigo.geneontology.org/amigo/term/GO:0050795	PARP1
0.176071677993495	1	82	141817073170732	GO:0051101 Regulation of dna binding	https://amigo.geneontology.org/amigo/term/GO:0051101	GATA1
0.176877261758119	1	83	14010843373494	GO:0003300 Cardiac muscle hypertrophy	https://amigo.geneontology.org/amigo/term/GO:0003300	PARP1
0.176877261758119	3	1121	31121320249777	GO:0007417 Central nervous system development	https://amigo.geneontology.org/amigo/term/GO:0007417	TPP1 ERCC2 DHX37
0.176877261758119	1	83	14010843373494	GO:0055013 Cardiac muscle cell development	https://amigo.geneontology.org/amigo/term/GO:0055013	FHOD3
0.177359450038321	1	84	138440476190476	GO:0008543 Fibroblast growth factor receptor signaling pathway	https://amigo.geneontology.org/amigo/term/GO:0008543	SPRY3
0.177359450038321	1	84	138440476190476	GO:0010569 Regulation of double-strand break repair via homologous recombination	https://amigo.geneontology.org/amigo/term/GO:0010569	PARP1
0.177359450038321	1	84	138440476190476	GO:0042490 Mechanoreceptor differentiation	https://amigo.geneontology.org/amigo/term/GO:0042490	MYO7A
0.177519704893459	1	85	136811764705882	GO:0032392 Dna geometric change	https://amigo.geneontology.org/amigo/term/GO:0032392	ERCC2
0.177519704893459	1	85	136811764705882	GO:0045921 Positive regulation of exocytosis	https://amigo.geneontology.org/amigo/term/GO:0045921	GATA1
0.177519704893459	2	510	456039215686275	GO:0051656 Establishment of organelle localization	https://amigo.geneontology.org/amigo/term/GO:0051656	GATA1 MYO7A
0.177519704893459	1	85	136811764705882	GO:0097192 Extrinsic apoptotic signaling pathway in absence of ligand	https://amigo.geneontology.org/amigo/term/GO:0097192	GATA1
0.178600392054031	1	86	135220930232558	GO:0014897 Striated muscle hypertrophy	https://amigo.geneontology.org/amigo/term/GO:0014897	PARP1
0.178600392054031	1	86	135220930232558	GO:1900542 Regulation of purine nucleotide metabolic process	https://amigo.geneontology.org/amigo/term/GO:1900542	PARP1
0.179668244672709	1	87	133666666666667	GO:0006140 Regulation of nucleotide metabolic process	https://amigo.geneontology.org/amigo/term/GO:0006140	PARP1
0.179668244672709	1	87	133666666666667	GO:0038034 Signal transduction in absence of ligand	https://amigo.geneontology.org/amigo/term/GO:0038034	GATA1
0.180258877749443	1	88	132147727272727	GO:0014896 Muscle hypertrophy	https://amigo.geneontology.org/amigo/term/GO:0014896	PARP1
0.180258877749443	4	1882	247162592986185	GO:0048585 Negative regulation of response to stimulus	https://amigo.geneontology.org/amigo/term/GO:0048585	NPRL2 SPRY3 PARP1 GATA1
0.180258877749443	1	88	132147727272727	GO:0051591 Response to camp	https://amigo.geneontology.org/amigo/term/GO:0051591	GATA1
0.181301365834973	1	89	130662921348315	GO:0055006 Cardiac cell development	https://amigo.geneontology.org/amigo/term/GO:0055006	FHOD3
0.181301365834973	1	89	130662921348315	GO:0060395 Smad protein signal transduction	https://amigo.geneontology.org/amigo/term/GO:0060395	PARP1
0.181697911815599	3	1155	302051948051948	GO:1901698 Response to nitrogen compound	https://amigo.geneontology.org/amigo/term/GO:1901698	PARP1 GATA1 HM13
0.184243254158729	2	531	438003766478343	GO:0031667 Response to nutrient levels	https://amigo.geneontology.org/amigo/term/GO:0031667	NPRL2 EIF2A
0.185289742543136	1	92	126402173913043	GO:0030500 Regulation of bone mineralization	https://amigo.geneontology.org/amigo/term/GO:0030500	GATA1
0.185289742543136	1	92	126402173913043	GO:0070527 Platelet aggregation	https://amigo.geneontology.org/amigo/term/GO:0070527	GATA1
0.185634445793917	1	93	125043010752688	GO:0009791 Post-embryonic development	https://amigo.geneontology.org/amigo/term/GO:0009791	ERCC2
0.185634445793917	1	93	125043010752688	GO:0034644 Cellular response to uv	https://amigo.geneontology.org/amigo/term/GO:0034644	PARP1
0.185634445793917	2	538	432304832713755	GO:0051052 Regulation of dna metabolic process	https://amigo.geneontology.org/amigo/term/GO:0051052	ERCC2 PARP1
0.185634445793917	1	93	125043010752688	GO:0072332 Intrinsic apoptotic signaling pathway by p53 class mediator	https://amigo.geneontology.org/amigo/term/GO:0072332	ERCC2
0.185870766408738	1	94	123712765957447	GO:0043299 Leukocyte degranulation	https://amigo.geneontology.org/amigo/term/GO:0043299	GATA1
0.185870766408738	1	94	123712765957447	GO:0071103 Dna conformation change	https://amigo.geneontology.org/amigo/term/GO:0071103	ERCC2
0.185870766408738	1	94	123712765957447	GO:2000243 Positive regulation of reproductive process	https://amigo.geneontology.org/amigo/term/GO:2000243	DHX37
0.185922183601216	1	95	122410526315789	GO:0006289 Nucleotide-excision repair	https://amigo.geneontology.org/amigo/term/GO:0006289	ERCC2
0.185922183601216	5	2748	211590247452693	GO:0031324 Negative regulation of cellular metabolic process	https://amigo.geneontology.org/amigo/term/GO:0031324	GATA1 NPRL2 PARP1 RFC1 TDRD9
0.185922183601216	1	95	122410526315789	GO:0032418 Lysosome localization	https://amigo.geneontology.org/amigo/term/GO:0032418	GATA1
0.185922183601216	1	95	122410526315789	GO:2000781 Positive regulation of double-strand break repair	https://amigo.geneontology.org/amigo/term/GO:2000781	PARP1
0.186882691188076	1	96	121135416666667	GO:0034243 Regulation of transcription elongation by rna polymerase ii	https://amigo.geneontology.org/amigo/term/GO:0034243	PARP1
0.186882691188076	1	96	121135416666667	GO:1990849 Vacuolar localization	https://amigo.geneontology.org/amigo/term/GO:1990849	GATA1
0.187375287035248	5	2764	210365412445731	GO:0007399 Nervous system development	https://amigo.geneontology.org/amigo/term/GO:0007399	TPP1 MYO7A ERCC2 SPRY3 DHX37
0.187375287035248	5	2767	210137332851464	GO:0008104 Protein localization	https://amigo.geneontology.org/amigo/term/GO:0008104	PARP1 MYO7A DMBT1 HM13 TPP1
0.187375287035248	1	97	119886597938144	GO:0051899 Membrane depolarization	https://amigo.geneontology.org/amigo/term/GO:0051899	PARP1
0.188314096680974	1	98	118663265306122	GO:0046849 Bone remodeling	https://amigo.geneontology.org/amigo/term/GO:0046849	TPP1
0.188314096680974	1	98	118663265306122	GO:1900182 Positive regulation of protein localization to nucleus	https://amigo.geneontology.org/amigo/term/GO:1900182	PARP1
0.188805597944449	5	2779	209229938826916	GO:0070727 Cellular macromolecule localization	https://amigo.geneontology.org/amigo/term/GO:0070727	PARP1 MYO7A DMBT1 HM13 TPP1
0.189242350275992	1	99	117464646464646	GO:0001942 Hair follicle development	https://amigo.geneontology.org/amigo/term/GO:0001942	ERCC2
0.192445691375237	1	101	115138613861386	GO:0021510 Spinal cord development	https://amigo.geneontology.org/amigo/term/GO:0021510	ERCC2
0.192881592829717	1	102	114009803921569	GO:0022404 Molting cycle process	https://amigo.geneontology.org/amigo/term/GO:0022404	ERCC2
0.192881592829717	1	102	114009803921569	GO:0022405 Hair cycle process	https://amigo.geneontology.org/amigo/term/GO:0022405	ERCC2
0.192881592829717	1	102	114009803921569	GO:1903432 Regulation of torc1 signaling	https://amigo.geneontology.org/amigo/term/GO:1903432	NPRL2
0.193687625260482	3	1222	285490998363339	GO:0044248 Cellular catabolic process	https://amigo.geneontology.org/amigo/term/GO:0044248	NPRL2 TPP1 MCAT
0.195571203581587	1	104	111817307692308	GO:0051100 Negative regulation of binding	https://amigo.geneontology.org/amigo/term/GO:0051100	GATA1
0.196210321030933	2	574	405191637630662	GO:0071407 Cellular response to organic cyclic compound	https://amigo.geneontology.org/amigo/term/GO:0071407	GATA1 PARP1
0.197761970699836	1	106	109707547169811	GO:0043500 Muscle adaptation	https://amigo.geneontology.org/amigo/term/GO:0043500	PARP1
0.197761970699836	1	106	109707547169811	GO:2001251 Negative regulation of chromosome organization	https://amigo.geneontology.org/amigo/term/GO:2001251	PARP1
0.199449037086925	1	108	107675925925926	GO:0032784 Regulation of dna-templated transcription elongation	https://amigo.geneontology.org/amigo/term/GO:0032784	PARP1
0.199449037086925	6	3743	186411969008816	GO:0051641 Cellular localization	https://amigo.geneontology.org/amigo/term/GO:0051641	PARP1 GATA1 MYO7A DMBT1 HM13 TPP1
0.199449037086925	1	108	107675925925926	GO:0090288 Negative regulation of cellular response to growth factor stimulus	https://amigo.geneontology.org/amigo/term/GO:0090288	SPRY3
0.199449037086925	2	583	39893653516295	GO:1903131 Mononuclear cell differentiation	https://amigo.geneontology.org/amigo/term/GO:1903131	GATA1 PARP1
0.199625783358979	1	109	106688073394495	GO:0002275 Myeloid cell activation involved in immune response	https://amigo.geneontology.org/amigo/term/GO:0002275	GATA1
0.199625783358979	6	3753	185915267785771	GO:0023051 Regulation of signaling	https://amigo.geneontology.org/amigo/term/GO:0023051	NPRL2 SPRY3 PARP1 EIF2A DGKE GATA1
0.199625783358979	1	109	106688073394495	GO:0038202 Torc1 signaling	https://amigo.geneontology.org/amigo/term/GO:0038202	NPRL2
0.199625783358979	1	109	106688073394495	GO:0062014 Negative regulation of small molecule metabolic process	https://amigo.geneontology.org/amigo/term/GO:0062014	PARP1
0.199633591141485	1	110	105718181818182	GO:0009062 Fatty acid catabolic process	https://amigo.geneontology.org/amigo/term/GO:0009062	MCAT
0.199633591141485	5	2868	20273709902371	GO:0009653 Anatomical structure morphogenesis	https://amigo.geneontology.org/amigo/term/GO:0009653	FHOD3 MYO7A GATA1 ERCC2 SPRY3
0.199633591141485	6	3758	185667908461948	GO:0010646 Regulation of cell communication	https://amigo.geneontology.org/amigo/term/GO:0010646	NPRL2 SPRY3 PARP1 EIF2A DGKE GATA1
0.199633591141485	1	110	105718181818182	GO:0090100 Positive regulation of transmembrane receptor protein serine/threonine kinase signaling pathway	https://amigo.geneontology.org/amigo/term/GO:0090100	PARP1

## Sheet: April_enrichment_in_females
Enrichment FDR	nGenes	Pathway Genes	Fold Enrichment	Pathway	URL	Genes
0.125050591537388	7	1028	479913925244665	GO:0007167 Enzyme-linked receptor protein signaling pathway	https://amigo.geneontology.org/amigo/term/GO:0007167	HIF1A USP9X SNX6 XDH SVEP1 FAT4 PLCG1
0.125050591537388	6	653	647584574690241	GO:0007169 Cell surface receptor protein tyrosine kinase signaling pathway	https://amigo.geneontology.org/amigo/term/GO:0007169	HIF1A XDH SVEP1 FAT4 PLCG1 SNX6
0.125050591537388	12	2868	294890325852669	GO:0009653 Anatomical structure morphogenesis	https://amigo.geneontology.org/amigo/term/GO:0009653	SVEP1 HIF1A GNAS PLCG1 XDH TTLL1 PTPRQ HMCN2 RHO FAT4 HUWE1 USP9X
0.125050591537388	2	23	612859025032938	GO:0031048 Regulatory ncrna-mediated heterochromatin formation	https://amigo.geneontology.org/amigo/term/GO:0031048	ZNFX1 TDRD9
0.125050591537388	2	24	587323232323232	GO:0048015 Phosphatidylinositol-mediated signaling	https://amigo.geneontology.org/amigo/term/GO:0048015	PLCG1 PI4KA
0.125050591537388	6	747	566094681757332	GO:0070848 Response to growth factor	https://amigo.geneontology.org/amigo/term/GO:0070848	HIF1A PLCG1 USP9X SNX6 XDH FAT4
0.125050591537388	6	715	591430387794024	GO:0071363 Cellular response to growth factor stimulus	https://amigo.geneontology.org/amigo/term/GO:0071363	HIF1A PLCG1 USP9X SNX6 XDH FAT4
0.131361178399544	3	138	153214756258235	GO:0001936 Regulation of endothelial cell proliferation	https://amigo.geneontology.org/amigo/term/GO:0001936	HIF1A XDH PLCG1
0.131361178399544	2	30	469858585858586	GO:0002862 Negative regulation of inflammatory response to antigenic stimulus	https://amigo.geneontology.org/amigo/term/GO:0002862	GNAS PLCG1
0.131361178399544	9	1859	341209839111937	GO:0022008 Neurogenesis	https://amigo.geneontology.org/amigo/term/GO:0022008	MYRF KDM4A TTLL1 HIF1A PTPRQ HMCN2 RHO FAT4 USP9X
0.131361178399544	8	1516	371919724954026	GO:0030182 Neuron differentiation	https://amigo.geneontology.org/amigo/term/GO:0030182	KDM4A TTLL1 HIF1A PTPRQ HMCN2 RHO FAT4 USP9X
0.131361178399544	11	2666	290797699424856	GO:0050793 Regulation of developmental process	https://amigo.geneontology.org/amigo/term/GO:0050793	HIF1A PLCG1 XDH KDM4A TTLL1 MYRF GRHL1 FAT4 HUWE1 GNAS NID1
0.132326107281676	3	190	111282296650718	GO:0000723 Telomere maintenance	https://amigo.geneontology.org/amigo/term/GO:0000723	TEP1 NOP10 NVL
0.132326107281676	1	4	17619696969697	GO:0001922 B-1 b cell homeostasis	https://amigo.geneontology.org/amigo/term/GO:0001922	HIF1A
0.132326107281676	3	161	13132693393563	GO:0001935 Endothelial cell proliferation	https://amigo.geneontology.org/amigo/term/GO:0001935	HIF1A XDH PLCG1
0.132326107281676	1	4	17619696969697	GO:0002387 Immune response in gut-associated lymphoid tissue	https://amigo.geneontology.org/amigo/term/GO:0002387	TTLL1
0.132326107281676	2	51	276387403446227	GO:0002861 Regulation of inflammatory response to antigenic stimulus	https://amigo.geneontology.org/amigo/term/GO:0002861	GNAS PLCG1
0.132326107281676	1	3	234929292929293	GO:0006145 Purine nucleobase catabolic process	https://amigo.geneontology.org/amigo/term/GO:0006145	XDH
0.132326107281676	1	3	234929292929293	GO:0006148 Inosine catabolic process	https://amigo.geneontology.org/amigo/term/GO:0006148	XDH
0.132326107281676	1	3	234929292929293	GO:0006149 Deoxyinosine catabolic process	https://amigo.geneontology.org/amigo/term/GO:0006149	XDH
0.132326107281676	1	4	17619696969697	GO:0006154 Adenosine catabolic process	https://amigo.geneontology.org/amigo/term/GO:0006154	XDH
0.132326107281676	1	4	17619696969697	GO:0006157 Deoxyadenosine catabolic process	https://amigo.geneontology.org/amigo/term/GO:0006157	XDH
0.132326107281676	6	1089	388312880874864	GO:0006259 Dna metabolic process	https://amigo.geneontology.org/amigo/term/GO:0006259	HUWE1 TEP1 SHOC1 USP9X NOP10 NVL
0.132326107281676	2	69	204286341677646	GO:0006278 Rna-templated dna biosynthetic process	https://amigo.geneontology.org/amigo/term/GO:0006278	NOP10 TEP1
0.132326107281676	2	47	299909735654416	GO:0007595 Lactation	https://amigo.geneontology.org/amigo/term/GO:0007595	HIF1A XDH
0.132326107281676	4	414	68095447225882	GO:0008544 Epidermis development	https://amigo.geneontology.org/amigo/term/GO:0008544	SVEP1 GNAS GRHL1 PTPRQ
0.132326107281676	7	1566	315039281705948	GO:0009719 Response to endogenous stimulus	https://amigo.geneontology.org/amigo/term/GO:0009719	HIF1A GNAS PLCG1 USP9X SNX6 XDH FAT4
0.132326107281676	2	68	20729055258467	GO:0010632 Regulation of epithelial cell migration	https://amigo.geneontology.org/amigo/term/GO:0010632	PLCG1 HIF1A
0.132326107281676	2	48	293661616161616	GO:0010634 Positive regulation of epithelial cell migration	https://amigo.geneontology.org/amigo/term/GO:0010634	PLCG1 HIF1A
0.132326107281676	1	3	234929292929293	GO:0021502 Neural fold elevation formation	https://amigo.geneontology.org/amigo/term/GO:0021502	HIF1A
0.132326107281676	14	4782	206336894668137	GO:0030154 Cell differentiation	https://amigo.geneontology.org/amigo/term/GO:0030154	MYRF HIF1A XDH KDM4A HUWE1 TTLL1 GRHL1 PTPRQ HMCN2 TDRD9 RHO FAT4 USP9X NID1
0.132326107281676	5	800	440492424242424	GO:0030855 Epithelial cell differentiation	https://amigo.geneontology.org/amigo/term/GO:0030855	XDH HIF1A GRHL1 PTPRQ FAT4
0.132326107281676	3	168	125854978354978	GO:0030856 Regulation of epithelial cell differentiation	https://amigo.geneontology.org/amigo/term/GO:0030856	XDH GRHL1 FAT4
0.132326107281676	1	4	17619696969697	GO:0031120 Snrna pseudouridine synthesis	https://amigo.geneontology.org/amigo/term/GO:0031120	NOP10
0.132326107281676	2	56	251709956709957	GO:0032092 Positive regulation of protein binding	https://amigo.geneontology.org/amigo/term/GO:0032092	NVL USP9X
0.132326107281676	3	223	948145128414187	GO:0032200 Telomere organization	https://amigo.geneontology.org/amigo/term/GO:0032200	TEP1 NOP10 NVL
0.132326107281676	3	254	832426628489621	GO:0043523 Regulation of neuron apoptotic process	https://amigo.geneontology.org/amigo/term/GO:0043523	HIF1A OXR1 SNX6
0.132326107281676	3	167	126608600979858	GO:0043524 Negative regulation of neuron apoptotic process	https://amigo.geneontology.org/amigo/term/GO:0043524	HIF1A OXR1 SNX6
0.132326107281676	2	57	24729399255715	GO:0043536 Positive regulation of blood vessel endothelial cell migration	https://amigo.geneontology.org/amigo/term/GO:0043536	PLCG1 HIF1A
0.132326107281676	2	78	180714840714841	GO:0045685 Regulation of glial cell differentiation	https://amigo.geneontology.org/amigo/term/GO:0045685	KDM4A MYRF
0.132326107281676	1	3	234929292929293	GO:0046038 Gmp catabolic process	https://amigo.geneontology.org/amigo/term/GO:0046038	XDH
0.132326107281676	1	4	17619696969697	GO:0046055 Dgmp catabolic process	https://amigo.geneontology.org/amigo/term/GO:0046055	XDH
0.132326107281676	1	4	17619696969697	GO:0046090 Deoxyadenosine metabolic process	https://amigo.geneontology.org/amigo/term/GO:0046090	XDH
0.132326107281676	1	3	234929292929293	GO:0046094 Deoxyinosine metabolic process	https://amigo.geneontology.org/amigo/term/GO:0046094	XDH
0.132326107281676	1	4	17619696969697	GO:0046098 Guanine metabolic process	https://amigo.geneontology.org/amigo/term/GO:0046098	XDH
0.132326107281676	1	4	17619696969697	GO:0046100 Hypoxanthine metabolic process	https://amigo.geneontology.org/amigo/term/GO:0046100	XDH
0.132326107281676	1	4	17619696969697	GO:0048014 Tie signaling pathway	https://amigo.geneontology.org/amigo/term/GO:0048014	SVEP1
0.132326107281676	8	1604	351515151515152	GO:0048699 Generation of neurons	https://amigo.geneontology.org/amigo/term/GO:0048699	KDM4A TTLL1 HIF1A PTPRQ HMCN2 RHO FAT4 USP9X
0.132326107281676	14	4287	230161658573135	GO:0048731 System development	https://amigo.geneontology.org/amigo/term/GO:0048731	MYRF SVEP1 HIF1A GNAS PLCG1 XDH KDM4A TTLL1 NID1 PTPRQ HMCN2 RHO FAT4 USP9X
0.132326107281676	14	4783	206293755028859	GO:0048869 Cellular developmental process	https://amigo.geneontology.org/amigo/term/GO:0048869	MYRF HIF1A XDH KDM4A HUWE1 TTLL1 GRHL1 PTPRQ HMCN2 TDRD9 RHO FAT4 USP9X NID1
0.132326107281676	3	255	829162210338681	GO:0050777 Negative regulation of immune response	https://amigo.geneontology.org/amigo/term/GO:0050777	SVEP1 GNAS PLCG1
0.132326107281676	4	414	68095447225882	GO:0050878 Regulation of body fluid levels	https://amigo.geneontology.org/amigo/term/GO:0050878	GNAS HIF1A XDH SVEP1
0.132326107281676	5	706	499141557215212	GO:0051276 Chromosome organization	https://amigo.geneontology.org/amigo/term/GO:0051276	TEP1 NOP10 KDM4A SHOC1 NVL
0.132326107281676	2	73	193092569530926	GO:0060113 Inner ear receptor cell differentiation	https://amigo.geneontology.org/amigo/term/GO:0060113	PTPRQ FAT4
0.132326107281676	1	3	234929292929293	GO:0060114 Vestibular receptor cell differentiation	https://amigo.geneontology.org/amigo/term/GO:0060114	PTPRQ
0.132326107281676	1	3	234929292929293	GO:0060118 Vestibular receptor cell development	https://amigo.geneontology.org/amigo/term/GO:0060118	PTPRQ
0.132326107281676	2	55	25628650137741	GO:0060119 Inner ear receptor cell development	https://amigo.geneontology.org/amigo/term/GO:0060119	PTPRQ FAT4
0.132326107281676	1	4	17619696969697	GO:0061030 Epithelial cell differentiation involved in mammary gland alveolus development	https://amigo.geneontology.org/amigo/term/GO:0061030	HIF1A
0.132326107281676	1	3	234929292929293	GO:0070101 Positive regulation of chemokine-mediated signaling pathway	https://amigo.geneontology.org/amigo/term/GO:0070101	HIF1A
0.132326107281676	2	48	293661616161616	GO:0070849 Response to epidermal growth factor	https://amigo.geneontology.org/amigo/term/GO:0070849	PLCG1 SNX6
0.132326107281676	2	43	327808315715292	GO:0071364 Cellular response to epidermal growth factor stimulus	https://amigo.geneontology.org/amigo/term/GO:0071364	PLCG1 SNX6
0.132326107281676	7	1293	381555696172866	GO:0071495 Cellular response to endogenous stimulus	https://amigo.geneontology.org/amigo/term/GO:0071495	HIF1A PLCG1 USP9X SNX6 XDH FAT4 GNAS
0.132326107281676	1	4	17619696969697	GO:0072137 Condensed mesenchymal cell proliferation	https://amigo.geneontology.org/amigo/term/GO:0072137	FAT4
0.132326107281676	1	4	17619696969697	GO:0120222 Regulation of blastocyst development	https://amigo.geneontology.org/amigo/term/GO:0120222	TTLL1
0.132326107281676	1	4	17619696969697	GO:1900408 Negative regulation of cellular response to oxidative stress	https://amigo.geneontology.org/amigo/term/GO:1900408	OXR1
0.132326107281676	7	1531	322241355422283	GO:2000026 Regulation of multicellular organismal development	https://amigo.geneontology.org/amigo/term/GO:2000026	HIF1A PLCG1 XDH KDM4A MYRF GRHL1 FAT4
0.132510851544974	3	258	819520789288231	GO:0046434 Organophosphate catabolic process	https://amigo.geneontology.org/amigo/term/GO:0046434	HIF1A XDH PLCG1
0.13986407602022	1	5	140957575757576	GO:0006196 Amp catabolic process	https://amigo.geneontology.org/amigo/term/GO:0006196	XDH
0.13986407602022	1	5	140957575757576	GO:0007192 Adenylate cyclase-activating serotonin receptor signaling pathway	https://amigo.geneontology.org/amigo/term/GO:0007192	GNAS
0.13986407602022	1	5	140957575757576	GO:0032286 Central nervous system myelin maintenance	https://amigo.geneontology.org/amigo/term/GO:0032286	MYRF
0.13986407602022	2	84	167806637806638	GO:0042490 Mechanoreceptor differentiation	https://amigo.geneontology.org/amigo/term/GO:0042490	PTPRQ FAT4
0.13986407602022	1	5	140957575757576	GO:0046059 Damp catabolic process	https://amigo.geneontology.org/amigo/term/GO:0046059	XDH
0.13986407602022	1	5	140957575757576	GO:0046113 Nucleobase catabolic process	https://amigo.geneontology.org/amigo/term/GO:0046113	XDH
0.13986407602022	1	5	140957575757576	GO:0046124 Purine deoxyribonucleoside catabolic process	https://amigo.geneontology.org/amigo/term/GO:0046124	XDH
0.13986407602022	1	5	140957575757576	GO:0050960 Detection of temperature stimulus involved in thermoception	https://amigo.geneontology.org/amigo/term/GO:0050960	RHO
0.13986407602022	1	5	140957575757576	GO:0061824 Cytosolic ciliogenesis	https://amigo.geneontology.org/amigo/term/GO:0061824	USP9X
0.13986407602022	1	5	140957575757576	GO:0097411 Hypoxia-inducible factor-1alpha signaling pathway	https://amigo.geneontology.org/amigo/term/GO:0097411	HIF1A
0.13986407602022	1	5	140957575757576	GO:1904515 Positive regulation of torc2 signaling	https://amigo.geneontology.org/amigo/term/GO:1904515	USP9X
0.140175166056964	1	7	100683982683983	GO:0001842 Neural fold formation	https://amigo.geneontology.org/amigo/term/GO:0001842	HIF1A
0.140175166056964	2	93	151567285760834	GO:0001938 Positive regulation of endothelial cell proliferation	https://amigo.geneontology.org/amigo/term/GO:0001938	HIF1A PLCG1
0.140175166056964	1	7	100683982683983	GO:0002248 Connective tissue replacement involved in inflammatory response wound healing	https://amigo.geneontology.org/amigo/term/GO:0002248	HIF1A
0.140175166056964	2	92	153214756258235	GO:0002437 Inflammatory response to antigenic stimulus	https://amigo.geneontology.org/amigo/term/GO:0002437	GNAS PLCG1
0.140175166056964	1	6	117464646464646	GO:0006204 Imp catabolic process	https://amigo.geneontology.org/amigo/term/GO:0006204	XDH
0.140175166056964	1	7	100683982683983	GO:0007023 Post-chaperonin tubulin folding pathway	https://amigo.geneontology.org/amigo/term/GO:0007023	TBCEL
0.140175166056964	2	99	142381389654117	GO:0007589 Body fluid secretion	https://amigo.geneontology.org/amigo/term/GO:0007589	HIF1A XDH
0.140175166056964	1	7	100683982683983	GO:0009172 Purine deoxyribonucleoside monophosphate catabolic process	https://amigo.geneontology.org/amigo/term/GO:0009172	XDH
0.140175166056964	2	102	138193701723114	GO:0010469 Regulation of signaling receptor activity	https://amigo.geneontology.org/amigo/term/GO:0010469	HIF1A SNX6
0.140175166056964	2	97	145317088409872	GO:0010631 Epithelial cell migration	https://amigo.geneontology.org/amigo/term/GO:0010631	PLCG1 HIF1A
0.140175166056964	1	6	117464646464646	GO:0030263 Apoptotic chromosome condensation	https://amigo.geneontology.org/amigo/term/GO:0030263	KDM4A
0.140175166056964	2	106	132978845054317	GO:0043535 Regulation of blood vessel endothelial cell migration	https://amigo.geneontology.org/amigo/term/GO:0043535	PLCG1 HIF1A
0.140175166056964	7	1703	289695546184096	GO:0045595 Regulation of cell differentiation	https://amigo.geneontology.org/amigo/term/GO:0045595	HIF1A XDH KDM4A MYRF GRHL1 FAT4 NID1
0.140175166056964	1	6	117464646464646	GO:0046054 Dgmp metabolic process	https://amigo.geneontology.org/amigo/term/GO:0046054	XDH
0.140175166056964	1	6	117464646464646	GO:0046102 Inosine metabolic process	https://amigo.geneontology.org/amigo/term/GO:0046102	XDH
0.140175166056964	1	7	100683982683983	GO:0046121 Deoxyribonucleoside catabolic process	https://amigo.geneontology.org/amigo/term/GO:0046121	XDH
0.140175166056964	1	6	117464646464646	GO:0046122 Purine deoxyribonucleoside metabolic process	https://amigo.geneontology.org/amigo/term/GO:0046122	XDH
0.140175166056964	1	7	100683982683983	GO:0046130 Purine ribonucleoside catabolic process	https://amigo.geneontology.org/amigo/term/GO:0046130	XDH
0.140175166056964	3	312	677680652680653	GO:0051402 Neuron apoptotic process	https://amigo.geneontology.org/amigo/term/GO:0051402	HIF1A OXR1 SNX6
0.140175166056964	6	1314	321820949218209	GO:0060429 Epithelium development	https://amigo.geneontology.org/amigo/term/GO:0060429	GNAS XDH HIF1A GRHL1 PTPRQ FAT4
0.140175166056964	1	6	117464646464646	GO:0060574 Intestinal epithelial cell maturation	https://amigo.geneontology.org/amigo/term/GO:0060574	HIF1A
0.140175166056964	1	6	117464646464646	GO:0060789 Hair follicle placode formation	https://amigo.geneontology.org/amigo/term/GO:0060789	GNAS
0.140175166056964	1	7	100683982683983	GO:0072257 Metanephric nephron tubule epithelial cell differentiation	https://amigo.geneontology.org/amigo/term/GO:0072257	FAT4
0.140175166056964	1	7	100683982683983	GO:0072307 Regulation of metanephric nephron tubule epithelial cell differentiation	https://amigo.geneontology.org/amigo/term/GO:0072307	FAT4
0.140175166056964	2	106	132978845054317	GO:0090130 Tissue migration	https://amigo.geneontology.org/amigo/term/GO:0090130	PLCG1 HIF1A
0.140175166056964	2	100	140957575757576	GO:0090132 Epithelium migration	https://amigo.geneontology.org/amigo/term/GO:0090132	PLCG1 HIF1A
0.140175166056964	3	300	704787878787879	GO:0090596 Sensory organ morphogenesis	https://amigo.geneontology.org/amigo/term/GO:0090596	HIF1A PTPRQ RHO
0.140175166056964	1	6	117464646464646	GO:0141006 Pirna-mediated retrotransposon silencing by heterochromatin formation	https://amigo.geneontology.org/amigo/term/GO:0141006	TDRD9
0.140175166056964	1	6	117464646464646	GO:1902083 Negative regulation of peptidyl-cysteine s-nitrosylation	https://amigo.geneontology.org/amigo/term/GO:1902083	OXR1
0.140175166056964	1	7	100683982683983	GO:1903939 Regulation of torc2 signaling	https://amigo.geneontology.org/amigo/term/GO:1903939	USP9X
0.140175166056964	1	7	100683982683983	GO:1905323 Telomerase holoenzyme complex assembly	https://amigo.geneontology.org/amigo/term/GO:1905323	NVL
0.140228991912961	2	109	129318876841813	GO:0007173 Epidermal growth factor receptor signaling pathway	https://amigo.geneontology.org/amigo/term/GO:0007173	PLCG1 SNX6
0.140228991912961	2	109	129318876841813	GO:0010595 Positive regulation of endothelial cell migration	https://amigo.geneontology.org/amigo/term/GO:0010595	PLCG1 HIF1A
0.140228991912961	1	8	880984848484849	GO:0010637 Negative regulation of mitochondrial fusion	https://amigo.geneontology.org/amigo/term/GO:0010637	HUWE1
0.140228991912961	2	114	123646996278575	GO:0014013 Regulation of gliogenesis	https://amigo.geneontology.org/amigo/term/GO:0014013	KDM4A MYRF
0.140228991912961	1	8	880984848484849	GO:0016562 Protein import into peroxisome matrix receptor recycling	https://amigo.geneontology.org/amigo/term/GO:0016562	USP9X
0.140228991912961	1	8	880984848484849	GO:0018095 Protein polyglutamylation	https://amigo.geneontology.org/amigo/term/GO:0018095	TTLL1
0.140228991912961	1	8	880984848484849	GO:0032364 Intracellular oxygen homeostasis	https://amigo.geneontology.org/amigo/term/GO:0032364	HIF1A
0.140228991912961	1	8	880984848484849	GO:0032906 Transforming growth factor beta2 production	https://amigo.geneontology.org/amigo/term/GO:0032906	HIF1A
0.140228991912961	1	8	880984848484849	GO:0032909 Regulation of transforming growth factor beta2 production	https://amigo.geneontology.org/amigo/term/GO:0032909	HIF1A
0.140228991912961	1	8	880984848484849	GO:0040031 Snrna modification	https://amigo.geneontology.org/amigo/term/GO:0040031	NOP10
0.140228991912961	1	8	880984848484849	GO:0045959 Negative regulation of complement activation classical pathway	https://amigo.geneontology.org/amigo/term/GO:0045959	SVEP1
0.140228991912961	1	8	880984848484849	GO:0046053 Damp metabolic process	https://amigo.geneontology.org/amigo/term/GO:0046053	XDH
0.140228991912961	1	8	880984848484849	GO:0050955 Thermoception	https://amigo.geneontology.org/amigo/term/GO:0050955	RHO
0.140228991912961	1	8	880984848484849	GO:0051541 Elastin metabolic process	https://amigo.geneontology.org/amigo/term/GO:0051541	HIF1A
0.140228991912961	1	8	880984848484849	GO:0060040 Retinal bipolar neuron differentiation	https://amigo.geneontology.org/amigo/term/GO:0060040	RHO
0.140228991912961	3	332	636856516976999	GO:0090287 Regulation of cellular response to growth factor stimulus	https://amigo.geneontology.org/amigo/term/GO:0090287	HIF1A SNX6 XDH
0.140228991912961	1	8	880984848484849	GO:0120197 Mucociliary clearance	https://amigo.geneontology.org/amigo/term/GO:0120197	TTLL1
0.140590740706848	2	115	122571805006588	GO:0051099 Positive regulation of binding	https://amigo.geneontology.org/amigo/term/GO:0051099	NVL USP9X
0.141895043444793	1	9	783097643097643	GO:0002071 Glandular epithelial cell maturation	https://amigo.geneontology.org/amigo/term/GO:0002071	HIF1A
0.141895043444793	1	9	783097643097643	GO:0002246 Wound healing involved in inflammatory response	https://amigo.geneontology.org/amigo/term/GO:0002246	HIF1A
0.141895043444793	1	9	783097643097643	GO:0006152 Purine nucleoside catabolic process	https://amigo.geneontology.org/amigo/term/GO:0006152	XDH
0.141895043444793	9	2764	229489540849888	GO:0007399 Nervous system development	https://amigo.geneontology.org/amigo/term/GO:0007399	MYRF KDM4A TTLL1 HIF1A PTPRQ HMCN2 RHO FAT4 USP9X
0.141895043444793	4	645	437077754287057	GO:0007423 Sensory organ development	https://amigo.geneontology.org/amigo/term/GO:0007423	HIF1A PTPRQ RHO FAT4
0.141895043444793	1	9	783097643097643	GO:0030450 Regulation of complement activation classical pathway	https://amigo.geneontology.org/amigo/term/GO:0030450	SVEP1
0.141895043444793	1	9	783097643097643	GO:0031118 Rrna pseudouridine synthesis	https://amigo.geneontology.org/amigo/term/GO:0031118	NOP10
0.141895043444793	1	9	783097643097643	GO:0046886 Positive regulation of hormone biosynthetic process	https://amigo.geneontology.org/amigo/term/GO:0046886	HIF1A
0.141895043444793	5	1002	351690558277385	GO:0051093 Negative regulation of developmental process	https://amigo.geneontology.org/amigo/term/GO:0051093	XDH KDM4A HIF1A HUWE1 GNAS
0.141895043444793	1	9	783097643097643	GO:0061072 Iris morphogenesis	https://amigo.geneontology.org/amigo/term/GO:0061072	HIF1A
0.141895043444793	1	9	783097643097643	GO:0071447 Cellular response to hydroperoxide	https://amigo.geneontology.org/amigo/term/GO:0071447	OXR1
0.141895043444793	1	9	783097643097643	GO:2000169 Regulation of peptidyl-cysteine s-nitrosylation	https://amigo.geneontology.org/amigo/term/GO:2000169	OXR1
0.141939359346752	1	10	704787878787879	GO:0000255 Allantoin metabolic process	https://amigo.geneontology.org/amigo/term/GO:0000255	XDH
0.141939359346752	1	15	469858585858586	GO:0000722 Telomere maintenance via recombination	https://amigo.geneontology.org/amigo/term/GO:0000722	TEP1
0.141939359346752	1	15	469858585858586	GO:0002069 Columnar/cuboidal epithelial cell maturation	https://amigo.geneontology.org/amigo/term/GO:0002069	HIF1A
0.141939359346752	1	15	469858585858586	GO:0002713 Negative regulation of b cell mediated immunity	https://amigo.geneontology.org/amigo/term/GO:0002713	SVEP1
0.141939359346752	1	15	469858585858586	GO:0002890 Negative regulation of immunoglobulin mediated immune response	https://amigo.geneontology.org/amigo/term/GO:0002890	SVEP1
0.141939359346752	1	11	640716253443526	GO:0002924 Negative regulation of humoral immune response mediated by circulating immunoglobulin	https://amigo.geneontology.org/amigo/term/GO:0002924	SVEP1
0.141939359346752	1	11	640716253443526	GO:0002934 Desmosome organization	https://amigo.geneontology.org/amigo/term/GO:0002934	GRHL1
0.141939359346752	2	143	98571731299004	GO:0006195 Purine nucleotide catabolic process	https://amigo.geneontology.org/amigo/term/GO:0006195	HIF1A XDH
0.141939359346752	1	11	640716253443526	GO:0006307 Dna alkylation repair	https://amigo.geneontology.org/amigo/term/GO:0006307	USP9X
0.141939359346752	1	13	542144522144522	GO:0006465 Signal peptide processing	https://amigo.geneontology.org/amigo/term/GO:0006465	SPCS2
0.141939359346752	11	3920	197772108843537	GO:0006996 Organelle organization	https://amigo.geneontology.org/amigo/term/GO:0006996	HUWE1 TTLL1 TEP1 TBCEL SHOC1 USP9X NOP10 KDM4A TDRD9 RHO NVL
0.141939359346752	1	10	704787878787879	GO:0007021 Tubulin complex assembly	https://amigo.geneontology.org/amigo/term/GO:0007021	TBCEL
0.141939359346752	2	155	909403714565005	GO:0007127 Meiosis i	https://amigo.geneontology.org/amigo/term/GO:0007127	SHOC1 TDRD9
0.141939359346752	1	12	587323232323232	GO:0007175 Negative regulation of epidermal growth factor-activated receptor activity	https://amigo.geneontology.org/amigo/term/GO:0007175	SNX6
0.141939359346752	1	15	469858585858586	GO:0007176 Regulation of epidermal growth factor-activated receptor activity	https://amigo.geneontology.org/amigo/term/GO:0007176	SNX6
0.141939359346752	1	11	640716253443526	GO:0007191 Adenylate cyclase-activating dopamine receptor signaling pathway	https://amigo.geneontology.org/amigo/term/GO:0007191	GNAS
0.141939359346752	1	14	503419913419913	GO:0007210 Serotonin receptor signaling pathway	https://amigo.geneontology.org/amigo/term/GO:0007210	GNAS
0.141939359346752	5	1121	314356770199768	GO:0007417 Central nervous system development	https://amigo.geneontology.org/amigo/term/GO:0007417	MYRF KDM4A TTLL1 HIF1A FAT4
0.141939359346752	1	12	587323232323232	GO:0009120 Deoxyribonucleoside metabolic process	https://amigo.geneontology.org/amigo/term/GO:0009120	XDH
0.141939359346752	1	11	640716253443526	GO:0009128 Purine nucleoside monophosphate catabolic process	https://amigo.geneontology.org/amigo/term/GO:0009128	XDH
0.141939359346752	2	134	105192220714609	GO:0009154 Purine ribonucleotide catabolic process	https://amigo.geneontology.org/amigo/term/GO:0009154	HIF1A XDH
0.141939359346752	1	11	640716253443526	GO:0009155 Purine deoxyribonucleotide catabolic process	https://amigo.geneontology.org/amigo/term/GO:0009155	XDH
0.141939359346752	1	15	469858585858586	GO:0009159 Deoxyribonucleoside monophosphate catabolic process	https://amigo.geneontology.org/amigo/term/GO:0009159	XDH
0.141939359346752	1	11	640716253443526	GO:0009169 Purine ribonucleoside monophosphate catabolic process	https://amigo.geneontology.org/amigo/term/GO:0009169	XDH
0.141939359346752	1	12	587323232323232	GO:0009170 Purine deoxyribonucleoside monophosphate metabolic process	https://amigo.geneontology.org/amigo/term/GO:0009170	XDH
0.141939359346752	2	141	999699118848055	GO:0009261 Ribonucleotide catabolic process	https://amigo.geneontology.org/amigo/term/GO:0009261	HIF1A XDH
0.141939359346752	2	147	958895073180788	GO:0009581 Detection of external stimulus	https://amigo.geneontology.org/amigo/term/GO:0009581	RHO PTPRQ
0.141939359346752	2	150	939717171717172	GO:0009582 Detection of abiotic stimulus	https://amigo.geneontology.org/amigo/term/GO:0009582	RHO PTPRQ
0.141939359346752	3	394	536640516843562	GO:0010506 Regulation of autophagy	https://amigo.geneontology.org/amigo/term/GO:0010506	HIF1A KDM4A SNX6
0.141939359346752	1	13	542144522144522	GO:0010572 Positive regulation of platelet activation	https://amigo.geneontology.org/amigo/term/GO:0010572	SVEP1
0.141939359346752	1	15	469858585858586	GO:0010635 Regulation of mitochondrial fusion	https://amigo.geneontology.org/amigo/term/GO:0010635	HUWE1
0.141939359346752	1	14	503419913419913	GO:0016056 G protein-coupled opsin signaling pathway	https://amigo.geneontology.org/amigo/term/GO:0016056	RHO
0.141939359346752	1	14	503419913419913	GO:0017014 Protein nitrosylation	https://amigo.geneontology.org/amigo/term/GO:0017014	OXR1
0.141939359346752	1	14	503419913419913	GO:0018119 Peptidyl-cysteine s-nitrosylation	https://amigo.geneontology.org/amigo/term/GO:0018119	OXR1
0.141939359346752	1	14	503419913419913	GO:0021702 Cerebellar purkinje cell differentiation	https://amigo.geneontology.org/amigo/term/GO:0021702	TTLL1
0.141939359346752	2	146	965462847654628	GO:0021987 Cerebral cortex development	https://amigo.geneontology.org/amigo/term/GO:0021987	HIF1A FAT4
0.141939359346752	2	149	946023998372992	GO:0030879 Mammary gland development	https://amigo.geneontology.org/amigo/term/GO:0030879	HIF1A XDH
0.141939359346752	1	15	469858585858586	GO:0030949 Positive regulation of vascular endothelial growth factor receptor signaling pathway	https://amigo.geneontology.org/amigo/term/GO:0030949	HIF1A
0.141939359346752	2	143	98571731299004	GO:0031047 Regulatory ncrna-mediated gene silencing	https://amigo.geneontology.org/amigo/term/GO:0031047	ZNFX1 TDRD9
0.141939359346752	5	1125	313239057239057	GO:0031399 Regulation of protein modification process	https://amigo.geneontology.org/amigo/term/GO:0031399	HUWE1 XDH OXR1 HIF1A SNX6
0.141939359346752	3	378	559355459355459	GO:0031400 Negative regulation of protein modification process	https://amigo.geneontology.org/amigo/term/GO:0031400	XDH OXR1 SNX6
0.141939359346752	2	153	921291344820757	GO:0032006 Regulation of tor signaling	https://amigo.geneontology.org/amigo/term/GO:0032006	USP9X HIF1A
0.141939359346752	1	15	469858585858586	GO:0032352 Positive regulation of hormone metabolic process	https://amigo.geneontology.org/amigo/term/GO:0032352	HIF1A
0.141939359346752	1	11	640716253443526	GO:0032836 Glomerular basement membrane development	https://amigo.geneontology.org/amigo/term/GO:0032836	NID1
0.141939359346752	1	10	704787878787879	GO:0035520 Monoubiquitinated protein deubiquitination	https://amigo.geneontology.org/amigo/term/GO:0035520	USP9X
0.141939359346752	2	130	108428904428904	GO:0038127 Erbb signaling pathway	https://amigo.geneontology.org/amigo/term/GO:0038127	PLCG1 SNX6
0.141939359346752	1	14	503419913419913	GO:0038203 Torc2 signaling	https://amigo.geneontology.org/amigo/term/GO:0038203	USP9X
0.141939359346752	1	13	542144522144522	GO:0040015 Negative regulation of multicellular organism growth	https://amigo.geneontology.org/amigo/term/GO:0040015	GNAS
0.141939359346752	1	15	469858585858586	GO:0042454 Ribonucleoside catabolic process	https://amigo.geneontology.org/amigo/term/GO:0042454	XDH
0.141939359346752	1	14	503419913419913	GO:0042541 Hemoglobin biosynthetic process	https://amigo.geneontology.org/amigo/term/GO:0042541	HIF1A
0.141939359346752	2	124	113675464320626	GO:0043393 Regulation of protein binding	https://amigo.geneontology.org/amigo/term/GO:0043393	NVL USP9X
0.141939359346752	10	3331	211584472767301	GO:0043412 Macromolecule modification	https://amigo.geneontology.org/amigo/term/GO:0043412	HUWE1 USP9X NOP10 XDH TTLL1 PTPRQ OXR1 DTX3 HIF1A SNX6
0.141939359346752	2	134	105192220714609	GO:0043534 Blood vessel endothelial cell migration	https://amigo.geneontology.org/amigo/term/GO:0043534	PLCG1 HIF1A
0.141939359346752	5	1072	328725689733152	GO:0044093 Positive regulation of molecular function	https://amigo.geneontology.org/amigo/term/GO:0044093	NVL XDH HIF1A USP9X GNAS
0.141939359346752	1	11	640716253443526	GO:0045602 Negative regulation of endothelial cell differentiation	https://amigo.geneontology.org/amigo/term/GO:0045602	XDH
0.141939359346752	1	13	542144522144522	GO:0045906 Negative regulation of vasoconstriction	https://amigo.geneontology.org/amigo/term/GO:0045906	SVEP1
0.141939359346752	1	15	469858585858586	GO:0045916 Negative regulation of complement activation	https://amigo.geneontology.org/amigo/term/GO:0045916	SVEP1
0.141939359346752	1	11	640716253443526	GO:0046085 Adenosine metabolic process	https://amigo.geneontology.org/amigo/term/GO:0046085	XDH
0.141939359346752	2	145	972121212121212	GO:0048565 Digestive tract development	https://amigo.geneontology.org/amigo/term/GO:0048565	HIF1A FAT4
0.141939359346752	7	1882	262142144076257	GO:0048585 Negative regulation of response to stimulus	https://amigo.geneontology.org/amigo/term/GO:0048585	SVEP1 HIF1A SNX6 XDH OXR1 GNAS PLCG1
0.141939359346752	2	142	99265898420828	GO:0048593 Camera-type eye morphogenesis	https://amigo.geneontology.org/amigo/term/GO:0048593	HIF1A RHO
0.141939359346752	1	15	469858585858586	GO:0048712 Negative regulation of astrocyte differentiation	https://amigo.geneontology.org/amigo/term/GO:0048712	KDM4A
0.141939359346752	3	377	560839160839161	GO:0050678 Regulation of epithelial cell proliferation	https://amigo.geneontology.org/amigo/term/GO:0050678	HIF1A XDH PLCG1
0.141939359346752	3	396	533930211202938	GO:0050767 Regulation of neurogenesis	https://amigo.geneontology.org/amigo/term/GO:0050767	KDM4A HIF1A MYRF
0.141939359346752	1	12	587323232323232	GO:0051000 Positive regulation of nitric-oxide synthase activity	https://amigo.geneontology.org/amigo/term/GO:0051000	HIF1A
0.141939359346752	2	156	903574203574204	GO:0055123 Digestive system development	https://amigo.geneontology.org/amigo/term/GO:0055123	HIF1A FAT4
0.141939359346752	1	13	542144522144522	GO:0060788 Ectodermal placode formation	https://amigo.geneontology.org/amigo/term/GO:0060788	GNAS
0.141939359346752	1	12	587323232323232	GO:0070099 Regulation of chemokine-mediated signaling pathway	https://amigo.geneontology.org/amigo/term/GO:0070099	HIF1A
0.141939359346752	1	15	469858585858586	GO:0070243 Regulation of thymocyte apoptotic process	https://amigo.geneontology.org/amigo/term/GO:0070243	HIF1A
0.141939359346752	1	10	704787878787879	GO:0070244 Negative regulation of thymocyte apoptotic process	https://amigo.geneontology.org/amigo/term/GO:0070244	HIF1A
0.141939359346752	1	14	503419913419913	GO:0071107 Response to parathyroid hormone	https://amigo.geneontology.org/amigo/term/GO:0071107	GNAS
0.141939359346752	1	14	503419913419913	GO:0071377 Cellular response to glucagon stimulus	https://amigo.geneontology.org/amigo/term/GO:0071377	GNAS
0.141939359346752	1	15	469858585858586	GO:0071696 Ectodermal placode development	https://amigo.geneontology.org/amigo/term/GO:0071696	GNAS
0.141939359346752	1	13	542144522144522	GO:0071697 Ectodermal placode morphogenesis	https://amigo.geneontology.org/amigo/term/GO:0071697	GNAS
0.141939359346752	1	13	542144522144522	GO:0071947 Protein deubiquitination involved in ubiquitin-dependent protein catabolic process	https://amigo.geneontology.org/amigo/term/GO:0071947	USP9X
0.141939359346752	1	14	503419913419913	GO:0072182 Regulation of nephron tubule epithelial cell differentiation	https://amigo.geneontology.org/amigo/term/GO:0072182	FAT4
0.141939359346752	1	13	542144522144522	GO:0097709 Connective tissue replacement	https://amigo.geneontology.org/amigo/term/GO:0097709	HIF1A
0.141939359346752	2	137	102888741428887	GO:0098773 Skin epidermis development	https://amigo.geneontology.org/amigo/term/GO:0098773	GNAS GRHL1
0.141939359346752	1	11	640716253443526	GO:0110011 Regulation of basement membrane organization	https://amigo.geneontology.org/amigo/term/GO:0110011	NID1
0.141939359346752	1	13	542144522144522	GO:0141176 Gene silencing by pirna-directed dna methylation	https://amigo.geneontology.org/amigo/term/GO:0141176	TDRD9
0.141939359346752	1	13	542144522144522	GO:0141196 Retrotransposon silencing by pirna-directed dna methylation	https://amigo.geneontology.org/amigo/term/GO:0141196	TDRD9
0.141939359346752	1	12	587323232323232	GO:1900747 Negative regulation of vascular endothelial growth factor signaling pathway	https://amigo.geneontology.org/amigo/term/GO:1900747	XDH
0.141939359346752	1	14	503419913419913	GO:1902548 Negative regulation of cellular response to vascular endothelial growth factor stimulus	https://amigo.geneontology.org/amigo/term/GO:1902548	XDH
0.141939359346752	1	11	640716253443526	GO:1902883 Negative regulation of response to oxidative stress	https://amigo.geneontology.org/amigo/term/GO:1902883	OXR1
0.141939359346752	1	13	542144522144522	GO:1903377 Negative regulation of oxidative stress-induced neuron intrinsic apoptotic signaling pathway	https://amigo.geneontology.org/amigo/term/GO:1903377	HIF1A
0.141939359346752	1	10	704787878787879	GO:1904749 Regulation of protein localization to nucleolus	https://amigo.geneontology.org/amigo/term/GO:1904749	NVL
0.141939359346752	2	157	897818953869909	GO:2000377 Regulation of reactive oxygen species metabolic process	https://amigo.geneontology.org/amigo/term/GO:2000377	XDH HIF1A
0.141939359346752	1	12	587323232323232	GO:2001046 Positive regulation of integrin-mediated signaling pathway	https://amigo.geneontology.org/amigo/term/GO:2001046	NID1
0.141939359346752	1	14	503419913419913	GO:2001053 Regulation of mesenchymal cell apoptotic process	https://amigo.geneontology.org/amigo/term/GO:2001053	HIF1A
0.141939359346752	1	11	640716253443526	GO:2001054 Negative regulation of mesenchymal cell apoptotic process	https://amigo.geneontology.org/amigo/term/GO:2001054	HIF1A
0.142371116289338	3	419	504621392926882	GO:0001701 In utero embryonic development	https://amigo.geneontology.org/amigo/term/GO:0001701	TTLL1 HIF1A PLCG1
0.142581353219556	1	16	440492424242424	GO:0009158 Ribonucleoside monophosphate catabolic process	https://amigo.geneontology.org/amigo/term/GO:0009158	XDH
0.142581353219556	5	1143	308306158699859	GO:0009894 Regulation of catabolic process	https://amigo.geneontology.org/amigo/term/GO:0009894	HIF1A PSMD2 KDM4A USP9X SNX6
0.142581353219556	1	16	440492424242424	GO:0016558 Protein import into peroxisome matrix	https://amigo.geneontology.org/amigo/term/GO:0016558	USP9X
0.142581353219556	1	16	440492424242424	GO:0021694 Cerebellar purkinje cell layer formation	https://amigo.geneontology.org/amigo/term/GO:0021694	TTLL1
0.142581353219556	2	160	880984848484849	GO:0030168 Platelet activation	https://amigo.geneontology.org/amigo/term/GO:0030168	GNAS SVEP1
0.142581353219556	2	163	86477040342071	GO:0031507 Heterochromatin formation	https://amigo.geneontology.org/amigo/term/GO:0031507	ZNFX1 TDRD9
0.142581353219556	2	163	86477040342071	GO:0061982 Meiosis i cell cycle process	https://amigo.geneontology.org/amigo/term/GO:0061982	SHOC1 TDRD9
0.142581353219556	2	163	86477040342071	GO:0072006 Nephron development	https://amigo.geneontology.org/amigo/term/GO:0072006	NID1 FAT4
0.142581353219556	1	16	440492424242424	GO:0072160 Nephron tubule epithelial cell differentiation	https://amigo.geneontology.org/amigo/term/GO:0072160	FAT4
0.142581353219556	2	160	880984848484849	GO:0072523 Purine-containing compound catabolic process	https://amigo.geneontology.org/amigo/term/GO:0072523	XDH HIF1A
0.142581353219556	1	16	440492424242424	GO:0097152 Mesenchymal cell apoptotic process	https://amigo.geneontology.org/amigo/term/GO:0097152	HIF1A
0.142581353219556	1	16	440492424242424	GO:0140966 Pirna-mediated heterochromatin formation	https://amigo.geneontology.org/amigo/term/GO:0140966	TDRD9
0.142581353219556	1	16	440492424242424	GO:1901526 Positive regulation of mitophagy	https://amigo.geneontology.org/amigo/term/GO:1901526	HIF1A
0.142729516551129	4	768	36707702020202	GO:0006338 Chromatin remodeling	https://amigo.geneontology.org/amigo/term/GO:0006338	KDM4A ZNFX1 HUWE1 TDRD9
0.146563639998139	1	17	41458110516934	GO:0000712 Resolution of meiotic recombination intermediates	https://amigo.geneontology.org/amigo/term/GO:0000712	SHOC1
0.146563639998139	1	17	41458110516934	GO:0009151 Purine deoxyribonucleotide metabolic process	https://amigo.geneontology.org/amigo/term/GO:0009151	XDH
0.146563639998139	2	168	839033189033189	GO:0009166 Nucleotide catabolic process	https://amigo.geneontology.org/amigo/term/GO:0009166	HIF1A XDH
0.146563639998139	1	17	41458110516934	GO:0009642 Response to light intensity	https://amigo.geneontology.org/amigo/term/GO:0009642	RHO
0.146563639998139	1	17	41458110516934	GO:0050910 Detection of mechanical stimulus involved in sensory perception of sound	https://amigo.geneontology.org/amigo/term/GO:0050910	PTPRQ
0.146563639998139	1	17	41458110516934	GO:0060644 Mammary gland epithelial cell differentiation	https://amigo.geneontology.org/amigo/term/GO:0060644	HIF1A
0.146563639998139	1	17	41458110516934	GO:2001212 Regulation of vasculogenesis	https://amigo.geneontology.org/amigo/term/GO:2001212	XDH
0.146844019554448	1	19	370940988835726	GO:0001522 Pseudouridine synthesis	https://amigo.geneontology.org/amigo/term/GO:0001522	NOP10
0.146844019554448	4	796	354164763209989	GO:0001944 Vasculature development	https://amigo.geneontology.org/amigo/term/GO:0001944	SVEP1 HIF1A PLCG1 XDH
0.146844019554448	1	19	370940988835726	GO:0002921 Negative regulation of humoral immune response	https://amigo.geneontology.org/amigo/term/GO:0002921	SVEP1
0.146844019554448	1	18	391548821548822	GO:0002923 Regulation of humoral immune response mediated by circulating immunoglobulin	https://amigo.geneontology.org/amigo/term/GO:0002923	SVEP1
0.146844019554448	8	2574	219048291775565	GO:0003008 System process	https://amigo.geneontology.org/amigo/term/GO:0003008	GNAS KDM4A TTLL1 HIF1A MYRF PTPRQ RHO SVEP1
0.146844019554448	1	20	352393939393939	GO:0006089 Lactate metabolic process	https://amigo.geneontology.org/amigo/term/GO:0006089	HIF1A
0.146844019554448	9	3099	204681862184282	GO:0007166 Cell surface receptor signaling pathway	https://amigo.geneontology.org/amigo/term/GO:0007166	NID1 HIF1A USP9X SNX6 XDH PLCG1 SVEP1 DTX3 FAT4
0.146844019554448	1	20	352393939393939	GO:0007603 Phototransduction visible light	https://amigo.geneontology.org/amigo/term/GO:0007603	RHO
0.146844019554448	1	20	352393939393939	GO:0009125 Nucleoside monophosphate catabolic process	https://amigo.geneontology.org/amigo/term/GO:0009125	XDH
0.146844019554448	1	20	352393939393939	GO:0009164 Nucleoside catabolic process	https://amigo.geneontology.org/amigo/term/GO:0009164	XDH
0.146844019554448	2	183	770259976817354	GO:0010594 Regulation of endothelial cell migration	https://amigo.geneontology.org/amigo/term/GO:0010594	PLCG1 HIF1A
0.146844019554448	1	20	352393939393939	GO:0019896 Axonal transport of mitochondrion	https://amigo.geneontology.org/amigo/term/GO:0019896	HIF1A
0.146844019554448	1	19	370940988835726	GO:0020027 Hemoglobin metabolic process	https://amigo.geneontology.org/amigo/term/GO:0020027	HIF1A
0.146844019554448	1	19	370940988835726	GO:0031643 Positive regulation of myelination	https://amigo.geneontology.org/amigo/term/GO:0031643	MYRF
0.146844019554448	2	174	81010101010101	GO:0031929 Tor signaling	https://amigo.geneontology.org/amigo/term/GO:0031929	USP9X HIF1A
0.146844019554448	1	20	352393939393939	GO:0033194 Response to hydroperoxide	https://amigo.geneontology.org/amigo/term/GO:0033194	OXR1
0.146844019554448	9	3125	202978909090909	GO:0036211 Protein modification process	https://amigo.geneontology.org/amigo/term/GO:0036211	HUWE1 USP9X XDH TTLL1 PTPRQ OXR1 DTX3 HIF1A SNX6
0.146844019554448	1	18	391548821548822	GO:0043217 Myelin maintenance	https://amigo.geneontology.org/amigo/term/GO:0043217	MYRF
0.146844019554448	1	18	391548821548822	GO:0043605 Amide catabolic process	https://amigo.geneontology.org/amigo/term/GO:0043605	XDH
0.146844019554448	2	172	819520789288231	GO:0045766 Positive regulation of angiogenesis	https://amigo.geneontology.org/amigo/term/GO:0045766	HIF1A PLCG1
0.146844019554448	1	20	352393939393939	GO:0046040 Imp metabolic process	https://amigo.geneontology.org/amigo/term/GO:0046040	XDH
0.146844019554448	2	182	774492174492175	GO:0046488 Phosphatidylinositol metabolic process	https://amigo.geneontology.org/amigo/term/GO:0046488	PLCG1 PI4KA
0.146844019554448	2	173	814783674899282	GO:0048592 Eye morphogenesis	https://amigo.geneontology.org/amigo/term/GO:0048592	HIF1A RHO
0.146844019554448	3	454	465718862635162	GO:0050673 Epithelial cell proliferation	https://amigo.geneontology.org/amigo/term/GO:0050673	HIF1A XDH PLCG1
0.146844019554448	2	172	819520789288231	GO:0050728 Negative regulation of inflammatory response	https://amigo.geneontology.org/amigo/term/GO:0050728	GNAS PLCG1
0.146844019554448	1	20	352393939393939	GO:0050999 Regulation of nitric-oxide synthase activity	https://amigo.geneontology.org/amigo/term/GO:0050999	HIF1A
0.146844019554448	7	2141	230430413429012	GO:0051246 Regulation of protein metabolic process	https://amigo.geneontology.org/amigo/term/GO:0051246	HUWE1 XDH OXR1 PSMD2 HIF1A USP9X SNX6
0.146844019554448	4	811	347614243545193	GO:0051248 Negative regulation of protein metabolic process	https://amigo.geneontology.org/amigo/term/GO:0051248	XDH OXR1 USP9X SNX6
0.146844019554448	2	179	787472490265786	GO:0060041 Retina development in camera-type eye	https://amigo.geneontology.org/amigo/term/GO:0060041	HIF1A RHO
0.146844019554448	1	18	391548821548822	GO:0060576 Intestinal epithelial cell development	https://amigo.geneontology.org/amigo/term/GO:0060576	HIF1A
0.146844019554448	1	20	352393939393939	GO:0061298 Retina vasculature development in camera-type eye	https://amigo.geneontology.org/amigo/term/GO:0061298	HIF1A
0.146844019554448	1	18	391548821548822	GO:0071380 Cellular response to prostaglandin e stimulus	https://amigo.geneontology.org/amigo/term/GO:0071380	GNAS
0.146844019554448	2	178	791896493020089	GO:0071897 Dna biosynthetic process	https://amigo.geneontology.org/amigo/term/GO:0071897	NOP10 TEP1
0.146844019554448	5	1192	29563249949156	GO:0072359 Circulatory system development	https://amigo.geneontology.org/amigo/term/GO:0072359	SVEP1 HIF1A PLCG1 XDH FAT4
0.146844019554448	1	19	370940988835726	GO:0141005 Retrotransposon silencing by heterochromatin formation	https://amigo.geneontology.org/amigo/term/GO:0141005	TDRD9
0.146844019554448	1	20	352393939393939	GO:1902570 Protein localization to nucleolus	https://amigo.geneontology.org/amigo/term/GO:1902570	NVL
0.146844019554448	1	20	352393939393939	GO:1903376 Regulation of oxidative stress-induced neuron intrinsic apoptotic signaling pathway	https://amigo.geneontology.org/amigo/term/GO:1903376	HIF1A
0.146844019554448	1	19	370940988835726	GO:1903599 Positive regulation of autophagy of mitochondrion	https://amigo.geneontology.org/amigo/term/GO:1903599	HIF1A
0.146844019554448	2	175	805471861471861	GO:1904018 Positive regulation of vasculature development	https://amigo.geneontology.org/amigo/term/GO:1904018	HIF1A PLCG1
0.146844019554448	1	19	370940988835726	GO:1905564 Positive regulation of vascular endothelial cell proliferation	https://amigo.geneontology.org/amigo/term/GO:1905564	PLCG1
0.146844019554448	1	18	391548821548822	GO:1905962 Glutamatergic neuron differentiation	https://amigo.geneontology.org/amigo/term/GO:1905962	RHO
0.146844019554448	1	20	352393939393939	GO:2000434 Regulation of protein neddylation	https://amigo.geneontology.org/amigo/term/GO:2000434	HIF1A
0.146844019554448	1	18	391548821548822	GO:2000696 Regulation of epithelial cell differentiation involved in kidney development	https://amigo.geneontology.org/amigo/term/GO:2000696	FAT4
0.146844019554448	1	20	352393939393939	GO:2001044 Regulation of integrin-mediated signaling pathway	https://amigo.geneontology.org/amigo/term/GO:2001044	NID1
0.148728445863955	1	22	320358126721763	GO:0006144 Purine nucleobase metabolic process	https://amigo.geneontology.org/amigo/term/GO:0006144	XDH
0.148728445863955	2	189	745807279140613	GO:0007009 Plasma membrane organization	https://amigo.geneontology.org/amigo/term/GO:0007009	MYRF FAT4
0.148728445863955	1	22	320358126721763	GO:0007190 Activation of adenylate cyclase activity	https://amigo.geneontology.org/amigo/term/GO:0007190	GNAS
0.148728445863955	7	2165	22787598852264	GO:0009888 Tissue development	https://amigo.geneontology.org/amigo/term/GO:0009888	SVEP1 GNAS XDH HIF1A GRHL1 PTPRQ FAT4
0.148728445863955	5	1250	281915151515152	GO:0010629 Negative regulation of gene expression	https://amigo.geneontology.org/amigo/term/GO:0010629	ZNFX1 XDH TDRD9 KDM4A HIF1A
0.148728445863955	1	21	335613275613276	GO:0018200 Peptidyl-glutamic acid modification	https://amigo.geneontology.org/amigo/term/GO:0018200	TTLL1
0.148728445863955	1	21	335613275613276	GO:0021692 Cerebellar purkinje cell layer morphogenesis	https://amigo.geneontology.org/amigo/term/GO:0021692	TTLL1
0.148728445863955	1	22	320358126721763	GO:0030449 Regulation of complement activation	https://amigo.geneontology.org/amigo/term/GO:0030449	SVEP1
0.148728445863955	1	21	335613275613276	GO:0034587 Pirna processing	https://amigo.geneontology.org/amigo/term/GO:0034587	TDRD9
0.148728445863955	1	22	320358126721763	GO:0036303 Lymph vessel morphogenesis	https://amigo.geneontology.org/amigo/term/GO:0036303	SVEP1
0.148728445863955	3	481	43957663957664	GO:0042060 Wound healing	https://amigo.geneontology.org/amigo/term/GO:0042060	GNAS HIF1A SVEP1
0.148728445863955	2	191	737997778835475	GO:0050796 Regulation of insulin secretion	https://amigo.geneontology.org/amigo/term/GO:0050796	HIF1A GNAS
0.148728445863955	3	478	442335488779003	GO:0051960 Regulation of nervous system development	https://amigo.geneontology.org/amigo/term/GO:0051960	KDM4A HIF1A MYRF
0.148728445863955	1	21	335613275613276	GO:0060749 Mammary gland alveolus development	https://amigo.geneontology.org/amigo/term/GO:0060749	HIF1A
0.148728445863955	1	21	335613275613276	GO:0061099 Negative regulation of protein tyrosine kinase activity	https://amigo.geneontology.org/amigo/term/GO:0061099	SNX6
0.148728445863955	1	21	335613275613276	GO:0061377 Mammary gland lobule development	https://amigo.geneontology.org/amigo/term/GO:0061377	HIF1A
0.148728445863955	1	21	335613275613276	GO:0070242 Thymocyte apoptotic process	https://amigo.geneontology.org/amigo/term/GO:0070242	HIF1A
0.148728445863955	1	22	320358126721763	GO:0072662 Protein localization to peroxisome	https://amigo.geneontology.org/amigo/term/GO:0072662	USP9X
0.148728445863955	1	22	320358126721763	GO:0072663 Establishment of protein localization to peroxisome	https://amigo.geneontology.org/amigo/term/GO:0072663	USP9X
0.148728445863955	1	22	320358126721763	GO:0090670 Rna localization to cajal body	https://amigo.geneontology.org/amigo/term/GO:0090670	NOP10
0.148728445863955	1	22	320358126721763	GO:0090671 Telomerase rna localization to cajal body	https://amigo.geneontology.org/amigo/term/GO:0090671	NOP10
0.148728445863955	1	22	320358126721763	GO:0090672 Telomerase rna localization	https://amigo.geneontology.org/amigo/term/GO:0090672	NOP10
0.148728445863955	1	22	320358126721763	GO:0090685 Rna localization to nucleus	https://amigo.geneontology.org/amigo/term/GO:0090685	NOP10
0.148728445863955	2	191	737997778835475	GO:1901292 Nucleoside phosphate catabolic process	https://amigo.geneontology.org/amigo/term/GO:1901292	HIF1A XDH
0.151118771659075	2	197	71552068912475	GO:0007219 Notch signaling pathway	https://amigo.geneontology.org/amigo/term/GO:0007219	DTX3 FAT4
0.151118771659075	2	198	711906948270585	GO:0016241 Regulation of macroautophagy	https://amigo.geneontology.org/amigo/term/GO:0016241	HIF1A SNX6
0.151118771659075	1	23	306429512516469	GO:0046128 Purine ribonucleoside metabolic process	https://amigo.geneontology.org/amigo/term/GO:0046128	XDH
0.151118771659075	9	3229	196441341253977	GO:0048513 Animal organ development	https://amigo.geneontology.org/amigo/term/GO:0048513	GNAS TTLL1 HIF1A NID1 GRHL1 PTPRQ XDH RHO FAT4
0.151118771659075	1	23	306429512516469	GO:0071379 Cellular response to prostaglandin stimulus	https://amigo.geneontology.org/amigo/term/GO:0071379	GNAS
0.151118771659075	1	23	306429512516469	GO:0072202 Cell differentiation involved in metanephros development	https://amigo.geneontology.org/amigo/term/GO:0072202	FAT4
0.151118771659075	1	23	306429512516469	GO:0072234 Metanephric nephron tubule development	https://amigo.geneontology.org/amigo/term/GO:0072234	FAT4
0.151118771659075	3	491	430623958526199	GO:0072594 Establishment of protein localization to organelle	https://amigo.geneontology.org/amigo/term/GO:0072594	HUWE1 SPCS2 USP9X
0.151118771659075	1	23	306429512516469	GO:1900407 Regulation of cellular response to oxidative stress	https://amigo.geneontology.org/amigo/term/GO:1900407	OXR1
0.151515198947665	2	199	708329526419979	GO:0045814 Negative regulation of gene expression epigenetic	https://amigo.geneontology.org/amigo/term/GO:0045814	ZNFX1 TDRD9
0.152019460845215	1	24	293661616161616	GO:0003299 Muscle hypertrophy in response to stress	https://amigo.geneontology.org/amigo/term/GO:0003299	KDM4A
0.152019460845215	1	24	293661616161616	GO:0014887 Cardiac muscle adaptation	https://amigo.geneontology.org/amigo/term/GO:0014887	KDM4A
0.152019460845215	1	24	293661616161616	GO:0014898 Cardiac muscle hypertrophy in response to stress	https://amigo.geneontology.org/amigo/term/GO:0014898	KDM4A
0.152019460845215	1	24	293661616161616	GO:0015919 Peroxisomal membrane transport	https://amigo.geneontology.org/amigo/term/GO:0015919	USP9X
0.152019460845215	3	496	426282991202346	GO:0031329 Regulation of cellular catabolic process	https://amigo.geneontology.org/amigo/term/GO:0031329	HIF1A KDM4A SNX6
0.152019460845215	1	24	293661616161616	GO:0034656 Nucleobase-containing small molecule catabolic process	https://amigo.geneontology.org/amigo/term/GO:0034656	XDH
0.152019460845215	1	24	293661616161616	GO:0035162 Embryonic hemopoiesis	https://amigo.geneontology.org/amigo/term/GO:0035162	HIF1A
0.152019460845215	1	24	293661616161616	GO:0043574 Peroxisomal transport	https://amigo.geneontology.org/amigo/term/GO:0043574	USP9X
0.152019460845215	1	24	293661616161616	GO:0046885 Regulation of hormone biosynthetic process	https://amigo.geneontology.org/amigo/term/GO:0046885	HIF1A
0.152019460845215	8	2719	207366790375249	GO:0048584 Positive regulation of response to stimulus	https://amigo.geneontology.org/amigo/term/GO:0048584	MCF2L SVEP1 HIF1A USP9X XDH PLCG1 ZNFX1 NID1
0.152019460845215	1	24	293661616161616	GO:0050961 Detection of temperature stimulus involved in sensory perception	https://amigo.geneontology.org/amigo/term/GO:0050961	RHO
0.152850445683506	2	205	68759793052476	GO:0007156 Homophilic cell adhesion via plasma membrane adhesion molecules	https://amigo.geneontology.org/amigo/term/GO:0007156	HMCN2 FAT4
0.152850445683506	1	25	281915151515152	GO:0009162 Deoxyribonucleoside monophosphate metabolic process	https://amigo.geneontology.org/amigo/term/GO:0009162	XDH
0.152850445683506	1	25	281915151515152	GO:0021533 Cell differentiation in hindbrain	https://amigo.geneontology.org/amigo/term/GO:0021533	TTLL1
0.152850445683506	1	25	281915151515152	GO:0030502 Negative regulation of bone mineralization	https://amigo.geneontology.org/amigo/term/GO:0030502	HIF1A
0.152850445683506	1	25	281915151515152	GO:0030813 Positive regulation of nucleotide catabolic process	https://amigo.geneontology.org/amigo/term/GO:0030813	HIF1A
0.152850445683506	1	25	281915151515152	GO:0033123 Positive regulation of purine nucleotide catabolic process	https://amigo.geneontology.org/amigo/term/GO:0033123	HIF1A
0.152850445683506	1	25	281915151515152	GO:0033762 Response to glucagon	https://amigo.geneontology.org/amigo/term/GO:0033762	GNAS
0.152850445683506	1	25	281915151515152	GO:0045821 Positive regulation of glycolytic process	https://amigo.geneontology.org/amigo/term/GO:0045821	HIF1A
0.152850445683506	1	25	281915151515152	GO:0046033 Amp metabolic process	https://amigo.geneontology.org/amigo/term/GO:0046033	XDH
0.152850445683506	1	25	281915151515152	GO:0060571 Morphogenesis of an epithelial fold	https://amigo.geneontology.org/amigo/term/GO:0060571	HIF1A
0.152850445683506	1	25	281915151515152	GO:0071880 Adenylate cyclase-activating adrenergic receptor signaling pathway	https://amigo.geneontology.org/amigo/term/GO:0071880	GNAS
0.152850445683506	1	25	281915151515152	GO:0072170 Metanephric tubule development	https://amigo.geneontology.org/amigo/term/GO:0072170	FAT4
0.154330039025421	1	27	261032547699214	GO:0002070 Epithelial cell maturation	https://amigo.geneontology.org/amigo/term/GO:0002070	HIF1A
0.154330039025421	1	26	271072261072261	GO:0003091 Renal water homeostasis	https://amigo.geneontology.org/amigo/term/GO:0003091	GNAS
0.154330039025421	1	26	271072261072261	GO:0006312 Mitotic recombination	https://amigo.geneontology.org/amigo/term/GO:0006312	TEP1
0.154330039025421	6	1787	23663834766241	GO:0006508 Proteolysis	https://amigo.geneontology.org/amigo/term/GO:0006508	HUWE1 SPCS2 MYRF PSMD2 XDH USP9X
0.154330039025421	2	215	655616631430585	GO:0007623 Circadian rhythm	https://amigo.geneontology.org/amigo/term/GO:0007623	HUWE1 USP9X
0.154330039025421	1	27	261032547699214	GO:0016048 Detection of temperature stimulus	https://amigo.geneontology.org/amigo/term/GO:0016048	RHO
0.154330039025421	1	27	261032547699214	GO:0016540 Protein autoprocessing	https://amigo.geneontology.org/amigo/term/GO:0016540	MYRF
0.154330039025421	2	214	658680260549419	GO:0021543 Pallium development	https://amigo.geneontology.org/amigo/term/GO:0021543	HIF1A FAT4
0.154330039025421	1	27	261032547699214	GO:0022010 Central nervous system myelination	https://amigo.geneontology.org/amigo/term/GO:0022010	MYRF
0.154330039025421	1	27	261032547699214	GO:0032291 Axon ensheathment in central nervous system	https://amigo.geneontology.org/amigo/term/GO:0032291	MYRF
0.154330039025421	1	26	271072261072261	GO:0036480 Neuron intrinsic apoptotic signaling pathway in response to oxidative stress	https://amigo.geneontology.org/amigo/term/GO:0036480	HIF1A
0.154330039025421	1	26	271072261072261	GO:0042059 Negative regulation of epidermal growth factor receptor signaling pathway	https://amigo.geneontology.org/amigo/term/GO:0042059	SNX6
0.154330039025421	1	27	261032547699214	GO:0045686 Negative regulation of glial cell differentiation	https://amigo.geneontology.org/amigo/term/GO:0045686	KDM4A
0.154330039025421	1	26	271072261072261	GO:0046716 Muscle cell cellular homeostasis	https://amigo.geneontology.org/amigo/term/GO:0046716	HIF1A
0.154330039025421	2	214	658680260549419	GO:0048839 Inner ear development	https://amigo.geneontology.org/amigo/term/GO:0048839	PTPRQ FAT4
0.154330039025421	2	213	661772656138853	GO:0050679 Positive regulation of epithelial cell proliferation	https://amigo.geneontology.org/amigo/term/GO:0050679	HIF1A PLCG1
0.154330039025421	6	1776	238104013104013	GO:0065009 Regulation of molecular function	https://amigo.geneontology.org/amigo/term/GO:0065009	NVL XDH HIF1A USP9X SNX6 GNAS
0.154330039025421	1	26	271072261072261	GO:0070233 Negative regulation of t cell apoptotic process	https://amigo.geneontology.org/amigo/term/GO:0070233	HIF1A
0.154330039025421	1	26	271072261072261	GO:0072243 Metanephric nephron epithelium development	https://amigo.geneontology.org/amigo/term/GO:0072243	FAT4
0.154330039025421	1	27	261032547699214	GO:0101023 Vascular endothelial cell proliferation	https://amigo.geneontology.org/amigo/term/GO:0101023	PLCG1
0.154330039025421	1	27	261032547699214	GO:1900746 Regulation of vascular endothelial growth factor signaling pathway	https://amigo.geneontology.org/amigo/term/GO:1900746	XDH
0.154330039025421	1	27	261032547699214	GO:1901658 Glycosyl compound catabolic process	https://amigo.geneontology.org/amigo/term/GO:1901658	XDH
0.154330039025421	1	27	261032547699214	GO:1905562 Regulation of vascular endothelial cell proliferation	https://amigo.geneontology.org/amigo/term/GO:1905562	PLCG1
0.154330039025421	1	26	271072261072261	GO:2000273 Positive regulation of signaling receptor activity	https://amigo.geneontology.org/amigo/term/GO:2000273	HIF1A
0.156133943186787	2	218	646594384209063	GO:0007179 Transforming growth factor beta receptor signaling pathway	https://amigo.geneontology.org/amigo/term/GO:0007179	SNX6 USP9X
0.156935129656226	1	30	234929292929293	GO:0001945 Lymph vessel development	https://amigo.geneontology.org/amigo/term/GO:0001945	SVEP1
0.156935129656226	2	228	618234981392876	GO:0002791 Regulation of peptide secretion	https://amigo.geneontology.org/amigo/term/GO:0002791	HIF1A GNAS
0.156935129656226	1	28	251709956709957	GO:0007141 Male meiosis i	https://amigo.geneontology.org/amigo/term/GO:0007141	TDRD9
0.156935129656226	1	30	234929292929293	GO:0009264 Deoxyribonucleotide catabolic process	https://amigo.geneontology.org/amigo/term/GO:0009264	XDH
0.156935129656226	1	30	234929292929293	GO:0010039 Response to iron ion	https://amigo.geneontology.org/amigo/term/GO:0010039	HIF1A
0.156935129656226	1	29	243030303030303	GO:0021697 Cerebellar cortex formation	https://amigo.geneontology.org/amigo/term/GO:0021697	TTLL1
0.156935129656226	2	225	626478114478114	GO:0030073 Insulin secretion	https://amigo.geneontology.org/amigo/term/GO:0030073	HIF1A GNAS
0.156935129656226	1	28	251709956709957	GO:0032770 Positive regulation of monooxygenase activity	https://amigo.geneontology.org/amigo/term/GO:0032770	HIF1A
0.156935129656226	1	30	234929292929293	GO:0034643 Establishment of mitochondrion localization microtubule-mediated	https://amigo.geneontology.org/amigo/term/GO:0034643	HIF1A
0.156935129656226	1	30	234929292929293	GO:0034695 Response to prostaglandin e	https://amigo.geneontology.org/amigo/term/GO:0034695	GNAS
0.156935129656226	4	923	305433533602548	GO:0035239 Tube morphogenesis	https://amigo.geneontology.org/amigo/term/GO:0035239	HIF1A PLCG1 XDH FAT4
0.156935129656226	1	29	243030303030303	GO:0035902 Response to immobilization stress	https://amigo.geneontology.org/amigo/term/GO:0035902	MYRF
0.156935129656226	1	29	243030303030303	GO:0038095 Fc-epsilon receptor signaling pathway	https://amigo.geneontology.org/amigo/term/GO:0038095	PLCG1
0.156935129656226	1	28	251709956709957	GO:0042278 Purine nucleoside metabolic process	https://amigo.geneontology.org/amigo/term/GO:0042278	XDH
0.156935129656226	1	30	234929292929293	GO:0043931 Ossification involved in bone maturation	https://amigo.geneontology.org/amigo/term/GO:0043931	FAT4
0.156935129656226	1	29	243030303030303	GO:0045762 Positive regulation of adenylate cyclase activity	https://amigo.geneontology.org/amigo/term/GO:0045762	GNAS
0.156935129656226	1	30	234929292929293	GO:0046037 Gmp metabolic process	https://amigo.geneontology.org/amigo/term/GO:0046037	XDH
0.156935129656226	1	30	234929292929293	GO:0046386 Deoxyribose phosphate catabolic process	https://amigo.geneontology.org/amigo/term/GO:0046386	XDH
0.156935129656226	1	30	234929292929293	GO:0047497 Mitochondrion transport along microtubule	https://amigo.geneontology.org/amigo/term/GO:0047497	HIF1A
0.156935129656226	1	30	234929292929293	GO:0048710 Regulation of astrocyte differentiation	https://amigo.geneontology.org/amigo/term/GO:0048710	KDM4A
0.156935129656226	1	29	243030303030303	GO:0048714 Positive regulation of oligodendrocyte differentiation	https://amigo.geneontology.org/amigo/term/GO:0048714	MYRF
0.156935129656226	1	30	234929292929293	GO:0050951 Sensory perception of temperature stimulus	https://amigo.geneontology.org/amigo/term/GO:0050951	RHO
0.156935129656226	9	3355	189063812491532	GO:0051239 Regulation of multicellular organismal process	https://amigo.geneontology.org/amigo/term/GO:0051239	PLCG1 HIF1A XDH KDM4A MYRF GRHL1 SVEP1 FAT4 GNAS
0.156935129656226	2	228	618234981392876	GO:0060348 Bone development	https://amigo.geneontology.org/amigo/term/GO:0060348	GNAS FAT4
0.156935129656226	1	29	243030303030303	GO:0060575 Intestinal epithelial cell differentiation	https://amigo.geneontology.org/amigo/term/GO:0060575	HIF1A
0.156935129656226	1	28	251709956709957	GO:0071800 Podosome assembly	https://amigo.geneontology.org/amigo/term/GO:0071800	RHO
0.156935129656226	1	29	243030303030303	GO:0072207 Metanephric epithelium development	https://amigo.geneontology.org/amigo/term/GO:0072207	FAT4
0.156935129656226	2	228	618234981392876	GO:0090087 Regulation of peptide transport	https://amigo.geneontology.org/amigo/term/GO:0090087	HIF1A GNAS
0.156935129656226	2	225	626478114478114	GO:0090276 Regulation of peptide hormone secretion	https://amigo.geneontology.org/amigo/term/GO:0090276	HIF1A GNAS
0.156935129656226	2	226	623706087422902	GO:0099111 Microtubule-based transport	https://amigo.geneontology.org/amigo/term/GO:0099111	TTLL1 HIF1A
0.156935129656226	2	228	618234981392876	GO:0140013 Meiotic nuclear division	https://amigo.geneontology.org/amigo/term/GO:0140013	SHOC1 TDRD9
0.156935129656226	1	29	243030303030303	GO:1902547 Regulation of cellular response to vascular endothelial growth factor stimulus	https://amigo.geneontology.org/amigo/term/GO:1902547	XDH
0.156935129656226	1	29	243030303030303	GO:2000353 Positive regulation of endothelial cell apoptotic process	https://amigo.geneontology.org/amigo/term/GO:2000353	PLCG1
0.157821160663477	4	941	299591021801436	GO:0006325 Chromatin organization	https://amigo.geneontology.org/amigo/term/GO:0006325	KDM4A ZNFX1 HUWE1 TDRD9
0.157821160663477	1	31	227350928641251	GO:0007130 Synaptonemal complex assembly	https://amigo.geneontology.org/amigo/term/GO:0007130	SHOC1
0.157821160663477	1	31	227350928641251	GO:0009119 Ribonucleoside metabolic process	https://amigo.geneontology.org/amigo/term/GO:0009119	XDH
0.157821160663477	1	31	227350928641251	GO:0016226 Iron-sulfur cluster assembly	https://amigo.geneontology.org/amigo/term/GO:0016226	XDH
0.157821160663477	1	31	227350928641251	GO:0021680 Cerebellar purkinje cell layer development	https://amigo.geneontology.org/amigo/term/GO:0021680	TTLL1
0.157821160663477	1	31	227350928641251	GO:0030262 Apoptotic nuclear changes	https://amigo.geneontology.org/amigo/term/GO:0030262	KDM4A
0.157821160663477	1	31	227350928641251	GO:0031163 Metallo-sulfur cluster assembly	https://amigo.geneontology.org/amigo/term/GO:0031163	XDH
0.157821160663477	2	231	610205955660501	GO:0045216 Cell-cell junction organization	https://amigo.geneontology.org/amigo/term/GO:0045216	GRHL1 SVEP1
0.157821160663477	1	31	227350928641251	GO:1901185 Negative regulation of erbb signaling pathway	https://amigo.geneontology.org/amigo/term/GO:1901185	SNX6
0.157821160663477	1	31	227350928641251	GO:1902176 Negative regulation of oxidative stress-induced intrinsic apoptotic signaling pathway	https://amigo.geneontology.org/amigo/term/GO:1902176	HIF1A
0.157821160663477	1	31	227350928641251	GO:2000272 Negative regulation of signaling receptor activity	https://amigo.geneontology.org/amigo/term/GO:2000272	SNX6
0.158438534094642	3	556	380281229561805	GO:0001501 Skeletal system development	https://amigo.geneontology.org/amigo/term/GO:0001501	GNAS HIF1A FAT4
0.158438534094642	2	238	592258721670486	GO:0001667 Ameboidal-type cell migration	https://amigo.geneontology.org/amigo/term/GO:0001667	PLCG1 HIF1A
0.158438534094642	1	33	213572084481175	GO:0001782 B cell homeostasis	https://amigo.geneontology.org/amigo/term/GO:0001782	HIF1A
0.158438534094642	1	33	213572084481175	GO:0006921 Cellular component disassembly involved in execution phase of apoptosis	https://amigo.geneontology.org/amigo/term/GO:0006921	KDM4A
0.158438534094642	1	32	220246212121212	GO:0007288 Sperm axoneme assembly	https://amigo.geneontology.org/amigo/term/GO:0007288	TTLL1
0.158438534094642	1	34	20729055258467	GO:0007628 Adult walking behavior	https://amigo.geneontology.org/amigo/term/GO:0007628	OXR1
0.158438534094642	1	34	20729055258467	GO:0008053 Mitochondrial fusion	https://amigo.geneontology.org/amigo/term/GO:0008053	HUWE1
0.158438534094642	8	2888	195232099387224	GO:0009056 Catabolic process	https://amigo.geneontology.org/amigo/term/GO:0009056	HUWE1 XDH PSMD2 HIF1A PLCG1 KDM4A USP9X SNX6
0.158438534094642	1	34	20729055258467	GO:0009584 Detection of visible light	https://amigo.geneontology.org/amigo/term/GO:0009584	RHO
0.158438534094642	1	32	220246212121212	GO:0010575 Positive regulation of vascular endothelial growth factor production	https://amigo.geneontology.org/amigo/term/GO:0010575	HIF1A
0.158438534094642	8	2885	195435113702011	GO:0010605 Negative regulation of macromolecule metabolic process	https://amigo.geneontology.org/amigo/term/GO:0010605	ZNFX1 KDM4A SNX6 XDH TDRD9 OXR1 HIF1A USP9X
0.158438534094642	1	32	220246212121212	GO:0014850 Response to muscle activity	https://amigo.geneontology.org/amigo/term/GO:0014850	HIF1A
0.158438534094642	1	32	220246212121212	GO:0030947 Regulation of vascular endothelial growth factor receptor signaling pathway	https://amigo.geneontology.org/amigo/term/GO:0030947	HIF1A
0.158438534094642	1	34	20729055258467	GO:0031281 Positive regulation of cyclase activity	https://amigo.geneontology.org/amigo/term/GO:0031281	GNAS
0.158438534094642	1	34	20729055258467	GO:0031646 Positive regulation of nervous system process	https://amigo.geneontology.org/amigo/term/GO:0031646	MYRF
0.158438534094642	4	952	296129360835243	GO:0032880 Regulation of protein localization	https://amigo.geneontology.org/amigo/term/GO:0032880	HUWE1 NVL HIF1A GNAS
0.158438534094642	1	33	213572084481175	GO:0035774 Positive regulation of insulin secretion involved in cellular response to glucose stimulus	https://amigo.geneontology.org/amigo/term/GO:0035774	HIF1A
0.158438534094642	2	239	589780651705338	GO:0043542 Endothelial cell migration	https://amigo.geneontology.org/amigo/term/GO:0043542	PLCG1 HIF1A
0.158438534094642	2	242	582469321312297	GO:0043583 Ear development	https://amigo.geneontology.org/amigo/term/GO:0043583	PTPRQ FAT4
0.158438534094642	1	34	20729055258467	GO:0045116 Protein neddylation	https://amigo.geneontology.org/amigo/term/GO:0045116	HIF1A
0.158438534094642	6	1860	227350928641251	GO:0045184 Establishment of protein localization	https://amigo.geneontology.org/amigo/term/GO:0045184	HUWE1 SPCS2 USP9X HIF1A SNX6 GNAS
0.158438534094642	4	954	295508544565148	GO:0045597 Positive regulation of cell differentiation	https://amigo.geneontology.org/amigo/term/GO:0045597	HIF1A KDM4A MYRF NID1
0.158438534094642	2	236	597277863379558	GO:0045926 Negative regulation of growth	https://amigo.geneontology.org/amigo/term/GO:0045926	HIF1A GNAS
0.158438534094642	2	235	599819471308833	GO:0051098 Regulation of binding	https://amigo.geneontology.org/amigo/term/GO:0051098	NVL USP9X
0.158438534094642	1	34	20729055258467	GO:0051349 Positive regulation of lyase activity	https://amigo.geneontology.org/amigo/term/GO:0051349	GNAS
0.158438534094642	1	32	220246212121212	GO:0065002 Intracellular protein transmembrane transport	https://amigo.geneontology.org/amigo/term/GO:0065002	USP9X
0.158438534094642	1	34	20729055258467	GO:0070168 Negative regulation of biomineral tissue development	https://amigo.geneontology.org/amigo/term/GO:0070168	HIF1A
0.158438534094642	1	34	20729055258467	GO:0070193 Synaptonemal complex organization	https://amigo.geneontology.org/amigo/term/GO:0070193	SHOC1
0.158438534094642	3	570	370940988835726	GO:0070201 Regulation of establishment of protein localization	https://amigo.geneontology.org/amigo/term/GO:0070201	HUWE1 HIF1A GNAS
0.158438534094642	1	33	213572084481175	GO:0070536 Protein k63-linked deubiquitination	https://amigo.geneontology.org/amigo/term/GO:0070536	USP9X
0.158438534094642	1	33	213572084481175	GO:0070977 Bone maturation	https://amigo.geneontology.org/amigo/term/GO:0070977	FAT4
0.158438534094642	1	34	20729055258467	GO:0071634 Regulation of transforming growth factor beta production	https://amigo.geneontology.org/amigo/term/GO:0071634	HIF1A
0.158438534094642	1	34	20729055258467	GO:0071875 Adrenergic receptor signaling pathway	https://amigo.geneontology.org/amigo/term/GO:0071875	GNAS
0.158438534094642	2	245	575337043908473	GO:0072593 Reactive oxygen species metabolic process	https://amigo.geneontology.org/amigo/term/GO:0072593	XDH HIF1A
0.158438534094642	1	34	20729055258467	GO:0090594 Inflammatory response to wounding	https://amigo.geneontology.org/amigo/term/GO:0090594	HIF1A
0.158438534094642	1	33	213572084481175	GO:1900017 Positive regulation of cytokine production involved in inflammatory response	https://amigo.geneontology.org/amigo/term/GO:1900017	HIF1A
0.158438534094642	1	34	20729055258467	GO:1900745 Positive regulation of p38mapk cascade	https://amigo.geneontology.org/amigo/term/GO:1900745	XDH
0.158438534094642	1	32	220246212121212	GO:1903715 Regulation of aerobic respiration	https://amigo.geneontology.org/amigo/term/GO:1903715	HIF1A
0.159574296075265	4	973	289738079666137	GO:0032446 Protein modification by small protein conjugation	https://amigo.geneontology.org/amigo/term/GO:0032446	HUWE1 DTX3 HIF1A USP9X
0.160831465684885	2	248	568377321603128	GO:0006364 Rrna processing	https://amigo.geneontology.org/amigo/term/GO:0006364	NOP10 NVL
0.160831465684885	7	2406	205050505050505	GO:0010558 Negative regulation of macromolecule biosynthetic process	https://amigo.geneontology.org/amigo/term/GO:0010558	ZNFX1 KDM4A SNX6 XDH TDRD9 HIF1A USP9X
0.160831465684885	1	35	201367965367965	GO:0010574 Regulation of vascular endothelial growth factor production	https://amigo.geneontology.org/amigo/term/GO:0010574	HIF1A
0.160831465684885	1	35	201367965367965	GO:0018198 Peptidyl-cysteine modification	https://amigo.geneontology.org/amigo/term/GO:0018198	OXR1
0.160831465684885	1	35	201367965367965	GO:0050891 Multicellular organismal-level water homeostasis	https://amigo.geneontology.org/amigo/term/GO:0050891	GNAS
0.160831465684885	1	35	201367965367965	GO:0061436 Establishment of skin barrier	https://amigo.geneontology.org/amigo/term/GO:0061436	GRHL1
0.161297159984297	2	250	563830303030303	GO:1903046 Meiotic cell cycle process	https://amigo.geneontology.org/amigo/term/GO:1903046	SHOC1 TDRD9
0.163957206299635	1	36	195774410774411	GO:0002068 Glandular epithelial cell development	https://amigo.geneontology.org/amigo/term/GO:0002068	HIF1A
0.163957206299635	1	36	195774410774411	GO:1902882 Regulation of response to oxidative stress	https://amigo.geneontology.org/amigo/term/GO:1902882	OXR1
0.165377042095332	1	38	185470494417863	GO:0000154 Rrna modification	https://amigo.geneontology.org/amigo/term/GO:0000154	NOP10
0.165377042095332	2	259	544237744237744	GO:0001933 Negative regulation of protein phosphorylation	https://amigo.geneontology.org/amigo/term/GO:0001933	XDH SNX6
0.165377042095332	1	38	185470494417863	GO:0002052 Positive regulation of neuroblast proliferation	https://amigo.geneontology.org/amigo/term/GO:0002052	HIF1A
0.165377042095332	2	260	542144522144522	GO:0007160 Cell-matrix adhesion	https://amigo.geneontology.org/amigo/term/GO:0007160	NID1 SVEP1
0.165377042095332	2	261	54006734006734	GO:0007596 Blood coagulation	https://amigo.geneontology.org/amigo/term/GO:0007596	GNAS SVEP1
0.165377042095332	1	37	19048321048321	GO:0009112 Nucleobase metabolic process	https://amigo.geneontology.org/amigo/term/GO:0009112	XDH
0.165377042095332	1	38	185470494417863	GO:0010526 Retrotransposon silencing	https://amigo.geneontology.org/amigo/term/GO:0010526	TDRD9
0.165377042095332	1	37	19048321048321	GO:0016180 Snrna processing	https://amigo.geneontology.org/amigo/term/GO:0016180	NOP10
0.165377042095332	7	2450	201367965367965	GO:0031327 Negative regulation of cellular biosynthetic process	https://amigo.geneontology.org/amigo/term/GO:0031327	ZNFX1 KDM4A SNX6 XDH TDRD9 HIF1A USP9X
0.165377042095332	1	38	185470494417863	GO:0032768 Regulation of monooxygenase activity	https://amigo.geneontology.org/amigo/term/GO:0032768	HIF1A
0.165377042095332	1	38	185470494417863	GO:0034694 Response to prostaglandin	https://amigo.geneontology.org/amigo/term/GO:0034694	GNAS
0.165377042095332	1	38	185470494417863	GO:0045648 Positive regulation of erythrocyte differentiation	https://amigo.geneontology.org/amigo/term/GO:0045648	HIF1A
0.165377042095332	1	38	185470494417863	GO:0045745 Positive regulation of g protein-coupled receptor signaling pathway	https://amigo.geneontology.org/amigo/term/GO:0045745	HIF1A
0.165377042095332	1	37	19048321048321	GO:0048799 Animal organ maturation	https://amigo.geneontology.org/amigo/term/GO:0048799	FAT4
0.165377042095332	2	257	548473057422474	GO:0050769 Positive regulation of neurogenesis	https://amigo.geneontology.org/amigo/term/GO:0050769	HIF1A MYRF
0.165377042095332	5	1449	243198025806721	GO:0051094 Positive regulation of developmental process	https://amigo.geneontology.org/amigo/term/GO:0051094	HIF1A PLCG1 KDM4A MYRF NID1
0.165377042095332	1	38	185470494417863	GO:0051654 Establishment of mitochondrion localization	https://amigo.geneontology.org/amigo/term/GO:0051654	HIF1A
0.165377042095332	1	38	185470494417863	GO:0070229 Negative regulation of lymphocyte apoptotic process	https://amigo.geneontology.org/amigo/term/GO:0070229	HIF1A
0.165377042095332	1	37	19048321048321	GO:0071604 Transforming growth factor beta production	https://amigo.geneontology.org/amigo/term/GO:0071604	HIF1A
0.165377042095332	1	37	19048321048321	GO:1901524 Regulation of mitophagy	https://amigo.geneontology.org/amigo/term/GO:1901524	HIF1A
0.165377042095332	2	261	54006734006734	GO:1903320 Regulation of protein modification by small protein conjugation or removal	https://amigo.geneontology.org/amigo/term/GO:1903320	HUWE1 HIF1A
0.165377042095332	1	37	19048321048321	GO:1903580 Positive regulation of atp metabolic process	https://amigo.geneontology.org/amigo/term/GO:1903580	HIF1A
0.165377042095332	1	37	19048321048321	GO:1903955 Positive regulation of protein targeting to mitochondrion	https://amigo.geneontology.org/amigo/term/GO:1903955	HUWE1
0.16609772989399	2	262	538006014341892	GO:0016485 Protein processing	https://amigo.geneontology.org/amigo/term/GO:0016485	SPCS2 MYRF
0.167270333837097	1	39	180714840714841	GO:0032350 Regulation of hormone metabolic process	https://amigo.geneontology.org/amigo/term/GO:0032350	HIF1A
0.167270333837097	1	39	180714840714841	GO:0050974 Detection of mechanical stimulus involved in sensory perception	https://amigo.geneontology.org/amigo/term/GO:0050974	PTPRQ
0.167270333837097	1	39	180714840714841	GO:0051353 Positive regulation of oxidoreductase activity	https://amigo.geneontology.org/amigo/term/GO:0051353	HIF1A
0.167270333837097	1	39	180714840714841	GO:0071711 Basement membrane organization	https://amigo.geneontology.org/amigo/term/GO:0071711	NID1
0.167272139974504	1	40	17619696969697	GO:0007031 Peroxisome organization	https://amigo.geneontology.org/amigo/term/GO:0007031	USP9X
0.167272139974504	2	268	525961103573044	GO:0007599 Hemostasis	https://amigo.geneontology.org/amigo/term/GO:0007599	GNAS SVEP1
0.167272139974504	7	2477	199172997638884	GO:0009890 Negative regulation of biosynthetic process	https://amigo.geneontology.org/amigo/term/GO:0009890	ZNFX1 KDM4A SNX6 XDH TDRD9 HIF1A USP9X
0.167272139974504	2	266	529915698336751	GO:0009913 Epidermal cell differentiation	https://amigo.geneontology.org/amigo/term/GO:0009913	GRHL1 PTPRQ
0.167272139974504	1	40	17619696969697	GO:0021696 Cerebellar cortex morphogenesis	https://amigo.geneontology.org/amigo/term/GO:0021696	TTLL1
0.167272139974504	1	40	17619696969697	GO:0032197 Retrotransposition	https://amigo.geneontology.org/amigo/term/GO:0032197	TDRD9
0.167272139974504	1	40	17619696969697	GO:0045616 Regulation of keratinocyte differentiation	https://amigo.geneontology.org/amigo/term/GO:0045616	GRHL1
0.167272139974504	1	40	17619696969697	GO:0045981 Positive regulation of nucleotide metabolic process	https://amigo.geneontology.org/amigo/term/GO:0045981	HIF1A
0.167272139974504	11	4704	164810090702948	GO:0048583 Regulation of response to stimulus	https://amigo.geneontology.org/amigo/term/GO:0048583	MCF2L SVEP1 HIF1A USP9X SNX6 XDH PLCG1 ZNFX1 OXR1 NID1 GNAS
0.167272139974504	3	613	344920658460626	GO:0048667 Cell morphogenesis involved in neuron differentiation	https://amigo.geneontology.org/amigo/term/GO:0048667	PTPRQ HMCN2 USP9X
0.167272139974504	2	268	525961103573044	GO:0050817 Coagulation	https://amigo.geneontology.org/amigo/term/GO:0050817	GNAS SVEP1
0.167272139974504	1	40	17619696969697	GO:0060122 Inner ear receptor cell stereocilium organization	https://amigo.geneontology.org/amigo/term/GO:0060122	FAT4
0.167272139974504	1	40	17619696969697	GO:1900544 Positive regulation of purine nucleotide metabolic process	https://amigo.geneontology.org/amigo/term/GO:1900544	HIF1A
0.167272139974504	2	266	529915698336751	GO:1901873 Regulation of post-translational protein modification	https://amigo.geneontology.org/amigo/term/GO:1901873	HUWE1 HIF1A
0.16758784668288	2	269	524005857834854	GO:1901136 Carbohydrate derivative catabolic process	https://amigo.geneontology.org/amigo/term/GO:1901136	HIF1A XDH
0.169142105072501	1	41	17189948263119	GO:0007212 G protein-coupled dopamine receptor signaling pathway	https://amigo.geneontology.org/amigo/term/GO:0007212	GNAS
0.169142105072501	1	41	17189948263119	GO:0035025 Positive regulation of rho protein signal transduction	https://amigo.geneontology.org/amigo/term/GO:0035025	MCF2L
0.169142105072501	1	41	17189948263119	GO:0090659 Walking behavior	https://amigo.geneontology.org/amigo/term/GO:0090659	OXR1
0.169142105072501	1	41	17189948263119	GO:1903749 Positive regulation of establishment of protein localization to mitochondrion	https://amigo.geneontology.org/amigo/term/GO:1903749	HUWE1
0.170026818309353	2	273	516328116328116	GO:0030072 Peptide hormone secretion	https://amigo.geneontology.org/amigo/term/GO:0030072	HIF1A GNAS
0.170026818309353	2	273	516328116328116	GO:0071560 Cellular response to transforming growth factor beta stimulus	https://amigo.geneontology.org/amigo/term/GO:0071560	SNX6 USP9X
0.170505779936891	2	275	512573002754821	GO:0003007 Heart morphogenesis	https://amigo.geneontology.org/amigo/term/GO:0003007	HIF1A FAT4
0.170505779936891	1	42	167806637806638	GO:0032196 Transposition	https://amigo.geneontology.org/amigo/term/GO:0032196	TDRD9
0.170505779936891	2	274	514443707144437	GO:0034599 Cellular response to oxidative stress	https://amigo.geneontology.org/amigo/term/GO:0034599	HIF1A OXR1
0.170505779936891	1	42	167806637806638	GO:0044743 Protein transmembrane import into intracellular organelle	https://amigo.geneontology.org/amigo/term/GO:0044743	USP9X
0.170505779936891	1	42	167806637806638	GO:0050732 Negative regulation of peptidyl-tyrosine phosphorylation	https://amigo.geneontology.org/amigo/term/GO:0050732	SNX6
0.170505779936891	1	42	167806637806638	GO:1902894 Negative regulation of mirna transcription	https://amigo.geneontology.org/amigo/term/GO:1902894	HIF1A
0.172121831617851	2	277	508872114648288	GO:0042326 Negative regulation of phosphorylation	https://amigo.geneontology.org/amigo/term/GO:0042326	XDH SNX6
0.172480363869895	1	45	156619528619529	GO:0001937 Negative regulation of endothelial cell proliferation	https://amigo.geneontology.org/amigo/term/GO:0001937	XDH
0.172480363869895	3	642	32934013027471	GO:0002683 Negative regulation of immune system process	https://amigo.geneontology.org/amigo/term/GO:0002683	SVEP1 GNAS PLCG1
0.172480363869895	2	279	505224285869447	GO:0002790 Peptide secretion	https://amigo.geneontology.org/amigo/term/GO:0002790	HIF1A GNAS
0.172480363869895	1	45	156619528619529	GO:0003351 Epithelial cilium movement involved in extracellular fluid movement	https://amigo.geneontology.org/amigo/term/GO:0003351	TTLL1
0.172480363869895	3	636	332447112635792	GO:0006914 Autophagy	https://amigo.geneontology.org/amigo/term/GO:0006914	HIF1A KDM4A SNX6
0.172480363869895	1	45	156619528619529	GO:0009167 Purine ribonucleoside monophosphate metabolic process	https://amigo.geneontology.org/amigo/term/GO:0009167	XDH
0.172480363869895	1	44	160179063360882	GO:0009262 Deoxyribonucleotide metabolic process	https://amigo.geneontology.org/amigo/term/GO:0009262	XDH
0.172480363869895	1	43	163904157857646	GO:0009394 2-deoxyribonucleotide metabolic process	https://amigo.geneontology.org/amigo/term/GO:0009394	XDH
0.172480363869895	3	629	336146842029195	GO:0009611 Response to wounding	https://amigo.geneontology.org/amigo/term/GO:0009611	GNAS HIF1A SVEP1
0.172480363869895	2	284	49632949210414	GO:0010001 Glial cell differentiation	https://amigo.geneontology.org/amigo/term/GO:0010001	MYRF KDM4A
0.172480363869895	1	45	156619528619529	GO:0010573 Vascular endothelial growth factor production	https://amigo.geneontology.org/amigo/term/GO:0010573	HIF1A
0.172480363869895	1	44	160179063360882	GO:0014014 Negative regulation of gliogenesis	https://amigo.geneontology.org/amigo/term/GO:0014014	KDM4A
0.172480363869895	1	44	160179063360882	GO:0019692 Deoxyribose phosphate metabolic process	https://amigo.geneontology.org/amigo/term/GO:0019692	XDH
0.172480363869895	1	45	156619528619529	GO:0030261 Chromosome condensation	https://amigo.geneontology.org/amigo/term/GO:0030261	KDM4A
0.172480363869895	1	45	156619528619529	GO:0030279 Negative regulation of ossification	https://amigo.geneontology.org/amigo/term/GO:0030279	HIF1A
0.172480363869895	1	45	156619528619529	GO:0045494 Photoreceptor cell maintenance	https://amigo.geneontology.org/amigo/term/GO:0045494	RHO
0.172480363869895	1	44	160179063360882	GO:0045601 Regulation of endothelial cell differentiation	https://amigo.geneontology.org/amigo/term/GO:0045601	XDH
0.172480363869895	8	3054	184620269492568	GO:0048468 Cell development	https://amigo.geneontology.org/amigo/term/GO:0048468	MYRF HIF1A KDM4A TTLL1 PTPRQ HMCN2 FAT4 USP9X
0.172480363869895	2	285	494587985114301	GO:0050708 Regulation of protein secretion	https://amigo.geneontology.org/amigo/term/GO:0050708	HIF1A GNAS
0.172480363869895	1	43	163904157857646	GO:0051281 Positive regulation of release of sequestered calcium ion into cytosol	https://amigo.geneontology.org/amigo/term/GO:0051281	PLCG1
0.172480363869895	3	632	334551208285386	GO:0051604 Protein maturation	https://amigo.geneontology.org/amigo/term/GO:0051604	SPCS2 MYRF TBCEL
0.172480363869895	4	1062	265456828168693	GO:0060341 Regulation of cellular localization	https://amigo.geneontology.org/amigo/term/GO:0060341	HUWE1 NVL HIF1A GNAS
0.172480363869895	3	636	332447112635792	GO:0061919 Process utilizing autophagic mechanism	https://amigo.geneontology.org/amigo/term/GO:0061919	HIF1A KDM4A SNX6
0.172480363869895	1	45	156619528619529	GO:0070232 Regulation of t cell apoptotic process	https://amigo.geneontology.org/amigo/term/GO:0070232	HIF1A
0.172480363869895	2	280	503419913419913	GO:0071559 Response to transforming growth factor beta	https://amigo.geneontology.org/amigo/term/GO:0071559	SNX6 USP9X
0.172480363869895	1	44	160179063360882	GO:1902175 Regulation of oxidative stress-induced intrinsic apoptotic signaling pathway	https://amigo.geneontology.org/amigo/term/GO:1902175	HIF1A
0.172480363869895	1	44	160179063360882	GO:1903146 Regulation of autophagy of mitochondrion	https://amigo.geneontology.org/amigo/term/GO:1903146	HIF1A
0.172480363869895	1	45	156619528619529	GO:2000378 Negative regulation of reactive oxygen species metabolic process	https://amigo.geneontology.org/amigo/term/GO:2000378	HIF1A
0.172480363869895	1	44	160179063360882	GO:2000629 Negative regulation of mirna metabolic process	https://amigo.geneontology.org/amigo/term/GO:2000629	HIF1A
0.172530005958561	4	1063	265207103965335	GO:0007017 Microtubule-based process	https://amigo.geneontology.org/amigo/term/GO:0007017	TTLL1 TBCEL RHO HIF1A
0.173952542280908	1	46	153214756258235	GO:0038084 Vascular endothelial growth factor signaling pathway	https://amigo.geneontology.org/amigo/term/GO:0038084	XDH
0.173952542280908	1	46	153214756258235	GO:0045687 Positive regulation of glial cell differentiation	https://amigo.geneontology.org/amigo/term/GO:0045687	MYRF
0.173952542280908	1	46	153214756258235	GO:0045761 Regulation of adenylate cyclase activity	https://amigo.geneontology.org/amigo/term/GO:0045761	GNAS
0.173952542280908	2	289	487742476669812	GO:0046883 Regulation of hormone secretion	https://amigo.geneontology.org/amigo/term/GO:0046883	HIF1A GNAS
0.173952542280908	1	46	153214756258235	GO:0071542 Dopaminergic neuron differentiation	https://amigo.geneontology.org/amigo/term/GO:0071542	HIF1A
0.173952542280908	2	289	487742476669812	GO:0071695 Anatomical structure maturation	https://amigo.geneontology.org/amigo/term/GO:0071695	HIF1A FAT4
0.1748085377341	1	47	149954867827208	GO:0002920 Regulation of humoral immune response	https://amigo.geneontology.org/amigo/term/GO:0002920	SVEP1
0.1748085377341	1	47	149954867827208	GO:0009126 Purine nucleoside monophosphate metabolic process	https://amigo.geneontology.org/amigo/term/GO:0009126	XDH
0.1748085377341	3	650	325286713286713	GO:0010256 Endomembrane system organization	https://amigo.geneontology.org/amigo/term/GO:0010256	HUWE1 MYRF FAT4
0.1748085377341	1	47	149954867827208	GO:0010463 Mesenchymal cell proliferation	https://amigo.geneontology.org/amigo/term/GO:0010463	FAT4
0.1748085377341	2	292	482731423827314	GO:0016072 Rrna metabolic process	https://amigo.geneontology.org/amigo/term/GO:0016072	NOP10 NVL
0.1748085377341	1	47	149954867827208	GO:0021587 Cerebellum morphogenesis	https://amigo.geneontology.org/amigo/term/GO:0021587	TTLL1
0.1748085377341	4	1077	261759657859936	GO:0033365 Protein localization to organelle	https://amigo.geneontology.org/amigo/term/GO:0033365	HUWE1 SPCS2 USP9X NVL
0.1748085377341	1	47	149954867827208	GO:1900744 Regulation of p38mapk cascade	https://amigo.geneontology.org/amigo/term/GO:1900744	XDH
0.1748085377341	1	47	149954867827208	GO:1904646 Cellular response to amyloid-beta	https://amigo.geneontology.org/amigo/term/GO:1904646	SNX6
0.176241812372963	1	48	146830808080808	GO:0003016 Respiratory system process	https://amigo.geneontology.org/amigo/term/GO:0003016	TTLL1
0.176241812372963	1	48	146830808080808	GO:0006284 Base-excision repair	https://amigo.geneontology.org/amigo/term/GO:0006284	HUWE1
0.176241812372963	1	48	146830808080808	GO:0006513 Protein monoubiquitination	https://amigo.geneontology.org/amigo/term/GO:0006513	HUWE1
0.176241812372963	1	48	146830808080808	GO:0006858 Extracellular transport	https://amigo.geneontology.org/amigo/term/GO:0006858	TTLL1
0.176241812372963	8	3115	181004912690306	GO:0009892 Negative regulation of metabolic process	https://amigo.geneontology.org/amigo/term/GO:0009892	ZNFX1 KDM4A SNX6 XDH HIF1A TDRD9 OXR1 USP9X
0.176241812372963	1	48	146830808080808	GO:0014888 Striated muscle adaptation	https://amigo.geneontology.org/amigo/term/GO:0014888	KDM4A
0.176241812372963	1	48	146830808080808	GO:0048713 Regulation of oligodendrocyte differentiation	https://amigo.geneontology.org/amigo/term/GO:0048713	MYRF
0.176461209229142	4	1086	259590378927395	GO:0009887 Animal organ morphogenesis	https://amigo.geneontology.org/amigo/term/GO:0009887	HIF1A PTPRQ RHO FAT4
0.178246319060351	1	49	143834260977118	GO:0006958 Complement activation classical pathway	https://amigo.geneontology.org/amigo/term/GO:0006958	SVEP1
0.178246319060351	1	49	143834260977118	GO:0031641 Regulation of myelination	https://amigo.geneontology.org/amigo/term/GO:0031641	MYRF
0.178246319060351	1	49	143834260977118	GO:0043457 Regulation of cellular respiration	https://amigo.geneontology.org/amigo/term/GO:0043457	HIF1A
0.178246319060351	1	49	143834260977118	GO:1903214 Regulation of protein targeting to mitochondrion	https://amigo.geneontology.org/amigo/term/GO:1903214	HUWE1
0.179300606870509	2	301	468297593878989	GO:0021537 Telencephalon development	https://amigo.geneontology.org/amigo/term/GO:0021537	HIF1A FAT4
0.179905384603019	1	50	140957575757576	GO:0007602 Phototransduction	https://amigo.geneontology.org/amigo/term/GO:0007602	RHO
0.179905384603019	1	50	140957575757576	GO:0014003 Oligodendrocyte development	https://amigo.geneontology.org/amigo/term/GO:0014003	MYRF
0.179905384603019	1	50	140957575757576	GO:0021575 Hindbrain morphogenesis	https://amigo.geneontology.org/amigo/term/GO:0021575	TTLL1
0.179905384603019	3	669	316048376138062	GO:0048514 Blood vessel morphogenesis	https://amigo.geneontology.org/amigo/term/GO:0048514	HIF1A PLCG1 XDH
0.179905384603019	1	50	140957575757576	GO:0061097 Regulation of protein tyrosine kinase activity	https://amigo.geneontology.org/amigo/term/GO:0061097	SNX6
0.180749263178114	4	1102	255821371610845	GO:0070647 Protein modification by small protein conjugation or removal	https://amigo.geneontology.org/amigo/term/GO:0070647	HUWE1 USP9X DTX3 HIF1A
0.181832301637488	1	51	138193701723114	GO:0008542 Visual learning	https://amigo.geneontology.org/amigo/term/GO:0008542	HIF1A
0.181832301637488	1	51	138193701723114	GO:0035850 Epithelial cell differentiation involved in kidney development	https://amigo.geneontology.org/amigo/term/GO:0035850	FAT4
0.181832301637488	1	51	138193701723114	GO:0045047 Protein targeting to er	https://amigo.geneontology.org/amigo/term/GO:0045047	SPCS2
0.181832301637488	1	51	138193701723114	GO:0048546 Digestive tract morphogenesis	https://amigo.geneontology.org/amigo/term/GO:0048546	HIF1A
0.182128560225572	2	307	459145197907413	GO:0015833 Peptide transport	https://amigo.geneontology.org/amigo/term/GO:0015833	HIF1A GNAS
0.182464798361336	1	52	135536130536131	GO:0001881 Receptor recycling	https://amigo.geneontology.org/amigo/term/GO:0001881	USP9X
0.182464798361336	1	52	135536130536131	GO:0009116 Nucleoside metabolic process	https://amigo.geneontology.org/amigo/term/GO:0009116	XDH
0.182464798361336	1	52	135536130536131	GO:0031279 Regulation of cyclase activity	https://amigo.geneontology.org/amigo/term/GO:0031279	GNAS
0.182464798361336	2	310	454701857282502	GO:0031348 Negative regulation of defense response	https://amigo.geneontology.org/amigo/term/GO:0031348	GNAS PLCG1
0.182464798361336	1	52	135536130536131	GO:0044788 Modulation by host of viral process	https://amigo.geneontology.org/amigo/term/GO:0044788	PI4KA
0.182464798361336	1	52	135536130536131	GO:0045646 Regulation of erythrocyte differentiation	https://amigo.geneontology.org/amigo/term/GO:0045646	HIF1A
0.182464798361336	2	310	454701857282502	GO:0048511 Rhythmic process	https://amigo.geneontology.org/amigo/term/GO:0048511	HUWE1 USP9X
0.182464798361336	2	310	454701857282502	GO:0051962 Positive regulation of nervous system development	https://amigo.geneontology.org/amigo/term/GO:0051962	HIF1A MYRF
0.182464798361336	1	52	135536130536131	GO:0120316 Sperm flagellum assembly	https://amigo.geneontology.org/amigo/term/GO:0120316	TTLL1
0.183183051004807	2	311	453239793432719	GO:0040029 Epigenetic regulation of gene expression	https://amigo.geneontology.org/amigo/term/GO:0040029	ZNFX1 TDRD9
0.18427429833684	3	685	308666224286662	GO:0043009 Chordate embryonic development	https://amigo.geneontology.org/amigo/term/GO:0043009	TTLL1 HIF1A PLCG1
0.184657571278063	1	53	132978845054317	GO:0030857 Negative regulation of epithelial cell differentiation	https://amigo.geneontology.org/amigo/term/GO:0030857	XDH
0.186475025060779	1	54	130516273849607	GO:0002066 Columnar/cuboidal epithelial cell development	https://amigo.geneontology.org/amigo/term/GO:0002066	HIF1A
0.186475025060779	3	690	306429512516469	GO:0002253 Activation of immune response	https://amigo.geneontology.org/amigo/term/GO:0002253	SVEP1 PLCG1 ZNFX1
0.186475025060779	2	316	446068277713847	GO:0045765 Regulation of angiogenesis	https://amigo.geneontology.org/amigo/term/GO:0045765	HIF1A PLCG1
0.186475025060779	1	54	130516273849607	GO:0051339 Regulation of lyase activity	https://amigo.geneontology.org/amigo/term/GO:0051339	GNAS
0.186475025060779	1	54	130516273849607	GO:1902692 Regulation of neuroblast proliferation	https://amigo.geneontology.org/amigo/term/GO:1902692	HIF1A
0.186869866207661	2	317	444661122263646	GO:0048562 Embryonic organ morphogenesis	https://amigo.geneontology.org/amigo/term/GO:0048562	HIF1A PTPRQ
0.188258421652595	1	55	128143250688705	GO:0006110 Regulation of glycolytic process	https://amigo.geneontology.org/amigo/term/GO:0006110	HIF1A
0.188258421652595	1	55	128143250688705	GO:0030811 Regulation of nucleotide catabolic process	https://amigo.geneontology.org/amigo/term/GO:0030811	HIF1A
0.188258421652595	1	55	128143250688705	GO:0033121 Regulation of purine nucleotide catabolic process	https://amigo.geneontology.org/amigo/term/GO:0033121	HIF1A
0.188258421652595	1	55	128143250688705	GO:0072599 Establishment of protein localization to endoplasmic reticulum	https://amigo.geneontology.org/amigo/term/GO:0072599	SPCS2
0.189703109677262	1	56	125854978354978	GO:0007140 Male meiotic nuclear division	https://amigo.geneontology.org/amigo/term/GO:0007140	TDRD9
0.189703109677262	2	322	437756446452099	GO:0010563 Negative regulation of phosphorus metabolic process	https://amigo.geneontology.org/amigo/term/GO:0010563	XDH SNX6
0.189703109677262	1	56	125854978354978	GO:0021695 Cerebellar cortex development	https://amigo.geneontology.org/amigo/term/GO:0021695	TTLL1
0.189703109677262	2	322	437756446452099	GO:0045936 Negative regulation of phosphate metabolic process	https://amigo.geneontology.org/amigo/term/GO:0045936	XDH SNX6
0.189703109677262	1	56	125854978354978	GO:0050885 Neuromuscular process controlling balance	https://amigo.geneontology.org/amigo/term/GO:0050885	PTPRQ
0.189703109677262	2	322	437756446452099	GO:1901342 Regulation of vasculature development	https://amigo.geneontology.org/amigo/term/GO:1901342	HIF1A PLCG1
0.190815355854012	1	57	123646996278575	GO:0006346 Dna methylation-dependent heterochromatin formation	https://amigo.geneontology.org/amigo/term/GO:0006346	TDRD9
0.190815355854012	3	706	299484934329127	GO:0009792 Embryo development ending in birth or egg hatching	https://amigo.geneontology.org/amigo/term/GO:0009792	TTLL1 HIF1A PLCG1
0.190815355854012	1	57	123646996278575	GO:0050982 Detection of mechanical stimulus	https://amigo.geneontology.org/amigo/term/GO:0050982	PTPRQ
0.190815355854012	2	325	433715617715618	GO:0051321 Meiotic cell cycle	https://amigo.geneontology.org/amigo/term/GO:0051321	SHOC1 TDRD9
0.190815355854012	1	57	123646996278575	GO:0051646 Mitochondrion localization	https://amigo.geneontology.org/amigo/term/GO:0051646	HIF1A
0.190815355854012	2	326	432385201710355	GO:0098742 Cell-cell adhesion via plasma-membrane adhesion molecules	https://amigo.geneontology.org/amigo/term/GO:0098742	HMCN2 FAT4
0.190815355854012	1	57	123646996278575	GO:1903747 Regulation of establishment of protein localization to mitochondrion	https://amigo.geneontology.org/amigo/term/GO:1903747	HUWE1
0.191590642562639	1	58	121515151515152	GO:0001755 Neural crest cell migration	https://amigo.geneontology.org/amigo/term/GO:0001755	HIF1A
0.191590642562639	1	58	121515151515152	GO:0001895 Retina homeostasis	https://amigo.geneontology.org/amigo/term/GO:0001895	RHO
0.191590642562639	1	58	121515151515152	GO:0007157 Heterophilic cell-cell adhesion via plasma membrane cell adhesion molecules	https://amigo.geneontology.org/amigo/term/GO:0007157	FAT4
0.191590642562639	1	58	121515151515152	GO:0007632 Visual behavior	https://amigo.geneontology.org/amigo/term/GO:0007632	HIF1A
0.191590642562639	4	1155	2440823822642	GO:0035295 Tube development	https://amigo.geneontology.org/amigo/term/GO:0035295	HIF1A PLCG1 XDH FAT4
0.191590642562639	4	1154	244293892127514	GO:0050790 Regulation of catalytic activity	https://amigo.geneontology.org/amigo/term/GO:0050790	XDH SNX6 GNAS HIF1A
0.191590642562639	1	58	121515151515152	GO:1904645 Response to amyloid-beta	https://amigo.geneontology.org/amigo/term/GO:1904645	SNX6
0.191590642562639	1	58	121515151515152	GO:2000107 Negative regulation of leukocyte apoptotic process	https://amigo.geneontology.org/amigo/term/GO:2000107	HIF1A
0.191961810737841	3	713	296544689532067	GO:0043085 Positive regulation of catalytic activity	https://amigo.geneontology.org/amigo/term/GO:0043085	XDH GNAS HIF1A
0.192644418314307	2	332	424571011317999	GO:0001822 Kidney development	https://amigo.geneontology.org/amigo/term/GO:0001822	NID1 FAT4
0.192644418314307	2	332	424571011317999	GO:0009416 Response to light stimulus	https://amigo.geneontology.org/amigo/term/GO:0009416	RHO HIF1A
0.192644418314307	1	59	119455572675912	GO:0032435 Negative regulation of proteasomal ubiquitin-dependent protein catabolic process	https://amigo.geneontology.org/amigo/term/GO:0032435	USP9X
0.192644418314307	1	59	119455572675912	GO:0042220 Response to cocaine	https://amigo.geneontology.org/amigo/term/GO:0042220	MYRF
0.192644418314307	4	1159	243239992679164	GO:0043687 Post-translational protein modification	https://amigo.geneontology.org/amigo/term/GO:0043687	HUWE1 USP9X DTX3 HIF1A
0.192644418314307	1	59	119455572675912	GO:0048010 Vascular endothelial growth factor receptor signaling pathway	https://amigo.geneontology.org/amigo/term/GO:0048010	HIF1A
0.194268082391508	3	721	293254318497037	GO:0000226 Microtubule cytoskeleton organization	https://amigo.geneontology.org/amigo/term/GO:0000226	TTLL1 TBCEL RHO
0.194268082391508	2	335	420768882858435	GO:0043588 Skin development	https://amigo.geneontology.org/amigo/term/GO:0043588	GNAS GRHL1
0.194268082391508	1	60	117464646464646	GO:0061005 Cell differentiation involved in kidney development	https://amigo.geneontology.org/amigo/term/GO:0061005	FAT4
0.194268082391508	1	60	117464646464646	GO:0090497 Mesenchymal cell migration	https://amigo.geneontology.org/amigo/term/GO:0090497	HIF1A
0.194268082391508	1	60	117464646464646	GO:1903351 Cellular response to dopamine	https://amigo.geneontology.org/amigo/term/GO:1903351	GNAS
0.19586266554805	3	726	291234660656148	GO:0006511 Ubiquitin-dependent protein catabolic process	https://amigo.geneontology.org/amigo/term/GO:0006511	HUWE1 PSMD2 USP9X
0.19586266554805	1	61	115538996522603	GO:0038066 P38mapk cascade	https://amigo.geneontology.org/amigo/term/GO:0038066	XDH
0.19586266554805	1	61	115538996522603	GO:0045604 Regulation of epidermal cell differentiation	https://amigo.geneontology.org/amigo/term/GO:0045604	GRHL1
0.19586266554805	1	61	115538996522603	GO:0061178 Regulation of insulin secretion involved in cellular response to glucose stimulus	https://amigo.geneontology.org/amigo/term/GO:0061178	HIF1A
0.19586266554805	1	61	115538996522603	GO:1990000 Amyloid fibril formation	https://amigo.geneontology.org/amigo/term/GO:1990000	USP9X
0.197029217183574	1	63	111871091871092	GO:0001658 Branching involved in ureteric bud morphogenesis	https://amigo.geneontology.org/amigo/term/GO:0001658	FAT4
0.197029217183574	1	63	111871091871092	GO:0002455 Humoral immune response mediated by circulating immunoglobulin	https://amigo.geneontology.org/amigo/term/GO:0002455	SVEP1
0.197029217183574	1	62	113675464320626	GO:0010543 Regulation of platelet activation	https://amigo.geneontology.org/amigo/term/GO:0010543	SVEP1
0.197029217183574	1	62	113675464320626	GO:0016073 Snrna metabolic process	https://amigo.geneontology.org/amigo/term/GO:0016073	NOP10
0.197029217183574	4	1188	237302316090195	GO:0019637 Organophosphate metabolic process	https://amigo.geneontology.org/amigo/term/GO:0019637	PLCG1 PI4KA HIF1A XDH
0.197029217183574	3	736	28727766798419	GO:0019941 Modification-dependent protein catabolic process	https://amigo.geneontology.org/amigo/term/GO:0019941	HUWE1 PSMD2 USP9X
0.197029217183574	8	3290	171376991802524	GO:0033036 Macromolecule localization	https://amigo.geneontology.org/amigo/term/GO:0033036	HUWE1 NOP10 SPCS2 USP9X NVL HIF1A SNX6 GNAS
0.197029217183574	1	62	113675464320626	GO:0035329 Hippo signaling	https://amigo.geneontology.org/amigo/term/GO:0035329	FAT4
0.197029217183574	1	62	113675464320626	GO:0042058 Regulation of epidermal growth factor receptor signaling pathway	https://amigo.geneontology.org/amigo/term/GO:0042058	SNX6
0.197029217183574	1	62	113675464320626	GO:0051341 Regulation of oxidoreductase activity	https://amigo.geneontology.org/amigo/term/GO:0051341	HIF1A
0.197029217183574	2	344	409760394644116	GO:0062197 Cellular response to chemical stress	https://amigo.geneontology.org/amigo/term/GO:0062197	HIF1A OXR1
0.197029217183574	1	63	111871091871092	GO:0070228 Regulation of lymphocyte apoptotic process	https://amigo.geneontology.org/amigo/term/GO:0070228	HIF1A
0.197029217183574	1	63	111871091871092	GO:0071868 Cellular response to monoamine stimulus	https://amigo.geneontology.org/amigo/term/GO:0071868	GNAS
0.197029217183574	1	63	111871091871092	GO:0071870 Cellular response to catecholamine stimulus	https://amigo.geneontology.org/amigo/term/GO:0071870	GNAS
0.197029217183574	2	342	412156654261917	GO:0072001 Renal system development	https://amigo.geneontology.org/amigo/term/GO:0072001	NID1 FAT4
0.197029217183574	1	63	111871091871092	GO:1902895 Positive regulation of mirna transcription	https://amigo.geneontology.org/amigo/term/GO:1902895	HIF1A
0.197029217183574	1	62	113675464320626	GO:1903350 Response to dopamine	https://amigo.geneontology.org/amigo/term/GO:1903350	GNAS
0.197781165014982	2	346	407391837449641	GO:0046879 Hormone secretion	https://amigo.geneontology.org/amigo/term/GO:0046879	HIF1A GNAS
0.198257410774607	1	64	110123106060606	GO:0009395 Phospholipid catabolic process	https://amigo.geneontology.org/amigo/term/GO:0009395	PLCG1
0.198257410774607	7	2748	17953111905077	GO:0031324 Negative regulation of cellular metabolic process	https://amigo.geneontology.org/amigo/term/GO:0031324	ZNFX1 KDM4A SNX6 XDH HIF1A TDRD9 USP9X
0.198257410774607	3	741	285339222181327	GO:0043632 Modification-dependent macromolecule catabolic process	https://amigo.geneontology.org/amigo/term/GO:0043632	HUWE1 PSMD2 USP9X
0.198257410774607	1	64	110123106060606	GO:0070231 T cell apoptotic process	https://amigo.geneontology.org/amigo/term/GO:0070231	HIF1A
0.198257410774607	2	348	405050505050505	GO:1904951 Positive regulation of establishment of protein localization	https://amigo.geneontology.org/amigo/term/GO:1904951	HUWE1 HIF1A
0.199010564228041	1	65	108428904428904	GO:0006695 Cholesterol biosynthetic process	https://amigo.geneontology.org/amigo/term/GO:0006695	MSMO1
0.199010564228041	1	65	108428904428904	GO:0007004 Telomere maintenance via telomerase	https://amigo.geneontology.org/amigo/term/GO:0007004	NOP10
0.199010564228041	1	65	108428904428904	GO:0007129 Homologous chromosome pairing at meiosis	https://amigo.geneontology.org/amigo/term/GO:0007129	SHOC1
0.199010564228041	1	65	108428904428904	GO:0008631 Intrinsic apoptotic signaling pathway in response to oxidative stress	https://amigo.geneontology.org/amigo/term/GO:0008631	HIF1A
0.199010564228041	1	65	108428904428904	GO:0009161 Ribonucleoside monophosphate metabolic process	https://amigo.geneontology.org/amigo/term/GO:0009161	XDH
0.199010564228041	4	1197	235518088149667	GO:0009790 Embryo development	https://amigo.geneontology.org/amigo/term/GO:0009790	TTLL1 HIF1A PLCG1 PTPRQ
0.199010564228041	1	65	108428904428904	GO:1902653 Secondary alcohol biosynthetic process	https://amigo.geneontology.org/amigo/term/GO:1902653	MSMO1
0.199257734165006	2	354	398185242253039	GO:0006650 Glycerophospholipid metabolic process	https://amigo.geneontology.org/amigo/term/GO:0006650	PLCG1 PI4KA
0.199257734165006	7	2767	178298343025484	GO:0008104 Protein localization	https://amigo.geneontology.org/amigo/term/GO:0008104	HUWE1 SPCS2 USP9X NVL HIF1A SNX6 GNAS
0.199257734165006	4	1204	234148796939495	GO:0019953 Sexual reproduction	https://amigo.geneontology.org/amigo/term/GO:0019953	SHOC1 TTLL1 TDRD9 USP9X
0.199257734165006	5	1701	20716868865017	GO:0022414 Reproductive process	https://amigo.geneontology.org/amigo/term/GO:0022414	SHOC1 TTLL1 TDRD9 GNAS USP9X
0.199257734165006	1	66	106786042240588	GO:0035315 Hair cell differentiation	https://amigo.geneontology.org/amigo/term/GO:0035315	PTPRQ
0.199257734165006	1	66	106786042240588	GO:0043470 Regulation of carbohydrate catabolic process	https://amigo.geneontology.org/amigo/term/GO:0043470	HIF1A
0.199257734165006	1	66	106786042240588	GO:0045071 Negative regulation of viral genome replication	https://amigo.geneontology.org/amigo/term/GO:0045071	ZNFX1
0.199257734165006	1	66	106786042240588	GO:0071867 Response to monoamine	https://amigo.geneontology.org/amigo/term/GO:0071867	GNAS
0.199257734165006	1	66	106786042240588	GO:0071869 Response to catecholamine	https://amigo.geneontology.org/amigo/term/GO:0071869	GNAS
0.199257734165006	1	66	106786042240588	GO:2000179 Positive regulation of neural precursor cell proliferation	https://amigo.geneontology.org/amigo/term/GO:2000179	HIF1A
0.199388760088014	2	355	397063593683312	GO:0006605 Protein targeting	https://amigo.geneontology.org/amigo/term/GO:0006605	HUWE1 SPCS2
0.199388760088014	1	67	105192220714609	GO:0007131 Reciprocal meiotic recombination	https://amigo.geneontology.org/amigo/term/GO:0007131	SHOC1
0.199388760088014	2	357	394839147780324	GO:0009914 Hormone transport	https://amigo.geneontology.org/amigo/term/GO:0009914	HIF1A GNAS
0.199388760088014	3	755	280048163756773	GO:0018193 Peptidyl-amino acid modification	https://amigo.geneontology.org/amigo/term/GO:0018193	OXR1 SNX6 TTLL1
0.199388760088014	1	67	105192220714609	GO:0045682 Regulation of epidermis development	https://amigo.geneontology.org/amigo/term/GO:0045682	GRHL1
0.199388760088014	1	67	105192220714609	GO:0046854 Phosphatidylinositol phosphate biosynthetic process	https://amigo.geneontology.org/amigo/term/GO:0046854	PI4KA
0.199388760088014	2	356	395948246510044	GO:0060562 Epithelial tube morphogenesis	https://amigo.geneontology.org/amigo/term/GO:0060562	HIF1A FAT4
0.199388760088014	1	67	105192220714609	GO:0140527 Reciprocal homologous recombination	https://amigo.geneontology.org/amigo/term/GO:0140527	SHOC1
0.199388760088014	1	67	105192220714609	GO:0140719 Constitutive heterochromatin formation	https://amigo.geneontology.org/amigo/term/GO:0140719	TDRD9
0.199768574754586	7	2779	17752843294405	GO:0070727 Cellular macromolecule localization	https://amigo.geneontology.org/amigo/term/GO:0070727	HUWE1 SPCS2 USP9X NVL HIF1A SNX6 GNAS

## Sheet: April_enrichment_in_males
Enrichment FDR	nGenes	Pathway Genes	Fold Enrichment	Pathway	URL	Genes
1.56E-05	25	1701	3675573508	GO:0022414 Reproductive process	https://amigo.geneontology.org/amigo/term/GO:0022414	DMC1 TEX14 RPA1 DRC7 MSH5 ZGLP1 NDC80 TTLL1 SPAG1 PACRG MSH6 RECK SMC2 WDR19 EFHB PLK1 EXO1 TPPP2 FOXJ3 TSSK2 TSSK1B NIPBL KIF9 EFHC1 TTLL3
0.000185614	18	1063	4234758596	GO:0007017 Microtubule-based process	https://amigo.geneontology.org/amigo/term/GO:0007017	IFT88 KIF9 EFHC1 TTLL1 STIL LCA5 KIF23 WDR19 DRC7 PLK1 TPPP2 TTLL3 NDC80 PACRG LMNA EFHB RHO SPAG1
0.000353947	35	3920	2232910906	GO:0006996 Organelle organization	https://amigo.geneontology.org/amigo/term/GO:0006996	IFT88 NDC80 EFHC1 DMC1 TTLL1 TEX14 STIL RPA1 LCA5 SMC2 KIF23 VPS8 WDR19 LMNA NIPBL NEMF PLK1 IQCB1 TPPP2 MSH5 TTLL3 DNA2 NOP10 PTPRS MKLN1 DRC7 FTCD RHO FOXJ3 KIF9 STK25 SAXO1 SPAG1 DVL3 EXO1
0.000353947	12	497	6038294282	GO:0007018 Microtubule-based movement	https://amigo.geneontology.org/amigo/term/GO:0007018	IFT88 KIF9 LCA5 KIF23 WDR19 DRC7 TTLL3 TTLL1 PACRG EFHB TPPP2 EFHC1
0.000353947	18	1204	3738827564	GO:0019953 Sexual reproduction	https://amigo.geneontology.org/amigo/term/GO:0019953	DMC1 TEX14 RPA1 MSH5 ZGLP1 NDC80 TTLL1 SPAG1 PACRG MSH6 SMC2 DRC7 PLK1 EXO1 TPPP2 FOXJ3 TSSK2 TSSK1B
0.000353947	8	200	1000344086	GO:0030317 Flagellated sperm motility	https://amigo.geneontology.org/amigo/term/GO:0030317	DRC7 TTLL1 PACRG EFHB TPPP2 KIF9 EFHC1 TTLL3
0.000353947	10	325	7694954508	GO:0051321 Meiotic cell cycle	https://amigo.geneontology.org/amigo/term/GO:0051321	DMC1 TEX14 RPA1 MSH5 NDC80 SMC2 PLK1 EXO1 FOXJ3 MSH6
0.000353947	8	200	1000344086	GO:0097722 Sperm motility	https://amigo.geneontology.org/amigo/term/GO:0097722	DRC7 TTLL1 PACRG EFHB TPPP2 KIF9 EFHC1 TTLL3
0.000598632	8	224	8931643625	GO:0001539 Cilium or flagellum-dependent cell motility	https://amigo.geneontology.org/amigo/term/GO:0001539	EFHC1 DRC7 TTLL1 PACRG EFHB TPPP2 KIF9 TTLL3
0.000598632	8	224	8931643625	GO:0060285 Cilium-dependent cell motility	https://amigo.geneontology.org/amigo/term/GO:0060285	EFHC1 DRC7 TTLL1 PACRG EFHB TPPP2 KIF9 TTLL3
0.000598632	8	221	9052887656	GO:0060294 Cilium movement involved in cell motility	https://amigo.geneontology.org/amigo/term/GO:0060294	DRC7 TTLL1 PACRG EFHB TPPP2 KIF9 EFHC1 TTLL3
0.000771615	13	706	4604983399	GO:0051276 Chromosome organization	https://amigo.geneontology.org/amigo/term/GO:0051276	NDC80 DMC1 TEX14 RPA1 SMC2 KIF23 NIPBL MSH5 PLK1 NOP10 DNA2 LMNA EXO1
0.001135543	8	250	8002752688	GO:1903046 Meiotic cell cycle process	https://amigo.geneontology.org/amigo/term/GO:1903046	DMC1 TEX14 MSH5 NDC80 SMC2 PLK1 FOXJ3 MSH6
0.001524914	8	263	7607179361	GO:0003341 Cilium movement	https://amigo.geneontology.org/amigo/term/GO:0003341	DRC7 TTLL3 TTLL1 PACRG EFHB TPPP2 KIF9 EFHC1
0.003496138	12	721	4162319359	GO:0000226 Microtubule cytoskeleton organization	https://amigo.geneontology.org/amigo/term/GO:0000226	EFHC1 TTLL1 STIL KIF23 PLK1 TPPP2 NDC80 DRC7 LMNA RHO SPAG1 TTLL3
0.003496138	4	44	2273509286	GO:0006298 Mismatch repair	https://amigo.geneontology.org/amigo/term/GO:0006298	MSH6 EXO1 MSH5 RPA1
0.003496138	4	45	2222986858	GO:0045494 Photoreceptor cell maintenance	https://amigo.geneontology.org/amigo/term/GO:0045494	PROM1 RHO IQCB1 LCA5
0.003496138	15	1105	3394832871	GO:0070925 Organelle assembly	https://amigo.geneontology.org/amigo/term/GO:0070925	IFT88 KIF23 WDR19 IQCB1 TTLL3 STIL PLK1 NDC80 TTLL1 PTPRS DRC7 RHO KIF9 SAXO1 SPAG1
0.003826643	31	3775	2053686534	GO:0044085 Cellular component biogenesis	https://amigo.geneontology.org/amigo/term/GO:0044085	IFT88 NUBP2 DMC1 EIF3A KIF23 NOM1 WDR19 IQCB1 TPPP2 NOP10 MSH5 TTLL3 STIL PLK1 NDC80 TTLL1 PTPRS LRP4 KAT6B DRC7 RHO KIF9 STK25 SAXO1 NEMF TAF3 SPAG1 MED18 VPS8 DNA2 EXO1
0.003826643	7	228	7678079608	GO:0140013 Meiotic nuclear division	https://amigo.geneontology.org/amigo/term/GO:0140013	DMC1 TEX14 MSH5 NDC80 SMC2 PLK1 FOXJ3
0.004739816	6	163	9205620424	GO:0061982 Meiosis i cell cycle process	https://amigo.geneontology.org/amigo/term/GO:0061982	DMC1 MSH5 NDC80 PLK1 FOXJ3 MSH6
0.004744506	13	892	3644751434	GO:0007276 Gamete generation	https://amigo.geneontology.org/amigo/term/GO:0007276	TEX14 ZGLP1 NDC80 DMC1 TTLL1 PACRG MSH6 DRC7 PLK1 TPPP2 FOXJ3 TSSK2 TSSK1B
0.004744506	29	3468	2091261426	GO:0022607 Cellular component assembly	https://amigo.geneontology.org/amigo/term/GO:0022607	IFT88 NUBP2 DMC1 EIF3A KIF23 WDR19 IQCB1 TPPP2 MSH5 TTLL3 STIL PLK1 NDC80 TTLL1 PTPRS LRP4 KAT6B DRC7 RHO KIF9 STK25 SAXO1 NEMF TAF3 SPAG1 MED18 VPS8 DNA2 EXO1
0.006032747	9	444	5069311247	GO:0044782 Cilium organization	https://amigo.geneontology.org/amigo/term/GO:0044782	IFT88 LCA5 WDR19 IQCB1 TTLL3 TTLL1 DRC7 SAXO1 SPAG1
0.006172129	5	109	1147183585	GO:0045132 Meiotic chromosome segregation	https://amigo.geneontology.org/amigo/term/GO:0045132	MSH5 NDC80 DMC1 SMC2 PLK1
0.006394329	4	58	1724731183	GO:0001895 Retina homeostasis	https://amigo.geneontology.org/amigo/term/GO:0001895	PROM1 RHO IQCB1 LCA5
0.006394329	11	681	4039568629	GO:0006281 Dna repair	https://amigo.geneontology.org/amigo/term/GO:0006281	DMC1 MSH6 RPA1 NIPBL EXO1 DNA2 PLK1 NSD2 FANCI MSH5 PARP4
0.006507921	8	356	5619910596	GO:0098813 Nuclear chromosome segregation	https://amigo.geneontology.org/amigo/term/GO:0098813	NDC80 TEX14 SMC2 KIF23 MSH5 PLK1 DMC1 NIPBL
0.006507921	2	4	1250430108	GO:0098968 Neurotransmitter receptor transport postsynaptic membrane to endosome	https://amigo.geneontology.org/amigo/term/GO:0098968	SCRIB MKLN1
0.007082986	9	467	4819644954	GO:0007059 Chromosome segregation	https://amigo.geneontology.org/amigo/term/GO:0007059	NDC80 TEX14 SMC2 KIF23 MSH5 PLK1 DMC1 NIPBL STIL
0.007370999	8	371	5392690491	GO:0006310 Dna recombination	https://amigo.geneontology.org/amigo/term/GO:0006310	DMC1 RPA1 NIPBL EXO1 MSH5 MSH6 PLK1 NSD2
0.007370999	18	1699	2649528185	GO:0030030 Cell projection organization	https://amigo.geneontology.org/amigo/term/GO:0030030	IFT88 SEZ6 LCA5 WDR19 IQCB1 TTLL3 NUBP2 TTLL1 PTPRS STK25 LRP4 HMCN2 SAXO1 DRC7 SCRIB MYLIP SPAG1 DVL3
0.007370999	11	705	3902051399	GO:0048232 Male gamete generation	https://amigo.geneontology.org/amigo/term/GO:0048232	TEX14 ZGLP1 DMC1 TTLL1 PACRG MSH6 DRC7 TPPP2 FOXJ3 TSSK2 TSSK1B
0.009972595	9	497	4528720711	GO:0000280 Nuclear division	https://amigo.geneontology.org/amigo/term/GO:0000280	NDC80 DMC1 TEX14 SMC2 KIF23 MSH5 PLK1 NIPBL FOXJ3
0.011727622	6	211	7111450848	GO:0000070 Mitotic sister chromatid segregation	https://amigo.geneontology.org/amigo/term/GO:0000070	NDC80 TEX14 SMC2 KIF23 PLK1 NIPBL
0.012132736	5	136	9194339026	GO:0001578 Microtubule bundle formation	https://amigo.geneontology.org/amigo/term/GO:0001578	PLK1 TTLL1 DRC7 SPAG1 TTLL3
0.013555472	6	219	6851671822	GO:0031503 Protein-containing complex localization	https://amigo.geneontology.org/amigo/term/GO:0031503	IFT88 LCA5 WDR19 LMNA SCRIB MKLN1
0.013727877	18	1822	247066322	GO:0007049 Cell cycle	https://amigo.geneontology.org/amigo/term/GO:0007049	NDC80 EFHC1 DMC1 TEX14 STIL RPA1 SMC2 KIF23 NIPBL PLK1 MSH5 LMNA SCRIB DNA2 EXO1 FOXJ3 MSH6 MELK
0.013727877	13	1056	3078710492	GO:0048609 Multicellular organismal reproductive process	https://amigo.geneontology.org/amigo/term/GO:0048609	TEX14 ZGLP1 NDC80 DMC1 TTLL1 PACRG MSH6 DRC7 PLK1 TPPP2 FOXJ3 TSSK2 TSSK1B
0.013727877	8	416	4809346567	GO:0060271 Cilium assembly	https://amigo.geneontology.org/amigo/term/GO:0060271	IFT88 WDR19 IQCB1 TTLL3 TTLL1 DRC7 SAXO1 SPAG1
0.013727877	17	1654	2570412555	GO:0120036 Plasma membrane bounded cell projection organization	https://amigo.geneontology.org/amigo/term/GO:0120036	IFT88 SEZ6 LCA5 WDR19 IQCB1 TTLL3 TTLL1 PTPRS STK25 LRP4 HMCN2 DRC7 SCRIB MYLIP SAXO1 SPAG1 DVL3
0.013727877	4	79	1266258337	GO:1905818 Regulation of chromosome separation	https://amigo.geneontology.org/amigo/term/GO:1905818	TEX14 SMC2 NDC80 PLK1
0.015517235	6	231	6495740818	GO:0007286 Spermatid development	https://amigo.geneontology.org/amigo/term/GO:0007286	DMC1 TTLL1 PACRG DRC7 TSSK2 TSSK1B
0.015742327	5	151	828099409	GO:0007052 Mitotic spindle organization	https://amigo.geneontology.org/amigo/term/GO:0007052	EFHC1 STIL KIF23 PLK1 NDC80
0.015742327	9	549	4099770844	GO:0048285 Organelle fission	https://amigo.geneontology.org/amigo/term/GO:0048285	NDC80 DMC1 TEX14 SMC2 KIF23 MSH5 PLK1 NIPBL FOXJ3
0.01645083	13	1089	2985416235	GO:0006259 Dna metabolic process	https://amigo.geneontology.org/amigo/term/GO:0006259	DMC1 MSH6 RPA1 DNA2 NIPBL EXO1 MSH5 PLK1 NOP10 NSD2 FANCI LMNA PARP4
0.01645083	5	155	8067291016	GO:0007127 Meiosis i	https://amigo.geneontology.org/amigo/term/GO:0007127	DMC1 MSH5 NDC80 PLK1 FOXJ3
0.01645083	10	688	3634971243	GO:0007283 Spermatogenesis	https://amigo.geneontology.org/amigo/term/GO:0007283	ZGLP1 DMC1 TTLL1 PACRG MSH6 DRC7 TPPP2 FOXJ3 TSSK2 TSSK1B
0.01645083	15	1394	2691026056	GO:0022402 Cell cycle process	https://amigo.geneontology.org/amigo/term/GO:0022402	NDC80 EFHC1 DMC1 TEX14 STIL SMC2 KIF23 NIPBL PLK1 MSH5 LMNA DNA2 FOXJ3 MSH6 MELK
0.01645083	5	158	7914114605	GO:0035107 Appendage morphogenesis	https://amigo.geneontology.org/amigo/term/GO:0035107	RECK LRP4 WDR19 IQCE NIPBL
0.01645083	5	158	7914114605	GO:0035108 Limb morphogenesis	https://amigo.geneontology.org/amigo/term/GO:0035108	RECK LRP4 WDR19 IQCE NIPBL
0.01645083	6	239	6278310163	GO:0048515 Spermatid differentiation	https://amigo.geneontology.org/amigo/term/GO:0048515	DMC1 TTLL1 PACRG DRC7 TSSK2 TSSK1B
0.01645083	4	88	1136754643	GO:0051304 Chromosome separation	https://amigo.geneontology.org/amigo/term/GO:0051304	TEX14 SMC2 NDC80 PLK1
0.019998509	6	253	5930893791	GO:0000819 Sister chromatid segregation	https://amigo.geneontology.org/amigo/term/GO:0000819	NDC80 TEX14 SMC2 KIF23 PLK1 NIPBL
0.020888335	6	256	5861391129	GO:1902115 Regulation of organelle assembly	https://amigo.geneontology.org/amigo/term/GO:1902115	STIL PLK1 PTPRS IFT88 KIF9 SAXO1
0.021168548	33	4782	1725813197	GO:0030154 Cell differentiation	https://amigo.geneontology.org/amigo/term/GO:0030154	PROM1 IFT88 SEZ6 LRP4 SOX14 FOXD3 ZGLP1 PDCD4 DMC1 TTLL1 SETD6 PTPRS PACRG STK25 RECK GRHL1 HMCN2 LRRK1 DRC7 LMNA RHO NIPBL TPPP2 SCRIB FOXJ3 TSSK2 TSSK1B MYLIP IQCB1 DVL3 MELK KAT6B FGFR3
0.021168548	33	4783	1725452375	GO:0048869 Cellular developmental process	https://amigo.geneontology.org/amigo/term/GO:0048869	PROM1 IFT88 SEZ6 LRP4 SOX14 FOXD3 ZGLP1 PDCD4 DMC1 TTLL1 SETD6 PTPRS PACRG STK25 RECK GRHL1 HMCN2 LRRK1 DRC7 LMNA RHO NIPBL TPPP2 SCRIB FOXJ3 TSSK2 TSSK1B MYLIP IQCB1 DVL3 MELK KAT6B FGFR3
0.027490933	7	377	4643507031	GO:0031647 Regulation of protein stability	https://amigo.geneontology.org/amigo/term/GO:0031647	SAXO1 PLK1 MYLIP NDC80 LMNA DVL3 SPAG1
0.028933966	6	277	5417025737	GO:0001894 Tissue homeostasis	https://amigo.geneontology.org/amigo/term/GO:0001894	PROM1 LRRK1 RHO IQCB1 LCA5 SCRIB
0.028933966	4	106	9437208359	GO:0035082 Axoneme assembly	https://amigo.geneontology.org/amigo/term/GO:0035082	TTLL1 DRC7 SPAG1 TTLL3
0.028933966	6	278	5397540032	GO:0060249 Anatomical structure homeostasis	https://amigo.geneontology.org/amigo/term/GO:0060249	PROM1 LRRK1 RHO IQCB1 LCA5 SCRIB
0.030126511	5	187	6686792019	GO:1902850 Microtubule cytoskeleton organization involved in mitosis	https://amigo.geneontology.org/amigo/term/GO:1902850	EFHC1 STIL KIF23 PLK1 NDC80
0.031334539	5	190	6581211092	GO:0000723 Telomere maintenance	https://amigo.geneontology.org/amigo/term/GO:0000723	RPA1 NOP10 DNA2 LMNA EXO1
0.031334539	3	49	1531138907	GO:0042073 Intraciliary transport	https://amigo.geneontology.org/amigo/term/GO:0042073	IFT88 LCA5 WDR19
0.03299733	3	51	1471094244	GO:0007094 Mitotic spindle assembly checkpoint signaling	https://amigo.geneontology.org/amigo/term/GO:0007094	TEX14 NDC80 PLK1
0.03299733	7	403	4343925932	GO:0007281 Germ cell development	https://amigo.geneontology.org/amigo/term/GO:0007281	ZGLP1 DMC1 TTLL1 PACRG DRC7 TSSK2 TSSK1B
0.03299733	2	13	3847477254	GO:0016446 Somatic hypermutation of immunoglobulin genes	https://amigo.geneontology.org/amigo/term/GO:0016446	MSH6 EXO1
0.03299733	3	52	144280397	GO:0031577 Spindle checkpoint signaling	https://amigo.geneontology.org/amigo/term/GO:0031577	TEX14 NDC80 PLK1
0.03299733	3	53	1415581254	GO:0033046 Negative regulation of sister chromatid segregation	https://amigo.geneontology.org/amigo/term/GO:0033046	TEX14 NDC80 PLK1
0.03299733	3	53	1415581254	GO:0033048 Negative regulation of mitotic sister chromatid segregation	https://amigo.geneontology.org/amigo/term/GO:0033048	TEX14 NDC80 PLK1
0.03299733	3	53	1415581254	GO:0045841 Negative regulation of mitotic metaphase/anaphase transition	https://amigo.geneontology.org/amigo/term/GO:0045841	TEX14 NDC80 PLK1
0.03299733	5	199	628356838	GO:0048736 Appendage development	https://amigo.geneontology.org/amigo/term/GO:0048736	LRP4 RECK WDR19 IQCE NIPBL
0.03299733	5	199	628356838	GO:0060173 Limb development	https://amigo.geneontology.org/amigo/term/GO:0060173	LRP4 RECK WDR19 IQCE NIPBL
0.03299733	3	51	1471094244	GO:0071173 Spindle assembly checkpoint signaling	https://amigo.geneontology.org/amigo/term/GO:0071173	TEX14 NDC80 PLK1
0.03299733	3	51	1471094244	GO:0071174 Mitotic spindle checkpoint signaling	https://amigo.geneontology.org/amigo/term/GO:0071174	TEX14 NDC80 PLK1
0.03299733	3	53	1415581254	GO:2000816 Negative regulation of mitotic sister chromatid separation	https://amigo.geneontology.org/amigo/term/GO:2000816	TEX14 NDC80 PLK1
0.033430988	3	56	1339746544	GO:0002204 Somatic recombination of immunoglobulin genes involved in immune response	https://amigo.geneontology.org/amigo/term/GO:0002204	NSD2 MSH6 EXO1
0.033430988	3	56	1339746544	GO:0002208 Somatic diversification of immunoglobulins involved in immune response	https://amigo.geneontology.org/amigo/term/GO:0002208	NSD2 MSH6 EXO1
0.033430988	2	14	357265745	GO:0002566 Somatic diversification of immune receptors via somatic mutation	https://amigo.geneontology.org/amigo/term/GO:0002566	MSH6 EXO1
0.033430988	12	1092	2748198039	GO:0003006 Developmental process involved in reproduction	https://amigo.geneontology.org/amigo/term/GO:0003006	ZGLP1 DMC1 TTLL1 PACRG MSH6 WDR19 DRC7 TPPP2 FOXJ3 TSSK2 TSSK1B NIPBL
0.033430988	3	56	1339746544	GO:0007140 Male meiotic nuclear division	https://amigo.geneontology.org/amigo/term/GO:0007140	TEX14 DMC1 FOXJ3
0.033430988	4	121	8267306496	GO:0022037 Metencephalon development	https://amigo.geneontology.org/amigo/term/GO:0022037	SEZ6 TTLL1 PTPRS SCRIB
0.033430988	3	56	1339746544	GO:0045190 Isotype switching	https://amigo.geneontology.org/amigo/term/GO:0045190	NSD2 MSH6 EXO1
0.033430988	3	55	1364105572	GO:0051985 Negative regulation of chromosome segregation	https://amigo.geneontology.org/amigo/term/GO:0051985	TEX14 NDC80 PLK1
0.033430988	2	14	357265745	GO:0090435 Protein localization to nuclear envelope	https://amigo.geneontology.org/amigo/term/GO:0090435	LMNA PLK1
0.033430988	6	303	4952198446	GO:0140014 Mitotic nuclear division	https://amigo.geneontology.org/amigo/term/GO:0140014	NDC80 TEX14 SMC2 KIF23 PLK1 NIPBL
0.033430988	3	55	1364105572	GO:1902100 Negative regulation of metaphase/anaphase transition of cell cycle	https://amigo.geneontology.org/amigo/term/GO:1902100	TEX14 NDC80 PLK1
0.033430988	3	55	1364105572	GO:1905819 Negative regulation of chromosome separation	https://amigo.geneontology.org/amigo/term/GO:1905819	TEX14 NDC80 PLK1
0.03489493	2	15	3334480287	GO:0001325 Formation of extrachromosomal circular dna	https://amigo.geneontology.org/amigo/term/GO:0001325	DNA2 EXO1
0.03489493	2	15	3334480287	GO:0090656 T-circle formation	https://amigo.geneontology.org/amigo/term/GO:0090656	DNA2 EXO1
0.03489493	2	15	3334480287	GO:0090737 Telomere maintenance via telomere trimming	https://amigo.geneontology.org/amigo/term/GO:0090737	DNA2 EXO1
0.03489493	10	819	3053553376	GO:1903047 Mitotic cell cycle process	https://amigo.geneontology.org/amigo/term/GO:1903047	NDC80 EFHC1 TEX14 STIL SMC2 KIF23 NIPBL PLK1 DNA2 MELK
0.036005179	4	127	7876725087	GO:0030326 Embryonic limb morphogenesis	https://amigo.geneontology.org/amigo/term/GO:0030326	RECK LRP4 WDR19 NIPBL
0.036005179	3	59	1271623838	GO:0033047 Regulation of mitotic sister chromatid segregation	https://amigo.geneontology.org/amigo/term/GO:0033047	TEX14 NDC80 PLK1
0.036005179	4	127	7876725087	GO:0035113 Embryonic appendage morphogenesis	https://amigo.geneontology.org/amigo/term/GO:0035113	RECK LRP4 WDR19 NIPBL
0.036583706	11	979	2809955298	GO:0000278 Mitotic cell cycle	https://amigo.geneontology.org/amigo/term/GO:0000278	NDC80 EFHC1 TEX14 STIL SMC2 KIF23 NIPBL PLK1 SCRIB DNA2 MELK
0.036583706	3	60	1250430108	GO:0002381 Immunoglobulin production involved in immunoglobulin-mediated immune response	https://amigo.geneontology.org/amigo/term/GO:0002381	NSD2 MSH6 EXO1
0.036583706	2	16	3126075269	GO:0048308 Organelle inheritance	https://amigo.geneontology.org/amigo/term/GO:0048308	STK25 PLK1
0.036583706	2	16	3126075269	GO:0048313 Golgi inheritance	https://amigo.geneontology.org/amigo/term/GO:0048313	STK25 PLK1
0.036583706	2	16	3126075269	GO:1902946 Protein localization to early endosome	https://amigo.geneontology.org/amigo/term/GO:1902946	SCRIB MKLN1
0.037277265	3	61	1229931253	GO:0045839 Negative regulation of mitotic nuclear division	https://amigo.geneontology.org/amigo/term/GO:0045839	TEX14 NDC80 PLK1
0.038677157	3	62	1210093652	GO:0043113 Receptor clustering	https://amigo.geneontology.org/amigo/term/GO:0043113	SCRIB LRP4 WDR19
0.03943143	5	223	5607309899	GO:0032200 Telomere organization	https://amigo.geneontology.org/amigo/term/GO:0032200	RPA1 NOP10 DNA2 LMNA EXO1
0.039678061	7	445	3933937417	GO:0022412 Cellular process involved in reproduction in multicellular organism	https://amigo.geneontology.org/amigo/term/GO:0022412	ZGLP1 DMC1 TTLL1 PACRG DRC7 TSSK2 TSSK1B
0.040010159	6	331	4533281357	GO:0006302 Double-strand break repair	https://amigo.geneontology.org/amigo/term/GO:0006302	DMC1 RPA1 NIPBL DNA2 PLK1 NSD2
0.040010159	5	225	5557467145	GO:0007051 Spindle organization	https://amigo.geneontology.org/amigo/term/GO:0007051	EFHC1 STIL KIF23 PLK1 NDC80
0.040010159	3	64	1172278226	GO:0010965 Regulation of mitotic sister chromatid separation	https://amigo.geneontology.org/amigo/term/GO:0010965	TEX14 NDC80 PLK1
0.040010159	3	64	1172278226	GO:0016447 Somatic recombination of immunoglobulin gene segments	https://amigo.geneontology.org/amigo/term/GO:0016447	NSD2 MSH6 EXO1
0.041139353	4	137	730178165	GO:0051983 Regulation of chromosome segregation	https://amigo.geneontology.org/amigo/term/GO:0051983	TEX14 PLK1 SMC2 NDC80
0.041144593	15	1653	2269383135	GO:0007010 Cytoskeleton organization	https://amigo.geneontology.org/amigo/term/GO:0007010	EFHC1 TTLL1 STIL KIF23 PLK1 TPPP2 NDC80 MKLN1 DRC7 FTCD LMNA RHO SPAG1 TTLL3 DVL3
0.042816828	23	3125	1840633118	GO:0036211 Protein modification process	https://amigo.geneontology.org/amigo/term/GO:0036211	TRAF5 STT3B MYLIP PARP4 SETD6 PTPRS STK25 FANCI GCSH MELK PLK1 TSSK2 TSSK1B FGFR3 TTLL1 TEX14 MED18 LRP4 LRRK1 SOCS6 TTLL3 DVL3 PDCD4
0.043590004	3	67	1119788156	GO:0051306 Mitotic sister chromatid separation	https://amigo.geneontology.org/amigo/term/GO:0051306	TEX14 NDC80 PLK1
0.043590004	3	67	1119788156	GO:0051784 Negative regulation of nuclear division	https://amigo.geneontology.org/amigo/term/GO:0051784	TEX14 NDC80 PLK1
0.043607099	24	3331	1801880671	GO:0043412 Macromolecule modification	https://amigo.geneontology.org/amigo/term/GO:0043412	TRAF5 STT3B NOP10 MYLIP PARP4 SETD6 PTPRS STK25 FANCI GCSH MELK PLK1 TSSK2 TSSK1B FGFR3 TTLL1 TEX14 MED18 LRP4 LRRK1 SOCS6 TTLL3 DVL3 PDCD4
0.044352048	11	1023	2689097005	GO:0006974 Dna damage response	https://amigo.geneontology.org/amigo/term/GO:0006974	DMC1 MSH6 RPA1 NIPBL EXO1 DNA2 PLK1 NSD2 FANCI MSH5 PARP4
0.044591955	2	19	2632484437	GO:0007076 Mitotic chromosome condensation	https://amigo.geneontology.org/amigo/term/GO:0007076	SMC2 PLK1
0.045780678	3	69	1087330528	GO:0016445 Somatic diversification of immunoglobulins	https://amigo.geneontology.org/amigo/term/GO:0016445	NSD2 MSH6 EXO1
0.048928933	17	2047	2076923481	GO:0033554 Cellular response to stress	https://amigo.geneontology.org/amigo/term/GO:0033554	DMC1 MSH6 RPA1 NIPBL EXO1 STK25 DNA2 SAXO1 LMNA PLK1 PTPRS NSD2 FANCI MSH5 STT3B PARP4 PACRG
0.049455678	5	243	5145802912	GO:0007163 Establishment or maintenance of cell polarity	https://amigo.geneontology.org/amigo/term/GO:0007163	SCRIB PLK1 STK25 LMNA NDC80
0.051798937	3	73	1027750773	GO:0002562 Somatic diversification of immune receptors via germline recombination within a single locus	https://amigo.geneontology.org/amigo/term/GO:0002562	NSD2 MSH6 EXO1
0.051798937	3	73	1027750773	GO:0016444 Somatic cell dna recombination	https://amigo.geneontology.org/amigo/term/GO:0016444	NSD2 MSH6 EXO1
0.051798937	2	21	2381771633	GO:0051383 Kinetochore organization	https://amigo.geneontology.org/amigo/term/GO:0051383	NDC80 SMC2
0.053944723	20	2629	1902518231	GO:0051128 Regulation of cellular component organization	https://amigo.geneontology.org/amigo/term/GO:0051128	SEZ6 TEX14 TPPP2 STIL SMC2 PLK1 PTPRS STK25 MKLN1 LRP4 LMNA SCRIB MYLIP IFT88 NDC80 KIF9 RECK SAXO1 DVL3 VPS8
0.055115723	4	154	6495740818	GO:0051225 Spindle assembly	https://amigo.geneontology.org/amigo/term/GO:0051225	KIF23 PLK1 NDC80 STIL
0.05718731	8	625	3201101075	GO:0120031 Plasma membrane bounded cell projection assembly	https://amigo.geneontology.org/amigo/term/GO:0120031	IFT88 WDR19 IQCB1 TTLL3 TTLL1 DRC7 SAXO1 SPAG1
0.058002542	3	77	9743611227	GO:0070192 Chromosome organization involved in meiotic cell cycle	https://amigo.geneontology.org/amigo/term/GO:0070192	DMC1 MSH5 SMC2
0.059209856	11	1077	2554267629	GO:0033365 Protein localization to organelle	https://amigo.geneontology.org/amigo/term/GO:0033365	SPCS2 STIL VPS8 LMNA NIPBL SCRIB RPA1 TAF3 PLK1 MKLN1 WDR19
0.059209856	3	78	9618693135	GO:0045143 Homologous chromosome segregation	https://amigo.geneontology.org/amigo/term/GO:0045143	MSH5 DMC1 PLK1
0.060527736	3	79	9496937526	GO:0002200 Somatic diversification of immune receptors	https://amigo.geneontology.org/amigo/term/GO:0002200	NSD2 MSH6 EXO1
0.060527736	22	3054	1801536501	GO:0048468 Cell development	https://amigo.geneontology.org/amigo/term/GO:0048468	IFT88 SEZ6 ZGLP1 DMC1 TTLL1 PTPRS PACRG STK25 RECK LRP4 HMCN2 PDCD4 LRRK1 DRC7 LMNA SCRIB TSSK2 TSSK1B MYLIP DVL3 MELK KAT6B
0.061748023	8	638	3135874878	GO:0030031 Cell projection assembly	https://amigo.geneontology.org/amigo/term/GO:0030031	IFT88 WDR19 IQCB1 TTLL3 TTLL1 DRC7 SAXO1 SPAG1
0.064507363	28	4287	1633405319	GO:0048731 System development	https://amigo.geneontology.org/amigo/term/GO:0048731	PROM1 IFT88 SEZ6 RECK LRP4 NIPBL SOX14 PDCD4 DMC1 TTLL1 PTPRS NSD2 STK25 MSH6 HMCN2 LRRK1 WDR19 LMNA RHO EXO1 RIC8A SCRIB MYLIP SDHA EFHC1 FGFR3 STIL DVL3
0.066675746	4	166	6026169193	GO:0030902 Hindbrain development	https://amigo.geneontology.org/amigo/term/GO:0030902	SEZ6 TTLL1 PTPRS SCRIB
0.066675746	2	25	2000688172	GO:1901317 Regulation of flagellated sperm motility	https://amigo.geneontology.org/amigo/term/GO:1901317	TPPP2 KIF9
0.067101476	14	1604	2182795699	GO:0048699 Generation of neurons	https://amigo.geneontology.org/amigo/term/GO:0048699	PROM1 IFT88 SEZ6 LRP4 SOX14 TTLL1 PTPRS STK25 HMCN2 RHO NIPBL SCRIB MYLIP DVL3
0.068605715	3	84	8931643625	GO:0170040 Proteinogenic amino acid catabolic process	https://amigo.geneontology.org/amigo/term/GO:0170040	OAT GCSH FTCD
0.07754029	3	88	8525659824	GO:0170035 L-amino acid catabolic process	https://amigo.geneontology.org/amigo/term/GO:0170035	OAT GCSH FTCD
0.080361778	2	28	1786328725	GO:0007141 Male meiosis i	https://amigo.geneontology.org/amigo/term/GO:0007141	DMC1 FOXJ3
0.080361778	2	28	1786328725	GO:0071800 Podosome assembly	https://amigo.geneontology.org/amigo/term/GO:0071800	RHO KIF9
0.08238014	5	285	4387474061	GO:0033044 Regulation of chromosome organization	https://amigo.geneontology.org/amigo/term/GO:0033044	TEX14 SMC2 PLK1 NDC80 LMNA
0.084635806	3	92	8154978962	GO:0002312 B cell activation involved in immune response	https://amigo.geneontology.org/amigo/term/GO:0002312	NSD2 MSH6 EXO1
0.084635806	8	682	293356037	GO:0031344 Regulation of cell projection organization	https://amigo.geneontology.org/amigo/term/GO:0031344	SEZ6 PTPRS STK25 LRP4 MYLIP IFT88 SAXO1 DVL3
0.086087153	8	685	292071266	GO:0043009 Chordate embryonic development	https://amigo.geneontology.org/amigo/term/GO:0043009	NIPBL TTLL1 DHX35 WDR19 RIC8A SCRIB STIL FOXD3
0.087255904	4	183	5466361126	GO:0007292 Female gamete generation	https://amigo.geneontology.org/amigo/term/GO:0007292	ZGLP1 NDC80 DMC1 PLK1
0.088194784	2	30	1667240143	GO:0099637 Neurotransmitter receptor transport	https://amigo.geneontology.org/amigo/term/GO:0099637	SCRIB MKLN1
0.091960802	6	419	3581184079	GO:0001701 In utero embryonic development	https://amigo.geneontology.org/amigo/term/GO:0001701	TTLL1 DHX35 WDR19 RIC8A STIL FOXD3
0.091960802	3	96	7815188172	GO:0030071 Regulation of mitotic metaphase/anaphase transition	https://amigo.geneontology.org/amigo/term/GO:0030071	TEX14 PLK1 NDC80
0.092127216	2	31	1613458203	GO:0021680 Cerebellar purkinje cell layer development	https://amigo.geneontology.org/amigo/term/GO:0021680	SEZ6 TTLL1
0.09431442	3	98	7655694536	GO:0000281 Mitotic cytokinesis	https://amigo.geneontology.org/amigo/term/GO:0000281	EFHC1 PLK1 KIF23
0.09431442	2	32	1563037634	GO:0007288 Sperm axoneme assembly	https://amigo.geneontology.org/amigo/term/GO:0007288	TTLL1 DRC7
0.09431442	8	706	2833835938	GO:0009792 Embryo development ending in birth or egg hatching	https://amigo.geneontology.org/amigo/term/GO:0009792	NIPBL TTLL1 DHX35 WDR19 RIC8A SCRIB STIL FOXD3
0.09431442	13	1516	2144537124	GO:0030182 Neuron differentiation	https://amigo.geneontology.org/amigo/term/GO:0030182	PROM1 IFT88 SEZ6 SOX14 TTLL1 PTPRS STK25 LRP4 HMCN2 RHO SCRIB MYLIP DVL3
0.09431442	2	32	1563037634	GO:0045724 Positive regulation of cilium assembly	https://amigo.geneontology.org/amigo/term/GO:0045724	IFT88 SAXO1
0.09431442	5	300	4168100358	GO:0090596 Sensory organ morphogenesis	https://amigo.geneontology.org/amigo/term/GO:0090596	PROM1 WDR19 RHO SCRIB NIPBL
0.09431442	3	99	7578364288	GO:1902099 Regulation of metaphase/anaphase transition of cell cycle	https://amigo.geneontology.org/amigo/term/GO:1902099	TEX14 PLK1 NDC80
0.09431442	3	99	7578364288	GO:1902117 Positive regulation of organelle assembly	https://amigo.geneontology.org/amigo/term/GO:1902117	STIL IFT88 SAXO1
0.095075097	4	193	5183129979	GO:0000724 Double-strand break repair via homologous recombination	https://amigo.geneontology.org/amigo/term/GO:0000724	DMC1 RPA1 NIPBL PLK1
0.095075097	4	194	5156412815	GO:0006575 Cellular modified amino acid metabolic process	https://amigo.geneontology.org/amigo/term/GO:0006575	GATM GSTT1 DUOX1 FTCD
0.095075097	3	100	7502580645	GO:0007091 Metaphase/anaphase transition of mitotic cell cycle	https://amigo.geneontology.org/amigo/term/GO:0007091	TEX14 PLK1 NDC80
0.095075097	3	100	7502580645	GO:0032465 Regulation of cytokinesis	https://amigo.geneontology.org/amigo/term/GO:0032465	PLK1 TEX14 KIF23
0.095075097	2	33	1515672858	GO:0036010 Protein localization to endosome	https://amigo.geneontology.org/amigo/term/GO:0036010	SCRIB MKLN1
0.095075097	22	3229	1703899806	GO:0048513 Animal organ development	https://amigo.geneontology.org/amigo/term/GO:0048513	PROM1 IFT88 NIPBL SOX14 LRP4 SEZ6 DMC1 TTLL1 PTPRS NSD2 GRHL1 NOM1 PDCD4 LRRK1 WDR19 LMNA RHO SCRIB EFHC1 IQCB1 FGFR3 STIL
0.098207536	11	1197	2298200699	GO:0009790 Embryo development	https://amigo.geneontology.org/amigo/term/GO:0009790	NIPBL TTLL1 DHX35 RECK LRP4 PCSK6 WDR19 RIC8A SCRIB STIL FOXD3
0.098207536	2	34	1471094244	GO:0035115 Embryonic forelimb morphogenesis	https://amigo.geneontology.org/amigo/term/GO:0035115	RECK NIPBL
0.098207536	3	103	7284058879	GO:0044784 Metaphase/anaphase transition of cell cycle	https://amigo.geneontology.org/amigo/term/GO:0044784	TEX14 PLK1 NDC80
0.098207536	2	34	1471094244	GO:0060295 Regulation of cilium movement involved in cell motility	https://amigo.geneontology.org/amigo/term/GO:0060295	TPPP2 KIF9
0.098207536	2	34	1471094244	GO:1902019 Regulation of cilium-dependent cell motility	https://amigo.geneontology.org/amigo/term/GO:1902019	TPPP2 KIF9
0.098220093	4	198	5052242859	GO:0000725 Recombinational repair	https://amigo.geneontology.org/amigo/term/GO:0000725	DMC1 RPA1 NIPBL PLK1
0.101065992	4	200	500172043	GO:0000910 Cytokinesis	https://amigo.geneontology.org/amigo/term/GO:0000910	EFHC1 PLK1 TEX14 KIF23
0.102808375	20	2868	1743975045	GO:0009653 Anatomical structure morphogenesis	https://amigo.geneontology.org/amigo/term/GO:0009653	PROM1 RECK NIPBL FOXD3 TTLL1 PTPRS NSD2 STK25 MKLN1 LRP4 HMCN2 PDCD4 WDR19 RHO RIC8A SCRIB IQCE FGFR3 STIL DVL3
0.103128694	3	106	7077906269	GO:0043648 Dicarboxylic acid metabolic process	https://amigo.geneontology.org/amigo/term/GO:0043648	OAT SDHA FTCD
0.103128694	3	106	7077906269	GO:2001251 Negative regulation of chromosome organization	https://amigo.geneontology.org/amigo/term/GO:2001251	TEX14 NDC80 PLK1
0.103853111	2	36	1389366786	GO:0006536 Glutamate metabolic process	https://amigo.geneontology.org/amigo/term/GO:0006536	OAT FTCD
0.103853111	15	1921	195277997	GO:0048870 Cell motility	https://amigo.geneontology.org/amigo/term/GO:0048870	EFHC1 DRC7 TTLL1 PACRG LMNA EFHB NIPBL SOX14 RIC8A TPPP2 SCRIB DUOX1 RECK KIF9 TTLL3
0.103853111	4	204	490364748	GO:0051302 Regulation of cell division	https://amigo.geneontology.org/amigo/term/GO:0051302	PLK1 TEX14 EFHC1 KIF23
0.103853111	3	107	7011757612	GO:0098869 Cellular oxidant detoxification	https://amigo.geneontology.org/amigo/term/GO:0098869	PRDX6 DUOX1 GSTT1
0.110837871	3	110	6820527859	GO:0033045 Regulation of sister chromatid segregation	https://amigo.geneontology.org/amigo/term/GO:0033045	TEX14 PLK1 NDC80
0.112953835	3	111	6759081662	GO:0021549 Cerebellum development	https://amigo.geneontology.org/amigo/term/GO:0021549	SEZ6 TTLL1 PTPRS
0.113092564	2	38	1316242218	GO:0000132 Establishment of mitotic spindle orientation	https://amigo.geneontology.org/amigo/term/GO:0000132	PLK1 NDC80
0.11444598	3	112	6698732719	GO:1901606 Alpha-amino acid catabolic process	https://amigo.geneontology.org/amigo/term/GO:1901606	OAT GCSH FTCD
0.119394372	3	114	6581211092	GO:0002377 Immunoglobulin production	https://amigo.geneontology.org/amigo/term/GO:0002377	NSD2 MSH6 EXO1
0.121287913	6	466	3219991693	GO:0140694 Non-membrane-bounded organelle assembly	https://amigo.geneontology.org/amigo/term/GO:0140694	KIF23 STIL PLK1 NDC80 RHO KIF9
0.121904214	1	3	8336200717	GO:0002188 Translation reinitiation	https://amigo.geneontology.org/amigo/term/GO:0002188	EIF3A
0.121904214	1	3	8336200717	GO:0003290 Atrial septum secundum morphogenesis	https://amigo.geneontology.org/amigo/term/GO:0003290	NSD2
0.121904214	1	3	8336200717	GO:0009631 Cold acclimation	https://amigo.geneontology.org/amigo/term/GO:0009631	SAXO1
0.121904214	10	1086	2302817878	GO:0009887 Animal organ morphogenesis	https://amigo.geneontology.org/amigo/term/GO:0009887	PROM1 NIPBL NSD2 LRP4 PDCD4 WDR19 RHO SCRIB FGFR3 STIL
0.121904214	12	1431	2097157413	GO:0016310 Phosphorylation	https://amigo.geneontology.org/amigo/term/GO:0016310	STK25 DGKE MELK PLK1 TSSK2 TSSK1B FGFR3 TEX14 LRP4 LRRK1 DVL3 PDCD4
0.121904214	1	3	8336200717	GO:0021747 Cochlear nucleus development	https://amigo.geneontology.org/amigo/term/GO:0021747	SCRIB
0.121904214	11	1263	21781047	GO:0033043 Regulation of organelle organization	https://amigo.geneontology.org/amigo/term/GO:0033043	TEX14 STIL SMC2 PLK1 PTPRS LMNA IFT88 NDC80 KIF9 SAXO1 DVL3
0.121904214	1	3	8336200717	GO:0042335 Cuticle development	https://amigo.geneontology.org/amigo/term/GO:0042335	DUOX1
0.121904214	1	3	8336200717	GO:0043686 Co-translational protein modification	https://amigo.geneontology.org/amigo/term/GO:0043686	STT3B
0.121904214	2	40	1250430108	GO:0060122 Inner ear receptor cell stereocilium organization	https://amigo.geneontology.org/amigo/term/GO:0060122	IFT88 SCRIB
0.121904214	1	3	8336200717	GO:0060938 Epicardium-derived cardiac fibroblast cell differentiation	https://amigo.geneontology.org/amigo/term/GO:0060938	PDCD4
0.121904214	1	3	8336200717	GO:0060939 Epicardium-derived cardiac fibroblast cell development	https://amigo.geneontology.org/amigo/term/GO:0060939	PDCD4
0.121904214	1	3	8336200717	GO:0072139 Glomerular parietal epithelial cell differentiation	https://amigo.geneontology.org/amigo/term/GO:0072139	PROM1
0.121904214	1	3	8336200717	GO:1902990 Mitotic telomere maintenance via semi-conservative replication	https://amigo.geneontology.org/amigo/term/GO:1902990	DNA2
0.123931871	2	42	1190885817	GO:0000578 Embryonic axis specification	https://amigo.geneontology.org/amigo/term/GO:0000578	PCSK6 STIL
0.123931871	2	42	1190885817	GO:0035136 Forelimb morphogenesis	https://amigo.geneontology.org/amigo/term/GO:0035136	RECK NIPBL
0.124003659	19	2764	1719115198	GO:0007399 Nervous system development	https://amigo.geneontology.org/amigo/term/GO:0007399	PROM1 IFT88 SEZ6 LRP4 NIPBL SOX14 TTLL1 PTPRS STK25 RECK HMCN2 WDR19 RHO SCRIB MYLIP SDHA EFHC1 STIL DVL3
0.125449782	4	224	4465821813	GO:0000075 Cell cycle checkpoint signaling	https://amigo.geneontology.org/amigo/term/GO:0000075	TEX14 PLK1 NDC80 DNA2
0.127707358	2	43	1163190798	GO:0090169 Regulation of spindle assembly	https://amigo.geneontology.org/amigo/term/GO:0090169	PLK1 STIL
0.127965226	4	226	4426301266	GO:0099111 Microtubule-based transport	https://amigo.geneontology.org/amigo/term/GO:0099111	IFT88 LCA5 WDR19 TTLL1
0.130579314	3	123	6099659061	GO:0007088 Regulation of mitotic nuclear division	https://amigo.geneontology.org/amigo/term/GO:0007088	TEX14 NDC80 PLK1
0.131481522	2	44	1136754643	GO:0040001 Establishment of mitotic spindle localization	https://amigo.geneontology.org/amigo/term/GO:0040001	PLK1 NDC80
0.133545273	1	4	6252150538	GO:0000730 Dna recombinase assembly	https://amigo.geneontology.org/amigo/term/GO:0000730	DMC1
0.133545273	1	4	6252150538	GO:0002387 Immune response in gut-associated lymphoid tissue	https://amigo.geneontology.org/amigo/term/GO:0002387	TTLL1
0.133545273	1	4	6252150538	GO:0003285 Septum secundum development	https://amigo.geneontology.org/amigo/term/GO:0003285	NSD2
0.133545273	2	47	1064195836	GO:0003352 Regulation of cilium movement	https://amigo.geneontology.org/amigo/term/GO:0003352	TPPP2 KIF9
0.133545273	1	4	6252150538	GO:0006273 Lagging strand elongation	https://amigo.geneontology.org/amigo/term/GO:0006273	DNA2
0.133545273	2	48	104202509	GO:0006284 Base-excision repair	https://amigo.geneontology.org/amigo/term/GO:0006284	RPA1 DNA2
0.133545273	1	4	6252150538	GO:0006600 Creatine metabolic process	https://amigo.geneontology.org/amigo/term/GO:0006600	GATM
0.133545273	1	4	6252150538	GO:0007057 Spindle assembly involved in female meiosis i	https://amigo.geneontology.org/amigo/term/GO:0007057	NDC80
0.133545273	2	47	1064195836	GO:0007143 Female meiotic nuclear division	https://amigo.geneontology.org/amigo/term/GO:0007143	NDC80 PLK1
0.133545273	8	795	2516588896	GO:0007420 Brain development	https://amigo.geneontology.org/amigo/term/GO:0007420	NIPBL SOX14 SEZ6 TTLL1 PTPRS SCRIB EFHC1 STIL
0.133545273	3	125	6002064516	GO:0009063 Amino acid catabolic process	https://amigo.geneontology.org/amigo/term/GO:0009063	OAT GCSH FTCD
0.133545273	1	4	6252150538	GO:0016080 Synaptic vesicle targeting	https://amigo.geneontology.org/amigo/term/GO:0016080	SCRIB
0.133545273	14	1859	1883380474	GO:0022008 Neurogenesis	https://amigo.geneontology.org/amigo/term/GO:0022008	PROM1 IFT88 SEZ6 LRP4 SOX14 TTLL1 PTPRS STK25 HMCN2 RHO NIPBL SCRIB MYLIP DVL3
0.133545273	2	45	1111493429	GO:0030261 Chromosome condensation	https://amigo.geneontology.org/amigo/term/GO:0030261	SMC2 PLK1
0.133545273	1	4	6252150538	GO:0030951 Establishment or maintenance of microtubule cytoskeleton polarity	https://amigo.geneontology.org/amigo/term/GO:0030951	LMNA
0.133545273	1	4	6252150538	GO:0031120 Snrna pseudouridine synthesis	https://amigo.geneontology.org/amigo/term/GO:0031120	NOP10
0.133545273	1	4	6252150538	GO:0032898 Neurotrophin production	https://amigo.geneontology.org/amigo/term/GO:0032898	PCSK6
0.133545273	3	130	5771215881	GO:0042303 Molting cycle	https://amigo.geneontology.org/amigo/term/GO:0042303	LRP4 NOM1 NIPBL
0.133545273	3	130	5771215881	GO:0042633 Hair cycle	https://amigo.geneontology.org/amigo/term/GO:0042633	LRP4 NOM1 NIPBL
0.133545273	5	360	3473416965	GO:0043062 Extracellular structure organization	https://amigo.geneontology.org/amigo/term/GO:0043062	TEX14 RECK P4HA1 RIC8A KIF9
0.133545273	7	648	2701546529	GO:0048598 Embryonic morphogenesis	https://amigo.geneontology.org/amigo/term/GO:0048598	NIPBL RECK LRP4 WDR19 RIC8A SCRIB STIL
0.133545273	2	46	1087330528	GO:0048701 Embryonic cranial skeleton morphogenesis	https://amigo.geneontology.org/amigo/term/GO:0048701	NIPBL WDR19
0.133545273	1	4	6252150538	GO:0060935 Cardiac fibroblast cell differentiation	https://amigo.geneontology.org/amigo/term/GO:0060935	PDCD4
0.133545273	1	4	6252150538	GO:0060936 Cardiac fibroblast cell development	https://amigo.geneontology.org/amigo/term/GO:0060936	PDCD4
0.133545273	1	4	6252150538	GO:0061055 Myotome development	https://amigo.geneontology.org/amigo/term/GO:0061055	WDR19
0.133545273	3	127	5907543815	GO:0061640 Cytoskeleton-dependent cytokinesis	https://amigo.geneontology.org/amigo/term/GO:0061640	EFHC1 PLK1 KIF23
0.133545273	1	4	6252150538	GO:0071932 Replication fork reversal	https://amigo.geneontology.org/amigo/term/GO:0071932	DNA2
0.133545273	6	491	3056040996	GO:0072594 Establishment of protein localization to organelle	https://amigo.geneontology.org/amigo/term/GO:0072594	SPCS2 VPS8 NIPBL SCRIB MKLN1 LMNA
0.133545273	1	4	6252150538	GO:0090210 Regulation of establishment of blood-brain barrier	https://amigo.geneontology.org/amigo/term/GO:0090210	RECK
0.133545273	1	4	6252150538	GO:0090735 Dna repair complex assembly	https://amigo.geneontology.org/amigo/term/GO:0090735	DMC1
0.133545273	1	4	6252150538	GO:0120222 Regulation of blastocyst development	https://amigo.geneontology.org/amigo/term/GO:0120222	TTLL1
0.133545273	1	4	6252150538	GO:1904683 Regulation of metalloendopeptidase activity	https://amigo.geneontology.org/amigo/term/GO:1904683	RECK
0.133545273	1	4	6252150538	GO:1904761 Negative regulation of myofibroblast differentiation	https://amigo.geneontology.org/amigo/term/GO:1904761	PDCD4
0.133545273	1	4	6252150538	GO:2000768 Positive regulation of nephron tubule epithelial cell differentiation	https://amigo.geneontology.org/amigo/term/GO:2000768	PROM1
0.135407428	3	133	5641038079	GO:0010977 Negative regulation of neuron projection development	https://amigo.geneontology.org/amigo/term/GO:0010977	PTPRS LRP4 MYLIP
0.135407428	4	242	4133653248	GO:0043583 Ear development	https://amigo.geneontology.org/amigo/term/GO:0043583	IFT88 WDR19 SCRIB NIPBL
0.135407428	3	133	5641038079	GO:1990748 Cellular detoxification	https://amigo.geneontology.org/amigo/term/GO:1990748	PRDX6 DUOX1 GSTT1
0.136018669	2	49	1020759271	GO:0051294 Establishment of spindle orientation	https://amigo.geneontology.org/amigo/term/GO:0051294	PLK1 NDC80
0.136300874	6	510	2942188488	GO:0051656 Establishment of organelle localization	https://amigo.geneontology.org/amigo/term/GO:0051656	NDC80 TEX14 LMNA PLK1 SCRIB STK25
0.136417069	3	134	559894078	GO:0050000 Chromosome localization	https://amigo.geneontology.org/amigo/term/GO:0050000	NDC80 TEX14 LMNA
0.137429004	5	372	3361371257	GO:0021700 Developmental maturation	https://amigo.geneontology.org/amigo/term/GO:0021700	SEZ6 RECK DMC1 NOM1 FGFR3
0.139508251	11	1332	2065274952	GO:0006468 Protein phosphorylation	https://amigo.geneontology.org/amigo/term/GO:0006468	STK25 MELK PLK1 TSSK2 TSSK1B FGFR3 TEX14 LRP4 LRRK1 DVL3 PDCD4
0.13979283	7	665	2632484437	GO:0120035 Regulation of plasma membrane bounded cell projection organization	https://amigo.geneontology.org/amigo/term/GO:0120035	SEZ6 PTPRS STK25 LRP4 MYLIP IFT88 SAXO1
0.142016985	2	51	9807294961	GO:0031297 Replication fork processing	https://amigo.geneontology.org/amigo/term/GO:0031297	DNA2 EXO1
0.142016985	2	51	9807294961	GO:0045910 Negative regulation of dna recombination	https://amigo.geneontology.org/amigo/term/GO:0045910	MSH6 PLK1
0.142016985	3	137	5476336237	GO:0098773 Skin epidermis development	https://amigo.geneontology.org/amigo/term/GO:0098773	GRHL1 LRP4 NOM1
0.14330367	3	138	5436652641	GO:0042471 Ear morphogenesis	https://amigo.geneontology.org/amigo/term/GO:0042471	WDR19 SCRIB NIPBL
0.146148845	2	52	9618693135	GO:0120316 Sperm flagellum assembly	https://amigo.geneontology.org/amigo/term/GO:0120316	TTLL1 DRC7
0.147402551	1	5	500172043	GO:0019556 L-histidine catabolic process to glutamate and formamide	https://amigo.geneontology.org/amigo/term/GO:0019556	FTCD
0.147402551	1	5	500172043	GO:0019557 L-histidine catabolic process to glutamate and formate	https://amigo.geneontology.org/amigo/term/GO:0019557	FTCD
0.147402551	1	5	500172043	GO:0034021 Response to silicon dioxide	https://amigo.geneontology.org/amigo/term/GO:0034021	IFT88
0.147402551	3	143	5246559892	GO:0034502 Protein localization to chromosome	https://amigo.geneontology.org/amigo/term/GO:0034502	NIPBL RPA1 PLK1
0.147402551	1	5	500172043	GO:0043137 Dna replication removal of rna primer	https://amigo.geneontology.org/amigo/term/GO:0043137	DNA2
0.147402551	1	5	500172043	GO:0043606 Formamide metabolic process	https://amigo.geneontology.org/amigo/term/GO:0043606	FTCD
0.147402551	1	5	500172043	GO:0048496 Maintenance of animal organ identity	https://amigo.geneontology.org/amigo/term/GO:0048496	IQCB1
0.147402551	1	5	500172043	GO:0050960 Detection of temperature stimulus involved in thermoception	https://amigo.geneontology.org/amigo/term/GO:0050960	RHO
0.147402551	1	5	500172043	GO:0051664 Nuclear pore localization	https://amigo.geneontology.org/amigo/term/GO:0051664	LMNA
0.147402551	2	53	9437208359	GO:0060236 Regulation of mitotic spindle organization	https://amigo.geneontology.org/amigo/term/GO:0060236	PLK1 STIL
0.147402551	1	5	500172043	GO:0061824 Cytosolic ciliogenesis	https://amigo.geneontology.org/amigo/term/GO:0061824	IQCB1
0.147402551	1	5	500172043	GO:0075525 Viral translational termination-reinitiation	https://amigo.geneontology.org/amigo/term/GO:0075525	EIF3A
0.147402551	1	5	500172043	GO:0090168 Golgi reassembly	https://amigo.geneontology.org/amigo/term/GO:0090168	STK25
0.147402551	3	143	5246559892	GO:0097237 Cellular response to toxic substance	https://amigo.geneontology.org/amigo/term/GO:0097237	PRDX6 DUOX1 GSTT1
0.147402551	1	5	500172043	GO:1905049 Negative regulation of metallopeptidase activity	https://amigo.geneontology.org/amigo/term/GO:1905049	RECK
0.147402551	1	5	500172043	GO:1905784 Regulation of anaphase-promoting complex-dependent catabolic process	https://amigo.geneontology.org/amigo/term/GO:1905784	PLK1
0.147402551	2	54	9262445241	GO:2001222 Regulation of neuron migration	https://amigo.geneontology.org/amigo/term/GO:2001222	NIPBL SOX14
0.149991864	3	145	5174193548	GO:0000018 Regulation of dna recombination	https://amigo.geneontology.org/amigo/term/GO:0000018	MSH6 PLK1 NSD2
0.149991864	2	55	9094037146	GO:0050771 Negative regulation of axonogenesis	https://amigo.geneontology.org/amigo/term/GO:0050771	PTPRS LRP4
0.149991864	2	55	9094037146	GO:0060119 Inner ear receptor cell development	https://amigo.geneontology.org/amigo/term/GO:0060119	IFT88 SCRIB
0.149991864	8	848	235930209	GO:0060322 Head development	https://amigo.geneontology.org/amigo/term/GO:0060322	NIPBL SOX14 SEZ6 TTLL1 PTPRS SCRIB EFHC1 STIL
0.153947652	2	56	8931643625	GO:0021695 Cerebellar cortex development	https://amigo.geneontology.org/amigo/term/GO:0021695	SEZ6 TTLL1
0.153947652	2	56	8931643625	GO:0031648 Protein destabilization	https://amigo.geneontology.org/amigo/term/GO:0031648	PLK1 MYLIP
0.157987304	4	265	3774883343	GO:0045930 Negative regulation of mitotic cell cycle	https://amigo.geneontology.org/amigo/term/GO:0045930	TEX14 PLK1 SCRIB NDC80
0.157987304	2	57	8774948123	GO:0090224 Regulation of spindle organization	https://amigo.geneontology.org/amigo/term/GO:0090224	PLK1 STIL
0.158292233	1	6	4168100358	GO:0003284 Septum primum development	https://amigo.geneontology.org/amigo/term/GO:0003284	NSD2
0.158292233	1	6	4168100358	GO:0003289 Atrial septum primum morphogenesis	https://amigo.geneontology.org/amigo/term/GO:0003289	NSD2
0.158292233	1	6	4168100358	GO:0006121 Mitochondrial electron transport succinate to ubiquinone	https://amigo.geneontology.org/amigo/term/GO:0006121	SDHA
0.158292233	2	59	8477492254	GO:0007062 Sister chromatid cohesion	https://amigo.geneontology.org/amigo/term/GO:0007062	NIPBL PLK1
0.158292233	3	150	500172043	GO:0007098 Centrosome cycle	https://amigo.geneontology.org/amigo/term/GO:0007098	STIL NDC80 PLK1
0.158292233	1	6	4168100358	GO:0007354 Zygotic determination of anterior/posterior axis embryo	https://amigo.geneontology.org/amigo/term/GO:0007354	PCSK6
0.158292233	2	58	8623655914	GO:0008608 Attachment of spindle microtubules to kinetochore	https://amigo.geneontology.org/amigo/term/GO:0008608	NDC80 TEX14
0.158292233	1	6	4168100358	GO:0009249 Protein lipoylation	https://amigo.geneontology.org/amigo/term/GO:0009249	GCSH
0.158292233	1	6	4168100358	GO:0010032 Meiotic chromosome condensation	https://amigo.geneontology.org/amigo/term/GO:0010032	SMC2
0.158292233	1	6	4168100358	GO:0010616 Negative regulation of cardiac muscle adaptation	https://amigo.geneontology.org/amigo/term/GO:0010616	LMNA
0.158292233	1	6	4168100358	GO:0016321 Female meiosis chromosome segregation	https://amigo.geneontology.org/amigo/term/GO:0016321	PLK1
0.158292233	1	6	4168100358	GO:0032799 Low-density lipoprotein receptor particle metabolic process	https://amigo.geneontology.org/amigo/term/GO:0032799	MYLIP
0.158292233	1	6	4168100358	GO:0032802 Low-density lipoprotein particle receptor catabolic process	https://amigo.geneontology.org/amigo/term/GO:0032802	MYLIP
0.158292233	1	6	4168100358	GO:0032803 Regulation of low-density lipoprotein particle receptor catabolic process	https://amigo.geneontology.org/amigo/term/GO:0032803	MYLIP
0.158292233	1	6	4168100358	GO:0042148 Dna strand invasion	https://amigo.geneontology.org/amigo/term/GO:0042148	DMC1
0.158292233	2	59	8477492254	GO:0045005 Dna-templated dna replication maintenance of fidelity	https://amigo.geneontology.org/amigo/term/GO:0045005	DNA2 EXO1
0.158292233	3	152	4935908319	GO:0050770 Regulation of axonogenesis	https://amigo.geneontology.org/amigo/term/GO:0050770	PTPRS STK25 LRP4
0.158292233	3	153	490364748	GO:0051783 Regulation of nuclear division	https://amigo.geneontology.org/amigo/term/GO:0051783	TEX14 NDC80 PLK1
0.158292233	1	6	4168100358	GO:0060831 Smoothened signaling pathway involved in dorsal/ventral neural tube patterning	https://amigo.geneontology.org/amigo/term/GO:0060831	WDR19
0.158292233	4	266	3760692053	GO:0065004 Protein-dna complex assembly	https://amigo.geneontology.org/amigo/term/GO:0065004	DMC1 KAT6B TAF3 MED18
0.158292233	1	6	4168100358	GO:1903243 Negative regulation of cardiac muscle hypertrophy in response to stress	https://amigo.geneontology.org/amigo/term/GO:1903243	LMNA
0.158292233	1	6	4168100358	GO:1904395 Positive regulation of skeletal muscle acetylcholine-gated channel clustering	https://amigo.geneontology.org/amigo/term/GO:1904395	LRP4
0.158292233	1	6	4168100358	GO:1904760 Regulation of myofibroblast differentiation	https://amigo.geneontology.org/amigo/term/GO:1904760	PDCD4
0.163414242	4	275	3637614858	GO:0003007 Heart morphogenesis	https://amigo.geneontology.org/amigo/term/GO:0003007	NIPBL NSD2 PDCD4 STIL
0.163914408	2	61	8199541689	GO:0006998 Nuclear envelope organization	https://amigo.geneontology.org/amigo/term/GO:0006998	LMNA PLK1
0.163914408	2	61	8199541689	GO:0062237 Protein localization to postsynapse	https://amigo.geneontology.org/amigo/term/GO:0062237	SCRIB MKLN1
0.167290282	1	7	357265745	GO:0002182 Cytoplasmic translational elongation	https://amigo.geneontology.org/amigo/term/GO:0002182	NEMF
0.167290282	1	7	357265745	GO:0006105 Succinate metabolic process	https://amigo.geneontology.org/amigo/term/GO:0006105	SDHA
0.167290282	2	65	7694954508	GO:0007004 Telomere maintenance via telomerase	https://amigo.geneontology.org/amigo/term/GO:0007004	RPA1 NOP10
0.167290282	2	65	7694954508	GO:0007129 Homologous chromosome pairing at meiosis	https://amigo.geneontology.org/amigo/term/GO:0007129	MSH5 DMC1
0.167290282	1	7	357265745	GO:0008315 G2/mi transition of meiotic cell cycle	https://amigo.geneontology.org/amigo/term/GO:0008315	NDC80
0.167290282	2	65	7694954508	GO:0008631 Intrinsic apoptotic signaling pathway in response to oxidative stress	https://amigo.geneontology.org/amigo/term/GO:0008631	MELK STK25
0.167290282	1	7	357265745	GO:0015942 Formate metabolic process	https://amigo.geneontology.org/amigo/term/GO:0015942	FTCD
0.167290282	3	162	463122262	GO:0016064 Immunoglobulin mediated immune response	https://amigo.geneontology.org/amigo/term/GO:0016064	NSD2 MSH6 EXO1
0.167290282	1	7	357265745	GO:0018026 Peptidyl-lysine monomethylation	https://amigo.geneontology.org/amigo/term/GO:0018026	SETD6
0.167290282	3	163	4602810212	GO:0021915 Neural tube development	https://amigo.geneontology.org/amigo/term/GO:0021915	WDR19 SCRIB STIL
0.167290282	1	7	357265745	GO:0030952 Establishment or maintenance of cytoskeleton polarity	https://amigo.geneontology.org/amigo/term/GO:0030952	LMNA
0.167290282	3	163	4602810212	GO:0031023 Microtubule organizing center organization	https://amigo.geneontology.org/amigo/term/GO:0031023	STIL NDC80 PLK1
0.167290282	9	1064	211538928	GO:0031175 Neuron projection development	https://amigo.geneontology.org/amigo/term/GO:0031175	IFT88 SEZ6 PTPRS STK25 LRP4 HMCN2 SCRIB MYLIP DVL3
0.167290282	1	7	357265745	GO:0032466 Negative regulation of cytokinesis	https://amigo.geneontology.org/amigo/term/GO:0032466	TEX14
0.167290282	1	7	357265745	GO:0034087 Establishment of mitotic sister chromatid cohesion	https://amigo.geneontology.org/amigo/term/GO:0034087	NIPBL
0.167290282	1	7	357265745	GO:0036481 Intrinsic apoptotic signaling pathway in response to hydrogen peroxide	https://amigo.geneontology.org/amigo/term/GO:0036481	STK25
0.167290282	1	7	357265745	GO:0048296 Regulation of isotype switching to iga isotypes	https://amigo.geneontology.org/amigo/term/GO:0048296	NSD2
0.167290282	1	7	357265745	GO:0048298 Positive regulation of isotype switching to iga isotypes	https://amigo.geneontology.org/amigo/term/GO:0048298	NSD2
0.167290282	3	162	463122262	GO:0050731 Positive regulation of peptidyl-tyrosine phosphorylation	https://amigo.geneontology.org/amigo/term/GO:0050731	LRP4 LRRK1 FGFR3
0.167290282	1	7	357265745	GO:0051096 Positive regulation of helicase activity	https://amigo.geneontology.org/amigo/term/GO:0051096	MSH6
0.167290282	2	65	7694954508	GO:0051293 Establishment of spindle localization	https://amigo.geneontology.org/amigo/term/GO:0051293	PLK1 NDC80
0.167290282	2	65	7694954508	GO:0060632 Regulation of microtubule-based movement	https://amigo.geneontology.org/amigo/term/GO:0060632	TPPP2 KIF9
0.167290282	1	7	357265745	GO:0061038 Uterus morphogenesis	https://amigo.geneontology.org/amigo/term/GO:0061038	NIPBL
0.167290282	2	65	7694954508	GO:0071168 Protein localization to chromatin	https://amigo.geneontology.org/amigo/term/GO:0071168	NIPBL PLK1
0.167290282	1	7	357265745	GO:0071321 Cellular response to cgmp	https://amigo.geneontology.org/amigo/term/GO:0071321	HCN2
0.167290282	1	7	357265745	GO:0072201 Negative regulation of mesenchymal cell proliferation	https://amigo.geneontology.org/amigo/term/GO:0072201	LMNA
0.167290282	4	280	357265745	GO:0090068 Positive regulation of cell cycle process	https://amigo.geneontology.org/amigo/term/GO:0090068	STIL SMC2 NDC80 KIF23
0.167290282	3	160	4689112903	GO:0098754 Detoxification	https://amigo.geneontology.org/amigo/term/GO:0098754	PRDX6 DUOX1 GSTT1
0.167290282	1	7	357265745	GO:1904393 Regulation of skeletal muscle acetylcholine-gated channel clustering	https://amigo.geneontology.org/amigo/term/GO:1904393	LRP4
0.167290282	1	7	357265745	GO:1990116 Ribosome-associated ubiquitin-dependent protein catabolic process	https://amigo.geneontology.org/amigo/term/GO:1990116	NEMF
0.167290282	1	7	357265745	GO:1990414 Replication-born double-strand break repair via sister chromatid exchange	https://amigo.geneontology.org/amigo/term/GO:1990414	NIPBL
0.167732822	1	8	3126075269	GO:0001955 Blood vessel maturation	https://amigo.geneontology.org/amigo/term/GO:0001955	RECK
0.167732822	1	8	3126075269	GO:0003149 Membranous septum morphogenesis	https://amigo.geneontology.org/amigo/term/GO:0003149	NSD2
0.167732822	3	166	4519626895	GO:0006261 Dna-templated dna replication	https://amigo.geneontology.org/amigo/term/GO:0006261	DNA2 EXO1 RPA1
0.167732822	2	69	7248870189	GO:0006278 Rna-templated dna biosynthetic process	https://amigo.geneontology.org/amigo/term/GO:0006278	RPA1 NOP10
0.167732822	1	8	3126075269	GO:0006561 Proline biosynthetic process	https://amigo.geneontology.org/amigo/term/GO:0006561	OAT
0.167732822	1	8	3126075269	GO:0007077 Mitotic nuclear membrane disassembly	https://amigo.geneontology.org/amigo/term/GO:0007077	PLK1
0.167732822	2	67	7465254373	GO:0007131 Reciprocal meiotic recombination	https://amigo.geneontology.org/amigo/term/GO:0007131	DMC1 MSH5
0.167732822	22	3659	1503660146	GO:0010604 Positive regulation of macromolecule metabolic process	https://amigo.geneontology.org/amigo/term/GO:0010604	TAF3 SOX14 GRHL1 DNA2 FANCI KAT6B DVL3 PLK1 FOXD3 FOXJ3 MYLIP TRAF5 NSD2 LRP4 LRRK1 LMNA NIPBL SCRIB PRDX6 FGFR3 ZGLP1 MED18
0.167732822	1	8	3126075269	GO:0010989 Negative regulation of low-density lipoprotein particle clearance	https://amigo.geneontology.org/amigo/term/GO:0010989	MYLIP
0.167732822	1	8	3126075269	GO:0018095 Protein polyglutamylation	https://amigo.geneontology.org/amigo/term/GO:0018095	TTLL1
0.167732822	1	8	3126075269	GO:0019464 Glycine decarboxylation via glycine cleavage system	https://amigo.geneontology.org/amigo/term/GO:0019464	GCSH
0.167732822	3	164	4574744296	GO:0030010 Establishment of cell polarity	https://amigo.geneontology.org/amigo/term/GO:0030010	PLK1 SCRIB NDC80
0.167732822	4	291	3437608543	GO:0032886 Regulation of microtubule-based process	https://amigo.geneontology.org/amigo/term/GO:0032886	STIL PLK1 TPPP2 KIF9
0.167732822	1	8	3126075269	GO:0034164 Negative regulation of toll-like receptor 9 signaling pathway	https://amigo.geneontology.org/amigo/term/GO:0034164	PTPRS
0.167732822	1	8	3126075269	GO:0040031 Snrna modification	https://amigo.geneontology.org/amigo/term/GO:0040031	NOP10
0.167732822	1	8	3126075269	GO:0043504 Mitochondrial dna repair	https://amigo.geneontology.org/amigo/term/GO:0043504	DNA2
0.167732822	9	1092	2061148529	GO:0044087 Regulation of cellular component biogenesis	https://amigo.geneontology.org/amigo/term/GO:0044087	TPPP2 STIL PLK1 PTPRS LRP4 IFT88 KIF9 SAXO1 VPS8
0.167732822	6	587	2556245535	GO:0044770 Cell cycle phase transition	https://amigo.geneontology.org/amigo/term/GO:0044770	TEX14 STIL PLK1 NDC80 DNA2 MELK
0.167732822	1	8	3126075269	GO:0044806 G-quadruplex dna unwinding	https://amigo.geneontology.org/amigo/term/GO:0044806	DNA2
0.167732822	3	168	4465821813	GO:0044839 Cell cycle g2/m phase transition	https://amigo.geneontology.org/amigo/term/GO:0044839	PLK1 NDC80 MELK
0.167732822	1	8	3126075269	GO:0045003 Double-strand break repair via synthesis-dependent strand annealing	https://amigo.geneontology.org/amigo/term/GO:0045003	DMC1
0.167732822	5	430	2907976994	GO:0045786 Negative regulation of cell cycle	https://amigo.geneontology.org/amigo/term/GO:0045786	TEX14 PLK1 SCRIB NDC80 DNA2
0.167732822	1	8	3126075269	GO:0048290 Isotype switching to iga isotypes	https://amigo.geneontology.org/amigo/term/GO:0048290	NSD2
0.167732822	2	67	7465254373	GO:0048599 Oocyte development	https://amigo.geneontology.org/amigo/term/GO:0048599	ZGLP1 DMC1
0.167732822	1	8	3126075269	GO:0050955 Thermoception	https://amigo.geneontology.org/amigo/term/GO:0050955	RHO
0.167732822	1	8	3126075269	GO:0051683 Establishment of golgi localization	https://amigo.geneontology.org/amigo/term/GO:0051683	STK25
0.167732822	1	8	3126075269	GO:0055129 L-proline biosynthetic process	https://amigo.geneontology.org/amigo/term/GO:0055129	OAT
0.167732822	1	8	3126075269	GO:0060040 Retinal bipolar neuron differentiation	https://amigo.geneontology.org/amigo/term/GO:0060040	RHO
0.167732822	4	289	3461398222	GO:0071695 Anatomical structure maturation	https://amigo.geneontology.org/amigo/term/GO:0071695	RECK DMC1 NOM1 FGFR3
0.167732822	4	288	3473416965	GO:0071824 Protein-dna complex organization	https://amigo.geneontology.org/amigo/term/GO:0071824	DMC1 KAT6B TAF3 MED18
0.167732822	1	8	3126075269	GO:0071896 Protein localization to adherens junction	https://amigo.geneontology.org/amigo/term/GO:0071896	SCRIB
0.167732822	1	8	3126075269	GO:0097240 Chromosome attachment to the nuclear envelope	https://amigo.geneontology.org/amigo/term/GO:0097240	LMNA
0.167732822	1	8	3126075269	GO:0097681 Double-strand break repair via alternative nonhomologous end joining	https://amigo.geneontology.org/amigo/term/GO:0097681	PLK1
0.167732822	1	8	3126075269	GO:0120197 Mucociliary clearance	https://amigo.geneontology.org/amigo/term/GO:0120197	TTLL1
0.167732822	2	67	7465254373	GO:0140527 Reciprocal homologous recombination	https://amigo.geneontology.org/amigo/term/GO:0140527	DMC1 MSH5
0.167732822	1	8	3126075269	GO:0150012 Positive regulation of neuron projection arborization	https://amigo.geneontology.org/amigo/term/GO:0150012	DVL3
0.167732822	1	8	3126075269	GO:0150094 Amyloid-beta clearance by cellular catabolic process	https://amigo.geneontology.org/amigo/term/GO:0150094	LRP4
0.167732822	4	288	3473416965	GO:1901988 Negative regulation of cell cycle phase transition	https://amigo.geneontology.org/amigo/term/GO:1901988	TEX14 PLK1 NDC80 DNA2
0.167732822	1	8	3126075269	GO:1905064 Negative regulation of vascular associated smooth muscle cell differentiation	https://amigo.geneontology.org/amigo/term/GO:1905064	PDCD4
0.167732822	1	8	3126075269	GO:1905821 Positive regulation of chromosome condensation	https://amigo.geneontology.org/amigo/term/GO:1905821	SMC2
0.167732822	1	8	3126075269	GO:1905832 Positive regulation of spindle assembly	https://amigo.geneontology.org/amigo/term/GO:1905832	STIL
0.167732822	1	8	3126075269	GO:2000698 Positive regulation of epithelial cell differentiation involved in kidney development	https://amigo.geneontology.org/amigo/term/GO:2000698	PROM1
0.167966549	7	755	2318678345	GO:0018193 Peptidyl-amino acid modification	https://amigo.geneontology.org/amigo/term/GO:0018193	SETD6 GCSH PLK1 LRP4 LRRK1 FGFR3 TTLL1
0.168062121	3	172	4361965491	GO:0019724 B cell mediated immunity	https://amigo.geneontology.org/amigo/term/GO:0019724	NSD2 MSH6 EXO1
0.168993935	2	70	71453149	GO:0051653 Spindle localization	https://amigo.geneontology.org/amigo/term/GO:0051653	PLK1 NDC80
0.169648401	3	173	4336751818	GO:0048592 Eye morphogenesis	https://amigo.geneontology.org/amigo/term/GO:0048592	PROM1 RHO NIPBL
0.172537512	2	71	7044676662	GO:0009994 Oocyte differentiation	https://amigo.geneontology.org/amigo/term/GO:0009994	ZGLP1 DMC1
0.173733091	3	175	428718894	GO:0007093 Mitotic cell cycle checkpoint signaling	https://amigo.geneontology.org/amigo/term/GO:0007093	TEX14 PLK1 NDC80
0.175942406	2	73	6851671822	GO:0006303 Double-strand break repair via nonhomologous end joining	https://amigo.geneontology.org/amigo/term/GO:0006303	PLK1 NSD2
0.175942406	1	9	2778733572	GO:0006527 Arginine catabolic process	https://amigo.geneontology.org/amigo/term/GO:0006527	OAT
0.175942406	1	9	2778733572	GO:0006546 Glycine catabolic process	https://amigo.geneontology.org/amigo/term/GO:0006546	GCSH
0.175942406	1	9	2778733572	GO:0006548 L-histidine catabolic process	https://amigo.geneontology.org/amigo/term/GO:0006548	FTCD
0.175942406	9	1121	2007827113	GO:0007417 Central nervous system development	https://amigo.geneontology.org/amigo/term/GO:0007417	NIPBL SOX14 SEZ6 TTLL1 PTPRS RECK SCRIB EFHC1 STIL
0.175942406	1	9	2778733572	GO:0014745 Negative regulation of muscle adaptation	https://amigo.geneontology.org/amigo/term/GO:0014745	LMNA
0.175942406	1	9	2778733572	GO:0031118 Rrna pseudouridine synthesis	https://amigo.geneontology.org/amigo/term/GO:0031118	NOP10
0.175942406	1	9	2778733572	GO:0032201 Telomere maintenance via semi-conservative replication	https://amigo.geneontology.org/amigo/term/GO:0032201	DNA2
0.175942406	1	9	2778733572	GO:0032687 Negative regulation of interferon-alpha production	https://amigo.geneontology.org/amigo/term/GO:0032687	PTPRS
0.175942406	1	9	2778733572	GO:0034085 Establishment of sister chromatid cohesion	https://amigo.geneontology.org/amigo/term/GO:0034085	NIPBL
0.175942406	1	9	2778733572	GO:0046601 Positive regulation of centriole replication	https://amigo.geneontology.org/amigo/term/GO:0046601	STIL
0.175942406	2	73	6851671822	GO:0051123 Rna polymerase ii preinitiation complex assembly	https://amigo.geneontology.org/amigo/term/GO:0051123	TAF3 MED18
0.175942406	7	770	2273509286	GO:0051129 Negative regulation of cellular component organization	https://amigo.geneontology.org/amigo/term/GO:0051129	TEX14 PTPRS LRP4 LMNA MYLIP NDC80 PLK1
0.175942406	1	9	2778733572	GO:0052805 Imidazole-containing compound catabolic process	https://amigo.geneontology.org/amigo/term/GO:0052805	FTCD
0.175942406	2	72	6946833931	GO:0060042 Retina morphogenesis in camera-type eye	https://amigo.geneontology.org/amigo/term/GO:0060042	PROM1 RHO
0.175942406	2	73	6851671822	GO:0060113 Inner ear receptor cell differentiation	https://amigo.geneontology.org/amigo/term/GO:0060113	IFT88 SCRIB
0.175942406	1	9	2778733572	GO:0070305 Response to cgmp	https://amigo.geneontology.org/amigo/term/GO:0070305	HCN2
0.175942406	1	9	2778733572	GO:0071169 Establishment of protein localization to chromatin	https://amigo.geneontology.org/amigo/term/GO:0071169	NIPBL
0.175942406	2	74	6759081662	GO:0071901 Negative regulation of protein serine/threonine kinase activity	https://amigo.geneontology.org/amigo/term/GO:0071901	PLK1 PDCD4
0.175942406	1	9	2778733572	GO:1904776 Regulation of protein localization to cell cortex	https://amigo.geneontology.org/amigo/term/GO:1904776	PLK1
0.175942406	1	9	2778733572	GO:1905461 Positive regulation of vascular associated smooth muscle cell apoptotic process	https://amigo.geneontology.org/amigo/term/GO:1905461	PDCD4
0.178969189	2	75	6668960573	GO:0035825 Homologous recombination	https://amigo.geneontology.org/amigo/term/GO:0035825	DMC1 MSH5
0.178969189	2	75	6668960573	GO:0060261 Positive regulation of transcription initiation by rna polymerase ii	https://amigo.geneontology.org/amigo/term/GO:0060261	TAF3 MED18
0.178969189	2	75	6668960573	GO:1904888 Cranial skeletal system development	https://amigo.geneontology.org/amigo/term/GO:1904888	NIPBL WDR19
0.180664264	5	458	2730196741	GO:0010975 Regulation of neuron projection development	https://amigo.geneontology.org/amigo/term/GO:0010975	SEZ6 PTPRS STK25 LRP4 MYLIP
0.181996099	3	183	4099770844	GO:0010970 Transport along microtubule	https://amigo.geneontology.org/amigo/term/GO:0010970	IFT88 LCA5 WDR19
0.184329478	2	78	641246209	GO:0002090 Regulation of receptor internalization	https://amigo.geneontology.org/amigo/term/GO:0002090	MKLN1 SCRIB
0.184329478	1	10	2500860215	GO:0006547 L-histidine metabolic process	https://amigo.geneontology.org/amigo/term/GO:0006547	FTCD
0.184329478	2	78	641246209	GO:0009880 Embryonic pattern specification	https://amigo.geneontology.org/amigo/term/GO:0009880	PCSK6 STIL
0.184329478	1	10	2500860215	GO:0010612 Regulation of cardiac muscle adaptation	https://amigo.geneontology.org/amigo/term/GO:0010612	LMNA
0.184329478	2	78	641246209	GO:0010833 Telomere maintenance via telomere lengthening	https://amigo.geneontology.org/amigo/term/GO:0010833	RPA1 NOP10
0.184329478	3	185	4055448997	GO:0031345 Negative regulation of cell projection organization	https://amigo.geneontology.org/amigo/term/GO:0031345	PTPRS LRP4 MYLIP
0.184329478	1	10	2500860215	GO:0036446 Myofibroblast differentiation	https://amigo.geneontology.org/amigo/term/GO:0036446	PDCD4
0.184329478	2	77	6495740818	GO:0043112 Receptor metabolic process	https://amigo.geneontology.org/amigo/term/GO:0043112	MYLIP SCRIB
0.184329478	2	78	641246209	GO:0044458 Motile cilium assembly	https://amigo.geneontology.org/amigo/term/GO:0044458	TTLL1 DRC7
0.184329478	4	317	3155659577	GO:0048562 Embryonic organ morphogenesis	https://amigo.geneontology.org/amigo/term/GO:0048562	NIPBL WDR19 SCRIB STIL
0.184329478	1	10	2500860215	GO:0051124 Synaptic assembly at neuromuscular junction	https://amigo.geneontology.org/amigo/term/GO:0051124	LRP4
0.184329478	1	10	2500860215	GO:0055015 Ventricular cardiac muscle cell development	https://amigo.geneontology.org/amigo/term/GO:0055015	LMNA
0.184329478	1	10	2500860215	GO:0072488 Ammonium transmembrane transport	https://amigo.geneontology.org/amigo/term/GO:0072488	HCN2
0.184329478	1	10	2500860215	GO:0110025 Dna strand resection involved in replication fork processing	https://amigo.geneontology.org/amigo/term/GO:0110025	EXO1
0.184329478	2	77	6495740818	GO:1902017 Regulation of cilium assembly	https://amigo.geneontology.org/amigo/term/GO:1902017	IFT88 SAXO1
0.184329478	2	78	641246209	GO:1903008 Organelle disassembly	https://amigo.geneontology.org/amigo/term/GO:1903008	NEMF KIF9
0.184329478	1	10	2500860215	GO:1903242 Regulation of cardiac muscle hypertrophy in response to stress	https://amigo.geneontology.org/amigo/term/GO:1903242	LMNA
0.184329478	1	10	2500860215	GO:1903911 Positive regulation of receptor clustering	https://amigo.geneontology.org/amigo/term/GO:1903911	LRP4
0.186182962	14	2104	1664070485	GO:0043933 Protein-containing complex organization	https://amigo.geneontology.org/amigo/term/GO:0043933	DMC1 EIF3A TPPP2 NSD2 KAT6B RHO KIF9 WDR19 NEMF TAF3 SPAG1 MED18 VPS8 PCSK6
0.186566336	23	3988	1442321588	GO:0009893 Positive regulation of metabolic process	https://amigo.geneontology.org/amigo/term/GO:0009893	TAF3 SOX14 GRHL1 DNA2 FANCI KAT6B DVL3 PLK1 FOXD3 FOXJ3 MYLIP TRAF5 NSD2 LRP4 LRRK1 LMNA NIPBL GATM SCRIB PRDX6 FGFR3 ZGLP1 MED18
0.186714196	5	469	2666162276	GO:0044772 Mitotic cell cycle phase transition	https://amigo.geneontology.org/amigo/term/GO:0044772	TEX14 STIL PLK1 NDC80 MELK
0.189543134	7	798	2193737031	GO:0010564 Regulation of cell cycle process	https://amigo.geneontology.org/amigo/term/GO:0010564	TEX14 STIL PLK1 SMC2 NDC80 KIF23 DNA2
0.189543134	2	80	6252150538	GO:0051298 Centrosome duplication	https://amigo.geneontology.org/amigo/term/GO:0051298	STIL NDC80
0.189835914	1	11	2273509286	GO:0002934 Desmosome organization	https://amigo.geneontology.org/amigo/term/GO:0002934	GRHL1
0.189835914	1	11	2273509286	GO:0010985 Negative regulation of lipoprotein particle clearance	https://amigo.geneontology.org/amigo/term/GO:0010985	MYLIP
0.189835914	1	11	2273509286	GO:0021548 Pons development	https://amigo.geneontology.org/amigo/term/GO:0021548	SCRIB
0.189835914	1	11	2273509286	GO:0033504 Floor plate development	https://amigo.geneontology.org/amigo/term/GO:0033504	STIL
0.189835914	1	11	2273509286	GO:0035022 Positive regulation of rac protein signal transduction	https://amigo.geneontology.org/amigo/term/GO:0035022	LRP4
0.189835914	1	11	2273509286	GO:0043615 Astrocyte cell migration	https://amigo.geneontology.org/amigo/term/GO:0043615	SCRIB
0.189835914	10	1342	1863532202	GO:0045944 Positive regulation of transcription by rna polymerase ii	https://amigo.geneontology.org/amigo/term/GO:0045944	TAF3 SOX14 GRHL1 DVL3 FOXD3 FOXJ3 KAT6B NIPBL ZGLP1 MED18
0.189835914	3	192	3907594086	GO:0046777 Protein autophosphorylation	https://amigo.geneontology.org/amigo/term/GO:0046777	STK25 MELK TSSK2
0.189835914	1	11	2273509286	GO:0046834 Lipid phosphorylation	https://amigo.geneontology.org/amigo/term/GO:0046834	DGKE
0.189835914	1	11	2273509286	GO:0048703 Embryonic viscerocranium morphogenesis	https://amigo.geneontology.org/amigo/term/GO:0048703	NIPBL
0.189835914	1	11	2273509286	GO:0051095 Regulation of helicase activity	https://amigo.geneontology.org/amigo/term/GO:0051095	MSH6
0.189835914	1	11	2273509286	GO:0051256 Mitotic spindle midzone assembly	https://amigo.geneontology.org/amigo/term/GO:0051256	KIF23
0.189835914	1	11	2273509286	GO:0070586 Cell-cell adhesion involved in gastrulation	https://amigo.geneontology.org/amigo/term/GO:0070586	RIC8A
0.189835914	1	11	2273509286	GO:0071481 Cellular response to x-ray	https://amigo.geneontology.org/amigo/term/GO:0071481	NIPBL
0.189835914	1	11	2273509286	GO:0072697 Protein localization to cell cortex	https://amigo.geneontology.org/amigo/term/GO:0072697	PLK1
0.189835914	1	11	2273509286	GO:0075522 Ires-dependent viral translational initiation	https://amigo.geneontology.org/amigo/term/GO:0075522	EIF3A
0.189835914	1	11	2273509286	GO:0097104 Postsynaptic membrane assembly	https://amigo.geneontology.org/amigo/term/GO:0097104	LRP4
0.189835914	2	82	6099659061	GO:0097120 Receptor localization to synapse	https://amigo.geneontology.org/amigo/term/GO:0097120	SCRIB MKLN1
0.189835914	1	11	2273509286	GO:0097400 Interleukin-17-mediated signaling pathway	https://amigo.geneontology.org/amigo/term/GO:0097400	TRAF5
0.189835914	5	479	2610501268	GO:1901987 Regulation of cell cycle phase transition	https://amigo.geneontology.org/amigo/term/GO:1901987	TEX14 STIL PLK1 NDC80 DNA2
0.189835914	1	11	2273509286	GO:1904668 Positive regulation of ubiquitin protein ligase activity	https://amigo.geneontology.org/amigo/term/GO:1904668	PLK1
0.189835914	1	11	2273509286	GO:1905048 Regulation of metallopeptidase activity	https://amigo.geneontology.org/amigo/term/GO:1905048	RECK
0.189835914	2	81	6174963494	GO:2000144 Positive regulation of dna-templated transcription initiation	https://amigo.geneontology.org/amigo/term/GO:2000144	TAF3 MED18
0.189835914	1	11	2273509286	GO:2000644 Regulation of receptor catabolic process	https://amigo.geneontology.org/amigo/term/GO:2000644	MYLIP
0.190674054	3	195	3847477254	GO:0170039 Proteinogenic amino acid metabolic process	https://amigo.geneontology.org/amigo/term/GO:0170039	OAT GCSH FTCD
0.19203559	4	331	3022187571	GO:0060070 Canonical wnt signaling pathway	https://amigo.geneontology.org/amigo/term/GO:0060070	LRP4 DVL3 RECK LRRK1
0.193380659	4	332	3013084596	GO:0001822 Kidney development	https://amigo.geneontology.org/amigo/term/GO:0001822	IFT88 LRP4 PROM1 NIPBL
0.193506967	2	84	5954429083	GO:0009064 Glutamine family amino acid metabolic process	https://amigo.geneontology.org/amigo/term/GO:0009064	OAT FTCD
0.193506967	2	84	5954429083	GO:0042490 Mechanoreceptor differentiation	https://amigo.geneontology.org/amigo/term/GO:0042490	IFT88 SCRIB
0.193506967	6	644	2329993989	GO:0051640 Organelle localization	https://amigo.geneontology.org/amigo/term/GO:0051640	NDC80 TEX14 LMNA STK25 PLK1 SCRIB
0.193522894	6	645	2326381595	GO:0007423 Sensory organ development	https://amigo.geneontology.org/amigo/term/GO:0007423	PROM1 IFT88 WDR19 RHO SCRIB NIPBL
0.195133224	1	12	2084050179	GO:0000022 Mitotic spindle elongation	https://amigo.geneontology.org/amigo/term/GO:0000022	KIF23
0.195133224	1	12	2084050179	GO:0035112 Genitalia morphogenesis	https://amigo.geneontology.org/amigo/term/GO:0035112	NIPBL
0.195133224	1	12	2084050179	GO:0043508 Negative regulation of jun kinase activity	https://amigo.geneontology.org/amigo/term/GO:0043508	PDCD4
0.195133224	6	649	2312043342	GO:0044092 Negative regulation of molecular function	https://amigo.geneontology.org/amigo/term/GO:0044092	RECK TAF3 SETD6 EFHB PLK1 PDCD4
0.195133224	1	12	2084050179	GO:0048671 Negative regulation of collateral sprouting	https://amigo.geneontology.org/amigo/term/GO:0048671	PTPRS
0.195133224	1	12	2084050179	GO:0051081 Nuclear membrane disassembly	https://amigo.geneontology.org/amigo/term/GO:0051081	PLK1
0.195133224	2	86	5815953988	GO:0060260 Regulation of transcription initiation by rna polymerase ii	https://amigo.geneontology.org/amigo/term/GO:0060260	TAF3 MED18
0.195133224	1	12	2084050179	GO:0060623 Regulation of chromosome condensation	https://amigo.geneontology.org/amigo/term/GO:0060623	SMC2
0.195133224	1	12	2084050179	GO:0090267 Positive regulation of mitotic cell cycle spindle assembly checkpoint	https://amigo.geneontology.org/amigo/term/GO:0090267	NDC80
0.195133224	1	12	2084050179	GO:0090557 Establishment of endothelial intestinal barrier	https://amigo.geneontology.org/amigo/term/GO:0090557	PTPRS
0.195133224	2	85	5884376977	GO:0097006 Regulation of plasma lipoprotein particle levels	https://amigo.geneontology.org/amigo/term/GO:0097006	MYLIP PCSK6
0.195133224	1	12	2084050179	GO:0097105 Presynaptic membrane assembly	https://amigo.geneontology.org/amigo/term/GO:0097105	LRP4
0.195133224	1	12	2084050179	GO:0098887 Neurotransmitter receptor transport endosome to postsynaptic membrane	https://amigo.geneontology.org/amigo/term/GO:0098887	SCRIB
0.195133224	1	12	2084050179	GO:0099639 Neurotransmitter receptor transport endosome to plasma membrane	https://amigo.geneontology.org/amigo/term/GO:0099639	SCRIB
0.195133224	3	200	3751290323	GO:1901991 Negative regulation of mitotic cell cycle phase transition	https://amigo.geneontology.org/amigo/term/GO:1901991	TEX14 PLK1 NDC80
0.195133224	1	12	2084050179	GO:1903441 Protein localization to ciliary membrane	https://amigo.geneontology.org/amigo/term/GO:1903441	WDR19
0.195133224	1	12	2084050179	GO:1905288 Vascular associated smooth muscle cell apoptotic process	https://amigo.geneontology.org/amigo/term/GO:1905288	PDCD4
0.195133224	1	12	2084050179	GO:1905459 Regulation of vascular associated smooth muscle cell apoptotic process	https://amigo.geneontology.org/amigo/term/GO:1905459	PDCD4
0.195133224	1	12	2084050179	GO:1990918 Double-strand break repair involved in meiotic recombination	https://amigo.geneontology.org/amigo/term/GO:1990918	DMC1
0.195731368	4	339	295086751	GO:0010948 Negative regulation of cell cycle process	https://amigo.geneontology.org/amigo/term/GO:0010948	TEX14 PLK1 NDC80 DNA2
0.196317185	3	202	3714148834	GO:0170033 L-amino acid metabolic process	https://amigo.geneontology.org/amigo/term/GO:0170033	OAT GCSH FTCD
0.199929975	2	88	5683773216	GO:0051591 Response to camp	https://amigo.geneontology.org/amigo/term/GO:0051591	HCN2 DUOX1
0.199929975	4	342	2924982708	GO:0072001 Renal system development	https://amigo.geneontology.org/amigo/term/GO:0072001	IFT88 LRP4 PROM1 NIPBL

## Sheet: May_enrichment_in_females
Enrichment FDR	nGenes	Pathway Genes	Fold Enrichment	Pathway	URL	Genes
0.020979366	7	1089	6229185797	GO:0006259 Dna metabolic process	https://amigo.geneontology.org/amigo/term/GO:0006259	RIF1 HUWE1 EXO1 USP9X EGFR GCH1 PARP4
0.020979366	6	681	8538179148	GO:0006281 Dna repair	https://amigo.geneontology.org/amigo/term/GO:0006281	HUWE1 EXO1 RIF1 USP9X EGFR PARP4
0.020979366	5	475	1020087719	GO:0007409 Axonogenesis	https://amigo.geneontology.org/amigo/term/GO:0007409	MACF1 PTPRS LRP4 USP9X NELL2
0.020979366	9	2047	4260747435	GO:0033554 Cellular response to stress	https://amigo.geneontology.org/amigo/term/GO:0033554	HUWE1 EXO1 RIF1 USP9X EGFR PTPRS GCH1 PARP4 NFE2
0.020979366	6	677	8588626292	GO:0048812 Neuron projection morphogenesis	https://amigo.geneontology.org/amigo/term/GO:0048812	MACF1 PTPRS LRP4 EGFR USP9X NELL2
0.020979366	6	699	8318311874	GO:0048858 Cell projection morphogenesis	https://amigo.geneontology.org/amigo/term/GO:0048858	MACF1 PTPRS LRP4 EGFR USP9X NELL2
0.020979366	6	694	8378242075	GO:0120039 Plasma membrane bounded cell projection morphogenesis	https://amigo.geneontology.org/amigo/term/GO:0120039	MACF1 PTPRS LRP4 EGFR USP9X NELL2
0.020979366	8	1531	5063792728	GO:2000026 Regulation of multicellular organismal development	https://amigo.geneontology.org/amigo/term/GO:2000026	MACF1 PTPRS LRP4 EGFR EPHA1 RNF41 JAK1 TAPT1
0.023569249	13	4545	2771855519	GO:0006950 Response to stress	https://amigo.geneontology.org/amigo/term/GO:0006950	HUWE1 MACF1 LBP EXO1 RIF1 USP9X GCH1 EGFR JAK1 TRAF4 PTPRS PARP4 NFE2
0.023569249	10	2666	3634971243	GO:0050793 Regulation of developmental process	https://amigo.geneontology.org/amigo/term/GO:0050793	MACF1 RIF1 PTPRS LRP4 EGFR EPHA1 RNF41 JAK1 HUWE1 TAPT1
0.024454855	6	890	6533146067	GO:0022603 Regulation of anatomical structure morphogenesis	https://amigo.geneontology.org/amigo/term/GO:0022603	MACF1 PTPRS LRP4 EPHA1 JAK1 HUWE1
0.024454855	3	119	2443067227	GO:0048675 Axon extension	https://amigo.geneontology.org/amigo/term/GO:0048675	MACF1 PTPRS USP9X
0.024454855	11	3355	3177322404	GO:0051239 Regulation of multicellular organismal process	https://amigo.geneontology.org/amigo/term/GO:0051239	LBP MACF1 RIF1 PTPRS GCH1 LRP4 EGFR EPHA1 JAK1 RNF41 TAPT1
0.024454855	5	541	8956407887	GO:0061564 Axon development	https://amigo.geneontology.org/amigo/term/GO:0061564	MACF1 PTPRS LRP4 USP9X NELL2
0.028125375	11	3468	3073793733	GO:0022607 Cellular component assembly	https://amigo.geneontology.org/amigo/term/GO:0022607	MACF1 TAPT1 PWP2 USP9X PTPRS GCH1 LRP4 EPHA1 THSD4 SACS EXO1
0.030726196	5	613	7904431756	GO:0048667 Cell morphogenesis involved in neuron differentiation	https://amigo.geneontology.org/amigo/term/GO:0048667	MACF1 PTPRS LRP4 USP9X NELL2
0.031891319	4	355	1091924883	GO:0002263 Cell activation involved in immune response	https://amigo.geneontology.org/amigo/term/GO:0002263	LBP RIF1 EXO1 JAK1
0.031891319	4	351	1104368471	GO:0002366 Leukocyte activation involved in immune response	https://amigo.geneontology.org/amigo/term/GO:0002366	LBP RIF1 EXO1 JAK1
0.031891319	6	1023	5683773216	GO:0006974 Dna damage response	https://amigo.geneontology.org/amigo/term/GO:0006974	HUWE1 EXO1 RIF1 USP9X EGFR PARP4
0.031891319	3	152	1912664474	GO:0050770 Regulation of axonogenesis	https://amigo.geneontology.org/amigo/term/GO:0050770	MACF1 PTPRS LRP4
0.031891319	8	1931	4014845503	GO:0051240 Positive regulation of multicellular organismal process	https://amigo.geneontology.org/amigo/term/GO:0051240	LBP MACF1 RIF1 GCH1 EGFR EPHA1 JAK1 TAPT1
0.031891319	2	31	6252150538	GO:0090322 Regulation of superoxide metabolic process	https://amigo.geneontology.org/amigo/term/GO:0090322	EGFR GCH1
0.032111744	6	1039	5596246391	GO:0000902 Cell morphogenesis	https://amigo.geneontology.org/amigo/term/GO:0000902	MACF1 PTPRS LRP4 EGFR USP9X NELL2
0.032126211	3	157	1851751592	GO:2000377 Regulation of reactive oxygen species metabolic process	https://amigo.geneontology.org/amigo/term/GO:2000377	EGFR GCH1 RNF41
0.032978736	6	1064	5464755639	GO:0031175 Neuron projection development	https://amigo.geneontology.org/amigo/term/GO:0031175	MACF1 PTPRS LRP4 EGFR USP9X NELL2
0.032978736	10	3125	3101066667	GO:0036211 Protein modification process	https://amigo.geneontology.org/amigo/term/GO:0036211	HUWE1 USP9X RNF41 TRAF4 PARP4 PTPRS EGFR EPHA1 LRP4 JAK1
0.033135655	11	3775	2823818985	GO:0044085 Cellular component biogenesis	https://amigo.geneontology.org/amigo/term/GO:0044085	MACF1 TAPT1 PWP2 USP9X PTPRS GCH1 LRP4 EPHA1 THSD4 SACS EXO1
0.033135655	6	1092	53246337	GO:0044087 Regulation of cellular component biogenesis	https://amigo.geneontology.org/amigo/term/GO:0044087	MACF1 TAPT1 PTPRS LRP4 EPHA1 SACS
0.033135655	4	396	9788720539	GO:0050767 Regulation of neurogenesis	https://amigo.geneontology.org/amigo/term/GO:0050767	MACF1 PTPRS LRP4 EGFR
0.036403134	9	2629	3317516166	GO:0051128 Regulation of cellular component organization	https://amigo.geneontology.org/amigo/term/GO:0051128	MACF1 TAPT1 EGFR PTPRS GCH1 LRP4 EPHA1 HUWE1 SACS
0.036403134	3	179	1624162011	GO:1990138 Neuron projection extension	https://amigo.geneontology.org/amigo/term/GO:1990138	MACF1 PTPRS USP9X
0.038955698	11	3920	2719366497	GO:0006996 Organelle organization	https://amigo.geneontology.org/amigo/term/GO:0006996	RIF1 HUWE1 MACF1 TAPT1 PWP2 USP9X PTPRS GCH1 EPHA1 HMCN1 EXO1
0.040633465	3	190	1530131579	GO:0000723 Telomere maintenance	https://amigo.geneontology.org/amigo/term/GO:0000723	RIF1 GCH1 EXO1
0.042115622	10	3331	2909286501	GO:0043412 Macromolecule modification	https://amigo.geneontology.org/amigo/term/GO:0043412	HUWE1 USP9X RNF41 TRAF4 PARP4 PTPRS EGFR EPHA1 LRP4 JAK1
0.042852165	7	1654	4101320032	GO:0120036 Plasma membrane bounded cell projection organization	https://amigo.geneontology.org/amigo/term/GO:0120036	TAPT1 USP9X MACF1 PTPRS LRP4 EGFR NELL2
0.046263405	2	56	3461011905	GO:0002204 Somatic recombination of immunoglobulin genes involved in immune response	https://amigo.geneontology.org/amigo/term/GO:0002204	RIF1 EXO1
0.046263405	2	56	3461011905	GO:0002208 Somatic diversification of immunoglobulins involved in immune response	https://amigo.geneontology.org/amigo/term/GO:0002208	RIF1 EXO1
0.046263405	3	215	1352209302	GO:0007623 Circadian rhythm	https://amigo.geneontology.org/amigo/term/GO:0007623	EGFR HUWE1 USP9X
0.046263405	9	2868	3041056485	GO:0009653 Anatomical structure morphogenesis	https://amigo.geneontology.org/amigo/term/GO:0009653	EPHA1 MACF1 PTPRS LRP4 EGFR JAK1 HUWE1 USP9X NELL2
0.046263405	7	1699	3992691779	GO:0030030 Cell projection organization	https://amigo.geneontology.org/amigo/term/GO:0030030	TAPT1 USP9X MACF1 PTPRS LRP4 EGFR NELL2
0.046263405	3	223	1303699552	GO:0032200 Telomere organization	https://amigo.geneontology.org/amigo/term/GO:0032200	RIF1 GCH1 EXO1
0.046263405	2	51	3800326797	GO:0042311 Vasodilation	https://amigo.geneontology.org/amigo/term/GO:0042311	GCH1 EGFR
0.046263405	2	56	3461011905	GO:0045190 Isotype switching	https://amigo.geneontology.org/amigo/term/GO:0045190	RIF1 EXO1
0.046263405	6	1233	4715733982	GO:0048666 Neuron development	https://amigo.geneontology.org/amigo/term/GO:0048666	MACF1 PTPRS LRP4 EGFR USP9X NELL2
0.046263405	2	55	3523939394	GO:0050771 Negative regulation of axonogenesis	https://amigo.geneontology.org/amigo/term/GO:0050771	PTPRS LRP4
0.046263405	4	478	8109483961	GO:0051960 Regulation of nervous system development	https://amigo.geneontology.org/amigo/term/GO:0051960	MACF1 PTPRS LRP4 EGFR
0.048796078	2	60	3230277778	GO:0002381 Immunoglobulin production involved in immunoglobulin-mediated immune response	https://amigo.geneontology.org/amigo/term/GO:0002381	RIF1 EXO1
0.048796078	7	1796	3777050854	GO:0007155 Cell adhesion	https://amigo.geneontology.org/amigo/term/GO:0007155	PTPRS MACF1 HMCN1 EPHA1 EPDR1 JAK1 EGFR
0.048796078	4	509	7615586117	GO:0016049 Cell growth	https://amigo.geneontology.org/amigo/term/GO:0016049	MACF1 EGFR PTPRS USP9X
0.048796078	3	234	124241453	GO:0048588 Developmental cell growth	https://amigo.geneontology.org/amigo/term/GO:0048588	MACF1 PTPRS USP9X
0.050545559	2	64	3028385417	GO:0016447 Somatic recombination of immunoglobulin gene segments	https://amigo.geneontology.org/amigo/term/GO:0016447	RIF1 EXO1
0.050545559	11	4287	2486567919	GO:0048731 System development	https://amigo.geneontology.org/amigo/term/GO:0048731	LRP4 EGFR EPHA1 MACF1 RIF1 PTPRS TAPT1 EXO1 NELL2 JAK1 USP9X
0.050545559	3	245	1186632653	GO:0072593 Reactive oxygen species metabolic process	https://amigo.geneontology.org/amigo/term/GO:0072593	EGFR GCH1 RNF41
0.050545559	4	527	7355471221	GO:0090066 Regulation of anatomical structure size	https://amigo.geneontology.org/amigo/term/GO:0090066	MACF1 PTPRS GCH1 EGFR
0.050545559	4	525	7383492063	GO:1903829 Positive regulation of protein localization	https://amigo.geneontology.org/amigo/term/GO:1903829	HUWE1 EGFR JAK1 LRP4
0.05139243	3	248	1172278226	GO:0060560 Developmental growth involved in morphogenesis	https://amigo.geneontology.org/amigo/term/GO:0060560	MACF1 PTPRS USP9X
0.052024305	6	1362	4269089574	GO:0001775 Cell activation	https://amigo.geneontology.org/amigo/term/GO:0001775	LBP RIF1 EGFR EXO1 RNF41 JAK1
0.052024305	5	915	5295537341	GO:0060284 Regulation of cell development	https://amigo.geneontology.org/amigo/term/GO:0060284	MACF1 PTPRS LRP4 EGFR RNF41
0.052209096	3	254	1144586614	GO:0002285 Lymphocyte activation involved in immune response	https://amigo.geneontology.org/amigo/term/GO:0002285	RIF1 EXO1 JAK1
0.052389305	2	73	2655022831	GO:0002562 Somatic diversification of immune receptors via germline recombination within a single locus	https://amigo.geneontology.org/amigo/term/GO:0002562	RIF1 EXO1
0.052389305	2	73	2655022831	GO:0006801 Superoxide metabolic process	https://amigo.geneontology.org/amigo/term/GO:0006801	EGFR GCH1
0.052389305	3	260	1118173077	GO:0007160 Cell-matrix adhesion	https://amigo.geneontology.org/amigo/term/GO:0007160	MACF1 EPHA1 EPDR1
0.052389305	2	73	2655022831	GO:0016444 Somatic cell dna recombination	https://amigo.geneontology.org/amigo/term/GO:0016444	RIF1 EXO1
0.052389305	2	69	2808937198	GO:0016445 Somatic diversification of immunoglobulins	https://amigo.geneontology.org/amigo/term/GO:0016445	RIF1 EXO1
0.052389305	3	268	1084794776	GO:0018108 Peptidyl-tyrosine phosphorylation	https://amigo.geneontology.org/amigo/term/GO:0018108	EGFR EPHA1 LRP4
0.052389305	3	270	1076759259	GO:0018212 Peptidyl-tyrosine modification	https://amigo.geneontology.org/amigo/term/GO:0018212	EGFR EPHA1 LRP4
0.052389305	5	960	5047309028	GO:0040007 Growth	https://amigo.geneontology.org/amigo/term/GO:0040007	MACF1 EGFR PTPRS LRP4 USP9X
0.052389305	9	3054	2855844794	GO:0048468 Cell development	https://amigo.geneontology.org/amigo/term/GO:0048468	MACF1 PTPRS LRP4 EGFR RNF41 USP9X NELL2 TAPT1 JAK1
0.052389305	4	566	6848645465	GO:0080135 Regulation of cellular response to stress	https://amigo.geneontology.org/amigo/term/GO:0080135	RIF1 EGFR PTPRS GCH1
0.052389305	2	73	2655022831	GO:2000379 Positive regulation of reactive oxygen species metabolic process	https://amigo.geneontology.org/amigo/term/GO:2000379	EGFR RNF41
0.057485907	2	79	2453375527	GO:0002200 Somatic diversification of immune receptors	https://amigo.geneontology.org/amigo/term/GO:0002200	RIF1 EXO1
0.057485907	6	1449	4012767426	GO:0051094 Positive regulation of developmental process	https://amigo.geneontology.org/amigo/term/GO:0051094	MACF1 RIF1 EGFR EPHA1 JAK1 TAPT1
0.057485907	3	283	102729682	GO:1901888 Regulation of cell junction assembly	https://amigo.geneontology.org/amigo/term/GO:1901888	MACF1 PTPRS LRP4
0.057770673	1	3	3230277778	GO:0014916 Regulation of lung blood pressure	https://amigo.geneontology.org/amigo/term/GO:0014916	GCH1
0.057770673	1	3	3230277778	GO:1903012 Positive regulation of bone development	https://amigo.geneontology.org/amigo/term/GO:1903012	TAPT1
0.064865914	5	1028	4713440337	GO:0007167 Enzyme-linked receptor protein signaling pathway	https://amigo.geneontology.org/amigo/term/GO:0007167	EPHA1 JAK1 USP9X EGFR LRP4
0.065917568	5	1035	4681561997	GO:0030334 Regulation of cell migration	https://amigo.geneontology.org/amigo/term/GO:0030334	MACF1 EPHA1 LBP EGFR RNF41
0.066275241	6	1516	3835422164	GO:0030182 Neuron differentiation	https://amigo.geneontology.org/amigo/term/GO:0030182	MACF1 PTPRS LRP4 EGFR USP9X NELL2
0.067093269	2	89	2177715356	GO:0030516 Regulation of axon extension	https://amigo.geneontology.org/amigo/term/GO:0030516	MACF1 PTPRS
0.067476735	2	92	2106702899	GO:0002312 B cell activation involved in immune response	https://amigo.geneontology.org/amigo/term/GO:0002312	RIF1 EXO1
0.067476735	1	4	2422708333	GO:0033590 Response to cobalamin	https://amigo.geneontology.org/amigo/term/GO:0033590	EGFR
0.067476735	7	2079	3262906846	GO:0044419 Biological process involved in interspecies interaction between organisms	https://amigo.geneontology.org/amigo/term/GO:0044419	LBP GCH1 JAK1 TRAF4 HMCN1 EGFR PTPRS
0.067476735	3	310	9378225806	GO:0048511 Rhythmic process	https://amigo.geneontology.org/amigo/term/GO:0048511	HUWE1 USP9X EGFR
0.067476735	3	318	9142295597	GO:0051054 Positive regulation of dna metabolic process	https://amigo.geneontology.org/amigo/term/GO:0051054	RIF1 EGFR GCH1
0.067476735	2	91	212985348	GO:0099068 Postsynapse assembly	https://amigo.geneontology.org/amigo/term/GO:0099068	PTPRS LRP4
0.067476735	1	4	2422708333	GO:1990764 Myofibroblast contraction	https://amigo.geneontology.org/amigo/term/GO:1990764	EPDR1
0.06780642	5	1072	4519978234	GO:0044093 Positive regulation of molecular function	https://amigo.geneontology.org/amigo/term/GO:0044093	TRAF4 GCH1 EGFR EPHA1 USP9X
0.070861603	2	99	1957744108	GO:0001942 Hair follicle development	https://amigo.geneontology.org/amigo/term/GO:0001942	LRP4 EGFR
0.070861603	2	102	1900163399	GO:0022404 Molting cycle process	https://amigo.geneontology.org/amigo/term/GO:0022404	LRP4 EGFR
0.070861603	2	102	1900163399	GO:0022405 Hair cycle process	https://amigo.geneontology.org/amigo/term/GO:0022405	LRP4 EGFR
0.070861603	4	682	5683773216	GO:0031344 Regulation of cell projection organization	https://amigo.geneontology.org/amigo/term/GO:0031344	TAPT1 MACF1 PTPRS LRP4
0.070861603	4	685	5658880779	GO:0031401 Positive regulation of protein modification process	https://amigo.geneontology.org/amigo/term/GO:0031401	TRAF4 HUWE1 EGFR LRP4
0.070861603	8	2719	2851293368	GO:0048584 Positive regulation of response to stimulus	https://amigo.geneontology.org/amigo/term/GO:0048584	TRAF4 RIF1 USP9X LBP EGFR LRP4 PTPRS MACF1
0.070861603	4	678	5717305801	GO:0048589 Developmental growth	https://amigo.geneontology.org/amigo/term/GO:0048589	MACF1 PTPRS LRP4 USP9X
0.070861603	6	1604	3625	GO:0048699 Generation of neurons	https://amigo.geneontology.org/amigo/term/GO:0048699	LRP4 MACF1 PTPRS EGFR USP9X NELL2
0.070861603	7	2141	3168418185	GO:0051246 Regulation of protein metabolic process	https://amigo.geneontology.org/amigo/term/GO:0051246	TRAF4 HUWE1 EGFR EPHA1 LRP4 USP9X RNF41
0.070861603	4	665	5829072682	GO:0120035 Regulation of plasma membrane bounded cell projection organization	https://amigo.geneontology.org/amigo/term/GO:0120035	TAPT1 MACF1 PTPRS LRP4
0.070861603	5	1098	4412947784	GO:2000145 Regulation of cell motility	https://amigo.geneontology.org/amigo/term/GO:2000145	MACF1 EPHA1 LBP EGFR RNF41
0.070995953	5	1125	4307037037	GO:0031399 Regulation of protein modification process	https://amigo.geneontology.org/amigo/term/GO:0031399	TRAF4 HUWE1 EGFR EPHA1 LRP4
0.070995953	1	5	1938166667	GO:0033594 Response to hydroxyisoflavone	https://amigo.geneontology.org/amigo/term/GO:0033594	EGFR
0.070995953	1	5	1938166667	GO:0061824 Cytosolic ciliogenesis	https://amigo.geneontology.org/amigo/term/GO:0061824	USP9X
0.070995953	1	5	1938166667	GO:1904515 Positive regulation of torc2 signaling	https://amigo.geneontology.org/amigo/term/GO:1904515	USP9X
0.071267508	3	346	8402456647	GO:0030111 Regulation of wnt signaling pathway	https://amigo.geneontology.org/amigo/term/GO:0030111	LRP4 EGFR MACF1
0.071656997	2	106	1828459119	GO:0061387 Regulation of extent of cell growth	https://amigo.geneontology.org/amigo/term/GO:0061387	MACF1 PTPRS
0.072712251	2	114	1700146199	GO:0002377 Immunoglobulin production	https://amigo.geneontology.org/amigo/term/GO:0002377	RIF1 EXO1
0.072712251	7	2241	3027034062	GO:0006952 Defense response	https://amigo.geneontology.org/amigo/term/GO:0006952	LBP GCH1 JAK1 TRAF4 EGFR PARP4 PTPRS
0.072712251	6	1655	3513293051	GO:0016477 Cell migration	https://amigo.geneontology.org/amigo/term/GO:0016477	USP9X MACF1 EPHA1 LBP EGFR RNF41
0.072712251	5	1153	4202442903	GO:0030163 Protein catabolic process	https://amigo.geneontology.org/amigo/term/GO:0030163	HUWE1 EGFR RNF41 TRAF4 USP9X
0.072712251	1	6	1615138889	GO:0038154 Interleukin-11-mediated signaling pathway	https://amigo.geneontology.org/amigo/term/GO:0038154	JAK1
0.072712251	5	1146	4228112275	GO:0040012 Regulation of locomotion	https://amigo.geneontology.org/amigo/term/GO:0040012	MACF1 EPHA1 LBP EGFR RNF41
0.072712251	4	713	5436652641	GO:0043085 Positive regulation of catalytic activity	https://amigo.geneontology.org/amigo/term/GO:0043085	TRAF4 GCH1 EGFR EPHA1
0.072712251	1	6	1615138889	GO:0046654 Tetrahydrofolate biosynthetic process	https://amigo.geneontology.org/amigo/term/GO:0046654	GCH1
0.072712251	1	6	1615138889	GO:0070257 Positive regulation of mucus secretion	https://amigo.geneontology.org/amigo/term/GO:0070257	EGFR
0.072712251	1	6	1615138889	GO:0070459 Prolactin secretion	https://amigo.geneontology.org/amigo/term/GO:0070459	EGFR
0.072712251	1	6	1615138889	GO:0080184 Response to phenylpropanoid	https://amigo.geneontology.org/amigo/term/GO:0080184	EGFR
0.072712251	1	6	1615138889	GO:1900019 Regulation of protein kinase c activity	https://amigo.geneontology.org/amigo/term/GO:1900019	EGFR
0.072712251	1	6	1615138889	GO:1900020 Positive regulation of protein kinase c activity	https://amigo.geneontology.org/amigo/term/GO:1900020	EGFR
0.072712251	1	6	1615138889	GO:1904395 Positive regulation of skeletal muscle acetylcholine-gated channel clustering	https://amigo.geneontology.org/amigo/term/GO:1904395	LRP4
0.072712251	1	6	1615138889	GO:2000121 Regulation of removal of superoxide radicals	https://amigo.geneontology.org/amigo/term/GO:2000121	GCH1
0.07396832	2	116	1670833333	GO:1905477 Positive regulation of protein localization to membrane	https://amigo.geneontology.org/amigo/term/GO:1905477	EGFR LRP4
0.07447665	5	1185	4088959212	GO:0045321 Leukocyte activation	https://amigo.geneontology.org/amigo/term/GO:0045321	LBP RIF1 EXO1 RNF41 JAK1
0.076816725	3	454	6403634361	GO:0001503 Ossification	https://amigo.geneontology.org/amigo/term/GO:0001503	TAPT1 LRP4 EGFR
0.076816725	3	428	6792640187	GO:0001558 Regulation of cell growth	https://amigo.geneontology.org/amigo/term/GO:0001558	MACF1 EGFR PTPRS
0.076816725	4	836	463676236	GO:0001932 Regulation of protein phosphorylation	https://amigo.geneontology.org/amigo/term/GO:0001932	TRAF4 EGFR EPHA1 LRP4
0.076816725	2	128	1514192708	GO:0001952 Regulation of cell-matrix adhesion	https://amigo.geneontology.org/amigo/term/GO:0001952	MACF1 EPHA1
0.076816725	1	9	1076759259	GO:0002232 Leukocyte chemotaxis involved in inflammatory response	https://amigo.geneontology.org/amigo/term/GO:0002232	LBP
0.076816725	4	828	4681561997	GO:0002252 Immune effector process	https://amigo.geneontology.org/amigo/term/GO:0002252	LBP RIF1 EXO1 JAK1
0.076816725	3	400	7268125	GO:0002460 Adaptive immune response based on somatic recombination of immune receptors built from immunoglobulin superfamily domains	https://amigo.geneontology.org/amigo/term/GO:0002460	RIF1 EXO1 JAK1
0.076816725	1	10	9690833333	GO:0002536 Respiratory burst involved in inflammatory response	https://amigo.geneontology.org/amigo/term/GO:0002536	LBP
0.076816725	1	11	8809848485	GO:0006307 Dna alkylation repair	https://amigo.geneontology.org/amigo/term/GO:0006307	USP9X
0.076816725	5	1332	36377002	GO:0006468 Protein phosphorylation	https://amigo.geneontology.org/amigo/term/GO:0006468	TRAF4 EGFR EPHA1 LRP4 JAK1
0.076816725	1	7	1384404762	GO:0006729 Tetrahydrobiopterin biosynthetic process	https://amigo.geneontology.org/amigo/term/GO:0006729	GCH1
0.076816725	7	2468	2748615613	GO:0006955 Immune response	https://amigo.geneontology.org/amigo/term/GO:0006955	LBP GCH1 JAK1 TRAF4 RIF1 EXO1 PTPRS
0.076816725	8	3099	2501667204	GO:0007166 Cell surface receptor signaling pathway	https://amigo.geneontology.org/amigo/term/GO:0007166	LBP LRP4 EPHA1 JAK1 USP9X EGFR RNF41 MACF1
0.076816725	1	8	1211354167	GO:0009396 Folic acid-containing compound biosynthetic process	https://amigo.geneontology.org/amigo/term/GO:0009396	GCH1
0.076816725	8	3115	2488817549	GO:0009892 Negative regulation of metabolic process	https://amigo.geneontology.org/amigo/term/GO:0009892	RIF1 LBP EGFR EPHA1 GCH1 RNF41 PTPRS USP9X
0.076816725	3	404	7196163366	GO:0009895 Negative regulation of catabolic process	https://amigo.geneontology.org/amigo/term/GO:0009895	EGFR RNF41 USP9X
0.076816725	6	1723	3374637261	GO:0009967 Positive regulation of signal transduction	https://amigo.geneontology.org/amigo/term/GO:0009967	TRAF4 USP9X LBP EGFR LRP4 MACF1
0.076816725	9	3659	2383643072	GO:0010604 Positive regulation of macromolecule metabolic process	https://amigo.geneontology.org/amigo/term/GO:0010604	TRAF4 RIF1 HUWE1 LBP EGFR GCH1 LRP4 RNF41 NFE2
0.076816725	1	8	1211354167	GO:0010637 Negative regulation of mitochondrial fusion	https://amigo.geneontology.org/amigo/term/GO:0010637	HUWE1
0.076816725	3	458	6347707424	GO:0010975 Regulation of neuron projection development	https://amigo.geneontology.org/amigo/term/GO:0010975	MACF1 PTPRS LRP4
0.076816725	2	133	145726817	GO:0010977 Negative regulation of neuron projection development	https://amigo.geneontology.org/amigo/term/GO:0010977	PTPRS LRP4
0.076816725	1	8	1211354167	GO:0016562 Protein import into peroxisome matrix receptor recycling	https://amigo.geneontology.org/amigo/term/GO:0016562	USP9X
0.076816725	2	146	1327511416	GO:0021987 Cerebral cortex development	https://amigo.geneontology.org/amigo/term/GO:0021987	PTPRS EGFR
0.076816725	6	1859	3127756859	GO:0022008 Neurogenesis	https://amigo.geneontology.org/amigo/term/GO:0022008	LRP4 EGFR MACF1 PTPRS USP9X NELL2
0.076816725	2	151	1283554084	GO:0030177 Positive regulation of wnt signaling pathway	https://amigo.geneontology.org/amigo/term/GO:0030177	EGFR MACF1
0.076816725	1	10	9690833333	GO:0031509 Subtelomeric heterochromatin formation	https://amigo.geneontology.org/amigo/term/GO:0031509	RIF1
0.076816725	3	383	759073107	GO:0031589 Cell-substrate adhesion	https://amigo.geneontology.org/amigo/term/GO:0031589	MACF1 EPHA1 EPDR1
0.076816725	1	9	1076759259	GO:0032687 Negative regulation of interferon-alpha production	https://amigo.geneontology.org/amigo/term/GO:0032687	PTPRS
0.076816725	5	1263	3836434415	GO:0033043 Regulation of organelle organization	https://amigo.geneontology.org/amigo/term/GO:0033043	TAPT1 PTPRS GCH1 EPHA1 HUWE1
0.076816725	1	8	1211354167	GO:0034164 Negative regulation of toll-like receptor 9 signaling pathway	https://amigo.geneontology.org/amigo/term/GO:0034164	PTPRS
0.076816725	2	153	1266775599	GO:0034341 Response to type ii interferon	https://amigo.geneontology.org/amigo/term/GO:0034341	GCH1 JAK1
0.076816725	2	154	1258549784	GO:0034614 Cellular response to reactive oxygen species	https://amigo.geneontology.org/amigo/term/GO:0034614	GCH1 EGFR
0.076816725	1	11	8809848485	GO:0035022 Positive regulation of rac protein signal transduction	https://amigo.geneontology.org/amigo/term/GO:0035022	LRP4
0.076816725	2	155	1250430108	GO:0035150 Regulation of tube size	https://amigo.geneontology.org/amigo/term/GO:0035150	GCH1 EGFR
0.076816725	2	154	1258549784	GO:0035296 Regulation of tube diameter	https://amigo.geneontology.org/amigo/term/GO:0035296	GCH1 EGFR
0.076816725	1	10	9690833333	GO:0035520 Monoubiquitinated protein deubiquitination	https://amigo.geneontology.org/amigo/term/GO:0035520	USP9X
0.076816725	1	11	8809848485	GO:0035723 Interleukin-15-mediated signaling pathway	https://amigo.geneontology.org/amigo/term/GO:0035723	JAK1
0.076816725	1	10	9690833333	GO:0035771 Interleukin-4-mediated signaling pathway	https://amigo.geneontology.org/amigo/term/GO:0035771	JAK1
0.076816725	1	9	1076759259	GO:0038110 Interleukin-2-mediated signaling pathway	https://amigo.geneontology.org/amigo/term/GO:0038110	JAK1
0.076816725	1	8	1211354167	GO:0038111 Interleukin-7-mediated signaling pathway	https://amigo.geneontology.org/amigo/term/GO:0038111	JAK1
0.076816725	1	9	1076759259	GO:0038113 Interleukin-9-mediated signaling pathway	https://amigo.geneontology.org/amigo/term/GO:0038113	JAK1
0.076816725	1	8	1211354167	GO:0038134 Erbb2-egfr signaling pathway	https://amigo.geneontology.org/amigo/term/GO:0038134	EGFR
0.076816725	5	1357	3570682879	GO:0040011 Locomotion	https://amigo.geneontology.org/amigo/term/GO:0040011	MACF1 EPHA1 LBP EGFR RNF41
0.076816725	3	420	692202381	GO:0042176 Regulation of protein catabolic process	https://amigo.geneontology.org/amigo/term/GO:0042176	EGFR USP9X RNF41
0.076816725	2	143	1355361305	GO:0042177 Negative regulation of protein catabolic process	https://amigo.geneontology.org/amigo/term/GO:0042177	EGFR USP9X
0.076816725	2	130	1490897436	GO:0042303 Molting cycle	https://amigo.geneontology.org/amigo/term/GO:0042303	LRP4 EGFR
0.076816725	2	130	1490897436	GO:0042633 Hair cycle	https://amigo.geneontology.org/amigo/term/GO:0042633	LRP4 EGFR
0.076816725	6	1894	3069957761	GO:0043207 Response to external biotic stimulus	https://amigo.geneontology.org/amigo/term/GO:0043207	LBP GCH1 JAK1 TRAF4 HMCN1 PTPRS
0.076816725	5	1251	3873234746	GO:0045087 Innate immune response	https://amigo.geneontology.org/amigo/term/GO:0045087	LBP GCH1 JAK1 TRAF4 PTPRS
0.076816725	2	149	1300782998	GO:0045739 Positive regulation of dna repair	https://amigo.geneontology.org/amigo/term/GO:0045739	RIF1 EGFR
0.076816725	3	434	6698732719	GO:0045859 Regulation of protein kinase activity	https://amigo.geneontology.org/amigo/term/GO:0045859	TRAF4 EGFR EPHA1
0.076816725	1	8	1211354167	GO:0046146 Tetrahydrobiopterin metabolic process	https://amigo.geneontology.org/amigo/term/GO:0046146	GCH1
0.076816725	2	150	1292111111	GO:0046328 Regulation of jnk cascade	https://amigo.geneontology.org/amigo/term/GO:0046328	TRAF4 EGFR
0.076816725	2	144	1345949074	GO:0050768 Negative regulation of neurogenesis	https://amigo.geneontology.org/amigo/term/GO:0050768	PTPRS LRP4
0.076816725	1	10	9690833333	GO:0051124 Synaptic assembly at neuromuscular junction	https://amigo.geneontology.org/amigo/term/GO:0051124	LRP4
0.076816725	4	770	5034199134	GO:0051129 Negative regulation of cellular component organization	https://amigo.geneontology.org/amigo/term/GO:0051129	PTPRS LRP4 HUWE1 SACS
0.076816725	5	1214	3991282262	GO:0051130 Positive regulation of cellular component organization	https://amigo.geneontology.org/amigo/term/GO:0051130	TAPT1 MACF1 GCH1 LRP4 EPHA1
0.076816725	5	1205	4021092669	GO:0051247 Positive regulation of protein metabolic process	https://amigo.geneontology.org/amigo/term/GO:0051247	TRAF4 HUWE1 EGFR LRP4 RNF41
0.076816725	6	1891	3074828133	GO:0051707 Response to other organism	https://amigo.geneontology.org/amigo/term/GO:0051707	LBP GCH1 JAK1 TRAF4 HMCN1 PTPRS
0.076816725	2	152	1275109649	GO:0051961 Negative regulation of nervous system development	https://amigo.geneontology.org/amigo/term/GO:0051961	PTPRS LRP4
0.076816725	1	8	1211354167	GO:0060264 Regulation of respiratory burst involved in inflammatory response	https://amigo.geneontology.org/amigo/term/GO:0060264	LBP
0.076816725	1	7	1384404762	GO:0060267 Positive regulation of respiratory burst	https://amigo.geneontology.org/amigo/term/GO:0060267	LBP
0.076816725	1	11	8809848485	GO:0060397 Growth hormone receptor signaling pathway via jak-stat	https://amigo.geneontology.org/amigo/term/GO:0060397	JAK1
0.076816725	1	9	1076759259	GO:0070255 Regulation of mucus secretion	https://amigo.geneontology.org/amigo/term/GO:0070255	EGFR
0.076816725	1	10	9690833333	GO:0070391 Response to lipoteichoic acid	https://amigo.geneontology.org/amigo/term/GO:0070391	LBP
0.076816725	1	11	8809848485	GO:0070669 Response to interleukin-2	https://amigo.geneontology.org/amigo/term/GO:0070669	JAK1
0.076816725	1	10	9690833333	GO:0071104 Response to interleukin-9	https://amigo.geneontology.org/amigo/term/GO:0071104	JAK1
0.076816725	1	10	9690833333	GO:0071223 Cellular response to lipoteichoic acid	https://amigo.geneontology.org/amigo/term/GO:0071223	LBP
0.076816725	1	11	8809848485	GO:0071350 Cellular response to interleukin-15	https://amigo.geneontology.org/amigo/term/GO:0071350	JAK1
0.076816725	1	9	1076759259	GO:0071352 Cellular response to interleukin-2	https://amigo.geneontology.org/amigo/term/GO:0071352	JAK1
0.076816725	1	9	1076759259	GO:0071355 Cellular response to interleukin-9	https://amigo.geneontology.org/amigo/term/GO:0071355	JAK1
0.076816725	1	11	8809848485	GO:0097104 Postsynaptic membrane assembly	https://amigo.geneontology.org/amigo/term/GO:0097104	LRP4
0.076816725	2	154	1258549784	GO:0097746 Blood vessel diameter maintenance	https://amigo.geneontology.org/amigo/term/GO:0097746	GCH1 EGFR
0.076816725	2	137	1414720195	GO:0098773 Skin epidermis development	https://amigo.geneontology.org/amigo/term/GO:0098773	LRP4 EGFR
0.076816725	2	155	1250430108	GO:0099175 Regulation of postsynapse organization	https://amigo.geneontology.org/amigo/term/GO:0099175	PTPRS LRP4
0.076816725	1	10	9690833333	GO:0110025 Dna strand resection involved in replication fork processing	https://amigo.geneontology.org/amigo/term/GO:0110025	EXO1
0.076816725	1	8	1211354167	GO:0150094 Amyloid-beta clearance by cellular catabolic process	https://amigo.geneontology.org/amigo/term/GO:0150094	LRP4
0.076816725	1	11	8809848485	GO:1901031 Regulation of response to reactive oxygen species	https://amigo.geneontology.org/amigo/term/GO:1901031	GCH1
0.076816725	1	8	1211354167	GO:1901525 Negative regulation of mitophagy	https://amigo.geneontology.org/amigo/term/GO:1901525	RNF41
0.076816725	1	10	9690833333	GO:1903010 Regulation of bone development	https://amigo.geneontology.org/amigo/term/GO:1903010	TAPT1
0.076816725	1	8	1211354167	GO:1903147 Negative regulation of autophagy of mitochondrion	https://amigo.geneontology.org/amigo/term/GO:1903147	RNF41
0.076816725	1	10	9690833333	GO:1903911 Positive regulation of receptor clustering	https://amigo.geneontology.org/amigo/term/GO:1903911	LRP4
0.076816725	1	7	1384404762	GO:1903939 Regulation of torc2 signaling	https://amigo.geneontology.org/amigo/term/GO:1903939	USP9X
0.076816725	1	7	1384404762	GO:1904393 Regulation of skeletal muscle acetylcholine-gated channel clustering	https://amigo.geneontology.org/amigo/term/GO:1904393	LRP4
0.076816725	1	11	8809848485	GO:1905208 Negative regulation of cardiocyte differentiation	https://amigo.geneontology.org/amigo/term/GO:1905208	EGFR
0.078099132	1	12	8075694444	GO:0007250 Activation of nf-kappab-inducing kinase activity	https://amigo.geneontology.org/amigo/term/GO:0007250	TRAF4
0.078099132	1	12	8075694444	GO:0007494 Midgut development	https://amigo.geneontology.org/amigo/term/GO:0007494	EGFR
0.078099132	6	1936	3003357438	GO:0009607 Response to biotic stimulus	https://amigo.geneontology.org/amigo/term/GO:0009607	LBP GCH1 JAK1 TRAF4 HMCN1 PTPRS
0.078099132	6	1934	3006463289	GO:0010647 Positive regulation of cell communication	https://amigo.geneontology.org/amigo/term/GO:0010647	TRAF4 USP9X LBP EGFR LRP4 MACF1
0.078099132	2	162	1196399177	GO:0016064 Immunoglobulin mediated immune response	https://amigo.geneontology.org/amigo/term/GO:0016064	RIF1 EXO1
0.078099132	6	1938	3000257998	GO:0023056 Positive regulation of signaling	https://amigo.geneontology.org/amigo/term/GO:0023056	TRAF4 USP9X LBP EGFR LRP4 MACF1
0.078099132	2	164	1181808943	GO:0038061 Non-canonical nf-kappab signal transduction	https://amigo.geneontology.org/amigo/term/GO:0038061	TRAF4 EGFR
0.078099132	1	12	8075694444	GO:0042416 Dopamine biosynthetic process	https://amigo.geneontology.org/amigo/term/GO:0042416	GCH1
0.078099132	3	466	6238733906	GO:0043549 Regulation of kinase activity	https://amigo.geneontology.org/amigo/term/GO:0043549	TRAF4 EGFR EPHA1
0.078099132	1	12	8075694444	GO:0048671 Negative regulation of collateral sprouting	https://amigo.geneontology.org/amigo/term/GO:0048671	PTPRS
0.078099132	6	1921	3026808954	GO:0048870 Cell motility	https://amigo.geneontology.org/amigo/term/GO:0048870	USP9X MACF1 EPHA1 LBP EGFR RNF41
0.078099132	1	12	8075694444	GO:0051000 Positive regulation of nitric-oxide synthase activity	https://amigo.geneontology.org/amigo/term/GO:0051000	GCH1
0.078099132	1	12	8075694444	GO:0070672 Response to interleukin-15	https://amigo.geneontology.org/amigo/term/GO:0070672	JAK1
0.078099132	1	12	8075694444	GO:0090557 Establishment of endothelial intestinal barrier	https://amigo.geneontology.org/amigo/term/GO:0090557	PTPRS
0.078099132	1	12	8075694444	GO:0097105 Presynaptic membrane assembly	https://amigo.geneontology.org/amigo/term/GO:0097105	LRP4
0.078124533	4	892	4345665172	GO:0042325 Regulation of phosphorylation	https://amigo.geneontology.org/amigo/term/GO:0042325	TRAF4 EGFR EPHA1 LRP4
0.078962622	4	896	4326264881	GO:0051603 Proteolysis involved in protein catabolic process	https://amigo.geneontology.org/amigo/term/GO:0051603	HUWE1 RNF41 TRAF4 USP9X
0.080184194	3	484	6006714876	GO:0016055 Wnt signaling pathway	https://amigo.geneontology.org/amigo/term/GO:0016055	LRP4 MACF1 EGFR
0.080184194	1	13	7454487179	GO:0016446 Somatic hypermutation of immunoglobulin genes	https://amigo.geneontology.org/amigo/term/GO:0016446	EXO1
0.080184194	1	13	7454487179	GO:0034145 Positive regulation of toll-like receptor 4 signaling pathway	https://amigo.geneontology.org/amigo/term/GO:0034145	LBP
0.080184194	8	3241	2392060064	GO:0035556 Intracellular signal transduction	https://amigo.geneontology.org/amigo/term/GO:0035556	TRAF4 JAK1 USP9X EGFR RNF41 LRP4 PTPRS NFE2
0.080184194	1	13	7454487179	GO:0042559 Pteridine-containing compound biosynthetic process	https://amigo.geneontology.org/amigo/term/GO:0042559	GCH1
0.080184194	2	168	1153670635	GO:0051963 Regulation of synapse assembly	https://amigo.geneontology.org/amigo/term/GO:0051963	PTPRS LRP4
0.080184194	1	13	7454487179	GO:0061000 Negative regulation of dendritic spine development	https://amigo.geneontology.org/amigo/term/GO:0061000	PTPRS
0.080184194	1	13	7454487179	GO:0071679 Commissural neuron axon guidance	https://amigo.geneontology.org/amigo/term/GO:0071679	NELL2
0.080184194	1	13	7454487179	GO:0071947 Protein deubiquitination involved in ubiquitin-dependent protein catabolic process	https://amigo.geneontology.org/amigo/term/GO:0071947	USP9X
0.080184194	1	13	7454487179	GO:0097090 Presynaptic membrane organization	https://amigo.geneontology.org/amigo/term/GO:0097090	LRP4
0.080406177	2	172	1126841085	GO:0019724 B cell mediated immunity	https://amigo.geneontology.org/amigo/term/GO:0019724	RIF1 EXO1
0.080406177	2	172	1126841085	GO:0045766 Positive regulation of angiogenesis	https://amigo.geneontology.org/amigo/term/GO:0045766	EPHA1 JAK1
0.080756174	10	4704	2060126134	GO:0048583 Regulation of response to stimulus	https://amigo.geneontology.org/amigo/term/GO:0048583	TRAF4 LRP4 RIF1 USP9X LBP EGFR RNF41 PTPRS GCH1 MACF1
0.081748504	1	14	692202381	GO:0002566 Somatic diversification of immune receptors via somatic mutation	https://amigo.geneontology.org/amigo/term/GO:0002566	EXO1
0.081748504	9	3988	2186998495	GO:0009893 Positive regulation of metabolic process	https://amigo.geneontology.org/amigo/term/GO:0009893	TRAF4 RIF1 HUWE1 LBP EGFR GCH1 LRP4 RNF41 NFE2
0.081748504	5	1431	3386035406	GO:0016310 Phosphorylation	https://amigo.geneontology.org/amigo/term/GO:0016310	TRAF4 EGFR EPHA1 LRP4 JAK1
0.081748504	2	175	110752381	GO:0030307 Positive regulation of cell growth	https://amigo.geneontology.org/amigo/term/GO:0030307	MACF1 EGFR
0.081748504	1	14	692202381	GO:0038203 Torc2 signaling	https://amigo.geneontology.org/amigo/term/GO:0038203	USP9X
0.081748504	1	14	692202381	GO:0048251 Elastic fiber assembly	https://amigo.geneontology.org/amigo/term/GO:0048251	THSD4
0.081748504	1	14	692202381	GO:0061029 Eyelid development in camera-type eye	https://amigo.geneontology.org/amigo/term/GO:0061029	EGFR
0.081748504	1	14	692202381	GO:0070141 Response to uv-a	https://amigo.geneontology.org/amigo/term/GO:0070141	EGFR
0.081748504	1	14	692202381	GO:0071340 Skeletal muscle acetylcholine-gated channel clustering	https://amigo.geneontology.org/amigo/term/GO:0071340	LRP4
0.081748504	2	175	110752381	GO:1904018 Positive regulation of vasculature development	https://amigo.geneontology.org/amigo/term/GO:1904018	EPHA1 JAK1
0.082367726	8	3304	2346448749	GO:0009966 Regulation of signal transduction	https://amigo.geneontology.org/amigo/term/GO:0009966	TRAF4 LRP4 USP9X LBP EGFR RNF41 PTPRS MACF1
0.08275185	1	15	6460555556	GO:0001325 Formation of extrachromosomal circular dna	https://amigo.geneontology.org/amigo/term/GO:0001325	EXO1
0.08275185	8	3329	2328827476	GO:0002376 Immune system process	https://amigo.geneontology.org/amigo/term/GO:0002376	LBP GCH1 JAK1 TRAF4 RIF1 EXO1 RNF41 PTPRS
0.08275185	1	15	6460555556	GO:0010635 Regulation of mitochondrial fusion	https://amigo.geneontology.org/amigo/term/GO:0010635	HUWE1
0.08275185	10	4782	2026523073	GO:0030154 Cell differentiation	https://amigo.geneontology.org/amigo/term/GO:0030154	LRP4 EGFR JAK1 MACF1 HUWE1 PTPRS TAPT1 RNF41 USP9X NELL2
0.08275185	1	15	6460555556	GO:0032688 Negative regulation of interferon-beta production	https://amigo.geneontology.org/amigo/term/GO:0032688	PTPRS
0.08275185	4	952	4071778711	GO:0032880 Regulation of protein localization	https://amigo.geneontology.org/amigo/term/GO:0032880	HUWE1 EGFR JAK1 LRP4
0.08275185	1	15	6460555556	GO:0038196 Type iii interferon-mediated signaling pathway	https://amigo.geneontology.org/amigo/term/GO:0038196	JAK1
0.08275185	1	15	6460555556	GO:0048681 Negative regulation of axon regeneration	https://amigo.geneontology.org/amigo/term/GO:0048681	PTPRS
0.08275185	10	4783	202609938	GO:0048869 Cellular developmental process	https://amigo.geneontology.org/amigo/term/GO:0048869	LRP4 EGFR JAK1 MACF1 HUWE1 PTPRS TAPT1 RNF41 USP9X NELL2
0.08275185	1	15	6460555556	GO:0071358 Cellular response to type iii interferon	https://amigo.geneontology.org/amigo/term/GO:0071358	JAK1
0.08275185	1	15	6460555556	GO:0090656 T-circle formation	https://amigo.geneontology.org/amigo/term/GO:0090656	EXO1
0.08275185	1	15	6460555556	GO:0090737 Telomere maintenance via telomere trimming	https://amigo.geneontology.org/amigo/term/GO:0090737	EXO1
0.08275185	5	1454	3332473636	GO:0140546 Defense response to symbiont	https://amigo.geneontology.org/amigo/term/GO:0140546	LBP GCH1 JAK1 TRAF4 PTPRS
0.08275185	1	15	6460555556	GO:0150011 Regulation of neuron projection arborization	https://amigo.geneontology.org/amigo/term/GO:0150011	MACF1
0.082792232	2	185	1047657658	GO:0031345 Negative regulation of cell projection organization	https://amigo.geneontology.org/amigo/term/GO:0031345	PTPRS LRP4
0.084724452	3	526	5527091255	GO:0001934 Positive regulation of protein phosphorylation	https://amigo.geneontology.org/amigo/term/GO:0001934	TRAF4 EGFR LRP4
0.084724452	2	189	1025485009	GO:0007254 Jnk cascade	https://amigo.geneontology.org/amigo/term/GO:0007254	TRAF4 EGFR
0.084724452	2	190	1020087719	GO:0008361 Regulation of cell size	https://amigo.geneontology.org/amigo/term/GO:0008361	MACF1 PTPRS
0.084724452	1	16	6056770833	GO:0016558 Protein import into peroxisome matrix	https://amigo.geneontology.org/amigo/term/GO:0016558	USP9X
0.084724452	8	3374	229776724	GO:0031325 Positive regulation of cellular metabolic process	https://amigo.geneontology.org/amigo/term/GO:0031325	TRAF4 LBP EGFR RIF1 GCH1 LRP4 RNF41 NFE2
0.084724452	1	16	6056770833	GO:0034163 Regulation of toll-like receptor 9 signaling pathway	https://amigo.geneontology.org/amigo/term/GO:0034163	PTPRS
0.084724452	1	16	6056770833	GO:0034342 Response to type iii interferon	https://amigo.geneontology.org/amigo/term/GO:0034342	JAK1
0.084724452	1	16	6056770833	GO:0070254 Mucus secretion	https://amigo.geneontology.org/amigo/term/GO:0070254	EGFR
0.084724452	1	16	6056770833	GO:2001034 Positive regulation of double-strand break repair via nonhomologous end joining	https://amigo.geneontology.org/amigo/term/GO:2001034	RIF1
0.085539454	2	192	1009461806	GO:0046777 Protein autophosphorylation	https://amigo.geneontology.org/amigo/term/GO:0046777	EPHA1 EGFR
0.087083245	1	17	5700490196	GO:0002679 Respiratory burst involved in defense response	https://amigo.geneontology.org/amigo/term/GO:0002679	LBP
0.087083245	1	17	5700490196	GO:0032490 Detection of molecule of bacterial origin	https://amigo.geneontology.org/amigo/term/GO:0032490	LBP
0.087083245	1	17	5700490196	GO:0035641 Locomotory exploration behavior	https://amigo.geneontology.org/amigo/term/GO:0035641	MYG1
0.087083245	4	987	3927389395	GO:0046649 Lymphocyte activation	https://amigo.geneontology.org/amigo/term/GO:0046649	RIF1 EXO1 RNF41 JAK1
0.087083245	3	538	5403810409	GO:0051052 Regulation of dna metabolic process	https://amigo.geneontology.org/amigo/term/GO:0051052	RIF1 EGFR GCH1
0.087083245	3	538	5403810409	GO:0051338 Regulation of transferase activity	https://amigo.geneontology.org/amigo/term/GO:0051338	TRAF4 EGFR EPHA1
0.087083245	1	17	5700490196	GO:0070571 Negative regulation of neuron projection regeneration	https://amigo.geneontology.org/amigo/term/GO:0070571	PTPRS
0.087083245	1	17	5700490196	GO:1903909 Regulation of receptor clustering	https://amigo.geneontology.org/amigo/term/GO:1903909	LRP4
0.088274328	3	542	5363929889	GO:0034329 Cell junction assembly	https://amigo.geneontology.org/amigo/term/GO:0034329	MACF1 PTPRS LRP4
0.088966395	7	2748	2468552887	GO:0031324 Negative regulation of cellular metabolic process	https://amigo.geneontology.org/amigo/term/GO:0031324	LBP EPHA1 RIF1 GCH1 RNF41 PTPRS USP9X
0.089813857	7	2755	2462280702	GO:0009605 Response to external stimulus	https://amigo.geneontology.org/amigo/term/GO:0009605	LBP GCH1 JAK1 TRAF4 PTPRS HMCN1 EGFR
0.090191232	4	1002	3868596141	GO:0051093 Negative regulation of developmental process	https://amigo.geneontology.org/amigo/term/GO:0051093	PTPRS LRP4 HUWE1 EGFR
0.090226862	1	18	5383796296	GO:0046653 Tetrahydrofolate metabolic process	https://amigo.geneontology.org/amigo/term/GO:0046653	GCH1
0.090226862	1	18	5383796296	GO:0060263 Regulation of respiratory burst	https://amigo.geneontology.org/amigo/term/GO:0060263	LBP
0.09106661	2	205	9454471545	GO:0031099 Regeneration	https://amigo.geneontology.org/amigo/term/GO:0031099	PTPRS EGFR
0.09106661	3	553	5257233273	GO:0042327 Positive regulation of phosphorylation	https://amigo.geneontology.org/amigo/term/GO:0042327	TRAF4 EGFR LRP4
0.09106661	2	205	9454471545	GO:1905475 Regulation of protein localization to membrane	https://amigo.geneontology.org/amigo/term/GO:1905475	EGFR LRP4
0.092379714	1	19	5100438596	GO:0000028 Ribosomal small subunit assembly	https://amigo.geneontology.org/amigo/term/GO:0000028	PWP2
0.092379714	2	207	9363123994	GO:0000302 Response to reactive oxygen species	https://amigo.geneontology.org/amigo/term/GO:0000302	GCH1 EGFR
0.092379714	3	559	5200805009	GO:0010638 Positive regulation of organelle organization	https://amigo.geneontology.org/amigo/term/GO:0010638	TAPT1 GCH1 EPHA1
0.092379714	4	1021	3796604636	GO:0019220 Regulation of phosphate metabolic process	https://amigo.geneontology.org/amigo/term/GO:0019220	TRAF4 EGFR EPHA1 LRP4
0.092379714	1	19	5100438596	GO:0050884 Neuromuscular process controlling posture	https://amigo.geneontology.org/amigo/term/GO:0050884	GCH1
0.092379714	4	1022	3792889759	GO:0051174 Regulation of phosphorus metabolic process	https://amigo.geneontology.org/amigo/term/GO:0051174	TRAF4 EGFR EPHA1 LRP4
0.092379714	1	19	5100438596	GO:0099151 Regulation of postsynaptic density assembly	https://amigo.geneontology.org/amigo/term/GO:0099151	PTPRS
0.092482465	6	2154	2699396472	GO:1902531 Regulation of intracellular signal transduction	https://amigo.geneontology.org/amigo/term/GO:1902531	TRAF4 USP9X EGFR RNF41 LRP4 PTPRS
0.093914135	1	20	4845416667	GO:0002281 Macrophage activation involved in immune response	https://amigo.geneontology.org/amigo/term/GO:0002281	LBP
0.093914135	2	214	9056853583	GO:0021543 Pallium development	https://amigo.geneontology.org/amigo/term/GO:0021543	PTPRS EGFR
0.093914135	1	20	4845416667	GO:0050999 Regulation of nitric-oxide synthase activity	https://amigo.geneontology.org/amigo/term/GO:0050999	GCH1
0.093914135	2	214	9056853583	GO:0062207 Regulation of pattern recognition receptor signaling pathway	https://amigo.geneontology.org/amigo/term/GO:0062207	LBP PTPRS
0.093914135	1	20	4845416667	GO:0070102 Interleukin-6-mediated signaling pathway	https://amigo.geneontology.org/amigo/term/GO:0070102	JAK1
0.093914135	1	20	4845416667	GO:0090084 Negative regulation of inclusion body assembly	https://amigo.geneontology.org/amigo/term/GO:0090084	SACS
0.093914135	5	1570	3086252654	GO:0098542 Defense response to other organism	https://amigo.geneontology.org/amigo/term/GO:0098542	LBP GCH1 JAK1 TRAF4 PTPRS
0.093914135	1	20	4845416667	GO:0098761 Cellular response to interleukin-7	https://amigo.geneontology.org/amigo/term/GO:0098761	JAK1
0.094546095	5	1581	3064779675	GO:0009057 Macromolecule catabolic process	https://amigo.geneontology.org/amigo/term/GO:0009057	HUWE1 EGFR RNF41 TRAF4 USP9X
0.094546095	2	216	8972993827	GO:0030323 Respiratory tube development	https://amigo.geneontology.org/amigo/term/GO:0030323	TRAF4 EGFR
0.095432281	1	21	461468254	GO:0008228 Opsonization	https://amigo.geneontology.org/amigo/term/GO:0008228	LBP
0.095432281	1	21	461468254	GO:0009713 Catechol-containing compound biosynthetic process	https://amigo.geneontology.org/amigo/term/GO:0009713	GCH1
0.095432281	1	21	461468254	GO:0032930 Positive regulation of superoxide anion generation	https://amigo.geneontology.org/amigo/term/GO:0032930	EGFR
0.095432281	1	21	461468254	GO:0042423 Catecholamine biosynthetic process	https://amigo.geneontology.org/amigo/term/GO:0042423	GCH1
0.095432281	1	21	461468254	GO:0043586 Tongue development	https://amigo.geneontology.org/amigo/term/GO:0043586	EGFR
0.095432281	1	21	461468254	GO:0048670 Regulation of collateral sprouting	https://amigo.geneontology.org/amigo/term/GO:0048670	PTPRS
0.095432281	2	219	8850076104	GO:0050730 Regulation of peptidyl-tyrosine phosphorylation	https://amigo.geneontology.org/amigo/term/GO:0050730	LRP4 EGFR
0.095432281	1	21	461468254	GO:0098760 Response to interleukin-7	https://amigo.geneontology.org/amigo/term/GO:0098760	JAK1
0.096852686	2	223	8691330344	GO:0002520 Immune system development	https://amigo.geneontology.org/amigo/term/GO:0002520	RIF1 EXO1
0.096852686	1	22	4404924242	GO:0002523 Leukocyte migration involved in inflammatory response	https://amigo.geneontology.org/amigo/term/GO:0002523	LBP
0.096852686	1	22	4404924242	GO:0019430 Removal of superoxide radicals	https://amigo.geneontology.org/amigo/term/GO:0019430	GCH1
0.096852686	1	22	4404924242	GO:0034312 Diol biosynthetic process	https://amigo.geneontology.org/amigo/term/GO:0034312	GCH1
0.096852686	1	22	4404924242	GO:0038083 Peptidyl-tyrosine autophosphorylation	https://amigo.geneontology.org/amigo/term/GO:0038083	EGFR
0.096852686	1	22	4404924242	GO:0045780 Positive regulation of bone resorption	https://amigo.geneontology.org/amigo/term/GO:0045780	EGFR
0.096852686	4	1062	3650031387	GO:0060341 Regulation of cellular localization	https://amigo.geneontology.org/amigo/term/GO:0060341	HUWE1 EGFR JAK1 LRP4
0.096852686	1	22	4404924242	GO:0072662 Protein localization to peroxisome	https://amigo.geneontology.org/amigo/term/GO:0072662	USP9X
0.096852686	1	22	4404924242	GO:0072663 Establishment of protein localization to peroxisome	https://amigo.geneontology.org/amigo/term/GO:0072663	USP9X
0.096852686	5	1609	3011446033	GO:0080134 Regulation of response to stress	https://amigo.geneontology.org/amigo/term/GO:0080134	RIF1 LBP EGFR PTPRS GCH1
0.097684334	2	227	8538179148	GO:0010810 Regulation of cell-substrate adhesion	https://amigo.geneontology.org/amigo/term/GO:0010810	MACF1 EPHA1
0.099671744	1	23	4213405797	GO:0006337 Nucleosome disassembly	https://amigo.geneontology.org/amigo/term/GO:0006337	NFE2
0.099671744	1	23	4213405797	GO:0032928 Regulation of superoxide anion generation	https://amigo.geneontology.org/amigo/term/GO:0032928	EGFR
0.099671744	1	23	4213405797	GO:0099150 Regulation of postsynaptic specialization assembly	https://amigo.geneontology.org/amigo/term/GO:0099150	PTPRS
0.099671744	1	23	4213405797	GO:1900407 Regulation of cellular response to oxidative stress	https://amigo.geneontology.org/amigo/term/GO:1900407	GCH1
0.100952637	3	608	4781661184	GO:0010562 Positive regulation of phosphorus metabolic process	https://amigo.geneontology.org/amigo/term/GO:0010562	TRAF4 EGFR LRP4
0.100952637	3	608	4781661184	GO:0045937 Positive regulation of phosphate metabolic process	https://amigo.geneontology.org/amigo/term/GO:0045937	TRAF4 EGFR LRP4
0.101079842	3	609	4773809524	GO:0030335 Positive regulation of cell migration	https://amigo.geneontology.org/amigo/term/GO:0030335	LBP EGFR EPHA1
0.101194183	1	24	4037847222	GO:0015919 Peroxisomal membrane transport	https://amigo.geneontology.org/amigo/term/GO:0015919	USP9X
0.101194183	1	24	4037847222	GO:0034162 Toll-like receptor 9 signaling pathway	https://amigo.geneontology.org/amigo/term/GO:0034162	PTPRS
0.101194183	1	24	4037847222	GO:0038128 Erbb2 signaling pathway	https://amigo.geneontology.org/amigo/term/GO:0038128	EGFR
0.101194183	1	24	4037847222	GO:0043574 Peroxisomal transport	https://amigo.geneontology.org/amigo/term/GO:0043574	USP9X
0.101194183	1	24	4037847222	GO:0071450 Cellular response to oxygen radical	https://amigo.geneontology.org/amigo/term/GO:0071450	GCH1
0.101194183	1	24	4037847222	GO:0071451 Cellular response to superoxide	https://amigo.geneontology.org/amigo/term/GO:0071451	GCH1
0.102047377	2	240	8075694444	GO:0006282 Regulation of dna repair	https://amigo.geneontology.org/amigo/term/GO:0006282	RIF1 EGFR
0.102047377	1	25	3876333333	GO:0010460 Positive regulation of heart rate	https://amigo.geneontology.org/amigo/term/GO:0010460	GCH1
0.102047377	1	25	3876333333	GO:0032986 Protein-dna complex disassembly	https://amigo.geneontology.org/amigo/term/GO:0032986	NFE2
0.102047377	1	25	3876333333	GO:0035335 Peptidyl-tyrosine dephosphorylation	https://amigo.geneontology.org/amigo/term/GO:0035335	PTPRS
0.102047377	1	25	3876333333	GO:0060571 Morphogenesis of an epithelial fold	https://amigo.geneontology.org/amigo/term/GO:0060571	EGFR
0.102047377	4	1105	3507993967	GO:0070925 Organelle assembly	https://amigo.geneontology.org/amigo/term/GO:0070925	TAPT1 PWP2 USP9X PTPRS
0.102047377	1	25	3876333333	GO:0090023 Positive regulation of neutrophil chemotaxis	https://amigo.geneontology.org/amigo/term/GO:0090023	LBP
0.102047377	1	25	3876333333	GO:0090083 Regulation of inclusion body assembly	https://amigo.geneontology.org/amigo/term/GO:0090083	SACS
0.102047377	1	25	3876333333	GO:0150105 Protein localization to cell-cell junction	https://amigo.geneontology.org/amigo/term/GO:0150105	JAK1
0.102047377	1	25	3876333333	GO:1903672 Positive regulation of sprouting angiogenesis	https://amigo.geneontology.org/amigo/term/GO:1903672	JAK1
0.102047377	1	25	3876333333	GO:1904889 Regulation of excitatory synapse assembly	https://amigo.geneontology.org/amigo/term/GO:1904889	PTPRS
0.102136584	3	624	4659054487	GO:0010498 Proteasomal protein catabolic process	https://amigo.geneontology.org/amigo/term/GO:0010498	RNF41 TRAF4 USP9X
0.102844703	1	26	372724359	GO:0022038 Corpus callosum development	https://amigo.geneontology.org/amigo/term/GO:0022038	PTPRS
0.102844703	1	26	372724359	GO:0035020 Regulation of rac protein signal transduction	https://amigo.geneontology.org/amigo/term/GO:0035020	LRP4
0.102844703	3	629	4622019078	GO:0040008 Regulation of growth	https://amigo.geneontology.org/amigo/term/GO:0040008	MACF1 EGFR PTPRS
0.102844703	1	26	372724359	GO:0042059 Negative regulation of epidermal growth factor receptor signaling pathway	https://amigo.geneontology.org/amigo/term/GO:0042059	EGFR
0.102844703	1	26	372724359	GO:0060396 Growth hormone receptor signaling pathway	https://amigo.geneontology.org/amigo/term/GO:0060396	JAK1
0.102844703	1	26	372724359	GO:0140105 Interleukin-10-mediated signaling pathway	https://amigo.geneontology.org/amigo/term/GO:0140105	JAK1
0.102844703	1	26	372724359	GO:1905207 Regulation of cardiocyte differentiation	https://amigo.geneontology.org/amigo/term/GO:1905207	EGFR
0.102844703	1	26	372724359	GO:1905874 Regulation of postsynaptic density organization	https://amigo.geneontology.org/amigo/term/GO:1905874	PTPRS
0.102844703	1	26	372724359	GO:2000042 Negative regulation of double-strand break repair via homologous recombination	https://amigo.geneontology.org/amigo/term/GO:2000042	RIF1
0.102844703	1	26	372724359	GO:2000773 Negative regulation of cellular senescence	https://amigo.geneontology.org/amigo/term/GO:2000773	GCH1
0.104447371	3	637	4563971743	GO:2000147 Positive regulation of cell motility	https://amigo.geneontology.org/amigo/term/GO:2000147	LBP EGFR EPHA1
0.104717113	1	27	3589197531	GO:0000303 Response to superoxide	https://amigo.geneontology.org/amigo/term/GO:0000303	GCH1
0.104717113	1	27	3589197531	GO:0006760 Folic acid-containing compound metabolic process	https://amigo.geneontology.org/amigo/term/GO:0006760	GCH1
0.104717113	1	27	3589197531	GO:0032212 Positive regulation of telomere maintenance via telomerase	https://amigo.geneontology.org/amigo/term/GO:0032212	GCH1
0.104717113	1	27	3589197531	GO:0034112 Positive regulation of homotypic cell-cell adhesion	https://amigo.geneontology.org/amigo/term/GO:0034112	JAK1
0.104717113	1	27	3589197531	GO:0060252 Positive regulation of glial cell proliferation	https://amigo.geneontology.org/amigo/term/GO:0060252	EGFR
0.104717113	1	27	3589197531	GO:0071378 Cellular response to growth hormone stimulus	https://amigo.geneontology.org/amigo/term/GO:0071378	JAK1
0.104721264	5	1703	2845224114	GO:0045595 Regulation of cell differentiation	https://amigo.geneontology.org/amigo/term/GO:0045595	MACF1 PTPRS LRP4 EGFR RNF41
0.106232613	1	28	3461011905	GO:0000305 Response to oxygen radical	https://amigo.geneontology.org/amigo/term/GO:0000305	GCH1
0.106232613	2	255	7600653595	GO:0016358 Dendrite development	https://amigo.geneontology.org/amigo/term/GO:0016358	PTPRS LRP4
0.106232613	1	28	3461011905	GO:0032770 Positive regulation of monooxygenase activity	https://amigo.geneontology.org/amigo/term/GO:0032770	GCH1
0.106232613	1	28	3461011905	GO:0071624 Positive regulation of granulocyte chemotaxis	https://amigo.geneontology.org/amigo/term/GO:0071624	LBP
0.106232613	1	28	3461011905	GO:0072540 T-helper 17 cell lineage commitment	https://amigo.geneontology.org/amigo/term/GO:0072540	JAK1
0.106232613	2	256	7570963542	GO:0099173 Postsynapse organization	https://amigo.geneontology.org/amigo/term/GO:0099173	PTPRS LRP4
0.106232613	2	256	7570963542	GO:1902115 Regulation of organelle assembly	https://amigo.geneontology.org/amigo/term/GO:1902115	TAPT1 PTPRS
0.106320532	2	257	754150454	GO:0050769 Positive regulation of neurogenesis	https://amigo.geneontology.org/amigo/term/GO:0050769	MACF1 EGFR
0.106616135	3	653	4452143951	GO:0007169 Cell surface receptor protein tyrosine kinase signaling pathway	https://amigo.geneontology.org/amigo/term/GO:0007169	EPHA1 JAK1 EGFR
0.106875858	4	1155	3356132756	GO:0035295 Tube development	https://amigo.geneontology.org/amigo/term/GO:0035295	EPHA1 TRAF4 EGFR JAK1
0.106875858	3	655	4438549618	GO:0040017 Positive regulation of locomotion	https://amigo.geneontology.org/amigo/term/GO:0040017	LBP EGFR EPHA1
0.106875858	4	1154	3359041017	GO:0050790 Regulation of catalytic activity	https://amigo.geneontology.org/amigo/term/GO:0050790	TRAF4 GCH1 EGFR EPHA1
0.107197232	2	260	7454487179	GO:0045860 Positive regulation of protein kinase activity	https://amigo.geneontology.org/amigo/term/GO:0045860	TRAF4 EGFR
0.107401646	1	29	3341666667	GO:0043032 Positive regulation of macrophage activation	https://amigo.geneontology.org/amigo/term/GO:0043032	LBP
0.107401646	1	29	3341666667	GO:0060333 Type ii interferon-mediated signaling pathway	https://amigo.geneontology.org/amigo/term/GO:0060333	JAK1
0.107401646	1	29	3341666667	GO:0071549 Cellular response to dexamethasone stimulus	https://amigo.geneontology.org/amigo/term/GO:0071549	EGFR
0.107804642	8	3753	2065725198	GO:0023051 Regulation of signaling	https://amigo.geneontology.org/amigo/term/GO:0023051	TRAF4 LRP4 USP9X LBP EGFR RNF41 PTPRS MACF1
0.108308073	8	3758	2062976761	GO:0010646 Regulation of cell communication	https://amigo.geneontology.org/amigo/term/GO:0010646	TRAF4 LRP4 USP9X LBP EGFR RNF41 PTPRS MACF1
0.108411656	3	664	4378388554	GO:0072657 Protein localization to membrane	https://amigo.geneontology.org/amigo/term/GO:0072657	MACF1 EGFR LRP4
0.108789854	1	30	3230277778	GO:0045830 Positive regulation of isotype switching	https://amigo.geneontology.org/amigo/term/GO:0045830	RIF1
0.108789854	1	30	3230277778	GO:0048668 Collateral sprouting	https://amigo.geneontology.org/amigo/term/GO:0048668	PTPRS
0.108789854	1	30	3230277778	GO:0048679 Regulation of axon regeneration	https://amigo.geneontology.org/amigo/term/GO:0048679	PTPRS
0.108789854	1	30	3230277778	GO:1904358 Positive regulation of telomere maintenance via telomere lengthening	https://amigo.geneontology.org/amigo/term/GO:1904358	GCH1
0.108789854	1	30	3230277778	GO:2001032 Regulation of double-strand break repair via nonhomologous end joining	https://amigo.geneontology.org/amigo/term/GO:2001032	RIF1
0.109890477	2	268	7231965174	GO:1903522 Regulation of blood circulation	https://amigo.geneontology.org/amigo/term/GO:1903522	GCH1 EGFR
0.110358108	3	674	43134273	GO:0043408 Regulation of mapk cascade	https://amigo.geneontology.org/amigo/term/GO:0043408	TRAF4 EGFR RNF41
0.110358108	2	269	7205080545	GO:0060828 Regulation of canonical wnt signaling pathway	https://amigo.geneontology.org/amigo/term/GO:0060828	LRP4 EGFR
0.110477077	2	271	7151906519	GO:0045927 Positive regulation of growth	https://amigo.geneontology.org/amigo/term/GO:0045927	MACF1 EGFR
0.110477077	1	31	3126075269	GO:0097421 Liver regeneration	https://amigo.geneontology.org/amigo/term/GO:0097421	EGFR
0.110477077	1	31	3126075269	GO:0098581 Detection of external biotic stimulus	https://amigo.geneontology.org/amigo/term/GO:0098581	LBP
0.110477077	1	31	3126075269	GO:1901185 Negative regulation of erbb signaling pathway	https://amigo.geneontology.org/amigo/term/GO:1901185	EGFR
0.110815889	4	1187	3265655715	GO:0098609 Cell-cell adhesion	https://amigo.geneontology.org/amigo/term/GO:0098609	PTPRS HMCN1 EGFR JAK1
0.111393151	1	32	3028385417	GO:0002295 T-helper cell lineage commitment	https://amigo.geneontology.org/amigo/term/GO:0002295	JAK1
0.111393151	1	32	3028385417	GO:0034311 Diol metabolic process	https://amigo.geneontology.org/amigo/term/GO:0034311	GCH1
0.111393151	2	274	7073600973	GO:0034599 Cellular response to oxidative stress	https://amigo.geneontology.org/amigo/term/GO:0034599	GCH1 EGFR
0.111393151	1	32	3028385417	GO:0045724 Positive regulation of cilium assembly	https://amigo.geneontology.org/amigo/term/GO:0045724	TAPT1
0.111393151	1	32	3028385417	GO:0045907 Positive regulation of vasoconstriction	https://amigo.geneontology.org/amigo/term/GO:0045907	EGFR
0.111393151	1	32	3028385417	GO:0061036 Positive regulation of cartilage development	https://amigo.geneontology.org/amigo/term/GO:0061036	TAPT1
0.111393151	1	32	3028385417	GO:0065002 Intracellular protein transmembrane transport	https://amigo.geneontology.org/amigo/term/GO:0065002	USP9X
0.111393151	5	1776	272827515	GO:0065009 Regulation of molecular function	https://amigo.geneontology.org/amigo/term/GO:0065009	TRAF4 GCH1 EGFR EPHA1 USP9X
0.111456515	2	276	7022342995	GO:0007416 Synapse assembly	https://amigo.geneontology.org/amigo/term/GO:0007416	PTPRS LRP4
0.111544913	3	687	4231804949	GO:0002250 Adaptive immune response	https://amigo.geneontology.org/amigo/term/GO:0002250	RIF1 EXO1 JAK1
0.111544913	2	280	692202381	GO:0002440 Production of molecular mediator of immune response	https://amigo.geneontology.org/amigo/term/GO:0002440	RIF1 EXO1
0.111544913	1	33	2936616162	GO:0006910 Phagocytosis recognition	https://amigo.geneontology.org/amigo/term/GO:0006910	LBP
0.111544913	1	33	2936616162	GO:0010667 Negative regulation of cardiac muscle cell apoptotic process	https://amigo.geneontology.org/amigo/term/GO:0010667	GCH1
0.111544913	2	278	6971822542	GO:0033674 Positive regulation of kinase activity	https://amigo.geneontology.org/amigo/term/GO:0033674	TRAF4 EGFR
0.111544913	1	33	2936616162	GO:0034143 Regulation of toll-like receptor 4 signaling pathway	https://amigo.geneontology.org/amigo/term/GO:0034143	LBP
0.111544913	1	33	2936616162	GO:0042558 Pteridine-containing compound metabolic process	https://amigo.geneontology.org/amigo/term/GO:0042558	GCH1
0.111544913	1	33	2936616162	GO:0070536 Protein k63-linked deubiquitination	https://amigo.geneontology.org/amigo/term/GO:0070536	USP9X
0.111544913	1	33	2936616162	GO:0070570 Regulation of neuron projection regeneration	https://amigo.geneontology.org/amigo/term/GO:0070570	PTPRS
0.111544913	1	33	2936616162	GO:0090022 Regulation of neutrophil chemotaxis	https://amigo.geneontology.org/amigo/term/GO:0090022	LBP
0.111544913	1	33	2936616162	GO:0097107 Postsynaptic density assembly	https://amigo.geneontology.org/amigo/term/GO:0097107	PTPRS
0.114055734	1	34	2850245098	GO:0008053 Mitochondrial fusion	https://amigo.geneontology.org/amigo/term/GO:0008053	HUWE1
0.114055734	1	34	2850245098	GO:0030517 Negative regulation of axon extension	https://amigo.geneontology.org/amigo/term/GO:0030517	PTPRS
0.114055734	1	34	2850245098	GO:0071353 Cellular response to interleukin-4	https://amigo.geneontology.org/amigo/term/GO:0071353	JAK1
0.114067108	4	1220	3177322404	GO:0051241 Negative regulation of multicellular organismal process	https://amigo.geneontology.org/amigo/term/GO:0051241	LBP PTPRS LRP4 EGFR
0.11448452	2	286	6776806527	GO:0051896 Regulation of phosphatidylinositol 3-kinase/protein kinase b signal transduction	https://amigo.geneontology.org/amigo/term/GO:0051896	RNF41 EGFR
0.114648545	2	287	6753193961	GO:0003018 Vascular process in circulatory system	https://amigo.geneontology.org/amigo/term/GO:0003018	GCH1 EGFR
0.114648545	1	35	2768809524	GO:0007435 Salivary gland morphogenesis	https://amigo.geneontology.org/amigo/term/GO:0007435	EGFR
0.114648545	1	35	2768809524	GO:0043373 Cd4-positive alpha-beta t cell lineage commitment	https://amigo.geneontology.org/amigo/term/GO:0043373	JAK1
0.114648545	1	35	2768809524	GO:0045737 Positive regulation of cyclin-dependent protein serine/threonine kinase activity	https://amigo.geneontology.org/amigo/term/GO:0045737	EGFR
0.114648545	3	706	4117917847	GO:0051276 Chromosome organization	https://amigo.geneontology.org/amigo/term/GO:0051276	RIF1 GCH1 EXO1
0.114648545	1	35	2768809524	GO:0099560 Synaptic membrane adhesion	https://amigo.geneontology.org/amigo/term/GO:0099560	PTPRS
0.114648545	1	35	2768809524	GO:0140058 Neuron projection arborization	https://amigo.geneontology.org/amigo/term/GO:0140058	MACF1
0.114648545	4	1227	3159195871	GO:1902533 Positive regulation of intracellular signal transduction	https://amigo.geneontology.org/amigo/term/GO:1902533	TRAF4 USP9X EGFR LRP4
0.116002187	1	37	2619144144	GO:0002363 Alpha-beta t cell lineage commitment	https://amigo.geneontology.org/amigo/term/GO:0002363	JAK1
0.116002187	3	715	4066083916	GO:0002694 Regulation of leukocyte activation	https://amigo.geneontology.org/amigo/term/GO:0002694	LBP RIF1 RNF41
0.116002187	1	36	2691898148	GO:0009954 Proximal/distal pattern formation	https://amigo.geneontology.org/amigo/term/GO:0009954	LRP4
0.116002187	1	36	2691898148	GO:0010664 Negative regulation of striated muscle cell apoptotic process	https://amigo.geneontology.org/amigo/term/GO:0010664	GCH1
0.116002187	2	295	6570056497	GO:0010721 Negative regulation of cell development	https://amigo.geneontology.org/amigo/term/GO:0010721	PTPRS LRP4
0.116002187	1	37	2619144144	GO:0016242 Negative regulation of macroautophagy	https://amigo.geneontology.org/amigo/term/GO:0016242	RNF41
0.116002187	1	37	2619144144	GO:0032607 Interferon-alpha production	https://amigo.geneontology.org/amigo/term/GO:0032607	PTPRS
0.116002187	1	37	2619144144	GO:0032647 Regulation of interferon-alpha production	https://amigo.geneontology.org/amigo/term/GO:0032647	PTPRS
0.116002187	1	37	2619144144	GO:0035640 Exploration behavior	https://amigo.geneontology.org/amigo/term/GO:0035640	MYG1
0.116002187	2	296	654786036	GO:0042113 B cell activation	https://amigo.geneontology.org/amigo/term/GO:0042113	RIF1 EXO1
0.116002187	1	37	2619144144	GO:0048265 Response to pain	https://amigo.geneontology.org/amigo/term/GO:0048265	GCH1
0.116002187	1	37	2619144144	GO:0051968 Positive regulation of synaptic transmission glutamatergic	https://amigo.geneontology.org/amigo/term/GO:0051968	EGFR
0.116002187	7	3185	212985348	GO:0065008 Regulation of biological quality	https://amigo.geneontology.org/amigo/term/GO:0065008	MACF1 PTPRS GCH1 LRP4 EGFR USP9X NFE2
0.116002187	1	37	2619144144	GO:0070670 Response to interleukin-4	https://amigo.geneontology.org/amigo/term/GO:0070670	JAK1
0.116002187	1	37	2619144144	GO:1901524 Regulation of mitophagy	https://amigo.geneontology.org/amigo/term/GO:1901524	RNF41
0.116002187	1	36	2691898148	GO:1902624 Positive regulation of neutrophil migration	https://amigo.geneontology.org/amigo/term/GO:1902624	LBP
0.116002187	1	36	2691898148	GO:1902882 Regulation of response to oxidative stress	https://amigo.geneontology.org/amigo/term/GO:1902882	GCH1
0.116002187	1	37	2619144144	GO:1903955 Positive regulation of protein targeting to mitochondrion	https://amigo.geneontology.org/amigo/term/GO:1903955	HUWE1
0.116002187	1	37	2619144144	GO:1904031 Positive regulation of cyclin-dependent protein kinase activity	https://amigo.geneontology.org/amigo/term/GO:1904031	EGFR
0.116218373	3	726	4004476584	GO:0006511 Ubiquitin-dependent protein catabolic process	https://amigo.geneontology.org/amigo/term/GO:0006511	HUWE1 TRAF4 USP9X
0.116506865	2	301	6439091916	GO:0006260 Dna replication	https://amigo.geneontology.org/amigo/term/GO:0006260	EGFR EXO1
0.116506865	1	38	2550219298	GO:0007431 Salivary gland development	https://amigo.geneontology.org/amigo/term/GO:0007431	EGFR
0.116506865	2	301	6439091916	GO:0021537 Telencephalon development	https://amigo.geneontology.org/amigo/term/GO:0021537	PTPRS EGFR
0.116506865	1	38	2550219298	GO:0032768 Regulation of monooxygenase activity	https://amigo.geneontology.org/amigo/term/GO:0032768	GCH1
0.116506865	1	38	2550219298	GO:0042401 Biogenic amine biosynthetic process	https://amigo.geneontology.org/amigo/term/GO:0042401	GCH1
0.116506865	1	38	2550219298	GO:0045823 Positive regulation of heart contraction	https://amigo.geneontology.org/amigo/term/GO:0045823	GCH1
0.116506865	1	38	2550219298	GO:0048143 Astrocyte activation	https://amigo.geneontology.org/amigo/term/GO:0048143	EGFR
0.116506865	1	38	2550219298	GO:0070841 Inclusion body assembly	https://amigo.geneontology.org/amigo/term/GO:0070841	SACS
0.116506865	1	38	2550219298	GO:0071392 Cellular response to estradiol stimulus	https://amigo.geneontology.org/amigo/term/GO:0071392	EGFR
0.116542291	1	39	248482906	GO:0009309 Amine biosynthetic process	https://amigo.geneontology.org/amigo/term/GO:0009309	GCH1
0.116542291	3	736	3950067935	GO:0019941 Modification-dependent protein catabolic process	https://amigo.geneontology.org/amigo/term/GO:0019941	HUWE1 TRAF4 USP9X
0.116542291	1	39	248482906	GO:0043369 Cd4-positive or cd8-positive alpha-beta t cell lineage commitment	https://amigo.geneontology.org/amigo/term/GO:0043369	JAK1
0.116542291	1	39	248482906	GO:0045191 Regulation of isotype switching	https://amigo.geneontology.org/amigo/term/GO:0045191	RIF1
0.116542291	3	740	3928716216	GO:0045596 Negative regulation of cell differentiation	https://amigo.geneontology.org/amigo/term/GO:0045596	PTPRS LRP4 EGFR
0.116542291	1	39	248482906	GO:0045730 Respiratory burst	https://amigo.geneontology.org/amigo/term/GO:0045730	LBP
0.116542291	1	39	248482906	GO:0046677 Response to antibiotic	https://amigo.geneontology.org/amigo/term/GO:0046677	JAK1
0.116542291	1	39	248482906	GO:0051353 Positive regulation of oxidoreductase activity	https://amigo.geneontology.org/amigo/term/GO:0051353	GCH1
0.116542291	1	39	248482906	GO:0060416 Response to growth hormone	https://amigo.geneontology.org/amigo/term/GO:0060416	JAK1
0.116542291	1	39	248482906	GO:0071711 Basement membrane organization	https://amigo.geneontology.org/amigo/term/GO:0071711	HMCN1
0.116542291	2	305	6354644809	GO:0090150 Establishment of protein localization to membrane	https://amigo.geneontology.org/amigo/term/GO:0090150	MACF1 EGFR
0.116542291	1	39	248482906	GO:1903524 Positive regulation of blood circulation	https://amigo.geneontology.org/amigo/term/GO:1903524	GCH1
0.116692027	3	741	3923414305	GO:0043632 Modification-dependent macromolecule catabolic process	https://amigo.geneontology.org/amigo/term/GO:0043632	HUWE1 TRAF4 USP9X
0.117031438	4	1276	3037878788	GO:1901701 Cellular response to oxygen-containing compound	https://amigo.geneontology.org/amigo/term/GO:1901701	LBP JAK1 EGFR GCH1
0.118079252	1	40	2422708333	GO:0007031 Peroxisome organization	https://amigo.geneontology.org/amigo/term/GO:0007031	USP9X
0.118079252	2	310	6252150538	GO:0051962 Positive regulation of nervous system development	https://amigo.geneontology.org/amigo/term/GO:0051962	MACF1 EGFR
0.118079252	2	311	623204716	GO:0072659 Protein localization to plasma membrane	https://amigo.geneontology.org/amigo/term/GO:0072659	MACF1 EGFR
0.118079252	1	40	2422708333	GO:0098698 Postsynaptic specialization assembly	https://amigo.geneontology.org/amigo/term/GO:0098698	PTPRS
0.118520852	2	312	621207265	GO:0002221 Pattern recognition receptor signaling pathway	https://amigo.geneontology.org/amigo/term/GO:0002221	LBP PTPRS
0.120020039	3	755	3850662252	GO:0018193 Peptidyl-amino acid modification	https://amigo.geneontology.org/amigo/term/GO:0018193	EGFR EPHA1 LRP4
0.120020039	1	41	2363617886	GO:1903749 Positive regulation of establishment of protein localization to mitochondrion	https://amigo.geneontology.org/amigo/term/GO:1903749	HUWE1
0.120020039	1	41	2363617886	GO:2000780 Negative regulation of double-strand break repair	https://amigo.geneontology.org/amigo/term/GO:2000780	RIF1
0.120284387	2	316	6133438819	GO:0045765 Regulation of angiogenesis	https://amigo.geneontology.org/amigo/term/GO:0045765	EPHA1 JAK1
0.120452708	2	317	6114090431	GO:0000209 Protein polyubiquitination	https://amigo.geneontology.org/amigo/term/GO:0000209	HUWE1 RNF41
0.120452708	1	42	230734127	GO:0009595 Detection of biotic stimulus	https://amigo.geneontology.org/amigo/term/GO:0009595	LBP
0.120452708	1	42	230734127	GO:0042417 Dopamine metabolic process	https://amigo.geneontology.org/amigo/term/GO:0042417	GCH1
0.120452708	1	42	230734127	GO:0044743 Protein transmembrane import into intracellular organelle	https://amigo.geneontology.org/amigo/term/GO:0044743	USP9X
0.120452708	1	42	230734127	GO:0045773 Positive regulation of axon extension	https://amigo.geneontology.org/amigo/term/GO:0045773	MACF1
0.120452708	2	319	6075757576	GO:0048638 Regulation of developmental growth	https://amigo.geneontology.org/amigo/term/GO:0048638	MACF1 PTPRS
0.120452708	1	42	230734127	GO:0071276 Cellular response to cadmium ion	https://amigo.geneontology.org/amigo/term/GO:0071276	EGFR
0.120452708	1	42	230734127	GO:0090630 Activation of gtpase activity	https://amigo.geneontology.org/amigo/term/GO:0090630	EPHA1
0.120610811	1	43	2253682171	GO:0000462 Maturation of ssu-rrna from tricistronic rrna transcript (ssu-rrna 5.8s rrna lsu-rrna)	https://amigo.geneontology.org/amigo/term/GO:0000462	PWP2
0.120610811	3	768	3785481771	GO:0006338 Chromatin remodeling	https://amigo.geneontology.org/amigo/term/GO:0006338	RIF1 HUWE1 NFE2
0.120610811	3	768	3785481771	GO:0006897 Endocytosis	https://amigo.geneontology.org/amigo/term/GO:0006897	LBP EGFR LRP4
0.120610811	2	322	6019151139	GO:0030336 Negative regulation of cell migration	https://amigo.geneontology.org/amigo/term/GO:0030336	EPHA1 RNF41
0.120610811	7	3290	2061879433	GO:0033036 Macromolecule localization	https://amigo.geneontology.org/amigo/term/GO:0033036	HUWE1 USP9X MACF1 LBP EGFR JAK1 LRP4
0.120610811	2	322	6019151139	GO:0043491 Phosphatidylinositol 3-kinase/protein kinase b signal transduction	https://amigo.geneontology.org/amigo/term/GO:0043491	RNF41 EGFR
0.120610811	1	43	2253682171	GO:0045738 Negative regulation of dna repair	https://amigo.geneontology.org/amigo/term/GO:0045738	RIF1
0.120610811	2	323	6000515996	GO:0050807 Regulation of synapse organization	https://amigo.geneontology.org/amigo/term/GO:0050807	PTPRS LRP4
0.120610811	3	768	3785481771	GO:0051668 Localization within membrane	https://amigo.geneontology.org/amigo/term/GO:0051668	MACF1 EGFR LRP4
0.120610811	1	43	2253682171	GO:0071364 Cellular response to epidermal growth factor stimulus	https://amigo.geneontology.org/amigo/term/GO:0071364	EGFR
0.120610811	2	322	6019151139	GO:1901342 Regulation of vasculature development	https://amigo.geneontology.org/amigo/term/GO:1901342	EPHA1 JAK1
0.121159262	1	44	2202462121	GO:0006298 Mismatch repair	https://amigo.geneontology.org/amigo/term/GO:0006298	EXO1
0.121159262	1	44	2202462121	GO:0042554 Superoxide anion generation	https://amigo.geneontology.org/amigo/term/GO:0042554	EGFR
0.121159262	1	44	2202462121	GO:0043247 Telomere maintenance in response to dna damage	https://amigo.geneontology.org/amigo/term/GO:0043247	RIF1
0.121159262	1	44	2202462121	GO:0045740 Positive regulation of dna replication	https://amigo.geneontology.org/amigo/term/GO:0045740	EGFR
0.121159262	2	325	5963589744	GO:0051347 Positive regulation of transferase activity	https://amigo.geneontology.org/amigo/term/GO:0051347	TRAF4 EGFR
0.121159262	1	44	2202462121	GO:0060251 Regulation of glial cell proliferation	https://amigo.geneontology.org/amigo/term/GO:0060251	EGFR
0.121159262	1	44	2202462121	GO:0097242 Amyloid-beta clearance	https://amigo.geneontology.org/amigo/term/GO:0097242	LRP4
0.121159262	2	326	5945296524	GO:0098742 Cell-cell adhesion via plasma-membrane adhesion molecules	https://amigo.geneontology.org/amigo/term/GO:0098742	PTPRS HMCN1
0.121159262	1	44	2202462121	GO:1903146 Regulation of autophagy of mitochondrion	https://amigo.geneontology.org/amigo/term/GO:1903146	RNF41
0.121256977	1	45	2153518519	GO:0001941 Postsynaptic membrane organization	https://amigo.geneontology.org/amigo/term/GO:0001941	LRP4
0.121256977	1	45	2153518519	GO:0002360 T cell lineage commitment	https://amigo.geneontology.org/amigo/term/GO:0002360	JAK1
0.121256977	1	45	2153518519	GO:0030279 Negative regulation of ossification	https://amigo.geneontology.org/amigo/term/GO:0030279	LRP4
0.121256977	1	45	2153518519	GO:0043001 Golgi to plasma membrane protein transport	https://amigo.geneontology.org/amigo/term/GO:0043001	MACF1
0.121256977	2	330	5873232323	GO:0050803 Regulation of synapse structure or activity	https://amigo.geneontology.org/amigo/term/GO:0050803	PTPRS LRP4
0.121256977	2	331	5855488419	GO:0060070 Canonical wnt signaling pathway	https://amigo.geneontology.org/amigo/term/GO:0060070	LRP4 EGFR
0.121256977	1	45	2153518519	GO:0071354 Cellular response to interleukin-6	https://amigo.geneontology.org/amigo/term/GO:0071354	JAK1
0.121256977	1	45	2153518519	GO:0072539 T-helper 17 cell differentiation	https://amigo.geneontology.org/amigo/term/GO:0072539	JAK1
0.121256977	1	45	2153518519	GO:0150052 Regulation of postsynapse assembly	https://amigo.geneontology.org/amigo/term/GO:0150052	LRP4
0.121256977	1	45	2153518519	GO:1903670 Regulation of sprouting angiogenesis	https://amigo.geneontology.org/amigo/term/GO:1903670	JAK1
0.121256977	1	45	2153518519	GO:1904861 Excitatory synapse assembly	https://amigo.geneontology.org/amigo/term/GO:1904861	PTPRS
0.122490759	3	788	3689403553	GO:0000165 Mapk cascade	https://amigo.geneontology.org/amigo/term/GO:0000165	TRAF4 EGFR RNF41
0.122490759	1	46	2106702899	GO:0010665 Regulation of cardiac muscle cell apoptotic process	https://amigo.geneontology.org/amigo/term/GO:0010665	GCH1
0.122490759	1	46	2106702899	GO:0034110 Regulation of homotypic cell-cell adhesion	https://amigo.geneontology.org/amigo/term/GO:0034110	JAK1
0.122490759	1	46	2106702899	GO:0042398 Cellular modified amino acid biosynthetic process	https://amigo.geneontology.org/amigo/term/GO:0042398	GCH1
0.122490759	2	335	5785572139	GO:0043588 Skin development	https://amigo.geneontology.org/amigo/term/GO:0043588	LRP4 EGFR
0.122490759	3	788	3689403553	GO:0050865 Regulation of cell activation	https://amigo.geneontology.org/amigo/term/GO:0050865	LBP RIF1 RNF41
0.123747669	6	2640	2202462121	GO:0006793 Phosphorus metabolic process	https://amigo.geneontology.org/amigo/term/GO:0006793	TRAF4 PTPRS EGFR EPHA1 LRP4 JAK1
0.123747669	6	2637	2204967766	GO:0006796 Phosphate-containing compound metabolic process	https://amigo.geneontology.org/amigo/term/GO:0006796	TRAF4 PTPRS EGFR EPHA1 LRP4 JAK1
0.123747669	1	47	2061879433	GO:0032941 Secretion by tissue	https://amigo.geneontology.org/amigo/term/GO:0032941	EGFR
0.123747669	1	47	2061879433	GO:0071548 Response to dexamethasone	https://amigo.geneontology.org/amigo/term/GO:0071548	EGFR
0.123747669	1	47	2061879433	GO:1902622 Regulation of neutrophil migration	https://amigo.geneontology.org/amigo/term/GO:1902622	LBP
0.123747669	2	339	5717305801	GO:2000146 Negative regulation of cell motility	https://amigo.geneontology.org/amigo/term/GO:2000146	EPHA1 RNF41
0.124612296	2	341	5683773216	GO:0002758 Innate immune response-activating signaling pathway	https://amigo.geneontology.org/amigo/term/GO:0002758	LBP PTPRS
0.124639422	1	48	2018923611	GO:0006284 Base-excision repair	https://amigo.geneontology.org/amigo/term/GO:0006284	HUWE1
0.124639422	1	48	2018923611	GO:0006513 Protein monoubiquitination	https://amigo.geneontology.org/amigo/term/GO:0006513	HUWE1
0.124639422	1	48	2018923611	GO:0045124 Regulation of bone resorption	https://amigo.geneontology.org/amigo/term/GO:0045124	EGFR
0.124639422	1	48	2018923611	GO:0046189 Phenol-containing compound biosynthetic process	https://amigo.geneontology.org/amigo/term/GO:0046189	GCH1
0.124639422	1	48	2018923611	GO:0070849 Response to epidermal growth factor	https://amigo.geneontology.org/amigo/term/GO:0070849	EGFR
0.124639422	1	48	2018923611	GO:0140467 Integrated stress response signaling	https://amigo.geneontology.org/amigo/term/GO:0140467	NFE2
0.124727394	2	344	5634205426	GO:0002699 Positive regulation of immune effector process	https://amigo.geneontology.org/amigo/term/GO:0002699	RIF1 LBP
0.124727394	2	344	5634205426	GO:0062197 Cellular response to chemical stress	https://amigo.geneontology.org/amigo/term/GO:0062197	GCH1 EGFR
0.124775983	3	805	3611490683	GO:0009617 Response to bacterium	https://amigo.geneontology.org/amigo/term/GO:0009617	LBP GCH1 HMCN1
0.125786217	1	49	1977721088	GO:0010659 Cardiac muscle cell apoptotic process	https://amigo.geneontology.org/amigo/term/GO:0010659	GCH1
0.125786217	1	49	1977721088	GO:0010662 Regulation of striated muscle cell apoptotic process	https://amigo.geneontology.org/amigo/term/GO:0010662	GCH1
0.125786217	1	49	1977721088	GO:1903214 Regulation of protein targeting to mitochondrion	https://amigo.geneontology.org/amigo/term/GO:1903214	HUWE1
0.125948938	3	811	3584771887	GO:0051248 Negative regulation of protein metabolic process	https://amigo.geneontology.org/amigo/term/GO:0051248	EGFR EPHA1 USP9X
0.125948938	2	348	5569444444	GO:1904951 Positive regulation of establishment of protein localization	https://amigo.geneontology.org/amigo/term/GO:1904951	HUWE1 EGFR
0.126450946	1	50	1938166667	GO:0002714 Positive regulation of b cell mediated immunity	https://amigo.geneontology.org/amigo/term/GO:0002714	RIF1
0.126450946	1	50	1938166667	GO:0002891 Positive regulation of immunoglobulin mediated immune response	https://amigo.geneontology.org/amigo/term/GO:0002891	RIF1
0.126450946	1	50	1938166667	GO:0035272 Exocrine system development	https://amigo.geneontology.org/amigo/term/GO:0035272	EGFR
0.126450946	1	50	1938166667	GO:0045776 Negative regulation of blood pressure	https://amigo.geneontology.org/amigo/term/GO:0045776	GCH1
0.126450946	1	50	1938166667	GO:0070741 Response to interleukin-6	https://amigo.geneontology.org/amigo/term/GO:0070741	JAK1
0.126450946	1	50	1938166667	GO:1900087 Positive regulation of g1/s transition of mitotic cell cycle	https://amigo.geneontology.org/amigo/term/GO:1900087	EGFR
0.127319417	2	353	5490557129	GO:0001818 Negative regulation of cytokine production	https://amigo.geneontology.org/amigo/term/GO:0001818	LBP PTPRS
0.127319417	1	51	1900163399	GO:0031103 Axon regeneration	https://amigo.geneontology.org/amigo/term/GO:0031103	PTPRS
0.127319417	1	51	1900163399	GO:0031297 Replication fork processing	https://amigo.geneontology.org/amigo/term/GO:0031297	EXO1
0.127319417	1	51	1900163399	GO:0032210 Regulation of telomere maintenance via telomerase	https://amigo.geneontology.org/amigo/term/GO:0032210	GCH1
[truncated: 333 more rows]

## Sheet: May_enrichment_in_males
Enrichment FDR	nGenes	Pathway Genes	Fold Enrichment	Pathway	URL	Genes
[truncated: 764 more rows]

[truncated: 2 more sheets: June_enrichment_in_females, June_enrichment_in_NR]
