# Supplementary figures and images for: Phagocytosis of microbial symbionts supports embryonic nutrition in the sponge Halichondria panicea
Source: Research Square preprint supplement (doi:10.21203/rs.3.rs-7749905/v1), 2025-12-02

Percentage of the population

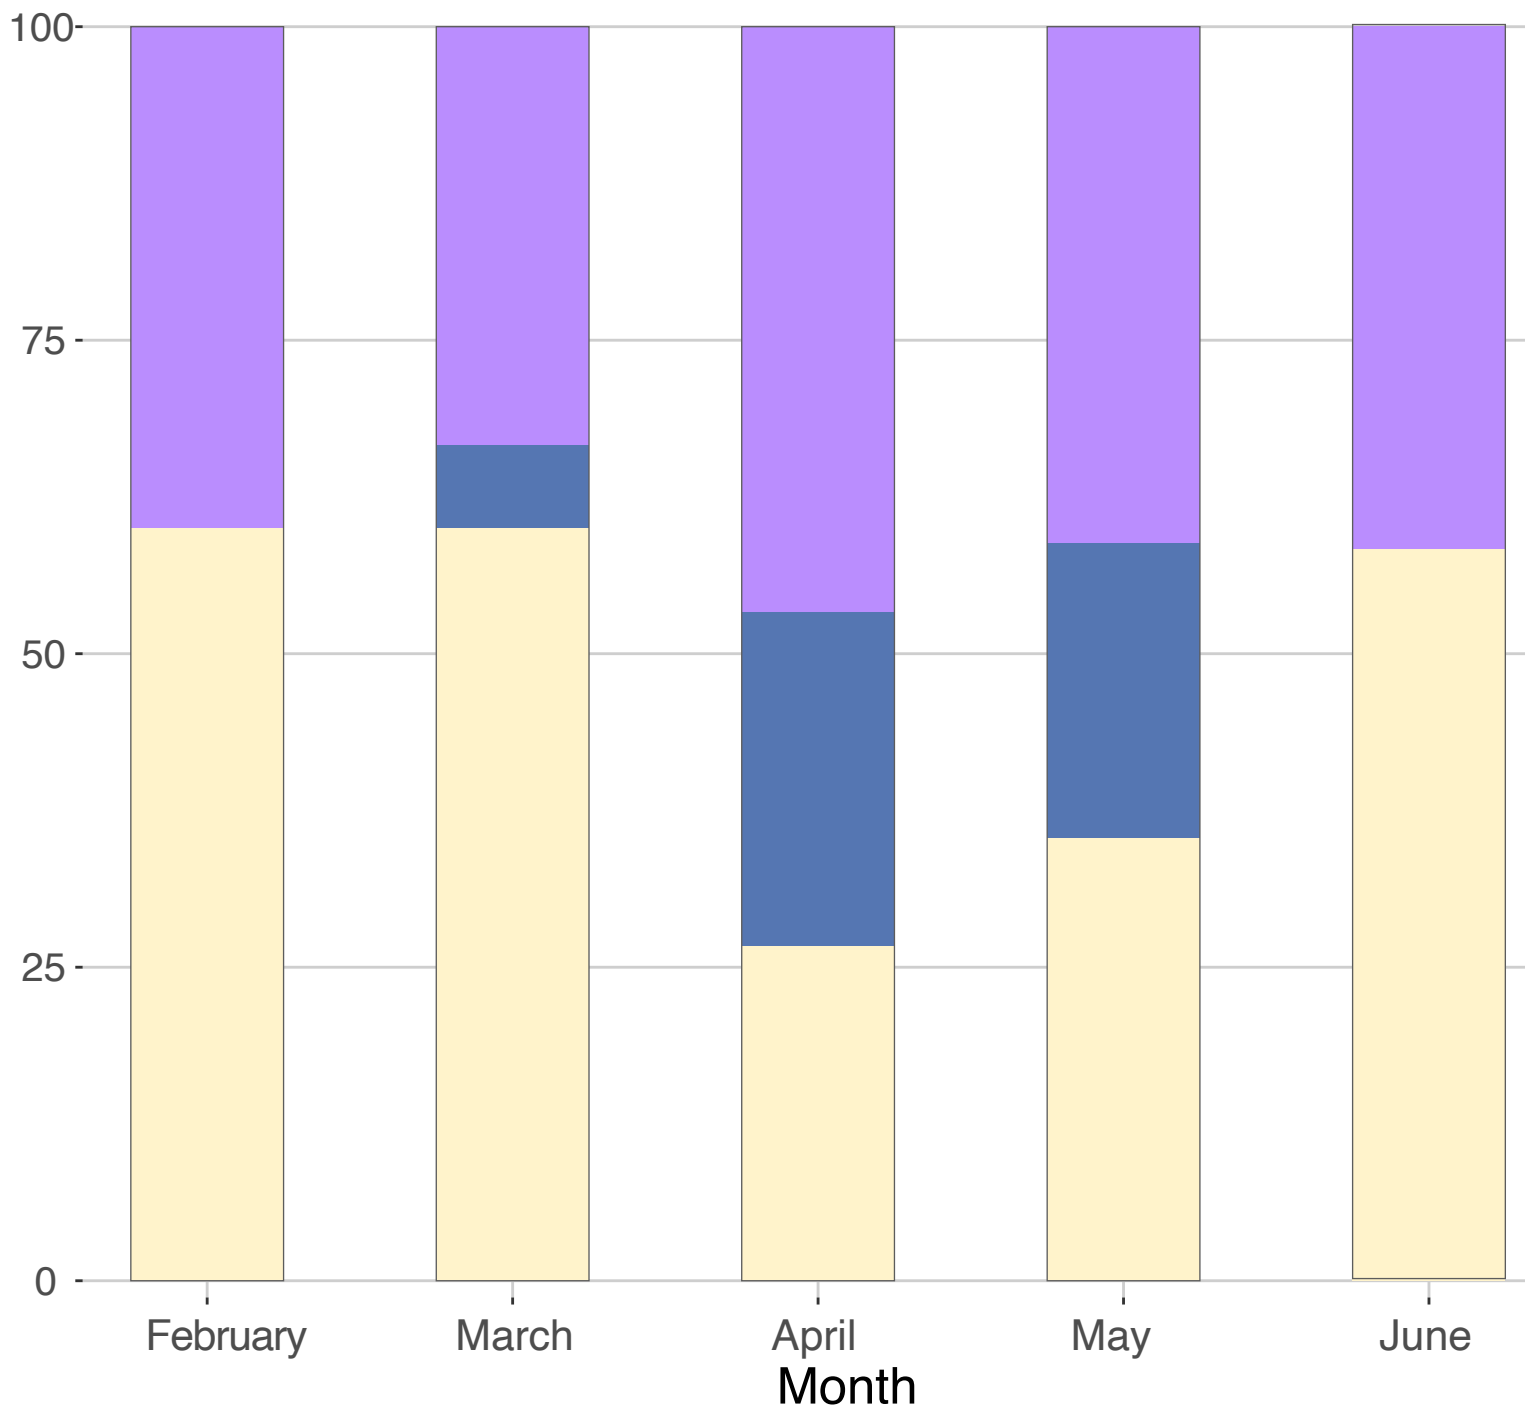

Condition

- Females
- Males
- Non reproductive

Supplement: Supplementary file 1 [file 1ad03a8fc58ba9c9ba0323ae.pdf]
